# Supplementary material for: A corticostriatal deficit promotes temporal distortion of automatic action in ageing
Source: eLife journal article supplement (doi:10.7554/elife.29908), 2017-10-23
Supplement: supp [file elife-29908-supp-v1.zip]

Archive with 21 entries (21 files):
- elife_poa_e29908_Figure_3_figure_supplement_1.pdf
- elife_poa_e29908_Figure_5_source_data_2.xlsx
- elife_poa_e29908_Video_2.mp4
- elife_poa_e29908_Figure_5_figure_supplement_1.pdf
- elife_poa_e29908_Figure_2_figure_supplement_1.pdf
- elife_poa_e29908_Supplementary_File_1.zip
- elife_poa_e29908_Figure_3_source_data_1.xlsx
- elife_poa_e29908_Figure_2_source_data2.xlsx
- elife_poa_e29908_Figure_5_source_data_1.xlsx
- elife_poa_e29908_Video_1.mp4
- elife_poa_e29908_Figure_1_source_data_1.xlsx
- elife_poa_e29908_Figure_1_figure_supplement_2.pdf
- elife_poa_e29908_Figure_3_figure_supplement_2.pdf
- elife_poa_e29908_Figure_4_source_data_1.xlsx
- elife_poa_e29908_Figure_6_source_data_1.xlsx
- elife_poa_e29908_Figure_6_figure_supplement_1.pdf
- elife_poa_e29908_Figure_1_figure_supplement_1.pdf
- elife_poa_e29908_Figure_5_figure_supplement_2.pdf
- elife_poa_e29908_Figure_1_source_data_2.xlsx
- elife_poa_e29908_Transparent_Reporting_File.pdf
- elife_poa_e29908_Figure_1_source_data_3.xlsx
