# Supplementary material for: A corticostriatal deficit promotes temporal distortion of automatic action in ageing
Source: eLife journal article supplement (doi:10.7554/elife.29908), 2017-10-23
Supplement: supp [file elife-29908-supp-v1.zip › elife_poa_e29908_Figure_1_source_data_1.xlsx]

## Sheet: Sheet1
\Experiment code: JBG007
\Experiment summary: 8 Aged (A1-8; 20-22 months old) and 8 Young (Y1-8; 2-3 months old) mice (C57-Bl6) were submitted to instrumental training (increasing random ratio schedule of reinfocement). CRF (days 1-3): constant reinforcement; RR5 (days 4-6): random ratio 5; RR10 (days 7-12): random ratio 10; RR20 (days 13-17): random ratio 20. Active lever counterbalanced (Left [L] or Right [R]). \Sequen…
\Data type and description: event-time stamp data. The time at which each event occurred (Y matrix, values 1-4) was stamped with a 10 ms resolution (Z matrix, centiseconds). Y matrix: 1=active response; 2=inactive response; 3=delivered pellet; 4=Magazine entry (time-controlled; consecutive entries within 200ms are not repeatedly stamped). Data were obtained through MED STATE NOTATION (MED Associa…
\Authors: J Bertran-Gonzalez (ORCID: 0000-0002-3794-1782)
DAY 1																																					DAY 2
Y Matrix (event stamp)																		Z Matrix (time stamp)																			Y Matrix (event stamp)
Subject	Y3	Y4	Y7	Y1	Y5	Y2	Y6	Y8	A3	A4	A7	A1	A5	A2	A6	A8		Subject	Y3	Y4	Y7	Y1	Y5	Y2	Y6	Y8	A3	A4	A7	A1	A5	A2	A6	A8			Subject	Y3	Y4	Y7	Y1	Y5	Y2	Y6	Y8	A3	A4	A7	A1
Start Date	07/15/13	07/15/13	07/15/13	07/15/13	07/15/13	07/15/13	07/15/13	07/15/13	07/15/13	07/15/13	07/15/13	07/15/13	07/15/13	07/15/13	07/15/13	07/15/13		Start Date	07/15/13	07/15/13	07/15/13	07/15/13	07/15/13	07/15/13	07/15/13	07/15/13	07/15/13	07/15/13	07/15/13	07/15/13	07/15/13	07/15/13	07/15/13	07/15/13			Start Date	07/16/13	07/16/13	07/16/13	07/16/13	07/16/13	07/16/13	07/16/13	07/16/13	07/16/13	07/16/13	07/16/13	07/16/13
Start Time	08:47:13	10:03:38	08:47:14	09:29:08	08:47:14	09:29:08	08:47:14	09:29:08	08:47:14	09:29:09	08:47:14	09:29:09	08:47:14	09:29:09	08:47:14	09:29:09		Start Time	08:47:13	10:03:38	08:47:14	09:29:08	08:47:14	09:29:08	08:47:14	09:29:08	08:47:14	09:29:09	08:47:14	09:29:09	08:47:14	09:29:09	08:47:14	09:29:09			Start Time	09:45:30	10:27:09	09:45:30	10:27:09	09:45:30	10:27:09	09:45:30	10:27:09	09:45:30	10:27:09	09:45:30	10:27:09
Experiment	JBG007	JBG007	JBG007	JBG007	JBG007	JBG007	JBG007	JBG007	JBG007	JBG007	JBG007	JBG007	JBG007	JBG007	JBG007	JBG007		Experiment	JBG007	JBG007	JBG007	JBG007	JBG007	JBG007	JBG007	JBG007	JBG007	JBG007	JBG007	JBG007	JBG007	JBG007	JBG007	JBG007			Experiment	JBG007	JBG007	JBG007	JBG007	JBG007	JBG007	JBG007	JBG007	JBG007	JBG007	JBG007	JBG007
Box	1	1	2	2	3	3	4	4	5	5	6	6	7	7	8	8		Box	1	1	2	2	3	3	4	4	5	5	6	6	7	7	8	8			Box	1	1	2	2	3	3	4	4	5	5	6	6
Total Active Responses (1)	20	9	15	20	2	20	20	20	20	20	20	20	20	20	20	20		Total Active Responses (1)	20	9	15	20	2	20	20	20	20	20	20	20	20	20	20	20			Total Active Responses (1)	20	20	20	20	20	20	20	20	20	20	20	20
Total Inactive Reponses (2)	13	19	13	8	20	12	18	15	15	12	15	72	26	80	43	34		Total Inactive Reponses (2)	13	19	13	8	20	12	18	15	15	12	15	72	26	80	43	34			Total Inactive Reponses (2)	21	2	16	10	17	35	18	3	3	42	11	24
Magazine Entries (4)	50	119	122	135	278	56	78	104	65	102	195	55	143	180	104	122		Magazine Entries (4)	50	119	122	135	278	56	78	104	65	102	195	55	143	180	104	122			Magazine Entries (4)	128	75	107	84	99	85	93	77	24	47	86	58
Delivered Pellets (3)	20	9	15	20	2	20	20	20	20	20	20	20	20	20	20	20		Delivered Pellets (3)	20	9	15	20	2	20	20	20	20	20	20	20	20	20	20	20			Delivered Pellets (3)	20	20	20	20	20	20	20	20	20	20	20	20
Raw Mag Entries	62	150	143	148	300	71	90	125	70	107	233	62	162	220	121	137		Raw Mag Entries	62	150	143	148	300	71	90	125	70	107	233	62	162	220	121	137			Raw Mag Entries	140	88	114	87	108	100	115	90	28	52	104	65
Time (centiseconds)	113837	180001	180001	128507	180001	124182	133917	110215	66248	76105	124600	115607	161717	156375	137774	168972		Time (centiseconds)	113837	180001	180001	128507	180001	124182	133917	110215	66248	76105	124600	115607	161717	156375	137774	168972			Time (centiseconds)	151394	85855	138836	61988	97835	169457	148966	64984	18100	29592	45894	48121
# of Stamped Events	103	156	165	183	302	108	136	159	120	154	250	167	209	300	187	196		# of Stamped Events	103	156	165	183	302	108	136	159	120	154	250	167	209	300	187	196			# of Stamped Events	189	117	163	134	156	160	151	120	67	129	137	122
Y(1)	2	4	4	4	4	2	1	4	1	4	4	1	1	4	2	4		Z(1)	83.11	114.79	20.79	9.99	12.79	1.6	13.11	14.39	1.85	18.39	1.99	34.47	10.92	18.99	51.79	28.59			Y(1)	1	4	1	4	4	4	2	1	1	2	4	4
Y(2)	4	4	4	4	4	4	3	1	3	4	4	3	3	4	4	4		Z(2)	101.19	115.39	37.79	19.39	20.19	34.39	13.22	23.06	1.96	23.59	15.99	34.58	11.03	38.79	64.59	32.59			Y(2)	3	4	3	1	4	1	4	3	3	2	2	4
Y(3)	1	4	4	1	4	1	4	3	4	4	4	4	4	4	4	4		Z(3)	130.3	147.59	41.19	22.2	21.79	40.51	15.99	23.17	3.99	73.99	16.99	37.19	15.79	45.19	95.79	36.39			Y(3)	4	2	4	3	4	3	1	1	1	2	2	4
Y(4)	3	2	4	3	4	3	4	4	4	4	4	4	4	4	4	4		Z(4)	130.41	151.33	46.99	22.31	35.99	40.62	37.99	31.79	11.39	77.79	17.99	46.79	23.19	48.79	219.39	80.19			Y(4)	2	4	4	4	4	1	3	3	3	2	2	1
Y(5)	1	4	2	4	4	1	4	4	4	4	4	1	4	4	4	4		Z(5)	130.98	155.39	69.92	25.39	36.79	41.85	39.19	63.39	28.99	85.39	32.19	74.2	23.59	62.59	244.19	88.39			Y(5)	4	4	4	4	4	3	1	4	1	2	2	3
Y(6)	3	4	2	4	4	3	4	4	4	4	4	3	4	4	4	4		Z(6)	131.09	193.99	74.05	36.19	38.39	41.96	39.99	73.59	44.79	88.99	33.39	74.31	25.99	115.59	256.99	181.79			Y(6)	4	1	4	4	2	4	3	4	3	2	1	4
Y(7)	1	4	4	4	4	4	4	2	2	4	4	4	4	4	4	4		Z(7)	131.88	195.39	85.99	41.39	40.79	48.79	67.99	79.67	47.46	93.59	34.19	77.99	42.79	118.39	257.39	184.39			Y(7)	1	3	4	1	2	4	4	4	1	2	3	4
Y(8)	3	4	4	4	4	4	4	4	4	4	4	4	4	4	4	4		Z(8)	131.99	203.99	86.59	46.79	43.59	57.39	68.59	84.59	64.99	99.59	56.19	88.59	64.59	141.99	277.19	189.19			Y(8)	3	1	4	3	2	4	4	4	3	2	1	4
Y(9)	1	4	1	4	4	4	4	4	4	4	4	4	2	4	4	4		Z(9)	133.18	233.59	103.4	55.39	48.19	66.39	158.39	89.19	79.39	100.99	71.99	92.99	104.37	145.19	281.39	242.39			Y(9)	4	3	4	4	2	4	4	4	1	2	3	4
Y(10)	3	4	3	4	4	4	4	4	4	4	4	4	4	4	4	4		Z(10)	133.29	253.79	103.51	68.39	53.39	111.79	159.99	90.19	104.99	102.59	76.59	128.59	108.99	147.99	306.59	250.79			Y(10)	4	4	4	4	4	4	4	4	3	2	4	2
Y(11)	4	4	1	4	4	4	4	4	4	4	4	4	4	4	4	4		Z(11)	136.19	254.19	104.47	75.79	59.59	117.59	164.39	91.19	109.59	105.99	99.99	151.59	124.99	149.59	311.19	257.39			Y(11)	4	4	4	4	4	4	4	4	1	2	4	1
Y(12)	4	4	3	4	4	1	4	4	4	4	4	1	4	4	2	4		Z(12)	144.99	294.79	104.58	78.59	62.59	124.23	165.19	121.59	121.39	113.99	100.99	177.34	125.79	159.19	316.56	265.79			Y(12)	4	4	2	2	4	2	4	2	3	2	4	3
Y(13)	4	4	1	4	4	3	4	4	4	4	4	3	4	4	2	4		Z(13)	152.39	296.79	105.2	99.79	70.59	124.34	208.59	156.79	130.79	121.99	106.19	177.45	168.79	178.39	321.48	296.39			Y(13)	4	4	4	4	4	2	4	4	1	2	4	1
Y(14)	4	4	3	1	4	1	4	4	4	4	4	1	2	4	2	4		Z(14)	164.39	325.99	105.31	102.01	71.19	126.12	209.79	157.79	149.59	123.59	110.59	178.22	175.73	179.79	322.86	298.59			Y(14)	4	4	4	4	4	4	4	4	3	2	4	3
Y(15)	4	4	4	3	4	3	4	1	4	4	4	3	4	4	4	4		Z(15)	175.79	337.39	117.99	102.12	72.79	126.23	230.79	161.46	153.19	151.59	123.59	178.33	205.39	181.19	330.99	302.19			Y(15)	4	4	4	2	4	4	4	1	1	2	4	1
Y(16)	4	4	4	1	4	1	4	3	1	4	4	1	4	4	2	4		Z(16)	179.19	345.79	126.39	104.19	73.59	127.69	241.59	161.57	203.65	173.99	124.99	179.4	213.19	185.19	373.34	361.59			Y(16)	4	4	2	4	4	4	4	3	3	2	4	3
Y(17)	4	2	4	3	4	3	4	4	3	4	4	3	4	4	2	2		Z(17)	193.39	382.36	135.19	104.3	78.59	127.8	256.99	165.19	203.76	196.39	127.79	179.51	241.79	187.79	374.39	366.87			Y(17)	4	4	1	2	4	4	4	1	4	2	4	4
Y(18)	4	4	4	1	4	2	4	4	1	4	4	1	4	4	2	2		Z(18)	241.59	390.59	189.39	106.77	79.99	133.57	284.79	176.19	205.04	198.99	135.59	181.27	261.99	189.19	375.73	368.5			Y(18)	4	1	3	4	4	4	2	3	4	2	2	4
Y(19)	4	4	4	3	4	4	4	4	3	4	4	3	4	4	2	2		Z(19)	250.79	392.19	189.79	106.88	91.79	145.39	305.39	180.19	205.15	206.39	135.99	181.38	263.19	191.79	376.61	370.85			Y(19)	4	3	1	4	4	4	4	4	4	2	2	4
Y(20)	4	4	4	1	4	4	4	4	1	4	4	1	4	4	2	2		Z(20)	277.39	392.59	201.19	107.42	92.59	155.19	309.19	181.19	206.81	208.59	137.19	181.59	263.59	199.59	376.78	372.73			Y(20)	2	4	3	4	4	4	1	4	4	2	2	4
Y(21)	4	4	1	3	4	4	4	4	3	4	4	3	1	4	2	2		Z(21)	295.99	417.19	206.6	107.53	139.79	165.19	319.99	182.99	206.92	212.19	146.39	181.7	274.77	202.19	376.89	372.8			Y(21)	4	4	1	4	4	2	3	4	4	2	4	4
Y(22)	2	4	3	4	4	4	4	4	1	4	4	4	3	4	4	2		Z(22)	316.89	418.19	206.71	116.19	140.39	276.39	389.99	183.39	210.28	224.99	146.99	184.19	274.88	206.59	379.19	376.44			Y(22)	4	4	3	2	4	4	1	4	4	2	4	4
Y(23)	2	4	4	4	4	4	4	4	3	4	4	4	4	4	2	2		Z(23)	321.35	423.39	210.99	122.59	142.19	345.79	408.19	184.39	210.39	226.19	147.99	192.19	277.59	208.19	382.77	377.57			Y(23)	4	4	4	4	4	4	3	4	4	2	1	4
Y(24)	4	4	4	4	4	4	4	4	4	4	4	4	4	4	2	1		Z(24)	371.59	423.79	251.99	130.19	145.19	374.39	408.99	190.99	215.99	227.79	149.59	200.99	286.99	214.79	382.94	407.53			Y(24)	4	4	4	4	4	4	4	4	4	2	3	4
Y(25)	4	4	4	4	4	4	4	4	4	4	4	4	4	4	2	3		Z(25)	372.19	433.19	294.99	139.79	145.99	416.59	427.59	194.59	222.99	235.59	154.59	201.39	288.59	233.39	383.12	407.64			Y(25)	4	1	4	4	4	1	4	4	4	2	4	4
Y(26)	4	4	4	4	4	2	4	4	4	4	4	4	4	4	2	1		Z(26)	372.59	433.99	296.39	148.99	154.99	428.52	430.19	211.99	229.79	237.59	166.19	212.59	321.39	239.19	387.41	407.94			Y(26)	2	3	4	1	4	3	4	4	4	2	4	4
Y(27)	1	4	4	4	4	2	4	4	4	4	4	4	4	4	2	3		Z(27)	404.6	435.99	321.39	158.59	157.39	429.56	450.79	212.59	240.79	239.99	168.19	223.39	353.59	243.99	387.47	408.05			Y(27)	1	2	4	3	4	1	4	4	4	2	4	4
Y(28)	3	4	4	4	4	2	4	1	4	4	4	4	4	4	2	4		Z(28)	404.71	436.39	322.59	169.79	161.19	431.94	461.99	214.18	248.19	245.59	176.19	247.39	358.39	256.19	387.61	423.39			Y(28)	3	4	4	4	4	3	4	4	1	2	4	4
Y(29)	4	4	4	4	4	2	1	3	4	2	4	4	4	4	2	4		Z(29)	417.99	553.79	325.79	170.39	162.19	432.71	467.73	214.29	253.39	277.04	179.19	258.79	399.99	302.19	387.88	432.59			Y(29)	4	1	4	4	4	4	4	4	3	2	4	2
Y(30)	4	4	4	4	4	4	3	1	4	2	2	4	4	4	2	4		Z(30)	418.39	554.59	356.99	174.39	162.99	457.59	467.84	218.03	256.39	277.83	186.65	292.39	405.79	305.79	388.41	449.39			Y(30)	4	3	4	4	4	4	4	4	4	2	4	2
Y(31)	4	4	4	4	4	4	4	3	4	2	2	4	4	4	2	4		Z(31)	429.39	584.39	368.19	181.19	175.79	459.19	472.19	218.14	257.39	278.29	188.28	298.99	422.39	306.99	392.3	454.39			Y(31)	4	4	2	4	4	4	1	4	4	2	4	2
Y(32)	4	4	4	4	4	1	4	4	4	2	2	4	4	4	2	4		Z(32)	436.79	610.19	368.59	181.99	176.99	529.33	484.79	220.99	261.79	279.55	190.7	300.79	422.99	308.59	392.57	456.59			Y(32)	4	4	4	4	4	4	3	4	4	2	4	2
Y(33)	4	4	4	4	4	3	4	4	4	2	1	2	4	4	4	4		Z(33)	491.39	615.59	386.59	183.39	177.59	529.44	487.59	228.59	262.99	283.3	199.58	311.14	424.79	317.59	395.19	458.39			Y(33)	2	4	4	4	2	2	4	4	1	2	4	2
Y(34)	1	4	4	4	4	1	4	4	4	2	3	2	4	4	4	4		Z(34)	495.11	616.59	417.39	192.59	178.39	540.13	507.39	237.59	266.99	290.54	199.69	313.99	428.39	321.19	409.19	461.59			Y(34)	4	4	4	2	2	2	4	4	3	2	1	2
Y(35)	3	4	4	4	4	3	4	4	4	4	4	2	4	4	4	4		Z(35)	495.22	617.19	424.99	209.39	179.39	540.24	508.99	239.19	276.59	292.99	212.79	314.16	432.79	325.59	438.79	482.79			Y(35)	4	4	4	4	2	1	4	4	1	2	3	2
Y(36)	4	4	4	2	4	1	4	4	4	2	4	2	2	4	4	4		Z(36)	498.39	618.19	425.59	217.57	179.99	542.81	510.39	239.59	281.59	298.04	230.39	318.48	436.49	326.59	440.99	495.79			Y(36)	4	1	4	2	4	3	4	4	3	2	4	2
Y(37)	4	4	4	2	4	3	4	4	2	4	4	2	2	4	2	4		Z(37)	509.79	622.99	437.19	217.76	183.19	542.92	552.99	241.99	286.08	312.19	234.99	318.64	439.12	329.19	500.35	498.39			Y(37)	4	3	4	4	4	4	4	4	1	2	4	2
Y(38)	4	4	4	4	4	1	4	4	2	4	4	2	2	4	2	4		Z(38)	510.59	623.59	445.79	223.59	185.19	545.2	567.79	245.39	287.66	323.19	245.19	318.95	448.55	336.39	500.82	510.99			Y(38)	2	4	4	4	4	4	4	4	3	2	4	4
Y(39)	4	4	4	4	4	3	4	4	2	4	4	2	2	4	4	4		Z(39)	553.79	644.59	448.79	225.19	195.59	545.31	571.79	263.99	287.82	340.19	248.79	319.13	449.27	339.99	519.99	519.39			Y(39)	1	4	2	1	1	4	4	4	1	2	4	4
Y(40)	4	2	4	4	4	4	1	4	2	4	4	2	4	4	2	4		Z(40)	560.79	719.3	459.19	243.99	197.99	550.59	580.1	274.79	288.98	351.39	250.99	319.47	465.99	341.59	553.77	519.99			Y(40)	3	4	2	3	3	4	1	4	3	2	1	1
Y(41)	4	2	4	4	4	4	3	2	2	2	4	2	4	4	2	4		Z(41)	576.79	722.08	484.99	246.19	198.79	561.39	580.21	277.63	289.12	379.56	254.59	319.58	469.99	342.59	553.99	530.59			Y(41)	4	4	4	1	1	4	3	4	1	2	3	3
Y(42)	4	1	4	4	4	4	1	4	2	2	4	2	4	4	4	4		Z(42)	607.59	740.82	485.39	261.19	199.59	561.79	581.42	281.79	290.52	379.73	274.39	319.72	470.39	349.99	565.79	535.99			Y(42)	4	4	4	3	3	4	4	4	3	2	4	4
Y(43)	4	3	2	4	4	4	3	4	2	4	4	2	4	4	1	4		Z(43)	617.19	740.93	493.75	261.99	200.79	570.19	581.53	282.59	291.44	395.19	282.19	319.87	477.19	353.99	567.83	536.39			Y(43)	4	4	4	4	4	1	4	2	1	1	4	4
Y(44)	2	1	2	4	4	4	1	1	4	2	4	2	4	4	3	4		Z(44)	637.28	741.5	497.97	289.79	203.59	571.59	582.64	288.96	298.79	407.03	290.99	320.02	480.19	355.39	567.94	537.79			Y(44)	4	4	4	4	4	3	4	1	3	3	4	4
Y(45)	2	3	2	4	2	4	3	3	4	2	4	2	4	4	1	2		Z(45)	637.81	741.61	499.77	295.39	208.02	581.99	582.75	289.07	306.39	408.08	294.99	320.58	505.39	359.39	570.62	540.19			Y(45)	4	4	4	4	4	4	4	3	4	1	4	1
Y(46)	2	1	4	4	2	4	1	4	4	2	4	2	4	4	3	2		Z(46)	638.72	746.89	530.59	301.99	212.19	583.19	583.42	292.19	309.79	408.31	297.39	321.3	515.59	362.59	570.73	568.44			Y(46)	4	1	4	4	4	4	1	4	4	3	4	3
Y(47)	2	3	4	4	2	4	3	4	4	4	4	2	4	4	1	2		Z(47)	644.19	747	551.59	305.19	215.11	588.59	583.53	308.99	311.39	417.99	298.19	321.46	519.99	376.59	570.88	570.93			Y(47)	4	3	4	4	4	4	3	4	4	1	4	4
Y(48)	2	4	4	1	2	4	1	4	4	4	4	2	4	1	3	4		Z(48)	648.85	748.59	555.79	308.14	219.18	643.39	585.45	313.79	311.99	451.79	302.79	321.58	522.59	378.88	570.99	614.79			Y(48)	4	4	4	4	4	2	4	4	4	3	4	4
Y(49)	2	4	4	3	4	4	3	4	4	4	4	2	4	3	4	4		Z(49)	654.01	759.79	574.39	308.25	223.19	684.59	585.56	314.79	314.39	455.19	313.59	323.63	526.19	378.99	574.99	616.99			Y(49)	4	4	1	4	4	4	4	4	4	1	4	4
Y(50)	2	4	4	1	4	4	4	4	4	4	4	4	4	1	4	4		Z(50)	655.61	769.59	575.39	308.73	223.79	687.99	590.59	315.99	317.59	462.39	316.99	331.59	536.39	387.11	583.79	623.79			Y(50)	4	4	3	4	4	1	4	4	4	3	2	1
Y(51)	4	4	4	3	4	4	4	4	4	4	4	4	2	3	4	4		Z(51)	664.19	784.59	575.99	308.84	225.99	693.19	601.79	316.99	319.79	476.99	319.39	343.39	539.01	387.22	592.59	627.39			Y(51)	1	4	4	4	4	3	4	1	4	1	2	3
Y(52)	1	4	4	1	4	4	4	4	1	1	4	1	4	1	4	4		Z(52)	667.38	816.79	580.79	309.32	246.39	697.39	611.99	321.99	322.63	483.34	333.19	348.26	542.99	393.69	601.99	637.79			Y(52)	3	1	4	1	4	4	4	3	1	3	4	1
Y(53)	3	4	4	3	4	4	4	4	3	3	4	3	4	3	4	4		Z(53)	667.49	823.59	581.99	309.43	247.99	697.79	622.79	361.59	322.74	483.45	334.59	348.37	575.59	393.8	603.59	638.19			Y(53)	4	3	4	3	2	4	4	4	3	1	1	3
Y(54)	1	4	4	1	4	4	4	4	1	1	4	1	4	4	4	4		Z(54)	669.05	838.39	669.19	311.79	251.99	700.39	637.59	368.79	323.13	483.66	355.19	348.56	590.59	414.79	608.79	644.99			Y(54)	4	4	4	4	2	4	2	4	1	3	3	4
Y(55)	3	4	4	3	4	4	4	4	3	3	4	3	4	4	4	4		Z(55)	669.16	840.19	675.99	311.9	255.19	702.39	650.39	371.99	323.24	483.77	361.99	348.67	602.99	423.39	615.99	656.59			Y(55)	4	4	4	4	4	4	2	4	3	1	1	4
Y(56)	1	4	4	4	4	4	4	4	1	1	4	4	4	4	4	4		Z(56)	669.35	842.39	677.39	313.79	255.79	705.19	655.59	375.19	326.53	487.26	373.99	352.19	606.39	432.99	618.99	658.59			Y(56)	4	4	4	1	4	4	2	1	4	3	3	4
Y(57)	3	4	4	4	4	4	2	4	3	3	4	4	4	4	4	4		Z(57)	669.46	847.99	679.39	320.59	257.59	707.39	676.49	376.99	326.64	487.37	382.79	360.59	608.99	445.59	620.79	660.19			Y(57)	4	4	4	3	4	2	2	3	4	1	4	4
Y(58)	1	4	4	4	4	4	4	4	1	1	4	4	4	4	4	4		Z(58)	669.67	848.79	679.79	329.59	258.59	707.79	684.79	388.19	327.2	487.59	383.79	371.59	622.99	448.19	622.99	661.79			Y(58)	4	4	4	4	1	2	4	4	4	3	4	1
Y(59)	3	4	4	4	4	4	4	4	3	3	4	1	2	4	4	4		Z(59)	669.78	908.19	696.19	337.59	264.99	708.39	689.39	389.59	327.31	487.7	389.99	398.58	625.7	450.79	626.39	662.59			Y(59)	4	4	4	4	3	2	4	4	2	1	4	3
Y(60)	1	4	4	4	4	1	4	4	1	1	4	3	4	4	4	1		Z(60)	670.94	909.39	735.19	346.79	266.99	731.23	690.99	407.79	327.64	488.05	394.19	398.69	648.99	452.59	628.19	666.04			Y(60)	4	4	4	4	4	2	4	4	2	3	4	1
Y(61)	3	4	4	4	4	3	4	4	3	3	4	4	4	4	4	3		Z(61)	671.05	924.59	758.59	349.99	268.99	731.34	704.59	412.19	327.75	488.16	402.59	400.99	651.79	453.79	630.39	666.15			Y(61)	4	4	4	4	4	4	1	4	2	4	4	3
Y(62)	4	4	4	4	4	1	4	4	1	1	4	4	4	4	4	1		Z(62)	679.99	932.99	804.19	353.99	270.79	733.6	720.59	465.99	329.08	488.27	404.59	401.39	658.39	455.39	631.19	666.38			Y(62)	4	4	4	4	4	4	3	4	1	4	4	1
Y(63)	4	4	4	4	4	3	4	4	3	3	4	4	1	4	4	3		Z(63)	689.79	935.79	814.79	358.99	290.79	733.71	722.19	479.39	329.19	488.38	418.79	409.19	664.13	456.79	654.39	666.49			Y(63)	4	4	4	4	4	2	1	1	3	4	4	3
Y(64)	4	4	4	4	4	1	4	4	1	4	4	4	3	4	4	4		Z(64)	699.79	943.59	818.99	371.99	322.79	735.24	723.19	481.19	329.58	489.99	426.99	431.19	664.24	465.99	670.39	670.39			Y(64)	4	1	2	1	4	2	3	3	1	4	4	4
Y(65)	4	2	4	4	4	3	4	4	3	4	4	4	1	4	4	4		Z(65)	709.79	954.43	819.79	376.39	327.79	735.35	729.99	488.59	329.69	496.59	431.59	432.79	664.53	468.79	688.19	676.59			Y(65)	2	3	4	3	4	2	4	4	3	4	2	4
Y(66)	4	4	4	4	4	1	4	4	1	4	4	4	3	4	4	4		Z(66)	712.39	963.99	876.99	376.99	389.79	736.25	769.59	489.59	330.65	508.19	440.39	489.99	664.64	474.79	705.99	677.19			Y(66)	2	4	4	4	4	2	4	4	1	4	2	4
Y(67)	4	4	4	4	4	3	4	4	3	4	4	2	1	4	4	4		Z(67)	733.79	964.99	880.99	388.59	390.99	736.36	774.99	490.99	330.76	508.59	443.59	546.88	666.4	482.59	761.99	714.19			Y(67)	2	4	4	4	2	4	4	4	3	4	4	4
Y(68)	4	4	2	1	4	4	4	4	1	4	4	2	3	4	4	4		Z(68)	746.39	977.99	899.57	398.17	394.79	740.99	785.79	505.39	331.85	520.19	444.79	549.15	666.51	490.39	764.59	716.19			Y(68)	2	4	4	1	4	4	4	4	0	4	4	4
Y(69)	4	4	4	3	4	4	4	4	3	4	4	2	1	4	4	4		Z(69)	761.79	989.19	910.99	398.28	397.39	751.19	788.19	505.99	331.96	520.59	447.59	549.31	666.63	492.59	771.39	718.19			Y(69)	4	4	1	3	1	1	4	1	0	4	4	4
Y(70)	4	4	4	4	4	4	4	4	4	4	1	2	3	4	4	4		Z(70)	762.19	989.59	917.79	412.39	397.79	762.99	789.19	508.19	333.79	528.39	449.4	553.61	666.74	494.99	773.39	718.79			Y(70)	4	4	3	4	3	3	4	3	0	4	4	4
Y(71)	1	4	4	4	4	4	2	4	4	4	3	2	1	4	4	4		Z(71)	765.94	993.19	919.59	421.19	399.59	772.59	796.53	509.59	339.79	540.59	449.51	554.07	668	496.99	779.19	720.59			Y(71)	1	1	1	4	4	4	4	4	0	4	4	4
Y(72)	3	4	4	4	4	4	2	4	4	4	1	2	3	4	2	4		Z(72)	766.05	998.99	919.99	435.39	417.99	787.99	806.32	512.59	346.39	549.79	450.78	554.22	668.11	500.19	781.85	721.99			Y(72)	3	3	3	4	4	4	4	4	0	4	4	4
Y(73)	4	4	2	4	4	4	1	4	4	4	3	2	1	4	2	4		Z(73)	780.79	1009.59	923.36	444.79	418.99	811.39	837.01	513.59	353.39	550.99	450.89	554.36	668.24	505.19	782.14	724.19			Y(73)	4	4	4	4	4	4	4	1	0	4	4	4
Y(74)	4	4	2	4	4	4	3	4	4	4	1	2	3	4	2	4		Z(74)	792.59	1032.79	927.52	482.79	420.39	811.79	837.12	532.99	360.59	552.79	451.53	554.98	668.35	509.99	782.59	733.79			Y(74)	4	4	4	4	4	1	4	3	0	4	1	2
Y(75)	4	4	2	4	4	2	1	4	4	4	3	2	4	4	2	4		Z(75)	804.59	1033.59	929.19	483.79	424.19	905	842.18	637.19	367.59	564.79	451.64	555.2	674.39	513.39	787.57	739.19			Y(75)	4	1	4	1	4	3	4	1	0	4	3	2
Y(76)	1	4	1	4	4	4	3	4	4	4	1	2	4	4	2	4		Z(76)	817.26	1051.19	938.76	484.19	432.19	923.59	842.29	638.19	376.39	567.99	451.79	555.41	682.79	527.59	788.05	768.59			Y(76)	4	3	4	3	4	1	4	3	0	4	4	2
Y(77)	3	4	3	4	4	4	1	4	4	4	3	2	4	4	2	4		Z(77)	817.37	1053.19	938.87	487.59	437.79	958.39	843.46	639.99	385.19	570.39	451.9	555.6	692.59	530.39	788.2	770.79			Y(77)	4	4	2	1	1	3	4	4	0	4	4	2
Y(78)	1	4	1	4	2	2	3	1	4	4	4	2	4	4	2	2		Z(78)	820.6	1060.19	941.26	488.19	440.8	964.4	843.57	658.13	395.59	571.79	456.59	558.89	701.59	538.59	788.37	774.09			Y(78)	4	4	1	3	3	4	4	4	0	4	4	2
Y(79)	3	4	3	4	2	4	1	3	4	4	4	2	4	4	2	4		Z(79)	820.71	1092.99	941.37	499.79	442.1	983.79	845.17	658.24	403.19	572.79	464.99	569.8	711.19	541.59	792.34	777.39			Y(79)	4	1	3	4	4	4	4	4	0	4	4	2
Y(80)	1	4	1	2	2	4	3	1	4	4	4	2	4	4	2	4		Z(80)	821.64	1093.59	946.13	508.78	446.47	984.79	845.28	662.2	405.99	575.19	475.59	569.96	711.79	542.19	792.47	780.59			Y(80)	4	3	4	4	4	4	1	4	0	1	1	2
Y(81)	3	4	3	4	4	4	1	3	4	4	4	2	4	4	2	4		Z(81)	821.75	1100.79	946.24	523.79	449.79	1008.59	846.9	662.31	409.39	577.19	487.59	570.15	721.59	548.59	793.06	781.99			Y(81)	1	4	4	4	4	4	3	4	0	3	3	2
Y(82)	4	4	1	4	4	2	3	1	4	4	4	2	4	4	4	4		Z(82)	822.99	1106.39	948.97	524.39	453.19	1018.81	847.01	662.83	411.99	578.99	499.99	571.36	731.39	549.99	795.99	783.79			Y(82)	3	4	4	4	1	4	4	1	0	4	4	2
Y(83)	4	4	3	4	4	2	4	3	4	4	4	2	4	1	4	4		Z(83)	826.59	1112.99	949.08	537.79	484.99	1019.49	854.59	662.94	419.19	581.59	502.39	571.53	732.19	554.49	797.99	789.99			Y(83)	4	1	4	4	3	4	4	3	0	4	4	2
Y(84)	4	4	4	4	2	2	4	1	4	4	4	2	4	3	4	4		Z(84)	830.59	1115.99	963.79	538.39	495.3	1020.22	864.19	667.12	421.79	584.19	504.79	571.76	734.19	554.6	809.79	800.19			Y(84)	4	3	4	1	4	4	4	4	0	4	4	2
Y(85)	2	4	4	4	2	2	4	3	4	4	4	2	4	1	4	4		Z(85)	842.43	1118.99	973.59	539.99	496.37	1020.89	872.79	667.23	427.39	585.79	523.79	571.87	736.59	557.57	830.39	805.39			Y(85)	4	4	4	3	4	2	4	1	0	4	1	2
Y(86)	2	4	4	4	4	4	4	1	4	4	4	2	4	3	2	4		Z(86)	843.24	1121.59	973.99	545.19	509.19	1077.59	882.59	667.47	450.59	591.39	524.39	573.51	764.59	557.68	833.72	824.79			Y(86)	4	4	4	4	4	2	4	3	0	4	3	2
Y(87)	2	4	4	4	4	4	4	3	4	4	4	2	4	4	2	4		Z(87)	917.49	1122.19	974.59	553.39	513.59	1079.79	891.19	667.58	461.99	593.99	525.79	580.01	769.79	560.19	839.61	837.99			Y(87)	1	1	4	4	4	2	4	4	0	4	1	2
Y(88)	4	4	4	4	4	4	4	4	4	4	4	2	4	4	4	4		Z(88)	938.79	1128.59	984.79	559.19	517.99	1085.59	908.19	671.59	464.59	598.79	528.59	580.37	773.99	567.39	847.99	842.19			Y(88)	3	3	1	4	2	2	4	4	0	4	3	1
Y(89)	4	4	4	4	4	1	4	4	4	4	4	2	4	4	4	4		Z(89)	950.59	1131.19	985.39	560.39	521.39	1129.85	952.99	678.19	490.39	601.59	535.79	585.85	781.39	579.39	875.99	849.59			Y(89)	4	1	3	4	2	2	4	1	0	4	4	3
Y(90)	4	4	4	4	4	3	4	4	4	4	4	2	4	4	4	4		Z(90)	1012.59	1134.19	991.79	569.99	526.59	1129.96	965.99	685.39	531.19	602.99	544.59	585.99	793.99	589.79	879.19	856.79			Y(90)	4	3	1	1	2	2	2	3	0	1	4	1
Y(91)	1	4	4	4	4	1	1	4	4	4	4	2	4	4	4	4		Z(91)	1025.85	1171.39	992.19	572.39	575.59	1130.76	972.11	686.39	541.79	605.19	545.59	586.58	824.19	596.59	903.39	864.39			Y(91)	4	4	3	3	4	2	2	4	0	3	4	3
Y(92)	3	2	4	4	4	3	3	4	2	4	4	2	1	4	4	2		Z(92)	1025.96	1178.71	1002.99	573.19	576.99	1130.87	972.22	693.59	543.71	615.79	547.79	586.74	826.03	602.59	929.39	866.59			Y(92)	4	4	4	4	4	2	2	1	0	1	4	1
Y(93)	1	2	4	4	4	1	4	4	2	4	4	2	3	2	4	4		Z(93)	1026.49	1182.82	1007.19	588.19	603.59	1132.42	976.79	701.99	543.78	617.39	548.39	586.85	826.14	611.17	930.19	871.39			Y(93)	2	4	4	4	1	2	4	3	0	3	4	3
Y(94)	3	2	4	2	4	3	4	4	2	4	4	2	4	2	4	4		Z(94)	1026.6	1185.71	1009.79	591.58	645.19	1132.53	995.79	711.39	543.85	640.19	550.79	587.77	830.79	614.93	956.99	872.19			Y(94)	4	4	4	4	3	2	4	4	0	1	4	4
Y(95)	4	2	4	2	4	4	4	4	2	4	4	1	4	2	4	4		Z(95)	1029.79	1190.68	1024.99	612.76	650.79	1135.99	1022.99	713.59	545.51	643.39	559.99	614.52	845.99	618.29	963.99	881.79			Y(95)	4	1	4	1	1	2	4	1	0	3	4	4
Y(96)	4	2	4	4	4	4	4	4	2	1	4	3	4	2	4	2		Z(96)	1122.59	1191.79	1031.99	620.99	654.19	1147.99	1023.79	739.59	547.85	646.21	561.79	614.63	861.39	618.43	972.99	884.01			Y(96)	4	3	4	3	3	2	1	3	0	1	4	4
Y(97)	4	2	4	4	4	4	4	4	4	3	4	1	4	4	4	2		Z(97)	1127.79	1193.3	1033.39	622.79	660.79	1161.59	1024.39	739.99	566.59	646.32	565.19	615	864.39	621.59	975.39	884.58			Y(97)	4	4	2	4	4	2	3	4	0	3	4	4
Y(98)	1	2	4	2	4	4	4	4	1	1	2	3	2	2	4	4		Z(98)	1137.33	1193.81	1037.19	635.24	662.19	1172.19	1025.39	743.19	572.76	648.02	572.91	615.11	879.83	623.87	976.79	885.99			Y(98)	1	4	2	4	4	4	1	4	0	4	1	4
Y(99)	3	2	4	2	4	4	4	4	3	3	4	1	2	2	4	4		Z(99)	1137.44	1196.63	1039.79	637.82	669.59	1172.99	1025.79	753.39	572.87	648.13	580.19	616.25	883.15	625.17	993.79	888.59			Y(99)	3	4	4	4	4	4	3	4	0	4	3	4
Y(100)	1	2	4	4	4	4	4	4	1	1	4	3	2	2	4	2		Z(100)	1137.87	1196.71	1051.19	639.79	725.79	1185.39	1026.39	772.79	574.87	648.34	581.39	616.36	884.15	625.34	995.79	889.95			Y(100)	4	1	1	4	4	4	4	4	0	4	1	4
Y(101)	3	2	4	4	4	1	4	4	3	3	4	1	2	4	4	2		Z(101)	1137.98	1196.77	1052.59	644.39	757.99	1240.43	1034.99	777.59	574.98	648.45	586.99	616.58	884.28	646.39	1001.99	893.45			Y(101)	1	3	3	4	4	1	4	1	0	4	3	1
Y(102)	1	2	4	4	4	3	1	4	1	1	4	3	4	4	4	2		Z(102)	1138.16	1198.61	1057.79	649.99	762.79	1240.54	1044.5	777.99	576.72	649.17	591.59	616.69	887.59	726.39	1066.99	897.81			Y(102)	3	4	1	1	4	3	4	3	0	4	4	3
Y(103)	3	2	4	4	4	1	3	4	3	3	4	1	4	4	4	2		Z(103)	1138.27	1199.93	1066.39	652.19	773.19	1240.65	1044.61	781.99	576.83	649.28	594.39	617.08	898.99	730.19	1068.59	902.94			Y(103)	4	4	3	3	4	1	4	4	0	4	4	1
Y(104)	0	4	4	4	4	3	1	4	1	4	4	3	4	4	4	2		Z(104)	0	1202.39	1085.99	653.59	775.79	1240.76	1045.02	786.79	577.47	652.39	605.39	617.19	905.39	734.59	1070.99	903.46			Y(104)	4	4	4	1	4	3	4	4	0	4	4	3
Y(105)	0	4	4	4	2	1	3	4	3	4	4	1	4	4	4	2		Z(105)	0	1248.79	1088.59	656.59	790.26	1241.06	1045.13	788.19	577.58	656.39	621.79	617.5	905.99	738.99	1072.19	904.99			Y(105)	4	4	4	3	4	4	4	1	0	1	1	4
Y(106)	0	2	4	4	4	3	4	1	4	4	4	3	1	4	4	2		Z(106)	0	1253.96	1097.39	660.19	800.79	1241.17	1051.79	811.26	580.59	664.79	622.99	617.61	908.54	740.39	1073.99	905.96			Y(106)	4	4	4	4	4	4	1	3	0	3	3	4
Y(107)	0	2	4	4	4	1	4	3	4	4	4	1	3	4	4	2		Z(107)	0	1255.94	1107.79	663.19	806.59	1241.61	1063.59	811.37	586.79	676.19	626.39	617.95	908.65	740.79	1075.39	907.02			Y(107)	4	1	4	4	1	4	3	4	0	4	4	4
Y(108)	0	4	4	4	4	3	4	1	4	4	4	3	1	4	4	4		Z(108)	0	1280.39	1121.99	663.79	807.19	1241.72	1073.39	813.01	594.79	676.79	633.79	618.06	909.37	743.79	1075.79	909.99			Y(108)	4	3	2	4	3	4	4	4	0	1	4	4
Y(109)	0	4	4	4	4	0	4	3	4	4	4	1	3	4	4	4		Z(109)	0	1284.99	1147.79	665.59	807.79	0	1107.79	813.12	603.99	685.39	635.79	619.43	909.48	745.59	1079.19	920.59			Y(109)	4	4	4	4	4	4	4	1	0	3	4	4
Y(110)	0	1	4	1	4	0	1	1	4	4	4	3	4	4	4	4		Z(110)	0	1298.94	1152.59	667.74	808.99	0	1121.39	816.82	611.79	686.79	645.79	619.54	912.19	750.39	1081.79	925.39			Y(110)	4	4	4	1	4	2	4	3	0	1	4	1
Y(111)	0	3	4	3	4	0	3	3	4	4	4	1	4	4	4	4		Z(111)	0	1299.05	1155.19	667.85	812.59	0	1121.5	816.93	618.79	687.59	648.39	620.65	920.79	752.39	1082.39	928.39			Y(111)	4	1	4	3	4	4	4	4	0	3	1	3
Y(112)	0	4	4	1	4	0	2	1	4	4	1	3	4	4	1	4		Z(112)	0	1304.19	1237.19	670.86	812.99	0	1129.9	817.06	631.19	689.99	651.7	620.76	928.79	753.39	1086.37	997.19			Y(112)	4	3	4	4	4	4	4	4	0	1	3	1
Y(113)	0	4	4	3	4	0	2	3	2	4	3	4	4	4	3	4		Z(113)	0	1313.79	1238.19	670.97	814.79	0	1131.73	817.17	634.65	691.39	651.81	621.99	936.59	758.99	1086.48	1003.99			Y(113)	4	4	4	4	1	4	4	4	0	3	4	3
Y(114)	0	4	4	1	4	0	2	4	2	4	1	4	4	4	1	4		Z(114)	0	1378.99	1255.99	671.41	817.39	0	1131.85	822.59	634.8	696.99	652.34	629.79	948.39	760.19	1087.08	1044.19			Y(114)	4	4	1	4	3	2	4	4	0	4	4	4
Y(115)	0	4	2	3	4	0	2	4	4	4	3	4	4	2	3	2		Z(115)	0	1384.39	1261.66	671.52	817.79	0	1134.31	828.39	655.59	698.19	652.45	640.99	956.19	762.04	1087.19	1152.39			Y(115)	4	4	3	2	4	4	4	4	0	4	4	4
Y(116)	0	4	2	1	4	0	2	4	4	4	4	4	4	2	1	2		Z(116)	0	1423.79	1263.84	674.76	820.39	0	1134.84	837.39	658.79	700.99	659.39	650.59	965.39	764.48	1088.21	1152.62			Y(116)	4	1	1	2	4	4	4	4	0	4	4	4
Y(117)	0	4	2	3	4	0	2	4	1	4	4	4	4	2	3	2		Z(117)	0	1424.59	1264	674.87	823.99	0	1135.54	848.39	661.25	702.79	666.59	661.39	966.59	766.43	1088.32	1162.49			Y(117)	4	3	3	2	2	4	4	4	0	4	1	4
Y(118)	0	4	4	1	4	0	2	4	3	1	4	4	4	2	1	4		Z(118)	0	1448.59	1266.59	675.4	827.39	0	1146.33	871.19	661.36	706.66	666.99	671.39	966.99	770.21	1089.15	1169.79			Y(118)	4	0	1	2	2	4	4	2	0	4	3	4
Y(119)	0	4	1	3	4	0	2	4	1	3	4	4	4	2	3	1		Z(119)	0	1449.99	1270.76	675.51	892.59	0	1157.5	872.99	662.27	706.77	667.39	681.79	969.79	771.11	1089.26	1177.05			Y(119)	4	0	3	4	2	4	4	1	0	4	1	1
Y(120)	0	4	3	1	4	0	2	4	3	1	4	4	4	2	1	3		Z(120)	0	1456.79	1270.87	686.83	896.39	0	1157.76	903.79	662.38	707.22	678.59	692.79	974.19	774.03	1089.42	1177.16			Y(120)	4	0	1	4	2	4	1	3	0	4	3	3
Y(121)	0	4	1	3	4	0	2	1	0	3	4	4	4	2	3	4		Z(121)	0	1457.59	1276.08	686.94	952.99	0	1159	911.06	0	707.33	678.99	711.59	982.99	774.19	1089.53	1184.79			Y(121)	4	0	3	4	4	4	3	0	0	4	4	1
Y(122)	0	4	3	4	4	0	2	3	0	1	4	4	2	2	1	4		Z(122)	0	1464.59	1276.19	691.39	959.59	0	1160.57	911.17	0	707.51	681.59	723.39	990.37	774.85	1090.61	1212.59			Y(122)	4	0	4	4	4	4	1	0	0	4	4	3
Y(123)	0	4	4	4	4	0	2	1	0	3	4	4	2	2	3	4		Z(123)	0	1465.19	1278.99	698.39	961.19	0	1164.55	912.35	0	707.62	683.79	724.99	990.57	775	1090.72	1238.59			Y(123)	4	0	4	4	1	1	3	0	0	4	4	0
Y(124)	0	4	4	4	4	0	2	3	0	4	4	4	4	1	1	4		Z(124)	0	1468.59	1287.79	706.79	963.39	0	1168.65	912.46	0	712.79	688.99	725.99	993.99	787.94	1092.27	1241.39			Y(124)	4	0	4	4	3	3	1	0	0	4	1	0
Y(125)	0	4	4	4	4	0	2	1	0	4	4	4	4	3	3	4		Z(125)	0	1470.39	1300.59	707.19	968.39	0	1171.95	915.61	0	717.79	690.59	727.99	1012.79	788.05	1092.38	1243.39			Y(125)	2	0	4	1	4	4	3	0	0	4	3	0
Y(126)	0	4	4	4	1	0	4	3	0	4	4	4	4	1	4	4		Z(126)	0	1497.99	1300.99	715.59	973.11	0	1178.59	915.72	0	724.79	694.59	730.59	1027.39	788.97	1097.79	1245.59			Y(126)	2	0	4	3	4	4	1	0	0	1	4	0
Y(127)	0	4	4	4	3	0	2	1	0	4	4	4	4	3	4	4		Z(127)	0	1532.59	1301.79	724.99	973.22	0	1266.21	915.95	0	725.79	695.79	741.19	1041.19	789.08	1106.59	1246.59			Y(127)	2	0	4	4	1	2	3	0	0	3	4	0
Y(128)	0	4	4	4	4	0	4	3	0	4	4	4	4	1	4	4		Z(128)	0	1544.79	1303.39	733.99	975.79	0	1278.19	916.06	0	734.59	698.99	814.19	1045.99	789.28	1113.39	1254.19			Y(128)	2	0	4	4	3	1	1	0	0	1	4	0
Y(129)	0	4	4	4	4	0	1	1	0	4	4	4	4	3	4	1		Z(129)	0	1555.39	1304.99	734.99	988.79	0	1325.72	919.27	0	735.99	699.99	816.99	1049.99	789.39	1122.59	1331.41			Y(129)	2	0	4	4	4	3	3	0	0	3	4	0
Y(130)	0	4	4	4	4	0	3	3	0	4	4	4	4	4	4	3		Z(130)	0	1561.19	1307.19	773.59	990.39	0	1325.83	919.38	0	737.59	706.59	823.19	1055.99	793.59	1130.59	1331.52			Y(130)	2	0	4	4	1	4	4	0	0	0	4	0
Y(131)	0	4	4	4	4	0	1	4	0	4	4	4	4	4	4	1		Z(131)	0	1600.59	1313.99	789.79	991.99	0	1331.63	921.99	0	739.39	715.19	848.59	1071.39	800.99	1138.19	1331.65			Y(131)	2	0	2	1	3	4	4	0	0	0	4	0
Y(132)	0	4	4	4	4	0	3	4	0	4	4	4	4	4	4	3		Z(132)	0	1601.39	1319.99	795.19	993.59	0	1331.74	928.39	0	741.19	717.99	862.99	1075.59	811.39	1139.19	1331.76			Y(132)	2	0	4	3	4	1	4	0	0	0	1	0
Y(133)	0	4	4	4	4	0	1	4	0	4	4	4	4	4	4	1		Z(133)	0	1605.79	1344.19	809.59	994.79	0	1335.76	936.59	0	742.39	724.79	863.59	1080.99	825.59	1140.99	1334			Y(133)	2	0	1	1	4	3	4	0	0	0	3	0
Y(134)	0	4	4	4	4	0	3	4	0	4	4	4	2	4	4	3		Z(134)	0	1627.19	1348.79	817.39	997.19	0	1335.87	945.99	0	743.19	728.39	866.19	1098.06	831.59	1154.59	1334.11			Y(134)	1	0	3	3	1	4	4	0	0	0	4	0
Y(135)	0	4	4	4	4	0	1	4	0	4	4	4	2	4	4	1		Z(135)	0	1631.39	1349.99	819.39	1017.59	0	1338.96	956.19	0	745.99	730.79	921.79	1105.35	835.19	1163.39	1334.94			Y(135)	3	0	4	0	3	4	4	0	0	0	4	0
Y(136)	0	4	4	4	4	0	3	4	0	4	4	4	2	4	4	3		Z(136)	0	1662.39	1352.99	863.59	1019.59	0	1339.07	980.39	0	749.39	733.99	1022.19	1105.54	842.39	1167.39	1335.05			Y(136)	1	0	4	0	1	2	4	0	0	0	1	0
Y(137)	0	4	4	4	4	0	0	4	0	4	4	2	2	4	4	1		Z(137)	0	1667.39	1355.99	864.59	1020.79	0	0	982.99	0	750.19	740.99	1034.49	1107.87	846.99	1176.39	1338.65			Y(137)	3	0	4	0	3	4	4	0	0	0	3	0
Y(138)	0	4	4	4	4	0	0	4	0	4	4	2	4	4	4	3		Z(138)	0	1671.59	1364.39	883.19	1022.59	0	0	994.19	0	750.59	755.19	1047.55	1118.99	892.79	1179.19	1338.76			Y(138)	4	0	4	0	4	4	2	0	0	0	0	0
Y(139)	0	4	4	4	4	0	0	4	0	4	4	2	4	4	4	1		Z(139)	0	1676.79	1390.39	883.99	1024.19	0	0	1013.39	0	751.99	756.19	1049.44	1122.79	896.99	1180.19	1339.31			Y(139)	4	0	4	0	4	2	2	0	0	0	0	0
Y(140)	0	1	4	4	4	0	0	4	0	4	4	2	4	4	4	3		Z(140)	0	1682.29	1395.39	887.79	1026.19	0	0	1013.99	0	752.99	763.19	1085.16	1146.59	897.59	1185.99	1339.42			Y(140)	4	0	2	0	1	2	2	0	0	0	0	0
Y(141)	0	3	4	1	4	0	0	4	0	1	4	2	4	4	4	1		Z(141)	0	1682.4	1401.99	900.23	1027.79	0	0	1025.99	0	756.34	765.79	1087.07	1150.59	925.19	1187.99	1341.1			Y(141)	4	0	4	0	3	2	2	0	0	0	0	0
Y(142)	0	1	4	3	4	0	0	2	0	3	4	2	4	4	4	3		Z(142)	0	1682.68	1565.99	900.34	1029.99	0	0	1035.88	0	756.45	766.19	1090.11	1157.79	928.19	1190.19	1341.21			Y(142)	2	0	4	0	4	1	2	0	0	0	0	0
Y(143)	0	3	4	4	4	0	0	2	0	1	4	2	4	4	4	1		Z(143)	0	1682.79	1617.39	903.39	1032.79	0	0	1036.94	0	756.6	768.79	1090.24	1160.19	939.79	1193.19	1341.74			Y(143)	4	0	4	0	4	3	2	0	0	0	0	0
Y(144)	0	1	4	4	4	0	0	2	0	3	4	2	4	4	4	3		Z(144)	0	1684.01	1638.99	914.39	1033.59	0	0	1047.96	0	756.71	769.59	1092.41	1168.39	946.79	1195.79	1341.85			Y(144)	4	0	2	0	1	4	2	0	0	0	0	0
Y(145)	0	3	2	4	4	0	0	2	0	1	4	2	4	4	4	1		Z(145)	0	1684.12	1663.06	919.39	1036.59	0	0	1048.57	0	757.02	770.19	1094.02	1168.99	950.19	1196.39	1346.07			Y(145)	4	0	2	0	3	4	2	0	0	0	0	0
Y(146)	0	1	4	4	4	0	0	2	0	3	4	2	1	4	2	3		Z(146)	0	1687.23	1664.99	947.39	1037.79	0	0	1048.72	0	757.13	782.19	1096.15	1177.5	951.99	1198.45	1346.18			Y(146)	4	0	2	0	4	4	2	0	0	0	0	0
Y(147)	0	3	4	4	4	0	0	2	0	1	4	2	3	4	2	1		Z(147)	0	1687.34	1666.39	952.39	1041.39	0	0	1048.94	0	757.36	784.99	1096.24	1177.61	954.79	1199.78	1346.5			Y(147)	1	0	2	0	4	1	4	0	0	0	0	0
Y(148)	0	1	1	4	4	0	0	2	0	3	4	2	1	4	2	3		Z(148)	0	1689.99	1668.85	962.99	1041.99	0	0	1049.71	0	757.47	793.59	1096.3	1182.78	957.99	1200.03	1346.61			Y(148)	3	0	4	0	1	3	1	0	0	0	0	0
Y(149)	0	3	3	4	4	0	0	2	0	1	1	2	3	4	2	4		Z(149)	0	1690.1	1668.96	967.59	1043.19	0	0	1050.04	0	757.64	798.22	1096.33	1182.89	959.99	1223.22	1352.59			Y(149)	4	0	1	0	3	4	3	0	0	0	0	0
Y(150)	0	4	1	4	4	0	0	2	0	3	3	2	1	4	2	4		Z(150)	0	1692.79	1669.95	992.19	1044.79	0	0	1052.05	0	757.75	798.33	1098.01	1183.09	964.59	1223.89	1357.59			Y(150)	4	0	3	0	4	1	1	0	0	0	0	0
Y(151)	0	4	3	4	4	0	0	2	0	1	4	2	3	4	2	4		Z(151)	0	1702.79	1670.06	1020.59	1055.59	0	0	1052.27	0	759.27	802.39	1098.39	1183.2	964.99	1226.83	1366.59			Y(151)	4	0	4	0	1	3	3	0	0	0	0	0
Y(152)	0	4	1	4	4	0	0	2	0	3	4	2	4	4	2	4		Z(152)	0	1711.79	1674.46	1041.39	1057.59	0	0	1052.88	0	759.38	814.79	1098.7	1186.79	965.39	1226.98	1369.99			Y(152)	1	0	4	0	3	4	0	0	0	0	0	0
Y(153)	0	4	3	4	4	0	0	4	0	1	4	2	4	4	1	4		Z(153)	0	1720.19	1674.57	1046.59	1059.19	0	0	1065.39	0	760.84	819.19	1099.38	1194.79	965.99	1234.99	1377.99			Y(153)	3	0	4	0	4	4	0	0	0	0	0	0
Y(154)	0	4	1	4	4	0	0	4	0	3	4	2	4	4	3	4		Z(154)	0	1730.39	1680.66	1052.79	1059.79	0	0	1079.39	0	760.95	820.59	1101.05	1203.99	966.39	1235.1	1385.79			Y(154)	4	0	4	0	4	4	0	0	0	0	0	0
Y(155)	0	4	3	4	4	0	0	2	0	0	4	2	4	4	1	4		Z(155)	0	1733.59	1680.77	1055.99	1062.19	0	0	1088.53	0	0	845.79	1101.17	1212.99	969.59	1236.38	1396.19			Y(155)	4	0	4	0	1	2	0	0	0	0	0	0
Y(156)	0	4	1	4	4	0	0	2	0	0	4	2	4	4	3	4		Z(156)	0	1756.99	1681.19	1056.99	1065.59	0	0	1090.54	0	0	846.99	1103.05	1215.39	978.79	1236.49	1407.39			Y(156)	4	0	4	0	3	1	0	0	0	0	0	0
Y(157)	0	0	3	2	4	0	0	4	0	0	4	2	4	4	1	4		Z(157)	0	0	1681.3	1060.24	1066.19	0	0	1097.79	0	0	855.19	1103.71	1222.19	979.59	1237.92	1416.99			Y(157)	4	0	4	0	0	3	0	0	0	0	0	0
Y(158)	0	0	4	1	4	0	0	1	0	0	4	2	4	1	3	4		Z(158)	0	0	1684.39	1067.45	1067.39	0	0	1101.94	0	0	859.19	1103.84	1229.19	981.9	1238.03	1428.59			Y(158)	4	0	4	0	0	4	0	0	0	0	0	0
Y(159)	0	0	4	3	4	0	0	3	0	0	4	2	4	3	1	4		Z(159)	0	0	1693.99	1067.56	1068.39	0	0	1102.05	0	0	861.59	1104.1	1238.19	982.01	1240.28	1439.19			Y(159)	1	0	4	0	0	1	0	0	0	0	0	0
Y(160)	0	0	4	4	4	0	0	0	0	0	4	2	4	4	3	4		Z(160)	0	0	1703.19	1072.99	1069.79	0	0	0	0	0	863.59	1106.5	1258.39	984.99	1240.39	1458.79			Y(160)	3	0	1	0	0	3	0	0	0	0	0	0
Y(161)	0	0	4	4	4	0	0	0	0	0	2	2	4	4	4	4		Z(161)	0	0	1710.99	1089.99	1075.59	0	0	0	0	0	866.95	1106.55	1261.99	992.79	1244.39	1468.99			Y(161)	1	0	3	0	0	0	0	0	0	0	0	0
Y(162)	0	0	4	4	4	0	0	0	0	0	2	2	2	4	4	4		Z(162)	0	0	1711.59	1115.19	1076.99	0	0	0	0	0	867.19	1109.17	1264.62	997.59	1252.19	1470.99			Y(162)	3	0	1	0	0	0	0	0	0	0	0	0
Y(163)	0	0	4	4	4	0	0	0	0	0	2	2	4	4	4	4		Z(163)	0	0	1721.99	1121.39	1079.39	0	0	0	0	0	867.35	1110.67	1288.79	1012.19	1261.19	1475.59			Y(163)	4	0	3	0	0	0	0	0	0	0	0	0
Y(164)	0	0	4	4	1	0	0	0	0	0	2	4	4	4	4	4		Z(164)	0	0	1754.19	1135.19	1081.97	0	0	0	0	0	867.74	1141.19	1291.99	1078.79	1270.79	1476.59			Y(164)	4	0	0	0	0	0	0	0	0	0	0	0
Y(165)	0	0	4	4	3	0	0	0	0	0	2	4	4	1	4	4		Z(165)	0	0	1768.59	1143.19	1082.08	0	0	0	0	0	867.95	1141.79	1295.99	1095.05	1280.79	1497.19			Y(165)	4	0	0	0	0	0	0	0	0	0	0	0
Y(166)	0	0	0	4	4	0	0	0	0	0	4	1	4	3	4	4		Z(166)	0	0	0	1143.79	1087.79	0	0	0	0	0	871.79	1155.86	1300.99	1095.16	1282.79	1499.19			Y(166)	4	0	0	0	0	0	0	0	0	0	0	0
Y(167)	0	0	0	4	4	0	0	0	0	0	4	3	1	1	4	4		Z(167)	0	0	0	1182.99	1097.99	0	0	0	0	0	872.19	1155.97	1307.66	1097.36	1288.99	1503.59			Y(167)	4	0	0	0	0	0	0	0	0	0	0	0
Y(168)	0	0	0	4	4	0	0	0	0	0	4	0	3	3	4	4		Z(168)	0	0	0	1185.59	1100.19	0	0	0	0	0	873.19	0	1307.77	1097.47	1291.99	1510.59			Y(168)	4	0	0	0	0	0	0	0	0	0	0	0
Y(169)	0	0	0	4	4	0	0	0	0	0	4	0	4	1	1	4		Z(169)	0	0	0	1198.59	1104.19	0	0	0	0	0	874.59	0	1310.99	1099.23	1304.37	1512.19			Y(169)	4	0	0	0	0	0	0	0	0	0	0	0
Y(170)	0	0	0	4	4	0	0	0	0	0	4	0	4	3	3	4		Z(170)	0	0	0	1207.79	1107.39	0	0	0	0	0	876.39	0	1326.39	1099.34	1304.48	1558.19			Y(170)	4	0	0	0	0	0	0	0	0	0	0	0
Y(171)	0	0	0	4	4	0	0	0	0	0	4	0	4	1	1	4		Z(171)	0	0	0	1218.79	1112.19	0	0	0	0	0	879.59	0	1346.59	1101.52	1306.82	1561.59			Y(171)	4	0	0	0	0	0	0	0	0	0	0	0
Y(172)	0	0	0	4	4	0	0	0	0	0	4	0	4	3	3	4		Z(172)	0	0	0	1222.39	1114.59	0	0	0	0	0	885.79	0	1356.39	1101.63	1306.93	1567.59			Y(172)	1	0	0	0	0	0	0	0	0	0	0	0
Y(173)	0	0	0	4	4	0	0	0	0	0	4	0	4	1	1	1		Z(173)	0	0	0	1228.59	1131.19	0	0	0	0	0	887.39	0	1362.59	1104.18	1308.83	1577.36			Y(173)	3	0	0	0	0	0	0	0	0	0	0	0
Y(174)	0	0	0	4	4	0	0	0	0	0	2	0	4	3	3	3		Z(174)	0	0	0	1235.99	1132.19	0	0	0	0	0	890.39	0	1366.79	1104.29	1308.94	1577.47			Y(174)	4	0	0	0	0	0	0	0	0	0	0	0
Y(175)	0	0	0	4	4	0	0	0	0	0	2	0	4	4	1	4		Z(175)	0	0	0	1257.39	1133.59	0	0	0	0	0	890.5	0	1367.19	1107.99	1309.27	1582.79			Y(175)	4	0	0	0	0	0	0	0	0	0	0	0
Y(176)	0	0	0	4	4	0	0	0	0	0	2	0	1	4	3	4		Z(176)	0	0	0	1260.39	1136.79	0	0	0	0	0	890.67	0	1370.05	1116.19	1309.38	1600.39			Y(176)	4	0	0	0	0	0	0	0	0	0	0	0
Y(177)	0	0	0	4	4	0	0	0	0	0	4	0	3	4	1	2		Z(177)	0	0	0	1265.39	1141.19	0	0	0	0	0	901.39	0	1370.16	1126.79	1311.29	1609.97			Y(177)	4	0	0	0	0	0	0	0	0	0	0	0
Y(178)	0	0	0	4	4	0	0	0	0	0	1	0	1	4	3	4		Z(178)	0	0	0	1271.79	1143.19	0	0	0	0	0	903.29	0	1370.33	1142.19	1311.4	1639.59			Y(178)	4	0	0	0	0	0	0	0	0	0	0	0
Y(179)	0	0	0	4	4	0	0	0	0	0	3	0	3	4	4	2		Z(179)	0	0	0	1279.79	1146.99	0	0	0	0	0	903.4	0	1370.44	1156.59	1314.59	1643.56			Y(179)	4	0	0	0	0	0	0	0	0	0	0	0
Y(180)	0	0	0	1	4	0	0	0	0	0	1	0	1	4	4	2		Z(180)	0	0	0	1281.91	1147.59	0	0	0	0	0	903.77	0	1370.62	1172.19	1320.99	1646.67			Y(180)	4	0	0	0	0	0	0	0	0	0	0	0
Y(181)	0	0	0	3	4	0	0	0	0	0	3	0	3	4	4	2		Z(181)	0	0	0	1282.02	1148.39	0	0	0	0	0	903.88	0	1370.73	1180.39	1321.79	1647.43			Y(181)	4	0	0	0	0	0	0	0	0	0	0	0
Y(182)	0	0	0	1	4	0	0	0	0	0	1	0	1	4	4	2		Z(182)	0	0	0	1284.86	1150.79	0	0	0	0	0	905.47	0	1377.38	1181.59	1329.59	1647.51			Y(182)	4	0	0	0	0	0	0	0	0	0	0	0
Y(183)	0	0	0	3	4	0	0	0	0	0	3	0	3	4	4	2		Z(183)	0	0	0	1284.97	1152.19	0	0	0	0	0	905.58	0	1377.49	1190.59	1338.39	1648.59			Y(183)	2	0	0	0	0	0	0	0	0	0	0	0
Y(184)	0	0	0	0	4	0	0	0	0	0	4	0	4	4	4	4		Z(184)	0	0	0	0	1153.59	0	0	0	0	0	907.59	0	1380.19	1195.39	1347.79	1653.79			Y(184)	1	0	0	0	0	0	0	0	0	0	0	0
Y(185)	0	0	0	0	4	0	0	0	0	0	4	0	4	4	4	2		Z(185)	0	0	0	0	1156.79	0	0	0	0	0	914.79	0	1385.99	1198.39	1370.19	1655.5			Y(185)	3	0	0	0	0	0	0	0	0	0	0	0
Y(186)	0	0	0	0	4	0	0	0	0	0	4	0	4	4	1	2		Z(186)	0	0	0	0	1158.19	0	0	0	0	0	915.19	0	1396.39	1199.59	1377.53	1655.56			Y(186)	1	0	0	0	0	0	0	0	0	0	0	0
Y(187)	0	0	0	0	4	0	0	0	0	0	4	0	4	4	3	2		Z(187)	0	0	0	0	1162.19	0	0	0	0	0	926.19	0	1405.59	1204.19	1377.64	1660.34			Y(187)	3	0	0	0	0	0	0	0	0	0	0	0
Y(188)	0	0	0	0	4	0	0	0	0	0	4	0	4	4	0	4		Z(188)	0	0	0	0	1166.79	0	0	0	0	0	939.19	0	1416.79	1209.19	0	1680.59			Y(188)	1	0	0	0	0	0	0	0	0	0	0	0
Y(189)	0	0	0	0	4	0	0	0	0	0	4	0	4	4	0	1		Z(189)	0	0	0	0	1169.39	0	0	0	0	0	939.99	0	1419.39	1209.79	0	1683.1			Y(189)	3	0	0	0	0	0	0	0	0	0	0	0
Y(190)	0	0	0	0	4	0	0	0	0	0	4	0	4	1	0	3		Z(190)	0	0	0	0	1170.39	0	0	0	0	0	946.59	0	1420.99	1211.04	0	1683.21
Y(191)	0	0	0	0	4	0	0	0	0	0	4	0	4	3	0	1		Z(191)	0	0	0	0	1172.19	0	0	0	0	0	956.19	0	1425.99	1211.15	0	1684.42
Y(192)	0	0	0	0	4	0	0	0	0	0	4	0	4	1	0	3		Z(192)	0	0	0	0	1175.99	0	0	0	0	0	957.99	0	1432.59	1212.1	0	1684.53
Y(193)	0	0	0	0	4	0	0	0	0	0	4	0	4	3	0	1		Z(193)	0	0	0	0	1176.79	0	0	0	0	0	961.59	0	1443.39	1212.21	0	1685.15
Y(194)	0	0	0	0	4	0	0	0	0	0	4	0	4	4	0	3		Z(194)	0	0	0	0	1178.19	0	0	0	0	0	966.99	0	1449.39	1215.39	0	1685.26
Y(195)	0	0	0	0	4	0	0	0	0	0	4	0	4	4	0	1		Z(195)	0	0	0	0	1181.59	0	0	0	0	0	967.59	0	1476.99	1221.59	0	1689.51
Y(196)	0	0	0	0	4	0	0	0	0	0	4	0	4	4	0	3		Z(196)	0	0	0	0	1183.59	0	0	0	0	0	973.59	0	1511.79	1224.39	0	1689.62
Y(197)	0	0	0	0	4	0	0	0	0	0	4	0	4	4	0	0		Z(197)	0	0	0	0	1183.99	0	0	0	0	0	978.39	0	1514.99	1225.79	0	0
Y(198)	0	0	0	0	4	0	0	0	0	0	1	0	2	4	0	0		Z(198)	0	0	0	0	1185.39	0	0	0	0	0	981.25	0	1543.95	1227.39	0	0
Y(199)	0	0	0	0	4	0	0	0	0	0	3	0	2	4	0	0		Z(199)	0	0	0	0	1187.99	0	0	0	0	0	981.36	0	1544.92	1229.19	0	0
Y(200)	0	0	0	0	4	0	0	0	0	0	1	0	2	4	0	0		Z(200)	0	0	0	0	1191.19	0	0	0	0	0	981.48	0	1545.02	1232.19	0	0
Y(201)	0	0	0	0	4	0	0	0	0	0	3	0	2	4	0	0		Z(201)	0	0	0	0	1191.99	0	0	0	0	0	981.59	0	1546.27	1233.99	0	0
Y(202)	0	0	0	0	4	0	0	0	0	0	1	0	2	4	0	0		Z(202)	0	0	0	0	1194.79	0	0	0	0	0	981.91	0	1546.84	1235.79	0	0
Y(203)	0	0	0	0	2	0	0	0	0	0	3	0	4	4	0	0		Z(203)	0	0	0	0	1197.36	0	0	0	0	0	982.02	0	1554.19	1238.19	0	0
Y(204)	0	0	0	0	2	0	0	0	0	0	1	0	2	4	0	0		Z(204)	0	0	0	0	1198.32	0	0	0	0	0	984.19	0	1567.99	1243.19	0	0
Y(205)	0	0	0	0	4	0	0	0	0	0	3	0	2	4	0	0		Z(205)	0	0	0	0	1201.59	0	0	0	0	0	984.3	0	1568.73	1245.79	0	0
Y(206)	0	0	0	0	4	0	0	0	0	0	4	0	4	4	0	0		Z(206)	0	0	0	0	1205.79	0	0	0	0	0	987.99	0	1595.39	1246.79	0	0
Y(207)	0	0	0	0	4	0	0	0	0	0	4	0	4	4	0	0		Z(207)	0	0	0	0	1206.79	0	0	0	0	0	995.99	0	1601.39	1247.19	0	0
Y(208)	0	0	0	0	4	0	0	0	0	0	4	0	1	4	0	0		Z(208)	0	0	0	0	1208.39	0	0	0	0	0	1005.79	0	1616.96	1248.39	0	0
Y(209)	0	0	0	0	4	0	0	0	0	0	4	0	3	4	0	0		Z(209)	0	0	0	0	1209.19	0	0	0	0	0	1020.79	0	1617.07	1248.79	0	0
Y(210)	0	0	0	0	4	0	0	0	0	0	4	0	0	4	0	0		Z(210)	0	0	0	0	1210.39	0	0	0	0	0	1021.19	0	0	1306.19	0	0
Y(211)	0	0	0	0	4	0	0	0	0	0	4	0	0	4	0	0		Z(211)	0	0	0	0	1212.79	0	0	0	0	0	1037.39	0	0	1310.59	0	0
Y(212)	0	0	0	0	4	0	0	0	0	0	4	0	0	4	0	0		Z(212)	0	0	0	0	1214.39	0	0	0	0	0	1047.59	0	0	1338.19	0	0
Y(213)	0	0	0	0	2	0	0	0	0	0	4	0	0	4	0	0		Z(213)	0	0	0	0	1215.53	0	0	0	0	0	1055.99	0	0	1341.59	0	0
Y(214)	0	0	0	0	4	0	0	0	0	0	4	0	0	4	0	0		Z(214)	0	0	0	0	1217.59	0	0	0	0	0	1059.59	0	0	1380.99	0	0
Y(215)	0	0	0	0	4	0	0	0	0	0	4	0	0	4	0	0		Z(215)	0	0	0	0	1218.19	0	0	0	0	0	1072.39	0	0	1385.79	0	0
Y(216)	0	0	0	0	4	0	0	0	0	0	4	0	0	1	0	0		Z(216)	0	0	0	0	1221.79	0	0	0	0	0	1073.79	0	0	1387.65	0	0
Y(217)	0	0	0	0	4	0	0	0	0	0	4	0	0	3	0	0		Z(217)	0	0	0	0	1223.99	0	0	0	0	0	1074.39	0	0	1387.76	0	0
Y(218)	0	0	0	0	4	0	0	0	0	0	4	0	0	4	0	0		Z(218)	0	0	0	0	1226.59	0	0	0	0	0	1074.79	0	0	1390.39	0	0
Y(219)	0	0	0	0	2	0	0	0	0	0	4	0	0	4	0	0		Z(219)	0	0	0	0	1231.59	0	0	0	0	0	1075.99	0	0	1397.59	0	0
Y(220)	0	0	0	0	4	0	0	0	0	0	4	0	0	4	0	0		Z(220)	0	0	0	0	1235.19	0	0	0	0	0	1078.39	0	0	1399.19	0	0
Y(221)	0	0	0	0	4	0	0	0	0	0	4	0	0	4	0	0		Z(221)	0	0	0	0	1236.39	0	0	0	0	0	1080.19	0	0	1402.59	0	0
Y(222)	0	0	0	0	4	0	0	0	0	0	4	0	0	4	0	0		Z(222)	0	0	0	0	1236.99	0	0	0	0	0	1082.79	0	0	1405.79	0	0
Y(223)	0	0	0	0	4	0	0	0	0	0	2	0	0	4	0	0		Z(223)	0	0	0	0	1237.99	0	0	0	0	0	1087.36	0	0	1407.39	0	0
Y(224)	0	0	0	0	4	0	0	0	0	0	2	0	0	4	0	0		Z(224)	0	0	0	0	1241.99	0	0	0	0	0	1096.04	0	0	1411.59	0	0
Y(225)	0	0	0	0	4	0	0	0	0	0	2	0	0	4	0	0		Z(225)	0	0	0	0	1245.39	0	0	0	0	0	1097.65	0	0	1416.59	0	0
Y(226)	0	0	0	0	4	0	0	0	0	0	1	0	0	4	0	0		Z(226)	0	0	0	0	1248.79	0	0	0	0	0	1104.11	0	0	1417.19	0	0
Y(227)	0	0	0	0	4	0	0	0	0	0	3	0	0	4	0	0		Z(227)	0	0	0	0	1252.39	0	0	0	0	0	1104.22	0	0	1420.79	0	0
Y(228)	0	0	0	0	4	0	0	0	0	0	1	0	0	4	0	0		Z(228)	0	0	0	0	1252.99	0	0	0	0	0	1104.37	0	0	1441.59	0	0
Y(229)	0	0	0	0	4	0	0	0	0	0	3	0	0	4	0	0		Z(229)	0	0	0	0	1261.59	0	0	0	0	0	1104.48	0	0	1446.99	0	0
Y(230)	0	0	0	0	4	0	0	0	0	0	1	0	0	2	0	0		Z(230)	0	0	0	0	1263.39	0	0	0	0	0	1107.33	0	0	1452.4	0	0
Y(231)	0	0	0	0	4	0	0	0	0	0	3	0	0	2	0	0		Z(231)	0	0	0	0	1264.59	0	0	0	0	0	1107.44	0	0	1454.16	0	0
Y(232)	0	0	0	0	4	0	0	0	0	0	4	0	0	2	0	0		Z(232)	0	0	0	0	1265.19	0	0	0	0	0	1110.99	0	0	1455.15	0	0
Y(233)	0	0	0	0	4	0	0	0	0	0	4	0	0	2	0	0		Z(233)	0	0	0	0	1278.19	0	0	0	0	0	1119.19	0	0	1458.08	0	0
Y(234)	0	0	0	0	4	0	0	0	0	0	4	0	0	2	0	0		Z(234)	0	0	0	0	1311.99	0	0	0	0	0	1119.79	0	0	1458.19	0	0
Y(235)	0	0	0	0	4	0	0	0	0	0	4	0	0	2	0	0		Z(235)	0	0	0	0	1312.59	0	0	0	0	0	1130.39	0	0	1460.79	0	0
Y(236)	0	0	0	0	4	0	0	0	0	0	4	0	0	2	0	0		Z(236)	0	0	0	0	1313.79	0	0	0	0	0	1131.39	0	0	1462.98	0	0
Y(237)	0	0	0	0	4	0	0	0	0	0	4	0	0	2	0	0		Z(237)	0	0	0	0	1316.79	0	0	0	0	0	1131.79	0	0	1465.3	0	0
Y(238)	0	0	0	0	4	0	0	0	0	0	4	0	0	2	0	0		Z(238)	0	0	0	0	1319.39	0	0	0	0	0	1133.39	0	0	1465.41	0	0
Y(239)	0	0	0	0	4	0	0	0	0	0	4	0	0	2	0	0		Z(239)	0	0	0	0	1320.59	0	0	0	0	0	1146.59	0	0	1466.22	0	0
Y(240)	0	0	0	0	4	0	0	0	0	0	4	0	0	2	0	0		Z(240)	0	0	0	0	1323.59	0	0	0	0	0	1150.99	0	0	1471.47	0	0
Y(241)	0	0	0	0	4	0	0	0	0	0	4	0	0	2	0	0		Z(241)	0	0	0	0	1333.39	0	0	0	0	0	1182.19	0	0	1473.91	0	0
Y(242)	0	0	0	0	4	0	0	0	0	0	4	0	0	2	0	0		Z(242)	0	0	0	0	1335.39	0	0	0	0	0	1186.39	0	0	1474.02	0	0
Y(243)	0	0	0	0	4	0	0	0	0	0	4	0	0	2	0	0		Z(243)	0	0	0	0	1338.19	0	0	0	0	0	1189.19	0	0	1477.67	0	0
Y(244)	0	0	0	0	4	0	0	0	0	0	4	0	0	2	0	0		Z(244)	0	0	0	0	1339.39	0	0	0	0	0	1209.39	0	0	1478.85	0	0
Y(245)	0	0	0	0	4	0	0	0	0	0	1	0	0	2	0	0		Z(245)	0	0	0	0	1341.59	0	0	0	0	0	1211.27	0	0	1493.29	0	0
Y(246)	0	0	0	0	4	0	0	0	0	0	3	0	0	2	0	0		Z(246)	0	0	0	0	1342.59	0	0	0	0	0	1211.38	0	0	1493.38	0	0
Y(247)	0	0	0	0	4	0	0	0	0	0	4	0	0	2	0	0		Z(247)	0	0	0	0	1374.59	0	0	0	0	0	1213.79	0	0	1493.97	0	0
Y(248)	0	0	0	0	4	0	0	0	0	0	4	0	0	2	0	0		Z(248)	0	0	0	0	1377.19	0	0	0	0	0	1234.19	0	0	1494.79	0	0
Y(249)	0	0	0	0	4	0	0	0	0	0	1	0	0	2	0	0		Z(249)	0	0	0	0	1378.99	0	0	0	0	0	1245.79	0	0	1495.39	0	0
Y(250)	0	0	0	0	4	0	0	0	0	0	3	0	0	2	0	0		Z(250)	0	0	0	0	1393.59	0	0	0	0	0	1245.9	0	0	1495.52	0	0
Y(251)	0	0	0	0	4	0	0	0	0	0	0	0	0	2	0	0		Z(251)	0	0	0	0	1395.39	0	0	0	0	0	0	0	0	1496.74	0	0
Y(252)	0	0	0	0	2	0	0	0	0	0	0	0	0	2	0	0		Z(252)	0	0	0	0	1402.7	0	0	0	0	0	0	0	0	1496.86	0	0
Y(253)	0	0	0	0	4	0	0	0	0	0	0	0	0	2	0	0		Z(253)	0	0	0	0	1406.39	0	0	0	0	0	0	0	0	1497.27	0	0
Y(254)	0	0	0	0	4	0	0	0	0	0	0	0	0	2	0	0		Z(254)	0	0	0	0	1410.39	0	0	0	0	0	0	0	0	1498.45	0	0
Y(255)	0	0	0	0	4	0	0	0	0	0	0	0	0	2	0	0		Z(255)	0	0	0	0	1413.39	0	0	0	0	0	0	0	0	1499.21	0	0
Y(256)	0	0	0	0	4	0	0	0	0	0	0	0	0	2	0	0		Z(256)	0	0	0	0	1414.79	0	0	0	0	0	0	0	0	1499.35	0	0
Y(257)	0	0	0	0	4	0	0	0	0	0	0	0	0	2	0	0		Z(257)	0	0	0	0	1425.59	0	0	0	0	0	0	0	0	1500.21	0	0
Y(258)	0	0	0	0	4	0	0	0	0	0	0	0	0	2	0	0		Z(258)	0	0	0	0	1433.59	0	0	0	0	0	0	0	0	1500.35	0	0
Y(259)	0	0	0	0	4	0	0	0	0	0	0	0	0	2	0	0		Z(259)	0	0	0	0	1433.99	0	0	0	0	0	0	0	0	1500.53	0	0
Y(260)	0	0	0	0	4	0	0	0	0	0	0	0	0	2	0	0		Z(260)	0	0	0	0	1453.39	0	0	0	0	0	0	0	0	1501.2	0	0
Y(261)	0	0	0	0	4	0	0	0	0	0	0	0	0	2	0	0		Z(261)	0	0	0	0	1473.19	0	0	0	0	0	0	0	0	1502.13	0	0
Y(262)	0	0	0	0	4	0	0	0	0	0	0	0	0	2	0	0		Z(262)	0	0	0	0	1474.59	0	0	0	0	0	0	0	0	1502.69	0	0
Y(263)	0	0	0	0	4	0	0	0	0	0	0	0	0	2	0	0		Z(263)	0	0	0	0	1483.59	0	0	0	0	0	0	0	0	1509.93	0	0
Y(264)	0	0	0	0	4	0	0	0	0	0	0	0	0	2	0	0		Z(264)	0	0	0	0	1484.19	0	0	0	0	0	0	0	0	1510.07	0	0
Y(265)	0	0	0	0	4	0	0	0	0	0	0	0	0	2	0	0		Z(265)	0	0	0	0	1488.79	0	0	0	0	0	0	0	0	1510.92	0	0
Y(266)	0	0	0	0	4	0	0	0	0	0	0	0	0	2	0	0		Z(266)	0	0	0	0	1489.39	0	0	0	0	0	0	0	0	1513.16	0	0
Y(267)	0	0	0	0	4	0	0	0	0	0	0	0	0	2	0	0		Z(267)	0	0	0	0	1494.59	0	0	0	0	0	0	0	0	1513.24	0	0
Y(268)	0	0	0	0	4	0	0	0	0	0	0	0	0	2	0	0		Z(268)	0	0	0	0	1495.19	0	0	0	0	0	0	0	0	1515.29	0	0
Y(269)	0	0	0	0	4	0	0	0	0	0	0	0	0	2	0	0		Z(269)	0	0	0	0	1498.79	0	0	0	0	0	0	0	0	1515.45	0	0
Y(270)	0	0	0	0	4	0	0	0	0	0	0	0	0	2	0	0		Z(270)	0	0	0	0	1499.39	0	0	0	0	0	0	0	0	1516.15	0	0
Y(271)	0	0	0	0	4	0	0	0	0	0	0	0	0	2	0	0		Z(271)	0	0	0	0	1501.19	0	0	0	0	0	0	0	0	1516.32	0	0
Y(272)	0	0	0	0	4	0	0	0	0	0	0	0	0	2	0	0		Z(272)	0	0	0	0	1502.59	0	0	0	0	0	0	0	0	1517.7	0	0
Y(273)	0	0	0	0	4	0	0	0	0	0	0	0	0	2	0	0		Z(273)	0	0	0	0	1506.19	0	0	0	0	0	0	0	0	1517.99	0	0
Y(274)	0	0	0	0	4	0	0	0	0	0	0	0	0	4	0	0		Z(274)	0	0	0	0	1507.99	0	0	0	0	0	0	0	0	1527.19	0	0
Y(275)	0	0	0	0	4	0	0	0	0	0	0	0	0	2	0	0		Z(275)	0	0	0	0	1510.79	0	0	0	0	0	0	0	0	1529.46	0	0
Y(276)	0	0	0	0	4	0	0	0	0	0	0	0	0	2	0	0		Z(276)	0	0	0	0	1511.39	0	0	0	0	0	0	0	0	1530.42	0	0
Y(277)	0	0	0	0	4	0	0	0	0	0	0	0	0	2	0	0		Z(277)	0	0	0	0	1541.19	0	0	0	0	0	0	0	0	1531.52	0	0
Y(278)	0	0	0	0	4	0	0	0	0	0	0	0	0	2	0	0		Z(278)	0	0	0	0	1547.99	0	0	0	0	0	0	0	0	1531.8	0	0
Y(279)	0	0	0	0	4	0	0	0	0	0	0	0	0	2	0	0		Z(279)	0	0	0	0	1561.19	0	0	0	0	0	0	0	0	1531.93	0	0
Y(280)	0	0	0	0	4	0	0	0	0	0	0	0	0	2	0	0		Z(280)	0	0	0	0	1569.99	0	0	0	0	0	0	0	0	1532.29	0	0
Y(281)	0	0	0	0	4	0	0	0	0	0	0	0	0	2	0	0		Z(281)	0	0	0	0	1573.19	0	0	0	0	0	0	0	0	1533.86	0	0
Y(282)	0	0	0	0	4	0	0	0	0	0	0	0	0	2	0	0		Z(282)	0	0	0	0	1589.59	0	0	0	0	0	0	0	0	1534.01	0	0
Y(283)	0	0	0	0	4	0	0	0	0	0	0	0	0	2	0	0		Z(283)	0	0	0	0	1611.99	0	0	0	0	0	0	0	0	1534.25	0	0
Y(284)	0	0	0	0	4	0	0	0	0	0	0	0	0	2	0	0		Z(284)	0	0	0	0	1613.39	0	0	0	0	0	0	0	0	1535.87	0	0
Y(285)	0	0	0	0	4	0	0	0	0	0	0	0	0	2	0	0		Z(285)	0	0	0	0	1614.79	0	0	0	0	0	0	0	0	1537.09	0	0
Y(286)	0	0	0	0	4	0	0	0	0	0	0	0	0	2	0	0		Z(286)	0	0	0	0	1626.79	0	0	0	0	0	0	0	0	1537.18	0	0
Y(287)	0	0	0	0	4	0	0	0	0	0	0	0	0	2	0	0		Z(287)	0	0	0	0	1635.99	0	0	0	0	0	0	0	0	1539.93	0	0
Y(288)	0	0	0	0	4	0	0	0	0	0	0	0	0	2	0	0		Z(288)	0	0	0	0	1679.79	0	0	0	0	0	0	0	0	1540.02	0	0
Y(289)	0	0	0	0	4	0	0	0	0	0	0	0	0	2	0	0		Z(289)	0	0	0	0	1685.59	0	0	0	0	0	0	0	0	1540.16	0	0
Y(290)	0	0	0	0	4	0	0	0	0	0	0	0	0	2	0	0		Z(290)	0	0	0	0	1693.79	0	0	0	0	0	0	0	0	1541.03	0	0
Y(291)	0	0	0	0	4	0	0	0	0	0	0	0	0	2	0	0		Z(291)	0	0	0	0	1703.59	0	0	0	0	0	0	0	0	1541.76	0	0
Y(292)	0	0	0	0	4	0	0	0	0	0	0	0	0	2	0	0		Z(292)	0	0	0	0	1706.19	0	0	0	0	0	0	0	0	1543.13	0	0
Y(293)	0	0	0	0	4	0	0	0	0	0	0	0	0	2	0	0		Z(293)	0	0	0	0	1713.19	0	0	0	0	0	0	0	0	1543.22	0	0
Y(294)	0	0	0	0	4	0	0	0	0	0	0	0	0	2	0	0		Z(294)	0	0	0	0	1721.19	0	0	0	0	0	0	0	0	1543.61	0	0
Y(295)	0	0	0	0	4	0	0	0	0	0	0	0	0	1	0	0		Z(295)	0	0	0	0	1725.99	0	0	0	0	0	0	0	0	1560.07	0	0
Y(296)	0	0	0	0	4	0	0	0	0	0	0	0	0	3	0	0		Z(296)	0	0	0	0	1759.59	0	0	0	0	0	0	0	0	1560.18	0	0
Y(297)	0	0	0	0	2	0	0	0	0	0	0	0	0	1	0	0		Z(297)	0	0	0	0	1774.37	0	0	0	0	0	0	0	0	1560.38	0	0
Y(298)	0	0	0	0	2	0	0	0	0	0	0	0	0	3	0	0		Z(298)	0	0	0	0	1775.34	0	0	0	0	0	0	0	0	1560.49	0	0
Y(299)	0	0	0	0	2	0	0	0	0	0	0	0	0	1	0	0		Z(299)	0	0	0	0	1775.43	0	0	0	0	0	0	0	0	1563.54	0	0
Y(300)	0	0	0	0	2	0	0	0	0	0	0	0	0	3	0	0		Z(300)	0	0	0	0	1779.98	0	0	0	0	0	0	0	0	1563.65	0	0
Y(301)	0	0	0	0	2	0	0	0	0	0	0	0	0	0	0	0		Z(301)	0	0	0	0	1780.77	0	0	0	0	0	0	0	0	0	0	0
Y(302)	0	0	0	0	4	0	0	0	0	0	0	0	0	0	0	0		Z(302)	0	0	0	0	1798.79	0	0	0	0	0	0	0	0	0	0	0
[truncated: 565 more columns]
