# Supplementary material for: A corticostriatal deficit promotes temporal distortion of automatic action in ageing
Source: eLife journal article supplement (doi:10.7554/elife.29908), 2017-10-23
Supplement: supp [file elife-29908-supp-v1.zip › elife_poa_e29908_Figure_1_source_data_2.xlsx]

## Sheet: Pellet
\Experiment code: JBG007
\Experiment summary: Ten food pellets were randomly delivered to the food receptacle by activating the pellet dispenser output (electric rotor moves 1/12th of a turn) with a P = 0.1 each second. Sessions ended when 10 pellets had been delivered (average session time = 1.66 min). Pellet deliveries were timestamped with 1 ms resolution. During this time, parallel sound level (Sound Level tab) and v…
\Data type and description: event-time stamp data. The time at which each event occurred (Y matrix, values 1-4) was stamped with a 10 ms resolution (Z matrix, centiseconds). Y matrix: 1=active response; 2=inactive response; 3=delivered pellet; 4=Magazine entry (time-controlled; consecutive entries within 200ms are not repeatedly stamped). Data were obtained through MED STATE NOTATION (MED Associa…
\Authors: J Bertran-Gonzalez (ORCID: 0000-0002-3794-1782)
MED Associates Inc
MED PC IV
Random pellet delivery (p=0.1 each second)
Time (sec)	Activity
0	0
0.01	0
0.02	0
0.03	0
0.04	0
0.05	0
0.06	0
0.07	0
0.08	0
0.09	0
0.1	0
0.11	0
0.12	0
0.13	0
0.14	0
0.15	0
0.16	0
0.17	0
0.18	0
0.19	0
0.2	0
0.21	0
0.22	0
0.23	0
0.24	0
0.25	0
0.26	0
0.27	0
0.28	0
0.29	0
0.3	0
0.31	0
0.32	0
0.33	0
0.34	0
0.35	0
0.36	0
0.37	0
0.38	0
0.39	0
0.4	0
0.41	0
0.42	0
0.43	0
0.44	0
0.45	0
0.46	0
0.47	0
0.48	0
0.49	0
0.5	0
0.51	0
0.52	0
0.53	0
0.54	0
0.55	0
0.56	0
0.57	0
0.58	0
0.59	0
0.6	0
0.61	0
0.62	0
0.63	0
0.64	0
0.65	0
0.66	0
0.67	0
0.68	0
0.69	0
0.7	0
0.71	0
0.72	0
0.73	0
0.74	0
0.75	0
0.76	0
0.77	0
0.78	0
0.79	0
0.8	0
0.81	0
0.82	0
0.83	0
0.84	0
0.85	0
0.86	0
0.87	0
0.88	0
0.89	0
0.9	0
0.91	0
0.92	0
0.93	0
0.94	0
0.95	0
0.96	0
0.97	0
0.98	0
0.99	0
1	0
1.01	0
1.02	0
1.03	0
1.04	0
1.05	0
1.06	0
1.07	0
1.08	0
1.09	0
1.1	0
1.11	0
1.12	0
1.13	0
1.14	0
1.15	0
1.16	0
1.17	0
1.18	0
1.19	0
1.2	0
1.21	0
1.22	0
1.23	0
1.24	0
1.25	0
1.26	0
1.27	0
1.28	0
1.29	0
1.3	0
1.31	0
1.32	0
1.33	0
1.34	0
1.35	0
1.36	0
1.37	0
1.38	0
1.39	0
1.4	0
1.41	0
1.42	0
1.43	0
1.44	0
1.45	0
1.46	0
1.47	0
1.48	0
1.49	0
1.5	0
1.51	0
1.52	0
1.53	0
1.54	0
1.55	0
1.56	0
1.57	0
1.58	0
1.59	0
1.6	0
1.61	0
1.62	0
1.63	0
1.64	0
1.65	0
1.66	0
1.67	0
1.68	0
1.69	0
1.7	0
1.71	0
1.72	0
1.73	0
1.74	0
1.75	0
1.76	0
1.77	0
1.78	0
1.79	0
1.8	0
1.81	0
1.82	0
1.83	0
1.84	0
1.85	0
1.86	0
1.87	0
1.88	0
1.89	0
1.9	0
1.91	0
1.92	0
1.93	0
1.94	0
1.95	0
1.96	0
1.97	0
1.98	0
1.99	0
2	0
2.01	0
2.02	0
2.03	0
2.04	0
2.05	0
2.06	0
2.07	0
2.08	0
2.09	0
2.1	0
2.11	0
2.12	0
2.13	0
2.14	0
2.15	0
2.16	0
2.17	0
2.18	0
2.19	0
2.2	0
2.21	0
2.22	0
2.23	0
2.24	0
2.25	0
2.26	0
2.27	0
2.28	0
2.29	0
2.3	0
2.31	0
2.32	0
2.33	0
2.34	0
2.35	0
2.36	0
2.37	0
2.38	0
2.39	0
2.4	0
2.41	0
2.42	0
2.43	0
2.44	0
2.45	0
2.46	0
2.47	0
2.48	0
2.49	0
2.5	0
2.51	0
2.52	0
2.53	0
2.54	0
2.55	0
2.56	0
2.57	0
2.58	0
2.59	0
2.6	0
2.61	0
2.62	0
2.63	0
2.64	0
2.65	0
2.66	0
2.67	0
2.68	0
2.69	0
2.7	0
2.71	0
2.72	0
2.73	0
2.74	0
2.75	0
2.76	0
2.77	0
2.78	0
2.79	0
2.8	0
2.81	0
2.82	0
2.83	0
2.84	0
2.85	0
2.86	0
2.87	0
2.88	0
2.89	0
2.9	0
2.91	0
2.92	0
2.93	0
2.94	0
2.95	0
2.96	0
2.97	0
2.98	0
2.99	0
3	0
3.01	0
3.02	0
3.03	0
3.04	0
3.05	0
3.06	0
3.07	0
3.08	0
3.09	0
3.1	0
3.11	0
3.12	0
3.13	0
3.14	0
3.15	0
3.16	0
3.17	0
3.18	0
3.19	0
3.2	0
3.21	0
3.22	0
3.23	0
3.24	0
3.25	0
3.26	0
3.27	0
3.28	0
3.29	0
3.3	0
3.31	0
3.32	0
3.33	0
3.34	0
3.35	0
3.36	0
3.37	0
3.38	0
3.39	0
3.4	0
3.41	0
3.42	0
3.43	0
3.44	0
3.45	0
3.46	0
3.47	0
3.48	0
3.49	0
3.5	0
3.51	0
3.52	0
3.53	0
3.54	0
3.55	0
3.56	0
3.57	0
3.58	0
3.59	0
3.6	0
3.61	0
3.62	0
3.63	0
3.64	0
3.65	0
3.66	0
3.67	0
3.68	0
3.69	0
3.7	0
3.71	0
3.72	0
3.73	0
3.74	0
3.75	0
3.76	0
3.77	0
3.78	0
3.79	0
3.8	0
3.81	0
3.82	0
3.83	0
3.84	0
3.85	0
3.86	0
3.87	0
3.88	0
3.89	0
3.9	0
3.91	0
3.92	0
3.93	0
3.94	0
3.95	0
3.96	0
3.97	0
3.98	0
3.99	0
4	0
4.01	0
4.02	0
4.03	0
4.04	0
4.05	0
4.06	0
4.07	0
4.08	0
4.09	0
4.1	0
4.11	0
4.12	0
4.13	0
4.14	0
4.15	0
4.16	0
4.17	0
4.18	0
4.19	0
4.2	0
4.21	0
4.22	0
4.23	0
4.24	0
4.25	0
4.26	0
4.27	0
4.28	0
4.29	0
4.3	0
4.31	0
4.32	0
4.33	0
4.34	0
4.35	0
4.36	0
4.37	0
4.38	0
4.39	0
4.4	0
4.41	0
4.42	0
4.43	0
4.44	0
4.45	0
4.46	0
4.47	0
4.48	0
4.49	0
4.5	0
4.51	0
4.52	0
4.53	0
4.54	0
4.55	0
4.56	0
4.57	0
4.58	0
4.59	0
4.6	0
4.61	0
4.62	0
4.63	0
4.64	0
4.65	0
4.66	0
4.67	0
4.68	0
4.69	0
4.7	0
4.71	0
4.72	0
4.73	0
4.74	0
4.75	0
4.76	0
4.77	0
4.78	0
4.79	0
4.8	0
4.81	0
4.82	0
4.83	0
4.84	0
4.85	0
4.86	0
4.87	0
4.88	0
4.89	0
4.9	0
4.91	0
4.92	0
4.93	0
4.94	0
4.95	0
4.96	0
4.97	0
4.98	0
4.99	0
5	0
5.01	0
5.02	0
5.03	0
5.04	0
5.05	0
5.06	0
5.07	0
5.08	0
5.09	0
5.1	0
5.11	0
5.12	0
5.13	0
5.14	0
5.15	0
5.16	0
5.17	0
5.18	0
5.19	0
5.2	0
5.21	0
5.22	0
5.23	0
5.24	0
5.25	0
5.26	0
5.27	0
5.28	0
5.29	0
5.3	0
5.31	0
5.32	0
5.33	0
5.34	0
5.35	0
5.36	0
5.37	0
5.38	0
5.39	0
5.4	0
5.41	0
5.42	0
5.43	0
5.44	0
5.45	0
5.46	0
5.47	0
5.48	0
5.49	0
5.5	0
5.51	0
5.52	0
5.53	0
5.54	0
5.55	0
5.56	0
5.57	0
5.58	0
5.59	0
5.6	0
5.61	0
5.62	0
5.63	0
5.64	0
5.65	0
5.66	0
5.67	0
5.68	0
5.69	0
5.7	0
5.71	0
5.72	0
5.73	0
5.74	0
5.75	0
5.76	0
5.77	0
5.78	0
5.79	0
5.8	0
5.81	0
5.82	0
5.83	0
5.84	0
5.85	0
5.86	0
5.87	0
5.88	0
5.89	0
5.9	0
5.91	0
5.92	0
5.93	0
5.94	0
5.95	0
5.96	0
5.97	0
5.98	0
5.99	0
6	0
6.01	0
6.02	0
6.03	0
6.04	0
6.05	0
6.06	0
6.07	0
6.08	0
6.09	0
6.1	0
6.11	0
6.12	0
6.13	0
6.14	0
6.15	0
6.16	0
6.17	0
6.18	0
6.19	0
6.2	0
6.21	0
6.22	0
6.23	0
6.24	0
6.25	0
6.26	0
6.27	0
6.28	0
6.29	0
6.3	0
6.31	0
6.32	0
6.33	0
6.34	0
6.35	0
6.36	0
6.37	0
6.38	0
6.39	0
6.4	0
6.41	0
6.42	0
6.43	0
6.44	0
6.45	0
6.46	0
6.47	0
6.48	0
6.49	0
6.5	0
6.51	0
6.52	0
6.53	0
6.54	0
6.55	0
6.56	0
6.57	0
6.58	0
6.59	0
6.6	0
6.61	0
6.62	0
6.63	0
6.64	0
6.65	0
6.66	0
6.67	0
6.68	0
6.69	0
6.7	0
6.71	0
6.72	0
6.73	0
6.74	0
6.75	0
6.76	0
6.77	0
6.78	0
6.79	0
6.8	0
6.81	0
6.82	0
6.83	0
6.84	0
6.85	0
6.86	0
6.87	0
6.88	0
6.89	0
6.9	0
6.91	0
6.92	0
6.93	0
6.94	0
6.95	0
6.96	0
6.97	0
6.98	0
6.99	0
7	0
7.01	0
7.02	0
7.03	0
7.04	0
7.05	0
7.06	0
7.07	0
7.08	0
7.09	0
7.1	0
7.11	0
7.12	0
7.13	0
7.14	0
7.15	0
7.16	0
7.17	0
7.18	0
7.19	0
7.2	0
7.21	0
7.22	0
7.23	0
7.24	0
7.25	0
7.26	0
7.27	0
7.28	0
7.29	0
7.3	0
7.31	0
7.32	0
7.33	0
7.34	0
7.35	0
7.36	0
7.37	0
7.38	0
7.39	0
7.4	0
7.41	0
7.42	0
7.43	0
7.44	0
7.45	0
7.46	0
7.47	0
7.48	0
7.49	0
7.5	0
7.51	0
7.52	0
7.53	0
7.54	0
7.55	0
7.56	0
7.57	0
7.58	0
7.59	0
7.6	0
7.61	0
7.62	0
7.63	0
7.64	0
7.65	0
7.66	0
7.67	0
7.68	0
7.69	0
7.7	0
7.71	0
7.72	0
7.73	0
7.74	0
7.75	0
7.76	0
7.77	0
7.78	0
7.79	0
7.8	0
7.81	0
7.82	0
7.83	0
7.84	0
7.85	0
7.86	0
7.87	0
7.88	0
7.89	0
7.9	0
7.91	0
7.92	0
7.93	0
7.94	0
7.95	0
7.96	0
7.97	0
7.98	0
7.99	0
8	0
8.01	0
8.02	0
8.03	0
8.04	0
8.05	0
8.06	0
8.07	0
8.08	0
8.09	0
8.1	0
8.11	0
8.12	0
8.13	0
8.14	0
8.15	0
8.16	0
8.17	0
8.18	0
8.19	0
8.2	0
8.21	0
8.22	0
8.23	0
8.24	0
8.25	0
8.26	0
8.27	0
8.28	0
8.29	0
8.3	0
8.31	0
8.32	0
8.33	0
8.34	0
8.35	0
8.36	0
8.37	0
8.38	0
8.39	0
8.4	0
8.41	0
8.42	0
8.43	0
8.44	0
8.45	0
8.46	0
8.47	0
8.48	0
8.49	0
8.5	0
8.51	0
8.52	0
8.53	0
8.54	0
8.55	0
8.56	0
8.57	0
8.58	0
8.59	0
8.6	0
8.61	0
8.62	0
8.63	0
8.64	0
8.65	0
8.66	0
8.67	0
8.68	0
8.69	0
8.7	0
8.71	0
8.72	0
8.73	0
8.74	0
8.75	0
8.76	0
8.77	0
8.78	0
8.79	0
8.8	0
8.81	0
8.82	0
8.83	0
8.84	0
8.85	0
8.86	0
8.87	0
8.88	0
8.89	0
8.9	0
8.91	0
8.92	0
8.93	0
8.94	0
8.95	0
8.96	0
8.97	0
8.98	0
8.99	0
9	0
9.01	0
9.02	0
9.03	0
9.04	0
9.05	0
9.06	0
9.07	0
9.08	0
9.09	0
9.1	0
9.11	0
9.12	0
9.13	0
9.14	0
9.15	0
9.16	0
9.17	0
9.18	0
9.19	0
9.2	0
9.21	0
9.22	0
9.23	0
9.24	0
9.25	0
9.26	0
9.27	0
9.28	0
9.29	0
9.3	0
9.31	0
9.32	0
9.33	0
9.34	0
9.35	0
9.36	0
9.37	0
9.38	0
9.39	0
9.4	0
9.41	0
9.42	0
9.43	0
9.44	0
9.45	0
9.46	0
9.47	0
9.48	0
9.49	0
9.5	0
9.51	0
9.52	0
9.53	0
9.54	0
9.55	0
9.56	0
9.57	0
9.58	0
9.59	0
9.6	0
9.61	0
9.62	0
9.63	0
9.64	0
9.65	0
9.66	0
9.67	0
9.68	0
9.69	0
9.7	0
9.71	0
9.72	0
9.73	0
9.74	0
9.75	0
9.76	0
9.77	0
9.78	0
9.79	0
9.8	0
9.81	0
9.82	0
9.83	0
9.84	0
9.85	0
9.86	0
9.87	0
9.88	0
9.89	0
9.9	0
9.91	0
9.92	0
9.93	0
9.94	0
9.95	0
9.96	0
9.97	0
9.98	0
9.99	0
10	0
10.01	0
10.02	0
10.03	0
10.04	0
10.05	0
10.06	0
10.07	0
10.08	0
10.09	0
10.1	0
10.11	0
10.12	0
10.13	0
10.14	0
10.15	0
10.16	0
10.17	0
10.18	0
10.19	0
10.2	0
10.21	0
10.22	0
10.23	0
10.24	0
10.25	0
10.26	0
10.27	0
10.28	0
10.29	0
10.3	0
10.31	0
10.32	0
10.33	0
10.34	0
10.35	0
10.36	0
10.37	0
10.38	0
10.39	0
10.4	0
10.41	0
10.42	0
10.43	0
10.44	0
10.45	0
10.46	0
10.47	0
10.48	0
10.49	0
10.5	0
10.51	0
10.52	0
10.53	0
10.54	0
10.55	0
10.56	0
10.57	0
10.58	0
10.59	0
10.6	0
10.61	0
10.62	0
10.63	0
10.64	0
10.65	0
10.66	0
10.67	0
10.68	0
10.69	0
10.7	0
10.71	0
10.72	0
10.73	0
10.74	0
10.75	0
10.76	0
10.77	0
10.78	0
10.79	0
10.8	0
10.81	0
10.82	0
10.83	0
10.84	0
10.85	0
10.86	0
10.87	0
10.88	0
10.89	0
10.9	0
10.91	0
10.92	0
10.93	0
10.94	0
10.95	0
10.96	0
10.97	0
10.98	0
10.99	0
11	0
11.01	0
11.02	0
11.03	0
11.04	0
11.05	0
11.06	0
11.07	0
11.08	0
11.09	0
11.1	0
11.11	0
11.12	0
11.13	0
11.14	0
11.15	0
11.16	0
11.17	0
11.18	0
11.19	0
11.2	0
11.21	0
11.22	0
11.23	0
11.24	0
11.25	0
11.26	0
11.27	0
11.28	0
11.29	0
11.3	0
11.31	0
11.32	0
11.33	0
11.34	0
11.35	0
11.36	0
11.37	0
11.38	0
11.39	0
11.4	0
11.41	0
11.42	0
11.43	0
11.44	0
11.45	0
11.46	0
11.47	0
11.48	0
11.49	0
11.5	0
11.51	0
11.52	0
11.53	0
11.54	0
11.55	0
11.56	0
11.57	0
11.58	0
11.59	0
11.6	0
11.61	0
11.62	0
11.63	0
11.64	0
11.65	0
11.66	0
11.67	0
11.68	0
11.69	0
11.7	0
11.71	0
11.72	0
11.73	0
11.74	0
11.75	0
11.76	0
11.77	0
11.78	0
11.79	0
11.8	0
11.81	0
11.82	0
11.83	0
11.84	0
11.85	0
11.86	0
11.87	0
11.88	0
11.89	0
11.9	0
11.91	0
11.92	0
11.93	0
11.94	0
11.95	0
11.96	0
11.97	0
11.98	0
11.99	0
12	0
12.01	0
12.02	0
12.03	0
12.04	0
12.05	0
12.06	0
12.07	0
12.08	0
12.09	0
12.1	0
12.11	0
12.12	0
12.13	0
12.14	0
12.15	0
12.16	0
12.17	0
12.18	0
12.19	0
12.2	0
12.21	0
12.22	0
12.23	0
12.24	0
12.25	0
12.26	0
12.27	0
12.28	0
12.29	0
12.3	0
12.31	0
12.32	0
12.33	0
12.34	0
12.35	0
12.36	0
12.37	0
12.38	0
12.39	0
12.4	0
12.41	0
12.42	0
12.43	0
12.44	0
12.45	0
12.46	0
12.47	0
12.48	0
12.49	0
12.5	0
12.51	0
12.52	0
12.53	0
12.54	0
12.55	0
12.56	0
12.57	0
12.58	0
12.59	0
12.6	0
12.61	0
12.62	0
12.63	0
12.64	0
12.65	0
12.66	0
12.67	0
12.68	0
12.69	0
12.7	0
12.71	0
12.72	0
12.73	0
12.74	0
12.75	0
12.76	0
12.77	0
12.78	0
12.79	0
12.8	0
12.81	0
12.82	0
12.83	0
12.84	0
12.85	0
12.86	0
12.87	0
12.88	0
12.89	0
12.9	0
12.91	0
12.92	0
12.93	0
12.94	0
12.95	0
12.96	0
12.97	0
12.98	0
12.99	0
13	0
13.01	0
13.02	0
13.03	0
13.04	0
13.05	0
13.06	0
13.07	0
13.08	0
13.09	0
13.1	0
13.11	0
13.12	0
13.13	0
13.14	0
13.15	0
13.16	0
13.17	0
13.18	0
13.19	0
13.2	0
13.21	0
13.22	0
13.23	0
13.24	0
13.25	0
13.26	0
13.27	0
13.28	0
13.29	0
13.3	0
13.31	0
13.32	0
13.33	0
13.34	0
13.35	0
13.36	0
13.37	0
13.38	0
13.39	0
13.4	0
13.41	0
13.42	0
13.43	0
13.44	0
13.45	0
13.46	0
13.47	0
13.48	0
13.49	0
13.5	0
13.51	0
13.52	0
13.53	0
13.54	0
13.55	0
13.56	0
13.57	0
13.58	0
13.59	0
13.6	0
13.61	0
13.62	0
13.63	0
13.64	0
13.65	0
13.66	0
13.67	0
13.68	0
13.69	0
13.7	0
13.71	0
13.72	0
13.73	0
13.74	0
13.75	0
13.76	0
13.77	0
13.78	0
13.79	0
13.8	0
13.81	0
13.82	0
13.83	0
13.84	0
13.85	0
13.86	0
13.87	0
13.88	0
13.89	0
13.9	0
13.91	0
13.92	0
13.93	0
13.94	0
13.95	0
13.96	0
13.97	0
13.98	0
13.99	0
14	0
14.01	0
14.02	0
14.03	0
14.04	0
14.05	0
14.06	0
14.07	0
14.08	0
14.09	0
14.1	0
14.11	0
14.12	0
14.13	0
14.14	0
14.15	0
14.16	0
14.17	0
14.18	0
14.19	0
14.2	0
14.21	0
14.22	0
14.23	0
14.24	0
14.25	0
14.26	0
14.27	0
14.28	0
14.29	0
14.3	0
14.31	0
14.32	0
14.33	0
14.34	0
14.35	0
14.36	0
14.37	0
14.38	0
14.39	0
14.4	0
14.41	0
14.42	0
14.43	0
14.44	0
14.45	0
14.46	0
14.47	0
14.48	0
14.49	0
14.5	0
14.51	0
14.52	0
14.53	0
14.54	0
14.55	0
14.56	0
14.57	0
14.58	0
14.59	0
14.6	0
14.61	0
14.62	0
14.63	0
14.64	0
14.65	0
14.66	0
14.67	0
14.68	0
14.69	0
14.7	0
14.71	0
14.72	0
14.73	0
14.74	0
14.75	0
14.76	0
14.77	0
14.78	0
14.79	0
14.8	0
14.81	0
14.82	0
14.83	0
14.84	0
14.85	0
14.86	0
14.87	0
14.88	0
14.89	0
14.9	0
14.91	0
14.92	0
14.93	0
14.94	0
14.95	0
14.96	0
14.97	0
14.98	0
14.99	0
15	0
15.01	0
15.02	0
15.03	0
15.04	0
15.05	0
15.06	0
15.07	0
15.08	0
15.09	0
15.1	0
15.11	0
15.12	0
15.13	0
15.14	0
15.15	0
15.16	0
15.17	0
15.18	0
15.19	0
15.2	0
15.21	0
15.22	0
15.23	0
15.24	0
15.25	0
15.26	0
15.27	0
15.28	0
15.29	0
15.3	0
15.31	0
15.32	0
15.33	0
15.34	0
15.35	0
15.36	0
15.37	0
15.38	0
15.39	0
15.4	0
15.41	0
15.42	0
15.43	0
15.44	0
15.45	0
15.46	0
15.47	0
15.48	0
15.49	0
15.5	0
15.51	0
15.52	0
15.53	0
15.54	0
15.55	0
15.56	0
15.57	0
15.58	0
15.59	0
15.6	0
15.61	0
15.62	0
15.63	0
15.64	0
15.65	0
15.66	0
15.67	0
15.68	0
15.69	0
15.7	0
15.71	0
15.72	0
15.73	0
15.74	0
15.75	0
15.76	0
15.77	0
15.78	0
15.79	0
15.8	0
15.81	0
15.82	0
15.83	0
15.84	0
15.85	0
15.86	0
15.87	0
15.88	0
15.89	0
15.9	0
15.91	0
15.92	0
15.93	0
15.94	0
15.95	0
15.96	0
15.97	0
15.98	0
15.99	0
16	0
16.01	0
16.02	0
16.03	0
16.04	0
16.05	0
16.06	0
16.07	0
16.08	0
16.09	0
16.1	0
16.11	0
16.12	0
16.13	0
16.14	0
16.15	0
16.16	0
16.17	0
16.18	0
16.19	0
16.2	0
16.21	0
16.22	0
16.23	0
16.24	0
16.25	0
16.26	0
16.27	0
16.28	0
16.29	0
16.3	0
16.31	0
16.32	0
16.33	0
16.34	0
16.35	0
16.36	0
16.37	0
16.38	0
16.39	0
16.4	0
16.41	0
16.42	0
16.43	0
16.44	0
16.45	0
16.46	0
16.47	0
16.48	0
16.49	0
16.5	0
16.51	0
16.52	0
16.53	0
16.54	0
16.55	0
16.56	0
16.57	0
16.58	0
16.59	0
16.6	0
16.61	0
16.62	0
16.63	0
16.64	0
16.65	0
16.66	0
16.67	0
16.68	0
16.69	0
16.7	0
16.71	0
16.72	0
16.73	0
16.74	0
16.75	0
16.76	0
16.77	0
16.78	0
16.79	0
16.8	0
16.81	0
16.82	0
16.83	0
16.84	0
16.85	0
16.86	0
16.87	0
16.88	0
16.89	0
16.9	0
16.91	0
16.92	0
16.93	0
16.94	0
16.95	0
16.96	0
16.97	0
16.98	0
16.99	0
17	0
17.01	0
17.02	0
17.03	0
17.04	0
17.05	0
17.06	0
17.07	0
17.08	0
17.09	0
17.1	0
17.11	0
17.12	0
17.13	0
17.14	0
17.15	0
17.16	0
17.17	0
17.18	0
17.19	0
17.2	0
17.21	0
17.22	0
17.23	0
17.24	0
17.25	0
17.26	0
17.27	0
17.28	0
17.29	0
17.3	0
17.31	0
17.32	0
17.33	0
17.34	0
17.35	0
17.36	0
17.37	0
17.38	0
17.39	0
17.4	0
17.41	0
17.42	0
17.43	0
17.44	0
17.45	0
17.46	0
17.47	0
17.48	0
17.49	0
17.5	0
17.51	0
17.52	0
17.53	0
17.54	0
17.55	0
17.56	0
17.57	0
17.58	0
17.59	0
17.6	0
17.61	0
17.62	0
17.63	0
17.64	0
17.65	0
17.66	0
17.67	0
17.68	0
17.69	0
17.7	0
17.71	0
17.72	0
17.73	0
17.74	0
17.75	0
17.76	0
17.77	0
17.78	0
17.79	0
17.8	0
17.81	0
17.82	0
17.83	0
17.84	0
17.85	0
17.86	0
17.87	0
17.88	0
17.89	0
17.9	0
17.91	0
17.92	0
17.93	0
17.94	0
17.95	0
17.96	0
17.97	0
17.98	0
17.99	0
18	0
18.01	0
18.02	0
18.03	0
18.04	0
18.05	0
18.06	0
18.07	0
18.08	0
18.09	0
18.1	0
18.11	1
18.12	1
18.13	1
18.14	1
18.15	1
18.16	1
18.17	1
18.18	1
18.19	1
18.2	1
18.21	0
18.22	0
18.23	0
18.24	0
18.25	0
18.26	0
18.27	0
18.28	0
18.29	0
18.3	0
18.31	0
18.32	0
18.33	0
18.34	0
18.35	0
18.36	0
18.37	0
18.38	0
18.39	0
18.4	0
18.41	0
18.42	0
18.43	0
18.44	0
18.45	0
18.46	0
18.47	0
18.48	0
18.49	0
18.5	0
18.51	0
18.52	0
18.53	0
18.54	0
18.55	0
18.56	0
18.57	0
18.58	0
18.59	0
18.6	0
18.61	0
18.62	0
18.63	0
18.64	0
18.65	0
18.66	0
18.67	0
18.68	0
18.69	0
18.7	0
18.71	0
18.72	0
18.73	0
18.74	0
18.75	0
18.76	0
18.77	0
18.78	0
18.79	0
18.8	0
18.81	0
18.82	0
18.83	0
18.84	0
18.85	0
18.86	0
18.87	0
18.88	0
18.89	0
18.9	0
18.91	0
18.92	0
18.93	0
18.94	0
18.95	0
18.96	0
18.97	0
18.98	0
18.99	0
19	0
19.01	0
19.02	0
19.03	0
19.04	0
19.05	0
19.06	0
19.07	0
19.08	0
19.09	0
19.1	0
19.11	0
19.12	0
19.13	0
19.14	0
19.15	0
19.16	0
19.17	0
19.18	0
19.19	0
19.2	0
19.21	0
19.22	0
19.23	0
19.24	0
19.25	0
19.26	0
19.27	0
19.28	0
19.29	0
19.3	0
19.31	0
19.32	0
19.33	0
19.34	0
19.35	0
19.36	0
19.37	0
19.38	0
19.39	0
19.4	0
19.41	0
19.42	0
19.43	0
19.44	0
19.45	0
19.46	0
19.47	0
19.48	0
19.49	0
19.5	0
19.51	0
19.52	0
19.53	0
19.54	0
19.55	0
19.56	0
19.57	0
19.58	0
19.59	0
19.6	0
19.61	0
19.62	0
19.63	0
19.64	0
19.65	0
19.66	0
19.67	0
19.68	0
19.69	0
19.7	0
19.71	0
19.72	0
19.73	0
19.74	0
19.75	0
19.76	0
19.77	0
19.78	0
19.79	0
19.8	0
19.81	0
19.82	0
19.83	0
19.84	0
19.85	0
19.86	0
19.87	0
19.88	0
19.89	0
19.9	0
19.91	0
[truncated: 6,529 more rows]

## Sheet: Sound Level
	\Experiment code: JBG029
	\Experiment summary: Sound level data was recorded using Sound Analyzer v2.2 at variable time weightings (Fast [F]: 125 ms up and down; Slow [S]: 1 s up and down; and Impulse [I]: 35 ms up and 1.5 s down) and different frequency filters (Z [zero]-filter: audio range 10 Hz to 20 kHz ±1.5 dB; A-filter: audio range -20 Hz to 20 kHz; C-filter: loud sound detection). Sound exposure level (E) and equiv…
	\Data type and description: Decibels (dB) over time (sec)
	\Authors: J Bertran-Gonzalez (ORCID: 0000-0002-3794-1782)
Mode:	Sound Analyzer App: v2.2	SLM
Last calibration:	Last calibration:	07/08/2017 - 12:01:21 pm
Date:	Date:	7 Aug 2017
Time:	Time:	01:30:49 pm
Duration (s):	Duration (s):	124.366
Overflow:	Overflow:	0
Statistics	Statistics	LZE (dB)	LZeq (dB)	LZF (dB)	LZS (dB)	LZI (dB)	LAE (dBA)	LAeq (dBA)	LAF (dBA)	LAS (dBA)	LAI (dBA)	LCE (dBC)	LCeq (dBC)	LCF (dBC)	LCS (dBC)	LCI (dBC)
Max	Max	n/a	n/a	95.43	90.16	97.79	n/a	n/a	94.57	89.04	96.8	n/a	n/a	94.68	89.26	96.99
Min	Min	n/a	n/a	64.79	66.97	70.52	n/a	n/a	60.59	64.08	68.03	n/a	n/a	64.66	66.84	70.8
Time (s):	Time (s):	LZE (dB)	LZeq (dB)	LZF (dB)	LZS (dB)	LZI (dB)	LAE (dBA)	LAeq (dBA)	LAF (dBA)	LAS (dBA)	LAI (dBA)	LCE (dBC)	LCeq (dBC)	LCF (dBC)	LCS (dBC)	LCI (dBC)
0.09288	0.09288	61.22	71.54	69.78	66.97	71.54	59.37	69.69	67.62	64.08	69.69	61.1	71.42	69.66	66.84	71.42
0.18576	0.18576	63.65	70.96	70.09	67.39	71.48	61.45	68.76	67.62	64.53	69.59	63.52	70.83	69.95	67.26	71.36
0.278639	0.278639	65.32	70.87	70.4	67.81	71.43	62.96	68.51	67.81	64.97	69.51	65.19	70.74	70.27	67.67	71.31
0.371519	0.371519	66.44	70.74	70.32	68.1	71.37	64.05	68.36	67.84	65.32	69.42	66.31	70.61	70.18	67.97	71.25
0.464399	0.464399	67.39	70.72	70.39	68.39	71.33	64.9	68.23	67.74	65.6	69.34	67.25	70.58	70.23	68.25	71.21
0.557279	0.557279	68.29	70.83	71.02	68.76	71.39	65.66	68.2	67.94	65.88	69.27	68.15	70.69	70.85	68.61	71.21
0.650159	0.650159	69.11	70.98	71.49	69.13	71.79	66.46	68.33	68.56	66.27	69.26	68.96	70.83	71.33	68.98	71.64
0.743039	0.743039	69.72	71.01	71.45	69.37	71.76	67.13	68.42	68.91	66.6	69.24	69.58	70.87	71.29	69.22	71.61
0.835918	0.835918	70.4	71.18	71.93	69.73	72.32	67.81	68.59	69.37	66.99	69.72	70.26	71.04	71.8	69.58	72.21
0.928798	0.928798	71.02	71.34	72.36	70.07	72.56	68.51	68.83	70.1	67.45	70.57	70.87	71.19	72.2	69.92	72.38
1.02168	1.02168	71.51	71.42	72.26	70.3	72.54	69.07	68.97	70.17	67.78	70.55	71.36	71.27	72.11	70.15	72.36
1.11456	1.11456	71.95	71.47	72.12	70.49	72.51	69.56	69.09	70.12	68.06	70.53	71.8	71.33	71.97	70.34	72.33
1.20744	1.20744	72.33	71.51	71.97	70.63	72.48	69.97	69.15	69.98	68.25	70.49	72.18	71.36	71.83	70.48	72.3
1.30032	1.30032	72.73	71.59	72.3	70.84	72.52	70.37	69.23	70.17	68.46	70.47	72.58	71.44	72.17	70.69	72.4
1.3932	1.3932	73.1	71.66	72.32	71.01	72.52	70.73	69.29	70.08	68.63	70.45	72.95	71.51	72.19	70.87	72.4
1.48608	1.48608	73.34	71.62	71.7	71.01	72.44	71.03	69.31	69.77	68.71	70.39	73.2	71.48	71.58	70.87	72.32
1.57896	1.57896	73.62	71.64	71.86	71.1	72.41	71.33	69.34	69.88	68.83	70.37	73.48	71.5	71.73	70.96	72.29
1.67184	1.67184	73.87	71.64	71.78	71.16	72.37	71.56	69.33	69.49	68.86	70.3	73.73	71.5	71.65	71.02	72.25
1.76472	1.76472	74.06	71.6	71.24	71.12	72.29	71.76	69.29	68.96	68.82	70.21	73.92	71.45	71.1	70.98	72.17
1.8576	1.8576	74.24	71.55	70.94	71.08	72.21	71.99	69.3	69.25	68.88	70.17	74.1	71.41	70.81	70.94	72.09
1.95048	1.95048	74.43	71.53	70.97	71.07	72.14	72.26	69.36	69.92	69.05	70.47	74.29	71.39	70.83	70.94	72.02
2.04336	2.04336	74.59	71.49	70.66	71.02	72.06	72.48	69.38	69.71	69.11	70.43	74.45	71.35	70.52	70.89	71.94
2.13624	2.13624	74.75	71.45	70.57	70.99	71.98	72.69	69.4	69.73	69.17	70.39	74.61	71.31	70.44	70.85	71.86
2.22912	2.22912	74.93	71.44	70.92	71.01	71.94	72.9	69.42	69.79	69.24	70.36	74.79	71.31	70.79	70.88	71.82
2.32199	2.32199	75.07	71.41	70.66	70.96	71.87	73.08	69.42	69.67	69.27	70.32	74.93	71.27	70.52	70.82	71.74
2.41487	2.41487	75.23	71.41	71.08	71	71.84	73.26	69.43	69.68	69.3	70.28	75.09	71.27	70.94	70.86	71.71
2.50775	2.50775	75.39	71.4	71.12	71.02	71.8	73.45	69.46	69.92	69.39	70.27	75.25	71.26	70.99	70.88	71.68
2.60064	2.60064	75.54	71.39	71.13	71.02	71.76	73.63	69.48	70.01	69.44	70.26	75.4	71.25	71.01	70.89	71.64
2.69352	2.69352	75.7	71.4	71.43	71.09	71.76	73.82	69.51	70.17	69.54	70.4	75.57	71.26	71.31	70.96	71.64
2.7864	2.7864	75.84	71.39	71.22	71.09	71.72	73.97	69.52	69.85	69.54	70.35	75.7	71.25	71.08	70.95	71.59
2.87927	2.87927	76.02	71.42	71.84	71.22	72.37	74.14	69.55	70.13	69.62	70.4	75.88	71.29	71.71	71.08	72.23
2.97215	2.97215	76.17	71.44	71.88	71.28	72.35	74.3	69.57	70.12	69.67	70.38	76.03	71.3	71.76	71.15	72.2
3.06503	3.06503	77.63	72.76	81.03	74.55	82.65	75.24	70.38	77.1	71.73	78.6	77.5	72.64	80.94	74.44	82.52
3.15791	3.15791	77.82	72.83	78.72	74.55	82.42	75.44	70.44	75.15	71.76	78.39	77.7	72.7	78.63	74.44	82.3
3.25079	3.25079	78.01	72.89	76.99	74.56	82.2	75.6	70.48	73.6	71.75	78.18	77.89	72.77	76.89	74.45	82.07
3.34367	3.34367	83.1	77.86	88.23	81.97	90.2	79.23	73.99	83.56	77.62	85.27	83	77.76	88.15	81.88	89.88
3.43655	3.43655	83.14	77.78	85.15	81.62	89.94	79.28	73.91	80.52	77.29	85.01	83.05	77.68	85.07	81.53	89.62
3.52943	3.52943	83.18	77.7	82.19	81.27	89.67	79.31	73.83	77.57	76.94	84.75	83.08	77.6	82.11	81.18	89.36
3.62231	3.62231	83.22	77.63	79.47	80.93	89.41	79.34	73.75	74.9	76.59	84.48	83.12	77.53	79.38	80.84	89.09
3.71519	3.71519	83.25	77.55	77.02	80.58	89.15	79.37	73.67	72.51	76.24	84.22	83.15	77.45	76.92	80.49	88.83
3.80807	3.80807	83.28	77.47	75.16	80.23	88.88	79.41	73.6	71.18	75.93	83.96	83.18	77.37	75.04	80.14	88.57
3.90095	3.90095	83.66	77.75	80.63	80.6	88.69	80.08	74.17	78.99	76.95	83.86	83.48	77.57	79.63	80.35	88.36
3.99383	3.99383	83.71	77.7	78.49	80.31	88.43	80.13	74.12	76.5	76.65	83.61	83.53	77.52	77.7	80.06	88.1
4.08671	4.08671	83.76	77.64	76.7	80	88.17	80.17	74.06	74.24	76.34	83.35	83.58	77.46	76.09	79.75	87.84
4.17959	4.17959	83.8	77.59	75.42	79.7	87.92	80.21	74	72.48	76.03	83.09	83.62	77.41	74.97	79.46	87.59
4.27247	4.27247	84.27	77.96	81.56	80.43	87.77	80.65	74.34	77.77	76.71	82.98	84.09	77.79	81.43	80.22	87.45
4.36535	4.36535	84.31	77.91	79.21	80.14	87.52	80.69	74.29	75.43	76.42	82.73	84.14	77.74	79.08	79.93	87.2
4.45823	4.45823	84.34	77.85	77.1	79.83	87.26	80.72	74.23	73.26	76.1	82.48	84.17	77.68	76.95	79.62	86.94
4.55111	4.55111	84.38	77.79	75.5	79.52	87	80.75	74.17	71.6	75.78	82.22	84.2	77.62	75.36	79.31	86.68
4.64399	4.64399	84.4	77.73	74.23	79.2	86.74	80.78	74.11	70.51	75.47	81.96	84.23	77.56	74.09	78.99	86.42
4.73687	4.73687	84.45	77.7	75.16	78.97	86.5	80.85	74.09	72.42	75.31	81.73	84.27	77.52	74.53	78.74	86.17
4.82975	4.82975	84.61	77.77	77.74	79.1	86.29	81.16	74.32	76.71	75.95	81.64	84.39	77.55	76.48	78.73	85.95
4.92263	4.92263	84.63	77.71	75.51	78.77	86.03	81.18	74.26	74.09	75.61	81.38	84.41	77.48	74.5	78.41	85.69
5.01551	5.01551	84.65	77.64	73.99	78.45	85.77	81.2	74.19	71.86	75.28	81.12	84.43	77.42	73.27	78.09	85.44
5.10839	5.10839	84.67	77.59	72.98	78.14	85.52	81.22	74.13	70.26	74.95	80.87	84.45	77.37	72.49	77.78	85.18
5.20127	5.20127	84.69	77.53	72.82	77.85	85.26	81.24	74.08	69.56	74.65	80.62	84.47	77.31	72.52	77.51	84.92
5.29415	5.29415	84.71	77.47	71.59	77.52	85	81.26	74.02	68.36	74.32	80.36	84.49	77.25	71.33	77.18	84.67
5.38703	5.38703	84.75	77.43	73.31	77.32	84.76	81.31	74	71.2	74.2	80.14	84.52	77.2	72.17	76.92	84.41
5.47991	5.47991	84.77	77.38	72.54	77.03	84.5	81.33	73.94	69.91	73.91	79.89	84.54	77.15	71.82	76.64	84.16
5.57279	5.57279	84.79	77.32	72.13	76.75	84.25	81.35	73.89	68.89	73.6	79.64	84.56	77.09	71.68	76.36	83.9
5.66567	5.66567	84.81	77.28	72.14	76.49	84	81.37	73.84	68.36	73.31	79.39	84.58	77.05	71.85	76.12	83.65
5.75855	5.75855	84.83	77.22	71.8	76.22	83.74	81.39	73.79	68.45	73.05	79.14	84.6	76.99	71.54	75.85	83.4
5.85143	5.85143	84.85	77.18	72.08	75.99	83.49	81.41	73.74	68.52	72.79	78.89	84.62	76.95	71.87	75.62	83.15
5.94431	5.94431	84.86	77.12	71.21	75.69	83.24	81.42	73.68	67.76	72.5	78.64	84.63	76.89	71.01	75.33	82.9
6.03719	6.03719	84.88	77.07	70.91	75.42	82.98	81.44	73.63	67.64	72.22	78.4	84.65	76.84	70.71	75.07	82.65
6.13007	6.13007	84.9	77.03	71.58	75.22	82.74	81.46	73.58	67.95	71.99	78.15	84.67	76.8	71.39	74.88	82.4
6.22295	6.22295	84.92	76.98	71.43	74.99	82.49	81.48	73.54	67.73	71.73	77.91	84.69	76.75	71.25	74.65	82.15
6.31583	6.31583	84.94	76.93	71.59	74.78	82.24	81.49	73.49	67.69	71.49	77.67	84.71	76.71	71.41	74.45	81.91
6.40871	6.40871	84.96	76.89	71.67	74.58	82	81.51	73.44	67.61	71.25	77.42	84.73	76.66	71.5	74.26	81.66
6.50159	6.50159	84.97	76.84	71.36	74.36	81.75	81.52	73.39	67.01	70.99	77.18	84.75	76.62	71.2	74.04	81.42
6.59447	6.59447	85.14	76.95	79.8	75.69	81.73	81.84	73.65	79.15	73.47	80.84	84.87	76.68	78.2	74.97	81.33
6.68735	6.68735	85.16	76.91	77.36	75.48	81.49	81.86	73.6	76.21	73.16	80.58	84.89	76.64	76.04	74.79	81.1
6.78023	6.78023	85.73	77.42	83.32	78.72	84.72	82.63	74.32	81.48	76.66	84.54	85.45	77.14	82.86	78.23	83.75
6.87311	6.87311	85.75	77.38	80.44	78.41	84.46	82.64	74.27	78.43	76.3	84.28	85.47	77.1	80.01	77.92	83.5
6.96599	6.96599	85.78	77.35	78.33	78.18	84.22	82.68	74.25	76.22	76.06	84.03	85.5	77.07	77.86	77.69	83.26
7.05887	7.05887	85.8	77.32	76.52	77.92	83.98	82.7	74.22	74.33	75.79	83.77	85.52	77.03	76.01	77.42	83.02
7.15175	7.15175	85.92	77.38	78.98	78.22	83.83	82.88	74.34	77.5	76.23	83.6	85.61	77.06	77.72	77.57	82.86
7.24463	7.24463	85.94	77.34	76.53	77.9	83.58	82.89	74.29	74.63	75.87	83.34	85.62	77.02	75.47	77.27	82.61
7.33751	7.33751	85.95	77.3	74.78	77.61	83.33	82.9	74.25	72.1	75.52	83.07	85.64	76.98	74.01	76.99	82.36
7.43039	7.43039	85.97	77.26	73.23	77.3	83.08	82.91	74.2	69.97	75.17	82.81	85.65	76.94	72.68	76.7	82.11
7.52327	7.52327	85.99	77.22	73.26	77.06	82.84	82.92	74.16	68.7	74.83	82.55	85.67	76.91	72.94	76.48	81.88
7.61615	7.61615	86.01	77.19	72.95	76.8	82.59	82.93	74.11	67.74	74.49	82.29	85.69	76.88	72.72	76.23	81.64
7.70902	7.70902	86.02	77.15	72.84	76.56	82.35	82.94	74.07	67.37	74.16	82.03	85.71	76.84	72.67	76.01	81.41
7.8019	7.8019	86.04	77.12	72.92	76.33	82.11	82.95	74.03	67.14	73.83	81.77	85.73	76.81	72.78	75.8	81.18
7.89478	7.89478	86.06	77.09	72.44	76.09	81.87	82.96	73.99	66.68	73.5	81.51	85.75	76.78	72.31	75.57	80.94
7.98766	7.98766	86.07	77.05	72.22	75.84	81.63	82.97	73.94	66.79	73.19	81.25	85.77	76.74	72.09	75.33	80.7
8.08054	8.08054	86.1	77.02	72.75	75.66	81.4	82.98	73.91	67.41	72.91	80.99	85.79	76.71	72.63	75.18	80.48
8.17342	8.17342	86.12	77	73.27	75.52	81.18	82.99	73.87	67.43	72.63	80.73	85.81	76.69	73.15	75.06	80.27
8.2663	8.2663	86.14	76.97	73.48	75.39	80.96	83	73.83	67.46	72.35	80.48	85.84	76.66	73.36	74.95	80.06
8.35918	8.35918	86.16	76.94	72.93	75.19	80.73	83.01	73.79	67.26	72.07	80.22	85.85	76.63	72.81	74.76	79.84
8.45206	8.45206	86.18	76.91	72.77	75.01	80.5	83.02	73.75	67.13	71.8	79.97	85.87	76.6	72.65	74.6	79.62
8.54494	8.54494	86.2	76.88	72.98	74.88	80.29	83.04	73.72	67.45	71.56	79.71	85.89	76.58	72.86	74.49	79.41
8.63782	8.63782	86.21	76.85	72.54	74.7	80.06	83.05	73.68	67.36	71.31	79.46	85.91	76.55	72.41	74.32	79.19
8.7307	8.7307	86.24	76.83	73.81	74.7	79.87	83.07	73.66	68.88	71.2	79.22	85.94	76.53	73.69	74.34	79.02
8.82358	8.82358	86.26	76.81	73.69	74.62	79.67	83.08	73.63	69.15	71.07	78.98	85.96	76.51	73.56	74.28	78.83
8.91646	8.91646	86.29	76.79	74.09	74.6	79.48	83.1	73.6	69.67	70.99	78.75	85.99	76.49	73.96	74.28	78.66
9.00934	9.00934	86.32	76.77	74.15	74.57	79.29	83.12	73.57	69.59	70.87	78.51	86.02	76.47	74.01	74.26	78.48
9.10222	9.10222	86.34	76.75	74.51	74.6	79.13	83.14	73.55	70.11	70.85	78.29	86.05	76.46	74.38	74.31	78.33
9.1951	9.1951	86.37	76.74	74.51	74.6	78.95	83.16	73.53	70.04	70.79	78.06	86.07	76.44	74.38	74.33	78.18
9.28798	9.28798	86.4	76.72	74.2	74.56	78.78	83.18	73.5	69.8	70.7	77.83	86.1	76.42	74.08	74.3	78.01
9.38086	9.38086	86.41	76.69	73.43	74.41	78.57	83.2	73.47	69.17	70.55	77.6	86.12	76.39	73.3	74.16	77.82
9.47374	9.47374	86.46	76.69	75.45	74.71	78.49	83.23	73.46	70.83	70.71	77.4	86.16	76.4	75.32	74.48	77.77
9.56662	9.56662	86.48	76.67	74.61	74.64	78.32	83.24	73.44	70.12	70.61	77.18	86.19	76.38	74.49	74.41	77.6
9.6595	9.6595	86.51	76.66	74.69	74.65	78.17	83.26	73.41	70.09	70.56	76.96	86.22	76.37	74.57	74.43	77.47
9.75238	9.75238	86.54	76.65	74.96	74.7	78.04	83.29	73.39	70.48	70.58	76.76	86.25	76.36	74.82	74.49	77.36
9.84526	9.84526	86.56	76.62	74.07	74.58	77.86	83.3	73.37	69.69	70.46	76.54	86.27	76.33	73.94	74.38	77.19
9.93814	9.93814	86.58	76.61	74.28	74.58	77.72	83.32	73.34	69.61	70.39	76.32	86.29	76.32	74.16	74.39	77.07
10.031	10.031	86.61	76.59	74.53	74.61	77.59	83.34	73.32	69.75	70.35	76.12	86.32	76.31	74.41	74.42	76.96
10.1239	10.1239	86.63	76.57	74.02	74.53	77.43	83.35	73.3	69.29	70.24	75.9	86.34	76.29	73.9	74.34	76.81
10.2168	10.2168	86.65	76.56	73.71	74.45	77.27	83.37	73.27	69.11	70.14	75.69	86.36	76.27	73.6	74.27	76.67
10.3097	10.3097	86.67	76.54	73.91	74.43	77.14	83.38	73.25	69.19	70.08	75.48	86.39	76.25	73.79	74.26	76.55
10.4025	10.4025	86.69	76.52	73.78	74.36	76.99	83.4	73.23	69.19	70.01	75.28	86.41	76.24	73.65	74.19	76.42
10.4954	10.4954	86.71	76.5	73.17	74.23	76.82	83.41	73.2	68.61	69.86	75.06	86.42	76.21	73.04	74.06	76.26
10.5883	10.5883	86.73	76.48	73.69	74.22	76.7	83.43	73.18	69.27	69.85	74.88	86.45	76.2	73.57	74.06	76.15
10.6812	10.6812	86.74	76.46	73.15	74.1	76.54	83.44	73.15	68.86	69.75	74.67	86.46	76.18	73.03	73.94	76
10.7741	10.7741	86.77	76.45	73.9	74.15	76.45	83.46	73.13	69.32	69.76	74.49	86.49	76.16	73.78	74	75.93
10.8669	10.8669	86.8	76.43	74.22	74.21	76.36	83.48	73.11	69.65	69.79	74.32	86.51	76.15	74.11	74.06	75.86
10.9598	10.9598	86.82	76.42	74.82	74.3	76.29	83.49	73.1	69.85	69.8	74.15	86.54	76.14	74.7	74.15	75.81
11.0527	11.0527	86.84	76.41	74.45	74.28	76.19	83.51	73.07	69.69	69.77	73.98	86.57	76.13	74.33	74.13	75.72
11.1456	11.1456	86.86	76.38	73.15	74.09	76.01	83.52	73.05	68.85	69.64	73.78	86.58	76.11	73.02	73.95	75.55
11.2385	11.2385	86.87	76.36	72.89	73.97	75.87	83.53	73.03	68.59	69.53	73.59	86.59	76.09	72.76	73.83	75.41
11.3313	11.3313	86.89	76.34	72.72	73.87	75.73	83.54	73	68.44	69.44	73.4	86.61	76.07	72.59	73.72	75.28
11.4242	11.4242	86.9	76.32	73.07	73.82	75.61	83.56	72.98	68.64	69.39	73.23	86.63	76.05	72.94	73.68	75.18
11.5171	11.5171	86.93	76.31	73.74	73.88	75.55	83.57	72.96	69.16	69.42	73.08	86.65	76.04	73.61	73.74	75.13
11.61	11.61	86.94	76.29	73.46	73.82	75.44	83.59	72.94	68.9	69.35	72.91	86.67	76.02	73.34	73.68	75.03
11.7029	11.7029	86.96	76.28	73.41	73.78	75.34	83.6	72.92	68.95	69.32	72.75	86.69	76	73.29	73.64	74.95
11.7957	11.7957	86.98	76.26	73.84	73.83	75.28	83.62	72.9	69.1	69.32	72.61	86.71	75.99	73.72	73.69	74.9
11.8886	11.8886	87	76.25	73.73	73.8	75.2	83.63	72.88	69.08	69.29	72.46	86.73	75.98	73.61	73.67	74.83
11.9815	11.9815	87.02	76.23	73.23	73.72	75.08	83.64	72.86	68.81	69.24	72.3	86.74	75.96	73.1	73.59	74.72
12.0744	12.0744	87.03	76.22	73.36	73.73	75.02	83.66	72.84	68.87	69.23	72.16	86.76	75.94	73.24	73.59	74.66
12.1673	12.1673	87.05	76.2	73.37	73.7	74.94	83.67	72.82	68.81	69.19	72.02	86.78	75.93	73.25	73.57	74.6
12.2601	12.2601	87.07	76.18	73.13	73.63	74.84	83.68	72.8	68.78	69.15	71.88	86.8	75.91	73.01	73.5	74.5
12.353	12.353	87.08	76.16	72.64	73.52	74.71	83.69	72.78	68.47	69.07	71.72	86.81	75.89	72.51	73.39	74.39
12.4459	12.4459	87.1	76.15	73.2	73.52	74.65	83.71	72.76	68.71	69.04	71.59	86.83	75.88	73.07	73.39	74.33
12.5388	12.5388	87.12	76.14	73.94	73.62	74.64	83.72	72.74	69.3	69.11	71.5	86.85	75.87	73.81	73.48	74.39
12.6317	12.6317	87.14	76.12	73.81	73.62	74.59	83.74	72.72	69.11	69.09	71.38	86.87	75.86	73.69	73.49	74.34
12.7245	12.7245	87.16	76.11	73.79	73.64	74.55	83.75	72.7	68.97	69.08	71.27	86.89	75.84	73.68	73.52	74.31
12.8174	12.8174	87.17	76.1	73.53	73.62	74.49	83.76	72.69	68.93	69.07	71.16	86.91	75.83	73.4	73.5	74.25
12.9103	12.9103	87.19	76.08	73.16	73.54	74.4	83.78	72.67	68.81	69.03	71.04	86.92	75.81	73.03	73.42	74.17
13.0032	13.0032	87.2	76.06	73.08	73.5	74.32	83.79	72.65	68.74	69	70.93	86.94	75.8	72.96	73.37	74.1
13.0961	13.0961	87.24	76.07	75.21	73.86	76.48	83.81	72.64	70.01	69.2	70.93	86.97	75.8	75.09	73.73	76.36
13.1889	13.1889	87.26	76.06	74.62	73.9	76.37	83.82	72.62	69.71	69.24	70.86	86.99	75.79	74.5	73.78	76.26
13.2818	13.2818	87.28	76.04	74.06	73.87	76.25	83.84	72.6	69.08	69.18	70.75	87.01	75.78	73.94	73.75	76.13
13.3747	13.3747	87.29	76.03	73.61	73.81	76.11	83.85	72.59	68.93	69.14	70.65	87.03	75.77	73.49	73.68	75.99
13.4676	13.4676	87.31	76.01	73.42	73.74	75.98	83.86	72.57	68.93	69.11	70.56	87.04	75.75	73.29	73.62	75.86
13.5605	13.5605	87.33	76.01	74.03	73.83	75.91	83.88	72.55	69.35	69.18	70.52	87.07	75.74	73.91	73.71	75.79
13.6533	13.6533	87.35	75.99	73.94	73.85	75.81	83.89	72.54	69.24	69.18	70.45	87.09	75.73	73.82	73.72	75.69
13.7462	13.7462	87.36	75.98	73.87	73.83	75.71	83.9	72.52	69.16	69.16	70.37	87.1	75.72	73.74	73.71	75.59
13.8391	13.8391	87.39	75.98	74.49	73.95	75.67	83.92	72.51	69.6	69.24	70.35	87.13	75.72	74.37	73.83	75.55
13.932	13.932	87.4	75.96	73.71	73.86	75.54	83.93	72.49	69.08	69.18	70.26	87.14	75.7	73.59	73.74	75.42
14.0249	14.0249	87.42	75.95	73.62	73.83	75.44	83.94	72.48	69.16	69.18	70.2	87.16	75.69	73.5	73.7	75.32
14.1177	14.1177	87.43	75.93	73.31	73.76	75.33	83.96	72.46	68.81	69.12	70.11	87.17	75.68	73.19	73.64	75.21
14.2106	14.2106	87.46	75.93	74.48	73.91	75.32	83.97	72.45	69.67	69.24	70.27	87.2	75.67	74.37	73.79	75.2
14.3035	14.3035	87.48	75.92	74.32	73.96	75.27	83.99	72.43	69.49	69.26	70.23	87.22	75.66	74.2	73.84	75.15
14.3964	14.3964	87.49	75.91	73.56	73.86	75.16	84	72.42	68.98	69.19	70.14	87.23	75.65	73.44	73.74	75.04
14.4893	14.4893	87.51	75.89	73.36	73.81	75.06	84.01	72.4	69.01	69.18	70.08	87.25	75.64	73.24	73.69	74.94
14.5821	14.5821	87.53	75.89	73.88	73.87	75.03	84.03	72.39	69.24	69.21	70.05	87.27	75.63	73.76	73.75	74.91
14.675	14.675	87.54	75.87	73.47	73.8	74.93	84.04	72.37	68.97	69.16	69.98	87.28	75.62	73.34	73.68	74.81
14.7679	14.7679	87.56	75.86	73.63	73.78	74.86	84.05	72.36	69.28	69.19	69.94	87.3	75.61	73.51	73.66	74.74
14.8608	14.8608	87.58	75.86	74.31	73.87	74.85	84.07	72.35	69.54	69.22	69.92	87.32	75.6	74.19	73.75	74.73
14.9537	14.9537	87.59	75.85	73.98	73.86	74.79	84.08	72.33	69.21	69.2	69.87	87.34	75.59	73.86	73.74	74.67
15.0465	15.0465	87.61	75.83	73.33	73.76	74.69	84.09	72.32	68.94	69.15	69.81	87.35	75.58	73.21	73.64	74.57
15.1394	15.1394	87.62	75.82	73.09	73.7	74.6	84.1	72.3	68.77	69.12	69.75	87.37	75.57	72.96	73.58	74.48
15.2323	15.2323	87.64	75.81	73.65	73.75	74.58	84.11	72.29	68.9	69.11	69.71	87.39	75.56	73.52	73.62	74.46
15.3252	15.3252	87.65	75.8	73.84	73.76	74.54	84.13	72.27	69.23	69.14	69.69	87.4	75.55	73.72	73.64	74.42
15.418	15.418	87.67	75.79	74.13	73.81	74.53	84.14	72.26	69.31	69.16	69.67	87.42	75.54	74.02	73.69	74.41
15.5109	15.5109	87.69	75.79	74.54	73.91	74.79	84.16	72.25	69.77	69.24	70.07	87.44	75.54	74.43	73.79	74.68
15.6038	15.6038	87.71	75.78	74.3	73.9	74.74	84.17	72.24	69.7	69.26	70.04	87.46	75.53	74.19	73.78	74.63
15.6967	15.6967	87.72	75.76	73.37	73.79	74.63	84.18	72.22	69.02	69.19	69.95	87.47	75.51	73.25	73.67	74.52
15.7896	15.7896	87.73	75.75	72.91	73.68	74.52	84.19	72.21	68.58	69.1	69.86	87.48	75.5	72.78	73.56	74.41
15.8824	15.8824	87.76	75.75	75.09	73.99	76.3	84.21	72.2	69.86	69.27	70.72	87.51	75.51	74.98	73.87	76.2
15.9753	15.9753	87.79	75.75	75.15	74.14	76.25	84.23	72.19	70.06	69.38	70.7	87.54	75.5	75.04	74.02	76.15
16.0682	16.0682	87.8	75.74	74.4	74.09	76.13	84.24	72.18	69.73	69.38	70.63	87.55	75.49	74.28	73.97	76.03
16.1611	16.1611	87.82	75.73	74.02	74.04	76.01	84.25	72.17	69.51	69.37	70.56	87.57	75.49	73.91	73.92	75.91
16.254	16.254	87.83	75.72	73.97	74.03	75.91	84.26	72.15	69.37	69.36	70.49	87.59	75.48	73.85	73.91	75.81
16.3468	16.3468	87.85	75.72	74.11	74.03	75.82	84.28	72.14	69.32	69.34	70.42	87.6	75.47	73.99	73.92	75.71
16.4397	16.4397	87.87	75.71	74.19	74.06	75.74	84.29	72.13	69.64	69.39	70.39	87.62	75.46	74.07	73.94	75.64
16.5326	16.5326	87.88	75.7	73.84	74	75.63	84.3	72.12	69.53	69.38	70.33	87.64	75.45	73.72	73.88	75.52
16.6255	16.6255	87.9	75.69	73.84	73.99	75.54	84.32	72.11	69.44	69.39	70.28	87.65	75.45	73.72	73.87	75.44
16.7184	16.7184	87.92	75.69	74.63	74.11	75.52	84.33	72.1	69.77	69.45	70.27	87.68	75.44	74.51	74	75.42
16.8112	16.8112	87.94	75.69	75.07	74.28	75.71	84.35	72.09	70.02	69.54	70.4	87.7	75.45	74.96	74.16	75.53
16.9041	16.9041	87.96	75.68	74.05	74.16	75.58	84.36	72.08	69.24	69.45	70.3	87.71	75.43	73.93	74.04	75.4
16.997	16.997	87.96	75.66	72.8	73.97	75.41	84.37	72.06	68.52	69.32	70.18	87.72	75.42	72.68	73.85	75.23
17.0899	17.0899	87.98	75.66	74.11	74.07	75.39	84.38	72.06	69.52	69.41	70.2	87.74	75.42	73.99	73.95	75.21
17.1828	17.1828	88	75.65	74.36	74.1	75.34	84.39	72.04	69.37	69.38	70.14	87.76	75.41	74.24	73.98	75.16
17.2756	17.2756	88.02	75.64	74.25	74.1	75.27	84.41	72.03	69.5	69.39	70.1	87.78	75.4	74.14	73.98	75.09
17.3685	17.3685	88.04	75.64	74.29	74.12	75.22	84.42	72.02	69.53	69.41	70.07	87.8	75.4	74.17	74	75.05
17.4614	17.4614	88.05	75.63	73.86	74.07	75.13	84.43	72.01	69.1	69.35	70.01	87.81	75.39	73.74	73.95	74.97
17.5543	17.5543	88.06	75.62	73.49	73.99	75.03	84.44	72	68.95	69.31	69.94	87.82	75.38	73.37	73.87	74.87
17.6472	17.6472	88.08	75.61	73.62	73.95	74.95	84.45	71.99	69	69.27	69.88	87.84	75.37	73.5	73.83	74.79
17.74	17.74	88.09	75.6	73.94	73.97	74.91	84.47	71.98	69.1	69.26	69.85	87.85	75.37	73.82	73.85	74.75
17.8329	17.8329	88.11	75.59	73.58	73.89	74.81	84.48	71.96	68.82	69.2	69.77	87.87	75.35	73.46	73.77	74.65
17.9258	17.9258	88.12	75.59	73.78	73.88	74.76	84.49	71.95	69.08	69.2	69.74	87.88	75.35	73.66	73.76	74.6
18.0187	18.0187	88.14	75.58	73.84	73.88	74.71	84.5	71.94	69.03	69.17	69.7	87.9	75.34	73.71	73.76	74.55
18.1116	18.1116	88.15	75.57	73.52	73.83	74.64	84.51	71.93	68.85	69.13	69.64	87.91	75.33	73.39	73.71	74.48
18.2044	18.2044	88.16	75.56	73.04	73.74	74.54	84.52	71.92	68.59	69.08	69.58	87.92	75.32	72.91	73.62	74.39
18.2973	18.2973	88.18	75.55	73.64	73.76	74.51	84.53	71.91	68.95	69.08	69.55	87.94	75.32	73.51	73.64	74.36
18.3902	18.3902	88.2	75.56	75.4	74.11	76.4	84.55	71.9	70.11	69.3	70.79	87.97	75.32	75.29	73.99	76.22
18.4831	18.4831	88.22	75.55	74.44	74.05	76.26	84.56	71.89	69.35	69.24	70.68	87.98	75.31	74.32	73.93	76.09
18.576	18.576	88.23	75.54	74.15	74.04	76.15	84.57	71.88	69.12	69.22	70.6	88	75.31	74.04	73.92	75.98
18.6688	18.6688	88.25	75.54	74.08	74.03	76.05	84.58	71.87	69.05	69.19	70.51	88.01	75.3	73.96	73.91	75.87
18.7617	18.7617	88.26	75.53	73.83	74	75.93	84.59	71.86	69.05	69.19	70.44	88.03	75.29	73.71	73.88	75.76
18.8546	18.8546	88.28	75.52	73.99	74.01	75.85	84.61	71.85	69.34	69.23	70.4	88.04	75.29	73.87	73.9	75.68
18.9475	18.9475	88.29	75.52	73.93	74.01	75.75	84.62	71.84	69.37	69.25	70.34	88.06	75.28	73.82	73.89	75.59
19.0404	19.0404	88.3	75.51	73.27	73.9	75.62	84.63	71.83	68.88	69.18	70.25	88.07	75.27	73.15	73.78	75.45
19.1332	19.1332	88.32	75.5	73.36	73.87	75.52	84.64	71.82	69.27	69.22	70.22	88.08	75.27	73.23	73.75	75.35
19.2261	19.2261	88.33	75.49	73.74	73.87	75.43	84.65	71.81	69.42	69.24	70.17	88.1	75.26	73.62	73.75	75.27
19.319	19.319	88.35	75.49	74.51	74	75.42	84.67	71.81	69.88	69.35	70.35	88.12	75.26	74.4	73.89	75.26
19.4119	19.4119	88.36	75.48	73.58	73.9	75.3	84.68	71.8	69.16	69.28	70.26	88.13	75.25	73.46	73.78	75.14
19.5048	19.5048	88.37	75.47	73.66	73.87	75.21	84.69	71.79	69.07	69.24	70.18	88.14	75.24	73.53	73.75	75.05
19.5976	19.5976	88.39	75.46	73.39	73.81	75.11	84.7	71.78	68.95	69.21	70.11	88.16	75.23	73.27	73.69	74.95
19.6905	19.6905	88.4	75.45	73.09	73.73	75	84.71	71.77	68.89	69.18	70.05	88.17	75.22	72.97	73.61	74.85
19.7834	19.7834	88.41	75.45	73.06	73.68	74.91	84.72	71.76	68.64	69.12	69.97	88.18	75.22	72.94	73.56	74.75
19.8763	19.8763	88.42	75.44	73.45	73.68	74.85	84.73	71.75	68.88	69.11	69.91	88.19	75.21	73.32	73.56	74.69
19.9692	19.9692	88.43	75.43	72.81	73.58	74.73	84.74	71.74	68.64	69.06	69.84	88.2	75.2	72.68	73.45	74.57
20.062	20.062	88.45	75.42	73.32	73.6	74.68	84.75	71.73	68.83	69.05	69.79	88.22	75.19	73.2	73.48	74.53
20.1549	20.1549	88.46	75.41	73.22	73.54	74.59	84.76	71.72	68.88	69.03	69.74	88.23	75.19	73.1	73.42	74.44
20.2478	20.2478	88.47	75.41	73.47	73.55	74.54	84.77	71.71	69.12	69.06	69.72	88.24	75.18	73.35	73.42	74.39
20.3407	20.3407	88.49	75.4	73.89	73.62	74.52	84.78	71.7	69.44	69.13	69.83	88.26	75.17	73.77	73.5	74.37
20.4336	20.4336	88.5	75.4	73.99	73.66	74.49	84.8	71.69	69.51	69.17	69.82	88.27	75.17	73.86	73.54	74.35
20.5264	20.5264	88.52	75.39	73.9	73.69	74.46	84.81	71.69	69.36	69.18	69.79	88.29	75.16	73.77	73.56	74.32
20.6193	20.6193	88.53	75.39	74.43	73.79	74.71	84.82	71.68	69.78	69.26	69.98	88.3	75.16	74.32	73.67	74.6
20.7122	20.7122	88.54	75.38	73.56	73.69	74.61	84.83	71.67	69.02	69.18	69.89	88.32	75.15	73.44	73.57	74.49
20.8051	20.8051	88.56	75.38	73.98	73.75	74.59	84.84	71.66	69.39	69.22	69.88	88.33	75.15	73.86	73.63	74.47
20.898	20.898	88.57	75.37	73.77	73.73	74.53	84.85	71.65	69.23	69.21	69.83	88.34	75.14	73.65	73.61	74.42
20.9908	20.9908	88.58	75.36	73.72	73.73	74.49	84.86	71.64	69.17	69.21	69.8	88.36	75.14	73.6	73.61	74.38
21.0837	21.0837	88.6	75.36	74.48	73.85	74.92	84.88	71.64	69.65	69.27	69.92	88.38	75.14	74.36	73.73	74.8
21.1766	21.1766	88.62	75.36	74.31	73.88	74.88	84.89	71.63	69.81	69.34	69.96	88.39	75.13	74.19	73.76	74.76
21.2695	21.2695	88.63	75.35	73.68	73.82	74.79	84.9	71.62	69.27	69.29	69.9	88.4	75.12	73.55	73.7	74.67
21.3624	21.3624	88.64	75.34	73.3	73.74	74.69	84.91	71.61	68.85	69.23	69.83	88.41	75.12	73.18	73.62	74.57
21.4552	21.4552	89.59	76.28	90.86	82.94	92.93	86.38	73.07	89.34	81.15	91.39	89.24	75.93	89.94	82.15	92.09
21.5481	21.5481	90.06	76.73	90.56	84.45	92.82	87.04	73.7	88.88	82.69	91.27	89.66	76.32	89.63	83.59	91.98
21.641	21.641	90.11	76.76	87.73	84.22	92.57	87.09	73.73	85.95	82.41	91.02	89.7	76.34	86.82	83.36	91.72
21.7339	21.7339	90.13	76.75	84.81	83.88	92.31	87.1	73.72	82.87	82.04	90.75	89.71	76.34	83.96	83.04	91.46
21.8268	21.8268	90.13	76.74	81.92	83.52	92.04	87.1	73.71	79.84	81.66	90.48	89.72	76.33	81.13	82.68	91.2
21.9196	21.9196	90.25	76.84	84.48	83.66	91.83	87.27	73.86	82.87	81.85	90.27	89.82	76.41	83.3	82.77	90.98
22.0125	22.0125	92.03	78.61	95.11	88.61	97.64	89.89	76.47	94.27	87.52	96.79	91.51	78.08	94.41	87.85	96.93
22.1054	22.1054	92.43	78.98	93.47	89.05	97.44	90.4	76.96	92.57	87.97	96.6	91.84	78.4	92.6	88.2	96.73
22.1983	22.1983	92.44	78.98	90.34	88.67	97.18	90.41	76.95	89.38	87.58	96.33	91.86	78.39	89.48	87.83	96.46
22.2912	22.2912	92.44	78.96	87.22	88.28	96.91	90.41	76.93	86.2	87.19	96.06	91.86	78.38	86.38	87.44	96.19
22.384	22.384	92.45	78.95	84.17	87.89	96.64	90.42	76.92	83.06	86.79	95.79	91.87	78.37	83.36	87.05	95.93
22.4769	22.4769	92.45	78.94	81.28	87.5	96.37	90.42	76.9	80	86.39	95.52	91.87	78.35	80.52	86.67	95.66
22.5698	22.5698	92.46	78.92	78.84	87.12	96.11	90.42	76.89	77.12	86	95.26	91.88	78.34	78.2	86.28	95.39
22.6627	22.6627	92.46	78.91	76.86	86.73	95.84	90.43	76.87	74.56	85.6	94.99	91.88	78.33	76.36	85.9	95.12
22.7556	22.7556	92.47	78.9	75.27	86.35	95.57	90.43	76.86	72.41	85.2	94.72	91.89	78.32	74.89	85.52	94.86
22.8484	22.8484	92.48	78.89	74.94	85.97	95.3	90.43	76.84	71.08	84.81	94.45	91.9	78.31	74.69	85.15	94.59
22.9413	22.9413	92.92	79.31	91.18	87.38	95.2	90.88	77.28	89.17	85.96	94.31	92.34	78.74	90.65	86.66	94.49
23.0342	23.0342	93.22	79.6	91.41	88	95.06	91.21	77.58	89.59	86.53	94.15	92.62	79	90.64	87.24	94.34
23.1271	23.1271	93.25	79.6	88.55	87.69	94.8	91.24	77.59	86.72	86.21	93.89	92.65	79	87.75	86.92	94.09
23.22	23.22	93.25	79.59	85.5	87.31	94.53	91.24	77.58	83.58	85.82	93.62	92.65	78.99	84.73	86.54	93.82
23.3128	23.3128	93.26	79.58	82.64	86.93	94.27	91.24	77.56	80.54	85.42	93.35	92.66	78.98	81.92	86.16	93.55
23.4057	23.4057	93.26	79.57	80.07	86.54	94	91.24	77.55	77.65	85.03	93.08	92.66	78.97	79.45	85.78	93.29
23.4986	23.4986	93.27	79.56	78.21	86.17	93.74	91.25	77.54	75.2	84.64	92.82	92.67	78.96	77.73	85.42	93.02
23.5915	23.5915	93.9	80.18	93.38	88.47	95.62	92.06	78.33	92.51	87.25	94.74	93.27	79.54	92.52	87.65	94.74
23.6844	23.6844	94.48	80.73	94.43	89.86	95.69	92.72	78.98	93.35	88.65	94.73	93.82	80.08	93.61	89.05	94.94
23.7772	23.7772	94.49	80.73	91.32	89.49	95.43	92.73	78.97	90.19	88.27	94.47	93.84	80.08	90.53	88.69	94.68
23.8701	23.8701	94.5	80.72	88.19	89.1	95.16	92.73	78.95	87.01	87.87	94.2	93.84	80.06	87.41	88.3	94.42
23.963	23.963	94.5	80.7	85.18	88.71	94.9	92.73	78.94	83.88	87.48	93.93	93.85	80.05	84.44	87.92	94.15
24.0559	24.0559	94.5	80.69	82.3	88.33	94.63	92.73	78.92	80.82	87.08	93.66	93.85	80.04	81.61	87.53	93.88
24.1488	24.1488	94.51	80.68	79.67	87.94	94.36	92.74	78.91	77.91	86.68	93.39	93.86	80.03	79.06	87.14	93.62
24.2416	24.2416	94.51	80.67	77.57	87.55	94.1	92.74	78.89	75.28	86.29	93.13	93.86	80.01	77.07	86.76	93.35
24.3345	24.3345	94.51	80.65	76.1	87.17	93.83	92.74	78.88	73.17	85.89	92.86	93.86	80	75.74	86.38	93.09
24.4274	24.4274	94.52	80.64	76.98	86.8	93.57	92.75	78.87	74.3	85.52	92.59	93.87	79.99	76.68	86.02	92.82
24.5203	24.5203	94.84	80.95	90.82	88.09	93.75	93.12	79.23	89.67	86.88	92.66	94.17	80.28	89.86	87.25	92.82
24.6132	24.6132	94.95	81.04	89.77	88.18	93.57	93.23	79.32	88.47	86.94	92.48	94.26	80.35	88.62	87.27	92.63
24.706	24.706	94.96	81.03	86.75	87.8	93.31	93.24	79.31	85.35	86.55	92.21	94.27	80.34	85.65	86.9	92.37
24.7989	24.7989	94.96	81.02	83.86	87.42	93.05	93.24	79.29	82.26	86.15	91.94	94.27	80.33	82.84	86.53	92.1
24.8918	24.8918	94.96	81	81.08	87.04	92.78	93.24	79.28	79.27	85.76	91.67	94.27	80.31	80.17	86.15	91.84
24.9847	24.9847	94.97	80.99	78.58	86.65	92.51	93.24	79.27	76.47	85.36	91.41	94.28	80.3	77.79	85.76	91.57
25.0776	25.0776	95.01	81.02	84.69	86.6	92.31	93.3	79.31	83.68	85.34	91.2	94.32	80.33	83.51	85.68	91.36
25.1704	25.1704	95.72	81.71	94.95	89.75	96.96	94.1	80.09	93.88	88.58	95.82	95.01	81	94.14	88.91	96.03
25.2633	25.2633	95.88	81.86	93.28	89.98	96.77	94.29	80.27	92.27	88.85	95.65	95.15	81.13	92.34	89.08	95.84
25.3562	25.3562	95.89	81.84	90.14	89.59	96.5	94.3	80.26	89.08	88.45	95.38	95.16	81.12	89.21	88.69	95.57
25.4491	25.4491	95.89	81.83	87.03	89.2	96.24	94.3	80.24	85.9	88.06	95.11	95.16	81.1	86.12	88.3	95.31
25.5419	25.5419	95.89	81.82	84.15	88.82	95.97	94.3	80.23	82.81	87.66	94.84	95.17	81.09	83.32	87.92	95.04
25.6348	25.6348	95.9	81.81	81.47	88.43	95.7	94.3	80.21	79.83	87.26	94.57	95.17	81.08	80.72	87.54	94.77
25.7277	25.7277	95.9	81.79	79.19	88.05	95.44	94.3	80.2	77.07	86.87	94.31	95.17	81.07	78.58	87.16	94.51
25.8206	25.8206	95.9	81.78	77.28	87.66	95.17	94.3	80.18	74.63	86.47	94.04	95.18	81.06	76.8	86.78	94.24
25.9135	25.9135	95.9	81.77	75.65	87.27	94.9	94.31	80.17	72.61	86.08	93.77	95.18	81.04	75.29	86.39	93.97
26.0063	26.0063	95.91	81.75	74.29	86.88	94.64	94.31	80.16	70.86	85.68	93.5	95.18	81.03	74	86.01	93.71
26.0992	26.0992	95.91	81.74	73.76	86.5	94.37	94.31	80.14	70.07	85.29	93.23	95.18	81.02	73.56	85.63	93.44
26.1921	26.1921	95.91	81.73	73.76	86.12	94.1	94.31	80.13	69.74	84.89	92.97	95.19	81	73.61	85.25	93.17
26.285	26.285	95.91	81.71	72.87	85.73	93.84	94.31	80.11	68.95	84.5	92.7	95.19	80.99	72.72	84.87	92.91
26.3779	26.3779	95.91	81.7	71.85	85.34	93.57	94.31	80.1	68.3	84.11	92.43	95.19	80.98	71.7	84.48	92.64
26.4707	26.4707	95.92	81.69	72.98	84.97	93.3	94.31	80.08	68.59	83.71	92.16	95.19	80.96	72.83	84.11	92.38
26.5636	26.5636	95.92	81.68	73.31	84.59	93.04	94.31	80.07	68.77	83.33	91.89	95.2	80.95	73.18	83.74	92.11
26.6565	26.6565	95.92	81.66	73.73	84.23	92.77	94.31	80.06	69.02	82.94	91.63	95.2	80.94	73.6	83.39	91.85
26.7494	26.7494	95.92	81.65	73.72	83.86	92.51	94.32	80.04	69.07	82.55	91.36	95.2	80.93	73.6	83.03	91.58
26.8423	26.8423	95.93	81.64	74.17	83.51	92.24	94.32	80.03	69.45	82.17	91.09	95.2	80.92	74.05	82.68	91.32
26.9351	26.9351	95.93	81.63	73.9	83.15	91.98	94.32	80.02	69.08	81.79	90.83	95.21	80.9	73.78	82.33	91.05
27.028	27.028	95.93	81.61	74.49	82.81	91.71	94.32	80	69.38	81.41	90.56	95.21	80.89	74.37	82	90.79
27.1209	27.1209	95.93	81.6	73.69	82.45	91.45	94.32	79.99	69	81.03	90.29	95.21	80.88	73.57	81.65	90.53
27.2138	27.2138	95.94	81.59	73.6	82.1	91.18	94.32	79.97	69.08	80.65	90.02	95.22	80.87	73.48	81.3	90.26
27.3067	27.3067	95.94	81.58	73.23	81.74	90.92	94.32	79.96	69.11	80.28	89.76	95.22	80.86	73.1	80.96	90
27.3995	27.3995	95.94	81.56	73.2	81.4	90.65	94.32	79.95	69.05	79.91	89.49	95.22	80.84	73.07	80.62	89.73
27.4924	27.4924	95.94	81.55	73.09	81.05	90.39	94.33	79.93	69.07	79.54	89.22	95.22	80.83	72.97	80.29	89.47
27.5853	27.5853	95.94	81.54	73.68	80.73	90.13	94.33	79.92	69.2	79.17	88.96	95.23	80.82	73.55	79.98	89.21
27.6782	27.6782	95.95	81.53	73.42	80.41	89.86	94.33	79.91	68.82	78.81	88.69	95.23	80.81	73.3	79.66	88.95
27.7711	27.7711	95.95	81.51	73.66	80.09	89.6	94.33	79.89	69.08	78.45	88.43	95.23	80.8	73.54	79.37	88.69
27.8639	27.8639	95.95	81.5	73.99	79.8	89.34	94.33	79.88	69.65	78.11	88.16	95.23	80.78	73.88	79.09	88.43
27.9568	27.9568	95.95	81.49	73.9	79.51	89.08	94.33	79.87	69.54	77.76	87.9	95.24	80.77	73.79	78.81	88.17
28.0497	28.0497	95.96	81.48	74.62	79.25	88.82	94.33	79.85	69.96	77.43	87.63	95.24	80.76	74.51	78.58	87.91
28.1426	28.1426	95.96	81.47	75.33	79.02	88.57	94.34	79.84	70.16	77.11	87.37	95.25	80.75	75.22	78.37	87.66
28.2355	28.2355	95.96	81.46	74.6	78.74	88.31	94.34	79.83	69.77	76.77	87.1	95.25	80.74	74.49	78.11	87.4
28.3283	28.3283	95.97	81.44	74.36	78.49	88.05	94.34	79.82	69.63	76.45	86.84	95.25	80.73	74.25	77.88	87.15
28.4212	28.4212	95.97	81.43	74.05	78.23	87.79	94.34	79.8	69.49	76.13	86.58	95.25	80.72	73.94	77.63	86.89
28.5141	28.5141	95.97	81.42	74.65	78.03	87.54	94.34	79.79	69.64	75.82	86.31	95.26	80.71	74.53	77.45	86.64
28.607	28.607	95.98	81.41	74.66	77.82	87.28	94.34	79.78	69.72	75.53	86.05	95.26	80.7	74.55	77.27	86.39
28.6999	28.6999	95.98	81.4	73.74	77.55	87.02	94.34	79.76	69.01	75.2	85.79	95.26	80.68	73.63	77.01	86.13
28.7927	28.7927	95.98	81.39	73.64	77.31	86.77	94.34	79.75	69.11	74.9	85.52	95.27	80.67	73.52	76.78	85.88
28.8856	28.8856	95.98	81.38	74.06	77.11	86.51	94.35	79.74	69.31	74.61	85.26	95.27	80.66	73.95	76.6	85.63
28.9785	28.9785	95.99	81.36	74.32	76.93	86.26	94.35	79.73	69.49	74.34	85	95.27	80.65	74.2	76.44	85.38
29.0714	29.0714	95.99	81.35	73.64	76.69	86	94.35	79.71	69.15	74.05	84.74	95.27	80.64	73.52	76.22	85.12
29.1643	29.1643	95.99	81.34	73.22	76.45	85.75	94.35	79.7	68.81	73.76	84.47	95.28	80.63	73.09	75.99	84.87
29.2571	29.2571	95.99	81.33	74.49	76.37	85.51	94.35	79.69	69.57	73.55	84.22	95.28	80.62	74.37	75.94	84.63
29.35	29.35	96	81.32	74.37	76.24	85.26	94.35	79.68	69.7	73.33	83.96	95.28	80.61	74.26	75.82	84.39
29.4429	29.4429	96	81.31	74.13	76.06	85.01	94.35	79.66	69.51	73.09	83.7	95.29	80.6	74.02	75.67	84.14
29.5358	29.5358	96	81.3	74.02	75.91	84.76	94.35	79.65	69.3	72.85	83.44	95.29	80.59	73.9	75.53	83.9
29.6287	29.6287	96	81.29	73.05	75.67	84.51	94.36	79.64	68.67	72.58	83.18	95.29	80.57	72.93	75.3	83.65
29.7215	29.7215	96.01	81.27	74.13	75.61	84.27	94.36	79.63	69.42	72.41	82.92	95.3	80.56	74.01	75.26	83.42
29.8144	29.8144	96.01	81.26	74.13	75.51	84.03	94.36	79.61	69.48	72.22	82.67	95.3	80.55	74.01	75.17	83.18
29.9073	29.9073	96.01	81.25	73.89	75.38	83.79	94.36	79.6	69.42	72.04	82.41	95.3	80.54	73.77	75.06	82.94
30.0002	30.0002	96.01	81.24	74.13	75.29	83.55	94.36	79.59	69.41	71.86	82.16	95.3	80.53	74.01	74.98	82.71
30.0931	30.0931	96.02	81.23	73.91	75.18	83.31	94.36	79.58	69.45	71.7	81.9	95.31	80.52	73.79	74.88	82.47
30.1859	30.1859	96.02	81.22	74.55	75.16	83.08	94.36	79.57	69.77	71.57	81.65	95.31	80.51	74.44	74.88	82.25
30.2788	30.2788	96.02	81.21	74.12	75.05	82.84	94.36	79.55	69.47	71.4	81.4	95.31	80.5	74	74.78	82.02
30.3717	30.3717	96.02	81.2	73.89	74.95	82.61	94.37	79.54	69.36	71.25	81.15	95.32	80.49	73.78	74.69	81.79
30.4646	30.4646	96.03	81.19	73.99	74.87	82.38	94.37	79.53	69.4	71.11	80.9	95.32	80.48	73.88	74.63	81.57
30.5575	30.5575	96.03	81.18	74.2	74.84	82.15	94.37	79.52	69.49	71	80.65	95.32	80.47	74.08	74.6	81.35
30.6503	30.6503	96.03	81.17	73.65	74.72	81.92	94.37	79.51	69.15	70.85	80.4	95.32	80.46	73.53	74.49	81.13
30.7432	30.7432	96.03	81.16	73.4	74.6	81.69	94.37	79.49	68.93	70.71	80.15	95.33	80.45	73.28	74.38	80.9
30.8361	30.8361	96.04	81.15	74.23	74.64	81.48	94.37	79.48	69.56	70.66	79.91	95.33	80.44	74.12	74.43	80.7
30.929	30.929	96.04	81.14	74.07	74.57	81.25	94.37	79.47	69.39	70.55	79.66	95.33	80.43	73.95	74.36	80.48
31.0219	31.0219	96.04	81.12	74.38	74.57	81.05	94.38	79.46	69.53	70.48	79.42	95.34	80.42	74.26	74.38	80.29
31.1147	31.1147	96.04	81.12	74.79	74.63	80.85	94.38	79.45	69.75	70.43	79.18	95.34	80.41	74.67	74.44	80.1
31.2076	31.2076	96.05	81.1	74.24	74.56	80.63	94.38	79.44	69.54	70.36	78.94	95.34	80.4	74.13	74.38	79.89
31.3005	31.3005	96.05	81.09	73.55	74.42	80.41	94.38	79.42	69.05	70.22	78.7	95.35	80.39	73.43	74.24	79.67
31.3934	31.3934	96.05	81.08	73.23	74.31	80.19	94.38	79.41	68.86	70.1	78.46	95.35	80.38	73.11	74.13	79.46
31.4863	31.4863	96.05	81.07	73.23	74.23	79.98	94.38	79.4	68.7	69.99	78.22	95.35	80.37	73.1	74.05	79.26
31.5791	31.5791	96.06	81.06	72.87	74.12	79.76	94.38	79.39	68.62	69.89	77.98	95.35	80.36	72.75	73.95	79.05
31.672	31.672	96.06	81.05	72.84	74.02	79.55	94.38	79.38	68.57	69.79	77.74	95.35	80.35	72.71	73.85	78.84
31.7649	31.7649	96.06	81.04	74.29	74.12	79.38	94.38	79.37	69.6	69.82	77.52	95.36	80.34	74.17	73.96	78.69
31.8578	31.8578	96.06	81.03	73.35	73.98	79.16	94.39	79.35	68.96	69.7	77.28	95.36	80.33	73.23	73.82	78.48
31.9507	31.9507	96.06	81.02	73.53	73.96	78.97	94.39	79.34	69.38	69.71	77.07	95.36	80.32	73.42	73.81	78.3
32.0435	32.0435	96.07	81.01	74	74	78.8	94.39	79.33	69.6	69.72	76.85	95.37	80.31	73.89	73.85	78.14
32.1364	32.1364	96.07	81	73.13	73.86	78.59	94.39	79.32	68.96	69.61	76.62	95.37	80.3	73	73.71	77.94
32.2293	32.2293	96.07	80.99	73.86	73.9	78.42	94.39	79.31	69.47	69.62	76.4	95.37	80.29	73.73	73.75	77.78
32.3222	32.3222	96.07	80.98	74.38	74.01	78.27	94.39	79.3	69.59	69.63	76.2	95.37	80.28	74.27	73.86	77.65
32.4151	32.4151	96.08	80.97	74.16	74	78.11	94.39	79.29	69.62	69.64	75.99	95.38	80.27	74.05	73.86	77.5
32.5079	32.5079	96.08	80.96	73.97	73.99	77.94	94.39	79.27	69.37	69.59	75.78	95.38	80.26	73.85	73.85	77.34
32.6008	32.6008	96.08	80.95	73.82	73.97	77.78	94.4	79.26	69.09	69.53	75.56	95.38	80.25	73.7	73.83	77.19
32.6937	32.6937	96.08	80.94	74.18	74.01	77.63	94.4	79.25	69.27	69.52	75.36	95.39	80.24	74.07	73.87	77.06
32.7866	32.7866	96.09	80.93	74.84	74.15	77.53	94.4	79.24	69.82	69.59	75.18	95.39	80.23	74.73	74.02	76.97
32.8795	32.8795	96.09	80.92	74.59	74.17	77.39	94.4	79.23	69.7	69.59	74.98	95.39	80.22	74.47	74.04	76.85
32.9723	32.9723	96.09	80.91	74.19	74.14	77.24	94.4	79.22	69.31	69.55	74.79	95.4	80.21	74.07	74.01	76.71
33.0652	33.0652	96.09	80.9	73.4	74.02	77.07	94.4	79.21	68.91	69.47	74.58	95.4	80.2	73.28	73.89	76.55
33.1581	33.1581	96.1	80.89	74.63	74.15	76.98	94.4	79.2	69.87	69.57	74.42	95.4	80.2	74.51	74.02	76.48
33.251	33.251	96.1	80.88	74.96	74.29	76.9	94.41	79.19	70.03	69.64	74.26	95.41	80.19	74.85	74.16	76.42
33.3439	33.3439	96.1	80.87	74.57	74.29	76.78	94.41	79.18	69.69	69.63	74.08	95.41	80.18	74.45	74.17	76.31
33.4367	33.4367	96.11	80.86	73.32	74.12	76.6	94.41	79.17	68.89	69.5	73.88	95.41	80.17	73.2	74	76.14
33.5296	33.5296	96.11	80.85	73.89	74.15	76.5	94.41	79.15	69.11	69.49	73.71	95.41	80.16	73.77	74.02	76.05
33.6225	33.6225	96.11	80.84	73.82	74.1	76.37	94.41	79.14	69.33	69.48	73.54	95.42	80.15	73.7	73.97	75.93
33.7154	33.7154	96.11	80.84	74.64	74.23	76.32	94.41	79.13	69.79	69.56	73.4	95.42	80.14	74.53	74.11	75.89
33.8083	33.8083	96.12	80.83	74.98	74.31	76.25	94.41	79.12	70.05	69.62	73.26	95.42	80.13	74.87	74.19	75.84
33.9011	33.9011	96.12	80.82	74.82	74.34	76.17	94.41	79.11	69.85	69.62	73.11	95.43	80.12	74.71	74.22	75.77
33.994	33.994	96.12	80.81	74.11	74.27	76.05	94.42	79.1	69.35	69.56	72.95	95.43	80.12	74	74.15	75.66
34.0869	34.0869	96.12	80.8	72.93	74.08	75.87	94.42	79.09	68.56	69.42	72.76	95.43	80.1	72.8	73.96	75.49
34.1798	34.1798	96.13	80.79	74.35	74.2	75.84	94.42	79.08	69.74	69.53	72.65	95.43	80.1	74.24	74.08	75.47
34.2727	34.2727	96.13	80.78	73.94	74.15	75.73	94.42	79.07	69.34	69.48	72.5	95.44	80.09	73.82	74.02	75.37
34.3655	34.3655	96.13	80.77	73.17	74.01	75.59	94.42	79.06	68.64	69.37	72.33	95.44	80.08	73.04	73.89	75.24
34.4584	34.4584	96.13	80.76	73.7	74.02	75.51	94.42	79.05	69.11	69.37	72.2	95.44	80.07	73.58	73.9	75.17
34.5513	34.5513	96.14	80.75	74.29	74.09	75.47	94.42	79.04	69.59	69.44	72.09	95.45	80.06	74.17	73.97	75.14
34.6442	34.6442	96.14	80.74	73.98	74.04	75.37	94.42	79.03	69.46	69.41	71.96	95.45	80.05	73.87	73.92	75.05
34.7371	34.7371	96.14	80.73	74.09	74.04	75.3	94.43	79.02	69.31	69.38	71.84	95.45	80.04	73.97	73.92	74.99
34.8299	34.8299	96.14	80.72	74.16	74.06	75.24	94.43	79.01	69.58	69.43	71.74	95.45	80.03	74.05	73.94	74.94
34.9228	34.9228	96.15	80.72	74.25	74.07	75.19	94.43	79	69.78	69.47	71.65	95.46	80.03	74.14	73.95	74.9
35.0157	35.0157	96.15	80.71	74.3	74.1	75.14	94.43	78.99	69.66	69.48	71.55	95.46	80.02	74.19	73.98	74.86
35.1086	35.1086	96.15	80.7	73.74	74.03	75.05	94.43	78.98	69.17	69.42	71.42	95.46	80.01	73.62	73.91	74.77
35.2015	35.2015	96.15	80.69	73.63	73.99	74.97	94.43	78.97	69.26	69.41	71.32	95.46	80	73.51	73.87	74.71
35.2943	35.2943	96.16	80.68	73.97	73.99	74.92	94.43	78.96	69.34	69.4	71.22	95.47	79.99	73.85	73.87	74.66
35.3872	35.3872	96.16	80.67	73.81	73.98	74.86	94.43	78.95	69.06	69.35	71.11	95.47	79.98	73.69	73.86	74.61
35.4801	35.4801	96.16	80.66	73.39	73.88	74.76	94.44	78.94	68.8	69.27	70.99	95.47	79.97	73.26	73.76	74.51
35.573	35.573	96.16	80.65	74.43	74.01	75.17	94.44	78.93	69.41	69.33	70.92	95.48	79.96	74.32	73.89	75.06
35.6658	35.6658	96.17	80.64	74.75	74.11	75.16	94.44	78.92	69.69	69.38	70.87	95.48	79.96	74.64	73.99	75.05
35.7587	35.7587	96.17	80.64	74.66	74.13	75.12	94.44	78.91	69.7	69.4	70.8	95.48	79.95	74.54	74.02	75.01
35.8516	35.8516	96.17	80.63	74.11	74.1	75.04	94.44	78.9	69.34	69.37	70.71	95.48	79.94	73.99	73.98	74.93
35.9445	35.9445	96.17	80.62	75.2	74.28	75.84	94.44	78.89	70.1	69.49	70.71	95.49	79.93	75.08	74.17	75.73
36.0374	36.0374	96.18	80.61	74.57	74.27	75.76	94.44	78.88	69.71	69.49	70.64	95.49	79.92	74.46	74.15	75.64
36.1302	36.1302	96.18	80.6	74.83	74.33	75.71	94.45	78.87	69.98	69.55	70.61	95.5	79.92	74.72	74.21	75.59
36.2231	36.2231	96.18	80.59	74.63	74.34	75.64	94.45	78.86	69.88	69.57	70.57	95.5	79.91	74.52	74.22	75.53
36.316	36.316	96.19	80.58	74.07	74.3	75.55	94.45	78.85	69.53	69.56	70.51	95.5	79.9	73.96	74.18	75.44
36.4089	36.4089	96.19	80.58	73.52	74.21	75.44	94.45	78.84	69.15	69.51	70.43	95.5	79.89	73.4	74.09	75.33
36.5018	36.5018	96.19	80.57	73.88	74.22	75.38	94.45	78.83	69.4	69.53	70.39	95.51	79.88	73.77	74.11	75.27
36.5946	36.5946	96.19	80.56	74.76	74.36	75.56	94.45	78.82	69.89	69.62	70.4	95.51	79.88	74.65	74.24	75.45
36.6875	36.6875	96.2	80.55	74.65	74.38	75.51	94.45	78.81	69.84	69.64	70.37	95.51	79.87	74.54	74.27	75.4
36.7804	36.7804	96.2	80.54	74.19	74.32	75.42	94.45	78.8	69.42	69.58	70.3	95.52	79.86	74.07	74.2	75.31
36.8733	36.8733	96.2	80.53	73.89	74.26	75.33	94.46	78.79	69.2	69.54	70.23	95.52	79.85	73.77	74.15	75.22
36.9662	36.9662	96.2	80.53	73.89	74.23	75.26	94.46	78.78	69.31	69.53	70.19	95.52	79.84	73.78	74.12	75.14
37.059	37.059	96.21	80.52	74.15	74.24	75.21	94.46	78.77	69.35	69.52	70.14	95.52	79.84	74.03	74.13	75.09
37.1519	37.1519	96.21	80.51	74.06	74.21	75.14	94.46	78.76	69.38	69.5	70.1	95.53	79.83	73.94	74.1	75.02
37.2448	37.2448	96.21	80.5	75.55	74.49	76.65	94.46	78.75	70.38	69.68	71.18	95.53	79.82	75.44	74.38	76.48
37.3377	37.3377	96.22	80.49	74.63	74.44	76.53	94.46	78.74	69.8	69.65	71.09	95.53	79.81	74.52	74.32	76.35
37.4306	37.4306	96.22	80.49	74.4	74.41	76.41	94.46	78.73	69.69	69.64	71.01	95.54	79.81	74.29	74.29	76.24
37.5234	37.5234	96.22	80.48	73.99	74.32	76.28	94.46	78.72	69.52	69.6	70.92	95.54	79.8	73.87	74.21	76.11
37.6163	37.6163	96.22	80.47	73.78	74.26	76.16	94.47	78.71	69.4	69.57	70.83	95.54	79.79	73.67	74.15	75.99
37.7092	37.7092	96.22	80.46	73.76	74.23	76.05	94.47	78.7	69.22	69.53	70.75	95.55	79.78	73.64	74.11	75.88
37.8021	37.8021	96.23	80.45	73.57	74.15	75.92	94.47	78.69	68.92	69.45	70.64	95.55	79.77	73.44	74.03	75.76
37.895	37.895	96.23	80.44	72.84	74.01	75.77	94.47	78.68	68.62	69.37	70.54	95.55	79.76	72.71	73.89	75.61
37.9878	37.9878	96.23	80.43	73.98	74.08	75.71	94.47	78.67	69.66	69.46	70.53	95.55	79.76	73.85	73.96	75.55
38.0807	38.0807	96.23	80.43	74.04	74.07	75.63	94.47	78.67	69.7	69.48	70.48	95.56	79.75	73.93	73.95	75.47
38.1736	38.1736	96.24	80.42	73.75	74.02	75.53	94.47	78.66	69.36	69.45	70.41	95.56	79.74	73.63	73.91	75.37
38.2665	38.2665	96.24	80.41	73.37	73.95	75.41	94.47	78.65	68.97	69.38	70.32	95.56	79.73	73.25	73.83	75.26
38.3594	38.3594	96.24	80.4	73.16	73.88	75.3	94.48	78.64	68.81	69.33	70.24	95.56	79.72	73.03	73.76	75.15
38.4522	38.4522	96.24	80.39	72.63	73.74	75.16	94.48	78.63	68.51	69.24	70.14	95.56	79.71	72.5	73.62	75.01
38.5451	38.5451	96.24	80.38	72.82	73.68	75.06	94.48	78.62	68.64	69.2	70.07	95.57	79.71	72.7	73.56	74.9
38.638	38.638	96.24	80.37	73.31	73.69	74.99	94.48	78.61	69.12	69.23	70.04	95.57	79.7	73.19	73.57	74.84
38.7309	38.7309	96.25	80.37	73.21	73.64	74.9	94.48	78.6	69.09	69.21	69.98	95.57	79.69	73.09	73.52	74.75
38.8238	38.8238	96.25	80.36	73.05	73.58	74.8	94.48	78.59	68.85	69.17	69.91	95.57	79.68	72.93	73.46	74.65
38.9166	38.9166	96.25	80.35	72.57	73.47	74.68	94.48	78.58	68.49	69.09	69.83	95.57	79.67	72.44	73.35	74.53
39.0095	39.0095	96.25	80.34	73.58	73.55	74.66	94.48	78.57	69.22	69.15	69.82	95.58	79.67	73.46	73.43	74.51
39.1024	39.1024	96.26	80.33	73.94	73.61	74.63	94.48	78.56	69.21	69.15	69.79	95.58	79.66	73.82	73.49	74.48
39.1953	39.1953	96.26	80.32	73.23	73.52	74.53	94.49	78.55	68.68	69.08	69.71	95.58	79.65	73.11	73.4	74.38
39.2882	39.2882	96.26	80.32	74.04	73.63	74.6	94.49	78.54	69.47	69.17	69.99	95.59	79.64	73.93	73.51	74.49
39.381	39.381	96.26	80.31	73.92	73.65	74.56	94.49	78.54	69.24	69.16	69.94	95.59	79.64	73.8	73.53	74.45
39.4739	39.4739	96.26	80.3	73.9	73.67	74.53	94.49	78.53	69.07	69.14	69.89	95.59	79.63	73.77	73.55	74.41
39.5668	39.5668	96.27	80.29	74	73.72	74.5	94.49	78.52	69.3	69.18	69.87	95.59	79.62	73.89	73.6	74.39
39.6597	39.6597	96.27	80.29	74.85	73.87	75.15	94.49	78.51	69.98	69.29	70.27	95.6	79.61	74.74	73.75	75.04
39.7526	39.7526	96.27	80.28	74.46	73.9	75.1	94.49	78.5	69.87	69.34	70.25	95.6	79.61	74.35	73.78	74.99
39.8454	39.8454	96.28	80.27	74.32	73.92	75.05	94.49	78.49	69.59	69.34	70.2	95.6	79.6	74.2	73.81	74.94
39.9383	39.9383	96.28	80.26	74.78	74.07	75.32	94.5	78.48	69.71	69.4	70.18	95.61	79.59	74.67	73.95	75.21
40.0312	40.0312	96.28	80.26	74.13	74.02	75.23	94.5	78.47	69.4	69.38	70.13	95.61	79.59	74.01	73.9	75.12
40.1241	40.1241	96.28	80.25	74.1	74.03	75.17	94.5	78.46	69.46	69.39	70.1	95.61	79.58	73.98	73.91	75.06
40.217	40.217	96.29	80.24	74.38	74.06	75.13	94.5	78.46	69.42	69.38	70.05	95.61	79.57	74.27	73.95	75.02
40.3098	40.3098	96.29	80.23	73.52	73.95	75.02	94.5	78.45	68.91	69.3	69.97	95.62	79.56	73.39	73.83	74.9
40.4027	40.4027	96.29	80.23	74.12	74.01	74.99	94.5	78.44	69.39	69.35	69.96	95.62	79.56	73.99	73.9	74.88
40.4956	40.4956	96.29	80.22	74.07	74.03	74.95	94.5	78.43	69.38	69.36	69.93	95.62	79.55	73.95	73.92	74.84
40.5885	40.5885	96.29	80.21	73.59	73.96	74.86	94.5	78.42	69.18	69.33	69.88	95.63	79.54	73.47	73.84	74.75
40.6814	40.6814	96.3	80.2	73.24	73.88	74.77	94.51	78.41	68.89	69.27	69.81	95.63	79.53	73.12	73.76	74.65
40.7742	40.7742	96.3	80.19	73.73	73.91	74.73	94.51	78.4	69.2	69.29	69.79	95.63	79.53	73.6	73.79	74.62
40.8671	40.8671	96.3	80.19	73.79	73.9	74.68	94.51	78.39	69.32	69.3	69.77	95.63	79.52	73.67	73.78	74.57
40.96	40.96	96.3	80.18	73.19	73.82	74.59	94.51	78.39	69.07	69.28	69.73	95.63	79.51	73.07	73.7	74.48
41.0529	41.0529	96.31	80.17	73.55	73.82	74.55	94.51	78.38	69.2	69.28	69.71	95.64	79.5	73.43	73.7	74.44
41.1458	41.1458	96.31	80.16	73.92	73.84	74.52	94.51	78.37	69.49	69.31	69.7	95.64	79.5	73.8	73.72	74.41
41.2386	41.2386	96.31	80.16	74.34	73.92	74.7	94.51	78.36	69.57	69.34	69.7	95.64	79.49	74.22	73.8	74.59
41.3315	41.3315	96.31	80.15	74.44	73.97	74.68	94.51	78.35	69.6	69.36	69.69	95.65	79.48	74.33	73.85	74.58
41.4244	41.4244	96.31	80.14	73.81	73.91	74.61	94.52	78.34	69.01	69.29	69.63	95.65	79.48	73.69	73.79	74.5
41.5173	41.5173	96.32	80.13	72.95	73.77	74.49	94.52	78.33	68.66	69.22	69.56	95.65	79.47	72.83	73.66	74.38
41.6102	41.6102	96.32	80.13	73.51	73.78	74.46	94.52	78.33	68.9	69.21	69.54	95.65	79.46	73.38	73.66	74.35
41.703	41.703	96.32	80.12	74.57	73.96	75.45	94.52	78.32	69.62	69.32	70.08	95.66	79.45	74.45	73.84	75.32
41.7959	41.7959	96.32	80.11	74.24	73.98	75.38	94.52	78.31	69.44	69.33	70.04	95.66	79.45	74.12	73.86	75.26
41.8888	41.8888	96.33	80.11	74.67	74.05	75.35	94.52	78.3	69.73	69.38	70.03	95.66	79.44	74.56	73.94	75.22
41.9817	41.9817	96.33	80.1	75.54	74.3	76.23	94.52	78.29	70.34	69.53	70.85	95.67	79.44	75.42	74.18	76.11
42.0746	42.0746	96.33	80.09	75	74.32	76.15	94.52	78.28	69.98	69.54	70.79	95.67	79.43	74.88	74.2	76.03
42.1674	42.1674	96.34	80.09	74.75	74.34	76.06	94.53	78.28	69.96	69.58	70.74	95.67	79.42	74.63	74.22	75.94
42.2603	42.2603	96.34	80.08	74.58	74.36	75.99	94.53	78.27	69.82	69.6	70.69	95.68	79.42	74.47	74.24	75.87
42.3532	42.3532	96.34	80.07	73.84	74.26	75.86	94.53	78.26	69.13	69.5	70.58	95.68	79.41	73.72	74.14	75.74
42.4461	42.4461	96.34	80.06	72.94	74.11	75.71	94.53	78.25	68.61	69.41	70.47	95.68	79.4	72.82	73.99	75.59
42.539	42.539	96.34	80.06	73.16	74.04	75.59	94.53	78.24	68.87	69.38	70.4	95.68	79.39	73.04	73.92	75.48
42.6318	42.6318	96.35	80.05	73.35	74	75.5	94.53	78.23	68.79	69.33	70.31	95.68	79.39	73.23	73.88	75.38
42.7247	42.7247	96.35	80.04	74.88	74.19	75.8	94.53	78.23	69.76	69.43	70.39	95.69	79.38	74.77	74.08	75.68
42.8176	42.8176	96.35	80.04	74.83	74.25	75.75	94.53	78.22	69.71	69.45	70.35	95.69	79.38	74.72	74.14	75.63
42.9105	42.9105	96.36	80.03	74.88	74.29	75.69	94.54	78.21	69.72	69.46	70.31	95.69	79.37	74.76	74.18	75.57
43.0034	43.0034	96.36	80.02	74.43	74.26	75.6	94.54	78.2	69.62	69.46	70.26	95.7	79.36	74.32	74.14	75.48
43.0962	43.0962	96.36	80.02	74.76	74.37	75.59	94.54	78.19	69.88	69.55	70.36	95.7	79.36	74.64	74.26	75.47
43.1891	43.1891	96.36	80.01	74.58	74.39	75.53	94.54	78.19	69.94	69.6	70.35	95.7	79.35	74.47	74.27	75.41
43.282	43.282	96.37	80	73.64	74.25	75.4	94.54	78.18	69.14	69.49	70.25	95.71	79.34	73.52	74.14	75.28
43.3749	43.3749	96.37	80	73.44	74.17	75.3	94.54	78.17	69.13	69.46	70.19	95.71	79.34	73.32	74.06	75.18
43.4678	43.4678	96.37	79.99	74.17	74.25	75.28	94.54	78.16	69.58	69.53	70.18	95.71	79.33	74.05	74.13	75.16
43.5606	43.5606	96.37	79.98	74.18	74.25	75.22	94.54	78.15	69.42	69.51	70.14	95.71	79.32	74.07	74.13	75.1
43.6535	43.6535	96.37	79.97	73.28	74.09	75.09	94.55	78.15	68.86	69.4	70.04	95.72	79.32	73.16	73.98	74.97
43.7464	43.7464	96.38	79.97	73.62	74.1	75.04	94.55	78.14	69.12	69.41	70.01	95.72	79.31	73.5	73.98	74.92
43.8393	43.8393	96.38	79.96	73.89	74.08	74.97	94.55	78.13	69.18	69.39	69.96	95.72	79.3	73.77	73.96	74.86
43.9322	43.9322	96.38	79.95	73.59	74.01	74.89	94.55	78.12	69.07	69.34	69.9	95.72	79.3	73.47	73.89	74.77
44.025	44.025	96.38	79.95	73.61	73.99	74.82	94.55	78.11	69.18	69.34	69.87	95.73	79.29	73.49	73.87	74.71
44.1179	44.1179	96.39	79.94	73.74	73.98	74.78	94.55	78.11	69.28	69.35	69.85	95.73	79.28	73.62	73.86	74.66
44.2108	44.2108	96.39	79.93	74.14	74.01	74.75	94.55	78.1	69.32	69.35	69.81	95.73	79.28	74.03	73.89	74.63
44.3037	44.3037	96.39	79.93	74.37	74.05	74.73	94.55	78.09	69.7	69.4	69.88	95.73	79.27	74.25	73.94	74.61
44.3966	44.3966	96.39	79.92	74.37	74.09	74.72	94.56	78.08	69.66	69.43	69.87	95.74	79.26	74.25	73.97	74.6
44.4894	44.4894	96.4	79.91	74.63	74.16	74.77	94.56	78.07	69.68	69.44	69.86	95.74	79.26	74.52	74.04	74.67
44.5823	44.5823	96.4	79.91	73.62	74.03	74.66	94.56	78.07	69.17	69.38	69.8	95.74	79.25	73.5	73.91	74.55
44.6752	44.6752	96.4	79.9	73.7	74	74.61	94.56	78.06	69.14	69.35	69.76	95.74	79.24	73.58	73.88	74.5
44.7681	44.7681	96.4	79.89	73.69	73.96	74.55	94.56	78.05	69	69.3	69.7	95.75	79.24	73.57	73.84	74.44
44.861	44.861	96.4	79.89	74.07	74	74.54	94.56	78.04	69.33	69.33	69.7	95.75	79.23	73.95	73.88	74.43
44.9538	44.9538	96.41	79.88	73.52	73.92	74.46	94.56	78.03	69.17	69.31	69.66	95.75	79.22	73.4	73.8	74.35
45.0467	45.0467	96.41	79.87	73.2	73.84	74.38	94.56	78.03	68.92	69.26	69.61	95.75	79.22	73.07	73.72	74.27
45.1396	45.1396	96.41	79.87	73.89	73.88	74.38	94.56	78.02	69.24	69.28	69.6	95.76	79.21	73.75	73.76	74.26
45.2325	45.2325	96.41	79.86	74.11	73.93	74.4	94.57	78.01	69.47	69.32	69.77	95.76	79.21	73.99	73.81	74.3
45.3254	45.3254	96.42	79.85	73.89	73.91	74.37	94.57	78	69.44	69.34	69.75	95.76	79.2	73.78	73.8	74.27
45.4182	45.4182	96.42	79.85	74.05	73.93	74.35	94.57	78	69.42	69.34	69.73	95.76	79.19	73.93	73.81	74.25
45.5111	45.5111	96.42	79.84	74.1	73.96	74.35	94.57	77.99	69.34	69.34	69.71	95.77	79.19	73.98	73.84	74.24
45.604	45.604	96.42	79.83	73.82	73.94	74.31	94.57	77.98	69.29	69.34	69.69	95.77	79.18	73.7	73.82	74.21
45.6969	45.6969	96.43	79.83	74.25	74	74.62	94.57	77.97	69.5	69.37	69.71	95.77	79.17	74.14	73.88	74.5
45.7898	45.7898	96.43	79.82	74.2	74.01	74.59	94.57	77.97	69.49	69.38	69.7	95.78	79.17	74.08	73.9	74.47
45.8826	45.8826	96.43	79.81	74.06	73.98	74.54	94.57	77.96	69.4	69.36	69.66	95.78	79.16	73.94	73.86	74.42
45.9755	45.9755	96.43	79.81	74.77	74.12	75.37	94.58	77.95	69.8	69.43	70.16	95.78	79.16	74.65	74	75.25
46.0684	46.0684	96.44	79.8	74.52	74.14	75.32	94.58	77.94	69.67	69.45	70.13	95.78	79.15	74.4	74.03	75.2
46.1613	46.1613	96.44	79.79	74.08	74.09	75.22	94.58	77.94	69.34	69.4	70.06	95.79	79.14	73.96	73.97	75.1
46.2542	46.2542	96.44	79.79	73.89	74.05	75.15	94.58	77.93	69.12	69.36	70	95.79	79.14	73.76	73.93	75.02
46.347	46.347	96.44	79.78	74.42	74.1	75.11	94.58	77.92	69.42	69.37	69.97	95.79	79.13	74.31	73.98	74.99
46.4399	46.4399	96.44	79.78	74.14	74.07	75.04	94.58	77.91	69.11	69.32	69.91	95.79	79.13	74.01	73.95	74.92
46.5328	46.5328	96.45	79.77	74.46	74.16	75.04	94.58	77.91	69.39	69.36	69.9	95.8	79.12	74.34	74.04	74.92
46.6257	46.6257	96.45	79.76	75.22	74.31	75.65	94.58	77.9	70.02	69.47	70.47	95.8	79.12	75.11	74.2	75.56
46.7185	46.7185	96.45	79.76	75.62	74.49	76.01	94.59	77.89	70.34	69.58	70.61	95.81	79.11	75.51	74.38	75.9
46.8114	46.8114	96.46	79.75	74.89	74.47	75.92	94.59	77.88	69.79	69.56	70.54	95.81	79.11	74.77	74.35	75.81
46.9043	46.9043	96.46	79.75	74.16	74.37	75.8	94.59	77.88	69.32	69.5	70.45	95.81	79.1	74.04	74.25	75.68
46.9972	46.9972	96.46	79.74	73.46	74.25	75.67	94.59	77.87	68.93	69.42	70.36	95.81	79.09	73.34	74.13	75.55
47.0901	47.0901	96.46	79.73	73.64	74.21	75.57	94.59	77.86	69.16	69.41	70.3	95.82	79.09	73.52	74.09	75.46
47.1829	47.1829	96.46	79.73	73.82	74.2	75.5	94.59	77.85	69.24	69.41	70.25	95.82	79.08	73.71	74.08	75.38
47.2758	47.2758	96.47	79.72	74.56	74.29	75.47	94.59	77.85	69.66	69.47	70.24	95.82	79.07	74.45	74.17	75.36
47.3687	47.3687	96.47	79.72	74.38	74.29	75.41	94.59	77.84	69.61	69.49	70.21	95.82	79.07	74.26	74.17	75.3
47.4616	47.4616	96.47	79.71	74.06	74.22	75.32	94.6	77.83	69.59	69.48	70.16	95.83	79.06	73.94	74.11	75.2
47.5545	47.5545	96.47	79.7	73.59	74.13	75.21	94.6	77.83	69.17	69.41	70.08	95.83	79.06	73.47	74.02	75.1
47.6473	47.6473	96.48	79.7	73.47	74.08	75.13	94.6	77.82	68.91	69.35	70.01	95.83	79.05	73.34	73.96	75.01
47.7402	47.7402	96.48	79.69	74.92	74.26	75.81	94.6	77.81	69.87	69.47	70.54	95.83	79.05	74.81	74.15	75.71
47.8331	47.8331	96.48	79.68	74.71	74.31	75.76	94.6	77.8	69.76	69.5	70.49	95.84	79.04	74.59	74.19	75.65
47.926	47.926	96.48	79.68	74.35	74.3	75.68	94.6	77.8	69.6	69.52	70.45	95.84	79.03	74.23	74.19	75.58
48.0189	48.0189	96.49	79.67	73.62	74.21	75.56	94.6	77.79	69.03	69.44	70.36	95.84	79.03	73.5	74.09	75.46
48.1117	48.1117	96.49	79.67	73.53	74.15	75.46	94.6	77.78	69.09	69.43	70.3	95.84	79.02	73.41	74.04	75.36
48.2046	48.2046	96.49	79.66	74.11	74.18	75.41	94.61	77.78	69.38	69.44	70.26	95.85	79.02	74	74.06	75.3
48.2975	48.2975	96.49	79.65	73.41	74.08	75.29	94.61	77.77	68.76	69.35	70.16	95.85	79.01	73.29	73.96	75.19
48.3904	48.3904	96.49	79.65	73.97	74.09	75.23	94.61	77.76	69.05	69.32	70.1	95.85	79	73.85	73.97	75.12
48.4833	48.4833	96.5	79.64	73.79	74.06	75.16	94.61	77.75	69.05	69.3	70.05	95.85	79	73.68	73.94	75.05
48.5761	48.5761	96.5	79.64	73.99	74.07	75.1	94.61	77.75	69.51	69.36	70.04	95.86	78.99	73.87	73.95	75
48.669	48.669	96.5	79.63	74.15	74.08	75.06	94.61	77.74	69.37	69.34	69.99	95.86	78.99	74.03	73.97	74.95
48.7619	48.7619	96.5	79.62	74.34	74.14	75.03	94.61	77.73	69.66	69.39	69.99	95.86	78.98	74.19	74.02	74.92
48.8548	48.8548	96.51	79.62	75.97	74.54	76.85	94.62	77.73	71.57	69.87	73.09	95.87	78.98	75.76	74.4	76.6
48.9477	48.9477	96.51	79.62	75.47	74.62	76.78	94.62	77.72	71.12	70	72.99	95.87	78.97	75.21	74.46	76.52
49.0405	49.0405	96.52	79.61	75.02	74.63	76.68	94.62	77.71	70.27	69.95	72.85	95.87	78.97	74.82	74.47	76.42
49.1334	49.1334	96.52	79.6	74.03	74.49	76.52	94.62	77.71	69.79	69.89	72.69	95.88	78.96	73.77	74.32	76.26
49.2263	49.2263	96.52	79.6	75.26	74.63	76.48	94.62	77.7	71.61	70.17	72.67	95.88	78.96	74.69	74.4	76.2
49.3192	49.3192	96.52	79.59	75	74.64	76.39	94.62	77.69	70.71	70.14	72.54	95.88	78.95	74.64	74.42	76.12
49.4121	49.4121	96.53	79.59	74.37	74.56	76.27	94.62	77.69	70.07	70.08	72.41	95.89	78.95	74.1	74.35	76
49.5049	49.5049	96.53	79.58	73.78	74.47	76.14	94.63	77.68	69.53	70	72.27	95.89	78.94	73.58	74.26	75.88
49.5978	49.5978	96.53	79.57	73.65	74.38	76.02	94.63	77.67	69.16	69.91	72.12	95.89	78.93	73.49	74.18	75.76
49.6907	49.6907	96.53	79.57	73.3	74.28	75.89	94.63	77.67	68.86	69.81	71.97	95.89	78.93	73.16	74.08	75.63
49.7836	49.7836	96.53	79.56	73.29	74.2	75.77	94.63	77.66	68.93	69.75	71.84	95.89	78.92	73.16	74.01	75.52
49.8765	49.8765	96.54	79.56	74.68	74.33	75.75	94.63	77.65	69.71	69.78	71.76	95.9	78.92	74.56	74.14	75.5
49.9693	49.9693	96.54	79.55	74.14	74.28	75.65	94.63	77.64	69.47	69.74	71.65	95.9	78.91	74.03	74.1	75.41
50.0622	50.0622	96.54	79.55	74.02	74.23	75.55	94.63	77.64	69.3	69.68	71.52	95.9	78.91	73.91	74.06	75.32
50.1551	50.1551	96.54	79.54	73.99	74.21	75.47	94.63	77.63	69.28	69.65	71.42	95.9	78.9	73.87	74.04	75.25
50.248	50.248	96.55	79.53	74.38	74.25	75.43	94.64	77.62	69.56	69.66	71.34	95.91	78.9	74.26	74.09	75.21
50.3409	50.3409	96.55	79.53	73.54	74.13	75.3	94.64	77.62	68.84	69.54	71.2	95.91	78.89	73.41	73.97	75.08
50.4337	50.4337	96.55	79.52	73.44	74.05	75.2	94.64	77.61	69.1	69.51	71.1	95.91	78.88	73.32	73.9	74.99
50.5266	50.5266	96.55	79.52	74.17	74.1	75.16	94.64	77.6	69.52	69.52	71.02	95.91	78.88	74.05	73.94	74.95
50.6195	50.6195	96.55	79.51	74.74	74.22	75.31	94.64	77.6	69.96	69.61	70.99	95.92	78.87	74.63	74.07	75.2
50.7124	50.7124	96.56	79.5	73.95	74.14	75.21	94.64	77.59	69.42	69.56	70.89	95.92	78.87	73.83	73.99	75.1
50.8053	50.8053	96.56	79.5	73.48	74.06	75.11	94.64	77.58	69.24	69.53	70.81	95.92	78.86	73.36	73.91	75
50.8981	50.8981	96.56	79.49	74.04	74.08	75.06	94.64	77.58	69.55	69.55	70.75	95.92	78.86	73.93	73.94	74.95
50.991	50.991	96.56	79.49	74.53	74.16	75.05	94.65	77.57	69.52	69.54	70.68	95.93	78.85	74.42	74.02	74.94
51.0839	51.0839	96.56	79.48	74.12	74.11	74.98	94.65	77.56	69.31	69.5	70.6	95.93	78.85	74.01	73.98	74.87
51.1768	51.1768	96.57	79.48	73.71	74.04	74.89	94.65	77.56	69.04	69.44	70.51	95.93	78.84	73.58	73.9	74.77
51.2697	51.2697	96.57	79.47	74.28	74.1	74.88	94.65	77.55	69.32	69.45	70.46	95.94	78.84	74.16	73.97	74.77
51.3625	51.3625	96.57	79.47	74.01	74.07	74.82	94.65	77.54	69.35	69.43	70.39	95.94	78.83	73.9	73.93	74.7
51.4554	51.4554	96.57	79.46	73.7	74.02	74.75	94.65	77.54	69.31	69.42	70.34	95.94	78.83	73.58	73.89	74.64
51.5483	51.5483	96.58	79.45	74.22	74.07	74.74	94.65	77.53	69.81	69.49	70.32	95.94	78.82	74.11	73.94	74.62
51.6412	51.6412	96.58	79.45	73.79	74.02	74.67	94.65	77.52	69.49	69.48	70.27	95.94	78.81	73.67	73.89	74.56
51.7341	51.7341	96.58	79.44	73.61	73.97	74.6	94.65	77.52	69.11	69.42	70.19	95.95	78.81	73.49	73.84	74.49
51.8269	51.8269	96.58	79.44	73.09	73.88	74.51	94.66	77.51	68.65	69.33	70.1	95.95	78.8	72.96	73.75	74.4
51.9198	51.9198	96.58	79.43	73.88	73.92	74.51	94.66	77.5	69.26	69.37	70.08	95.95	78.8	73.76	73.8	74.39
52.0127	52.0127	96.59	79.43	74.59	74.04	75.12	94.66	77.5	69.71	69.43	70.08	95.95	78.79	74.48	73.92	75.01
52.1056	52.1056	96.59	79.42	73.83	73.96	75.02	94.66	77.49	69.26	69.38	70.01	95.96	78.79	73.71	73.83	74.91
52.1985	52.1985	96.59	79.41	73.98	73.97	74.97	94.66	77.48	69.43	69.39	69.98	95.96	78.78	73.86	73.84	74.86
52.2913	52.2913	96.59	79.41	73.25	73.85	74.85	94.66	77.48	69.09	69.33	69.91	95.96	78.78	73.13	73.72	74.74
52.3842	52.3842	96.59	79.4	73.71	73.87	74.81	94.66	77.47	69.32	69.35	69.89	95.96	78.77	73.59	73.75	74.69
52.4771	52.4771	96.6	79.4	73.65	73.85	74.74	94.66	77.46	69.09	69.31	69.83	95.97	78.77	73.53	73.72	74.63
52.57	52.57	96.6	79.39	73.39	73.79	74.66	94.66	77.46	69.05	69.28	69.79	95.97	78.76	73.27	73.66	74.55
52.6629	52.6629	96.6	79.39	73.91	73.85	74.65	94.67	77.45	69.3	69.31	69.78	95.97	78.76	73.8	73.72	74.53
52.7557	52.7557	96.6	79.38	73.84	73.85	74.6	94.67	77.44	69.56	69.35	69.83	95.97	78.75	73.72	73.72	74.49
52.8486	52.8486	96.61	79.37	73.72	73.82	74.55	94.67	77.44	69.28	69.32	69.78	95.98	78.74	73.6	73.7	74.43
52.9415	52.9415	96.61	79.37	74.26	73.93	74.88	94.67	77.43	69.59	69.39	70.02	95.98	78.74	74.14	73.81	74.68
53.0344	53.0344	96.61	79.37	74.82	74.06	75.21	94.67	77.43	69.9	69.45	70.08	95.98	78.74	74.71	73.94	75.11
53.1273	53.1273	96.61	79.36	74.33	74.04	75.14	94.67	77.42	69.51	69.42	70.03	95.98	78.73	74.21	73.92	75.04
53.2201	53.2201	96.61	79.35	73.84	73.98	75.05	94.67	77.41	69.21	69.38	69.97	95.99	78.73	73.73	73.86	74.95
53.313	53.313	96.62	79.35	73.86	73.98	74.99	94.67	77.41	69.23	69.38	69.93	95.99	78.72	73.74	73.86	74.89
53.4059	53.4059	96.62	79.34	74.3	74.03	74.97	94.68	77.4	69.76	69.44	70.07	95.99	78.72	74.18	73.91	74.86
53.4988	53.4988	96.62	79.34	73.97	73.98	74.89	94.68	77.39	69.3	69.38	70	95.99	78.71	73.85	73.86	74.78
53.5917	53.5917	96.62	79.33	73.91	73.98	74.84	94.68	77.39	69.24	69.37	69.96	96	78.71	73.79	73.86	74.73
53.6845	53.6845	96.63	79.33	74.36	74.05	74.83	94.68	77.38	69.33	69.37	69.92	96	78.7	74.24	73.93	74.72
53.7774	53.7774	96.63	79.32	73.56	73.96	74.74	94.68	77.37	68.96	69.32	69.87	96	78.69	73.44	73.84	74.63
53.8703	53.8703	96.63	79.32	73.61	73.91	74.67	94.68	77.37	69.18	69.31	69.82	96	78.69	73.49	73.79	74.56
53.9632	53.9632	96.63	79.31	74.76	74.05	75.29	94.68	77.36	70.16	69.44	70.63	96.01	78.69	74.63	73.93	75.15
54.0561	54.0561	96.64	79.31	75.88	74.38	76.85	94.69	77.36	71.27	69.78	72.1	96.01	78.68	75.73	74.26	76.39
54.1489	54.1489	96.64	79.3	74.8	74.34	76.72	94.69	77.35	70.57	69.81	72	96.01	78.68	74.62	74.2	76.26
54.2418	54.2418	96.64	79.3	74.3	74.28	76.58	94.69	77.34	69.94	69.76	71.88	96.02	78.67	74.15	74.15	76.14
54.3347	54.3347	96.64	79.29	74.75	74.35	76.5	94.69	77.34	70.81	69.93	71.85	96.02	78.67	74.48	74.19	76.06
54.4276	54.4276	96.65	79.29	75.21	74.49	76.46	94.69	77.33	70.99	70.06	71.81	96.02	78.66	74.93	74.32	76.02
54.5205	54.5205	96.65	79.28	74.32	74.4	76.32	94.69	77.33	70.14	69.99	71.69	96.02	78.66	74.1	74.23	75.9
54.6133	54.6133	96.65	79.28	74.06	74.35	76.21	94.69	77.32	69.72	69.93	71.58	96.03	78.65	73.89	74.19	75.8
54.7062	54.7062	96.65	79.27	73.8	74.28	76.08	94.7	77.31	69.44	69.87	71.46	96.03	78.65	73.66	74.12	75.68
54.7991	54.7991	96.66	79.27	74.67	74.37	76.03	94.7	77.31	69.81	69.88	71.39	96.03	78.64	74.55	74.21	75.64
54.892	54.892	96.66	79.26	74.29	74.33	75.93	94.7	77.3	69.5	69.83	71.29	96.03	78.64	74.17	74.18	75.56
54.9849	54.9849	96.66	79.26	74.13	74.31	75.84	94.7	77.3	69.52	69.8	71.2	96.04	78.63	74	74.16	75.47
55.0777	55.0777	96.66	79.25	74.41	74.35	75.78	94.7	77.29	69.86	69.84	71.15	96.04	78.63	74.29	74.2	75.43
55.1706	55.1706	96.67	79.25	74.18	74.32	75.69	94.7	77.28	69.47	69.78	71.05	96.04	78.63	74.06	74.17	75.35
55.2635	55.2635	96.67	79.24	73.97	74.28	75.61	94.7	77.28	69.44	69.76	70.97	96.04	78.62	73.86	74.14	75.27
55.3564	55.3564	96.67	79.24	74.2	74.29	75.54	94.7	77.27	69.68	69.76	70.91	96.05	78.62	74.08	74.15	75.22
55.4493	55.4493	96.67	79.23	74.57	74.35	75.5	94.71	77.27	69.95	69.8	70.87	96.05	78.61	74.45	74.21	75.19
55.5421	55.5421	96.67	79.23	74.23	74.33	75.43	94.71	77.26	69.6	69.77	70.79	96.05	78.61	74.11	74.19	75.13
55.635	55.635	96.68	79.22	74.3	74.34	75.38	94.71	77.25	69.73	69.78	70.75	96.06	78.6	74.19	74.21	75.09
55.7279	55.7279	96.68	79.22	74.9	74.43	75.37	94.71	77.25	70.07	69.82	70.72	96.06	78.6	74.79	74.3	75.11
55.8208	55.8208	96.68	79.21	74.56	74.42	75.31	94.71	77.24	69.58	69.77	70.64	96.06	78.59	74.45	74.29	75.06
55.9137	55.9137	96.68	79.21	74.24	74.37	75.24	94.71	77.24	69.5	69.74	70.57	96.06	78.59	74.12	74.24	74.99
56.0065	56.0065	96.69	79.2	74.37	74.36	75.18	94.71	77.23	69.64	69.72	70.52	96.07	78.58	74.25	74.23	74.94
56.0994	56.0994	96.69	79.2	74.38	74.36	75.14	94.71	77.22	69.6	69.71	70.47	96.07	78.58	74.26	74.23	74.9
56.1923	56.1923	96.69	79.19	74.33	74.37	75.1	94.72	77.22	69.52	69.69	70.42	96.07	78.57	74.21	74.24	74.87
56.2852	56.2852	96.69	79.19	74.54	74.41	75.08	94.72	77.21	69.84	69.73	70.4	96.07	78.57	74.43	74.28	74.86
56.3781	56.3781	96.7	79.18	74.11	74.34	75	94.72	77.21	69.6	69.7	70.34	96.08	78.57	73.99	74.21	74.79
56.4709	56.4709	96.7	79.18	73.49	74.22	74.9	94.72	77.2	69.18	69.62	70.26	96.08	78.56	73.37	74.09	74.68
56.5638	56.5638	96.7	79.18	74.51	74.32	75.29	94.72	77.19	69.61	69.65	70.24	96.08	78.56	74.39	74.2	75.18
56.6567	56.6567	96.7	79.17	74.26	74.32	75.24	94.72	77.19	69.57	69.66	70.21	96.08	78.55	74.14	74.19	75.12
56.7496	56.7496	96.71	79.17	74.21	74.31	75.19	94.72	77.18	69.62	69.66	70.18	96.09	78.55	74.1	74.19	75.07
56.8424	56.8424	96.71	79.16	74.06	74.27	75.11	94.72	77.18	69.48	69.63	70.13	96.09	78.54	73.94	74.15	75
56.9353	56.9353	96.71	79.16	73.86	74.22	75.04	94.72	77.17	69.27	69.58	70.08	96.09	78.54	73.74	74.1	74.92
57.0282	57.0282	96.71	79.15	73.51	74.14	74.95	94.73	77.17	68.98	69.51	70	96.09	78.53	73.39	74.02	74.83
57.1211	57.1211	96.71	79.15	74.05	74.18	74.93	94.73	77.16	69.49	69.55	70	96.1	78.53	73.94	74.06	74.81
57.214	57.214	96.72	79.14	75.68	74.44	76.47	94.73	77.15	71.09	69.81	71.86	96.1	78.53	75.52	74.32	76.3
57.3068	57.3068	96.72	79.14	76.09	74.68	76.57	94.73	77.15	71.84	70.14	72.56	96.1	78.52	75.91	74.54	76.38
57.3997	57.3997	96.72	79.13	75.79	74.74	76.51	94.73	77.14	71.08	70.14	72.44	96.11	78.52	75.64	74.61	76.32
57.4926	57.4926	96.73	79.13	75.12	74.7	76.4	94.73	77.14	70.76	70.15	72.34	96.11	78.51	74.93	74.56	76.21
57.5855	57.5855	96.73	79.13	74.74	74.67	76.3	94.74	77.13	70.6	70.19	72.25	96.11	78.51	74.46	74.51	76.1
57.6784	57.6784	96.73	79.12	74.59	74.63	76.2	94.74	77.13	71.13	70.29	72.2	96.12	78.51	73.99	74.42	75.98
57.7712	57.7712	96.73	79.12	75.4	74.78	76.19	94.74	77.12	70.84	70.32	72.12	96.12	78.5	75.07	74.57	75.97
57.8641	57.8641	96.74	79.11	75.56	74.86	76.16	94.74	77.12	70.67	70.34	72.03	96.12	78.5	75.34	74.66	75.95
57.957	57.957	96.74	79.11	74.03	74.69	76	94.74	77.11	69.39	70.17	71.87	96.12	78.49	73.85	74.49	75.8
58.0499	58.0499	96.74	79.1	73.87	74.61	75.9	94.74	77.11	69.32	70.1	71.76	96.13	78.49	73.72	74.42	75.69
58.1428	58.1428	96.74	79.1	73.63	74.51	75.78	94.74	77.1	69.31	70.03	71.64	96.13	78.48	73.5	74.32	75.57
58.2356	58.2356	96.74	79.09	73.53	74.42	75.66	94.75	77.09	69.18	69.95	71.52	96.13	78.48	73.41	74.24	75.47
58.3285	58.3285	96.75	79.09	74.53	74.5	75.64	94.75	77.09	69.89	70	71.46	96.13	78.48	74.41	74.33	75.45
58.4214	58.4214	96.75	79.08	73.86	74.39	75.52	94.75	77.08	69.35	69.9	71.34	96.14	78.47	73.73	74.22	75.33
58.5143	58.5143	96.75	79.08	74.31	74.44	75.49	94.75	77.08	69.54	69.9	71.26	96.14	78.47	74.19	74.27	75.3
58.6072	58.6072	96.75	79.07	73.82	74.34	75.38	94.75	77.07	69.13	69.8	71.14	96.14	78.46	73.7	74.18	75.2
58.7	58.7	96.76	79.07	74.84	74.46	75.5	94.75	77.07	69.69	69.83	71.09	96.14	78.46	74.73	74.3	75.39
58.7929	58.7929	96.76	79.07	75.47	74.63	76.07	94.75	77.06	69.99	69.87	71.04	96.15	78.45	75.36	74.48	75.96
58.8858	58.8858	96.76	79.06	75.2	74.66	76.01	94.75	77.05	70.04	69.9	71	96.15	78.45	75.09	74.52	75.9
58.9787	58.9787	96.76	79.06	74.71	74.61	75.92	94.76	77.05	69.86	69.88	70.93	96.15	78.45	74.6	74.47	75.8
59.0716	59.0716	96.77	79.05	73.85	74.49	75.79	94.76	77.04	69.29	69.79	70.82	96.16	78.44	73.74	74.35	75.67
59.1644	59.1644	96.77	79.05	74.19	74.48	75.72	94.76	77.04	69.63	69.8	70.77	96.16	78.44	74.08	74.34	75.6
59.2573	59.2573	96.77	79.04	74.49	74.52	75.67	94.76	77.03	69.77	69.81	70.73	96.16	78.43	74.38	74.38	75.56
59.3502	59.3502	96.77	79.04	74.02	74.44	75.57	94.76	77.03	69.44	69.76	70.65	96.16	78.43	73.91	74.3	75.45
59.4431	59.4431	96.78	79.03	74.14	74.42	75.5	94.76	77.02	69.55	69.75	70.59	96.17	78.42	74.02	74.29	75.38
59.536	59.536	96.78	79.03	74.78	74.5	75.48	94.76	77.02	69.8	69.77	70.56	96.17	78.42	74.67	74.37	75.37
59.6288	59.6288	96.78	79.03	74.31	74.45	75.4	94.76	77.01	69.4	69.71	70.48	96.17	78.42	74.19	74.32	75.29
59.7217	59.7217	96.78	79.02	73.6	74.32	75.28	94.76	77	68.97	69.62	70.38	96.17	78.41	73.48	74.19	75.17
59.8146	59.8146	96.79	79.02	74.6	74.41	75.28	94.77	77	69.64	69.67	70.37	96.18	78.41	74.49	74.28	75.16
59.9075	59.9075	96.79	79.01	74.26	74.36	75.2	94.77	76.99	69.46	69.63	70.31	96.18	78.4	74.14	74.23	75.09
60.0004	60.0004	96.79	79.01	74.7	74.42	75.19	94.77	76.99	69.79	69.66	70.29	96.18	78.4	74.59	74.3	75.08
60.0932	60.0932	96.79	79	74.03	74.33	75.1	94.77	76.98	69.51	69.62	70.23	96.18	78.4	73.91	74.21	74.98
60.1861	60.1861	96.79	79	73.14	74.18	74.97	94.77	76.98	68.94	69.52	70.14	96.18	78.39	73.02	74.05	74.85
60.279	60.279	96.79	78.99	73.12	74.08	74.87	94.77	76.97	68.91	69.46	70.07	96.19	78.38	73	73.95	74.75
60.3719	60.3719	96.8	78.99	73.39	74.04	74.8	94.77	76.96	69.08	69.44	70.02	96.19	78.38	73.27	73.91	74.68
60.4648	60.4648	96.8	78.98	73.47	74	74.74	94.77	76.96	69.01	69.4	69.97	96.19	78.38	73.35	73.88	74.62
60.5576	60.5576	96.8	78.98	72.95	73.89	74.63	94.78	76.95	68.7	69.33	69.89	96.19	78.37	72.83	73.77	74.52
60.6505	60.6505	96.8	78.97	73.08	73.82	74.55	94.78	76.95	68.65	69.27	69.82	96.19	78.37	72.95	73.69	74.43
60.7434	60.7434	96.8	78.97	72.45	73.67	74.43	94.78	76.94	68.19	69.15	69.72	96.2	78.36	72.32	73.55	74.31
60.8363	60.8363	96.81	78.96	73.54	73.72	74.41	94.78	76.94	68.9	69.17	69.7	96.2	78.36	73.41	73.6	74.29
60.9292	60.9292	96.81	78.96	73.56	73.71	74.37	94.78	76.93	68.95	69.16	69.66	96.2	78.35	73.43	73.59	74.25
61.022	61.022	96.81	78.95	74.04	73.8	74.61	94.78	76.93	69.13	69.18	69.65	96.2	78.35	73.92	73.67	74.48
61.1149	61.1149	96.81	78.95	73.8	73.78	74.56	94.78	76.92	69.13	69.18	69.62	96.21	78.34	73.68	73.66	74.43
61.2078	61.2078	96.81	78.95	73.88	73.8	74.53	94.78	76.91	69.11	69.17	69.59	96.21	78.34	73.77	73.68	74.4
61.3007	61.3007	96.82	78.94	74.38	73.89	74.76	94.78	76.91	69.47	69.23	69.84	96.21	78.34	74.26	73.77	74.63
61.3936	61.3936	96.82	78.94	74.09	73.9	74.72	94.78	76.9	69.29	69.24	69.81	96.21	78.33	73.97	73.78	74.59
61.4864	61.4864	96.82	78.93	73.72	73.85	74.64	94.79	76.9	69.26	69.23	69.77	96.21	78.33	73.6	73.73	74.52
61.5793	61.5793	96.82	78.93	74.67	73.99	75.23	94.79	76.89	69.78	69.32	70.14	96.22	78.32	74.55	73.87	75.11
61.6722	61.6722	96.82	78.92	74.36	74.01	75.18	94.79	76.89	69.56	69.33	70.1	96.22	78.32	74.24	73.89	75.06
61.7651	61.7651	96.83	78.92	74.71	74.12	75.17	94.79	76.88	69.77	69.39	70.09	96.22	78.32	74.6	74	75.05
61.858	61.858	96.83	78.92	73.85	74.02	75.07	94.79	76.88	69.2	69.32	70.01	96.23	78.31	73.73	73.9	74.94
61.9508	61.9508	96.83	78.91	74.09	74.03	75.01	94.79	76.87	69.39	69.33	69.98	96.23	78.31	73.98	73.91	74.89
62.0437	62.0437	96.83	78.91	74.79	74.18	75.53	94.79	76.87	69.72	69.4	70.08	96.23	78.3	74.68	74.06	75.41
62.1366	62.1366	96.84	78.9	74.28	74.16	75.44	94.79	76.86	69.62	69.42	70.05	96.23	78.3	74.16	74.04	75.33
62.2295	62.2295	96.84	78.9	73.55	74.05	75.32	94.8	76.86	69.1	69.35	69.98	96.24	78.3	73.43	73.93	75.21
62.3224	62.3224	96.84	78.89	74.23	74.11	75.29	94.8	76.85	69.48	69.39	69.97	96.24	78.29	74.11	73.99	75.17
62.4152	62.4152	96.84	78.89	74.06	74.09	75.21	94.8	76.84	69.34	69.37	69.92	96.24	78.29	73.94	73.97	75.1
62.5081	62.5081	96.85	78.89	74.52	74.19	75.21	94.8	76.84	69.49	69.4	69.91	96.24	78.28	74.4	74.07	75.09
62.601	62.601	96.85	78.88	73.54	74.05	75.08	94.8	76.83	68.84	69.3	69.82	96.24	78.28	73.41	73.93	74.96
62.6939	62.6939	96.85	78.88	73.68	74.05	75.02	94.8	76.83	68.96	69.29	69.79	96.25	78.28	73.56	73.93	74.91
62.7868	62.7868	96.85	78.87	73.18	73.94	74.91	94.8	76.82	68.82	69.24	69.73	96.25	78.27	73.06	73.82	74.79
62.8796	62.8796	96.85	78.87	73.63	73.95	74.86	94.8	76.82	69.34	69.29	69.85	96.25	78.27	73.5	73.83	74.75
62.9725	62.9725	96.86	78.86	74.51	74.06	75.07	94.8	76.81	69.83	69.37	70.14	96.25	78.26	74.4	73.94	74.98
63.0654	63.0654	96.86	78.86	74.75	74.15	75.07	94.81	76.81	69.88	69.42	70.13	96.26	78.26	74.64	74.03	74.97
63.1583	63.1583	96.86	78.85	73.59	74.02	74.95	94.81	76.8	69.09	69.34	70.04	96.26	78.25	73.47	73.9	74.85
63.2512	63.2512	96.86	78.85	74.45	74.09	74.94	94.81	76.8	69.55	69.37	70.02	96.26	78.25	74.33	73.97	74.83
63.344	63.344	96.86	78.85	74.13	74.05	74.86	94.81	76.79	69.36	69.33	69.96	96.26	78.25	74.01	73.93	74.76
63.4369	63.4369	96.87	78.84	74.24	74.07	74.83	94.81	76.79	69.48	69.35	69.93	96.27	78.24	74.12	73.95	74.73
63.5298	63.5298	96.87	78.84	74.22	74.06	74.78	94.81	76.78	69.53	69.35	69.9	96.27	78.24	74.1	73.95	74.68
63.6227	63.6227	96.87	78.83	73.83	74.02	74.72	94.81	76.78	69.17	69.31	69.85	96.27	78.23	73.72	73.9	74.62
63.7156	63.7156	96.87	78.83	73.83	73.99	74.66	94.81	76.77	69.27	69.31	69.81	96.27	78.23	73.71	73.87	74.56
63.8084	63.8084	96.87	78.82	73.87	73.98	74.62	94.81	76.77	69.35	69.31	69.79	96.27	78.23	73.75	73.86	74.52
63.9013	63.9013	96.88	78.82	73.5	73.9	74.54	94.82	76.76	69.17	69.27	69.74	96.28	78.22	73.38	73.79	74.43
63.9942	63.9942	96.88	78.82	73.95	73.93	74.52	94.82	76.76	69.33	69.28	69.71	96.28	78.22	73.83	73.81	74.41
64.0871	64.0871	96.88	78.81	73.68	73.87	74.45	94.82	76.75	69.15	69.24	69.66	96.28	78.21	73.56	73.75	74.34
64.18	64.18	96.88	78.81	73.76	73.86	74.41	94.82	76.75	69.08	69.22	69.62	96.28	78.21	73.65	73.74	74.3
64.2728	64.2728	96.88	78.8	74.12	73.92	74.5	94.82	76.74	69.42	69.26	69.73	96.29	78.21	74	73.8	74.38
64.3657	64.3657	96.88	78.8	73.28	73.81	74.4	94.82	76.73	68.93	69.2	69.67	96.29	78.2	73.15	73.69	74.29
64.4586	64.4586	96.89	78.79	73.11	73.74	74.33	94.82	76.73	68.89	69.17	69.62	96.29	78.2	72.98	73.62	74.21
64.5515	64.5515	96.89	78.79	73.64	73.77	74.31	94.82	76.72	69.19	69.2	69.61	96.29	78.19	73.52	73.65	74.2
64.6444	64.6444	96.89	78.79	73.84	73.81	74.3	94.82	76.72	69.32	69.22	69.61	96.29	78.19	73.73	73.69	74.19
64.7372	64.7372	96.89	78.78	73.56	73.75	74.24	94.83	76.71	69	69.17	69.55	96.3	78.18	73.44	73.63	74.13
64.8301	64.8301	96.89	78.78	73.52	73.72	74.19	94.83	76.71	68.98	69.14	69.51	96.3	78.18	73.4	73.6	74.08
64.923	64.923	96.9	78.77	74.03	73.8	74.56	94.83	76.7	69.4	69.21	69.82	96.3	78.18	73.92	73.68	74.45
65.0159	65.0159	96.9	78.77	73.85	73.79	74.51	94.83	76.7	69	69.17	69.77	96.3	78.17	73.73	73.67	74.4
65.1088	65.1088	96.9	78.76	73.88	73.8	74.48	94.83	76.69	69.22	69.18	69.74	96.31	78.17	73.76	73.69	74.37
65.2016	65.2016	96.9	78.76	73.63	73.76	74.41	94.83	76.69	69.35	69.2	69.72	96.31	78.16	73.51	73.64	74.31
65.2945	65.2945	96.9	78.76	73.28	73.69	74.34	94.83	76.68	69.01	69.15	69.66	96.31	78.16	73.16	73.57	74.23
65.3874	65.3874	96.91	78.75	74.38	73.85	75.22	94.83	76.68	69.67	69.26	70.25	96.31	78.16	74.27	73.73	75.12
65.4803	65.4803	96.91	78.75	75.71	74.2	76.78	94.84	76.67	70.45	69.46	71.12	96.32	78.16	75.61	74.09	76.67
65.5732	65.5732	96.91	78.75	74.63	74.15	76.64	94.84	76.67	69.62	69.4	71.01	96.32	78.15	74.51	74.03	76.53
65.666	65.666	96.91	78.74	74.2	74.08	76.5	94.84	76.66	69.48	69.37	70.91	96.32	78.15	74.08	73.97	76.39
65.7589	65.7589	96.92	78.74	73.46	73.97	76.34	94.84	76.66	68.99	69.3	70.8	96.32	78.14	73.34	73.85	76.23
65.8518	65.8518	96.92	78.73	74.23	74.05	76.26	94.84	76.65	69.57	69.37	70.76	96.32	78.14	74.11	73.93	76.15
65.9447	65.9447	96.92	78.73	73.86	74.02	76.15	94.84	76.65	69.22	69.34	70.67	96.33	78.14	73.75	73.9	76.04
66.0376	66.0376	96.92	78.72	74.7	74.14	76.09	94.84	76.64	69.81	69.42	70.64	96.33	78.13	74.58	74.02	75.98
66.1304	66.1304	96.93	78.72	74.91	74.26	76.05	94.84	76.64	69.97	69.5	70.62	96.33	78.13	74.8	74.14	75.94
66.2233	66.2233	96.93	78.72	74.12	74.17	75.92	94.84	76.63	69.55	69.46	70.54	96.33	78.12	74	74.06	75.81
66.3162	66.3162	96.93	78.71	73.82	74.1	75.81	94.85	76.63	69.39	69.43	70.47	96.34	78.12	73.7	73.99	75.7
66.4091	66.4091	96.93	78.71	74.48	74.19	75.76	94.85	76.62	69.82	69.51	70.45	96.34	78.12	74.37	74.07	75.65
66.5019	66.5019	96.93	78.71	74.84	74.29	75.73	94.85	76.62	69.97	69.57	70.43	96.34	78.11	74.73	74.18	75.62
66.5948	66.5948	96.94	78.7	73.78	74.16	75.59	94.85	76.61	69.26	69.48	70.34	96.34	78.11	73.66	74.04	75.48
66.6877	66.6877	96.94	78.7	74.43	74.23	75.55	94.85	76.61	69.76	69.54	70.32	96.35	78.11	74.32	74.12	75.44
66.7806	66.7806	96.94	78.69	73.35	74.08	75.41	94.85	76.6	68.94	69.43	70.22	96.35	78.1	73.23	73.96	75.3
66.8735	66.8735	96.94	78.69	73.63	74.06	75.33	94.85	76.6	69.1	69.41	70.16	96.35	78.1	73.51	73.94	75.22
66.9663	66.9663	96.94	78.69	73.74	74.05	75.25	94.85	76.59	69.03	69.38	70.11	96.35	78.09	73.61	73.93	75.14
67.0592	67.0592	96.95	78.68	74.08	74.05	75.19	94.85	76.59	69.6	69.42	70.09	96.36	78.09	73.96	73.93	75.08
67.1521	67.1521	96.95	78.68	73.21	73.91	75.06	94.86	76.59	69	69.34	70	96.36	78.09	73.08	73.79	74.94
67.245	67.245	96.95	78.67	72.72	73.78	74.93	94.86	76.58	68.52	69.23	69.9	96.36	78.08	72.59	73.66	74.81
67.3379	67.3379	96.95	78.67	74.21	73.92	75.16	94.86	76.58	69.57	69.34	70.35	96.36	78.08	74.09	73.8	75.05
67.4307	67.4307	96.95	78.66	73.28	73.79	75.03	94.86	76.57	69	69.27	70.26	96.36	78.07	73.16	73.68	74.92
67.5236	67.5236	96.95	78.66	72.81	73.68	74.91	94.86	76.57	68.83	69.22	70.18	96.36	78.07	72.69	73.56	74.8
67.6165	67.6165	96.96	78.65	72.62	73.58	74.79	94.86	76.56	68.78	69.17	70.1	96.37	78.07	72.5	73.46	74.68
67.7094	67.7094	96.96	78.65	73.5	73.63	74.75	94.86	76.56	69.19	69.2	70.06	96.37	78.06	73.39	73.51	74.64
67.8023	67.8023	96.96	78.65	74.17	73.73	74.75	94.86	76.55	69.29	69.21	70.02	96.37	78.06	74.05	73.61	74.63
67.8951	67.8951	96.96	78.64	73.86	73.71	74.68	94.86	76.55	69.27	69.21	69.98	96.37	78.05	73.75	73.59	74.57
67.988	67.988	96.96	78.64	73.82	73.72	74.63	94.87	76.54	69.15	69.19	69.92	96.38	78.05	73.71	73.6	74.52
68.0809	68.0809	96.96	78.63	73.31	73.63	74.54	94.87	76.54	68.8	69.13	69.85	96.38	78.05	73.19	73.51	74.42
68.1738	68.1738	96.97	78.63	73.7	73.68	74.51	94.87	76.53	69.24	69.18	69.84	96.38	78.04	73.58	73.56	74.4
68.2667	68.2667	96.97	78.63	73.13	73.6	74.42	94.87	76.53	68.94	69.14	69.78	96.38	78.04	73	73.48	74.3
68.3595	68.3595	96.97	78.62	73.07	73.56	74.36	94.87	76.52	68.96	69.13	69.74	96.38	78.03	72.94	73.44	74.24
68.4524	68.4524	96.97	78.62	73.4	73.56	74.31	94.87	76.52	68.85	69.1	69.68	96.38	78.03	73.27	73.44	74.19
68.5453	68.5453	96.98	78.62	74.7	73.8	75.37	94.87	76.51	69.63	69.22	70.34	96.39	78.03	74.58	73.68	75.26
68.6382	68.6382	96.98	78.61	74.17	73.79	75.28	94.87	76.51	69.47	69.23	70.28	96.39	78.02	74.06	73.68	75.18
68.7311	68.7311	96.98	78.61	74.46	73.87	75.24	94.87	76.5	69.59	69.26	70.24	96.39	78.02	74.35	73.75	75.13
68.8239	68.8239	96.98	78.6	73.74	73.78	75.13	94.88	76.5	69.18	69.22	70.16	96.39	78.02	73.63	73.66	75.02
68.9168	68.9168	96.98	78.6	73.59	73.75	75.04	94.88	76.49	69.06	69.19	70.1	96.4	78.01	73.47	73.63	74.93
69.0097	69.0097	96.98	78.6	73.7	73.76	74.98	94.88	76.49	69.2	69.21	70.06	96.4	78.01	73.58	73.64	74.87
69.1026	69.1026	96.99	78.59	73.73	73.75	74.91	94.88	76.48	69.2	69.2	70.01	96.4	78.01	73.61	73.63	74.8
69.1955	69.1955	96.99	78.59	73.13	73.65	74.8	94.88	76.48	68.93	69.16	69.94	96.4	78	73	73.53	74.69
69.2883	69.2883	96.99	78.58	74.05	73.75	74.79	94.88	76.47	69.2	69.18	69.91	96.4	78	73.93	73.63	74.68
69.3812	69.3812	96.99	78.58	74.74	73.95	75.2	94.88	76.47	69.78	69.3	70.21	96.41	78	74.62	73.83	75.12
69.4741	69.4741	97	78.58	76.5	74.45	77.71	94.88	76.47	71.66	69.78	72.99	96.41	78	76.35	74.32	77.54
69.567	69.567	97	78.58	75.42	74.42	77.56	94.89	76.46	70.91	69.81	72.86	96.42	77.99	75.28	74.3	77.39
69.6599	69.6599	97	78.57	74.4	74.32	77.39	94.89	76.46	70.17	69.77	72.71	96.42	77.99	74.24	74.19	77.22
69.7527	69.7527	97	78.57	74.11	74.28	77.24	94.89	76.45	69.76	69.73	72.57	96.42	77.98	73.95	74.15	77.08
69.8456	69.8456	97.01	78.57	75.19	74.45	77.17	94.89	76.45	71.46	70.05	72.56	96.42	77.98	74.67	74.25	76.98
69.9385	69.9385	97.01	78.56	75.06	74.51	77.07	94.89	76.44	70.72	70.04	72.44	96.43	77.98	74.72	74.31	76.88
70.0314	70.0314	97.01	78.56	74.17	74.41	76.91	94.89	76.44	69.81	69.95	72.29	96.43	77.97	73.92	74.22	76.73
70.1243	70.1243	97.01	78.55	74.43	74.44	76.81	94.89	76.44	69.84	69.94	72.18	96.43	77.97	74.26	74.26	76.63
70.2171	70.2171	97.02	78.55	74.17	74.41	76.68	94.9	76.43	69.55	69.89	72.05	96.43	77.97	74.03	74.23	76.51
70.31	70.31	97.02	78.55	73.63	74.3	76.53	94.9	76.43	69.15	69.8	71.91	96.43	77.96	73.49	74.13	76.36
70.4029	70.4029	97.02	78.54	73.2	74.18	76.38	94.9	76.42	68.82	69.7	71.77	96.44	77.96	73.06	74.01	76.2
70.4958	70.4958	97.02	78.54	74.24	74.26	76.31	94.9	76.42	69.3	69.7	71.66	96.44	77.96	74.12	74.09	76.13
70.5887	70.5887	97.02	78.54	74.43	74.3	76.23	94.9	76.41	69.61	69.72	71.58	96.44	77.95	74.3	74.14	76.05
70.6815	70.6815	97.03	78.53	75.18	74.48	76.21	94.9	76.41	71.02	70.01	72.01	96.44	77.95	75.01	74.31	76.04
70.7744	70.7744	97.03	78.53	75.22	74.59	76.18	94.9	76.4	70.82	70.1	71.95	96.45	77.95	75.06	74.42	76
70.8673	70.8673	97.03	78.53	74.36	74.5	76.05	94.9	76.4	70.06	70.03	71.83	96.45	77.95	74.16	74.33	75.88
70.9602	70.9602	97.03	78.52	74.05	74.43	75.94	94.91	76.4	69.95	70	71.73	96.45	77.94	73.83	74.25	75.76
71.0531	71.0531	97.04	78.52	74.15	74.42	75.86	94.91	76.39	70.33	70.07	71.67	96.45	77.94	73.88	74.23	75.67
71.1459	71.1459	97.04	78.52	73.9	74.35	75.75	94.91	76.39	70.42	70.1	71.61	96.46	77.93	73.44	74.13	75.55
71.2388	71.2388	97.04	78.51	74.56	74.41	75.71	94.91	76.38	70.2	70.08	71.52	96.46	77.93	74.3	74.2	75.51
71.3317	71.3317	97.04	78.51	74.63	74.45	75.66	94.91	76.38	69.92	70.05	71.43	96.46	77.93	74.45	74.25	75.47
71.4246	71.4246	97.04	78.51	74.39	74.42	75.58	94.91	76.37	69.7	70	71.33	96.46	77.93	74.24	74.23	75.39
71.5175	71.5175	97.05	78.5	74.1	74.37	75.49	94.91	76.37	69.36	69.92	71.22	96.47	77.92	73.97	74.18	75.31
71.6103	71.6103	97.05	78.5	74.21	74.36	75.43	94.91	76.36	69.47	69.89	71.14	96.47	77.92	74.09	74.18	75.25
71.7032	71.7032	97.05	78.49	74.28	74.37	75.38	94.92	76.36	69.43	69.85	71.05	96.47	77.92	74.16	74.19	75.2
71.7961	71.7961	97.05	78.49	73.92	74.3	75.29	94.92	76.36	69.2	69.78	70.95	96.47	77.91	73.8	74.13	75.11
71.889	71.889	97.05	78.49	73.9	74.27	75.21	94.92	76.35	69.31	69.74	70.87	96.47	77.91	73.78	74.1	75.04
71.9819	71.9819	97.06	78.48	74.08	74.26	75.16	94.92	76.35	69.37	69.71	70.8	96.48	77.91	73.97	74.1	74.99
72.0747	72.0747	97.06	78.48	74.27	74.28	75.12	94.92	76.34	69.42	69.69	70.72	96.48	77.9	74.15	74.12	74.95
72.1676	72.1676	97.06	78.48	73.73	74.21	75.03	94.92	76.34	69.14	69.63	70.64	96.48	77.9	73.62	74.05	74.87
72.2605	72.2605	97.06	78.47	73.48	74.12	74.94	94.92	76.33	69.09	69.57	70.55	96.48	77.89	73.36	73.96	74.77
72.3534	72.3534	97.06	78.47	73.83	74.13	74.9	94.92	76.33	69.39	69.58	70.51	96.49	77.89	73.71	73.98	74.74
72.4463	72.4463	97.07	78.47	73.21	74.01	74.79	94.92	76.32	68.85	69.48	70.4	96.49	77.89	73.09	73.86	74.63
72.5391	72.5391	97.07	78.46	73.19	73.96	74.72	94.93	76.32	68.97	69.46	70.34	96.49	77.88	73.07	73.81	74.56
72.632	72.632	97.07	78.46	73.3	73.91	74.65	94.93	76.31	68.93	69.41	70.26	96.49	77.88	73.17	73.76	74.49
72.7249	72.7249	97.07	78.45	74.74	74.1	75.66	94.93	76.31	69.75	69.5	70.3	96.49	77.88	74.63	73.96	75.56
72.8178	72.8178	97.07	78.45	74.19	74.06	75.56	94.93	76.31	69.35	69.46	70.23	96.5	77.87	74.07	73.92	75.46
72.9107	72.9107	97.08	78.45	73.98	74.04	75.48	94.93	76.3	69.33	69.45	70.18	96.5	77.87	73.86	73.91	75.37
73.0035	73.0035	97.08	78.44	73.48	73.95	75.35	94.93	76.3	69.22	69.4	70.12	96.5	77.87	73.37	73.81	75.25
73.0964	73.0964	97.08	78.44	73.71	73.94	75.28	94.93	76.29	69.12	69.37	70.06	96.5	77.86	73.59	73.8	75.17
73.1893	73.1893	97.08	78.44	74.21	74	75.24	94.93	76.29	69.48	69.4	70.04	96.51	77.86	74.09	73.87	75.14
73.2822	73.2822	97.08	78.43	73.82	73.97	75.16	94.93	76.28	69.2	69.38	69.99	96.51	77.86	73.71	73.84	75.06
73.3751	73.3751	97.08	78.43	73.41	73.9	75.06	94.93	76.28	68.95	69.33	69.92	96.51	77.85	73.29	73.77	74.96
73.4679	73.4679	97.09	78.43	73.86	73.93	75.01	94.94	76.28	69.24	69.34	69.9	96.51	77.85	73.74	73.8	74.91
73.5608	73.5608	97.09	78.42	74.62	74.08	75.39	94.94	76.27	69.55	69.4	69.93	96.51	77.85	74.5	73.95	75.27
73.6537	73.6537	97.09	78.42	74.42	74.08	75.32	94.94	76.27	69.43	69.38	69.89	96.52	77.84	74.3	73.96	75.2
73.7466	73.7466	97.09	78.42	73.48	73.96	75.2	94.94	76.26	69.08	69.33	69.83	96.52	77.84	73.36	73.84	75.08
73.8395	73.8395	97.09	78.41	73.39	73.93	75.11	94.94	76.26	69.08	69.32	69.79	96.52	77.84	73.27	73.8	74.99
73.9323	73.9323	97.1	78.41	74.19	74	75.09	94.94	76.25	69.55	69.36	69.8	96.52	77.83	74.08	73.87	74.97
74.0252	74.0252	97.1	78.4	73.88	73.97	75.02	94.94	76.25	69.3	69.35	69.77	96.52	77.83	73.76	73.85	74.9
74.1181	74.1181	97.1	78.4	73.03	73.84	74.89	94.94	76.24	68.77	69.27	69.69	96.53	77.83	72.91	73.71	74.77
74.211	74.211	97.1	78.4	73.2	73.8	74.81	94.94	76.24	68.97	69.25	69.66	96.53	77.82	73.07	73.67	74.69
74.3039	74.3039	97.1	78.39	73.05	73.74	74.73	94.95	76.24	68.69	69.19	69.6	96.53	77.82	72.93	73.62	74.6
74.3967	74.3967	97.11	78.39	73.8	73.8	74.71	94.95	76.23	69.09	69.22	69.59	96.53	77.82	73.68	73.68	74.58
74.4896	74.4896	97.11	78.39	73.93	73.81	74.66	94.95	76.23	69.19	69.21	69.57	96.53	77.81	73.81	73.69	74.54
74.5825	74.5825	97.11	78.38	74.88	74.01	75.66	94.95	76.22	69.75	69.32	70.33	96.54	77.81	74.77	73.89	75.56
74.6754	74.6754	97.11	78.38	74.33	73.99	75.57	94.95	76.22	69.46	69.31	70.26	96.54	77.81	74.22	73.87	75.47
74.7683	74.7683	97.11	78.38	73.96	73.95	75.47	94.95	76.21	69.28	69.29	70.2	96.54	77.8	73.84	73.83	75.37
74.8611	74.8611	97.12	78.37	74.72	74.08	75.46	94.95	76.21	69.93	69.39	70.37	96.54	77.8	74.61	73.96	75.36
74.954	74.954	97.12	78.37	74.82	74.16	75.42	94.95	76.21	69.95	69.44	70.34	96.55	77.8	74.71	74.04	75.32
75.0469	75.0469	97.12	78.37	75.11	74.25	75.41	94.96	76.2	70.05	69.5	70.32	96.55	77.8	75	74.13	75.3
75.1398	75.1398	97.12	78.37	74.76	74.29	75.36	94.96	76.2	69.77	69.51	70.28	96.55	77.79	74.65	74.17	75.26
75.2327	75.2327	97.13	78.36	74.33	74.25	75.29	94.96	76.19	69.47	69.48	70.22	96.55	77.79	74.22	74.14	75.18
75.3255	75.3255	97.13	78.36	73.79	74.19	75.2	94.96	76.19	69.09	69.42	70.15	96.56	77.79	73.68	74.07	75.09
75.4184	75.4184	97.13	78.35	74.03	74.18	75.14	94.96	76.18	69.42	69.44	70.12	96.56	77.78	73.91	74.07	75.04
75.5113	75.5113	97.13	78.35	74.28	74.2	75.1	94.96	76.18	69.7	69.48	70.1	96.56	77.78	74.16	74.09	74.99
75.6042	75.6042	97.13	78.35	73.61	74.1	74.99	94.96	76.18	69.22	69.42	70.03	96.56	77.78	73.49	73.98	74.89
75.6971	75.6971	97.14	78.34	73.99	74.1	74.94	94.96	76.17	69.66	69.46	70.02	96.57	77.77	73.87	73.98	74.84
75.7899	75.7899	97.14	78.34	73.47	74.01	74.85	94.96	76.17	69.19	69.4	69.96	96.57	77.77	73.35	73.9	74.74
75.8828	75.8828	97.14	78.34	73.82	74.04	74.82	94.97	76.16	69.65	69.47	70.13	96.57	77.77	73.71	73.92	74.71
75.9757	75.9757	97.14	78.33	73.22	73.92	74.71	94.97	76.16	69.06	69.38	70.04	96.57	77.76	73.09	73.8	74.6
76.0686	76.0686	97.14	78.33	74.19	74.02	74.95	94.97	76.16	69.38	69.42	70.03	96.57	77.76	74.07	73.9	74.86
76.1615	76.1615	97.14	78.33	73.66	73.95	74.86	94.97	76.15	69.09	69.37	69.96	96.58	77.76	73.54	73.83	74.77
76.2543	76.2543	97.15	78.32	73.48	73.91	74.79	94.97	76.15	69.21	69.37	69.93	96.58	77.75	73.36	73.79	74.69
76.3472	76.3472	97.15	78.32	73.37	73.86	74.71	94.97	76.14	69.08	69.34	69.88	96.58	77.75	73.25	73.74	74.62
76.4401	76.4401	97.15	78.32	73.58	73.87	74.67	94.97	76.14	69.05	69.32	69.84	96.58	77.75	73.46	73.75	74.57
76.533	76.533	97.15	78.31	73.04	73.77	74.57	94.97	76.13	68.67	69.25	69.77	96.58	77.74	72.92	73.65	74.47
76.6258	76.6258	97.15	78.31	72.98	73.69	74.49	94.97	76.13	68.57	69.18	69.7	96.58	77.74	72.85	73.57	74.38
76.7187	76.7187	97.15	78.31	73.59	73.73	74.46	94.97	76.13	69.01	69.2	69.68	96.59	77.74	73.46	73.61	74.36
76.8116	76.8116	97.16	78.3	75.13	74	76.11	94.98	76.12	69.88	69.33	70.5	96.59	77.74	75.02	73.88	76
76.9045	76.9045	97.16	78.3	75.02	74.09	76.04	94.98	76.12	69.75	69.36	70.45	96.59	77.73	74.9	73.97	75.93
76.9974	76.9974	97.16	78.3	75.62	74.28	76.03	94.98	76.11	70.15	69.46	70.45	96.6	77.73	75.5	74.17	75.92
77.0902	77.0902	97.16	78.29	74.61	74.23	75.92	94.98	76.11	69.64	69.44	70.38	96.6	77.73	74.5	74.12	75.81
77.1831	77.1831	97.17	78.29	73.84	74.13	75.79	94.98	76.11	69.04	69.36	70.29	96.6	77.72	73.72	74.02	75.68
77.276	77.276	97.17	78.29	73.79	74.09	75.69	94.98	76.1	69.32	69.36	70.24	96.6	77.72	73.67	73.97	75.58
77.3689	77.3689	97.17	78.28	73.92	74.09	75.6	94.98	76.1	69.24	69.35	70.18	96.6	77.72	73.8	73.97	75.49
77.4618	77.4618	97.17	78.28	73.9	74.08	75.53	94.98	76.09	69.27	69.35	70.14	96.61	77.72	73.78	73.96	75.42
77.5546	77.5546	97.17	78.28	73.54	74	75.41	94.98	76.09	68.85	69.27	70.05	96.61	77.71	73.42	73.88	75.3
77.6475	77.6475	97.18	78.27	73.81	73.98	75.33	94.99	76.08	69.09	69.26	70	96.61	77.71	73.69	73.87	75.22
77.7404	77.7404	97.18	78.27	73.94	74	75.27	94.99	76.08	69.36	69.3	69.98	96.61	77.71	73.82	73.88	75.15
77.8333	77.8333	97.18	78.27	73.92	73.98	75.19	94.99	76.08	69.49	69.32	69.96	96.61	77.7	73.8	73.87	75.08
77.9262	77.9262	97.18	78.26	74.04	74	75.14	94.99	76.07	69.44	69.33	69.93	96.62	77.7	73.92	73.88	75.02
78.019	78.019	97.18	78.26	74.07	74	75.08	94.99	76.07	69.46	69.34	69.9	96.62	77.7	73.96	73.88	74.96
78.1119	78.1119	97.19	78.26	74.24	74.04	75.04	94.99	76.06	69.58	69.38	69.89	96.62	77.69	74.12	73.93	74.93
78.2048	78.2048	97.19	78.25	73.96	74.01	74.97	94.99	76.06	69.34	69.35	69.84	96.62	77.69	73.84	73.9	74.86
78.2977	78.2977	97.19	78.25	73.78	73.97	74.9	94.99	76.06	69.19	69.32	69.8	96.62	77.69	73.67	73.86	74.79
78.3906	78.3906	97.19	78.25	73.55	73.92	74.82	94.99	76.05	68.99	69.28	69.75	96.63	77.68	73.43	73.81	74.71
78.4834	78.4834	97.19	78.24	73.01	73.81	74.71	95	76.05	68.75	69.22	69.68	96.63	77.68	72.89	73.7	74.6
78.5763	78.5763	97.19	78.24	72.78	73.71	74.61	95	76.04	68.64	69.16	69.62	96.63	77.68	72.65	73.59	74.49
78.6692	78.6692	97.2	78.24	74.77	73.94	75.78	95	76.04	69.87	69.3	70.55	96.63	77.67	74.65	73.82	75.66
78.7621	78.7621	97.2	78.24	74.28	73.95	75.69	95	76.04	69.39	69.28	70.47	96.63	77.67	74.17	73.83	75.57
78.855	78.855	97.2	78.23	73.82	73.9	75.58	95	76.03	69.21	69.26	70.4	96.64	77.67	73.7	73.78	75.46
78.9478	78.9478	97.2	78.23	74.03	73.92	75.51	95	76.03	69.28	69.26	70.34	96.64	77.67	73.92	73.8	75.39
79.0407	79.0407	97.2	78.22	73.5	73.84	75.39	95	76.02	69.04	69.22	70.26	96.64	77.66	73.39	73.73	75.27
79.1336	79.1336	97.2	78.22	72.93	73.74	75.26	95	76.02	68.8	69.18	70.18	96.64	77.66	72.81	73.62	75.14
79.2265	79.2265	97.21	78.22	72.92	73.67	75.15	95	76.02	68.73	69.14	70.1	96.64	77.66	72.8	73.56	75.03
79.3194	79.3194	97.21	78.21	73.39	73.68	75.08	95	76.01	68.96	69.14	70.05	96.65	77.65	73.27	73.56	74.96
79.4122	79.4122	97.21	78.21	74	73.78	75.05	95.01	76.01	69.37	69.2	70.04	96.65	77.65	73.89	73.66	74.94
79.5051	79.5051	97.21	78.21	73.61	73.71	74.95	95.01	76	69.27	69.18	69.98	96.65	77.65	73.5	73.59	74.84
79.598	79.598	97.21	78.2	73.35	73.65	74.85	95.01	76	69.1	69.15	69.92	96.65	77.64	73.23	73.53	74.74
79.6909	79.6909	97.22	78.2	73.6	73.67	74.8	95.01	76	69.08	69.15	69.88	96.65	77.64	73.48	73.56	74.69
79.7838	79.7838	97.22	78.2	73.67	73.69	74.75	95.01	75.99	69.26	69.18	69.85	96.66	77.64	73.56	73.57	74.63
79.8766	79.8766	97.22	78.19	73.73	73.67	74.69	95.01	75.99	69.27	69.17	69.81	96.66	77.63	73.61	73.56	74.57
79.9695	79.9695	97.22	78.19	74.19	73.74	74.67	95.01	75.98	69.28	69.17	69.77	96.66	77.63	74.08	73.63	74.55
80.0624	80.0624	97.22	78.19	74.46	73.84	74.72	95.01	75.98	69.52	69.22	69.77	96.66	77.63	74.35	73.72	74.61
80.1553	80.1553	97.23	78.19	75.17	74.03	75.63	95.01	75.98	69.9	69.31	70.17	96.67	77.63	75.06	73.91	75.52
80.2482	80.2482	97.23	78.18	74.13	73.95	75.51	95.02	75.97	69.31	69.27	70.1	96.67	77.62	74.02	73.83	75.4
80.341	80.341	97.23	78.18	73.68	73.9	75.41	95.02	75.97	69	69.22	70.02	96.67	77.62	73.57	73.78	75.3
80.4339	80.4339	97.23	78.18	73.53	73.85	75.31	95.02	75.96	69.14	69.22	69.98	96.67	77.62	73.41	73.73	75.2
80.5268	80.5268	97.23	78.17	73.45	73.81	75.21	95.02	75.96	69.02	69.19	69.92	96.67	77.61	73.33	73.69	75.1
80.6197	80.6197	97.23	78.17	72.86	73.69	75.08	95.02	75.96	68.69	69.13	69.84	96.67	77.61	72.74	73.58	74.97
80.7126	80.7126	97.23	78.17	72.32	73.56	74.95	95.02	75.95	68.28	69.04	69.75	96.68	77.61	72.2	73.45	74.84
80.8054	80.8054	97.24	78.16	73.15	73.6	74.89	95.02	75.95	68.86	69.08	69.74	96.68	77.6	73.03	73.48	74.78
80.8983	80.8983	97.24	78.16	73.74	73.64	74.84	95.02	75.94	69	69.07	69.7	96.68	77.6	73.62	73.52	74.73
80.9912	80.9912	97.24	78.16	74.17	73.73	74.83	95.02	75.94	69.33	69.13	69.69	96.68	77.6	74.06	73.61	74.72
81.0841	81.0841	97.24	78.15	73.99	73.72	74.77	95.02	75.94	69.22	69.13	69.66	96.68	77.59	73.87	73.61	74.66
81.177	81.177	97.25	78.15	74.47	73.84	74.93	95.03	75.93	69.64	69.22	70.07	96.69	77.59	74.36	73.73	74.81
81.2698	81.2698	97.25	78.15	75.06	74.01	75.43	95.03	75.93	70.05	69.32	70.28	96.69	77.59	74.95	73.89	75.31
81.3627	81.3627	97.25	78.14	74.13	73.94	75.32	95.03	75.92	69.41	69.28	70.2	96.69	77.59	74.01	73.82	75.2
81.4556	81.4556	97.25	78.14	74.45	74.02	75.29	95.03	75.92	69.64	69.34	70.18	96.69	77.58	74.33	73.9	75.17
81.5485	81.5485	97.25	78.14	74.56	74.07	75.26	95.03	75.92	69.71	69.37	70.16	96.7	77.58	74.44	73.96	75.14
81.6414	81.6414	97.26	78.14	74.1	74.05	75.18	95.03	75.91	69.41	69.36	70.11	96.7	77.58	73.99	73.93	75.06
81.7342	81.7342	97.26	78.13	73.78	74.01	75.1	95.03	75.91	69.28	69.35	70.06	96.7	77.58	73.67	73.9	74.98
81.8271	81.8271	97.26	78.13	73.63	73.97	75.02	95.03	75.91	69.14	69.33	70.01	96.7	77.57	73.51	73.85	74.9
81.92	81.92	97.26	78.13	73.08	73.85	74.9	95.03	75.9	68.72	69.24	69.92	96.7	77.57	72.96	73.74	74.78
82.0129	82.0129	97.26	78.12	74.05	73.93	74.88	95.04	75.9	69.41	69.3	69.92	96.71	77.57	73.94	73.81	74.77
82.1058	82.1058	97.26	78.12	74.2	73.98	74.86	95.04	75.89	69.41	69.32	69.89	96.71	77.56	74.08	73.87	74.74
82.1986	82.1986	97.27	78.12	73.64	73.93	74.78	95.04	75.89	69.09	69.28	69.84	96.71	77.56	73.52	73.81	74.66
82.2915	82.2915	97.27	78.11	73.25	73.86	74.7	95.04	75.89	69.01	69.26	69.8	96.71	77.56	73.12	73.74	74.58
82.3844	82.3844	97.27	78.11	74.43	74.01	75.34	95.04	75.88	69.85	69.39	70.52	96.71	77.56	74.32	73.89	75.23
82.4773	82.4773	97.27	78.11	73.89	73.97	75.25	95.04	75.88	69.33	69.35	70.44	96.72	77.55	73.77	73.85	75.14
82.5702	82.5702	97.27	78.11	73.54	73.91	75.15	95.04	75.87	69.12	69.32	70.37	96.72	77.55	73.42	73.79	75.04
82.663	82.663	97.28	78.1	73.83	73.92	75.09	95.04	75.87	69.45	69.35	70.33	96.72	77.55	73.71	73.81	74.98
82.7559	82.7559	97.28	78.1	73.77	73.92	75.03	95.04	75.87	69.46	69.37	70.28	96.72	77.54	73.65	73.8	74.92
82.8488	82.8488	97.28	78.1	73.79	73.89	74.95	95.05	75.86	69.32	69.34	70.22	96.72	77.54	73.67	73.77	74.84
82.9417	82.9417	97.28	78.09	75.44	74.21	76.6	95.05	75.86	70.51	69.57	71.39	96.73	77.54	75.34	74.09	76.49
83.0346	83.0346	97.28	78.09	74.03	74.08	76.43	95.05	75.86	69.58	69.5	71.27	96.73	77.54	73.91	73.96	76.33
83.1274	83.1274	97.29	78.09	73.48	74	76.29	95.05	75.85	69.11	69.44	71.16	96.73	77.53	73.36	73.88	76.18
83.2203	83.2203	97.29	78.08	73.11	73.89	76.14	95.05	75.85	68.63	69.33	71.02	96.73	77.53	72.99	73.77	76.03
83.3132	83.3132	97.29	78.08	74.65	74.08	76.11	95.05	75.84	69.46	69.4	70.97	96.74	77.53	74.52	73.97	76.01
83.4061	83.4061	97.29	78.08	74.42	74.11	76.02	95.05	75.84	69.51	69.43	70.9	96.74	77.53	74.3	73.99	75.92
83.499	83.499	97.29	78.08	73.74	74.04	75.9	95.05	75.84	68.99	69.36	70.79	96.74	77.52	73.62	73.92	75.79
83.5918	83.5918	97.29	78.07	73.7	73.99	75.79	95.05	75.83	69.09	69.33	70.71	96.74	77.52	73.58	73.87	75.68
83.6847	83.6847	97.3	78.07	73.67	73.97	75.69	95.06	75.83	68.99	69.31	70.62	96.74	77.52	73.54	73.86	75.58
83.7776	83.7776	97.3	78.07	72.91	73.84	75.54	95.06	75.83	68.5	69.21	70.51	96.75	77.51	72.78	73.72	75.43
83.8705	83.8705	97.3	78.06	73.6	73.89	75.48	95.06	75.82	69.27	69.29	70.48	96.75	77.51	73.48	73.77	75.37
83.9634	83.9634	97.3	78.06	73.55	73.86	75.39	95.06	75.82	69.19	69.28	70.41	96.75	77.51	73.43	73.74	75.28
84.0562	84.0562	97.3	78.06	73.28	73.8	75.28	95.06	75.81	69.1	69.25	70.34	96.75	77.51	73.16	73.68	75.17
84.1491	84.1491	97.31	78.05	73.46	73.79	75.2	95.06	75.81	69.19	69.26	70.28	96.75	77.5	73.34	73.67	75.09
84.242	84.242	97.31	78.05	74.47	73.92	75.19	95.06	75.81	69.84	69.37	70.34	96.76	77.5	74.35	73.8	75.08
84.3349	84.3349	97.31	78.05	74.11	73.92	75.13	95.06	75.8	69.44	69.35	70.28	96.76	77.5	74	73.8	75.01
84.4278	84.4278	97.31	78.05	73.8	73.9	75.05	95.06	75.8	69.35	69.35	70.23	96.76	77.5	73.69	73.78	74.94
84.5206	84.5206	97.31	78.04	72.98	73.77	74.92	95.07	75.8	68.71	69.25	70.13	96.76	77.49	72.86	73.65	74.81
84.6135	84.6135	97.31	78.04	74.07	73.88	74.92	95.07	75.79	69.17	69.29	70.1	96.76	77.49	73.95	73.77	74.81
84.7064	84.7064	97.32	78.04	74.83	74.05	75.44	95.07	75.79	69.83	69.4	70.43	96.77	77.49	74.72	73.93	75.33
84.7993	84.7993	97.32	78.04	75.13	74.18	75.43	95.07	75.79	70.04	69.47	70.42	96.77	77.49	75.02	74.06	75.32
84.8922	84.8922	97.32	78.03	74.33	74.13	75.34	95.07	75.78	69.35	69.41	70.33	96.77	77.48	74.21	74.01	75.23
84.985	84.985	97.32	78.03	73.97	74.08	75.25	95.07	75.78	69.31	69.39	70.27	96.77	77.48	73.85	73.96	75.14
85.0779	85.0779	97.33	78.03	74.36	74.13	75.22	95.07	75.77	69.84	69.47	70.27	96.78	77.48	74.25	74.01	75.1
85.1708	85.1708	97.33	78.02	74.61	74.2	75.19	95.07	75.77	69.77	69.49	70.24	96.78	77.48	74.5	74.08	75.08
85.2637	85.2637	97.33	78.02	74.86	74.27	75.18	95.07	75.77	69.82	69.52	70.21	96.78	77.47	74.74	74.15	75.07
85.3566	85.3566	97.33	78.02	75.35	74.43	75.81	95.08	75.76	70.02	69.59	70.28	96.78	77.47	75.24	74.32	75.71
85.4494	85.4494	97.34	78.02	74.96	74.45	75.75	95.08	75.76	69.94	69.62	70.26	96.79	77.47	74.85	74.33	75.64
85.5423	85.5423	97.34	78.02	74.62	74.44	75.68	95.08	75.76	69.86	69.63	70.23	96.79	77.47	74.51	74.32	75.57
85.6352	85.6352	97.34	78.01	74.2	74.38	75.58	95.08	75.75	69.52	69.59	70.17	96.79	77.46	74.08	74.26	75.47
85.7281	85.7281	97.34	78.01	73.88	74.32	75.49	95.08	75.75	69.08	69.52	70.09	96.79	77.46	73.76	74.2	75.38
85.821	85.821	97.34	78.01	73.67	74.25	75.39	95.08	75.75	69.16	69.49	70.04	96.79	77.46	73.55	74.13	75.28
85.9138	85.9138	97.34	78	73.41	74.17	75.29	95.08	75.74	69.11	69.46	69.99	96.8	77.46	73.29	74.05	75.18
86.0067	86.0067	97.35	78	73.36	74.1	75.19	95.08	75.74	69.1	69.42	69.94	96.8	77.45	73.23	73.98	75.08
86.0996	86.0996	97.35	78	73.49	74.05	75.1	95.08	75.73	69.04	69.39	69.89	96.8	77.45	73.37	73.93	75
86.1925	86.1925	97.35	77.99	73.7	74.02	75.03	95.09	75.73	69.09	69.35	69.84	96.8	77.45	73.58	73.9	74.92
86.2854	86.2854	97.35	77.99	74.86	74.22	75.55	95.09	75.73	69.83	69.47	70.54	96.8	77.45	74.74	74.1	75.63
86.3782	86.3782	97.35	77.99	74.35	74.19	75.47	95.09	75.72	69.49	69.44	70.47	96.81	77.44	74.24	74.08	75.54
86.4711	86.4711	97.36	77.99	74.19	74.19	75.4	95.09	75.72	69.55	69.47	70.43	96.81	77.44	74.08	74.07	75.46
86.564	86.564	97.36	77.98	74.74	74.29	75.39	95.09	75.72	69.9	69.54	70.42	96.81	77.44	74.63	74.18	75.44
86.6569	86.6569	97.36	77.98	74.58	74.29	75.33	95.09	75.71	69.77	69.55	70.37	96.81	77.44	74.47	74.18	75.37
86.7498	86.7498	97.36	77.98	74.01	74.22	75.23	95.09	75.71	69.34	69.49	70.29	96.82	77.43	73.9	74.1	75.27
86.8426	86.8426	97.36	77.98	74.25	74.25	75.19	95.09	75.71	69.61	69.53	70.27	96.82	77.43	74.14	74.13	75.22
86.9355	86.9355	97.37	77.97	74.81	74.33	75.19	95.1	75.7	70.06	69.6	70.28	96.82	77.43	74.71	74.21	75.21
87.0284	87.0284	97.37	77.97	74.2	74.26	75.1	95.1	75.7	69.61	69.55	70.22	96.82	77.43	74.09	74.14	75.12
87.1213	87.1213	97.37	77.97	74.64	74.32	75.09	95.1	75.7	69.81	69.59	70.2	96.82	77.42	74.52	74.2	75.1
87.2142	87.2142	97.37	77.97	75	74.4	75.14	95.1	75.69	70.19	69.66	70.38	96.83	77.42	74.89	74.28	75.09
87.307	87.307	97.37	77.96	74.4	74.35	75.07	95.1	75.69	69.75	69.64	70.32	96.83	77.42	74.29	74.24	75.02
87.3999	87.3999	97.38	77.96	74.14	74.29	75	95.1	75.69	69.72	69.62	70.27	96.83	77.42	74.03	74.18	74.94
87.4928	87.4928	97.38	77.96	74.27	74.31	74.96	95.1	75.68	69.6	69.61	70.23	96.83	77.41	74.15	74.19	74.91
87.5857	87.5857	97.38	77.96	74.43	74.32	74.94	95.1	75.68	69.62	69.61	70.19	96.84	77.41	74.32	74.2	74.88
87.6785	87.6785	97.38	77.95	74.33	74.31	74.89	95.1	75.68	69.45	69.58	70.14	96.84	77.41	74.21	74.19	74.83
87.7714	87.7714	97.38	77.95	73.69	74.22	74.81	95.11	75.67	69.12	69.53	70.08	96.84	77.41	73.58	74.11	74.75
87.8643	87.8643	97.38	77.95	73.11	74.11	74.71	95.11	75.67	68.65	69.43	69.99	96.84	77.4	72.98	73.99	74.64
87.9572	87.9572	97.39	77.94	73.03	74.01	74.62	95.11	75.66	68.79	69.38	69.93	96.84	77.4	72.91	73.9	74.55
88.0501	88.0501	97.39	77.94	73.63	74.02	74.59	95.11	75.66	69.09	69.38	69.89	96.84	77.4	73.5	73.9	74.52
88.1429	88.1429	97.39	77.94	74.34	74.12	75.05	95.11	75.66	69.8	69.48	70.46	96.85	77.4	74.23	74	74.96
88.2358	88.2358	97.39	77.94	73.95	74.07	74.97	95.11	75.65	69.54	69.46	70.4	96.85	77.39	73.83	73.96	74.89
88.3287	88.3287	97.39	77.93	73.93	74.05	74.91	95.11	75.65	69.46	69.45	70.34	96.85	77.39	73.8	73.93	74.82
88.4216	88.4216	97.4	77.93	73.83	74.02	74.85	95.11	75.65	69.27	69.42	70.28	96.85	77.39	73.7	73.9	74.76
88.5145	88.5145	97.4	77.93	74.87	74.2	75.74	95.11	75.64	69.69	69.49	70.27	96.86	77.39	74.76	74.09	75.64
88.6073	88.6073	97.4	77.93	74.3	74.18	75.65	95.11	75.64	69.45	69.49	70.22	96.86	77.38	74.18	74.07	75.55
88.7002	88.7002	97.4	77.92	73.49	74.06	75.52	95.12	75.64	69.11	69.42	70.14	96.86	77.38	73.38	73.95	75.41
88.7931	88.7931	97.4	77.92	73.36	73.99	75.4	95.12	75.63	68.96	69.36	70.07	96.86	77.38	73.24	73.87	75.3
88.886	88.886	97.4	77.92	73.04	73.89	75.28	95.12	75.63	68.91	69.32	70	96.86	77.37	72.92	73.77	75.18
88.9789	88.9789	97.41	77.91	72.64	73.77	75.15	95.12	75.63	68.66	69.24	69.92	96.86	77.37	72.52	73.65	75.05
89.0717	89.0717	97.41	77.91	72.54	73.68	75.04	95.12	75.62	68.49	69.18	69.85	96.87	77.37	72.41	73.57	74.93
89.1646	89.1646	97.41	77.91	71.99	73.53	74.89	95.12	75.62	68.08	69.07	69.74	96.87	77.36	71.86	73.41	74.78
89.2575	89.2575	97.41	77.9	72.66	73.52	74.81	95.12	75.61	68.53	69.07	69.71	96.87	77.36	72.54	73.4	74.71
89.3504	89.3504	97.41	77.9	73.48	73.55	74.76	95.12	75.61	69.12	69.1	69.69	96.87	77.36	73.37	73.43	74.66
89.4433	89.4433	97.41	77.9	73.35	73.52	74.68	95.12	75.61	68.8	69.05	69.63	96.87	77.36	73.23	73.4	74.57
89.5361	89.5361	97.41	77.89	73.77	73.56	74.64	95.12	75.6	69.19	69.08	69.61	96.87	77.35	73.65	73.44	74.54
89.629	89.629	97.42	77.89	72.81	73.44	74.52	95.13	75.6	68.64	69.01	69.54	96.88	77.35	72.68	73.32	74.41
89.7219	89.7219	97.42	77.89	72.64	73.36	74.42	95.13	75.6	68.48	68.96	69.48	96.88	77.35	72.52	73.24	74.31
89.8148	89.8148	97.42	77.89	73.9	73.51	74.75	95.13	75.59	69.13	69.02	69.61	96.88	77.35	73.78	73.39	74.65
89.9077	89.9077	97.42	77.88	74.63	73.71	75.38	95.13	75.59	69.6	69.12	70.12	96.88	77.34	74.52	73.59	75.09
90.0005	90.0005	97.42	77.88	74.35	73.75	75.32	95.13	75.59	69.62	69.18	70.09	96.88	77.34	74.24	73.63	75.03
90.0934	90.0934	97.43	77.88	73.47	73.65	75.19	95.13	75.58	68.88	69.09	70	96.89	77.34	73.35	73.53	74.91
90.1863	90.1863	97.43	77.88	73.76	73.67	75.13	95.13	75.58	68.98	69.09	69.95	96.89	77.34	73.64	73.56	74.85
90.2792	90.2792	97.43	77.87	74.47	73.81	75.12	95.13	75.58	69.56	69.18	70.01	96.89	77.33	74.36	73.7	74.93
90.3721	90.3721	97.43	77.87	73.82	73.75	75.02	95.13	75.57	69.06	69.12	69.93	96.89	77.33	73.7	73.63	74.83
90.4649	90.4649	97.43	77.87	73.92	73.76	74.96	95.13	75.57	69.23	69.14	69.9	96.89	77.33	73.81	73.64	74.78
90.5578	90.5578	97.43	77.86	73.9	73.76	74.89	95.14	75.57	69.21	69.14	69.86	96.9	77.33	73.78	73.64	74.71
90.6507	90.6507	97.44	77.86	74.82	73.94	75.45	95.14	75.56	69.83	69.25	70.28	96.9	77.32	74.71	73.82	75.34
90.7436	90.7436	97.44	77.86	75.23	74.11	75.59	95.14	75.56	70.23	69.38	70.55	96.9	77.32	75.13	73.99	75.48
90.8365	90.8365	97.44	77.86	74.03	73.99	75.45	95.14	75.56	69.36	69.3	70.45	96.9	77.32	73.91	73.87	75.34
90.9293	90.9293	97.44	77.86	74.41	74.05	75.41	95.14	75.55	69.61	69.34	70.41	96.91	77.32	74.29	73.93	75.3
91.0222	91.0222	97.44	77.85	74.11	74.03	75.33	95.14	75.55	69.36	69.33	70.34	96.91	77.32	73.99	73.92	75.22
91.1151	91.1151	97.45	77.85	74.14	74.05	75.27	95.14	75.55	69.41	69.35	70.3	96.91	77.31	74.02	73.94	75.16
91.208	91.208	97.45	77.85	74.27	74.11	75.24	95.14	75.54	69.36	69.37	70.26	96.91	77.31	74.15	74	75.13
91.3009	91.3009	97.45	77.85	74.14	74.11	75.18	95.14	75.54	69.36	69.37	70.21	96.91	77.31	74.02	73.99	75.07
91.3937	91.3937	97.45	77.84	74.44	74.15	75.14	95.15	75.54	69.44	69.37	70.17	96.92	77.31	74.32	74.04	75.03
91.4866	91.4866	97.45	77.84	74.38	74.16	75.09	95.15	75.53	69.69	69.42	70.15	96.92	77.3	74.27	74.05	74.98
91.5795	91.5795	97.46	77.84	74.57	74.21	75.07	95.15	75.53	69.8	69.46	70.13	96.92	77.3	74.46	74.09	74.96
91.6724	91.6724	97.46	77.84	73.62	74.08	74.95	95.15	75.53	69.19	69.38	70.05	96.92	77.3	73.51	73.96	74.84
91.7653	91.7653	97.46	77.83	74.77	74.22	75.47	95.15	75.52	69.94	69.49	70.4	96.92	77.3	74.66	74.1	75.37
91.8581	91.8581	97.46	77.83	74.22	74.18	75.38	95.15	75.52	69.48	69.45	70.33	96.93	77.3	74.1	74.06	75.28
91.951	91.951	97.46	77.83	73.75	74.09	75.28	95.15	75.52	69.18	69.4	70.25	96.93	77.29	73.64	73.98	75.18
92.0439	92.0439	97.47	77.83	73.96	74.1	75.22	95.15	75.51	69.43	69.42	70.22	96.93	77.29	73.84	73.98	75.12
92.1368	92.1368	97.47	77.82	73.97	74.09	75.16	95.15	75.51	69.26	69.39	70.16	96.93	77.29	73.86	73.98	75.05
92.2297	92.2297	97.47	77.82	74.13	74.11	75.11	95.16	75.51	69.45	69.41	70.13	96.93	77.29	74.01	73.99	75
92.3225	92.3225	97.47	77.82	74.74	74.19	75.1	95.16	75.5	69.92	69.48	70.13	96.94	77.28	74.62	74.08	74.99
92.4154	92.4154	97.47	77.82	74.35	74.18	75.04	95.16	75.5	69.64	69.48	70.09	96.94	77.28	74.24	74.06	74.94
92.5083	92.5083	97.47	77.81	73.66	74.09	74.94	95.16	75.5	69.04	69.4	70.01	96.94	77.28	73.55	73.98	74.84
92.6012	92.6012	97.48	77.81	73.07	73.97	74.83	95.16	75.49	68.7	69.32	69.93	96.94	77.28	72.95	73.85	74.72
92.6941	92.6941	97.48	77.81	73.98	74.03	74.82	95.16	75.49	69.29	69.36	69.92	96.94	77.27	73.86	73.92	74.71
92.7869	92.7869	97.48	77.8	73.86	74.01	74.76	95.16	75.49	69.18	69.33	69.87	96.95	77.27	73.74	73.89	74.65
92.8798	92.8798	97.48	77.8	74.1	74.03	74.73	95.16	75.48	69.34	69.34	69.84	96.95	77.27	73.99	73.92	74.63
92.9727	92.9727	97.48	77.8	74.43	74.07	74.72	95.16	75.48	69.56	69.36	69.83	96.95	77.27	74.31	73.96	74.61
93.0656	93.0656	97.49	77.8	74.03	74.06	74.67	95.16	75.48	69.35	69.36	69.8	96.95	77.26	73.92	73.94	74.56
93.1585	93.1585	97.49	77.8	74	74.04	74.63	95.17	75.47	69.56	69.39	69.79	96.95	77.26	73.89	73.93	74.52
93.2513	93.2513	97.49	77.79	74.5	74.14	75.02	95.17	75.47	69.79	69.46	70.13	96.96	77.26	74.39	74.03	74.98
93.3442	93.3442	97.49	77.79	75.76	74.39	76.35	95.17	75.47	70.56	69.61	70.94	96.96	77.26	75.65	74.28	76.24
93.4371	93.4371	97.49	77.79	75.23	74.42	76.27	95.17	75.46	70.12	69.61	70.88	96.96	77.26	75.12	74.31	76.16
93.53	93.53	97.5	77.79	74.18	74.3	76.12	95.17	75.46	69.57	69.55	70.78	96.96	77.25	74.07	74.18	76.01
93.6229	93.6229	97.5	77.78	74.31	74.3	76.03	95.17	75.46	69.7	69.57	70.72	96.97	77.25	74.2	74.19	75.92
93.7157	93.7157	97.5	77.78	75.48	74.5	76.11	95.17	75.46	70.26	69.66	70.71	96.97	77.25	75.37	74.38	76.01
93.8086	93.8086	97.5	77.78	74.29	74.37	75.97	95.17	75.45	69.43	69.57	70.6	96.97	77.25	74.17	74.26	75.87
93.9015	93.9015	97.5	77.78	73.36	74.23	75.82	95.17	75.45	68.9	69.48	70.5	96.97	77.25	73.24	74.11	75.72
93.9944	93.9944	97.51	77.77	73.75	74.21	75.73	95.18	75.45	69.28	69.49	70.45	96.97	77.24	73.63	74.1	75.63
94.0873	94.0873	97.51	77.77	73.75	74.17	75.64	95.18	75.44	69.34	69.48	70.39	96.98	77.24	73.63	74.06	75.53
94.1801	94.1801	97.51	77.77	74.37	74.24	75.59	95.18	75.44	69.5	69.49	70.35	96.98	77.24	74.26	74.12	75.49
94.273	94.273	97.51	77.77	74.02	74.18	75.49	95.18	75.44	69.27	69.45	70.28	96.98	77.24	73.9	74.07	75.39
94.3659	94.3659	97.51	77.76	74.03	74.17	75.42	95.18	75.43	69.41	69.45	70.23	96.98	77.23	73.91	74.05	75.31
94.4588	94.4588	97.51	77.76	74.67	74.24	75.39	95.18	75.43	69.83	69.5	70.22	96.98	77.23	74.56	74.12	75.28
94.5517	94.5517	97.52	77.76	74.9	74.3	75.36	95.18	75.43	69.91	69.53	70.19	96.99	77.23	74.79	74.19	75.25
94.6445	94.6445	97.52	77.76	74.52	74.31	75.31	95.18	75.42	69.71	69.54	70.16	96.99	77.23	74.41	74.19	75.2
94.7374	94.7374	97.52	77.76	74.86	74.41	75.39	95.19	75.42	70.05	69.63	70.48	96.99	77.23	74.74	74.29	75.27
94.8303	94.8303	97.52	77.75	74.52	74.39	75.32	95.19	75.42	69.86	69.63	70.43	96.99	77.22	74.41	74.27	75.2
94.9232	94.9232	97.53	77.75	74.47	74.39	75.27	95.19	75.41	69.72	69.62	70.38	97	77.22	74.36	74.27	75.15
95.0161	95.0161	97.53	77.75	74.63	74.43	75.25	95.19	75.41	69.86	69.65	70.36	97	77.22	74.52	74.32	75.13
95.1089	95.1089	97.53	77.75	74.64	74.44	75.21	95.19	75.41	69.86	69.67	70.33	97	77.22	74.52	74.33	75.09
95.2018	95.2018	97.53	77.75	75.36	74.58	75.8	95.19	75.4	70.25	69.75	70.52	97	77.22	75.25	74.46	75.69
95.2947	95.2947	97.53	77.74	75.24	74.65	75.77	95.19	75.4	70.08	69.77	70.49	97.01	77.22	75.13	74.54	75.66
95.3876	95.3876	97.54	77.74	74.12	74.51	75.64	95.19	75.4	69.46	69.69	70.41	97.01	77.21	74	74.4	75.53
95.4805	95.4805	97.54	77.74	73.71	74.41	75.53	95.19	75.4	69.34	69.65	70.34	97.01	77.21	73.59	74.3	75.42
95.5733	95.5733	97.54	77.74	73.88	74.37	75.44	95.2	75.39	69.45	69.63	70.29	97.01	77.21	73.76	74.26	75.33
95.6662	95.6662	97.54	77.73	73.96	74.35	75.37	95.2	75.39	69.37	69.61	70.24	97.01	77.21	73.84	74.24	75.27
95.7591	95.7591	97.54	77.73	73.11	74.19	75.23	95.2	75.39	68.69	69.49	70.14	97.01	77.2	72.99	74.08	75.12
95.852	95.852	97.55	77.73	75.76	74.52	76.94	95.2	75.38	71.19	69.83	72.32	97.02	77.2	75.59	74.39	76.75
95.9449	95.9449	97.55	77.73	75.66	74.64	76.87	95.2	75.38	71.15	69.97	72.26	97.02	77.2	75.5	74.51	76.69
96.0377	96.0377	97.55	77.73	75.51	74.7	76.79	95.2	75.38	70.75	69.99	72.16	97.02	77.2	75.36	74.57	76.61
96.1306	96.1306	97.55	77.72	74.5	74.59	76.65	95.2	75.37	69.78	69.89	72.02	97.03	77.2	74.33	74.46	76.46
96.2235	96.2235	97.55	77.72	74.52	74.58	76.54	95.2	75.37	70.05	69.92	71.93	97.03	77.19	74.34	74.44	76.36
96.3164	96.3164	97.56	77.72	75.04	74.69	76.49	95.21	75.37	70.89	70.11	71.91	97.03	77.19	74.69	74.51	76.29
96.4093	96.4093	97.56	77.72	73.7	74.5	76.32	95.21	75.37	69.55	69.95	71.75	97.03	77.19	73.42	74.33	76.12
96.5021	96.5021	97.56	77.71	73.39	74.38	76.17	95.21	75.36	69.02	69.82	71.61	97.03	77.19	73.19	74.21	75.98
96.595	96.595	97.56	77.71	73.93	74.38	76.09	95.21	75.36	69.36	69.81	71.51	97.04	77.19	73.77	74.21	75.89
96.6879	96.6879	97.56	77.71	74.17	74.36	75.99	95.21	75.36	69.52	69.79	71.42	97.04	77.18	74.04	74.2	75.8
96.7808	96.7808	97.56	77.71	74.03	74.31	75.89	95.21	75.35	69.42	69.74	71.31	97.04	77.18	73.91	74.15	75.7
96.8737	96.8737	97.57	77.7	74.1	74.29	75.8	95.21	75.35	69.28	69.68	71.2	97.04	77.18	73.97	74.13	75.61
96.9665	96.9665	97.57	77.7	74.35	74.32	75.73	95.21	75.35	69.46	69.69	71.13	97.04	77.18	74.24	74.17	75.55
97.0594	97.0594	97.57	77.7	74.64	74.36	75.68	95.21	75.34	70.38	69.81	71.12	97.05	77.18	74.45	74.2	75.49
97.1523	97.1523	97.57	77.7	74.63	74.4	75.63	95.22	75.34	70.79	69.96	71.21	97.05	77.17	74.27	74.21	75.43
97.2452	97.2452	97.57	77.7	74.26	74.37	75.55	95.22	75.34	70.03	69.9	71.12	97.05	77.17	74.02	74.19	75.36
97.338	97.338	97.58	77.69	74.28	74.35	75.48	95.22	75.34	69.87	69.88	71.04	97.05	77.17	74.1	74.17	75.29
97.4309	97.4309	97.58	77.69	75.3	74.52	75.95	95.22	75.33	72	70.28	73.1	97.05	77.17	74.53	74.24	75.26
97.5238	97.5238	97.58	77.69	74.36	74.42	75.82	95.22	75.33	70.82	70.21	72.95	97.06	77.16	73.83	74.15	75.16
97.6167	97.6167	97.58	77.69	73.68	74.31	75.7	95.22	75.33	69.65	70.07	72.77	97.06	77.16	73.33	74.04	75.05
97.7096	97.7096	97.58	77.68	74.12	74.32	75.63	95.22	75.32	69.61	70.02	72.63	97.06	77.16	73.91	74.07	75.01
97.8024	97.8024	97.59	77.68	74.54	74.37	75.59	95.22	75.32	69.67	69.99	72.5	97.06	77.16	74.38	74.13	74.99
97.8953	97.8953	97.59	77.68	74.54	74.4	75.54	95.23	75.32	69.74	69.98	72.38	97.06	77.16	74.41	74.17	74.97
97.9882	97.9882	97.59	77.68	73.3	74.23	75.39	95.23	75.32	68.91	69.84	72.21	97.07	77.15	73.16	74	74.83
98.0811	98.0811	97.59	77.68	73.89	74.23	75.33	95.23	75.31	69.29	69.82	72.09	97.07	77.15	73.77	74.01	74.79
98.174	98.174	97.59	77.67	74.46	74.31	75.31	95.23	75.31	69.58	69.83	71.99	97.07	77.15	74.35	74.11	74.98
98.2668	98.2668	97.6	77.67	74.33	74.33	75.27	95.23	75.31	69.46	69.81	71.88	97.07	77.15	74.21	74.14	74.95
98.3597	98.3597	97.6	77.67	73.65	74.22	75.16	95.23	75.3	69.01	69.7	71.73	97.07	77.15	73.53	74.03	74.85
98.4526	98.4526	97.6	77.67	73.74	74.17	75.08	95.23	75.3	69.11	69.65	71.61	97.08	77.14	73.62	73.98	74.77
98.5455	98.5455	97.6	77.66	74.12	74.19	75.04	95.23	75.3	69.29	69.63	71.5	97.08	77.14	74.01	74.01	74.74
98.6384	98.6384	97.6	77.66	74.27	74.2	75	95.23	75.29	69.47	69.62	71.41	97.08	77.14	74.15	74.03	74.71
98.7312	98.7312	97.6	77.66	74.56	74.22	74.97	95.24	75.29	69.59	69.61	71.32	97.08	77.14	74.44	74.05	74.69
98.8241	98.8241	97.61	77.66	74.63	74.27	74.95	95.24	75.29	69.73	69.64	71.24	97.08	77.14	74.51	74.11	74.69
98.917	98.917	97.61	77.66	74.32	74.24	74.9	95.24	75.28	69.36	69.58	71.13	97.09	77.13	74.2	74.09	74.64
99.0099	99.0099	97.61	77.65	74.16	74.22	74.85	95.24	75.28	69.35	69.56	71.04	97.09	77.13	74.05	74.06	74.6
99.1028	99.1028	97.61	77.65	74.36	74.25	74.83	95.24	75.28	69.64	69.59	70.98	97.09	77.13	74.25	74.1	74.59
99.1956	99.1956	97.61	77.65	74.21	74.22	74.78	95.24	75.28	69.57	69.58	70.9	97.09	77.13	74.09	74.08	74.54
99.2885	99.2885	97.62	77.65	73.88	74.16	74.71	95.24	75.27	69.46	69.55	70.82	97.09	77.12	73.77	74.01	74.48
99.3814	99.3814	97.62	77.64	73.91	74.13	74.66	95.24	75.27	69.47	69.54	70.75	97.1	77.12	73.8	73.99	74.44
99.4743	99.4743	97.62	77.64	73.23	74.01	74.56	95.24	75.27	69.03	69.46	70.64	97.1	77.12	73.11	73.87	74.34
99.5672	99.5672	97.62	77.64	73.58	74.01	74.53	95.24	75.26	69.2	69.46	70.58	97.1	77.12	73.46	73.87	74.31
99.66	99.66	97.62	77.64	73.65	73.99	74.49	95.25	75.26	69.2	69.44	70.51	97.1	77.12	73.53	73.85	74.28
99.7529	99.7529	97.62	77.63	73.17	73.89	74.4	95.25	75.26	68.97	69.38	70.42	97.1	77.11	73.05	73.75	74.19
99.8458	99.8458	97.62	77.63	74.13	73.97	74.72	95.25	75.25	69.4	69.41	70.38	97.1	77.11	74.01	73.83	74.6
99.9387	99.9387	97.63	77.63	73.59	73.91	74.65	95.25	75.25	68.88	69.34	70.29	97.11	77.11	73.47	73.78	74.53
100.032	100.032	97.63	77.63	74.32	74.01	74.95	95.25	75.25	69.37	69.38	70.26	97.11	77.11	74.21	73.88	74.83
100.124	100.124	97.63	77.62	74.42	74.04	74.91	95.25	75.25	69.71	69.42	70.23	97.11	77.1	74.31	73.91	74.79
100.217	100.217	97.63	77.62	73.83	73.97	74.82	95.25	75.24	69.36	69.38	70.17	97.11	77.1	73.71	73.84	74.71
100.31	100.31	97.63	77.62	74.12	73.99	74.79	95.25	75.24	69.31	69.36	70.11	97.11	77.1	74	73.87	74.68
100.403	100.403	97.63	77.62	73.63	73.93	74.71	95.25	75.24	69.25	69.35	70.06	97.12	77.1	73.51	73.8	74.59
100.496	100.496	97.64	77.62	73.51	73.89	74.64	95.25	75.23	69.09	69.32	70.01	97.12	77.1	73.4	73.76	74.53
100.589	100.589	97.64	77.61	73.2	73.81	74.55	95.26	75.23	68.76	69.25	69.93	97.12	77.09	73.08	73.68	74.44
100.682	100.682	97.64	77.61	72.87	73.72	74.46	95.26	75.23	68.29	69.15	69.83	97.12	77.09	72.75	73.59	74.35
100.775	100.775	97.64	77.61	73.29	73.72	74.42	95.26	75.22	68.95	69.19	69.82	97.12	77.09	73.17	73.59	74.31
100.867	100.867	97.64	77.61	73.76	73.77	74.41	95.26	75.22	69.26	69.22	69.8	97.12	77.09	73.65	73.64	74.3
100.96	100.96	97.64	77.6	74.39	73.87	74.8	95.26	75.22	69.69	69.3	70.04	97.13	77.08	74.28	73.75	74.69
101.053	101.053	97.65	77.6	75.23	74.05	75.57	95.26	75.22	70.28	69.41	70.44	97.13	77.08	75.11	73.93	75.45
101.146	101.146	97.65	77.6	74.7	74.07	75.5	95.26	75.21	69.78	69.41	70.38	97.13	77.08	74.59	73.94	75.38
101.239	101.239	97.65	77.6	74.94	74.15	75.46	95.26	75.21	70.42	69.53	70.66	97.13	77.08	74.79	74.02	75.34
101.332	101.332	97.65	77.6	75.14	74.28	75.46	95.27	75.21	70.9	69.74	71.13	97.14	77.08	74.98	74.15	75.34
101.425	101.425	97.66	77.59	74.59	74.25	75.38	95.27	75.2	70.37	69.75	71.06	97.14	77.08	74.4	74.11	75.26
101.518	101.518	97.66	77.59	74.38	74.25	75.32	95.27	75.2	69.97	69.74	70.99	97.14	77.07	74.22	74.11	75.19
101.611	101.611	97.66	77.59	74.7	74.3	75.29	95.27	75.2	70.3	69.81	70.95	97.14	77.07	74.55	74.16	75.16
101.703	101.703	97.66	77.59	74.93	74.37	75.27	95.27	75.2	71.42	70.07	72.13	97.14	77.07	74.45	74.16	75.11
101.796	101.796	97.66	77.59	74.9	74.41	75.25	95.27	75.19	70.67	70.05	72.02	97.15	77.07	74.62	74.22	75.09
101.889	101.889	97.66	77.58	73.95	74.29	75.13	95.27	75.19	69.69	69.93	71.87	97.15	77.07	73.73	74.1	74.98
101.982	101.982	97.67	77.58	73.46	74.18	75.03	95.27	75.19	69.08	69.81	71.72	97.15	77.06	73.28	73.99	74.87
102.075	102.075	97.67	77.58	73.52	74.14	74.96	95.27	75.19	69.09	69.76	71.61	97.15	77.06	73.38	73.96	74.8
102.168	102.168	97.67	77.58	73.88	74.15	74.92	95.28	75.18	69.49	69.77	71.52	97.15	77.06	73.75	73.98	74.77
102.261	102.261	97.67	77.57	74.04	74.14	74.87	95.28	75.18	69.36	69.72	71.41	97.15	77.06	73.92	73.97	74.72
102.354	102.354	97.67	77.57	74.18	74.13	74.83	95.28	75.18	69.23	69.66	71.29	97.16	77.06	74.06	73.97	74.68
102.446	102.446	97.68	77.57	74.63	74.22	75	95.28	75.17	69.55	69.68	71.22	97.16	77.05	74.51	74.06	74.9
102.539	102.539	97.68	77.57	74.26	74.19	74.94	95.28	75.17	69.2	69.61	71.11	97.16	77.05	74.14	74.03	74.84
102.632	102.632	97.68	77.57	74.21	74.2	74.9	95.28	75.17	69.28	69.6	71.03	97.16	77.05	74.09	74.05	74.8
102.725	102.725	97.68	77.56	74.02	74.17	74.85	95.28	75.16	69.37	69.59	70.95	97.16	77.05	73.9	74.03	74.75
102.818	102.818	97.68	77.56	74.28	74.19	74.82	95.28	75.16	69.56	69.59	70.88	97.17	77.05	74.16	74.05	74.72
102.911	102.911	97.68	77.56	73.51	74.08	74.72	95.28	75.16	69.03	69.51	70.77	97.17	77.04	73.39	73.94	74.62
103.004	103.004	97.69	77.56	74.75	74.22	75.37	95.28	75.16	69.95	69.61	70.75	97.17	77.04	74.64	74.07	75.27
103.097	103.097	97.69	77.56	73.98	74.14	75.27	95.29	75.15	69.31	69.53	70.65	97.17	77.04	73.87	74	75.17
103.189	103.189	97.69	77.55	73.98	74.12	75.2	95.29	75.15	69.63	69.56	70.61	97.17	77.04	73.86	73.98	75.1
103.282	103.282	97.69	77.55	74.66	74.23	75.21	95.29	75.15	69.95	69.62	70.59	97.18	77.04	74.55	74.09	75.1
103.375	103.375	97.69	77.55	74.71	74.27	75.18	95.29	75.15	69.7	69.6	70.52	97.18	77.03	74.59	74.13	75.06
103.468	103.468	97.7	77.55	75.11	74.39	75.51	95.29	75.14	69.94	69.66	70.51	97.18	77.03	74.99	74.26	75.39
103.561	103.561	97.7	77.55	74.49	74.36	75.43	95.29	75.14	69.76	69.67	70.46	97.18	77.03	74.38	74.23	75.32
103.654	103.654	97.7	77.54	73.85	74.26	75.32	95.29	75.14	69.29	69.59	70.38	97.19	77.03	73.73	74.13	75.2
103.747	103.747	97.7	77.54	73.74	74.21	75.24	95.29	75.13	69.12	69.54	70.3	97.19	77.03	73.61	74.08	75.12
103.84	103.84	97.7	77.54	73.53	74.14	75.14	95.29	75.13	68.79	69.46	70.22	97.19	77.02	73.41	74.01	75.03
103.933	103.933	97.7	77.54	74.16	74.18	75.11	95.3	75.13	69.22	69.46	70.18	97.19	77.02	74.05	74.05	75
104.025	104.025	97.71	77.53	73.54	74.08	75.01	95.3	75.12	69.09	69.42	70.11	97.19	77.02	73.42	73.96	74.89
104.118	104.118	97.71	77.53	73.42	74.02	74.92	95.3	75.12	69	69.38	70.05	97.19	77.02	73.3	73.89	74.8
104.211	104.211	97.71	77.53	74.18	74.09	74.91	95.3	75.12	69.4	69.42	70.03	97.2	77.02	74.06	73.97	74.8
104.304	104.304	97.71	77.53	74.15	74.1	74.88	95.3	75.12	69.3	69.41	69.99	97.2	77.01	74.03	73.98	74.76
104.397	104.397	97.71	77.53	73.9	74.08	74.82	95.3	75.11	69.03	69.36	69.94	97.2	77.01	73.78	73.96	74.7
104.49	104.49	97.71	77.52	74.14	74.11	74.79	95.3	75.11	69.25	69.37	69.91	97.2	77.01	74.02	73.98	74.68
104.583	104.583	97.72	77.52	73.96	74.06	74.73	95.3	75.11	69.23	69.35	69.86	97.2	77.01	73.84	73.94	74.61
104.676	104.676	97.72	77.52	73.25	73.96	74.64	95.3	75.1	68.85	69.29	69.8	97.2	77.01	73.13	73.84	74.52
104.768	104.768	97.72	77.52	72.68	73.83	74.52	95.3	75.1	68.47	69.2	69.72	97.21	77	72.56	73.71	74.4
104.861	104.861	97.72	77.51	72.63	73.74	74.43	95.3	75.1	68.43	69.14	69.65	97.21	77	72.5	73.61	74.31
104.954	104.954	97.72	77.51	74	73.82	74.6	95.31	75.1	69.2	69.18	69.65	97.21	77	73.88	73.7	74.49
105.047	105.047	97.72	77.51	74.13	73.86	74.58	95.31	75.09	69.16	69.18	69.62	97.21	77	74	73.74	74.47
105.14	105.14	97.73	77.51	74.51	73.94	74.71	95.31	75.09	69.43	69.22	69.62	97.21	77	74.39	73.82	74.62
105.233	105.233	97.73	77.51	73.92	73.9	74.64	95.31	75.09	69.11	69.19	69.58	97.22	76.99	73.8	73.77	74.55
105.326	105.326	97.73	77.5	73.88	73.88	74.59	95.31	75.08	69.23	69.2	69.56	97.22	76.99	73.74	73.76	74.5
105.419	105.419	97.73	77.5	73.04	73.78	74.49	95.31	75.08	68.75	69.15	69.51	97.22	76.99	72.92	73.66	74.4
105.511	105.511	97.73	77.5	73.03	73.71	74.41	95.31	75.08	68.86	69.13	69.47	97.22	76.99	72.91	73.59	74.32
105.604	105.604	97.73	77.5	72.57	73.59	74.31	95.31	75.08	68.68	69.07	69.42	97.22	76.98	72.45	73.47	74.21
105.697	105.697	97.73	77.49	73.92	73.69	74.57	95.31	75.07	69.16	69.1	69.42	97.22	76.98	73.81	73.57	74.45
105.79	105.79	97.74	77.49	74.75	73.9	75.17	95.31	75.07	69.65	69.21	69.85	97.23	76.98	74.64	73.78	75.3
105.883	105.883	97.74	77.49	74.69	73.99	75.15	95.32	75.07	69.74	69.29	70	97.23	76.98	74.58	73.87	75.27
105.976	105.976	97.74	77.49	73.85	73.89	75.04	95.32	75.06	69.31	69.25	69.93	97.23	76.98	73.74	73.77	75.15
106.069	106.069	97.74	77.49	73.83	73.88	74.97	95.32	75.06	69.48	69.27	69.91	97.23	76.98	73.72	73.76	75.07
106.162	106.162	97.74	77.48	73.45	73.83	74.89	95.32	75.06	69.19	69.25	69.86	97.23	76.97	73.33	73.71	74.98
106.255	106.255	97.74	77.48	73.43	73.81	74.82	95.32	75.06	69.02	69.23	69.82	97.23	76.97	73.32	73.69	74.9
106.347	106.347	97.75	77.48	73.68	73.79	74.75	95.32	75.05	69.02	69.2	69.76	97.24	76.97	73.56	73.67	74.83
106.44	106.44	97.75	77.48	74.6	73.91	75.01	95.32	75.05	69.9	69.3	70.25	97.24	76.97	74.45	73.79	74.86
106.533	106.533	97.75	77.48	75.68	74.21	76.44	95.32	75.05	71.38	69.68	72.36	97.24	76.97	75.53	74.08	76.27
106.626	106.626	97.75	77.47	74.94	74.2	76.33	95.33	75.05	70.77	69.72	72.26	97.24	76.97	74.74	74.06	76.16
106.719	106.719	97.75	77.47	74.64	74.21	76.23	95.33	75.04	70.38	69.74	72.15	97.25	76.96	74.42	74.06	76.06
106.812	106.812	97.76	77.47	74.68	74.26	76.16	95.33	75.04	70.35	69.79	72.05	97.25	76.96	74.48	74.11	75.98
106.905	106.905	97.76	77.47	75.57	74.49	76.41	95.33	75.04	71.18	70.05	72.1	97.25	76.96	75.36	74.33	76.17
106.998	106.998	97.76	77.47	75.59	74.64	76.38	95.33	75.04	71.97	70.4	73.06	97.25	76.96	75	74.38	76.1
107.09	107.09	97.76	77.47	75.04	74.61	76.28	95.33	75.04	70.87	70.34	72.91	97.26	76.96	74.65	74.36	76.01
107.183	107.183	97.77	77.46	74.34	74.53	76.16	95.33	75.03	70.04	70.24	72.76	97.26	76.96	74.07	74.28	75.89
107.276	107.276	97.77	77.46	74.05	74.48	76.05	95.34	75.03	69.79	70.19	72.62	97.26	76.95	73.86	74.25	75.79
107.369	107.369	97.77	77.46	73.6	74.37	75.92	95.34	75.03	69.44	70.11	72.47	97.26	76.95	73.44	74.15	75.67
107.462	107.462	97.77	77.46	73.7	74.33	75.82	95.34	75.02	69.34	70.04	72.34	97.26	76.95	73.56	74.11	75.57
107.555	107.555	97.77	77.46	73.93	74.33	75.75	95.34	75.02	69.38	70.01	72.22	97.26	76.95	73.8	74.13	75.5
107.648	107.648	97.77	77.45	73.26	74.19	75.6	95.34	75.02	68.91	69.88	72.06	97.27	76.95	73.13	73.99	75.36
107.741	107.741	97.78	77.45	73.89	74.22	75.54	95.34	75.02	69.57	69.9	71.96	97.27	76.94	73.77	74.02	75.31
107.833	107.833	97.78	77.45	73.24	74.09	75.41	95.34	75.01	69.11	69.8	71.82	97.27	76.94	73.12	73.9	75.18
107.926	107.926	97.78	77.45	74.62	74.24	75.5	95.34	75.01	69.86	69.85	71.74	97.27	76.94	74.5	74.05	75.38
108.019	108.019	97.78	77.45	73.87	74.14	75.38	95.34	75.01	69.33	69.77	71.61	97.27	76.94	73.76	73.97	75.27
108.112	108.112	97.78	77.44	72.71	73.96	75.22	95.34	75.01	68.57	69.63	71.46	97.27	76.94	72.58	73.79	75.11
108.205	108.205	97.78	77.44	73.49	73.96	75.16	95.34	75	68.98	69.6	71.35	97.28	76.93	73.37	73.79	75.04
108.298	108.298	97.78	77.44	74.07	74.01	75.12	95.35	75	69.28	69.59	71.26	97.28	76.93	73.94	73.84	75
108.391	108.391	97.79	77.44	74.06	74.03	75.07	95.35	75	69.3	69.57	71.17	97.28	76.93	73.95	73.87	74.95
108.484	108.484	97.79	77.43	73.23	73.9	74.95	95.35	74.99	68.92	69.5	71.06	97.28	76.93	73.11	73.75	74.83
108.577	108.577	97.79	77.43	73.58	73.92	74.9	95.35	74.99	69.09	69.48	70.97	97.28	76.93	73.47	73.76	74.78
108.669	108.669	97.79	77.43	73.45	73.86	74.81	95.35	74.99	69.12	69.45	70.87	97.28	76.92	73.33	73.71	74.7
108.762	108.762	97.79	77.43	73.55	73.84	74.75	95.35	74.99	69.09	69.42	70.79	97.29	76.92	73.43	73.69	74.64
108.855	108.855	97.79	77.43	73.33	73.79	74.68	95.35	74.98	68.9	69.36	70.69	97.29	76.92	73.21	73.65	74.56
108.948	108.948	97.8	77.42	74.14	73.87	74.67	95.35	74.98	69.28	69.38	70.63	97.29	76.92	74.02	73.72	74.55
109.041	109.041	97.8	77.42	73.49	73.78	74.58	95.35	74.98	68.86	69.3	70.52	97.29	76.92	73.38	73.64	74.46
109.134	109.134	97.8	77.42	73.54	73.77	74.53	95.35	74.97	69.05	69.29	70.45	97.29	76.91	73.42	73.63	74.41
109.227	109.227	97.8	77.42	74.14	73.83	74.52	95.36	74.97	69.46	69.33	70.41	97.29	76.91	74.02	73.7	74.4
109.32	109.32	97.8	77.41	73.6	73.76	74.44	95.36	74.97	69.02	69.27	70.32	97.3	76.91	73.48	73.63	74.33
109.412	109.412	97.8	77.41	74.45	73.9	75.06	95.36	74.97	69.57	69.33	70.3	97.3	76.91	74.34	73.76	74.94
109.505	109.505	97.81	77.41	74.12	73.86	74.98	95.36	74.96	69.44	69.31	70.24	97.3	76.91	74	73.73	74.86
109.598	109.598	97.81	77.41	73.66	73.81	74.9	95.36	74.96	68.97	69.26	70.15	97.3	76.9	73.54	73.68	74.78
109.691	109.691	97.81	77.41	73.95	73.85	74.86	95.36	74.96	69.26	69.28	70.12	97.3	76.9	73.83	73.72	74.74
109.784	109.784	97.81	77.4	73.67	73.84	74.8	95.36	74.96	69.11	69.27	70.06	97.31	76.9	73.55	73.71	74.68
109.877	109.877	97.81	77.4	73.15	73.74	74.69	95.36	74.95	68.88	69.22	69.99	97.31	76.9	73.03	73.61	74.57
109.97	109.97	97.81	77.4	73.37	73.73	74.63	95.36	74.95	69.14	69.24	69.96	97.31	76.9	73.25	73.6	74.51
110.063	110.063	97.81	77.4	73.98	73.8	74.62	95.36	74.95	69.5	69.29	69.95	97.31	76.89	73.86	73.67	74.5
110.155	110.155	97.82	77.4	73.14	73.69	74.52	95.37	74.95	68.74	69.19	69.86	97.31	76.89	73.02	73.56	74.4
110.248	110.248	97.82	77.39	72.81	73.59	74.42	95.37	74.94	68.7	69.14	69.79	97.31	76.89	72.68	73.47	74.3
110.341	110.341	97.82	77.39	73.66	73.67	74.44	95.37	74.94	69.34	69.22	69.97	97.32	76.89	73.54	73.55	74.33
110.434	110.434	97.82	77.39	73.34	73.62	74.37	95.37	74.94	69.06	69.18	69.9	97.32	76.89	73.22	73.49	74.25
110.527	110.527	97.82	77.39	73.02	73.54	74.28	95.37	74.93	68.79	69.12	69.83	97.32	76.88	72.9	73.41	74.16
110.62	110.62	97.82	77.38	73.44	73.54	74.24	95.37	74.93	68.94	69.1	69.78	97.32	76.88	73.31	73.41	74.12
110.713	110.713	97.82	77.38	73.22	73.52	74.19	95.37	74.93	68.71	69.07	69.73	97.32	76.88	73.09	73.4	74.08
110.806	110.806	97.83	77.38	73.87	73.61	74.45	95.37	74.93	69.27	69.14	69.76	97.32	76.88	73.75	73.49	74.35
110.899	110.899	97.83	77.38	74.18	73.71	74.52	95.37	74.92	69.54	69.21	69.97	97.33	76.88	74.07	73.59	74.56
110.991	110.991	97.83	77.38	73.99	73.73	74.48	95.37	74.92	69.43	69.23	69.94	97.33	76.87	73.87	73.61	74.52
111.084	111.084	97.83	77.37	73.92	73.75	74.45	95.38	74.92	69.57	69.28	69.93	97.33	76.87	73.81	73.63	74.48
111.177	111.177	97.83	77.37	74.26	73.81	74.45	95.38	74.92	69.63	69.31	69.91	97.33	76.87	74.14	73.69	74.47
111.27	111.27	97.84	77.37	74.71	73.93	75.04	95.38	74.91	69.76	69.35	69.9	97.33	76.87	74.6	73.82	74.93
111.363	111.363	97.84	77.37	74.3	73.97	75	95.38	74.91	69.5	69.37	69.88	97.34	76.87	74.19	73.85	74.89
111.456	111.456	97.84	77.37	73.81	73.92	74.92	95.38	74.91	69.21	69.34	69.83	97.34	76.87	73.69	73.81	74.81
111.549	111.549	97.84	77.37	73.93	73.93	74.87	95.38	74.91	69.22	69.33	69.8	97.34	76.86	73.81	73.81	74.76
111.642	111.642	97.84	77.36	73.47	73.85	74.78	95.38	74.9	69.05	69.29	69.75	97.34	76.86	73.35	73.74	74.66
111.734	111.734	97.84	77.36	73.09	73.75	74.67	95.38	74.9	68.83	69.23	69.68	97.34	76.86	72.96	73.63	74.56
111.827	111.827	97.84	77.36	72.98	73.69	74.59	95.38	74.9	68.89	69.21	69.65	97.34	76.86	72.86	73.57	74.47
111.92	111.92	97.85	77.36	72.8	73.62	74.5	95.38	74.89	68.89	69.19	69.61	97.34	76.86	72.67	73.5	74.38
112.013	112.013	97.85	77.35	72.72	73.53	74.4	95.38	74.89	68.64	69.12	69.54	97.35	76.85	72.59	73.41	74.29
112.106	112.106	97.85	77.35	73.01	73.51	74.34	95.39	74.89	68.81	69.11	69.51	97.35	76.85	72.89	73.39	74.23
112.199	112.199	97.85	77.35	73.14	73.49	74.29	95.39	74.89	69.05	69.12	69.5	97.35	76.85	73.02	73.37	74.17
112.292	112.292	97.85	77.35	72.85	73.41	74.2	95.39	74.88	68.64	69.04	69.43	97.35	76.85	72.72	73.29	74.08
112.385	112.385	97.85	77.34	72.68	73.35	74.12	95.39	74.88	68.66	69.02	69.39	97.35	76.84	72.56	73.23	74
112.477	112.477	97.85	77.34	74.36	73.57	75.34	95.39	74.88	69.51	69.13	70.09	97.35	76.84	74.25	73.45	75.25
112.57	112.57	97.86	77.34	75.19	73.83	75.91	95.39	74.88	70.03	69.26	70.47	97.36	76.84	75.08	73.71	75.79
112.663	112.663	97.86	77.34	74.91	73.88	75.82	95.39	74.87	70.07	69.32	70.44	97.36	76.84	74.75	73.75	75.71
112.756	112.756	97.86	77.34	75.94	74.22	76.74	95.39	74.87	71.49	69.71	72.45	97.36	76.84	75.73	74.08	76.54
112.849	112.849	97.86	77.34	75.16	74.26	76.64	95.4	74.87	70.84	69.78	72.36	97.36	76.84	74.94	74.11	76.44
112.942	112.942	97.86	77.34	74.06	74.15	76.49	95.4	74.87	69.95	69.72	72.22	97.37	76.84	73.84	73.99	76.28
113.035	113.035	97.87	77.33	74.3	74.18	76.39	95.4	74.87	70.44	69.82	72.14	97.37	76.83	74.01	74.01	76.18
113.128	113.128	97.87	77.33	74.73	74.28	76.33	95.4	74.86	71.15	70.07	72.13	97.37	76.83	74.32	74.08	76.1
113.22	113.22	97.87	77.33	73.99	74.2	76.19	95.4	74.86	70.12	69.98	71.99	97.37	76.83	73.71	73.99	75.97
113.313	113.313	97.87	77.33	74	74.19	76.09	95.4	74.86	69.62	69.91	71.87	97.37	76.83	73.81	74	75.87
113.406	113.406	97.87	77.33	74.87	74.31	76.05	95.4	74.86	70.05	69.95	71.79	97.38	76.83	74.73	74.13	75.84
113.499	113.499	97.88	77.33	74.93	74.36	75.99	95.4	74.85	69.88	69.93	71.69	97.38	76.83	74.81	74.18	75.78
113.592	113.592	97.88	77.32	74.51	74.35	75.9	95.4	74.85	69.64	69.89	71.58	97.38	76.83	74.39	74.18	75.7
113.685	113.685	97.88	77.32	74.78	74.4	75.85	95.41	74.85	69.85	69.9	71.5	97.38	76.82	74.67	74.24	75.65
113.778	113.778	97.88	77.32	74.98	74.49	75.81	95.41	74.85	69.88	69.91	71.43	97.38	76.82	74.87	74.33	75.62
113.871	113.871	97.88	77.32	74.23	74.41	75.71	95.41	74.84	69.47	69.84	71.31	97.39	76.82	74.11	74.25	75.51
113.964	113.964	97.89	77.32	74.1	74.38	75.62	95.41	74.84	69.52	69.81	71.23	97.39	76.82	73.98	74.23	75.44
114.056	114.056	97.89	77.32	73.28	74.24	75.49	95.41	74.84	69.02	69.72	71.11	97.39	76.82	73.15	74.09	75.3
114.149	114.149	97.89	77.31	73.02	74.11	75.35	95.41	74.84	69.09	69.65	71	97.39	76.81	72.9	73.96	75.17
114.242	114.242	97.89	77.31	74.85	74.33	76.09	95.41	74.83	70.01	69.77	70.99	97.39	76.81	74.74	74.18	75.98
114.335	114.335	97.89	77.31	74.36	74.29	75.99	95.41	74.83	69.63	69.72	70.9	97.39	76.81	74.24	74.15	75.88
114.428	114.428	97.89	77.31	74.35	74.31	75.91	95.41	74.83	69.66	69.72	70.84	97.4	76.81	74.24	74.16	75.8
114.521	114.521	97.9	77.31	73.76	74.22	75.79	95.42	74.83	69.34	69.67	70.75	97.4	76.81	73.64	74.08	75.68
114.614	114.614	97.9	77.3	73.82	74.2	75.7	95.42	74.82	69.25	69.63	70.67	97.4	76.81	73.7	74.06	75.59
114.707	114.707	97.9	77.3	73.75	74.16	75.6	95.42	74.82	69.17	69.59	70.59	97.4	76.81	73.64	74.03	75.49
114.799	114.799	97.9	77.3	74.17	74.18	75.54	95.42	74.82	69.47	69.59	70.54	97.4	76.8	74.06	74.05	75.43
114.892	114.892	97.9	77.3	74.34	74.21	75.48	95.42	74.82	69.62	69.6	70.49	97.41	76.8	74.23	74.08	75.37
114.985	114.985	97.9	77.3	74.41	74.23	75.42	95.42	74.81	69.47	69.57	70.43	97.41	76.8	74.3	74.1	75.31
115.078	115.078	97.91	77.3	74.02	74.18	75.34	95.42	74.81	69.27	69.53	70.36	97.41	76.8	73.9	74.05	75.23
115.171	115.171	97.91	77.29	74.48	74.25	75.31	95.42	74.81	69.8	69.6	70.36	97.41	76.8	74.37	74.12	75.2
115.264	115.264	97.91	77.29	74.54	74.28	75.27	95.42	74.81	69.59	69.59	70.3	97.41	76.8	74.43	74.15	75.16
115.357	115.357	97.91	77.29	74.37	74.26	75.2	95.42	74.8	69.7	69.59	70.27	97.42	76.79	74.25	74.13	75.09
115.45	115.45	97.91	77.29	74.63	74.32	75.19	95.43	74.8	69.93	69.64	70.26	97.42	76.79	74.52	74.19	75.07
115.542	115.542	97.91	77.29	74.2	74.25	75.1	95.43	74.8	69.67	69.6	70.2	97.42	76.79	74.09	74.13	74.99
115.635	115.635	97.92	77.29	74.57	74.28	75.07	95.43	74.8	69.91	69.63	70.18	97.42	76.79	74.46	74.16	74.96
115.728	115.728	97.92	77.28	74.22	74.24	75.01	95.43	74.79	69.77	69.63	70.15	97.42	76.79	74.1	74.12	74.89
115.821	115.821	97.92	77.28	73.68	74.15	74.91	95.43	74.79	69.32	69.56	70.08	97.42	76.79	73.56	74.03	74.8
115.914	115.914	97.92	77.28	73.99	74.18	74.89	95.43	74.79	69.43	69.57	70.06	97.43	76.78	73.87	74.06	74.78
116.007	116.007	97.92	77.28	75.27	74.36	75.87	95.43	74.79	70.11	69.65	70.39	97.43	76.78	75.16	74.24	75.76
116.1	116.1	97.92	77.28	74.69	74.31	75.77	95.43	74.78	69.62	69.59	70.32	97.43	76.78	74.57	74.19	75.66
116.193	116.193	97.93	77.27	74.66	74.32	75.7	95.43	74.78	69.58	69.57	70.27	97.43	76.78	74.53	74.2	75.59
116.286	116.286	97.93	77.27	74.5	74.33	75.63	95.43	74.78	69.62	69.59	70.24	97.43	76.78	74.38	74.21	75.52
116.378	116.378	97.93	77.27	74.26	74.3	75.55	95.44	74.78	69.44	69.56	70.18	97.44	76.78	74.14	74.18	75.43
116.471	116.471	97.93	77.27	74.22	74.28	75.47	95.44	74.77	69.59	69.57	70.15	97.44	76.78	74.09	74.16	75.36
116.564	116.564	97.93	77.27	74.11	74.25	75.39	95.44	74.77	69.69	69.59	70.13	97.44	76.77	73.99	74.13	75.28
116.657	116.657	97.93	77.27	73.67	74.16	75.29	95.44	74.77	69.4	69.54	70.07	97.44	76.77	73.55	74.04	75.17
116.75	116.75	97.94	77.26	71.81	73.88	75.08	95.44	74.77	67.7	69.3	69.9	97.44	76.77	71.68	73.76	74.97
116.843	116.843	97.94	77.26	69.14	73.52	74.83	95.44	74.76	65.25	68.96	69.66	97.44	76.77	69.01	73.4	74.72
116.936	116.936	97.94	77.26	66.51	73.14	74.57	95.44	74.76	62.51	68.57	69.41	97.44	76.76	66.38	73.02	74.46
117.029	117.029	97.94	77.25	65.32	72.78	74.33	95.44	74.76	60.98	68.21	69.16	97.44	76.76	65.2	72.66	74.21
117.121	117.121	97.94	77.25	65.57	72.46	74.09	95.44	74.75	61.11	67.89	68.93	97.44	76.76	65.44	72.33	73.98
117.214	117.214	97.94	77.25	68.11	72.26	73.92	95.44	74.75	63.68	67.7	68.78	97.44	76.75	67.99	72.14	73.81
117.307	117.307	97.94	77.24	70.85	72.26	73.84	95.44	74.75	66.12	67.68	68.71	97.44	76.75	70.72	72.14	73.72
117.4	117.4	97.94	77.24	73.04	72.49	74.32	95.44	74.74	68.06	67.84	69.17	97.45	76.75	72.92	72.37	74.21
117.493	117.493	97.94	77.24	73.86	72.71	74.54	95.44	74.74	68.85	68.01	69.48	97.45	76.75	73.74	72.59	74.43
117.586	117.586	97.94	77.24	73.51	72.76	74.47	95.44	74.74	68.85	68.09	69.44	97.45	76.75	73.39	72.64	74.36
117.679	117.679	97.94	77.24	73.1	72.77	74.39	95.44	74.74	68.69	68.15	69.4	97.45	76.74	72.98	72.65	74.28
117.772	117.772	97.95	77.24	74.18	73.04	75.11	95.45	74.74	69.54	68.38	70.31	97.45	76.74	74.07	72.92	74.83
117.864	117.864	97.95	77.23	74.05	73.1	75.03	95.45	74.73	69.38	68.45	70.24	97.45	76.74	73.93	72.98	74.76
117.957	117.957	97.95	77.23	73.77	73.16	74.96	95.45	74.73	69.26	68.53	70.19	97.46	76.74	73.65	73.04	74.7
118.05	118.05	97.95	77.23	73.62	73.19	74.89	95.45	74.73	69.36	68.62	70.15	97.46	76.74	73.5	73.07	74.63
118.143	118.143	97.95	77.23	73.71	73.24	74.83	95.45	74.73	69.41	68.71	70.11	97.46	76.74	73.59	73.13	74.58
118.236	118.236	97.95	77.23	74.93	73.51	75.58	95.45	74.72	69.94	68.87	70.24	97.46	76.73	74.82	73.39	75.47
118.329	118.329	97.96	77.23	75.23	73.72	75.58	95.45	74.72	70.18	69.01	70.28	97.46	76.73	75.11	73.6	75.46
118.422	118.422	97.96	77.22	74.54	73.73	75.49	95.45	74.72	69.76	69.05	70.23	97.47	76.73	74.42	73.62	75.38
118.515	118.515	97.96	77.22	74.27	73.74	75.41	95.45	74.72	69.68	69.08	70.19	97.47	76.73	74.15	73.63	75.29
118.608	118.608	97.96	77.22	74.44	73.81	75.35	95.46	74.71	69.67	69.12	70.15	97.47	76.73	74.33	73.69	75.24
118.7	118.7	97.96	77.22	75.09	74	75.61	95.46	74.71	69.93	69.22	70.15	97.47	76.73	74.98	73.89	75.48
118.793	118.793	97.96	77.22	74.01	73.9	75.48	95.46	74.71	69.02	69.12	70.04	97.47	76.73	73.89	73.78	75.35
118.886	118.886	97.97	77.21	73.94	73.89	75.4	95.46	74.71	69.12	69.13	70	97.48	76.72	73.82	73.77	75.27
118.979	118.979	97.97	77.21	73.66	73.83	75.29	95.46	74.7	68.96	69.08	69.92	97.48	76.72	73.54	73.72	75.16
119.072	119.072	97.97	77.21	74.27	73.9	75.25	95.46	74.7	69.42	69.14	69.91	97.48	76.72	74.15	73.78	75.12
119.165	119.165	97.97	77.21	74.94	74.1	75.64	95.46	74.7	70.07	69.31	70.65	97.48	76.72	74.83	73.99	75.44
119.258	119.258	97.97	77.21	74.73	74.13	75.57	95.46	74.7	69.91	69.35	70.6	97.48	76.72	74.62	74.01	75.37
119.351	119.351	97.98	77.21	74.27	74.11	75.49	95.46	74.69	69.55	69.35	70.53	97.49	76.72	74.16	74	75.29
119.443	119.443	97.98	77.2	73.46	73.99	75.36	95.46	74.69	69.02	69.28	70.43	97.49	76.72	73.34	73.88	75.17
119.536	119.536	97.98	77.2	73.04	73.88	75.23	95.46	74.69	68.62	69.19	70.32	97.49	76.71	72.92	73.76	75.04
119.629	119.629	97.98	77.2	73.58	73.91	75.18	95.47	74.69	68.82	69.18	70.26	97.49	76.71	73.46	73.79	74.99
119.722	119.722	97.98	77.2	74.42	74.01	75.16	95.47	74.69	69.52	69.25	70.24	97.49	76.71	74.3	73.89	74.98
119.815	119.815	97.98	77.2	74.34	74.04	75.12	95.47	74.68	69.46	69.27	70.19	97.49	76.71	74.23	73.92	74.94
119.908	119.908	97.98	77.2	74.12	74.02	75.05	95.47	74.68	69.36	69.27	70.14	97.5	76.71	74	73.91	74.87
120.001	120.001	97.99	77.19	73.98	74.02	74.99	95.47	74.68	69.11	69.23	70.08	97.5	76.71	73.87	73.9	74.82
120.094	120.094	97.99	77.19	73.63	73.95	74.9	95.47	74.68	68.99	69.2	70.01	97.5	76.7	73.51	73.83	74.73
120.186	120.186	97.99	77.19	73.76	73.95	74.85	95.47	74.67	69.29	69.24	69.99	97.5	76.7	73.64	73.83	74.68
120.279	120.279	97.99	77.19	73.25	73.86	74.76	95.47	74.67	68.87	69.18	69.92	97.5	76.7	73.13	73.75	74.59
120.372	120.372	97.99	77.19	72.96	73.78	74.66	95.47	74.67	68.61	69.12	69.84	97.5	76.7	72.84	73.66	74.49
120.465	120.465	97.99	77.18	73.09	73.72	74.58	95.47	74.67	68.47	69.04	69.75	97.5	76.7	72.96	73.6	74.41
120.558	120.558	97.99	77.18	73.68	73.76	74.55	95.47	74.66	69.04	69.08	69.74	97.51	76.69	73.55	73.64	74.39
120.651	120.651	98	77.18	73.8	73.76	74.51	95.48	74.66	69.34	69.12	69.72	97.51	76.69	73.67	73.64	74.35
120.744	120.744	98	77.18	75.48	74.11	76.53	95.48	74.66	70.6	69.4	71.36	97.51	76.69	75.37	73.99	76.35
120.837	120.837	98	77.18	74.26	74.02	76.38	95.48	74.66	69.79	69.37	71.26	97.51	76.69	74.15	73.91	76.21
120.93	120.93	98	77.18	74.2	74.05	76.28	95.48	74.65	69.42	69.35	71.15	97.51	76.69	74.08	73.93	76.11
121.022	121.022	98	77.17	72.8	73.86	76.1	95.48	74.65	68.23	69.18	70.99	97.52	76.69	72.68	73.74	75.93
121.115	121.115	98.07	77.23	87.14	80.39	89.88	95.51	74.68	82.25	75.42	84.88	97.58	76.75	86.85	80.14	89.34
121.208	121.208	98.07	77.24	84.75	80.38	89.64	95.52	74.69	80.48	75.74	84.67	97.59	76.75	84.4	80.1	89.1
121.301	121.301	98.07	77.24	81.93	80.08	89.38	95.52	74.69	77.71	75.47	84.41	97.59	76.75	81.6	79.8	88.84
121.394	121.394	98.07	77.23	79.26	79.76	89.12	95.52	74.68	74.94	75.14	84.15	97.59	76.75	78.95	79.48	88.58
121.487	121.487	98.08	77.23	77.08	79.44	88.86	95.53	74.68	72.59	74.81	83.89	97.59	76.75	76.81	79.17	88.32
121.58	121.58	98.08	77.23	75.72	79.16	88.6	95.53	74.68	70.82	74.5	83.63	97.59	76.74	75.5	78.89	88.06
121.673	121.673	98.08	77.23	74.48	78.85	88.34	95.53	74.67	69.45	74.18	83.37	97.59	76.74	74.3	78.58	87.8
121.765	121.765	98.08	77.22	73.89	78.56	88.08	95.53	74.67	68.47	73.87	83.1	97.6	76.74	73.75	78.3	87.54
121.858	121.858	98.08	77.22	73.77	78.29	87.82	95.53	74.67	67.92	73.55	82.84	97.6	76.74	73.63	78.03	87.28
121.951	121.951	98.08	77.22	75.8	78.19	87.57	95.53	74.67	69.81	73.37	82.59	97.6	76.74	75.68	77.94	87.04
122.044	122.044	98.09	77.22	75.98	78.02	87.32	95.53	74.67	72.01	73.33	82.35	97.6	76.74	75.49	77.75	86.79
122.137	122.137	98.09	77.22	74.81	77.76	87.06	95.53	74.66	70.57	73.06	82.09	97.6	76.74	74.39	77.48	86.53
122.23	122.23	98.09	77.22	76.01	77.7	86.82	95.53	74.66	72.87	73.19	81.87	97.61	76.74	75.12	77.36	86.28
122.323	122.323	98.1	77.22	77.21	77.7	86.59	95.54	74.67	75.6	73.64	81.68	97.61	76.74	76.13	77.3	86.05
122.416	122.416	98.1	77.23	79.45	78.25	86.41	95.56	74.68	79.09	75.4	82.03	97.62	76.74	78.5	77.74	85.86
122.508	122.508	98.11	77.23	79.74	78.58	86.22	95.58	74.69	79.95	76.52	82.01	97.63	76.75	79.26	78.13	85.68
122.601	122.601	98.11	77.23	77.36	78.28	85.96	95.58	74.69	76.97	76.16	81.75	97.63	76.74	76.94	77.84	85.42
122.694	122.694	98.12	77.23	75.56	78	85.71	95.58	74.69	74.24	75.82	81.49	97.63	76.74	75.23	77.57	85.17
122.787	122.787	98.12	77.23	76.03	77.92	85.47	95.58	74.69	73.51	75.65	81.27	97.63	76.74	75.79	77.51	84.94
122.88	122.88	98.12	77.22	74.64	77.64	85.22	95.58	74.68	71.44	75.31	81.01	97.64	76.74	74.44	77.24	84.69
122.973	122.973	98.13	77.23	78.76	77.87	85.03	95.59	74.69	77.27	75.7	80.89	97.64	76.74	76.95	77.27	84.47
123.066	123.066	98.22	77.32	88.06	82.73	89.02	95.72	74.82	87.08	81.45	88.39	97.69	76.79	85.22	80.63	86.66
123.159	123.159	98.22	77.32	85.03	82.39	88.76	95.72	74.82	83.99	81.1	88.13	97.69	76.79	82.35	80.32	86.41
123.252	123.252	98.22	77.32	82.22	82.06	88.5	95.73	74.82	81.06	80.75	87.87	97.7	76.79	79.84	80.03	86.15
123.344	123.344	98.22	77.31	79.71	81.72	88.24	95.73	74.82	78.49	80.41	87.61	97.7	76.79	77.75	79.73	85.9
123.437	123.437	98.23	77.31	77.28	81.37	87.98	95.73	74.81	75.86	80.04	87.34	97.7	76.79	75.65	79.4	85.64
123.53	123.53	98.23	77.31	75.33	81.01	87.72	95.73	74.81	73.52	79.67	87.08	97.7	76.78	73.95	79.06	85.39
123.623	123.623	98.23	77.31	73.41	80.64	87.45	95.73	74.81	71.43	79.29	86.81	97.7	76.78	72.39	78.71	85.13
123.716	123.716	98.23	77.3	72.48	80.29	87.19	95.73	74.81	69.82	78.92	86.55	97.7	76.78	71.82	78.38	84.87
123.809	123.809	98.23	77.3	72.15	79.95	86.93	95.73	74.8	68.85	78.55	86.28	97.7	76.78	71.75	78.07	84.61
123.902	123.902	98.23	77.3	72.12	79.61	86.67	95.73	74.8	68.52	78.18	86.02	97.7	76.77	71.85	77.76	84.36
123.995	123.995	98.23	77.3	71.65	79.27	86.41	95.73	74.8	68.11	77.81	85.75	97.71	76.77	71.42	77.45	84.1
124.087	124.087	98.23	77.29	72.43	78.96	86.15	95.73	74.8	69	77.48	85.49	97.71	76.77	72.26	77.19	83.85
124.18	124.18	98.23	77.29	73.43	78.7	85.9	95.74	74.79	69.62	77.15	85.23	97.71	76.77	73.29	76.99	83.61
124.273	124.273	98.23	77.29	72.6	78.38	85.64	95.74	74.79	69.16	76.81	84.96	97.71	76.77	72.45	76.7	83.36
124.366	124.366	98.24	77.29	71.9	78.05	85.38	95.74	74.79	68.58	76.46	84.7	97.71	76.76	71.73	76.41	83.11

## Sheet: Vibration
\Experiment code: JBG029
\Experiment summary: Vibration was recorded with VibSensor v2.1.1 (Now Instruments and Software) as high-pass filtered accelerometer data (99.3 Hz) on 3 different movement axes (x, y, z).
\Data type and description: High pass filter accelerometer data (m/s^2)
\Authors: J Bertran-Gonzalez (ORCID: 0000-0002-3794-1782)
VibSensor v2.1.1, Now instruments and Software
Start: 7 Aug 2017 (01:30:49.152 pm)
Length: 2 min 10 sec
Points: 12,932	Gaps: none
Data rate: 99.3 Hz	Units: m/s^2
Peak raw: X (2.43) Y (1.08) Z (12.44)
ISD: X (0.058) Y (0.037) Z (0.065)
Resonances:	X: 22 Hz (0.00023), 5.7 Hz (0.00022)
	Y: 29 Hz (0.00015), 12 Hz (0.00011)
	Z: 7.7 Hz (0.00027), 9 Hz (0.00027)
rms vibration: X (0.057) Y (0.037) Z (0.065)
time (sec)	X vibration (m/s^2)	Y vibration (m/s^2)	Z vibration (m/s^2)
0	0.146166	0.0528807	-0.0346449
0.0100706	0.0487266	0.0763818	0.00638289
0.0201412	0.0425809	-0.00753854	0.141466
0.0302118	0.0360544	-0.020246	0.0157454
0.0402824	0.0441158	-0.0560854	0.0377756
0.050353	-0.00357771	-0.0207272	-0.010476
0.0604236	0.0223833	-0.0224321	-0.0426298
0.0704942	0.00244648	-0.0388309	-0.0284732
0.0805648	-0.00303988	0.06089	0.0112264
0.0906354	0.00102616	0.0432713	-0.0653763
0.100706	-0.0209236	-0.0124328	0.0211983
0.110777	-0.0286061	0.0527282	-0.0171965
0.120847	-0.0418273	0.0211034	0.0360529
0.130918	-0.0541021	-0.018425	-0.0473246
0.140988	-0.0338908	-0.0096131	0.0233046
0.151059	0.0226823	0.0243305	-0.00471408
0.16113	0.0367294	-0.0447983	0.0157902
0.1712	0.0795394	0.00428319	-0.0263884
0.181271	0.053685	0.00624615	-0.061029
0.191341	0.0450274	-0.00517224	0.0181609
0.201412	0.0332722	-0.0217322	-0.0844725
0.211483	0.0534689	0.00746944	0.00504787
0.221553	0.0285759	-0.0171002	-0.0382438
0.231624	0.0327356	0.0105769	0.0265578
0.241694	-0.00279278	0.0322884	0.0226189
0.251765	0.0158473	0.0249325	-0.00576434
0.261836	-0.0336583	-0.0219581	0.0245532
0.271906	-0.0234412	0.00395145	-0.00340223
0.281977	-0.0824379	0.00781273	0.00244082
0.292047	-0.0440382	-0.0153792	-0.0276197
0.302118	-0.0584948	-0.0227623	0.0186139
0.312189	-0.02951	-0.0693905	-0.0117359
0.322259	0.00425076	0.0129796	-0.027559
0.33233	0.0607927	0.0355665	-0.0235148
0.3424	0.032099	0.0162839	0.0430754
0.352471	0.0971704	0.0192033	-0.0176378
0.362542	0.0979564	0.00848198	-0.0424011
0.372612	0.0983609	0.0217632	-0.0769448
0.382683	0.0509595	-0.00485667	-0.00540918
0.392753	0.0177792	-0.00738247	-0.0161789
0.402824	-0.047765	-0.0443468	-0.00416696
0.412895	-0.0561041	-0.0137449	0.0123925
0.422965	-0.0344903	0.0155147	0.0440281
0.433036	-0.0257092	-0.0429479	0.0330006
0.443106	-0.0222381	0.019836	0.0191506
0.453177	-0.0260302	-0.0123198	-0.0433439
0.463248	-0.0208043	-0.0276295	0.0203673
0.473318	0.0215004	0.0196831	0.0318633
0.483389	-0.0011055	0.000742427	0.0387821
0.493459	-0.00453108	-0.0161228	0.0122847
0.50353	-0.0342321	-0.00634594	-0.0625369
0.513601	-0.0378253	-0.00990503	-0.0179583
0.523671	-0.0331022	-0.0142879	0.0529726
0.533742	-0.0181556	-0.0166869	0.0336635
0.543812	-0.0479169	-0.000943156	0.0540887
0.553883	-0.0401873	-0.0250704	-0.00290884
0.563954	-0.0495319	-0.023868	-0.0137024
0.574024	-0.0135882	-0.0138917	-0.0309959
0.584095	0.06241	0.0410065	-0.0393474
0.594165	0.0648308	0.0639528	0.0116274
0.604236	0.0501163	0.00509699	0.00127767
0.614307	0.0020313	-0.00502236	0.00919295
0.624377	-0.0088525	0.0278422	0.0141178
0.634448	0.0304349	0.0297773	-0.0149993
0.644518	0.0287987	0.0117996	-0.000506609
0.654589	0.00107039	0.0300004	-0.0103971
0.66466	-0.0191959	0.0276324	-0.0185326
0.67473	0.00811499	0.00477173	0.0465743
0.684801	0.00957801	-0.00118228	0.0265985
0.694871	-0.0378781	0.0201768	-0.0464775
0.704942	-0.0258399	0.0181289	-0.0294807
0.715013	-0.0148846	0.0223064	0.011259
0.725083	0.0154194	0.00582352	0.00428473
0.735154	0.0284661	0.0164096	0.00803766
0.745224	0.00606715	0.0183591	-0.00224723
0.755295	0.00698409	0.00291346	0.00197922
0.765366	0.020139	0.00730418	0.0348466
0.775436	0.0225675	-0.0154963	0.00483291
0.785507	0.0179164	-0.0422337	0.00611517
0.795577	0.00787945	-0.00680686	0.0384493
0.805648	-0.0162562	0.00312247	0.0208569
0.815719	-0.00399916	-0.0168249	0.00382946
0.825789	-0.00689366	-0.0194079	-0.0154255
0.83586	-0.0180427	-0.029544	-0.0185823
0.84593	-0.0321362	-0.0250165	0.0128834
0.856001	-0.0239363	-0.0289729	-0.00016049
0.866072	0.0337941	-0.0370949	-0.0276999
0.876142	0.0307034	0.00339749	-0.0258659
0.886213	-0.000386697	0.0364131	-0.0148001
0.896283	0.0151697	-0.0118395	-0.0571701
0.906354	0.0124312	-0.0251648	-0.0400154
0.916425	-0.0169945	0.00911734	0.0253879
0.926495	-0.0190303	-0.0162623	-0.00515569
0.936566	-0.0170526	-0.0451361	-0.0385218
0.946636	-0.026595	0.0173291	-0.0314518
0.956707	0.00162849	0.00090647	0.0248129
0.966778	0.0512299	-0.026243	0.0105213
0.976848	0.0588547	-0.0244159	0.0254202
0.986919	0.0435002	0.0122317	0.0651607
0.996989	0.0368893	0.0338647	-0.00902034
1.00706	0.0396782	0.0142992	0.0117543
1.01713	0.00796735	0.00222577	0.0103585
1.0272	-0.0130163	0.00628096	-0.00853877
1.03727	0.0500152	-0.00255743	0.0163571
1.04734	0.0231576	-0.0151647	-0.0428987
1.05741	-0.0270456	-0.0124825	-0.0296596
1.06748	-0.0373773	-0.0238079	-0.00441131
1.07755	-0.0298407	-0.0218122	0.0392395
1.08762	-0.0125993	-0.024089	0.0213217
1.0977	-0.0317954	0.0172592	0.0372026
1.10777	0.00549666	0.000166297	-3.17413e-05
1.11784	-0.00655781	0.011821	0.0219385
1.12791	-0.0229913	0.0454483	0.0284979
1.13798	0.0291637	-0.0152692	-0.0077582
1.14805	0.0369923	-0.0211467	0.0162889
1.15812	0.0387481	0.0520162	0.0255814
1.16819	0.0286786	-0.00337595	-0.0528634
1.17826	0.0124906	-0.0213078	-0.0326139
1.18833	-4.50524e-06	0.0157529	-0.0051312
1.1984	-0.0443445	-0.0247314	0.0516032
1.20847	-0.0684968	-0.0294645	-0.0103597
1.21854	-0.00407188	0.0345127	0.0519455
1.22861	-0.0210675	0.00174921	-0.0383974
1.23868	-0.0360183	0.00813971	-0.00680691
1.24875	0.0537367	0.0404243	0.0748025
1.25883	0.0104353	-0.0264884	-0.0765125
1.2689	0.0223708	0.0609565	-0.00652897
1.27897	0.00175946	0.0495399	0.0354096
1.28904	-0.0198284	-0.0238122	-0.0605141
1.29911	0.00144555	-0.0387386	0.0386004
1.30918	-0.00543292	-0.00135793	-0.00174965
1.31925	0.0203728	-0.0778993	0.00502006
1.32932	0.0115868	-0.0101692	-0.0142868
1.33939	0.0309226	-0.0115766	-0.0370568
1.34946	0.0488544	0.0148784	-0.0287136
1.35953	-0.00732592	0.0838443	-0.0443412
1.3696	0.000717629	0.0218898	-0.00618114
1.37967	-0.0154854	0.00302596	-0.0283078
1.38974	-0.0522576	0.0115515	0.0739555
1.39981	-0.0714522	-0.0337407	0.0190693
1.40988	-0.0824533	0.0130232	0.0542562
1.41995	-0.0307721	0.0211365	0.0315518
1.43003	-0.0379903	-0.0172896	-0.0393697
1.4401	-0.000806323	-0.020941	-0.0149693
1.45017	-0.00079348	0.0721481	-0.0558455
1.46024	0.0129208	0.0482939	0.032429
1.47031	0.0194626	0.0383251	-0.0192801
1.48038	0.0169091	0.0287987	0.0478007
1.49045	0.0355031	0.0224918	0.0428299
1.50052	-0.00245309	-0.00937353	-0.00663516
1.51059	-0.0394492	0.0141961	0.00548438
1.52066	-0.0569308	0.0150607	0.0472824
1.53073	-0.0100981	-0.0199024	-0.0309601
1.5408	-0.0309853	-0.0243327	-0.0419876
1.55087	-0.0346622	-0.00123625	-0.0262817
1.56094	-0.0846969	0.00777632	0.0665573
1.57101	-0.0348952	0.0163921	0.0237153
1.58108	-0.0036805	-0.00468561	0.0184862
1.59115	0.000463253	0.00470838	0.025235
1.60123	0.015332	0.0190004	0.043092
1.6113	0.0245835	-0.00961514	0.0248465
1.62137	-0.0243335	0.000801213	0.00249621
1.63144	-0.0106764	0.0425896	0.031003
1.64151	-0.0277221	0.0106782	-0.034271
1.65158	-0.0755165	-0.0219808	-0.0242434
1.66165	-0.0517952	-0.0152417	0.0156299
1.67172	-0.0149842	-0.012485	-0.0113156
1.68179	-0.00648053	-0.018792	0.00533265
1.69186	-0.0148706	0.0242328	0.0230178
1.70193	-0.012704	0.0230224	0.0479197
1.712	0.0154459	-0.00585207	0.0220396
1.72207	0.00819318	0.0109126	-0.0154532
1.73214	0.00067868	-0.00645657	-0.0232838
1.74221	-0.0111106	-0.0318365	0.0265629
1.75228	-0.00721623	-0.0149342	-0.00321169
1.76236	0.0242179	-0.0222475	-0.0367104
1.77243	0.0140392	-0.0283705	0.0263322
1.7825	0.00381238	-0.00682928	0.032138
1.79257	0.0327221	-0.0297825	0.0115908
1.80264	0.0440364	-0.0112776	0.0016779
1.81271	0.0303851	0.000956096	-0.00539805
1.82278	0.0195853	-0.00283185	-0.0209438
1.83285	0.0344029	0.0126216	0.0145651
1.84292	0.0166106	-0.00225936	0.0254145
1.85299	-0.00438798	-0.0044602	-0.0232159
1.86306	0.00592269	0.00943698	0.00162331
1.87313	0.0369988	-0.0135462	0.0245386
1.8832	0.00845725	-0.0361938	0.0176218
1.89327	-0.0312553	0.00339921	-0.0127491
1.90334	0.00454626	-0.00441684	-0.0139008
1.91341	0.028887	-0.0323898	0.00733076
1.92348	-0.00436012	-0.00105194	-0.0053745
1.93356	-0.00564147	-0.00459576	6.15617e-05
1.94363	0.0303226	-0.0380621	-0.0499693
1.9537	0.0498823	-0.0220903	-0.0424913
1.96377	0.0518476	0.00755331	0.0311168
1.97384	0.0324953	-0.0122723	0.00729641
1.98391	-0.00419189	-0.0227749	-0.0189973
1.99398	-0.00715815	0.0145736	-0.00549747
2.00405	-0.0306026	-0.0193671	-0.0023292
2.01412	-0.0233624	-0.0195862	-0.0332198
2.02419	-0.00211552	-0.0182188	-0.0467168
2.03426	-0.0339241	-0.0342925	0.00184227
2.04433	-0.0173174	0.00998185	-0.0115963
2.0544	0.0299741	0.0212663	-0.00121732
2.06447	0.0100957	0.0162234	-0.0232645
2.07454	0.0137152	-0.00552838	0.0462396
2.08461	0.0353089	-0.016508	0.051442
2.09468	0.016985	-0.0158609	-0.0305607
2.10476	-0.0179869	-0.059297	0.0323783
2.11483	0.00716016	-0.0296899	0.00420602
2.1249	-0.0285454	-0.00258597	-0.0128897
2.13497	-0.0349854	-0.00995219	-0.0152924
2.14504	-0.0163254	0.0236965	-0.0176963
2.15511	0.0382531	-0.00449929	-0.0278833
2.16518	0.0180934	0.0186652	-0.0163278
2.17525	0.00339557	0.0352983	-0.0632603
2.18532	-0.0264703	0.0211079	-0.0588329
2.19539	0.0193161	0.0365645	0.00891728
2.20546	-0.0237197	0.0458406	0.0280977
2.21553	-0.00474481	0.00100828	0.0522515
2.2256	-0.0388103	-0.0434128	0.0386998
2.23567	-0.0332191	-0.00999976	0.0385901
2.24574	-0.0255996	-0.020609	0.0237394
2.25581	0.00763842	0.0213473	0.0199657
2.26589	-0.0377531	0.0166416	0.0395217
2.27596	-0.010758	-0.0218174	-0.0565542
2.28603	0.0160528	0.0360056	0.0260646
2.2961	0.0220037	0.00578477	0.0157261
2.30617	0.061004	0.00176239	-0.033111
2.31624	-0.0505552	0.0708897	0.0548613
2.32631	0.00653957	0.0263537	0.0530045
2.33638	-0.0230825	0.0018974	-0.0367282
2.34645	-0.0329761	0.0254902	0.0290558
2.35652	0.0023407	0.0248054	-0.0658508
2.36659	-0.0280785	-0.0470775	-0.0308449
2.37666	-0.0104643	0.0182151	-0.0499622
2.38673	-0.042839	0.014461	-0.0600469
2.3968	0.0201676	0.033045	0.0379002
2.40687	-0.00453439	-0.0573651	-0.025713
2.41694	-0.0368364	-0.0422311	-0.0632951
2.42701	0.014921	0.0421465	0.0154402
2.43709	-0.0240666	0.0378546	0.051115
2.44716	0.0248353	-0.00807914	0.00950387
2.45723	-0.0240268	-0.00752013	0.00805369
2.4673	-0.000700609	0.0116234	0.00957885
2.47737	-0.0139048	-0.0227463	-0.0275771
2.48744	0.0112201	-0.0224488	-0.0197502
2.49751	0.0011423	0.0115394	-0.00742195
2.50758	0.011953	0.0335794	0.00515043
2.51765	-0.00972286	-0.0180659	0.0175397
2.52772	-0.0347257	-0.0378515	0.0619878
2.53779	-0.0563417	-0.00699389	0.0165771
2.54786	-0.00274756	-0.0428635	0.0165461
2.55793	-0.00149139	-0.0141891	0.0170035
2.568	0.0203486	0.0362589	0.0203755
2.57807	0.0260599	0.000906293	0.0187429
2.58814	0.025286	0.0168836	-0.00737991
2.59821	-0.00527292	0.00579127	-0.0125064
2.60829	-0.0138592	-0.0383979	-0.037698
2.61836	-0.00300564	-0.020286	-0.0413592
2.62843	0.0151723	-0.00200687	0.0131615
2.6385	-0.00569657	-0.00704363	-0.00935908
2.64857	0.0122227	0.0307199	0.0152701
2.65864	0.0332705	0.00435043	-0.00940148
2.66871	-0.00390861	-0.0108349	-0.0231476
2.67878	-0.0181684	-0.0164229	-0.0156991
2.68885	0.00437659	-0.00417387	-0.00539705
2.69892	-0.00913409	-0.0169039	-0.0426106
2.70899	-0.0277251	-0.0318163	-0.00827567
2.71906	-0.0114184	-0.015235	-0.00447339
2.72913	-0.039056	-0.0106169	-0.011108
2.7392	-0.0114558	0.003568	0.00122411
2.74927	-0.00420965	0.0210485	-0.0161678
2.75934	0.00734058	0.0107425	0.00693704
2.76942	-0.00434708	0.00690593	-0.00265766
2.77949	0.0023686	0.00897424	-0.0126797
2.78956	0.00113578	0.00322983	0.00226159
2.79963	-0.000934896	-0.00501722	0.0097259
2.8097	0.0145739	0.00809782	0.00241956
2.81977	-0.00952751	0.0104248	0.00298652
2.82984	-0.0391816	0.00411511	-0.0117208
2.83991	-0.019762	-0.0192845	-0.0204775
2.84998	-0.00461326	-0.0134941	-0.00579712
2.86005	-0.0148382	0.0146199	-0.0165382
2.87012	0.0111019	0.0272614	-0.0499085
2.88019	0.0254318	0.0152295	-0.0247162
2.89026	-0.0221261	0.0274591	-0.00700123
2.90033	-0.0229141	-0.00108264	0.0116439
2.9104	0.00986907	-0.00154815	-0.0184481
2.92047	0.0160734	0.0384832	-0.0427577
2.93054	-0.0073376	0.00652393	-0.0231991
2.94062	-0.0471498	-0.0119922	0.0155695
2.95069	-0.0539247	-0.00023474	0.0388343
2.96076	-0.0405865	-0.0200932	-0.0119069
2.97083	-0.0516602	-0.0250893	0.0282628
2.9809	-0.0188933	0.0261281	0.0565906
2.99097	0.0277918	0.0249626	-0.000684271
3.00104	0.00936998	0.0246061	-0.0409315
3.01111	0.00462229	0.0169868	-0.0163453
3.02118	0.0155934	-0.00825598	-0.018036
3.03125	-0.00742958	-0.00987775	-0.0116559
3.04132	-0.0224394	-0.0112397	-0.00791695
3.05139	-0.0693223	-0.0232212	-0.0112288
3.06146	-0.0553966	-0.0312198	0.0144649
3.07153	0.00307189	-0.036044	0.0300255
3.0816	-0.0145831	-0.0309495	-0.0478448
3.09167	-0.0356688	-0.0213683	-0.0292506
3.10174	0.0334121	0.00689011	-0.00501205
3.11182	-0.506528	-0.053306	0.0505818
3.12189	0.111721	0.019616	-0.340892
3.13196	0.229455	0.103342	-0.323647
3.14203	0.0809408	0.0420642	-0.128394
3.1521	-0.00758859	-0.0156728	0.011453
3.16217	0.0420222	0.0294655	0.0368576
3.17224	0.074973	-0.00283388	0.0562183
3.18231	0.0314493	-0.0351326	0.0825813
3.19238	-0.0287802	-0.0133078	0.0592603
3.20245	0.000180232	-0.000973314	-0.0543177
3.21252	0.00166208	0.008188	-0.0494433
3.22259	-0.0812194	0.0217445	-0.0471337
3.23266	-0.0495967	0.0241475	-0.0259809
3.24273	-0.00408628	0.00187766	-0.0461806
3.2528	0.0514209	0.0122623	-0.0137236
3.26287	0.00138546	0.0560795	0.0399266
3.27295	-0.0617094	0.0160809	0.0112698
3.28302	-0.0330664	-0.00711719	-0.0190512
3.29309	-0.0157739	0.00148463	0.0419199
3.30316	-0.10729	0.00700477	0.0620269
3.31323	-0.00967124	-0.0122242	-0.0197345
3.3233	0.0154089	0.00806754	0.0432937
3.33337	2.41343	0.219201	-0.926835
3.34344	-0.924247	-0.202796	1.40165
3.35351	-0.435585	-0.162362	0.337415
3.36358	-0.0664434	-0.195992	-0.155254
3.37365	0.154293	0.027961	-0.0613914
3.38372	0.0801087	-0.0107803	-0.205963
3.39379	0.0739038	-0.00687299	-0.270304
3.40386	0.0262422	-0.0282643	0.045755
3.41393	0.00763436	-0.0275757	0.0248546
3.424	0.0315691	0.0167533	0.0594194
3.43407	0.0507137	0.00599853	0.0369163
3.44415	-0.000849896	-0.0340833	0.06112
3.45422	0.0273145	-0.00470688	0.0379909
3.46429	0.000120981	-0.00862482	0.0291743
3.47436	-0.00560264	-0.00135783	-0.0303624
3.48443	-0.0541263	-0.0238605	0.0375116
3.4945	-0.076923	-0.0246496	0.00476923
3.50457	-0.0676146	0.00990066	0.0105858
3.51464	-0.0970781	-0.0120826	0.036422
3.52471	-0.0563964	-0.0137716	-0.0286839
3.53478	-0.0503058	0.0108915	0.00745216
3.54485	-0.0194497	0.0496995	0.00306112
3.55492	0.0100947	0.0394201	0.0516945
3.56499	0.0397616	0.00382655	0.090425
3.57506	0.0533157	0.0134142	-0.0116063
3.58513	0.0778261	0.0230171	-0.0114342
3.5952	0.0105859	-0.0141023	0.0162191
3.60527	-0.00878711	-0.00158506	0.00416937
3.61535	-0.0199047	0.00408099	-0.0126714
3.62542	-0.065461	-0.0121799	0.0010971
3.63549	-0.067621	0.00482327	0.0280647
3.64556	-0.0418723	-0.00876752	-0.0370694
3.65563	-0.0192665	0.0233416	-0.0375825
3.6657	-0.0258656	-0.00559981	-0.00327478
3.67577	-0.029077	-0.00623634	0.0314298
3.68584	-0.0158389	0.0172968	0.0230439
3.69591	-0.026099	-0.00355794	0.0215093
3.70598	-0.0241212	-0.020171	0.0153668
3.71605	0.00187435	-0.00959312	-0.0109019
3.72612	0.00505842	-0.0125195	0.00923146
3.73619	0.0144837	-0.0142712	0.0264048
3.74626	0.0172414	-0.0124679	0.00216599
3.75633	-0.00507065	0.0337687	0.0336066
3.7664	-0.00144237	0.0220064	-0.00224389
3.77648	0.00659614	0.00909944	0.0207741
3.78655	-0.0177593	0.0277931	0.0555415
3.79662	-0.0235595	0.0346761	0.0372848
3.80669	0.00326391	0.0176637	-0.0385432
3.81676	-0.0202813	-0.0180869	-0.0506351
3.82683	-0.0578489	-0.0203753	0.0104846
3.8369	-0.0691099	-0.00807663	0.034541
3.84697	-0.0295739	-0.0128071	-0.0137291
3.85704	-0.0111861	0.00191712	-0.0162228
3.86711	0.00895702	0.0356382	-0.00489191
3.87718	0.0111716	0.0279008	-0.0086823
3.88725	-0.0116376	0.00569785	-0.0309814
3.89732	-0.0420147	0.0668837	0.195865
3.90739	0.274029	0.0625024	0.0458806
3.91746	0.429825	-0.00332622	-0.10746
3.92753	0.106771	0.00268312	0.193941
3.9376	-0.0911605	-0.0322623	0.123272
3.94768	-0.115279	-0.060662	0.0066905
3.95775	-0.0897902	-0.0444759	0.0540338
3.96782	0.133361	0.0114897	0.0280895
3.97789	0.184592	-0.0193826	-0.0785428
3.98796	0.0717464	-0.0405658	-0.074915
3.99803	0.0371329	0.00178827	-0.0139139
4.0081	0.0235008	0.029509	-0.00204573
4.01817	-0.0156435	0.021631	-0.00706863
4.02824	-0.0468679	0.00992278	-0.000845436
4.03831	-0.0492832	-0.0119326	0.0291513
4.04838	0.0776506	0.0183969	0.0195673
4.05845	0.0470992	0.0157673	0.0291181
4.06852	0.013344	-0.00505075	0.0116157
4.07859	0.0391901	-0.00984719	-0.0428125
4.08866	0.0543556	0.0274095	-0.056011
4.09873	0.0949274	0.0384821	0.0182848
4.1088	0.165773	0.0691317	0.0477967
4.11888	0.0487231	0.0287212	0.0675741
4.12895	0.000780397	-0.000596209	-0.00342237
4.13902	0.0299103	0.0416806	-0.0589916
4.14909	0.168522	0.0274695	-0.053815
4.15916	0.047507	-0.0423293	-0.0898822
4.16923	-0.00917689	-0.00437062	-0.005786
4.1793	-0.00596959	0.00987603	0.0246001
4.18937	-0.0436705	-0.0285047	-0.0402126
4.19944	-0.066753	0.00715012	0.0248734
4.20951	-0.042426	0.0272564	0.0327397
4.21958	-0.0435959	-0.0438084	-0.000668089
4.22965	-0.0423697	-0.0227559	-0.0403465
4.23972	0.0503945	0.0304164	-0.0547555
4.24979	0.0517439	-0.0328356	-0.0639758
4.25986	-0.603155	-0.0555601	0.0376445
4.26993	0.0438547	0.115303	-0.523453
4.28001	0.0740448	0.188267	-0.189577
4.29008	-0.207501	0.128677	0.292538
4.30015	-0.0768156	0.0023613	0.123075
4.31022	-0.0272757	-0.0163955	0.0900413
4.32029	0.0681327	-0.00382596	0.118166
4.33036	0.00448426	0.0211796	0.0158897
4.34043	0.0249886	0.00698539	-0.0698142
4.3505	-0.00821738	0.000680071	-0.0371854
4.36057	0.0427142	0.0286308	-0.015618
4.37064	0.00580163	-0.0107249	-0.0758519
4.38071	0.00477838	-0.0363171	-0.0161965
4.39078	-0.0491311	0.0185502	0.0175202
4.40085	-0.022321	0.0330733	-0.0517739
4.41092	0.00436776	0.012776	-0.0639837
4.42099	0.0122279	0.00514347	0.0241952
4.43106	-0.0369027	-0.0044269	0.0166723
4.44113	0.00986871	0.0238445	0.00467986
4.45121	-0.0229336	0.0405345	-0.0120415
4.46128	0.0235495	-0.00675559	0.0068678
4.47135	-0.0421797	0.00450226	0.00507228
4.48142	0.042696	-0.0152762	0.02609
4.49149	0.0103698	-0.0461174	-0.0315802
4.50156	0.00689873	0.0333013	0.0610651
4.51163	0.0271558	-0.0148433	-0.0730945
4.5217	0.0547379	-0.0236356	-0.0201952
4.53177	0.00733922	0.00811469	0.00365287
4.54184	0.0189927	0.0144438	0.0210939
4.55191	0.000831353	-0.0119724	-0.00438647
4.56198	-0.0215559	-0.02992	-0.0358619
4.57205	0.020953	0.0085135	-0.0127855
4.58212	0.0069748	-0.053654	-0.0170512
4.59219	0.0183726	-0.0367201	-0.0198656
4.60226	-0.0254657	0.0201612	0.0477714
4.61233	-0.0200632	-0.0318135	0.00841569
4.62241	-0.0170406	-0.0396445	-0.0714503
4.63248	0.0131433	0.01182	-0.0152674
4.64255	0.00214435	0.0197666	0.00374689
4.65262	0.0040243	0.00967735	-0.0355713
4.66269	-0.0525821	-0.00332625	0.0114616
4.67276	0.00236872	-0.0108366	-0.00914581
4.68283	0.012627	0.00911884	-0.00597832
4.6929	0.00999201	0.00217321	0.0344528
4.70297	-0.0191319	-0.0111963	-0.00795412
4.71304	0.00110646	-0.000410977	0.0130866
4.72311	-0.0245991	0.00552215	0.033183
4.73318	-0.0321314	0.00596227	0.0205205
4.74325	-0.00142507	0.00251157	-0.00186013
4.75332	0.0490261	-0.000984724	0.0100626
4.76339	-0.0363869	-0.0259804	0.126815
4.77346	-0.33527	-0.0783044	0.328514
4.78354	-0.167861	-0.104749	-0.0241517
4.79361	-0.197702	-0.0911396	0.183364
4.80368	-0.0718273	-0.082382	-0.0564904
4.81375	-0.169464	-0.089188	-0.104739
4.82382	0.0958601	-0.0693978	0.178236
4.83389	0.0728384	-0.00439554	0.000412317
4.84396	0.0563319	-0.0132912	-0.00385653
4.85403	-0.0164953	-0.0161745	0.0647518
4.8641	-0.00449949	0.016297	0.00463832
4.87417	-0.0176812	0.0308703	-0.018685
4.88424	0.00996905	0.0198093	-0.0222319
4.89431	0.0201169	-0.00159686	-0.0117243
4.90438	0.00130303	0.00905603	-0.0342815
4.91445	0.018484	-0.00700881	0.00491463
4.92452	0.0188645	-0.0070058	0.00262312
4.93459	-0.0246093	-0.011458	0.00507801
4.94466	-0.0319967	-0.015391	0.0553853
4.95474	-0.00630371	-0.0315001	-0.00682476
4.96481	-0.00421652	-0.0227218	-0.0588106
4.97488	-0.00892001	-0.0131039	-0.0395678
4.98495	0.0261709	-0.0332403	-0.0420374
4.99502	0.0258762	-0.00549423	-0.0104031
5.00509	-0.010399	-0.0115308	-0.000435455
5.01516	0.00799752	-0.0247386	-0.0062448
5.02523	0.0152091	0.0133081	0.00199978
5.0353	-0.000223719	0.0160921	0.00392779
5.04537	-0.0228436	-0.00698716	0.000256363
5.05544	-0.0165483	-0.00989408	-0.0256924
5.06551	-0.00419547	0.0157789	-0.0589038
5.07558	-0.0132202	0.0139101	-0.0871557
5.08565	-0.00231708	0.0200219	-0.0408986
5.09572	0.00744167	0.0282396	-0.0296295
5.10579	0.0126076	0.012959	-0.00912842
5.11586	0.0223055	0.00652868	-0.00918062
5.12594	0.0103513	0.0197823	-0.0397501
5.13601	-0.00103813	-0.00656041	-0.00566783
5.14608	0.00541018	0.0131327	0.0361203
5.15615	0.00296288	0.0231518	0.0439884
5.16622	-0.0164366	0.00948943	0.030113
5.17629	0.00785001	-0.0115582	0.0126213
5.18636	0.00645647	-0.0204139	-0.00413778
5.19643	-0.0151241	-0.0125614	-0.0568312
5.2065	-0.0228188	0.039328	0.00755592
5.21657	0.00995305	0.0258946	-0.00691426
5.22664	-0.0206902	-0.00667342	-0.0071633
5.23671	-0.0243251	0.00586345	-0.0412411
5.24678	0.0174809	-0.0113849	0.0369855
5.25685	0.00163961	0.00719426	0.0170217
5.26692	0.00117938	-0.0189044	-0.0154544
5.27699	-0.0363747	-0.0168202	-0.0262328
5.28707	-0.00253284	0.0473822	0.0240236
5.29714	-0.0130176	0.0119599	0.00566092
5.30721	0.0213433	-0.00936342	-0.0229408
5.31728	0.0199834	-0.0154282	0.00610474
5.32735	-0.00395954	0.0338198	0.0129483
5.33742	0.0162563	0.0230548	0.0332342
5.34749	-0.00605428	-0.0215392	-0.00420435
5.35756	-0.00401211	0.0548838	0.0556464
5.36763	-0.000902168	0.0230913	0.0486935
5.3777	0.0185342	-0.00404757	-0.008614
5.38777	-0.00684489	0.00404568	0.0188554
5.39784	-0.0185222	0.0268633	0.0227187
5.40791	0.0178038	-0.0036947	-0.0209194
5.41798	-0.0118498	-0.0309114	0.0612044
5.42805	0.0213618	0.00292176	0.039003
5.43812	-0.0144581	0.0345114	-0.0146171
5.44819	0.0126633	-0.0267947	0.000410904
5.45827	0.0121347	0.0154141	-0.00998319
5.46834	-0.0480569	0.0102287	-0.00807979
5.47841	-0.0122874	-0.0250171	0.0177178
5.48848	-0.00439696	0.00281636	-0.0078773
5.49855	0.0194985	-0.0254573	0.0444225
5.50862	0.0172083	0.00712045	0.0428883
5.51869	0.0186092	-0.0269375	-0.057356
5.52876	0.070576	0.0164574	-0.0341886
5.53883	0.0250834	-0.00270929	0.0280402
5.5489	-0.0138497	0.0269819	-0.0190612
5.55897	-0.0200698	-0.00717038	-0.0427873
5.56904	-0.0115824	0.0174534	0.0332321
5.57911	0.0103462	-0.00723992	-0.0214715
5.58918	0.00843861	0.0148799	-0.0343365
5.59925	0.00768876	0.0395623	0.0305713
5.60932	-0.0119229	0.0410963	0.027592
5.61939	0.032535	-0.0164219	-0.0113379
5.62947	0.021098	-0.0311707	-0.00234099
5.63954	0.0411379	-0.00362314	0.00918807
5.64961	0.0327334	0.00700154	0.0523478
5.65968	0.00973947	0.0317091	0.0395833
5.66975	0.0141483	-0.024059	0.0211419
5.67982	-0.0100703	-0.00176431	-0.00486843
5.68989	-0.0666852	0.00212733	-0.0170244
5.69996	0.00445956	-0.0257661	-0.00836794
5.71003	-0.00864125	0.00377347	-0.0676287
5.7201	-0.0182497	0.0342885	0.022875
5.73017	0.0229517	-1.67477e-05	-0.025278
5.74024	0.0183902	-0.00296634	-0.0271973
5.75031	-0.0166906	0.0246158	-0.0660734
5.76038	0.00390613	0.0289119	-0.0440519
5.77045	0.0343735	-0.0234032	-0.0459256
5.78052	0.0112047	0.00393142	-0.0260404
5.7906	-0.0191526	0.0388485	-0.0161037
5.80067	-0.0371976	-0.0182765	0.0134253
5.81074	-0.0594556	-0.0159697	0.0177319
5.82081	0.0538896	0.0148547	-0.00918074
5.83088	0.0214359	-0.0471565	0.013147
5.84095	0.0543494	-0.005516	0.0106034
5.85102	-0.0471072	0.0117704	0.0313451
5.86109	-0.0180416	0.0023681	0.00635683
5.87116	0.0277617	0.00146383	0.000640905
5.88123	0.023805	-8.23903e-05	0.0651159
5.8913	0.0406905	-0.0164612	-0.00206108
5.90137	0.0543401	-0.0337719	-0.0081718
5.91144	0.0057787	-0.0201998	0.0120396
5.92151	0.0576494	-0.0294406	-0.042852
5.93158	0.0313485	-0.0159315	-0.0377147
5.94165	-0.00296417	0.0146358	-0.0245658
5.95172	0.0336602	-0.00866114	-0.00610608
5.9618	0.000307041	-0.00995586	-0.00644428
5.97187	-0.0095027	0.0227756	-0.00832276
5.98194	0.00542121	-0.0108999	-0.00366964
5.99201	-0.0283769	-0.0155388	-0.00727065
6.00208	-0.0297356	0.0408262	-0.00462997
6.01215	0.0234551	0.00307436	-0.0134478
6.02222	-0.00448578	-0.0253703	0.0142037
6.03229	-0.0259423	0.00680756	0.00737127
6.04236	-0.00858116	0.0144945	0.00160774
6.05243	0.00646008	0.028788	0.00391689
6.0625	0.0355236	0.00684141	-0.0127398
6.07257	0.0165367	0.0481267	0.00725575
6.08264	0.000921509	0.0630293	0.0283812
6.09271	0.0351868	-0.00431321	0.0270464
6.10278	0.0502256	-0.0338295	-0.00175347
6.11285	0.00912697	0.0337608	0.0010634
6.12292	-0.0256549	0.0202658	-0.0150553
6.133	-0.00205696	-0.0407756	-0.00503519
6.14307	-0.00302597	-0.016551	0.0127674
6.15314	-0.0116551	0.0193464	-0.00618804
6.16321	0.00536547	0.00116692	-0.053326
6.17328	0.139466	-0.00559893	-0.0504759
6.18335	0.0568469	-0.00781752	0.0235108
6.19342	-0.00665339	0.0209547	0.0276279
6.20349	0.0157988	-0.00410582	-0.0245444
6.21356	0.0069095	-0.0148533	-0.0410417
6.22363	-0.0187797	-0.0429038	0.0197315
6.2337	-0.024953	-0.0379339	-0.00691271
6.24377	-0.0122968	-0.00301058	0.0366944
6.25384	-0.0232458	-0.0323109	-0.00212649
6.26391	-0.0149535	-0.00309328	-0.0223623
6.27398	-0.00109145	0.026598	-0.0228687
6.28405	0.0324851	-0.0262753	-0.0216511
6.29413	0.024146	0.033355	-0.046511
6.3042	-0.0127725	0.0537252	-0.0524961
6.31427	-0.0256887	-0.0146945	0.00227882
6.32434	0.0112611	-0.0578144	0.022828
6.33441	-0.00417215	-0.000515476	-0.0373879
6.34448	0.00165039	0.00267674	-0.0264831
6.35455	0.0160182	-0.0274705	0.0695805
6.36462	-0.0252318	0.0342714	0.0627995
6.37469	-0.0459432	0.0335297	0.0717803
6.38476	0.00463481	-0.0442525	0.0439412
6.39483	0.0178292	-0.0325105	-0.00657285
6.4049	0.0060149	-0.0037844	0.0258135
6.41497	0.0210106	0.0166572	0.0337242
6.42504	0.016857	0.0124722	0.00426581
6.43511	0.0182275	0.00522135	-0.0143136
6.44518	-0.0531249	-0.00851342	0.029637
6.45525	-0.0162771	-0.0317228	-0.0141202
6.46533	0.0273461	-0.0203699	-0.0381788
6.4754	0.00346478	-0.023878	0.00517547
6.48547	0.0425415	0.00523832	-0.0373164
6.49554	0.0309595	-0.0251687	0.0150703
6.50561	0.0442039	-0.0127738	-0.0147726
6.51568	-0.0275733	-0.0146905	0.0424506
6.52575	0.0272823	-0.0265244	-0.000927386
6.53582	-0.000503334	0.00653417	0.0507413
6.54589	-0.0328663	0.011243	-0.0275491
6.55596	0.0795157	-0.00292223	-0.0175218
6.56603	0.0327031	-0.00210231	0.0127995
6.5761	-0.0497994	0.0251773	0.00936847
6.58617	0.0307839	-0.0451523	-0.0180188
6.59624	-0.0129762	0.0177737	0.0292093
6.60631	-0.0601694	0.00329308	-0.0160153
6.61638	-0.0199298	-0.040514	0.00997286
6.62645	0.0622106	-0.000595314	-0.0256537
6.63653	0.0222047	0.0248284	-0.00560076
6.6466	0.0334073	0.015875	-0.0104346
6.65667	0.0232935	-0.00519299	-0.074869
6.66674	0.0571556	0.00164808	0.0333805
6.67681	0.0253135	0.029547	-0.00634926
6.68688	0.0198844	-0.0214716	0.0132017
6.69695	0.00452194	-0.0224712	-0.0400312
6.70702	0.0244225	-0.0469382	-0.0155356
6.71709	-0.0208165	-0.0167475	0.0119817
6.72716	-0.0215762	0.0304268	0.0788061
6.73723	0.000491251	0.0220141	0.0255139
6.7473	-0.168542	-0.0152523	-0.0240394
6.75737	-0.730687	-0.0885136	0.147935
6.76744	-0.212969	0.240813	0.340768
6.77751	0.25377	0.0334129	-0.245175
6.78758	0.0195207	-0.0267242	-0.288745
6.79766	0.121254	0.0487133	-0.0646907
6.80773	-0.000506888	0.0249845	-0.084181
6.8178	0.00645475	0.0260822	-0.145922
6.82787	0.00990692	-0.0252488	0.0351649
6.83794	-0.0205001	-0.0187486	0.0398308
6.84801	-0.0103034	0.00653546	0.00917312
6.85808	-0.0308225	0.00443044	0.0305331
6.86815	0.0175517	-0.0367367	-0.0373396
6.87822	0.000771087	-0.0329816	-0.0122403
6.88829	-0.0264464	0.00225257	-0.0202214
6.89836	0.0127118	-0.0227545	-0.0956611
6.90843	-0.012995	-0.00438069	-0.0115547
6.9185	-0.0140892	-0.00749091	0.00672584
6.92857	0.0268851	-0.0406149	-0.0535454
6.93864	0.0227546	-0.0243307	-0.0312662
6.94871	-0.0170508	0.0132092	0.00793523
6.95878	-0.0098438	-0.00456381	0.0180691
6.96886	0.0104706	0.00377116	0.0138295
6.97893	0.0111166	0.0104889	0.0554886
6.989	0.0180035	-0.00401818	0.0438339
6.99907	0.00535933	-0.00363254	-0.0113996
7.00914	-0.00630814	0.0297122	0.0174734
7.01921	0.0133203	0.0173722	-0.00211518
7.02928	0.00980126	0.00600897	-0.0221003
7.03935	-0.0119061	0.0144669	-0.0119797
7.04942	-0.00901612	0.00379045	0.00595345
7.05949	-0.0111004	-0.0149884	-0.0132378
7.06956	-0.0265665	-0.0362391	-0.00935776
7.07963	-0.00422118	0.00166848	0.00468471
7.0897	0.00741258	0.0063272	0.00726788
7.09977	0.0241124	-0.0100254	-0.00206605
7.10984	0.00948607	0.00264413	0.0156538
7.11991	0.0205709	0.00455622	0.0115078
7.12998	0.0100494	0.0115037	0.0230783
7.14006	-0.0410907	0.034549	0.0684468
7.15013	-0.0185615	0.00380721	0.0525818
7.1602	-0.0402672	0.00263679	0.00119422
7.17027	-0.0239328	0.0873884	0.0347978
7.18034	0.0215307	-0.00942414	0.0369529
7.19041	0.0261619	-0.0316977	0.0169673
7.20048	-0.0190115	0.0474994	0.0321987
7.21055	-0.0307834	0.0275602	0.0423945
7.22062	0.00251927	0.000983325	0.0119559
7.23069	-0.0121668	0.0136366	0.00361167
7.24076	-0.0715	-0.00816454	0.00761148
7.25083	0.00637366	0.00403072	-0.0216989
7.2609	0.0422095	0.00116545	-0.0219417
7.27097	-0.0153993	0.0195708	-0.00277578
7.28104	-0.0043741	-0.0426514	-0.0190716
7.29111	0.00584239	-0.0168153	0.00485436
7.30119	-0.0478601	-0.0203067	0.0295581
7.31126	-0.031479	0.0097405	0.058778
7.32133	0.000450785	0.0410999	-0.00067128
7.3314	0.00875997	-0.0146227	0.000517384
7.34147	0.0386908	0.00459042	0.0281033
7.35154	0.0010253	0.00120519	0.060129
7.36161	0.0367697	0.00641053	0.065604
7.37168	0.0269666	-0.01585	-0.0187192
7.38175	0.0463534	0.0319881	-0.0202794
7.39182	0.024923	0.0582807	0.00376424
7.40189	-0.00869928	-0.0294555	0.0179502
7.41196	0.00760501	0.00181122	-0.00599585
7.42203	-0.0307172	0.0153625	0.0700331
7.4321	0.0231691	-0.00438103	0.0086564
7.44217	0.0063462	0.0232844	-0.0181901
7.45224	-0.0812776	0.0426031	0.0172493
7.46231	0.00236277	-0.00405714	-0.00712599
7.47239	0.0249068	0.0369746	0.0149003
7.48246	0.00449716	0.0379368	-0.0405731
7.49253	0.00450345	-0.0105396	-0.0224232
7.5026	0.00690506	-0.0126599	-0.00921741
7.51267	-0.0530563	-0.00358045	-0.00832569
7.52274	-0.00753409	-0.0232639	-0.0195802
7.53281	0.00431157	0.0143492	0.0231201
7.54288	-0.0182822	-0.0253234	-0.0140288
7.55295	0.0412919	-0.0244384	-0.0618133
7.56302	0.0171103	0.0176756	-0.0022066
7.57309	0.00719498	-0.00277148	0.0555537
7.58316	0.00716682	0.00186669	-0.0343604
7.59323	0.0242126	0.0220534	-0.0380777
7.6033	0.0516185	-0.052334	0.027022
7.61337	0.0170883	-0.0251744	0.00114908
7.62344	-0.0331133	-0.0410601	-0.00685575
7.63351	-0.0279721	0.046951	-0.0272658
7.64359	-0.0155228	-0.0369739	0.0138171
7.65366	0.00202218	0.024929	0.0233908
7.66373	0.00328518	0.0149323	0.0557156
7.6738	0.0622254	0.00397404	0.00117248
7.68387	-0.0095876	0.0229532	0.0598344
7.69394	-0.0450094	-0.000853424	-0.0153228
7.70401	0.0123411	-0.00241308	-0.0145825
7.71408	-0.0160485	0.00115393	0.00179828
7.72415	-0.00134826	-0.0100193	-0.0316252
7.73422	-0.0353093	-0.0515578	-0.0401918
7.74429	-0.0164456	-0.0361356	-0.00356154
7.75436	0.00729977	-0.00191489	0.0200228
7.76443	0.0473252	-0.0166599	0.0180644
7.7745	0.011437	0.00014999	-0.025428
7.78457	0.000328003	0.0060648	-0.0110894
7.79464	0.0046902	-0.0175006	0.00190691
7.80472	0.0104245	0.0172527	-0.0549663
7.81479	0.00233321	0.0420265	0.0250014
7.82486	0.0233544	0.0169954	-0.0058092
7.83493	0.0189687	-0.00843266	-0.0350478
7.845	-0.038351	-0.00612053	0.0057669
7.85507	-0.0314018	0.00726923	0.0216796
7.86514	-0.00957658	0.0485213	-0.00404862
7.87521	-0.0135245	0.000967115	0.0127801
7.88528	-0.0220513	0.00283591	0.0493692
7.89535	0.0277704	-0.0232037	0.021307
7.90542	0.0466462	-0.0191838	0.0056199
7.91549	0.0484311	0.00981467	-0.0444146
7.92556	0.0161573	0.00638813	0.00220008
7.93563	-0.0299572	0.0136884	-0.00787151
7.9457	-0.126106	-0.0615613	-0.0225359
7.95577	-0.0747955	-0.0691078	0.0821995
7.96584	0.0155614	0.062414	0.0746456
7.97592	0.0143191	0.041455	-0.0555583
7.98599	-0.0265665	-0.0725214	0.0221384
7.99606	0.0563873	-0.0212301	-0.0104097
8.00613	0.0781068	0.0317704	0.0235551
8.0162	0.0881374	0.0604027	-0.00758944
8.02627	0.0657423	0.04451	-0.0241163
8.03634	0.0583153	-0.00350212	0.0234739
8.04641	0.081268	0.0226893	0.00720591
8.05648	0.0569788	0.0449594	-0.042769
8.06655	-0.0311993	0.00929227	-0.0722059
8.07662	-0.0733576	-0.0645826	0.0380814
8.08669	-0.0331494	-0.0148764	0.0882641
8.09676	-0.0343388	-0.00180618	-0.0268671
8.10683	-0.0615295	-0.0369991	-0.107026
8.1169	-0.0233977	0.00228631	-0.0123494
8.12697	-0.0171265	-0.0269245	0.121068
8.13704	-0.0484074	0.0241567	0.00323494
8.14712	-0.0665201	0.0224583	-0.0219324
8.15719	0.0280683	-0.0588905	0.0308264
8.16726	0.106253	-0.0492204	-0.00448876
8.17733	0.0829677	-0.0127706	-0.0206087
8.1874	0.018056	0.0291727	0.0161883
8.19747	0.0191081	0.0410415	0.0273351
8.20754	0.0526919	-0.00652212	-0.0240489
8.21761	0.0250425	-0.00699673	-0.0479215
8.22768	-0.02078	-0.000314497	0.00945843
8.23775	-0.0819983	-0.0102333	0.0767564
8.24782	-0.119764	-0.031321	-0.00116357
8.25789	-0.0787323	-0.0883579	0.00386297
8.26796	0.089649	-0.0779964	-0.00867348
8.27803	0.167043	0.131737	-0.143906
8.2881	0.0589511	0.0823613	-0.0384922
8.29817	-0.0354681	-0.0172608	0.0447352
8.30825	0.0423084	-0.00683622	0.0150323
8.31832	0.0953356	0.0156586	-0.0194464
8.32839	0.0829796	0.0342324	-0.0534521
8.33846	0.00670519	0.043041	0.0218408
8.34853	0.030361	0.0231789	0.0109829
8.3586	-0.0361771	-0.0145507	0.0407287
8.36867	-0.0552141	-0.00659512	-0.0095118
8.37874	-0.0652478	-0.0173921	-0.0134874
8.38881	-0.0653931	-0.0037441	0.0137261
8.39888	-0.00241232	-0.0285477	0.0106512
8.40895	-0.0181661	-0.0289675	-0.0279304
8.41902	-0.026366	-0.00398091	-0.0197436
8.42909	-0.0127605	-0.0433097	0.0779819
8.43916	-0.0117581	-0.0216487	0.0533173
8.44923	-0.0479864	0.00477332	0.00419335
8.4593	0.0132285	-0.0134057	-0.039788
8.46937	0.0339473	-0.00326402	-0.00988602
8.47945	0.106943	0.0564995	0.00870968
8.48952	0.019662	0.0102148	-0.0139844
8.49959	0.056664	0.0162528	-0.160228
8.50966	0.0976797	0.0436838	0.0703284
8.51973	0.0033966	0.0297181	0.000684441
8.5298	-0.00986178	-0.132669	-0.0170792
8.53987	0.0315374	-0.0825937	-0.065894
8.54994	-0.0401302	0.0116259	-0.0456777
8.56001	-0.0235099	-0.00401745	-0.0415742
8.57008	-0.00853696	0.0035632	-0.0594581
8.58015	-0.117526	-0.0279185	-0.0535533
8.59022	-0.0392884	-0.0545477	-0.0187327
8.60029	-0.0201326	-0.00883505	0.0523737
8.61036	-0.0221554	-0.0101498	0.0327823
8.62043	-0.0436171	-0.00539156	-0.0293503
8.6305	0.00434915	-0.0123367	-0.0195526
8.64057	0.0468229	0.00859589	0.00616014
8.65065	0.0495329	-0.0075503	-0.00958488
8.66072	0.0632298	-0.00198328	-0.068039
8.67079	0.0503009	-0.0358144	0.0348381
8.68086	-0.107509	0.0208846	-0.012431
8.69093	0.1138	-0.0119244	0.0886459
8.701	-0.128482	0.0471548	-0.108662
8.71107	0.0355937	-0.102491	0.0841503
8.72114	-0.158683	0.110046	-0.125685
8.73121	0.0546338	-0.0672491	0.328846
8.74128	-0.169365	0.0576406	-0.27459
8.75135	0.034385	-0.0379438	-0.0630849
8.76142	0.0230027	0.00305277	0.0357642
8.77149	-0.0292267	0.0240144	-0.0291286
8.78156	0.0108601	0.0196615	0.0270262
8.79163	0.0116408	0.0461463	0.0196129
8.8017	0.141466	0.0166464	-0.0493545
8.81178	0.0872397	0.0216463	-0.046667
8.82185	0.0410863	0.0208171	-0.0493203
8.83192	-0.0206305	-0.0307631	-0.0180231
8.84199	-0.0145367	0.00312073	0.0307146
8.85206	-0.00394104	-0.0141736	-0.0594486
8.86213	0.0295739	0.00440499	-0.0475158
8.8722	-0.0619714	-0.00356697	0.106476
8.88227	-0.0892157	-0.0354803	0.0767209
8.89234	-0.0616195	-0.0470235	-0.0290841
8.90241	-0.0175432	0.00945645	-0.0288868
8.91248	0.0231004	0.0897092	-0.017017
8.92255	-0.0484074	-0.00995452	0.0439855
8.93262	-0.022701	-0.110504	0.103126
8.94269	0.042816	0.0788329	-0.0191302
8.95276	0.125027	0.0392265	0.0263069
8.96283	0.0530327	-0.00378306	0.0522581
8.9729	0.0161956	-0.00591473	-0.10746
8.98298	-0.00890712	-0.019674	-0.00224059
8.99305	0.00355781	0.00932144	0.0145842
9.00312	-0.0146469	-0.0667249	0.010153
9.01319	-0.0286701	-0.0219985	0.0515738
9.02326	0.0175487	0.0817027	0.0411905
9.03333	0.00395372	0.109857	0.0296622
9.0434	-0.0516482	0.0641591	0.0758114
9.05347	-0.0387224	-0.0314814	0.0726589
9.06354	-0.0335323	-0.0839705	-0.0155923
9.07361	-0.0824341	-0.0235298	0.03173
9.08368	-0.108829	0.0972437	0.0966907
9.09375	-0.062591	-0.0262149	0.0260309
9.10382	-0.0134842	-0.0875707	-0.017179
9.11389	0.0321289	-0.0594647	0.0397842
9.12396	0.0118551	-0.0162681	0.0828764
9.13403	0.0107774	-0.0382572	0.0306312
9.1441	0.00953234	-0.0454914	0.0341256
9.15418	0.00227586	0.00528799	-0.0378354
9.16425	0.00148961	0.0321719	-0.0104167
9.17432	0.00207718	0.0268747	-0.012967
9.18439	-0.00992321	0.015657	-0.0637205
9.19446	-0.0232353	-0.0308851	-0.0607028
9.20453	-0.0270407	-0.0158277	-0.0245897
9.2146	-0.0478133	-0.000511166	-0.014051
9.22467	-0.0571412	0.0121502	-0.0432622
9.23474	-0.0245223	0.0310674	-0.00744132
9.24481	-0.00868752	0.0103117	0.00709275
9.25488	-0.00626464	0.00214423	0.0167127
9.26495	-0.000514808	-0.0165824	0.0200299
9.27502	0.00282467	-0.0327458	-0.0140224
9.28509	0.0413972	0.0115612	-0.0120496
9.29516	0.0141897	0.0515651	0.00609659
9.30523	-0.0191361	-0.00468341	-0.0114788
9.31531	0.0107558	-0.039997	-0.0071893
9.32538	0.00517152	0.0536868	0.0232376
9.33545	-0.0251925	-0.0156236	0.008162
9.34552	0.0414135	-0.00687027	-0.00230635
9.35559	0.0469086	0.0294098	0.0434377
9.36566	0.0398768	0.012696	0.0407495
9.37573	-0.00951288	-0.0316362	0.0145924
9.3858	0.000149344	0.0118151	0.0323034
9.39587	-0.0118402	0.0223837	-0.0468187
9.40594	0.0247089	-0.0419683	0.0131877
9.41601	0.012583	-0.0225651	-0.0628845
9.42608	0.0715786	0.0284542	0.0529977
9.43615	-0.00251236	0.0122433	-0.0240376
9.44622	0.0101279	-0.038834	-0.000533898
9.45629	0.48665	-0.0541906	-0.180064
9.46636	-0.0884458	0.284563	0.0141375
9.47643	-0.0937334	0.227275	-0.130589
9.48651	-0.065192	-0.0147661	0.00233114
9.49658	-0.0454394	-0.0381034	-0.171344
9.50665	-0.00278303	-0.0176481	0.0746274
9.51672	-0.00193541	0.0566095	-0.0382734
9.52679	-0.0111888	-0.0776898	0.113213
9.53686	0.0105333	-0.0315238	-0.0677585
9.54693	-0.0201124	0.00563946	0.0681779
9.557	0.0119861	-0.0208264	0.00544423
9.56707	0.00111607	0.040354	0.0022647
9.57714	-0.0178562	-0.0551885	-0.0993805
9.58721	0.0158297	0.0234325	-0.016365
9.59728	0.0453806	0.0638455	0.113479
9.60735	-0.0269817	0.000910728	-0.0153448
9.61742	-0.00856956	-0.0483217	-0.118748
9.62749	0.0361182	0.0136822	0.0853119
9.63756	-0.0339551	-0.0324834	0.0515632
9.64763	-0.0101871	-0.0573173	-0.0855949
9.65771	0.0304571	0.0700702	0.144113
9.66778	-0.104481	-0.0909178	0.137538
9.67785	0.0486656	-0.0584246	-0.13509
9.68792	-0.0428008	0.0745779	-0.103748
9.69799	-0.0291955	0.0284882	0.145701
9.70806	0.101429	0.0443949	0.0711457
9.71813	-0.049318	0.039336	-0.133339
9.7282	0.0848922	0.0666561	0.0728653
9.73827	-0.0709213	-0.0291621	-0.0369858
9.74834	0.0482585	0.0888255	0.225263
9.75841	-0.103787	-0.00772516	-0.134849
9.76848	-0.0470614	-0.0315831	0.194141
9.77855	-0.068141	-0.028723	-0.185625
9.78862	-0.0822935	-0.00514153	0.133399
9.79869	0.0321241	0.00183837	-0.179443
9.80876	-0.0540199	0.0219255	0.0444725
9.81884	0.0810574	-0.0451759	-0.108214
9.82891	0.1531	0.032864	0.0452502
9.83898	0.152694	-0.00478812	-0.0465093
9.84905	0.0638326	0.0367375	0.0707911
9.85912	0.0356547	-0.0567159	0.0747947
9.86919	0.0142666	-0.0149157	0.0528428
9.87926	-0.0239677	-0.0365004	0.0544957
9.88933	-0.0260849	-0.0505778	0.0141409
9.8994	-0.0669445	-0.0470008	0.0209811
9.90947	-0.0953535	0.0147121	-0.0262714
9.91954	-0.111312	-0.01792	-0.0511243
9.92961	-0.0585449	-0.0304868	-0.0480846
9.93968	-0.0536148	-0.00544074	-0.0226147
9.94975	-0.0467778	0.0297219	-0.0397171
9.95982	-0.0579923	0.0118297	0.0138131
9.96989	-0.0546352	0.00849444	0.0802061
9.97996	0.00528577	0.0289476	0.0718463
9.99004	0.0569818	0.0254445	-0.00275205
10.0001	0.101124	-0.0138405	-0.0316048
10.0102	0.0950194	-0.0279637	0.0315985
10.0202	0.0800334	-0.00732746	-0.00215263
10.0303	0.0946795	-0.0356871	-0.0235137
10.0404	0.112026	-0.0437984	-0.0107105
10.0505	0.13157	-0.0100548	-0.0127541
10.0605	0.0664571	-0.0229726	0.0337404
10.0706	0.0151839	-0.017946	0.0493664
10.0807	-0.049914	-0.00664812	0.00386578
10.0907	-0.094123	-0.0194285	-0.0304348
10.1008	-0.14175	0.000734732	0.0211409
10.1109	-0.139192	0.0320369	0.0230648
10.121	-0.113638	0.0411528	-0.045522
10.131	-0.104137	0.011542	-0.0435979
10.1411	-0.0398121	-0.0145592	-0.00267216
10.1512	0.0145033	-0.0125691	-0.00733946
10.1612	0.0717787	0.000514135	0.00129909
10.1713	0.0786999	0.0239123	-0.0175584
10.1814	0.0743906	0.0156944	-0.0505605
10.1914	0.117551	-0.00468484	0.00600655
10.2015	0.147375	0.00174563	0.0331398
10.2116	0.11299	-0.0105159	-0.0122821
10.2217	0.060707	-0.0280264	-0.00515254
10.2317	0.045548	-0.00958724	0.029962
10.2418	-0.000876371	-0.0157605	0.0776348
10.2519	-0.0537248	-0.0148994	0.0485105
10.2619	-0.0642149	0.025131	-0.0395275
10.272	-0.0915813	0.0340793	-0.0476549
10.2821	-0.10227	0.036329	-0.0391653
10.2922	-0.0958842	0.0255172	-0.00928244
10.3022	-0.086645	-0.0144845	-0.00305036
10.3123	-0.0654736	-0.0173769	-0.0670693
10.3224	-0.00853575	-0.0217189	-0.0386655
10.3324	0.00918705	-0.0236194	-0.0251845
10.3425	0.0525598	-0.00783491	-0.0365597
10.3526	0.109085	-0.0199282	-0.0498572
10.3626	0.110313	-0.0202111	-0.0366042
10.3727	0.122482	0.0537248	0.00263488
10.3828	0.0844639	0.0167752	0.0213817
10.3929	0.032881	-0.0237601	0.0103436
10.4029	0.0266013	-0.0105539	0.0162888
10.413	-0.00647282	0.00837441	0.0416434
10.4231	-0.0706597	-0.0145672	0.0686767
10.4331	-0.126393	-0.0337856	-0.00128983
10.4432	-0.125364	-0.0120645	-0.00764235
10.4533	-0.100745	-0.0251791	-0.0130029
10.4634	-0.0997926	-0.0139864	0.084786
10.4734	-0.00910322	0.000853418	0.0200845
10.4835	-0.0404383	-0.0245593	-0.0394747
10.4936	0.000553156	0.00753854	0.0313219
10.5036	0.0534769	0.00629612	-0.0152366
10.5137	0.0608684	0.0325349	-0.0180176
10.5238	0.0408399	-0.015643	-0.0736853
10.5338	0.0545027	0.000342349	-0.0407148
10.5439	0.0580642	0.025941	-0.0377124
10.554	0.0804092	-0.0251812	-0.0205803
10.5641	0.078096	0.0105345	-0.0687861
10.5741	0.0314713	0.00322069	-0.03551
10.5842	-0.00679167	-0.0199619	0.0378662
10.5943	0.0294387	-0.022728	-0.00855399
10.6043	-0.0193986	0.0180547	-0.0667539
10.6144	-0.0902848	0.0159758	0.0360874
10.6245	-0.092232	-0.0197178	-0.0103629
10.6346	-0.00528153	0.0194179	-0.0663651
10.6446	-0.0191916	0.00902388	-0.0701058
10.6547	-0.0317436	0.0285679	0.0204223
10.6648	0.0179601	-0.00695659	0.0936167
10.6748	-0.0100338	0.0239254	-0.0563329
10.6849	0.0241669	0.0295239	-0.0116414
10.695	0.0507688	-0.0104858	-0.0767822
10.705	0.0795831	0.00104904	-0.0536355
10.7151	0.0274496	0.0126757	-0.0247053
10.7252	0.0528306	-0.015187	0.0186447
10.7353	0.0205028	0.0078844	0.0678239
10.7453	-0.0423731	-0.00313201	0.069854
10.7554	-0.0559633	-0.0453981	0.0115056
10.7655	-0.0567515	-0.0218833	0.0820637
10.7755	-0.0979756	-0.00781345	0.14597
10.7856	-0.0227297	0.00331173	-0.0158623
10.7957	-0.0225266	0.0291924	-0.0382438
10.8058	-0.0177765	0.0225111	0.0187973
10.8158	0.00426153	-0.00026801	-0.0346345
10.8259	-0.00813971	-0.0117249	-0.0383526
10.836	-0.00421431	-0.0195195	-0.0749833
10.846	0.0131385	-0.0275886	-0.032527
10.8561	0.0394022	-0.00797809	0.00107992
10.8662	0.0181956	0.0195213	-0.0522264
10.8762	0.0419867	0.00582212	0.0201088
10.8863	0.0146606	0.0130886	0.0148081
10.8964	-0.00680642	-0.011551	0.0438709
10.9065	0.00595157	-0.0204281	0.0753759
10.9165	-0.0161113	-0.00129022	0.0676515
10.9266	-0.0339479	-0.000294955	0.045081
10.9367	-0.0487026	0.00185996	-0.0167494
10.9467	-0.021725	0.00361812	-0.0396538
10.9568	-0.0417295	0.0208791	-0.0489924
10.9669	-0.0241674	-0.00253982	-0.0516164
10.977	0.0215925	-0.0081061	-0.0958654
10.987	0.0163419	-0.00526491	-0.0537337
10.9971	0.0378549	-0.0122505	-0.00606232
11.0072	0.0127366	0.0306752	0.0237113
11.0172	8.02925e-06	-0.0055923	0.0066413
11.0273	0.0241595	-0.0148062	0.0330443
11.0374	0.0155653	-0.0185576	0.0806424
11.0474	-0.0108057	-0.01793	0.085303
11.0575	-0.0134192	0.00914085	0.0952896
11.0676	0.022236	0.0154138	0.0483617
11.0777	-0.00419707	0.0248602	-0.00773619
11.0877	-0.0293334	0.0265702	-0.0597136
11.0978	-0.010357	0.000219108	-0.0636254
11.1079	-0.0118886	-0.00124525	0.00616317
11.1179	-0.0422748	0.00160833	-0.00630782
11.128	-0.0221699	0.01174	-0.0172678
11.1381	-0.00305705	0.00116531	-0.00167712
11.1482	-0.0107845	-0.0189007	0.0207498
11.1582	0.0154996	-0.0065879	0.0246376
11.1683	0.0119833	0.0147883	0.00669032
11.1784	-0.00483883	0.0180215	0.0280193
11.1884	0.0285098	-0.0314342	0.0582443
11.1985	0.0426629	-0.031467	0.00370694
11.2086	-0.0253526	0.0163208	-0.0372806
11.2186	-0.0656734	-0.00118398	-0.0401822
11.2287	-0.0149604	-0.000836326	0.0454017
11.2388	-0.00140254	-0.00602793	0.0653118
11.2489	-0.0298367	-0.0218705	0.0482041
11.2589	-0.0173622	-0.00202309	0.0422656
11.269	-0.0176896	0.0125902	-0.0129895
11.2791	0.0066564	0.00417773	0.008751
11.2891	0.0142789	0.0051033	0.0333599
11.2992	-0.0197092	-0.0039049	0.000732784
11.3093	-0.0278031	-0.0123793	-0.0904272
11.3194	0.0127023	0.0114792	-0.0556723
11.3294	0.0438542	0.0205213	0.00702113
11.3395	0.0352723	0.0235968	-0.00783092
11.3496	0.0270873	0.00932291	-0.0142758
11.3596	-0.00320763	0.030449	-0.0721889
11.3697	-0.0251559	0.00549345	-0.0498414
11.3798	-0.00578336	-0.00862868	-0.00938212
11.3898	-0.0324464	-0.0116732	0.0335791
11.3999	-0.0418518	-0.00438776	0.0333118
11.41	-0.0356016	-0.020128	0.0484402
11.4201	0.0112064	-0.0151471	0.0087433
11.4301	-0.0115502	0.00146078	0.0192778
11.4402	-0.014852	-0.0146005	0.0132104
11.4503	0.0397075	-0.00209765	-0.0659012
11.4603	0.031645	0.0109696	-0.0961393
11.4704	0.0716781	-0.0136371	-0.0656328
11.4805	-0.000547607	0.0236455	-0.042054
11.4906	-0.0247083	-0.00798057	-0.0361148
11.5006	-0.00834185	-0.0448863	-0.0300539
11.5107	0.0331709	-0.0273337	0.016122
11.5208	-0.0260548	-0.0242922	0.055065
11.5308	-0.0255427	-0.00451194	0.0393203
11.5409	0.025552	0.0104922	0.0661473
11.551	-0.00448438	0.00495802	0.10509
11.561	0.0102329	-0.0106165	0.0426982
11.5711	0.0170307	-0.0134348	0.00467495
11.5812	-0.0230468	0.0209326	0.0202709
11.5913	-0.0117941	-0.0180032	0.0586023
11.6013	0.00572951	-0.0233088	0.0476937
11.6114	-0.00676121	0.0334279	-0.0132943
11.6215	-0.0321002	-0.00109814	0.0420965
11.6315	0.00980573	0.0171102	0.00302024
11.6416	0.0301048	0.028452	-0.0478051
11.6517	-0.00768668	-0.0209054	0.00436633
11.6618	0.0551376	0.0276527	0.00725214
11.6718	0.00669453	0.00939277	-0.0174497
11.6819	0.0120533	-0.00793632	0.0350124
11.692	0.00567755	-0.00423873	0.0265617
11.702	-0.00616139	0.0536276	-0.0362404
11.7121	-0.0182145	-0.00998103	0.0692621
11.7222	-0.0208078	-0.00414688	0.0854248
11.7322	0.0220084	0.000680332	0.04745
11.7423	-0.0133008	0.0316154	-0.0169526
11.7524	0.0300635	0.0315449	-0.031779
11.7625	-0.0341623	0.0272478	-0.0602462
11.7725	-0.00262468	-0.0345899	-0.00352318
11.7826	-0.020694	-0.0222393	-0.0255653
11.7927	-0.0148076	-0.00248796	-0.0116572
11.8027	0.0053451	0.0208799	-0.0401677
11.8128	-0.0221559	-0.0239893	-0.0011729
11.8229	0.0169164	0.0201157	-0.0216255
11.833	-0.010296	0.00104956	-0.111566
11.843	-0.0154448	0.0114484	-0.032301
11.8531	0.0290731	0.0605284	0.0314923
11.8632	0.0101291	0.0425006	-0.0130052
11.8732	-0.00838815	0.0163249	0.0238579
11.8833	-0.0305987	0.00067808	0.0864939
11.8934	-0.019744	0.0246585	0.0777349
11.9034	-0.0370729	-0.00221821	0.00366922
11.9135	-0.0310564	-0.0136375	0.0408561
11.9236	-0.0264901	-0.00404518	0.0502576
11.9337	-0.0374578	-0.01789	-0.0312975
11.9437	0.0139212	-0.0173607	-0.0620095
11.9538	0.0145339	0.041671	-0.023522
11.9639	0.0132386	-0.00800046	-0.0115534
11.9739	-0.00938902	-0.023202	0.0346568
11.984	0.028316	0.0254548	0.0591243
11.9941	-0.0107921	0.00511178	0.0206197
12.0042	-0.0219924	-0.0511347	0.0163416
12.0142	0.0152838	-0.00578803	-0.0016685
12.0243	0.0111167	0.00153422	-0.00432729
12.0344	0.0218111	0.00363835	0.0226169
12.0444	0.0357704	0.0264185	-0.0473005
12.0545	-0.00480564	0.0326128	0.0267952
12.0646	0.000165241	-0.00419178	0.0261546
12.0746	0.00541029	-0.0145372	0.0276206
12.0847	-0.0257068	-0.0264997	0.033116
12.0948	-0.0141761	-0.0322361	0.02314
12.1049	0.0103851	-0.0253837	0.0558133
12.1149	0.0201143	0.00666143	0.0400562
12.125	0.0276	0.00722812	-0.0167612
12.1351	0.0359092	0.00108139	0.0553133
12.1451	0.00221057	0.0190287	0.0121087
12.1552	-0.0184117	0.0228926	-0.0595981
12.1653	0.0249303	0.0173728	-0.0281548
12.1754	0.0388682	0.00155378	0.0307554
12.1854	-0.000386379	-0.0139138	0.00937492
12.1955	-0.0117941	-0.00734733	-0.0391041
12.2056	-0.00794345	0.00375148	-0.0347411
12.2156	-0.0144692	-0.00550445	0.0023072
12.2257	0.0261696	0.0116683	-0.0218465
12.2358	0.0193228	0.0406822	-0.0677429
12.2458	-0.00588076	0.0269721	-0.0690218
12.2559	0.00124873	0.00175738	-0.0413844
12.266	-0.0167075	0.000484085	-0.00283603
12.2761	-0.0162314	-0.0168257	0.00960544
12.2861	-0.0361109	-0.00998043	-0.0160228
12.2962	-0.0518096	-0.0259465	0.0289978
12.3063	-0.0319404	-0.0475579	0.0266103
12.3163	0.0119611	-0.00998014	-0.0364147
12.3264	0.0285797	0.0066936	-0.0462011
12.3365	0.0155199	0.00481313	-0.00860833
12.3466	0.0317721	-0.00353662	0.0484859
12.3566	0.0303849	0.0117499	0.0486809
12.3667	-0.0120789	-0.0197313	0.0375698
12.3768	-0.0176776	-0.0300939	-0.00302059
12.3868	0.00330444	-0.0138448	0.00294412
12.3969	0.00113889	-0.00507211	0.0315229
12.407	0.0161242	-0.00163957	-0.0361806
12.417	0.0425536	0.00307511	-0.064165
12.4271	0.0474682	0.00235806	-0.00448741
12.4372	0.0280757	0.0185328	-0.00328094
12.4473	0.0310679	0.0220585	-0.0580738
12.4573	0.0212429	0.0131944	-0.0407075
12.4674	0.0215041	0.0120363	-0.0350597
12.4775	0.0310886	0.00759789	-0.00998718
12.4875	-0.0202244	-0.00482048	-0.0316978
12.4976	-0.0330546	-0.0492819	-0.00847121
12.5077	0.0212846	-0.0024804	-0.0498806
12.5178	0.0383469	0.0429634	0.00134614
12.5278	0.0162861	0.0105725	-0.0137112
12.5379	0.0189753	0.015276	-0.0709894
12.548	0.0215581	0.0143645	-0.0444818
12.558	0.0482044	-0.00807679	-0.0301966
12.5681	0.00849065	0.00408901	-0.033047
12.5782	0.0034758	-0.0132859	0.0304781
12.5883	-0.0645268	-0.0179806	0.00710434
12.5983	-0.0145634	-0.0219732	-0.0625342
12.6084	-0.00654582	0.0278827	0.0370773
12.6185	-0.00934623	0.00818925	0.0771945
12.6285	0.0150908	-0.0316303	-0.00623882
12.6386	0.00414325	-0.00548605	0.0309633
12.6487	-0.0296614	-0.0160237	0.031483
12.6587	-0.0100902	-0.0199847	-0.0206252
12.6688	0.0400905	0.0100663	0.00824447
12.6789	0.0054179	0.00438133	-0.0342058
12.689	-0.0179474	-0.0140598	0.0348697
12.699	0.047555	-0.0131375	0.0225697
12.7091	-0.0158023	0.00283007	-0.0259399
12.7192	-0.0696833	-0.0145122	-0.0467249
12.7292	0.00650203	-0.0152985	-0.107488
12.7393	-0.000395974	-0.00593779	-0.0485933
12.7494	0.0578311	0.00827532	-0.0146926
12.7595	-0.00994818	0.0156831	-0.0116764
12.7695	0.00392287	-0.0365404	0.00987868
12.7796	-0.0242281	-0.0196874	0.023117
12.7897	-0.0111645	-0.00466547	-0.0295479
12.7997	-0.0438614	0.0282398	0.00840839
12.8098	-0.0483594	-0.0200011	0.0299455
12.8199	0.00262403	-0.0206651	0.000990736
12.8299	0.0157969	0.00602975	0.0170639
12.84	-0.046286	0.00051337	0.108606
12.8501	0.00558427	-0.00918395	0.0330796
12.8602	-0.0264071	0.0233244	0.0291465
12.8702	-0.0169856	-0.0212393	0.0659841
12.8803	0.00470449	-0.0287547	-0.0142137
12.8904	-0.0208918	0.00765968	-0.0683197
12.9004	0.0128691	-0.0185785	-0.029531
12.9105	0.0520016	-0.0165422	0.0123698
12.9206	0.0169465	0.0354969	0.050974
12.9307	-0.0371968	-0.0160406	0.0365533
12.9407	-0.014939	-0.0161714	0.0109626
12.9508	-0.016057	0.0100495	-0.0477403
12.9609	-0.0315484	0.00285355	0.000443692
12.9709	-0.0333674	0.00151683	0.0734683
12.981	-0.00404279	0.0165373	0.0223775
12.9911	0.0170578	1.77804e-05	0.0234709
13.0011	0.0160489	-0.0263286	0.0344819
13.0112	0.0365554	-0.00352672	0.0488491
13.0213	-0.0103052	0.00415352	0.00979462
13.0314	-0.0217344	-0.0180126	-0.020975
13.0414	0.00576194	0.0324527	-0.0174589
13.0515	-0.0261131	0.0558488	0.00313103
13.0616	-0.0164076	0.0150814	0.0426106
13.0716	-0.024768	0.00223733	0.0730868
13.0817	-0.00798151	0.0165383	-0.00294401
13.0918	-0.00192146	-0.000609358	-0.0159874
13.1019	-0.000545387	-0.0161094	0.0543882
13.1119	0.00283005	-0.0052426	0.0173718
13.122	-0.039433	-0.0105657	-0.0319287
13.1321	-0.0134584	0.0132398	-0.0682143
13.1421	-0.00535127	0.00552033	-0.0841607
13.1522	-0.0233209	-0.00308453	-0.0732068
13.1623	0.0467073	0.0205215	-0.0529
13.1723	0.019797	0.0378405	0.0158219
13.1824	-0.0245383	0.00771951	0.047388
13.1925	-0.018046	-0.0199147	0.0397991
13.2026	-0.0134606	-0.00975334	0.0514202
13.2126	-0.0229738	0.0245774	0.0577761
13.2227	0.000945608	0.0176938	0.0450577
13.2328	-0.00237136	0.00582012	0.0445759
13.2428	-0.0140648	-0.00506223	0.054042
13.2529	0.0136862	0.0228427	0.0155488
13.263	0.0288341	0.0196651	-0.0473288
13.2731	0.0259162	-0.0106889	-0.0355156
13.2831	0.0436593	0.00514489	-0.0419224
13.2932	0.0167253	0.0189793	-0.0542199
13.3033	-0.0177458	-0.00350269	-0.0462243
13.3133	0.011199	-0.000747176	-0.0268923
13.3234	0.0343462	0.0219663	-0.00396012
13.3335	0.000731435	0.0102707	0.00804579
13.3435	0.0455016	-0.0144868	0.00515821
13.3536	0.0472579	-0.0168756	-0.00647359
13.3637	-0.0165063	0.0049356	-0.0454348
13.3738	-0.0242855	0.00387336	-0.0113685
13.3838	-0.0142875	-0.00611577	0.0158915
13.3939	-0.0339825	-0.0232465	0.0394274
13.404	-0.00191906	-0.0182983	0.0301102
13.414	0.0110715	-0.0306693	0.0253849
13.4241	-0.0383456	-0.0134083	0.0538618
13.4342	-0.00930161	-0.0225454	-0.000151091
13.4443	0.00968751	0.00408348	-0.0423394
13.4543	0.0121825	0.0255392	-0.0189007
13.4644	0.0168906	-0.00644178	0.012136
13.4745	0.0226215	0.00692583	-0.0377912
13.4845	0.0214409	0.0325763	-0.0865139
13.4946	-0.0104857	-0.00418212	0.00369359
13.5047	0.00125882	-0.0230119	0.0612159
13.5147	0.00181918	0.0147221	-0.0264039
13.5248	-0.022507	0.0181081	-0.104824
13.5349	-0.010227	0.0305117	-0.0290237
13.545	-0.0363376	0.0231394	-0.000694675
13.555	-0.0116819	-0.00835741	0.0042114
13.5651	-0.00129271	0.0150159	-0.0313037
13.5752	-0.00881698	0.0126167	-0.0380416
13.5852	0.0292523	-0.00943626	0.0144239
13.5953	0.0508119	0.0148513	0.0484562
13.6054	0.0241388	0.00585902	0.0337513
13.6155	-0.0675822	-0.00546823	-0.0241213
13.6255	-0.00818013	-0.0331685	0.0495972
13.6356	0.0343765	0.0371378	-0.0607665
13.6457	0.000273193	0.0151588	0.0407067
13.6557	0.000288655	-0.00700377	0.0146924
13.6658	0.00123501	0.0177998	0.0268094
13.6759	-0.00299127	0.0024114	0.0335702
13.6859	-0.00564585	0.00862906	0.0190448
13.696	0.00932347	0.0117336	-0.0173315
13.7061	0.0020455	-0.0275054	-0.00979332
13.7162	-0.00533931	-0.0397824	-0.0133026
13.7262	0.00314493	0.00662549	0.00876163
13.7363	-0.00987051	0.0117886	0.00331427
13.7464	-0.037977	-0.0475322	0.0280792
13.7564	0.0462819	0.00307087	-0.0216796
13.7665	0.0140553	0.0233697	0.0232881
13.7766	0.0250565	-0.0068077	-0.086239
13.7867	0.0085612	0.0261401	0.11945
13.7967	0.00105307	-0.030878	0.092015
13.8068	-0.0383767	-0.0166075	-0.0393924
13.8169	-0.00303875	-0.00973772	-0.00327355
13.8269	0.00579437	-0.013946	-0.0501772
13.837	-0.00403433	-0.00202607	-0.121677
13.8471	0.0276862	0.00812367	-0.0397809
13.8571	0.02689	0.0233238	-0.0366036
13.8672	0.0190895	-0.0151565	-0.0816435
13.8773	0.057187	-0.0206018	-0.0231061
13.8874	0.0372549	0.00845274	0.0935833
13.8974	-0.00185787	-0.0408313	-0.0179672
13.9075	0.0436387	-0.00175207	-0.0462803
13.9176	-0.00441674	0.000644992	-0.00937642
13.9276	-0.035215	-0.0234626	0.0447556
13.9377	0.0283463	-0.00151925	-0.0224491
13.9478	-0.00381109	0.0180436	0.0345536
13.9579	-0.0424693	-0.000494836	0.00865658
13.9679	-0.0114413	-0.0601404	0.0388215
13.978	0.0440611	0.00506111	0.0180538
13.9881	0.00183055	-0.00642796	-0.0325282
13.9981	-0.0218765	-0.0149416	-0.0134527
14.0082	0.0238128	0.0135777	-0.0255799
14.0183	-0.0173973	0.0177898	-0.0247206
14.0283	-0.00498868	0.00620907	-0.0522564
14.0384	0.0257909	0.0106805	-0.0458553
14.0485	0.00934391	0.019867	-0.0804987
14.0586	0.0424873	-0.0198356	0.00163464
14.0686	0.0211411	-0.0259995	0.048415
14.0787	-0.00847607	0.00647193	0.0112889
14.0888	-0.0166095	-0.0227631	0.0431341
14.0988	-0.00599043	-0.0351523	0.0427085
14.1089	-0.0155899	-0.000819187	0.000933249
14.119	-0.0260138	-0.00101655	-0.0170367
14.1291	-0.0133671	-0.0195549	0.0466751
14.1391	0.013012	-0.00412709	0.00754443
14.1492	0.00608061	0.0161226	-0.0509633
14.1593	0.0410035	0.0161087	-0.110629
14.1693	0.0242903	0.00275879	-0.0735832
14.1794	-0.00640043	-0.0150618	-0.0224824
14.1895	0.00020081	0.00630222	0.0342504
14.1995	0.0219841	0.0126518	0.0347563
14.2096	-0.030528	0.00163698	0.0215612
14.2197	-0.0486166	-0.00370139	0.024893
14.2298	-0.0170078	-0.0205905	0.0472844
14.2398	0.000257367	-0.00304039	0.0268306
14.2499	0.0123496	-0.00845457	0.00856026
14.26	0.0165679	-0.00398091	-0.00261336
14.27	-0.00938051	-0.00912009	-0.0331642
14.2801	-0.0281576	-0.0144269	-0.0362633
14.2902	-0.0305774	0.0191152	-0.0478754
14.3003	-0.0246814	0.0219264	-0.0747451
14.3103	0.0103587	-0.0214963	-0.0881248
14.3204	0.0557136	-0.0249256	-0.0290699
14.3305	0.0151311	-0.00189605	0.0419489
14.3405	-0.0314787	-0.00077787	0.0395895
14.3506	-0.00232881	0.000508336	0.0567623
14.3607	-0.00041579	0.0108432	0.085136
14.3707	-0.039442	-0.00467016	0.0822608
14.3808	-0.0374679	0.00795384	0.0499982
14.3909	-0.0293444	-0.0118163	0.0269374
14.401	-0.0129811	-0.0441596	0.0376757
14.411	0.0201517	0.00148491	-0.0136884
14.4211	-0.0129994	0.0178327	-0.0276983
14.4312	-0.0191729	-0.00323381	0.0141091
14.4412	0.0214525	0.000174878	0.0520415
14.4513	0.0125176	0.0200632	0.0190517
14.4614	-0.00879192	-0.00973094	0.0404906
14.4715	-0.00501577	-0.0294694	0.00676966
14.4815	-0.0122256	0.00415219	-0.0388221
14.4916	-0.00139937	0.00746997	0.000654283
14.5017	0.0292484	0.0130156	-0.0435785
14.5117	-0.0124759	0.0197668	-0.00568809
14.5218	-0.0377661	-0.0151535	0.0327825
14.5319	0.0209893	-0.0312445	-0.0214587
14.5419	0.0424222	-0.00923433	-0.0386971
14.552	0.0223211	-0.0169023	-0.0190548
14.5621	0.0156023	-0.0242041	0.0336689
14.5722	0.00477941	0.00583237	-0.00499197
14.5822	-0.00053467	0.01382	-0.0186434
14.5923	0.0212818	-0.0035067	-0.0119089
14.6024	0.018059	-0.0175832	-0.0480209
14.6124	0.0117698	0.0237906	-0.000651922
14.6225	0.0262481	0.0134525	0.0502572
14.6326	0.00651682	0.0415359	-0.0208578
14.6427	-0.0164489	-0.0437228	-0.00121361
14.6527	-0.020127	-0.00675886	-0.0254993
14.6628	-0.022172	0.0300983	-0.00298623
14.6729	0.0176841	0.0326231	0.0582231
14.6829	0.0436399	0.0260537	0.0274222
14.693	0.0444344	0.0126026	-0.0101384
14.7031	-0.0423711	0.00235567	0.0867461
14.7131	-0.0534469	-0.00512944	0.00379079
14.7232	-0.00157987	-0.00803699	0.00134071
14.7333	-0.0137382	0.00915118	0.0588728
14.7434	-0.0374774	-0.0135624	0.0819048
14.7534	-0.0235119	-0.0243589	0.0654318
14.7635	0.0182556	-0.0113671	-0.0239629
14.7736	-0.0253494	-0.00382278	-0.0444643
14.7836	-0.0456996	-0.0150926	0.0126097
14.7937	0.0119534	0.0404405	0.00982353
14.8038	-0.0408515	0.0581164	-0.0254945
14.8139	0.00831825	0.0583211	0.0690395
14.8239	0.0553216	0.00606598	-0.0536963
14.834	-0.0266876	0.0203848	0.0224506
14.8441	0.00116659	0.0275626	0.051875
14.8541	-0.0060436	-0.0474435	-0.0644679
14.8642	-0.0124448	-0.0100687	-0.0196936
14.8743	-0.000886225	0.00516553	0.000925871
14.8843	0.0349951	0.0336596	-0.0320284
14.8944	-0.022797	0.0551347	-0.0236317
14.9045	0.0315935	0.0424606	-0.0271218
14.9146	0.0453959	0.00131373	0.00172117
14.9246	0.00431271	0.00678237	-0.0368799
14.9347	-0.0476193	0.0252668	-0.0438803
14.9448	-0.0223572	-0.0411638	0.0342934
14.9548	-0.0253084	-0.0229846	0.0483799
14.9649	-0.04097	-0.0362688	0.0197721
14.975	-0.0228639	-0.0172654	-0.0457012
14.9851	-0.0112274	-0.0140395	-0.00646927
14.9951	-0.0078611	-0.018855	0.0430315
15.0052	-0.0156794	-0.016575	0.0460994
15.0153	0.0354927	0.0105311	-4.26513e-05
15.0253	-0.00134771	0.0114837	0.0703156
15.0354	-0.00579371	0.00607353	0.0598782
15.0455	-0.0140544	-0.0227435	0.0518665
15.0555	-0.0120459	-0.0134593	0.0383002
15.0656	-0.0140046	-0.0301454	0.0536335
15.0757	-0.00561795	-0.00253518	0.058224
15.0858	-0.0102012	0.0133411	-0.0133729
15.0958	0.00140509	0.000866789	0.0346583
15.1059	0.00266593	-0.0113481	0.0291307
15.116	-0.0134072	8.83012e-05	0.0725985
15.126	0.0127865	-0.00252856	0.0281141
15.1361	-0.000112878	0.0140807	-0.0262739
15.1462	-0.0284083	0.000767712	-0.00555877
15.1563	-0.0324881	0.0111974	-0.0131798
15.1663	-0.0106739	0.0193079	-0.0459023
15.1764	0.000123532	0.0110153	-0.00518488
15.1865	-0.00796946	-0.0132073	-0.0273038
15.1965	0.0311329	0.00921621	-0.0740968
15.2066	0.00805567	0.0159691	-0.0559798
15.2167	-0.00733118	0.0309465	0.0383846
15.2267	0.0139335	0.0232189	0.0612151
15.2368	-0.0160867	0.0148048	-0.010712
15.2469	-0.0234629	-0.0212733	-0.0281509
15.257	0.000502303	-0.034097	-0.0172855
15.267	-0.000190764	-0.0121307	0.0071442
15.2771	-0.00100601	-0.00807811	-0.0210544
15.2872	0.047907	0.0061369	-0.0163101
15.2972	0.0438566	0.0105711	-0.0171971
15.3073	0.0328024	0.00211171	-0.00685443
15.3174	0.0280193	0.0251922	-0.00305857
15.3275	0.0125092	0.0281618	0.0298044
15.3375	-0.0407055	-0.0138668	0.114958
15.3476	-0.043246	-0.046267	0.0835346
15.3577	0.00633732	-0.0345998	0.000901623
15.3677	-0.0113402	0.00817997	0.0446409
15.3778	-0.0268512	0.0153764	0.0213019
15.3879	0.022884	0.00520834	-0.0610589
15.3979	0.0405909	0.0112909	-0.0490755
15.408	0.00136716	0.0063262	-0.0763536
15.4181	0.00852981	0.016605	-0.0698955
15.4282	-0.0133299	0.0235727	-0.00546999
15.4382	-0.0163606	-0.00775911	0.00919588
15.4483	0.017138	0.0201131	-0.0149573
15.4584	0.0175858	0.0213741	-0.00938716
15.4684	0.00379697	0.00697965	0.0109833
15.4785	0.00259637	0.0155496	0.054058
15.4886	-0.0160758	0.0244249	0.0459847
15.4987	-0.0250893	0.00148556	0.0233995
15.5087	0.0209047	-0.0128325	0.0662281
15.5188	0.0423777	0.00113923	0.0835585
15.5289	-0.0040969	-0.0137586	0.0647556
15.5389	-0.0192302	-0.0248264	0.0289689
15.549	-0.0273752	-0.0204065	-0.03758
15.5591	-0.0106181	-0.0339767	-0.0382726
15.5691	0.0182085	-0.0240331	-0.0287425
15.5792	-0.00446346	0.00824945	-0.0511954
15.5893	0.0104315	0.0316819	-0.0842078
15.5994	0.0240445	0.0017546	-0.0632353
15.6094	0.0220324	0.00588488	-0.0265621
15.6195	0.0022589	0.0232446	0.0020235
15.6296	0.00663991	-0.0299827	-0.00372364
15.6396	0.00525298	0.0204734	-0.014293
15.6497	-0.0227911	0.00339435	-0.0335909
15.6598	0.0141975	-0.0238012	-0.0238213
15.6699	0.0372701	-0.0339221	-0.0447527
15.6799	-0.0122129	0.0231567	0.0108076
15.69	0.0268812	-0.0046642	0.0239787
15.7001	0.0414239	0.0359048	-0.00646013
15.7101	-0.00116226	0.014386	-0.0300482
15.7202	0.0155471	-0.0130225	-0.0454121
15.7303	0.0143579	-0.0415906	-0.0279548
15.7403	0.00955238	0.0219129	-0.0406949
15.7504	-0.0234514	-0.0554677	-0.0444937
15.7605	0.00406116	-0.0220695	-0.0184008
15.7706	0.0155672	0.034629	0.0303358
15.7806	-0.0218768	-0.00170507	0.0338451
15.7907	0.0387626	-0.00869635	-0.0133965
15.8008	-0.0329984	-0.00668479	0.0181427
15.8108	-0.00844601	0.034954	0.0426474
15.8209	-0.0566321	-0.0361694	-0.0267201
15.831	0.0179232	-0.0210347	-0.00209373
15.8411	-0.00279709	-0.00658653	-0.0185289
15.8511	0.0136377	0.0102575	0.0332273
15.8612	-0.0104243	0.031008	-0.0328144
15.8713	-0.0359359	0.00517366	-0.0297186
15.8813	-0.0265202	-0.000885077	0.0753819
15.8914	0.0322118	-0.0322579	-0.0131819
15.9015	0.0165573	0.0224137	-0.00491357
15.9115	-0.0149969	-0.00850085	-0.0534384
15.9216	0.0123476	-0.000322234	-0.0387308
15.9317	-0.00866292	0.0152419	-0.000173667
15.9418	-0.0398969	-0.00566222	-0.0299605
15.9518	-0.00261924	-0.0114446	-0.0280394
15.9619	0.0506037	0.042435	-0.0451611
15.972	0.00281354	0.0187393	-0.0313683
15.982	-0.00394602	0.0232116	-0.0457735
15.9921	0.0207273	-0.0147811	-0.0824257
16.0022	0.0299432	-0.0127039	0.00918768
16.0123	0.0107166	0.021661	0.0535603
16.0223	-0.0064198	-0.0330087	0.103152
16.0324	-0.0123108	-0.0410778	0.0765109
16.0425	-0.00817705	0.0249041	0.00426208
16.0525	0.0100707	0.0206349	0.00710219
16.0626	0.0225198	0.0247124	0.00492274
16.0727	0.0585739	-0.00204771	0.0226566
16.0827	0.0578693	0.023652	-0.0543811
16.0928	0.00211062	0.0199483	-0.084238
16.1029	-0.00994731	-0.0101375	0.0331835
16.113	-0.00845587	-0.0136882	-0.00861953
16.123	-0.0261909	-0.0227623	-0.017005
16.1331	-0.0200006	-0.0436617	-0.00190647
16.1432	0.0118393	-0.0170757	0.00313744
16.1532	0.014977	0.0260663	-0.0216487
16.1633	0.0222646	0.0140174	-0.0517744
16.1734	0.0406144	0.00485268	-0.070333
16.1835	-0.00120153	0.0190187	-0.0470817
16.1935	-0.0147282	-0.00238328	-0.0214032
16.2036	-0.0174978	0.00493184	-0.0118675
16.2137	-0.0288738	-0.00934409	-0.0127373
16.2237	-0.0278296	-0.00260859	0.0127458
16.2338	-0.00315001	-0.0140309	-0.0347069
16.2439	0.0184164	-0.0154892	-0.0333458
16.2539	-0.0153611	-0.00449633	0.0359026
16.264	-0.003027	-0.0134161	0.0410957
16.2741	-0.00109973	-0.00530696	-0.0107933
16.2842	-0.000897047	-0.0115563	-0.0424481
16.2942	-0.0214008	-0.00257744	0.00257345
16.3043	-0.0182691	-0.00197561	0.00690081
16.3144	-0.00448702	0.013824	-0.0400861
16.3244	-0.00951927	0.0324311	-0.0921227
16.3345	-0.0117289	-0.00407641	-0.0600368
16.3446	-0.00765212	-0.00706046	0.000141306
16.3547	-0.00545236	0.00556517	0.00232173
16.3647	0.0041172	0.0152916	-0.0155623
16.3748	-0.00335742	0.024194	0.0368058
16.3849	-0.0163558	0.0101471	0.0396599
16.3949	0.00683945	0.00664403	-0.0359458
16.405	0.0199181	0.00423949	-0.0443208
16.4151	-0.0297931	0.0031624	-0.00310413
16.4251	-0.0181946	-0.0103049	0.010693
16.4352	0.0104326	0.0163125	-0.0193782
16.4453	0.0341771	0.00888754	0.0167892
16.4554	0.0145409	-0.0158562	0.0513702
16.4654	-0.00984061	0.00412338	0.030852
16.4755	-0.00504732	-0.0028746	-0.00139985
16.4856	-0.009104	0.0312955	-0.0182249
16.4956	-0.0322035	0.00345385	0.0144344
16.5057	-0.042165	-0.0194288	-0.00947049
16.5158	0.0144934	-0.0243061	-0.052815
16.5259	0.0380404	-0.0174954	-0.0264575
16.5359	0.0316194	-0.00946404	-0.0111475
16.546	0.0105655	0.00593721	-0.033771
16.5561	-0.021566	0.0357884	0.0353868
16.5661	-0.0385301	0.00941095	0.0423649
16.5762	0.00264192	-0.00967292	-0.0154614
16.5863	0.0325075	-0.0144747	0.031326
16.5963	-0.00636745	-0.0123033	0.0513032
16.6064	-0.0259092	0.00131201	-0.0192809
16.6165	0.0138601	-0.0157582	-0.0184087
16.6266	0.0149334	-0.0175086	0.0152538
16.6366	0.00907956	-0.0212582	-0.011387
16.6467	0.0214907	-0.000654822	0.0133783
16.6568	0.027051	-0.00748689	0.006496
16.6668	0.0294377	-0.0318972	-0.0170039
16.6769	0.0395152	-0.000674218	-0.0582812
16.687	-0.014555	-0.0230554	0.0457497
16.6971	-0.0429596	-0.0241356	-0.0251926
16.7071	0.0055402	-0.00495229	-0.0215816
16.7172	-0.000540334	0.00257313	-0.0794188
16.7273	0.0271165	-0.0150481	0.0418045
16.7373	0.0384315	0.00660653	0.041399
16.7474	-0.0397308	0.0375078	-0.00165588
16.7575	-0.0321538	-0.0301323	0.078945
16.7675	-0.0232948	-0.03953	0.0137929
16.7776	0.0184012	0.0100015	0.0024724
16.7877	-0.0447761	0.0173881	0.0131537
16.7978	0.00165049	-0.0153867	0.0427546
16.8078	0.0171477	-0.0136617	0.0362366
16.8179	-0.0428247	0.0113937	0.0176322
16.828	-0.0100238	-0.041676	-0.00611575
16.838	0.0215261	0.0199083	-0.0484656
16.8481	0.0249694	0.0478163	0.0888551
16.8582	-0.0616902	-0.0334983	0.050607
16.8683	-0.0181009	-0.0442414	0.0239235
16.8783	0.0104738	0.0151903	0.0901797
16.8884	-0.0759109	0.00528587	0.013414
16.8985	0.016415	-0.0191605	-0.0404498
16.9085	0.052192	0.0328698	-0.039643
16.9186	0.00386274	-0.0164947	-0.0950509
16.9287	0.0109533	-0.0353725	-0.137612
16.9387	0.0150531	-0.0450342	0.0508575
16.9488	0.00720525	-0.0174802	-0.050377
16.9589	-0.00871451	-0.00632959	-0.0500811
16.969	-0.0161657	0.0199574	0.0125454
16.979	-0.0464288	0.01681	0.0886744
16.9891	-0.0370192	-0.00641825	0.0615612
16.9992	0.0371486	0.0294657	-0.0302811
17.0092	0.0374791	0.0235709	0.00182218
17.0193	0.0205976	-0.0171599	0.0611305
17.0294	-0.00385227	-0.00924599	0.0301666
17.0395	0.00714382	-0.000264188	0.0398965
17.0495	-0.00334455	0.00188147	0.0378606
17.0596	-0.0181818	0.0413346	0.03355
17.0697	0.0044564	0.0354538	0.0239433
17.0797	-0.0146993	0.00846991	0.0550001
17.0898	0.050419	0.0161843	0.0146448
17.0999	0.025007	0.0611452	0.0446924
17.1099	0.00223451	0.00399435	0.096742
17.12	-0.0162504	-0.0219525	0.131258
17.1301	-0.0173098	-0.00696008	0.0406519
17.1402	-0.034559	-0.00853879	0.0334032
17.1502	-0.013402	-0.0395822	0.0325471
17.1603	0.0275149	-0.00223593	0.0294624
17.1704	0.0207023	0.0173949	-0.0203453
17.1804	-0.0125234	-0.0134197	-0.0415894
17.1905	-0.0115848	-0.0243368	-0.0330337
17.2006	0.0034069	-0.00961923	-0.0658909
17.2107	0.0250513	-0.00246991	-0.0792479
17.2207	-0.00454332	0.0127819	0.00367739
17.2308	-0.00281185	0.0136448	-0.0266331
17.2409	0.0101957	-0.00946375	-0.011015
17.2509	0.000574397	-0.00116959	-0.012365
17.261	-0.0228105	0.00340158	0.0175498
17.2711	-0.0035777	-0.00221993	0.0527135
17.2811	-0.0118719	0.0118883	-0.0287153
17.2912	-0.0104616	0.0302235	-0.0485599
17.3013	-0.000338715	0.0267694	0.0592044
17.3114	0.00406203	0.0167237	0.0880656
17.3214	-0.0138152	-0.00183614	0.0387713
17.3315	-0.0321197	-0.0175881	0.024145
17.3416	-0.0272463	-0.0243828	0.0181398
17.3516	-0.0225409	-0.0209233	0.0481912
17.3617	-0.0265484	0.0218278	0.0436664
17.3718	-0.0161059	0.00343734	0.0521268
17.3819	-0.00154371	-0.00329504	0.0640207
17.3919	-0.0111668	0.0255411	-0.00927498
17.402	0.0186997	0.00522918	-0.0528158
17.4121	0.0379459	0.018197	0.0279262
17.4221	-0.0192392	0.0236884	-0.0136915
17.4322	-0.0244074	-0.0197546	-0.0148579
17.4423	-0.0173839	-0.0140182	0.0499855
17.4523	-0.0462187	0.00317794	0.0558083
17.4624	-0.0274158	0.0095103	0.0251782
17.4725	0.00985005	0.0418288	0.0117605
17.4826	-0.00828889	0.0100151	0.0281283
17.4926	-0.00776654	-0.0202874	0.0182057
17.5027	0.0273472	-0.00673582	-0.0286732
17.5128	0.035285	0.0154375	-0.0695548
17.5228	-0.00133312	0.00497273	0.000556296
17.5329	-0.0115537	-0.0263197	0.0145157
17.543	-0.0110934	0.00909963	0.000338475
17.5531	0.00526633	0.0277043	0.0405441
17.5631	0.00857963	0.0133201	0.0646828
17.5732	0.0183472	0.00621477	0.0266122
17.5833	-0.0199048	-0.0175526	0.0288253
17.5933	-0.00983246	-0.0111987	0.0317257
17.6034	-0.00375812	0.0128254	0.0203904
17.6135	-0.0184359	0.00445567	-0.0409015
17.6236	-0.00766219	-0.00339477	0.012004
17.6336	-0.0053115	0.0099955	-0.0260015
17.6437	-0.0226143	0.0167945	-0.0141865
17.6538	-0.000946274	-0.0168875	0.0410863
17.6638	-0.00146466	-0.00953822	0.0658271
17.6739	-0.00610303	-0.00214263	0.106102
17.684	-0.00477531	-0.0128282	0.0343938
17.694	0.0562904	0.00116017	-0.0505126
17.7041	-0.000868881	-0.00592334	-0.0340846
17.7142	-0.00115878	-0.0164549	-0.00682209
17.7243	0.00868313	0.003318	-0.0435082
17.7343	0.0417184	-0.0178479	-0.109994
17.7444	0.0319375	-0.0269743	-0.0390735
17.7545	0.0391092	0.00276392	-0.0340243
17.7645	0.00593677	0.0285505	-0.0768411
17.7746	-0.0183092	0.0235454	-0.000424893
17.7847	0.0272843	-0.0428607	-0.0239528
17.7948	-0.00672702	0.0165728	-0.0138037
17.8048	0.0012997	0.0204494	-0.0721655
17.8149	0.0135227	-0.00168976	-0.122088
17.825	0.0430494	0.0115565	-0.0474378
17.835	-0.0186711	0.0239639	-0.0517047
17.8451	0.00110568	-0.046926	-0.0771956
17.8552	0.0525904	0.0372288	0.0143644
17.8652	-5.04038e-05	0.0438083	0.00738412
17.8753	-0.0321679	-0.00916685	0.0115589
17.8854	0.0626831	-0.0598834	0.0140408
17.8955	0.0031462	-0.030125	0.0305769
17.9055	-0.0474182	0.0368346	0.0283456
17.9156	0.00707429	-0.00805241	0.0324628
17.9257	-0.019579	0.02691	-0.0382177
17.9357	-0.0549446	0.00321788	-0.0324967
17.9458	0.0274572	-0.00991494	0.0100904
17.9559	0.0545006	0.0106438	0.0271503
17.966	-0.00518646	0.0068039	-0.0506222
17.976	0.0256724	-0.017864	-0.0170355
17.9861	0.0137765	0.0153905	-0.0229376
17.9962	-0.0216023	0.00982685	-0.0713499
18.0062	-0.00108778	-0.0178771	-0.0902357
18.0163	-0.0131046	0.042752	-0.0687919
18.0264	-0.0198721	0.00618292	-0.101058
18.0364	0.0122707	-0.0268613	-0.0757676
18.0465	0.0281174	-0.00619452	-0.0901797
18.0566	0.00819798	0.00139557	0.00150312
18.0667	0.000775801	-0.026735	-0.00717025
18.0767	0.00557624	-0.0172374	0.046657
18.0868	-0.000410944	0.010998	0.0413266
18.0969	-0.044972	-0.0350614	-0.0224289
18.1069	-0.0227603	-0.0352529	-0.030886
18.117	0.00746253	-0.0203382	-0.0409294
18.1271	-0.0374485	-0.013068	-0.00992603
18.1372	0.00838464	0.0258946	-0.0375463
18.1472	0.0320623	0.0275039	-0.0460924
18.1573	0.0101624	-0.0264135	0.0262945
18.1674	0.0214658	-0.0090113	-0.000667837
18.1774	0.0577786	0.0153642	-0.0362508
18.1875	0.0235045	0.00465978	-0.0219828
18.1976	0.0230595	-0.00905054	0.0236577
18.2076	-0.0261371	0.0191245	0.0626764
18.2177	-0.0546273	0.0194218	0.0224416
18.2278	-0.0225858	0.00883964	0.0292653
18.2379	0.00011764	-0.00844108	0.0638452
18.2479	0.012842	-0.0131943	0.0449435
18.258	-0.0222238	-0.01308	-0.0411116
18.2681	-0.00911749	-0.00876943	-0.0254971
18.2781	0.0103367	-0.0106234	-0.0183967
18.2882	0.0144865	0.00774052	-0.0465436
18.2983	-0.000742115	-0.00368064	-0.0423264
18.3084	-0.0361274	0.00224745	-0.0110552
18.3184	-0.00737981	0.00918265	0.0188889
18.3285	0.0273189	0.0126846	0.00899247
18.3386	-0.00913392	0.0173616	-0.0030247
18.3486	-0.019494	-0.00600704	-0.0539516
18.3587	-0.0051042	-0.0076014	-0.0696153
18.3688	0.00396048	0.00769572	-0.0466438
18.3788	0.00644883	0.000837131	-0.0260068
18.3889	0.00883055	-0.00545687	-0.00790275
18.399	-0.000170584	0.0213912	0.0347679
18.4091	-0.00538736	0.0105806	0.0141755
18.4191	0.0539406	-0.0122538	-0.0457845
18.4292	0.0464049	0.00585099	-0.0233169
18.4393	-0.00356529	0.0275721	0.0246327
18.4493	-0.00981891	0.0205153	0.00139984
18.4594	-0.00909909	-0.0012968	-0.0111522
18.4695	-0.00110065	0.00276998	0.0191421
18.4796	-0.00396625	-0.0112906	-0.0048395
18.4896	-0.00713684	-0.00600316	0.00461044
18.4997	-0.00167075	0.009584	0.0575931
18.5098	-0.00455101	-0.0139676	0.10316
18.5198	-0.00810245	-0.0139901	0.077116
18.5299	-0.00855613	-0.00224821	0.0302283
18.54	0.00792763	0.00793732	-0.0151189
18.55	0.0161108	0.00854034	0.00549678
18.5601	-0.0261817	0.03194	0.0376931
18.5702	-0.0347369	0.00674038	0.038181
18.5803	0.00317116	0.00517662	-0.0345131
18.5903	-0.0169191	0.00597796	-0.0385741
18.6004	0.0216455	-0.00289478	0.00484924
18.6105	0.0338739	0.0117157	0.0126272
18.6205	3.62722e-05	0.0259294	-0.045346
18.6306	0.0163851	0.0405399	-0.0539885
18.6407	0.016865	-0.00820407	0.0373128
18.6508	-0.00334553	-0.0356468	0.0892912
18.6608	0.0113258	-0.041117	0.0389585
18.6709	0.0488703	0.0030801	0.0577468
18.681	-0.0060376	0.0212915	0.0864675
18.691	-0.057222	0.0201242	0.0481704
18.7011	0.00807942	0.0432183	0.0432889
18.7112	0.00712771	0.0100076	0.0663449
18.7212	0.0169644	-0.00930252	-0.0174574
18.7313	0.0253519	-0.00566345	-0.0419959
18.7414	-0.002347	0.028371	0.00966658
18.7515	-0.0229043	-0.0101347	-0.0454988
18.7615	0.00533637	-0.0266374	0.0211911
18.7716	-0.00374531	0.00379582	0.0250593
18.7817	-0.0149321	-0.0258143	-0.00577216
18.7917	0.00581821	-0.0204666	0.0415352
18.8018	0.0343054	0.0246606	0.0160265
18.8119	-0.050549	0.0441072	-0.0248339
18.822	0.032398	-0.00428676	-0.0595004
18.832	0.0748946	-0.00269311	-0.0866
18.8421	0.059668	-0.0122079	-0.00658422
18.8522	-0.0416631	-0.0134221	-0.0550639
18.8622	-0.0149114	0.0302549	-0.0218799
18.8723	-0.0269772	0.0143768	-0.00952536
18.8824	0.00967893	0.0284057	-0.00217702
18.8924	-0.0214436	0.0205077	0.0297519
18.9025	-0.00738406	-0.0211276	0.0361364
18.9126	0.000221803	0.0325585	0.0224543
18.9227	-0.0763999	0.0156878	0.0615969
18.9327	-0.033392	0.0223613	0.0647885
18.9428	-0.0232812	-0.0536984	0.00764566
18.9529	-0.0184185	-0.0391822	0.104493
18.9629	-0.00952663	-0.0145344	0.0267179
18.973	-0.037911	0.039349	0.0305149
18.9831	0.032094	-0.0370776	-0.000921772
18.9932	0.0422703	0.022787	-0.0344807
19.0032	-0.0322234	0.0218146	-0.0144214
19.0133	-0.0246698	-0.0628828	0.016455
19.0234	-0.0120799	0.00650267	0.00756602
19.0334	0.00167057	0.0121063	-0.0160031
19.0435	-0.0335434	-0.000341347	0.00901058
19.0536	0.0259241	-0.0100579	-0.041462
19.0636	0.028569	0.0310066	-0.0341965
19.0737	-0.0315141	0.0045662	-0.0415805
19.0838	-0.0194681	0.00827692	0.0781705
19.0939	0.0159399	-0.0102445	0.0386648
19.1039	0.00908204	-0.0217318	-0.00230683
19.114	0.0339175	-0.00984286	-0.0211084
19.1241	0.0505445	0.0258497	-0.0451141
19.1341	-0.0232816	-0.00361286	0.00389244
19.1442	0.0312651	-0.0406133	0.00323088
19.1543	0.079648	-0.0103991	-0.0221812
19.1644	0.0157119	0.00803537	0.0178966
19.1744	0.0246066	-0.0209698	0.0392206
19.1845	0.00841667	0.00863386	0.0497407
19.1946	-0.0355894	-0.00975136	0.00154452
19.2046	-0.0229237	-0.0406488	-0.0363678
19.2147	-0.00883833	0.0296956	-0.0559549
19.2248	0.0126024	-0.00362815	-0.042965
19.2348	0.0106824	-0.0134534	-0.0195538
19.2449	0.0229995	0.0071931	-0.00308565
19.255	0.00980432	0.0261306	0.00408963
19.2651	0.0138978	0.00155009	-0.007763
19.2751	0.0280778	-0.0174915	0.0582039
19.2852	0.00598809	-0.0047643	0.0270944
19.2953	-0.0322603	-0.00981356	-0.017748
19.3053	-0.00863408	-0.0432136	0.0625162
19.3154	0.0216147	-0.0275414	0.0186962
19.3255	-0.0320442	-0.0156533	0.000511063
19.3356	-0.0166111	-0.0069695	0.0238147
19.3456	0.0159424	-0.00527417	-0.000641461
19.3557	0.00500859	0.00609527	-0.0124783
19.3658	0.00428302	-0.00923805	-0.0243301
19.3758	-0.000913288	-0.0208482	-0.0360289
19.3859	0.01362	-0.00976843	-0.0387094
19.396	-0.0188283	-0.00470055	-0.0546951
19.406	-0.0127636	-0.0144641	-0.0354021
19.4161	0.0118557	0.00664091	-0.0174818
19.4262	0.0111607	0.00998481	0.0325892
19.4363	-0.00613586	0.00478391	0.040394
19.4463	-0.030299	-0.00175966	0.0265625
19.4564	-0.0165137	-0.0157494	-0.00296977
19.4665	-0.011655	-0.00251742	0.0306088
19.4765	-0.0121217	-0.00608521	0.045374
19.4866	-0.00964361	-0.0397127	-0.0272015
19.4967	-0.00162678	-0.0243136	-0.0331871
19.5068	0.00303294	0.00309423	0.0145235
19.5168	-0.0101603	0.0152739	-0.0280209
19.5269	-0.000450291	0.00697645	-0.0739523
19.537	0.0201695	0.0269383	-0.073527
19.547	0.00581607	0.0029398	-0.0301021
19.5571	0.000281988	-0.0415206	0.0300164
19.5672	-0.00769367	-0.00576562	0.0502641
19.5772	-0.0297076	-0.0128114	0.0361037
19.5873	-0.0311375	-0.006353	0.0125899
19.5974	-0.0109307	0.016234	0.00892806
19.6075	-0.0165266	0.00970725	0.0711385
19.6175	-0.0172398	-0.00467764	0.0732905
19.6276	0.01525	-0.00648926	0.0409273
19.6377	0.0122631	0.00793449	-0.0167655
19.6477	0.0166614	-0.0311084	-0.0264696
19.6578	0.0326564	-0.0392829	0.0345506
19.6679	0.0404727	-0.00335946	0.00717647
19.678	0.0233104	0.00779895	-0.0505629
19.688	0.0192402	-0.0151308	0.0240366
19.6981	-0.00196554	0.0179239	0.0813016
19.7082	-0.020867	0.019225	-0.00404236
19.7182	-0.00301001	-0.00715341	-0.0616618
19.7283	-0.00132709	0.00211254	-0.0029034
19.7384	-0.00847877	0.0109053	-0.0278096
19.7484	-0.00450656	0.00459172	0.0253166
19.7585	0.00463864	0.0100272	0.0516474
19.7686	-0.0295202	-0.0165353	-0.00928779
19.7787	-0.0307656	-0.0525737	0.00971657
19.7887	0.00436629	0.00525954	0.0432308
19.7988	-0.0298373	0.0350315	-0.00264763
19.8089	-0.0203699	0.0203543	-0.0611464
19.8189	0.0375903	-0.00930745	-0.0603816
19.829	0.0250555	0.00227474	-0.0545371
19.8391	0.0192807	-0.0299973	-0.0662875
19.8492	0.0065331	0.00413621	-0.04328
19.8592	-0.0289648	0.0393677	0.00876331
19.8693	-0.0268342	0.000501966	-0.0298779
19.8794	0.00628745	-0.0345956	-0.0739224
19.8894	-0.00333025	-0.0138012	-0.0127594
19.8995	0.00429491	0.0697822	0.0526285
19.9096	0.0117374	0.00103647	0.0530276
19.9196	0.00328065	0.0136037	-0.0215719
19.9297	-0.0562315	-0.00350849	0.0126219
19.9398	0.000604725	-0.0250163	0.0121003
19.9499	0.00987974	0.0320726	0.0397142
19.9599	-0.00393147	-0.00144625	0.031041
19.97	0.00773971	0.0216741	-0.0425293
[truncated: 10,948 more rows]
