# Supplementary material for: A corticostriatal deficit promotes temporal distortion of automatic action in ageing
Source: eLife journal article supplement (doi:10.7554/elife.29908), 2017-10-23
Supplement: supp [file elife-29908-supp-v1.zip › elife_poa_e29908_Figure_1_source_data_3.xlsx]

## Sheet: Sheet1
\Experiment code: JBG009
\Experiment description: 8 Aged (B5-B8, R5-R8; 20-22 months old) and 8 Young (B1-B4, R1-R4; 2-3 months old) mice (C57-Bl6) were submitted to 6 days of magazine training. Pellets were delivered randomly (every second has a random probability of being reinforced of 1.11%). Sessions finished with the delivery of the 20th pellet (average session length: 30 mins)
\Data type and description: event-time stamp data. The time at which each event occurred (Y matrix, values 4 and 5) was stamped with a 10 ms resolution (Z matrix, centiseconds). Y matrix: 3=delivered pellet; 4=Magazine entry (time-controlled; consecutive entries within 200ms are not repeatedly stamped). Data were obtained through MED STATE NOTATION (MED Associates)
\Authors: J Bertran-Gonzalez (ORCID: 0000-0002-3794-1782)
DAY 1																																					DAY 2
Y Matrix (event stamp)																		Z Matrix (time stamp)																			Y Matrix (event stamp)
Subject	B1	B3	R1	R3	B2	B4	R2	R4	B5	B7	R5	R7	B6	B8	R6	R8		Subject	B1	B3	R1	R3	B2	B4	R2	R4	B5	B7	R5	R7	B6	B8	R6	R8			Subject	B1	B3	R1	R3	B2	B4	R2	R4	B5	B7	R5	R7
Start Date	10/23/13	10/23/13	10/23/13	10/23/13	10/23/13	10/23/13	10/23/13	10/23/13	10/23/13	10/23/13	10/23/13	10/23/13	10/23/13	10/23/13	10/23/13	10/23/13		Start Date	10/23/13	10/23/13	10/23/13	10/23/13	10/23/13	10/23/13	10/23/13	10/23/13	10/23/13	10/23/13	10/23/13	10/23/13	10/23/13	10/23/13	10/23/13	10/23/13			Start Date	10/24/13	10/24/13	10/24/13	10/24/13	10/24/13	10/24/13	10/24/13	10/24/13	10/24/13	10/24/13	10/24/13	10/24/13
Start Time	09:46:11	10:46:34	09:46:11	10:46:34	09:46:11	10:46:34	09:46:11	10:46:34	09:46:11	10:46:34	09:46:11	10:46:34	09:46:11	10:46:34	09:46:11	10:46:34		Start Time	09:46:11	10:46:34	09:46:11	10:46:34	09:46:11	10:46:34	09:46:11	10:46:34	09:46:11	10:46:34	09:46:11	10:46:34	09:46:11	10:46:34	09:46:11	10:46:34			Start Time	14:34:06	15:36:19	14:34:06	15:36:19	14:34:06	15:36:19	14:34:06	15:36:19	14:34:06	15:36:19	14:34:06	15:36:20
Experiment	JBG009	JBG009	JBG009	JBG009	JBG009	JBG009	JBG009	JBG009	JBG009	JBG009	JBG009	JBG009	JBG009	JBG009	JBG009	JBG009		Experiment	JBG009	JBG009	JBG009	JBG009	JBG009	JBG009	JBG009	JBG009	JBG009	JBG009	JBG009	JBG009	JBG009	JBG009	JBG009	JBG009			Experiment	JBG009	JBG009	JBG009	JBG009	JBG009	JBG009	JBG009	JBG009	JBG009	JBG009	JBG009	JBG009
Box	1	1	2	2	3	3	4	4	5	5	6	6	7	7	8	8		Box	1	1	2	2	3	3	4	4	5	5	6	6	7	7	8	8			Box	1	1	2	2	3	3	4	4	5	5	6	6
Magazine Entries (4)	41	64	62	42	28	61	68	90	85	33	57	73	35	19	23	49		Magazine Entries (4)	41	64	62	42	28	61	68	90	85	33	57	73	35	19	23	49			Magazine Entries (4)	87	25	100	124	86	74	169	55	67	157	91	149
Delivered Pellets (3)	20	20	20	20	20	20	20	20	20	20	20	20	20	20	20	20		Delivered Pellets (3)	20	20	20	20	20	20	20	20	20	20	20	20	20	20	20	20			Delivered Pellets (3)	20	20	20	20	20	20	20	20	20	20	20	20
Raw Mag Entries	41	64	63	42	28	61	69	90	86	33	57	73	35	19	23	49		Raw Mag Entries	41	64	63	42	28	61	69	90	86	33	57	73	35	19	23	49			Raw Mag Entries	87	26	100	124	86	74	169	55	67	157	91	149
Time (centiseconds)	121620	169520	164320	156420	167920	210520	173020	213320	168720	263120	188220	208020	209120	113920	138820	145120		Time (centiseconds)	121620	169520	164320	156420	167920	210520	173020	213320	168720	263120	188220	208020	209120	113920	138820	145120			Time (centiseconds)	187820	105820	123620	195720	175420	217920	193020	124920	146620	210720	247620	194520
# of Stamped Events	61	84	82	62	48	81	88	110	105	53	77	93	55	39	43	69		# of Stamped Events	61	84	82	62	48	81	88	110	105	53	77	93	55	39	43	69			# of Stamped Events	107	45	120	144	106	94	189	75	87	177	111	169
Y(1)	3	3	4	4	4	4	4	4	4	4	4	4	4	3	4	4		Z(1)	9.11	5.11	49.79	0.94	23.94	2.03	22.34	29.13	30.41	28.14	10.67	31.69	68.91	5.11	11.96	9.43			Y(1)	4	4	4	3	4	3	4	3	3	4	4	4
Y(2)	4	4	4	4	4	4	4	4	4	4	3	4	4	3	3	4		Z(2)	25.71	20.58	59.87	2.28	53.26	5.46	23.03	61.63	30.77	37.11	18.11	32.44	69.16	6.32	42.11	10.33			Y(2)	4	4	3	4	3	4	4	4	3	3	3	4
Y(3)	4	4	3	4	4	4	4	4	4	4	4	4	4	4	4	3		Z(3)	26.91	21.14	103.11	42.32	53.53	6.16	23.21	61.93	30.87	38.04	30.22	32.62	69.21	57.25	72.36	47.11			Y(3)	3	4	4	4	3	4	4	4	4	4	4	4
Y(4)	4	4	4	4	3	3	4	4	4	4	4	4	4	4	3	3		Z(4)	27.16	26.61	107.93	62.7	100.11	17.11	23.37	62.27	30.9	38.53	30.37	32.88	69.53	57.55	215.32	170.32			Y(4)	3	3	4	4	4	4	3	4	3	4	4	4
Y(5)	4	4	3	4	4	4	4	4	4	3	4	4	3	3	3	3		Z(5)	27.54	28.04	171.32	100.58	132.56	20.43	23.53	95.68	103.76	152.11	40.83	33.3	79.11	118.53	278.53	219.53			Y(5)	4	4	4	4	4	3	4	4	4	4	3	4
Y(6)	4	4	4	3	3	4	4	4	4	4	4	4	4	3	4	4		Z(6)	37.26	28.1	178.31	118.11	138.32	20.67	23.56	134.54	123.08	160.77	52.77	73.87	150.3	136.74	330	304.66			Y(6)	4	3	4	4	4	4	4	4	4	4	4	4
Y(7)	4	4	4	4	3	4	4	4	4	4	4	4	4	3	4	4		Z(7)	37.74	28.42	231.28	123.04	148.53	31.25	23.65	142.36	129.86	163.4	52.8	81.01	211.84	184.95	359.16	305.08			Y(7)	3	4	4	4	4	4	4	4	4	4	4	4
Y(8)	4	4	4	4	4	4	4	3	4	3	4	4	3	3	4	4		Z(8)	69.42	30.03	231.66	171.04	158.05	31.81	23.88	146.11	206.08	243.32	66.41	96.97	239.32	205.16	359.53	306.05			Y(8)	4	3	3	4	4	4	4	3	4	4	4	4
Y(9)	4	4	4	4	3	4	4	4	4	4	4	3	4	4	4	4		Z(9)	92.02	31.34	231.91	179.49	179.74	44.67	24.04	162.29	206.37	267.98	74.38	194.11	252.07	217.58	359.59	306.33			Y(9)	3	4	4	4	4	4	4	4	3	4	4	3
Y(10)	3	4	4	4	4	4	4	4	4	4	3	4	4	4	3	4		Z(10)	99.32	44.57	254.38	181.57	221.74	78.99	55.44	168.33	206.47	268.02	231.32	205.81	353.14	217.6	367.74	307.64			Y(10)	4	4	3	4	4	4	4	4	4	4	4	4
Y(11)	4	4	4	4	4	4	4	4	4	3	4	4	4	4	3	4		Z(11)	133.4	52.99	254.69	181.7	274.45	79.22	56.72	170.44	208.91	287.53	247.88	313.19	353.39	218.02	396.95	310.4			Y(11)	4	4	4	4	3	3	4	4	4	4	4	4
Y(12)	3	4	4	4	4	4	4	4	4	3	4	4	3	3	4	3		Z(12)	142.53	53.24	257.94	181.73	276.66	132.86	61.1	197.99	284.8	334.74	248.04	313.44	354.53	327.37	430.34	347.74			Y(12)	4	3	3	4	4	4	3	4	3	4	4	4
Y(13)	4	4	4	4	3	4	4	4	3	4	4	4	3	3	4	3		Z(13)	149.83	53.73	258.18	191.74	357.95	191.35	104.25	212.45	286.11	400.94	282.49	313.89	358.74	363.58	432.37	391.95			Y(13)	4	4	4	4	4	4	4	4	4	3	3	4
Y(14)	4	4	4	3	4	4	3	4	4	4	4	4	4	3	4	4		Z(14)	153.69	68.34	304.76	261.32	383.14	191.53	134.11	215.87	309.97	582.62	283.04	314.19	501.02	382.79	432.87	430.5			Y(14)	4	4	4	4	4	4	4	4	3	3	4	4
Y(15)	4	4	4	4	4	4	4	4	4	4	4	4	4	4	3	4		Z(15)	153.84	81.93	321.04	272.1	385.69	220.26	150.21	216.89	310.56	649.34	283.57	365.64	501.44	441.92	477.16	512.23			Y(15)	4	4	4	4	4	4	4	4	4	4	4	4
Y(16)	4	4	4	4	3	4	3	4	3	4	3	4	4	4	3	4		Z(16)	157.28	82.29	322.29	273.62	393.16	220.4	177.32	218.57	357.32	711.43	310.53	367.9	502.63	442.29	540.37	512.92			Y(16)	4	4	4	4	4	4	4	4	4	4	3	4
Y(17)	4	4	4	4	4	4	3	4	4	3	4	4	4	4	3	4		Z(17)	159.31	82.4	322.57	273.94	436.82	223.22	185.53	238.17	362.71	728.95	320.76	368.88	548.12	442.49	595.58	513.39			Y(17)	3	3	4	4	4	4	3	4	3	3	4	4
Y(18)	4	4	4	4	3	4	4	4	4	3	4	4	3	3	3	4		Z(18)	159.4	83.01	326.18	276.13	439.37	223.55	190.18	245.87	362.92	730.16	320.93	437.97	680.95	477	626.79	514.48			Y(18)	4	4	4	4	3	4	4	4	4	4	4	4
Y(19)	3	4	4	3	3	4	4	4	4	3	4	3	4	3	3	4		Z(19)	159.74	83.25	326.21	305.53	477.58	224.93	192.32	246.56	384.94	787.37	324.51	475.32	716.46	485.21	679	514.51			Y(19)	4	4	3	4	4	4	4	4	4	4	3	4
Y(20)	3	4	3	3	3	3	4	4	4	4	3	4	4	3	3	4		Z(20)	188.95	84.62	344.53	328.74	501.79	228.32	210.6	265.67	388.42	819.39	368.74	487.47	914.92	512.42	708.21	514.56			Y(20)	4	4	4	4	4	4	4	4	4	4	4	3
Y(21)	4	4	3	3	3	4	3	4	4	3	4	4	4	3	3	4		Z(21)	266.98	141.42	345.74	335.95	540	258.36	217.74	266.3	388.73	861.58	501.45	531.2	915.33	513.63	766.42	514.6			Y(21)	4	3	4	3	4	4	4	4	4	4	3	4
Y(22)	3	4	4	4	4	4	4	4	4	4	4	4	4	3	3	4		Z(22)	276.16	147.05	350.59	508.31	544.01	262.19	241.91	266.35	388.98	893.38	502.78	531.72	915.55	536.84	782.63	514.63			Y(22)	4	4	4	4	4	4	4	3	4	4	4	3
Y(23)	3	4	4	3	4	4	4	4	4	4	4	4	4	3	4	4		Z(23)	365.37	160.52	380.12	546.16	544.29	296.23	243.26	270.26	392.83	894.85	502.89	540.72	915.67	546.05	874.94	516.65			Y(23)	4	3	3	4	3	4	4	4	4	4	4	4
Y(24)	4	3	4	4	4	4	4	4	4	4	4	4	4	3	4	4		Z(24)	374.91	208.32	381.7	572.23	544.45	296.98	243.78	271.01	393.52	894.96	549.08	543.22	918.67	626.26	879.14	616.2			Y(24)	4	3	4	4	4	4	4	4	4	3	4	4
Y(25)	4	4	4	3	4	3	4	4	4	4	4	4	3	4	4	3		Z(25)	380.71	212.21	385.88	663.37	550.44	311.53	247.13	332.53	393.59	996.16	549.65	543.48	1066.16	871.75	879.25	655.16			Y(25)	4	3	4	4	3	4	3	4	4	4	4	4
Y(26)	4	3	4	4	4	3	3	4	4	4	3	3	3	4	4	4		Z(26)	413.92	249.53	387.18	726.04	553.05	336.74	264.95	341.41	393.69	996.78	620.95	581.53	1082.37	872.18	880.44	698.18			Y(26)	3	3	4	3	4	4	3	4	4	4	4	4
Y(27)	4	4	3	4	3	4	4	4	4	4	3	4	3	4	4	3		Z(27)	419.2	264.17	422.95	730.37	840.21	363.1	301.02	342.64	393.79	998.52	670.16	586.75	1219.58	872.27	954.46	699.37			Y(27)	4	4	3	4	4	4	4	4	4	4	4	4
Y(28)	4	4	4	3	3	3	4	4	3	3	4	4	4	4	4	4		Z(28)	497.72	265.5	425.16	772.58	884.42	413.95	339.84	359.74	403.53	1059.79	701.69	622.6	1268.66	875.2	954.66	739.53			Y(28)	4	4	4	4	4	4	4	4	4	4	4	4
Y(29)	3	4	4	3	3	4	4	4	4	4	3	4	3	4	4	4		Z(29)	506.58	268.22	425.2	775.79	977.63	420.26	340.65	366.74	411.69	1125.44	722.37	635.14	1278.79	883.96	954.77	742.31			Y(29)	4	3	4	4	4	3	3	4	4	4	4	4
Y(30)	3	4	4	3	4	4	3	4	4	3	4	4	4	4	3	4		Z(30)	527.79	269.66	425.69	794	1020.6	425.89	345.16	368.29	460.73	1176	729.71	642.08	1424.95	889.1	988.84	744.07			Y(30)	4	4	4	4	3	4	3	4	4	4	4	4
Y(31)	4	4	3	3	4	4	3	4	4	3	4	4	3	3	3	4		Z(31)	531.19	298.93	445.16	859.21	1020.78	426.15	423.37	371.67	464.71	1240.21	732.84	643.36	1468	915.47	1029.05	760.98			Y(31)	4	3	4	4	3	4	4	4	3	4	4	4
Y(32)	4	4	4	3	3	4	3	4	4	4	4	4	4	3	3	4		Z(32)	531.55	316.26	458.02	885.42	1071.84	481.1	440.58	389.21	493.05	1379.93	733.26	643.5	1501.69	1009.68	1054.26	844.22			Y(32)	4	3	4	4	4	3	4	4	4	4	4	4
Y(33)	4	4	4	4	4	4	4	4	4	4	4	4	4	3	4	3		Z(33)	531.93	316.7	459.09	890.69	1112.37	481.23	451.08	412.16	494.33	1381.55	733.81	643.6	1502.21	1016.89	1170.75	844.58			Y(33)	4	3	4	4	4	4	4	4	4	4	4	4
Y(34)	4	4	4	4	4	4	4	4	4	3	4	3	3	4	4	3		Z(34)	535.37	370.92	459.3	890.87	1113.78	524.84	452.1	412.79	494.4	1451.42	747.88	661.74	1521.21	1055.64	1204.88	850.79			Y(34)	4	4	3	4	4	4	4	4	4	3	4	3
Y(35)	4	3	3	3	4	4	4	4	4	3	3	4	3	4	4	3		Z(35)	538.74	381.74	459.37	911.63	1114.56	602.42	452.15	412.95	494.63	1565.63	782.58	682.68	1584.42	1057.79	1211.95	869			Y(35)	4	4	4	4	4	4	4	3	3	4	4	3
Y(36)	4	4	3	3	4	4	4	4	4	4	3	4	4	4	4	4		Z(36)	538.83	391.97	467.58	929.84	1114.7	602.59	464.91	413.09	533.84	1640.84	825.79	787.53	1587.63	1058.02	1215.18	876.11			Y(36)	4	3	4	4	4	4	4	4	4	4	4	4
Y(37)	3	4	3	4	4	3	3	4	4	3	3	4	4	4	4	4		Z(37)	606	394.16	493.79	958.12	1227.32	908.16	500.79	512.7	624.08	1676.84	831	788.39	1588.12	1060.33	1215.95	876.15			Y(37)	4	4	4	4	4	4	4	4	4	3	4	4
Y(38)	4	4	4	4	4	3	4	4	3	4	4	4	4	4	3	4		Z(38)	680.3	395.22	518.41	958.16	1228.99	913.37	520.11	514.09	640.74	1738.12	837.04	799.21	1588.18	1072.77	1266.47	876.27			Y(38)	4	3	4	4	4	4	4	4	4	4	4	4
Y(39)	4	4	4	4	4	4	4	4	4	3	4	4	3	3	3	4		Z(39)	681.03	513.2	661.35	962.35	1246.37	917.6	520.38	514.38	658.46	1818.05	840.08	800.15	1660.63	1139.1	1276.68	878.66			Y(39)	4	4	4	4	4	4	4	4	4	4	4	4
Y(40)	4	4	4	3	4	4	4	4	4	4	3	3	3	0	3	3		Z(40)	707.34	513.36	661.6	1021.05	1248.06	919.32	523.81	523.5	659.32	1843.49	850.21	800.95	1684.84	0	1288.89	969.21			Y(40)	4	3	4	4	4	4	4	3	4	4	4	4
Y(41)	4	4	4	4	4	3	3	4	4	3	4	4	3	0	4	4		Z(41)	709.24	540.86	662.17	1028.07	1288.27	924.58	556	524.31	681.95	1985.26	850.66	811.62	1748.05	0	1356.23	1005.23			Y(41)	4	4	4	4	4	4	4	4	3	4	4	4
Y(42)	4	4	4	4	3	3	4	4	4	3	4	4	4	0	4	3		Z(42)	709.47	542.54	670.41	1056.92	1337.05	944.79	593.56	524.56	683.74	2005.47	851.95	841.66	1755.19	0	1381.46	1027.42			Y(42)	4	4	4	4	3	4	4	3	4	4	4	4
Y(43)	4	4	3	4	3	3	4	4	3	3	4	4	4	0	3	3		Z(43)	711.7	542.59	726	1058.65	1424.26	1027	593.68	533.48	700.95	2031.68	852.5	879.84	1774.38	0	1388.1	1047.63			Y(43)	3	3	3	4	4	4	4	4	4	4	4	4
Y(44)	4	3	4	4	3	4	4	4	4	4	3	4	3	0	0	3		Z(44)	787.38	571.95	767.95	1061.95	1488.47	1029.3	707.73	534.98	705.08	2055	859.42	903.32	1775.26	0	0	1053.84			Y(44)	4	3	4	3	4	4	4	3	4	4	4	4
Y(45)	3	3	3	4	3	3	4	4	4	4	4	4	4	0	0	4		Z(45)	806.21	583.16	810.21	1062.33	1529.68	1031.21	707.97	535.15	706.39	2133.1	876.28	903.55	1819.92	0	0	1081.89			Y(45)	4	3	4	3	4	4	4	3	4	4	3	4
Y(46)	3	4	3	4	4	3	3	3	3	3	4	3	4	0	0	4		Z(46)	807.42	584.74	909.42	1162.63	1542.83	1101.42	801.21	554.32	708.16	2264.89	876.37	928.16	1859.44	0	0	1082.73			Y(46)	4	0	4	3	4	4	4	4	3	4	4	4
Y(47)	4	4	3	4	3	4	3	4	4	4	4	4	4	0	0	4		Z(47)	843.81	587.35	923.63	1182.09	1664.89	1132.59	863.42	563.77	710.6	2324.29	878.47	937.48	1861	0	0	1083.06			Y(47)	4	0	3	4	4	4	4	4	4	4	4	4
Y(48)	4	3	4	4	3	4	3	3	4	4	4	3	3	0	0	4		Z(48)	850.38	668.37	924.47	1211.79	1679.1	1132.7	952.63	576.53	714.25	2324.9	885.51	974.37	1959.47	0	0	1083.29			Y(48)	4	0	4	4	4	4	4	3	4	4	4	4
Y(49)	4	3	4	4	0	4	4	4	3	4	4	4	3	0	0	4		Z(49)	853.34	709.58	1056.13	1211.85	0	1133.23	975.04	588.76	747.37	2484.52	887.74	995.51	1976.68	0	0	1087.18			Y(49)	3	0	3	3	4	4	3	4	4	4	3	4
Y(50)	4	4	4	4	0	4	4	4	3	4	3	4	3	0	0	4		Z(50)	853.55	726.97	1058.22	1212.06	0	1133.65	996.52	596.64	758.58	2485.89	952.63	997.81	2002.89	0	0	1090.89			Y(50)	4	0	4	4	4	4	4	4	3	4	4	4
Y(51)	4	4	4	4	0	4	4	4	4	4	4	4	4	0	0	4		Z(51)	854.98	882.6	1097.89	1217.31	0	1133.68	1024.52	601.3	798.83	2498.36	956.97	998.58	2034.6	0	0	1133.05			Y(51)	4	0	4	4	4	4	4	4	4	4	3	4
Y(52)	4	4	4	4	0	4	4	3	4	4	4	4	4	0	0	4		Z(52)	856.08	886.6	1098.23	1314.12	0	1133.76	1025.24	627.74	798.95	2499.05	959.4	1067.43	2054.4	0	0	1133.75			Y(52)	4	0	4	4	3	3	4	4	3	4	4	3
Y(53)	3	4	4	4	0	4	3	4	4	3	3	4	4	0	0	4		Z(53)	900.63	886.66	1103.84	1401.8	0	1134.06	1105.84	634.04	802.45	2631.1	1031.84	1067.8	2059.63	0	0	1139.66			Y(53)	4	0	3	4	4	3	4	4	4	4	4	4
Y(54)	3	4	4	4	0	4	4	4	4	0	4	4	4	0	0	4		Z(54)	955.84	889.17	1133.44	1405.49	0	1135.99	1135.37	636.3	802.85	0	1058.93	1067.82	2059.89	0	0	1139.78			Y(54)	4	0	4	4	4	4	4	4	4	4	4	4
Y(55)	3	3	4	3	0	4	4	4	4	0	3	4	3	0	0	3		Z(55)	958.05	977.79	1133.92	1407.26	0	1136.09	1139.11	637.37	803.03	0	1094.05	1067.95	2091.1	0	0	1173.05			Y(55)	4	0	4	4	4	4	4	4	4	4	4	4
Y(56)	3	3	4	4	0	4	4	4	4	0	3	4	0	0	0	3		Z(56)	979.26	1016	1134.17	1421.26	0	1136.22	1139.6	647.22	833.48	0	1249.26	1068.5	0	0	0	1180.26			Y(56)	3	0	4	4	4	3	4	3	4	4	4	4
Y(57)	3	4	3	3	0	4	4	4	4	0	4	4	0	0	0	4		Z(57)	1021.47	1043.53	1170.84	1438.47	0	1166.35	1197.2	751.27	834.3	0	1251.92	1098.31	0	0	0	1218.15			Y(57)	4	0	4	4	4	4	4	4	4	4	4	4
Y(58)	3	4	3	3	0	4	4	3	4	0	4	4	0	0	0	4		Z(58)	1024.68	1044.73	1199.05	1453.68	0	1191.76	1241.69	764.95	837.6	0	1253.91	1166.29	0	0	0	1224.33			Y(58)	3	0	4	4	4	4	4	4	3	4	3	4
Y(59)	4	4	4	4	0	4	4	4	4	0	4	3	0	0	0	4		Z(59)	1153.94	1044.99	1211.34	1492.43	0	1192.86	1262.06	781.55	837.69	0	1254.07	1181.58	0	0	0	1225.99			Y(59)	4	0	3	4	4	4	4	3	4	4	3	4
Y(60)	3	4	4	4	0	4	3	4	4	0	4	3	0	0	0	4		Z(60)	1155.89	1061.53	1212.87	1504.02	0	1193.11	1276.05	788.38	837.78	0	1281.4	1198.79	0	0	0	1226.52			Y(60)	4	0	4	4	4	4	4	3	4	4	4	4
Y(61)	3	3	3	3	0	3	4	3	4	0	4	4	0	0	0	4		Z(61)	1216.1	1124.21	1241.26	1509.89	0	1245.63	1365.3	968.16	863.59	0	1281.51	1218.65	0	0	0	1226.76			Y(61)	4	0	4	4	4	4	4	3	4	4	4	4
Y(62)	0	4	4	3	0	3	4	4	4	0	4	4	0	0	0	4		Z(62)	0	1217.79	1262.3	1564.1	0	1260.84	1391.4	1000.87	898.55	0	1281.76	1376.48	0	0	0	1366.56			Y(62)	4	0	3	4	4	4	4	4	3	4	3	4
Y(63)	0	3	4	0	0	3	4	4	3	0	4	4	0	0	0	3		Z(63)	0	1324.42	1263.84	0	0	1323.05	1400.01	1058.62	982.79	0	1354.04	1377.12	0	0	0	1392.47			Y(63)	4	0	4	4	3	3	4	4	4	4	3	4
Y(64)	0	3	4	0	0	4	4	4	4	0	4	3	0	0	0	3		Z(64)	0	1335.63	1264.08	0	0	1364.83	1400.71	1059.41	986.56	0	1354.45	1391	0	0	0	1415.68			Y(64)	4	0	4	4	4	4	4	4	4	4	4	4
Y(65)	0	3	4	0	0	4	4	4	3	0	4	4	0	0	0	4		Z(65)	0	1349.84	1264.19	0	0	1398.69	1401.23	1059.66	993	0	1378.57	1409.38	0	0	0	1434.75			Y(65)	4	0	4	4	4	3	4	3	4	4	4	4
Y(66)	0	3	4	0	0	4	3	4	4	0	4	3	0	0	0	4		Z(66)	0	1360.05	1264.57	0	0	1430.13	1430.26	1060.63	993.51	0	1471.04	1434.21	0	0	0	1435.18			Y(66)	4	0	4	4	4	3	4	3	4	4	4	4
Y(67)	0	4	4	0	0	3	3	4	4	0	3	4	0	0	0	4		Z(67)	0	1378.36	1265.73	0	0	1485.26	1441.47	1070.43	997.6	0	1512.47	1461.76	0	0	0	1435.91			Y(67)	3	0	4	3	4	4	3	4	4	4	4	4
Y(68)	0	4	3	0	0	4	4	4	3	0	3	3	0	0	0	3		Z(68)	0	1378.48	1332.47	0	0	1501.61	1444.49	1078.81	1010.21	0	1632.68	1588.42	0	0	0	1448.89			Y(68)	4	0	4	4	4	4	4	4	3	4	3	4
Y(69)	0	4	4	0	0	3	4	4	4	0	4	4	0	0	0	3		Z(69)	0	1379.9	1349.42	0	0	1537.47	1445.83	1104.13	1030.53	0	1664.46	1594.11	0	0	0	1451.1			Y(69)	4	0	3	3	4	4	4	4	4	3	3	3
Y(70)	0	3	4	0	0	4	4	4	3	0	4	4	0	0	0	0		Z(70)	0	1455.26	1350.55	0	0	1565.69	1450.24	1158.17	1135.42	0	1683.36	1597.98	0	0	0	0			Y(70)	3	0	4	4	4	4	4	3	4	4	4	4
Y(71)	0	3	4	0	0	4	3	3	3	0	4	4	0	0	0	0		Z(71)	0	1515.47	1350.58	0	0	1566.07	1500.68	1195.37	1141.63	0	1698.38	1605.58	0	0	0	0			Y(71)	4	0	4	4	4	3	4	3	4	4	4	4
Y(72)	0	4	4	0	0	3	4	4	4	0	4	3	0	0	0	0		Z(72)	0	1611.98	1350.84	0	0	1624.68	1539.86	1203.43	1166.57	0	1707.12	1635.63	0	0	0	0			Y(72)	4	0	4	4	4	4	4	3	4	4	4	4
Y(73)	0	4	4	0	0	4	4	4	4	0	4	3	0	0	0	0		Z(73)	0	1612.89	1352.7	0	0	1795.3	1539.98	1203.57	1222.91	0	1710.32	1707.84	0	0	0	0			Y(73)	4	0	4	4	3	4	4	4	4	4	4	4
Y(74)	0	4	4	0	0	4	4	4	4	0	3	4	0	0	0	0		Z(74)	0	1613.79	1352.94	0	0	1800.14	1590.6	1203.63	1223.62	0	1737.89	1724.38	0	0	0	0			Y(74)	4	0	4	3	4	4	4	3	4	4	4	4
Y(75)	0	4	4	0	0	4	4	4	4	0	4	4	0	0	0	0		Z(75)	0	1614.07	1353.21	0	0	1801.99	1630.43	1205.27	1232.47	0	1785.68	1733.95	0	0	0	0			Y(75)	3	0	4	4	4	3	4	3	4	3	4	4
Y(76)	0	4	4	0	0	4	4	3	4	0	4	3	0	0	0	0		Z(76)	0	1614.27	1358.85	0	0	1841.07	1637.28	1318.58	1240.93	0	1870.08	1761.05	0	0	0	0			Y(76)	4	0	4	4	3	4	4	0	4	4	4	4
Y(77)	0	4	4	0	0	4	4	4	4	0	3	4	0	0	0	0		Z(77)	0	1614.41	1360.32	0	0	1841.46	1640.06	1339.26	1245.89	0	1882.1	1777.78	0	0	0	0			Y(77)	4	0	4	4	4	4	4	0	3	4	4	4
Y(78)	0	4	4	0	0	3	4	3	4	0	0	4	0	0	0	0		Z(78)	0	1614.67	1417.85	0	0	1872.89	1646.2	1442.79	1247.37	0	0	1778.04	0	0	0	0			Y(78)	4	0	4	3	4	4	4	0	4	4	4	4
Y(79)	0	4	3	0	0	4	4	4	4	0	0	4	0	0	0	0		Z(79)	0	1617.84	1479.68	0	0	2099.64	1647.99	1460.11	1247.48	0	0	1779.2	0	0	0	0			Y(79)	3	0	4	4	4	3	4	0	4	4	4	4
Y(80)	0	3	3	0	0	4	4	4	4	0	0	3	0	0	0	0		Z(80)	0	1663.68	1484.89	0	0	2101.01	1650.33	1460.34	1247.52	0	0	1901.26	0	0	0	0			Y(80)	4	0	4	4	4	4	4	0	4	4	4	4
Y(81)	0	3	4	0	0	3	4	4	3	0	0	4	0	0	0	0		Z(81)	0	1669.89	1565.67	0	0	2105.1	1650.37	1460.5	1277.84	0	0	1908.53	0	0	0	0			Y(81)	3	0	4	4	3	3	4	0	4	4	4	3
Y(82)	0	4	3	0	0	0	4	3	4	0	0	4	0	0	0	0		Z(82)	0	1686.66	1643.1	0	0	0	1650.4	1483	1318.99	0	0	1911.18	0	0	0	0			Y(82)	4	0	4	4	4	4	4	0	4	4	4	4
Y(83)	0	4	0	0	0	0	4	4	4	0	0	4	0	0	0	0		Z(83)	0	1688.29	0	0	0	0	1657.92	1488.32	1333.14	0	0	1911.69	0	0	0	0			Y(83)	4	0	4	4	4	3	4	0	4	4	4	4
Y(84)	0	3	0	0	0	0	4	4	4	0	0	4	0	0	0	0		Z(84)	0	1695.1	0	0	0	0	1658.49	1491.18	1347.62	0	0	1911.97	0	0	0	0			Y(84)	4	0	4	4	4	4	4	0	4	4	4	4
Y(85)	0	0	0	0	0	0	4	4	4	0	0	4	0	0	0	0		Z(85)	0	0	0	0	0	0	1658.92	1491.86	1348.59	0	0	1912.17	0	0	0	0			Y(85)	4	0	4	4	4	4	4	0	3	4	3	4
Y(86)	0	0	0	0	0	0	4	3	4	0	0	4	0	0	0	0		Z(86)	0	0	0	0	0	0	1659.8	1532.21	1348.88	0	0	1924.54	0	0	0	0			Y(86)	4	0	4	3	3	3	4	0	3	4	4	3
Y(87)	0	0	0	0	0	0	3	3	4	0	0	4	0	0	0	0		Z(87)	0	0	0	0	0	0	1726.89	1536.42	1349.13	0	0	1932.11	0	0	0	0			Y(87)	4	0	4	4	3	4	4	0	3	4	4	4
Y(88)	0	0	0	0	0	0	3	3	4	0	0	4	0	0	0	0		Z(88)	0	0	0	0	0	0	1730.1	1540.63	1349.33	0	0	1932.79	0	0	0	0			Y(88)	4	0	4	4	3	3	4	0	0	4	4	4
Y(89)	0	0	0	0	0	0	0	3	3	0	0	3	0	0	0	0		Z(89)	0	0	0	0	0	0	0	1548.84	1414.05	0	0	1952.47	0	0	0	0			Y(89)	4	0	4	4	4	4	4	0	0	4	4	4
Y(90)	0	0	0	0	0	0	0	3	3	0	0	4	0	0	0	0		Z(90)	0	0	0	0	0	0	0	1562.05	1426.26	0	0	1982.35	0	0	0	0			Y(90)	4	0	4	4	4	3	4	0	0	4	3	4
Y(91)	0	0	0	0	0	0	0	4	4	0	0	3	0	0	0	0		Z(91)	0	0	0	0	0	0	0	1569.65	1428.32	0	0	1992.68	0	0	0	0			Y(91)	3	0	4	4	4	4	4	0	0	4	4	4
Y(92)	0	0	0	0	0	0	0	3	4	0	0	3	0	0	0	0		Z(92)	0	0	0	0	0	0	0	1661.26	1430.52	0	0	2021.89	0	0	0	0			Y(92)	4	0	4	4	4	4	4	0	0	4	4	4
Y(93)	0	0	0	0	0	0	0	4	3	0	0	3	0	0	0	0		Z(93)	0	0	0	0	0	0	0	1698.01	1460.47	0	0	2080.1	0	0	0	0			Y(93)	4	0	4	4	4	4	4	0	0	3	4	3
Y(94)	0	0	0	0	0	0	0	4	4	0	0	0	0	0	0	0		Z(94)	0	0	0	0	0	0	0	1698.04	1461.24	0	0	0	0	0	0	0			Y(94)	4	0	4	3	3	3	4	0	0	4	4	4
Y(95)	0	0	0	0	0	0	0	4	3	0	0	0	0	0	0	0		Z(95)	0	0	0	0	0	0	0	1698.15	1559.68	0	0	0	0	0	0	0			Y(95)	4	0	4	4	4	0	4	0	0	4	4	4
Y(96)	0	0	0	0	0	0	0	4	4	0	0	0	0	0	0	0		Z(96)	0	0	0	0	0	0	0	1698.25	1562.33	0	0	0	0	0	0	0			Y(96)	4	0	4	3	4	0	4	0	0	4	4	4
Y(97)	0	0	0	0	0	0	0	4	3	0	0	0	0	0	0	0		Z(97)	0	0	0	0	0	0	0	1722.22	1628.89	0	0	0	0	0	0	0			Y(97)	3	0	4	4	4	0	4	0	0	4	4	4
Y(98)	0	0	0	0	0	0	0	4	4	0	0	0	0	0	0	0		Z(98)	0	0	0	0	0	0	0	1722.62	1643.3	0	0	0	0	0	0	0			Y(98)	4	0	4	4	4	0	4	0	0	4	4	4
Y(99)	0	0	0	0	0	0	0	4	4	0	0	0	0	0	0	0		Z(99)	0	0	0	0	0	0	0	1779.51	1656.78	0	0	0	0	0	0	0			Y(99)	4	0	4	4	4	0	4	0	0	4	3	4
Y(100)	0	0	0	0	0	0	0	4	4	0	0	0	0	0	0	0		Z(100)	0	0	0	0	0	0	0	1779.97	1657.98	0	0	0	0	0	0	0			Y(100)	4	0	3	4	4	0	4	0	0	4	4	4
Y(101)	0	0	0	0	0	0	0	4	4	0	0	0	0	0	0	0		Z(101)	0	0	0	0	0	0	0	1780.67	1673.25	0	0	0	0	0	0	0			Y(101)	3	0	4	4	4	0	4	0	0	4	4	4
Y(102)	0	0	0	0	0	0	0	4	4	0	0	0	0	0	0	0		Z(102)	0	0	0	0	0	0	0	1794.94	1676.88	0	0	0	0	0	0	0			Y(102)	4	0	4	4	4	0	4	0	0	4	4	4
Y(103)	0	0	0	0	0	0	0	4	4	0	0	0	0	0	0	0		Z(103)	0	0	0	0	0	0	0	1795.02	1676.98	0	0	0	0	0	0	0			Y(103)	4	0	4	4	4	0	4	0	0	4	4	4
Y(104)	0	0	0	0	0	0	0	4	4	0	0	0	0	0	0	0		Z(104)	0	0	0	0	0	0	0	1831.14	1677.02	0	0	0	0	0	0	0			Y(104)	4	0	4	4	4	0	4	0	0	4	4	4
Y(105)	0	0	0	0	0	0	0	4	3	0	0	0	0	0	0	0		Z(105)	0	0	0	0	0	0	0	1849.37	1687.1	0	0	0	0	0	0	0			Y(105)	3	0	4	4	3	0	4	0	0	4	4	4
Y(106)	0	0	0	0	0	0	0	3	0	0	0	0	0	0	0	0		Z(106)	0	0	0	0	0	0	0	1922.47	0	0	0	0	0	0	0	0			Y(106)	4	0	3	3	3	0	3	0	0	4	4	4
Y(107)	0	0	0	0	0	0	0	3	0	0	0	0	0	0	0	0		Z(107)	0	0	0	0	0	0	0	2064.68	0	0	0	0	0	0	0	0			Y(107)	3	0	4	4	0	0	4	0	0	4	3	4
Y(108)	0	0	0	0	0	0	0	4	0	0	0	0	0	0	0	0		Z(108)	0	0	0	0	0	0	0	2095.51	0	0	0	0	0	0	0	0			Y(108)	0	0	4	4	0	0	4	0	0	4	4	4
Y(109)	0	0	0	0	0	0	0	3	0	0	0	0	0	0	0	0		Z(109)	0	0	0	0	0	0	0	2107.89	0	0	0	0	0	0	0	0			Y(109)	0	0	4	4	0	0	4	0	0	4	4	4
Y(110)	0	0	0	0	0	0	0	3	0	0	0	0	0	0	0	0		Z(110)	0	0	0	0	0	0	0	2133.1	0	0	0	0	0	0	0	0			Y(110)	0	0	3	4	0	0	4	0	0	4	4	3
																																					Y(111)	0	0	4	3	0	0	4	0	0	4	3	4
																																					Y(112)	0	0	4	4	0	0	4	0	0	4	0	3
																																					Y(113)	0	0	4	4	0	0	4	0	0	4	0	4
																																					Y(114)	0	0	4	4	0	0	4	0	0	4	0	3
																																					Y(115)	0	0	4	4	0	0	4	0	0	4	0	4
																																					Y(116)	0	0	4	4	0	0	4	0	0	4	0	4
																																					Y(117)	0	0	4	4	0	0	4	0	0	4	0	4
																																					Y(118)	0	0	4	4	0	0	3	0	0	4	0	4
																																					Y(119)	0	0	3	4	0	0	4	0	0	4	0	4
																																					Y(120)	0	0	3	4	0	0	3	0	0	4	0	4
																																					Y(121)	0	0	0	4	0	0	4	0	0	4	0	4
																																					Y(122)	0	0	0	4	0	0	4	0	0	4	0	3
																																					Y(123)	0	0	0	4	0	0	4	0	0	4	0	4
																																					Y(124)	0	0	0	4	0	0	4	0	0	3	0	4
																																					Y(125)	0	0	0	4	0	0	4	0	0	4	0	4
																																					Y(126)	0	0	0	4	0	0	4	0	0	3	0	4
																																					Y(127)	0	0	0	4	0	0	4	0	0	4	0	4
																																					Y(128)	0	0	0	4	0	0	4	0	0	4	0	4
																																					Y(129)	0	0	0	4	0	0	3	0	0	4	0	3
																																					Y(130)	0	0	0	4	0	0	4	0	0	4	0	4
																																					Y(131)	0	0	0	4	0	0	4	0	0	4	0	3
																																					Y(132)	0	0	0	3	0	0	4	0	0	4	0	3
																																					Y(133)	0	0	0	4	0	0	4	0	0	4	0	4
																																					Y(134)	0	0	0	3	0	0	4	0	0	3	0	4
																																					Y(135)	0	0	0	4	0	0	4	0	0	4	0	4
																																					Y(136)	0	0	0	3	0	0	4	0	0	4	0	4
																																					Y(137)	0	0	0	4	0	0	4	0	0	3	0	4
																																					Y(138)	0	0	0	4	0	0	4	0	0	4	0	4
																																					Y(139)	0	0	0	4	0	0	4	0	0	4	0	4
																																					Y(140)	0	0	0	4	0	0	4	0	0	3	0	4
																																					Y(141)	0	0	0	4	0	0	4	0	0	3	0	4
																																					Y(142)	0	0	0	4	0	0	4	0	0	4	0	4
																																					Y(143)	0	0	0	4	0	0	4	0	0	4	0	4
																																					Y(144)	0	0	0	3	0	0	4	0	0	4	0	4
																																					Y(145)	0	0	0	0	0	0	4	0	0	4	0	4
																																					Y(146)	0	0	0	0	0	0	4	0	0	4	0	4
																																					Y(147)	0	0	0	0	0	0	4	0	0	4	0	4
																																					Y(148)	0	0	0	0	0	0	4	0	0	4	0	3
																																					Y(149)	0	0	0	0	0	0	4	0	0	3	0	4
																																					Y(150)	0	0	0	0	0	0	4	0	0	4	0	4
																																					Y(151)	0	0	0	0	0	0	4	0	0	4	0	4
																																					Y(152)	0	0	0	0	0	0	4	0	0	4	0	4
																																					Y(153)	0	0	0	0	0	0	4	0	0	4	0	4
																																					Y(154)	0	0	0	0	0	0	4	0	0	4	0	4
																																					Y(155)	0	0	0	0	0	0	4	0	0	4	0	4
																																					Y(156)	0	0	0	0	0	0	4	0	0	4	0	3
																																					Y(157)	0	0	0	0	0	0	4	0	0	4	0	4
																																					Y(158)	0	0	0	0	0	0	4	0	0	4	0	4
																																					Y(159)	0	0	0	0	0	0	4	0	0	4	0	4
																																					Y(160)	0	0	0	0	0	0	4	0	0	3	0	4
																																					Y(161)	0	0	0	0	0	0	4	0	0	4	0	4
																																					Y(162)	0	0	0	0	0	0	4	0	0	3	0	4
																																					Y(163)	0	0	0	0	0	0	4	0	0	4	0	4
																																					Y(164)	0	0	0	0	0	0	3	0	0	4	0	4
																																					Y(165)	0	0	0	0	0	0	4	0	0	4	0	4
																																					Y(166)	0	0	0	0	0	0	4	0	0	4	0	4
																																					Y(167)	0	0	0	0	0	0	3	0	0	4	0	4
																																					Y(168)	0	0	0	0	0	0	4	0	0	4	0	4
																																					Y(169)	0	0	0	0	0	0	4	0	0	4	0	3
																																					Y(170)	0	0	0	0	0	0	4	0	0	4	0	0
																																					Y(171)	0	0	0	0	0	0	4	0	0	4	0	0
																																					Y(172)	0	0	0	0	0	0	3	0	0	4	0	0
																																					Y(173)	0	0	0	0	0	0	4	0	0	4	0	0
																																					Y(174)	0	0	0	0	0	0	4	0	0	4	0	0
																																					Y(175)	0	0	0	0	0	0	4	0	0	4	0	0
																																					Y(176)	0	0	0	0	0	0	3	0	0	4	0	0
																																					Y(177)	0	0	0	0	0	0	4	0	0	3	0	0
																																					Y(178)	0	0	0	0	0	0	4	0	0	0	0	0
																																					Y(179)	0	0	0	0	0	0	4	0	0	0	0	0
																																					Y(180)	0	0	0	0	0	0	3	0	0	0	0	0
																																					Y(181)	0	0	0	0	0	0	4	0	0	0	0	0
																																					Y(182)	0	0	0	0	0	0	3	0	0	0	0	0
																																					Y(183)	0	0	0	0	0	0	4	0	0	0	0	0
																																					Y(184)	0	0	0	0	0	0	4	0	0	0	0	0
																																					Y(185)	0	0	0	0	0	0	4	0	0	0	0	0
																																					Y(186)	0	0	0	0	0	0	4	0	0	0	0	0
																																					Y(187)	0	0	0	0	0	0	4	0	0	0	0	0
																																					Y(188)	0	0	0	0	0	0	4	0	0	0	0	0
																																					Y(189)	0	0	0	0	0	0	3	0	0	0	0	0
[truncated: 157 more columns]
