# Supplementary material for: A corticostriatal deficit promotes temporal distortion of automatic action in ageing
Source: eLife journal article supplement (doi:10.7554/elife.29908), 2017-10-23
Supplement: supp [file elife-29908-supp-v1.zip › elife_poa_e29908_Figure_2_source_data2.xlsx]

## Sheet: Lever DOWN (1)
\Experiment code: JBG015
\Experiment summary: 7 Aged (A1-7; 20-22 months old) and 8 Young (Y1-8; 2-3 months old) mice (C57-Bl6) were submitted to instrumental training (increasing pseudorandom lever hold interval). CRF or LH0: constant reinforcement (Days 1-3, data not shown in this dataset); LH0.3: average lever hold 0.3 sec (Days 4-6); LH0.8: average lever hold 0.8 sec (Days 7-9); LH2: average lever hold 2 sec (Days 10…
\Data type and description: event-time stamp data. The time at which each event occurred (values 1-2) was stamped with a 10 ms resolution. 1=lever pressed (Lever DOWN tab); 2=lever released (Lever UP tab). Data were obtained through MED STATE NOTATION (MED Associates). NOTE: this exercise requires the lever inputs to be flipped to “level” position (up) in the controllers (LEVEL/TOGGLE section).
\Authors: Miriam Matamales (ORCID: 0000-0001-9978-0091), J Bertran-Gonzalez (ORCID: 0000-0002-3794-1782), Zala Skrbis (ORCID: 0000-0003-1649-9726)
DAY 4																		DAY 5																		DAY 6
20141205																		20141206																		20141207
Subject	Y1	Y2	Y3	Y4	Y5	Y6	Y7	Y8	A1	A2	A3	A4	A5	A6	A7			Subject	Y1	Y2	Y3	Y4	Y5	Y6	Y7	Y8	A1	A2	A3	A4	A5	A6	A7			Subject	Y1	Y2	Y3	Y4	Y5	Y6	Y7	Y8	A1	A2	A3	A4	A5
Count	99	93	64	58	53	31	128	118	83	200	62	49	57	67	61			Count	94	68	77	71	98	48	235	108	195	372	68	46	91	71	128			Count	89	53	50	163	56	53	158	104	170	101	55	50	77
Event #1	7.17	497.28	12.62	10.54	3.14	430.12	1.23	51.47	26.12	5.16	3.3	8.08	11.85	44.15	2.89			Event #1	12.56	31.28	30.75	24.22	109.97	15.67	9.23	9.97	16.7	9.66	36.25	6.22	42.27	3	10.34			Event #1	14.49	20.72	31.67	11.14	13.05	10.99	1.03	6.68	10.47	6.71	17.35	30.74	23.41
Event #2	7.37	497.38	12.7	10.68	3.36	633.54	3.65	51.52	26.76	5.38	3.44	8.25	11.96	44.36	3.02			Event #2	12.66	31.43	35.08	24.71	161.76	16.14	10.18	10.1	21.89	13.89	38.46	6.58	42.37	3.08	13.84			Event #2	16.18	21.02	31.88	11.22	13.19	11.12	1.15	6.82	12.5	8.61	17.56	32.05	41.49
Event #3	7.49	498.09	12.92	10.9	7.77	634	7.41	53.24	49.61	8.64	3.66	8.47	12.18	102.58	3.12			Event #3	13.18	31.65	37.42	25.15	243.52	16.3	14	13.03	27.76	14.01	44.12	8.93	85.06	3.3	13.96			Event #3	17.34	30.58	32.1	11.49	13.41	11.34	16.12	10.07	12.62	8.74	17.78	32.51	41.69
Event #4	29.57	500.87	13.02	12.73	7.96	634.22	9.15	53.6	53.88	9.11	28.68	8.77	77.37	112.86	3.49			Event #4	13.41	31.95	39.8	26.22	254	16.52	14.14	13.44	27.98	14.54	45.88	9.41	95.29	6.21	16.43			Event #4	18.91	30.66	40.94	11.59	14.05	11.48	16.29	10.26	39.83	8.96	18	32.73	41.91
Event #5	29.68	501.03	13.24	12.83	8.18	634.86	11.14	99.73	54.01	9.33	28.84	8.99	78.16	113.08	13.54			Event #5	43.02	32.17	40.63	27.09	255.02	106.24	16	13.66	28.14	14.64	46.53	9.63	95.75	6.41	16.51			Event #5	19.54	30.88	41.03	35	49.11	38.1	25.44	37.23	45.36	49.69	18.22	32.88	63.7
Event #6	29.9	501.25	13.37	13.05	8.41	635.08	11.32	99.9	54.23	74.72	29.06	9.14	117.25	113.3	13.68			Event #6	46.12	57.1	41.79	42.1	255.42	191.21	16.11	13.8	31.83	42.11	48.82	64.47	95.97	149.01	16.57			Event #6	20.26	43.59	41.25	35.14	74.05	38.2	25.57	37.33	47.53	49.79	18.32	91.08	66.28
Event #7	45.71	501.42	30.09	13.18	251.39	635.49	13.15	101.69	73.12	79.17	69.86	9.36	117.32	133.61	13.86			Event #7	46.28	58.96	41.9	46.72	255.64	191.5	18.14	224.33	37.99	42.28	49.22	64.67	129.59	149.12	16.99			Event #7	20.73	43.71	56.7	43.09	74.23	38.42	37.1	46.25	47.63	65.08	18.54	91.92	66.38
Event #8	45.85	582.96	30.23	13.93	251.56	635.71	16.18	160.41	76.61	83.54	69.97	9.76	117.53	133.74	14.08			Event #8	64.45	59.31	58.64	48.67	256.65	372.46	18.54	224.43	38.41	58.23	63.2	64.89	133.78	149.34	19.01			Event #8	42.09	43.84	56.75	46.41	78.08	39.12	41.34	46.36	50.6	65.26	18.73	92.14	66.67
Event #9	65.04	584.46	30.45	14.05	251.78	635.76	27.49	162.01	78.84	87.89	70.37	9.89	190.87	135.52	14.26			Event #9	64.59	67.25	58.78	50.83	383.12	373.34	18.76	257.44	80.78	60.82	63.65	65.02	136.45	250.28	19.12			Event #9	42.2	44.06	56.97	46.62	78.18	39.29	41.63	46.58	50.82	82.81	18.95	92.44	78.59
Event #10	65.21	584.53	43.22	14.18	252.18	635.98	27.62	166.02	81.68	91	70.59	10.11	217.36	135.66	14.72			Event #10	85.29	67.36	59	53.06	405.16	373.56	28.16	258.05	80.83	63.71	67.63	65.24	136.92	250.84	19.25			Event #10	54.25	44.17	66.47	46.88	78.34	39.51	41.85	63.89	52.94	82.91	126.74	162.54	82.36
Event #11	84.47	584.75	43.36	14.4	252.4	636.09	30.35	167.76	84.22	91.56	71.07	54.61	226.65	135.88	14.94			Event #11	87.46	67.5	59.13	57.4	441.54	373.78	37.27	258.25	81.05	66.15	155.83	65.65	137.14	251.06	19.47			Event #11	54.3	68.6	66.58	46.98	78.56	41.18	54.21	63.99	57.45	83.13	127.03	162.71	87.6
Event #12	84.57	642.51	43.58	59.92	252.76	636.31	31.03	171.09	87.16	91.78	71.29	54.71	227.21	136.09	14.99			Event #12	90.24	68.25	69.96	58.81	441.74	512.32	40.14	285.3	83.96	66.54	156.57	153.52	149.79	285.63	21.6			Event #12	61.78	68.82	74.59	47.2	78.61	41.53	54.78	88.38	57.65	101.49	127.26	162.93	89.82
Event #13	95.67	643.43	43.75	60.08	410.42	636.52	31.45	176.26	90.48	165.39	122.1	54.93	270.54	136.31	60.16			Event #13	92.61	68.61	70.17	59.44	446.82	537.56	42.34	287.54	120.03	79.7	157.4	153.99	150.35	288.97	21.67			Event #13	64.79	69.04	74.8	84.86	78.83	41.88	55.13	88.52	85.2	101.67	127.43	207.18	89.94
Event #14	99.98	644.02	75.06	72.25	410.83	636.74	34.5	177.94	101.98	166.02	122.85	54.98	379.29	140.13	60.24			Event #14	94.39	68.96	77.6	59.66	447.1	537.74	46.59	288.1	125.05	82.09	158.94	154.21	162.46	293.75	21.87			Event #14	67.96	69.16	81.01	85.06	119.6	41.99	68.57	107.11	87.5	101.89	127.72	207.6	90.29
Event #15	102.28	644.73	75.24	72.44	415.89	636.89	45.13	231.2	104.32	166.24	124.52	55.2	537.03	140.53	60.33			Event #15	97.03	69.18	80.15	59.87	460.9	670.37	48.23	288.3	125.68	82.56	159.17	154.78	166.79	300.77	22.09			Event #15	70.28	69.38	81.24	102.33	119.78	42.21	68.8	107.35	89.83	113.18	127.94	207.82	109
Event #16	106.82	644.81	75.46	86.72	416.01	637.11	46	260.26	106.5	188.19	125.15	55.39	537.19	315.12	60.55			Event #16	99.31	69.59	82.75	84.43	461.47	670.5	48.38	288.77	169.67	82.78	159.39	155	169.88	301.26	22.13			Event #16	70.63	90.21	88.9	104.55	120	111.82	83.47	107.51	90.1	113.47	128.35	256.7	111.17
Event #17	110.01	645.28	85.24	96.19	416.23	637.3	51.34	309.64	109.13	196.1	125.37	133.7	537.41	315.78	61.39			Event #17	101.69	100.03	85.67	84.61	468.26	672.04	50.72	311.13	175.25	97.85	195.59	155.08	170.05	304.1	22.24			Event #17	75.55	90.67	89.04	108.21	120.13	111.92	83.74	123	97.78	113.69	128.57	256.8	113.99
Event #18	113.31	645.5	85.44	96.4	416.4	637.52	52.45	314.99	109.96	196.39	173.3	133.93	630.2	315.87	71.99			Event #18	108.94	100.46	87.64	102.03	470	672.22	50.98	313.86	177.96	99.96	196.01	155.3	178.98	304.73	22.46			Event #18	75.65	90.89	89.26	110.3	120.35	185.5	87.7	123.17	100.23	140.25	128.67	257.02	119.92
Event #19	113.79	650.01	85.66	96.6	416.62	637.62	53.08	316.44	132.55	198.96	173.87	134.15	630.34	316.09	72.08			Event #19	110.38	100.68	90.85	102.32	473.22	672.44	52.45	319.53	180.56	101.58	196.85	155.94	179.61	307.9	79.51			Event #19	76.17	90.99	101.8	112.95	120.58	185.9	88	144.95	100.52	140.36	128.89	257.9	122.07
Event #20	115.95	650.57	96.15	114.46	494.7	1119.75	53.3	320.94	136.13	199.71	174.09	224.65	630.56	316.24	72.3			Event #20	112.27	119.96	92.3	102.46	474.32	672.8	52.72	320.21	183.32	103.87	197.1	156.16	199.76	378.88	81.57			Event #20	76.34	91.21	102.09	117.93	160.16	202.9	89.27	145.07	123.2	140.58	129.06	258.12	124.28
Event #21	116.98	650.79	96.35	116.16	495.26	1120.02	54.74	322.57	139.25	202.51	174.21	225	630.73	317.34	86.33			Event #21	113.83	133.62	95.3	112.12	474.99	673.02	58.2	330.67	186.57	148.32	197.27	156.3	203.31	382.07	84.9			Event #21	76.56	118.87	115.36	119.33	162.79	203.2	91.39	170.94	123.31	160.84	129.28	362.82	126.57
Event #22	117.06	679.8	115.56	116.26	495.48	1120.49	86.97	322.84	139.47	210.66	174.89	225.22	630.95	317.91	86.45			Event #22	117	139.13	97.59	112.26	475.41	768.64	58.66	340.93	194.48	150.29	200.98	156.52	207.17	394.35	86.74			Event #22	97.1	119.02	115.72	119.68	163.08	203.42	103.48	171.12	158.3	161.05	129.39	363.29	129.29
Event #23	119.02	679.95	118.67	132.06	495.62	1120.71	87.58	324.9	143.57	211.21	175.2	226.63	697.78	318.13	86.67			Event #23	117.4	141.05	100.03	112.48	558.77	796.32	60.18	341.29	194.7	150.62	201.93	247.09	207.52	395.09	87.07			Event #23	97.44	119.49	120.61	127.77	163.3	221.85	109.07	201.01	158.47	163.32	197.92	363.51	129.75
Event #24	119.36	680.09	119.09	132.28	495.84	1121.55	106.56	329.99	146.18	211.41	176.14	226.83	706.14	376.3	86.84			Event #24	117.62	141.13	102.23	135.45	559.34	807.29	60.3	344.99	197.59	151	202.02	296.32	207.74	395.75	88.86			Event #24	99.83	142.67	120.97	129.22	165.62	221.96	110.56	275.27	181.49	165.25	198.28	363.87	131.82
Event #25	122.51	680.21	119.31	132.49	495.95	1121.77	124.4	332.7	149.21	214.04	177.97	227.03	709.93	376.65	114.91			Event #25	130.26	144.08	104.75	135.79	731.76	859.08	60.52	347.36	200.21	153.06	202.36	296.95	225.91	401.87	104.34			Event #25	102.08	143.07	128.76	133.66	166.26	240.85	114.54	278.55	187.87	165.64	198.5	364.09	132
Event #26	123.62	680.43	119.43	148.77	710	1424.44	125.32	332.8	152.18	215.47	241.77	227.25	710.32	376.87	115.06			Event #26	132.73	144.71	106.98	136.01	732.56	859.44	77.42	347.7	202.95	153.8	204.35	297.17	229.02	408.7	106.12			Event #26	102.49	143.29	128.86	136.51	166.48	240.9	116.55	282.65	190.49	202.75	198.64	364.19	132.63
Event #27	126.25	742.15	119.65	151.4	710.43	1424.83	126.44	333.43	152.59	217.78	242.4	233.9	710.54	376.97	115.28			Event #27	133.57	154.44	109.72	148.03	735.57	859.66	87.57	351.21	213.43	154.19	205.22	330.27	232.54	417.41	106.23			Event #27	102.84	150.72	142.99	136.94	209.92	241.12	117.02	282.86	190.74	204.79	198.86	367.89	143.83
Event #28	127.73	743.81	138.98	151.62	710.57	1621.59	126.54	423.44	152.73	218.33	242.62	234.1	710.69	377.19	115.45			Event #28	133.92	154.52	109.88	148.2	735.78	859.8	89.89	360.88	215.72	156.25	205.44	331.1	237.72	418.04	106.69			Event #28	113.63	151.12	145.78	138.48	210.12	258.4	117.24	309.59	193.28	208.49	199.07	368.46	146.2
Event #29	130.23	743.88	142.33	151.84	710.79	1622.47	126.94	423.52	153.15	218.41	243.05	234.5	710.91	377.66	115.9			Event #29	134.14	154.74	112.08	156.98	736.71	953.64	92.77	376	215.95	156.46	226.72	333.25	242.17	418.26	108.53			Event #29	113.71	164.86	145.92	141.5	210.34	258.54	117.34	312.4	193.64	210.52	199.29	368.64	149.39
Event #30	139.56	746.4	144.94	152.14	711.34	1622.69	128.92	424.71	157.4	220.45	244.55	234.72	711.05	459.69	115.98			Event #30	157.54	154.84	114.24	160.23	741.04	953.85	95.66	401.41	218.86	156.52	227.07	333.55	246.17	505.15	108.7			Event #30	113.93	164.96	146.14	143.31	223.91	258.98	134.67	315.07	196.41	211.95	307.7	368.86	151.31
Event #31	141.45	746.81	148.32	152.36	711.63	1622.83	129.07	424.85	157.59	223.33	244.63	235.15	790.01	483.56	116.2			Event #31	157.64	223.41	115.11	160.66	743.12	985.6	98	430.14	223.41	158.79	228.29	333.77	251.73	505.36	109.06			Event #31	132.13	165.18	151.89	145.48	226.75	259.17	142.52	317.83	201.44	274.94	308.12	499.32	153.45
Event #32	142.06	747.77	151.48	152.59	711.85		129.49	493.7	161.58	226.84	297.87	235.37	790.2	484.19	171.9			Event #32	161.01	224.05	122.35	160.71	745.84	1020.03	109.87	430.75	223.57	165.37	228.45	334.65	257.69	508.22	122.95			Event #32	134.49	165.32	152.07	145.97	227.58	307.77	144.81	318.18	204.64	278.18	308.34	499.52	155.33
Event #33	143.68	752.11	156.64	152.75	840.68		130.99	494.48	164.21	241.37	298	238.1	790.42	689.79	172.12			Event #33	163.58	236.73	134	160.93	746.47	1020.43	110.09	431.58	225.59	170.43	228.57	334.87	263	508.36	124.83			Event #33	134.8	165.54	167.03	147.54	239.99	307.98	144.94	382.67	207.2	278.47	309.04	499.74	157.37
Event #34	145.85	753.64	157.2	198.3	841.03		131.19	494.66	164.38	244.92	298.22	238.27	897.09	690.19	184.03			Event #34	167.5	236.87	136.35	183.74	746.69	1064.94	113.58	481.43	228.54	172.35	228.79	334.98	265.73	508.58	127.06			Event #34	136.94	165.75	167.2	150.17	248.11	351.31	152.19	386.31	216.54	309.29	309.19	499.91	159.11
Event #35	146.41	754.27	157.42	198.48	841.25		131.45	524.45	164.47	245.74	298.45	238.43	897.55	729.7	184.21			Event #35	168.93	237.09	136.82	187.84	746.8	1065.02	115.04	481.53	229.37	172.9	228.94	335.2	268.32	509.42	127.18			Event #35	138.95	210.87	176.87	150.57	248.27	390.68	152.36	389.64	257.67	312.78	309.65	500.13	159.98
Event #36	146.63	754.49	160.27	212.55	843.22		132.05	524.66	167.23	248.33	298.67	238.65	897.77	729.75	184.43			Event #36	174.47	237.26	147.31	188.33	747.02	1095.17	118.14	484.95	229.59	174.35	229.26	529.69	270.3	599.56	127.33			Event #36	142.21	210.98	179.57	157.7	265.44	391.08	152.59	392.01	262.8	314.38	309.87	500.34	168.11
Event #37	161.71	754.63	172.73	213.03	843.64		140.84	555.46	167.37	251.34	299.3	239.53	930.42	729.97	184.65			Event #37	180.82	283.2	147.45	191.87	843.1	1095.28	122.9	485.49	261.05	177.51	229.34	529.85	274.44	599.79	129.05			Event #37	142.85	211.33	179.96	158.04	268.21	391.3	173.43	396.64	265.52	314.6	337.42	500.56	168.21
Event #38	164.94	820.91	174.41	213.23	960.42		160.1	565.81	167.52	253.72	300.13	239.75	935.58	730.09	231.03			Event #38	183.41	283.37	147.67	192.31	843.45	1116.44	125	487.79	268.4	179.94	229.56	530.07	275.31	600.01	129.17			Event #38	143.48	223	192.46	161.27	268.36	409.83	174.11	399.1	267.79	315.22	337.59	557.66	168.43
Event #39	168.14	822.71	174.7	237.48	967.66		160.46	565.92	168.39	256.16	399.57	239.93	939.25	730.31	231.5			Event #39	186.56	299.72	154.93	194.31	906.17	1116.56	127.69	488.78	274.97	180.6	229.67	530.69	295.38	630.54	129.23			Event #39	157.57	223.17	192.65	161.73	268.71	413.52	176.68	401.12	267.95	315.88	337.81	557.88	188.78
Event #40	169.48	823.17	174.92	258.31	971.54		161.33	590.27	168.61	256.81	400.34	240.15	955.19	804.31	231.62			Event #40	189.15	299.86	155.07	196.82	911.07	1116.78	131.37	491.7	278.23	217.32	229.89	530.85	297.89	639.08	131.16			Event #40	157.78	223.39	192.75	172.44	268.93	432	177.17	404.43	268.16	317.86	340.81	558.1	190.67
Event #41	172.26	847.84	175.03	258.46	976.9		163.15	590.42	168.82	256.92	400.53	240.25	959.28	806.97	231.82			Event #41	191.2	300.08	155.29	197.47	911.54	1116.93	133.36	492.34	284.67	222.27	230.1	531.07	298.24	641.52	131.3			Event #41	168.76	223.75	200	172.57	269.05	451.03	186.19	409.2	270.6	318.32	345.72	559.77	190.96
Event #42	172.89	848.59	196.47	264.49	995.58		163.24	592.17	169.04	257.55	402	241.71	963.61	809.16	232.05			Event #42	192.69	307.85	178.52	197.58	911.76	1118.6	134.89	518.59	288.3	223.03	230.34	531.17	298.46	704.23	133.94			Event #42	171.49	256.33	200.14	172.79	269.27	451.62	197.05	412.12	273.16	353.9	345.9	559.85	201.04
Event #43	186.4	851.63	225.13	264.91	996.88		165.1	592.28	211.01	274.18	404.28	242.19	972.19	809.79	232.29			Event #43	193.56	311.01	178.61	199.36	948.91	1118.77	135.05	520.92	293.45	224.37	230.81	531.39	329.99	726.54	134.06			Event #43	172.11	260.31	200.36	188.38	269.35	463.46	198.89	414.32	275.31	356.22	348.42	560.41	201.15
Event #44	189.15	851.7	228.55	265.16	1016.75		166.79	661.83	211.4	276.45	441.91	242.41	972.3	810.01	235.77			Event #44	193.78	311.61	178.83	201.51	951.02	1118.97	155	527.65	293.61	227.68	231.03	531.51	336.04	726.8	134.2			Event #44	196.9	260.94	219.01	190.42	269.49	463.92	201.1	416.86	275.55	362.61	348.89	560.63	201.37
Event #45	189.98	852.02	231.17	279.28	1018.11		173.93	675.93	239.85	276.59	442.84	242.49	997.59	813	235.9			Event #45	212.41	316.51	179.02	202.59	966.97	1119.19	155.14	529.96	295.63	228.23	231.13	531.73	336.22	730.61	135.91			Event #45	199.26	261.16	221.72	190.89	323.79	482.37	201.77	419.11	277.83	365.16	422.89	640.28	253.16
Event #46	190.2	853.42	232	279.75	1018.74		178	676.13	239.99	277.21	443.29	321.05	997.74	813.64	236.19			Event #46	214.93	319.4	198.31	218.97	972.88	1119.67	157.55	533.09	295.8	231.27	231.35	531.95	336.44	730.84	136.38			Event #46	200.64	308.22	225.07	191.11	323.9	489.09	228.79	420.83	278.16	370.14	423.69	640.41	253.29
Event #47	206.96	853.78	249.2	279.97	1018.96		179.65	676.35	240.21	281.12	445.1	321.15	997.94	816.12	236.52			Event #47	216.14	320.42	198.52	220.19	973.79	1119.89	159.32	533.32	298.99	233.19	358.25		336.55	734.1	148.31			Event #47	208.48	308.29	230.61	191.22	324.12	491.83	235.27	421.22	280.38	372	426.45	640.63	253.51
Event #48	214.21	857.29	249.37	294.08	1019.8		180.17	694.77	288.18	281.26	445.55	321.37	998.16	816.8	236.63			Event #48	218.33	327.04	198.74	222.79	974.44	1120.12	159.53	535.88	299.27	233.64	360.35		336.77	734.41	152.52			Event #48	210.95	308.42	232.38	214.01	348.75	492.46	235.77	423.52	282.54	373.57	427.08	640.75	273.11
Event #49	246.82	859.78	249.59	294.17	1022.77		181.33	697.43	288.22	281.53	448.75	321.49	1065.66	816.98	236.82			Event #49	218.89	327.87	203.06	223.28	975.05		166.35	538.55	301.44	233.82	360.53		368.62	739.68	152.77			Event #49	211.47	313.61	233.07	214.19	351.6	492.68	239.82	425.64	283.25	373.92	427.3	749.99	273.2
Event #50	247.68	859.87	263.98	312.49	1023.65		187.54	698.93	288.44	284.52	448.93		1070.28	817.1	236.93			Event #50	219.11	328.09	207.93	225.16	976.04		173.53	541.21	301.61	234.37	360.82		371.36	739.76	152.91			Event #50	213.44	316.33	233.25	225.29	351.95	492.78	242.75	425.75	283.48	396.33	430.28	750.17	286.36
Event #51	250.21	860.78	264.33	312.61	1023.87		187.73	701.45	288.55	289.79	449.8		1070.35	860.82	237.15			Event #51	219.19	333.93	208.49	227.1	976.13		173.68	567.85	303.65	237.66	361.04		371.72	740.63	153.39			Event #51	215.56	316.96		226.94	352.17	583.6	243.06	428.16	292.45	396.54	430.91		291.1
Event #52	250.83	861.59	264.55	312.83	1144.88		188.22	702.32	329.89	290.75	450.02		1111.74	1045.02	267.23			Event #52	264.28	334.4	220.71	227.35	981.96		174.49	569.24	304.35	238.29	361.4		372.17	792.23	153.54			Event #52	215.98	339.39		229.08	373.01	611.31	244.94	429.23	295.79	396.76	431.13		297.62
Event #53	254.03	862.24	279.36	312.98	1144.97		188.96	704.32	333.04	293.24	450.13		1111.84	1050.52	267.36			Event #53	267.4	334.62	221.07	227.81	983.77		175.4	573.44	307.92	238.4	361.62		372.39	792.33	157.57			Event #53	216.81	339.58		229.61	373.4	611.48	245.34	429.44	298.3	437.87	431.21		303.8
Event #54	256.33	862.87	279.46	313.2			189.38	707.23	337.67	293.78	490.41		1112.06	1051.43	268.81			Event #54	269.99	362.69	231.23	228.03	984.27		175.82	582.02	308.08	240.1	361.67		372.61	792.55	157.78			Event #54	223.16			233.6	373.62		266.87	434.21	298.66	457.54	431.43		303.91
Event #55	258.29	863.09	279.68	343.37			194.44	708.91	339.57	296.62	490.6		1112.18	1055.78	268.92			Event #55	273.61	366.4	231.34	228.2	985.67		176.33	585.19	310.91	240.34	361.89		387.25	792.96	158			Event #55	223.69			243.73	399.86		267.01	436.85	302.28	462.07	431.54		304.13
Event #56	261.26	883.67	289.55	346.02			197.12	709.03	339.77	296.89	490.69		1112.4	1057.12	269.14			Event #56	275.86	368.49	231.56	228.59	992.83		176.75	586.18	311.24	242.63	362.01		387.88	793.18	158.08			Event #56	224.25			244.12	400.03		267.23	438.35	302.7	462.63			304.27
Event #57	261.88	883.77	294.41	348.76			221.5	713.18	339.99	298.83	490.91		1112.53	1059.83	269.35			Event #57	276.41	368.82	241.6	228.81	994.41		210.1	616.98	404.81	242.78	362.23		407.35	793.33	158.3			Event #57	226.24			246.01			279.34	438.69	307.01	477.24			304.49
Event #58	263.31	883.92	294.81	349.11			223.85	714.38	360.71	298.93	491.01			1060.15	325.27			Event #58	279.49	371.5	247.68	228.91	994.75		214.07	619.78	407.31	248.65	436.53		411.1	793.55	158.41			Event #58	228.74			248.25			279.76	441.32	307.24	482.54			342.99
Event #59	268.58	884.21	295.03				226.29	715.92	362.91	300.12	491.23			1061.31	325.76			Event #59	282.51	378.36	247.9	229.13	995.36		216.63	620.3	410.17	252.09	436.7		413.87	793.66	206.23			Event #59	229.17			252.5			279.98	444.62	310.44	484.99			350.16
Event #60	271.02	898.1	309.2				226.41	721.21	363.02	302.89	491.63			1062.14	325.84			Event #60	284.97	379.23	248.12	229.49	996.1		216.89	623.69	415.28	256.49	462.66		423.43	960.9	206.95			Event #60	231.98			252.67			291.95	445.01	310.96	492.32			350.32
Event #61	273.67	898.15	313.56				226.74	722.41	363.24	304.04	491.85			1066.58	326.19			Event #61	286.14	393.25	254.72	229.71	998.07		217.89	624.56	418.64	256.97	462.87		425.49	961	207.1			Event #61	232.81			253.07			292.05	445.23	313.03	494.25			364.72
Event #62	276.07	949.03	316.11				230.13	722.53	384.73	327.19	491.96			1078.12				Event #62	288.7	393.36	257.85	296.92	998.9		219.43	663.1	420.35	291	463.09		428.67	1011.26	207.24			Event #62	233.03			255.99			309.37	445.66	313.2	499.43			371.38
Event #63	276.7	949.15	319.8				230.82	726.48	384.83	329.57				1078.39				Event #63	289.54	393.58	258.2	297.6	999.12		222.24	663.24	422.78	314.28	463.31		431.56	1011.31	224.43			Event #63	233.56			260.7			311.46	445.88	315.68	501.99			371.56
Event #64	278.95	949.37	320.67				231.27	727.28	385.05	331.05				1078.55				Event #64	292.31	393.98	268.68	298.02	1095.8		226.18	663.46	422.93	318.51	463.53		431.78	1011.53	224.68			Event #64	253.33			275.6			312.08	512.84	315.8	505.75			383.51
Event #65	280.03	998.08					235.34	727.91	385.15	331.59				1078.77				Event #65	292.91	394.2	268.9	310.95	1097.55		228.54	690.99	425.24	320.35	463.93		433.48	1217.62	224.79			Event #65	255.63			276.02			315.61	515.55	316.6	507.98			383.59
Event #66	282.6	998.88					235.56	729.63	437.89	342.34				1085.56				Event #66	295.29	394.66	277.73	311.5	1118.6		246.59	694.86	427.44	321.31	508.73		435.81	1217.73	224.88			Event #66	256.48			277.48			316	517.98	318.1	510.23			405.94
Event #67	338.72	999.39					236.71	729.78	438.06	374.19				1085.85				Event #67	296.3	453.86	281.02	311.7	1127.22		248.09	697.86	427.56	323.84	508.91		436.64	1217.95	225.1			Event #67	260.75			277.96			318.1	520.32	328.32	512.91			406.15
Event #68	338.84	999.47					238.12	731.13	438.28	374.44								Event #68	296.9	454.32	281.41	325.27	1132.26		250.64	699.93	430.6	324.26	509		436.86	1250.81	225.33			Event #68	261.21			279.61			318.73	520.55	455.62	515.67			408.59
Event #69	339.06	999.82					238.95	732.94	438.41	375.29								Event #69	299.11		281.63	325.41	1132.93		250.8	700.7	430.74	327.81			436.94	1250.93	225.55			Event #69	263.18			282.92			333.35	523.18	457.97	517.91			408.72
Event #70	353.51	1016.39					239.91	733.4	485.18	375.41								Event #70	301.11		294.91	339.57	1133.8		252.87	703.67	433.28	328.09			437.16	1251.15	261.29			Event #70	263.7			283.38			333.6	525.41	462.19	518.09			427.14
Event #71	353.6	1016.48					240.01	735.56	485.29	378.24								Event #71	301.95		298.21	339.67	1134.02		253.1	706.46	433.38	328.48			489.95	1251.32	261.68			Event #71	265.57			284.05			335.73	527.6	465.41	531.54			427.3
Event #72	353.82	1016.61					240.23	744.77	485.51	378.68								Event #72	302.78		306.44		1134.19		256.04	711.73	436.06	334.33			490.04		264.16			Event #72	266.13			288.03			337.42	533.94	465.62	533.08			429.65
Event #73	383.67	1016.83					288.07	745.1	485.68	381.59								Event #73	329.93		308.64		1134.41		256.25	713.43	444.01	334.5			490.52		264.29			Event #73	268.88			290.38			338.54	542.36	467.99	537.34			429.82
Event #74	384.06	1065.62					314.6	746.57	490.7	381.66								Event #74	330.04		311.36		1136.54		258.32	715.02	447.56	339.81			503.42		264.58			Event #74	284.85			290.56			340.92	544.45	470.22	541.24			430.04
Event #75	405.31	1065.82					315.02	747.16	490.82	381.99								Event #75	330.26		314.48		1136.82		258.88	715.65	450.68	340.24			506.2		264.8			Event #75	285.04			291.16			341.35	547.02	470.39	543.86			447.25
Event #76	417.24	1083.06					315.31	748.68	665.52	385.38								Event #76	359.29		319.95		1137		260.43	715.87	453.08	340.92			511.5		300.29			Event #76	302.66			293.07			342.31	547.76	472.43	546.56			464.38
Event #77	421.21	1083.86					316.78	748.79	672.98	386.14								Event #77	366.86		320.41		1137.22		260.68	716.04	462.77	343.03			511.6		300.49			Event #77	302.77			293.77			345.08	550.17	473.3	547.07			467.3
Event #78	421.84	1083.95					317.14	748.92	676.84	388.08								Event #78	367.06				1258.1		260.75	795.57	464.04	343.5			511.82		300.59			Event #78	321.36			294.03			345.69	550.6	538.07	548.88
Event #79	424.65	1084.17					317.37	749.07	677.41	388.36								Event #79	388.21				1264.88		292.68	797.85	466.63	366.96			512.03		300.67			Event #79	323.93			294.59			347.94	552.51	538.19	549.32
Event #80	437.47	1087.76					382.67	749.18	680.29	389.96								Event #80	388.35				1265.23		309.88	798.07	626.26	378.72			576.83		302.98			Event #80	324.04			304.63			348.12	552.97	576.17	550.9
Event #81	440.63	1088.33					383.85	749.38	680.5	396.61								Event #81	414.1				1323.52		310.06	815.69	630.07	401.86			590.18		303.55			Event #81	324.26			306.84			348.59	553.19	576.22	551.53
Event #82	443.07	1088.55					396.11	750.79	713.69	396.76								Event #82	414.28				1335		310.87	818.28	763.01	404.59			590.34		305.79			Event #82	324.39			307.31			350.74	595.13	600.92	551.75
Event #83	443.7	1089.53					396.45	751.62	713.99	397.06								Event #83	435.52				1337.33		311.53	818.48	769.43	405.5			612.05		305.92			Event #83	355.02			308.1			353.95	598.8	604.1	551.96
Event #84	468.98	1093.07					397.74	751.84		397.54								Event #84	435.74				1337.96		316.33	840.9	898.51	413.62			612.43		307.94			Event #84	357.72			312.47			360.92	604.24	604.28	637.53
Event #85	469.03	1094.12					402.84	752.31		563.24								Event #85	468.17				1338.18		323.72	843.24	899.41	415.96			615.61		308.57			Event #85	357.81			312.93			382.74	604.44	631.47	637.63
Event #86	469.25	1094.63					404.8	867.86		582.84								Event #86	468.3				1338.48		326.01	843.53	905.72	416.45			622.77		308.93			Event #86	379.8			314.26			383.95	623.9	631.57	663.65
Event #87	483.54	1094.78					404.91	868.03		583.19								Event #87	476.42				1338.7		327.71	876.73	905.93	416.73			623.78		309.05			Event #87	379.95			316.43			384.51	626.99	653.82	669.19
Event #88	483.74	1097.25					405.98	868.25		583.73								Event #88	476.59				1339.1		329.89	876.84	915.08	416.86			628.01		309.18			Event #88	399.97			321.83			398.33	629.8	660.16	702.78
Event #89	543.31	1099.55					419.71	870.52		583.91								Event #89	490.16				1339.32		335.84	890.22	919.61	419.6			628.22		309.3			Event #89	400.15			323.14			403.16	632.85	665.11	707.41
Event #90	543.53	1101.15					453.59	871.09		584.42								Event #90	490.26				1339.79		341.29	890.3	919.74	420.23			628.44		320.73			Event #90				323.87			405.34	635.57	669.99	709.76
Event #91	550.21	1101.92					455.36	933.21		584.84								Event #91	524.39				1411.44		341.92	890.52	922.21	455.85			628.65		323.46			Event #91				324.04			405.57	638.87	670.26	712.2
Event #92	550.51	1102.98					465.61	946.66		585.71								Event #92	527.95				1411.54		370.31	912.86	925.02	455.96					323.58			Event #92				349.98			407.71	641.38	676.02	718.24
Event #93	580.41	1103.81					467.07	947.73		586.03								Event #93	529.98				1411.76		370.52	912.95	927.74	491.55					323.8			Event #93				350.48			410.72	641.85	676.48	724.23
Event #94	580.52						467.94	948.72		641.69								Event #94	530.27				1411.84		381.91	913.17	927.87	491.69					323.87			Event #94				353.66			411.65	642.07	713.44	726.89
Event #95	606.52						469.94	953.27		646.13								Event #95					1469.55		382.14	950.04	930.37	491.91					324.26			Event #95				354.1			411.83	644.5	713.59	729.94
Event #96	609.43						470.07	955.08		648.01								Event #96					1469.68		394.97	950.57	933.25	492.05					368.02			Event #96				354.94			416.63	645.06	754.11	730.82
Event #97	609.63						573.9	959.6		648.31								Event #97					1469.9		401.49	950.67	933.39	492.27					368.42			Event #97				355.36			417.26	691.96	754.21	751.7
Event #98	627.75						574.12	960.46		653.98								Event #98					1469.95		401.7	963.41	935.48	531.56					371.09			Event #98				357.96			427.85	710.81	780.09	751.81
Event #99	627.94						574.34	961.89		654.26								Event #99							404.19	966.26	938.29	531.83					371.24			Event #99				358.37			430.16	711.1	780.2	767.42
Event #100							596.59	966.14		656.69								Event #100							408	966.42	940.81	535.44					371.42			Event #100				358.92			430.38	720.94	799.68	772.56
Event #101							596.71	966.6		657.08								Event #101							410.99	980.3	946.95	535.79					371.6			Event #101				359.78			433.92	723.46	802.66	772.7
Event #102							596.93	967.47		657.88								Event #102							414.84	983.95	947.82	536.01					373.66			Event #102				360.73			434.26	726.75	805.42
Event #103							597.11	967.94		660.85								Event #103							422.67	987.08	948.04	561.53					373.81			Event #103				361.7			436.1	729.88	805.55
Event #104							640.37	974.66		662.99								Event #104							426.76	989.82	1021.74	561.72					374.14			Event #104				373.33			436.23	730.51	824.53
Event #105							640.6	975.85		663.22								Event #105							426.87	993.79	1021.94	561.86					374.52			Event #105				373.72			438.38		830.03
Event #106							640.81	978.55		664.35								Event #106							430.8	995.67	1048.95	585.46					376.92			Event #106				374.01			438.51		833.37
Event #107							657.39	980.91		664.56								Event #107							430.92	998.44	1049.31	587.89					377.27			Event #107				374.53			441		835.67
Event #108							657.5	981.78		665.16								Event #108							434.1	998.79	1049.53	646					377.49			Event #108				385.46			446.21		838.29
Event #109							675.34	982		669.89								Event #109							436.62		1075.61	649.19					380.11			Event #109				386.53			448.05		841.07
Event #110							675.48	983.89		670.42								Event #110							438.73		1079.31	651.79					409			Event #110				390.37			454.77		848.26
Event #111							700.35	984.11		670.54								Event #111							444.35		1081.94	653.79					410.91			Event #111				391.39			457.21		853.33
Event #112							700.52	984.33		672.11								Event #112							446.81		1085.07	654.25					413.63			Event #112				392.26			457.79		855.83
Event #113							700.74	984.51		672.51								Event #113							448.94		1088.04	656.69					414.22			Event #113				392.68			460.97		858.43
Event #114							700.93	984.73		673.38								Event #114							450.92		1090.94	656.85					416.8			Event #114				392.9			461.84		860.46
Event #115							733.19	984.83		675.32								Event #115							454.7		1094.85	703.21					416.89			Event #115				400.64			472.15		863.12
Event #116							733.24	1100.38		675.72								Event #116							455.21		1097.54	705.4					417.45			Event #116				401.77			474.33		865.21
Event #117							749.99	1103.79		680.5								Event #117							455.46		1100.64	707.46					419.14			Event #117				401.97			474.54		867.94
Event #118							765.89	1103.89		683.35								Event #118							457.83		1100.8	710.07					419.31			Event #118				402.19			474.8		870.61
Event #119							780.75			693.66								Event #119							459.68		1103.42	710.31					421.31			Event #119				426.65			491.35		876.01
Event #120							787.38			695.35								Event #120							464.08		1105.69	712.62					423.07			Event #120				427.11			495.41		878.42
Event #121							787.45			695.64								Event #121							467.47		1108.03	712.83					423.7			Event #121				429.63			495.7		880.94
Event #122							787.67			696.13								Event #122							471.25		1108.59	714.85					447.65			Event #122				430.08			497.89		890.29
Event #123							803.89			696.57								Event #123							472.07		1136.18	717.4					447.82			Event #123				432.79			499.81		893.1
Event #124							803.98			699.38								Event #124							474.65		1140.79	722.21					447.99			Event #124				435.44			500		893.74
Event #125							804.2			699.48								Event #125							476.89		1143.67	723.91					448.21			Event #125				441.32			502.16		894.05
Event #126							820.9			699.57								Event #126							477.62		1147.24	726.66					459.94			Event #126				441.56			504.54		897.02
Event #127							826.2			701.37								Event #127							478.88		1147.39	728.3					460.34			Event #127				443.67			508.19		899.54
Event #128							826.36			701.51								Event #128							479.07		1149.45	728.57					461.17			Event #128				444.22			510.2		906.36
Event #129										701.62								Event #129							480.47		1152.07	733.99								Event #129				444.57			522.69		908.22
Event #130										702.29								Event #130							480.7		1152.24	734.44								Event #130				445.14			526.57		910.33
Event #131										702.39								Event #131							482.79		1155.17	734.58								Event #131				449.23			529.51		913.36
Event #132										705.77								Event #132							484.68		1157.68	736.09								Event #132				449.39			533.11		916.51
Event #133										706.19								Event #133							486.78		1157.82	736.21								Event #133				449.77			536.22		916.79
Event #134										707.48								Event #134							488.62		1160.17	736.57								Event #134				450.42			536.85		916.93
Event #135										707.83								Event #135							492.57		1162.59	736.74								Event #135				454.4			537.05		920.73
Event #136										713.31								Event #136							494.13		1162.71	738.8								Event #136				454.72			543.27		929.53
Event #137										714.43								Event #137							496.5		1165.52	738.99								Event #137				456.86			543.7		931.36
Event #138										716.28								Event #138							498.26		1168.16	739.32								Event #138				457.46			544.37		931.92
Event #139										716.41								Event #139							498.89		1172.31	739.69								Event #139				457.93			547.57		932.14
Event #140										717.52								Event #140							501.74		1172.45	742.37								Event #140				458.58			547.73		959.78
Event #141										719.66								Event #141							501.84		1176.6	742.51								Event #141				460.36			550.23		962.01
Event #142										720.15								Event #142							502.06		1178.71	744.78								Event #142				461.39			550.98		966.57
Event #143										723.74								Event #143							523.33		1179.1	747.49								Event #143				462.05			551.14		969.14
Event #144										723.87								Event #144							523.72		1197.65	747.73								Event #144				465.47			555.6		971.72
Event #145										724.73								Event #145							542.54		1203.61	751.6								Event #145				466.9			556.47		973.93
Event #146										725								Event #146							542.65		1204.26	752								Event #146				468.8			567.36		976.31
Event #147										728.46								Event #147							555.9		1208.83	755.45								Event #147				471.3			568.02		979.22
Event #148										731.33								Event #148							579.52		1209.46	757.6								Event #148				472.35			569.73		981.5
Event #149										740.91								Event #149							579.71		1265.7	758.23								Event #149				473.06			571.86		983.96
Event #150										749.21								Event #150							604.91		1265.78	758.54								Event #150				473.88			574.19		986.41
Event #151										750.08								Event #151							607.5		1266	758.94								Event #151				475.61			574.4		989.12
Event #152										751.03								Event #152							609.65		1295.83	782.07								Event #152				476.1			582.38		992.14
Event #153										753.17								Event #153							611.63		1305.48	784.04								Event #153				476.38			616.6		994.98
Event #154										755								Event #154							612.46		1305.65	786.23								Event #154				486.03			619.14		997.04
Event #155										755.28								Event #155							622.18		1340.78	788.41								Event #155				486.35			621.48		999.04
Event #156										755.75								Event #156							622.38		1341.01	789.08								Event #156				487.36			621.65		1001.7
Event #157										756.58								Event #157							624.83		1341.23	792.24								Event #157				488.38			624.64		1003.98
Event #158										756.8								Event #158							627.26		1358.4	792.64								Event #158				488.94			625.47		1005.66
Event #159										785.49								Event #159							631.19		1358.58	794.76								Event #159				489.58					1007.64
Event #160										786.07								Event #160							631.8		1385.24	795.01								Event #160				491.6					1009.72
Event #161										799.14								Event #161							634.02		1388.65	795.52								Event #161				492.66					1013.65
Event #162										807.66								Event #162							638.88		1391.06	795.68								Event #162				495					1016.08
Event #163										808.32								Event #163							640.92		1391.22	796.16								Event #163				495.63					1016.71
Event #164										821.4								Event #164							642.34		1415.31	796.88								Event #164									1016.93
Event #165										823.45								Event #165							642.55		1415.41	798.95								Event #165									1017.1
Event #166										823.56								Event #166							649.84		1415.63	799.45								Event #166									1017.32
Event #167										830.08								Event #167							649.97		1438.06	799.6								Event #167									1017.69
Event #168										843.15								Event #168							652.03		1443.71	801.7								Event #168									1018.32
Event #169										843.57								Event #169							653.97		1446.44	804.58								Event #169									1018.54
Event #170										843.73								Event #170							663.39		1448.62	826.91								Event #170									1018.72
Event #171										844.08								Event #171							667.26		1451.44	829.55
Event #172										951.55								Event #172							668.7		1451.73	832.76
Event #173										951.63								Event #173							669.29		1463.1	835.67
Event #174										979.01								Event #174							671.69		1466.2	837.78
Event #175										979.12								Event #175							675.24		1469.19	838.01
Event #176										1033.53								Event #176							677.12		1472.44	840.5
Event #177										1033.58								Event #177							679.77		1477.91	843.14
Event #178										1084.5								Event #178							681.43		1478.26	848.86
Event #179										1084.62								Event #179							683.41		1514.31	850.86
Event #180										1086.94								Event #180							683.56		1516.85	851.05
Event #181										1087.08								Event #181							708.42		1523.33	852.54
Event #182										1087.3								Event #182							712.92		1526.16	852.78
Event #183										1167.05								Event #183							715.04		1526.43	855.1
Event #184										1172.85								Event #184							718.87		1529.91	855.45
Event #185										1172.99								Event #185							722.73		1531.89	859.62
Event #186										1196.07								Event #186							725.32		1532.13	859.88
Event #187										1200								Event #187							727.71		1534.5	864.56
Event #188										1200.17								Event #188							730.22		1536.6	866.62
Event #189										1200.33								Event #189							731.35		1538.88	866.8
Event #190										1200.55								Event #190							740.59		1539.27	869.19
Event #191										1225.22								Event #191							742.18		1560.37	869.29
Event #192										1225.31								Event #192							742.42		1565.26	872.36
Event #193										1252.12								Event #193							745.15		1565.4	874.38
Event #194										1252.22								Event #194							747.21		1587.36	875.86
Event #195										1275.08								Event #195							747.32		1587.47	876
Event #196										1279.96								Event #196							748.84			881.1
Event #197										1280.06								Event #197							751.55			915.06
Event #198										1306.8								Event #198							752.93			916.69
Event #199										1309.27								Event #199							754.31			922.64
Event #200										1309.45								Event #200							759.06			924.47
																		Event #201							759.71			927.02
																		Event #202							760.3			927.35
																		Event #203							761.17			930.15
																		Event #204							775.85			930.89
																		Event #205							778.48			931.18
																		Event #206							780.15			933.67
																		Event #207							780.27			1000.95
																		Event #208							780.49			1012.14
																		Event #209							796.73			1014.89
																		Event #210							796.86			1016.69
																		Event #211							814.24			1018.94
																		Event #212							814.54			1021.25
																		Event #213							830.95			1021.47
																		Event #214							833.51			1023.96
																		Event #215							837.66			1025.9
																		Event #216							841.23			1026.04
																		Event #217							844			1027.81
																		Event #218							846.04			1027.99
																		Event #219							846.21			1029.6
																		Event #220							864.56			1029.75
																		Event #221							870.4			1031.3
																		Event #222							872.99			1031.64
																		Event #223							875.01			1033.87
																		Event #224							877.29			1034.01
																		Event #225							877.42			1035.11
																		Event #226							877.77			1039.14
																		Event #227							885.19			1041.55
																		Event #228							888.65			1041.7
																		Event #229							888.88			1043.97
																		Event #230							896.03			1045.5
																		Event #231							898.2			1046.22
																		Event #232							900.16			1046.99
																		Event #233							901.5			1048.84
																		Event #234							901.76			1049.03
																		Event #235							902.23			1049.53
																		Event #236										1051.23
																		Event #237										1051.38
																		Event #238										1051.65
																		Event #239										1053.48
																		Event #240										1053.62
																		Event #241										1054.69
																		Event #242										1057.01
																		Event #243										1057.64
																		Event #244										1059.68
																		Event #245										1075.16
																		Event #246										1077.02
																		Event #247										1083.56
																		Event #248										1086
																		Event #249										1086.59
																		Event #250										1118.5
																		Event #251										1121.18
																		Event #252										1124.09
																		Event #253										1125.97
																		Event #254										1134
																		Event #255										1137.32
																		Event #256										1138.77
																		Event #257										1138.88
																		Event #258										1140.93
																		Event #259										1141.05
																		Event #260										1141.3
																		Event #261										1143.41
																		Event #262										1143.56
																		Event #263										1143.77
																		Event #264										1146.98
																		Event #265										1147.16
																		Event #266										1149.64
																		Event #267										1149.82
																		Event #268										1151.6
																		Event #269										1151.9
																		Event #270										1154.82
																		Event #271										1156.68
																		Event #272										1157.93
																		Event #273										1170.64
																		Event #274										1172.87
																		Event #275										1173.01
																		Event #276										1198.78
																		Event #277										1200.7
																		Event #278										1225.47
																		Event #279										1230.99
																		Event #280										1231.29
																		Event #281										1232.98
																		Event #282										1234.31
																		Event #283										1234.43
																		Event #284										1236.67
																		Event #285										1237.22
																		Event #286										1237.61
																		Event #287										1239.44
																		Event #288										1240
																		Event #289										1240.5
																		Event #290										1241.64
																		Event #291										1244.37
																		Event #292										1244.49
																		Event #293										1244.87
																		Event #294										1248.62
																		Event #295										1252.07
																		Event #296										1252.31
																		Event #297										1255.15
																		Event #298										1256.53
																		Event #299										1257.65
																		Event #300										1258.35
																		Event #301										1258.47
																		Event #302										1258.79
																		Event #303										1312.29
																		Event #304										1314.68
																		Event #305										1316.91
																		Event #306										1319.94
																		Event #307										1322.75
																		Event #308										1344.36
																		Event #309										1346.13
																		Event #310										1348.03
																		Event #311										1348.64
																		Event #312										1349
																		Event #313										1399.78
																		Event #314										1402.8
																		Event #315										1404.81
																		Event #316										1407.46
																		Event #317										1408.76
																		Event #318										1411.14
																		Event #319										1412.82
																		Event #320										1412.98
																		Event #321										1413.79
																		Event #322										1414.32
																		Event #323										1414.45
																		Event #324										1414.61
																		Event #325										1416.45
																		Event #326										1416.74
																		Event #327										1417.08
																		Event #328										1418.53
																		Event #329										1421.01
																		Event #330										1422.89
																		Event #331										1423.77
																		Event #332										1424.13
																		Event #333										1424.25
																		Event #334										1429.09
																		Event #335										1431.74
																		Event #336										1431.95
																		Event #337										1432.15
																		Event #338										1432.47
																		Event #339										1530.11
																		Event #340										1530.26
																		Event #341										1539.96
																		Event #342										1601.81
																		Event #343										1604.82
																		Event #344										1612.84
																		Event #345										1615.4
																		Event #346										1618.37
																		Event #347										1629.01
																		Event #348										1632.22
																		Event #349										1640.58
																		Event #350										1678.5
																		Event #351										1696.92
																		Event #352										1698.96
																		Event #353										1699.33
																		Event #354										1700.22
																		Event #355										1700.31
																		Event #356										1704.01
																		Event #357										1706.04
																		Event #358										1706.25
																		Event #359										1706.68
																		Event #360										1709.18
																		Event #361										1711.24
																		Event #362										1711.37
																		Event #363										1711.96
																		Event #364										1712.17
																		Event #365										1712.3
																		Event #366										1713.95
																		Event #367										1714.22
																		Event #368										1716.5
																		Event #369										1717.74
																		Event #370										1725.53
																		Event #371										1732.63
																		Event #372										1756.75
[truncated: 178 more columns]

## Sheet: Lever UP (2)
DAY 4																		DAY 5																		DAY 6
20141205																		20141206																		20141207
Subject	Y1	Y2	Y3	Y4	Y5	Y6	Y7	Y8	A1	A2	A3	A4	A5	A6	A7			Subject	Y1	Y2	Y3	Y4	Y5	Y6	Y7	Y8	A1	A2	A3	A4	A5	A6	A7			Subject	Y1	Y2	Y3	Y4	Y5	Y6	Y7	Y8	A1	A2	A3	A4	A5
Count	99	93	64	58	53	31	128	118	83	200	62	49	57	67	61			Count	94	68	77	71	98	48	235	108	195	372	68	46	91	71	128			Count	89	53	50	163	56	53	158	104	170	101	55	50	77
Event #1	7.21	497.37	12.69	10.67	3.35	430.32	1.52	51.51	26.75	5.37	3.43	8.24	11.95	44.35	3			Event #1	12.65	31.42	31.34	24.38	110.36	15.73	9.53	10.09	17.02	9.72	36.96	6.57	42.32	3.07	10.69			Event #1	14.89	21.01	31.87	11.21	13.18	11.11	1.14	6.81	10.54	6.85	17.55	30.79	23.51
Event #2	7.48	497.38	12.7	10.68	3.36	633.99	3.94	51.52	26.76	5.38	3.44	8.25	11.96	44.36	3.11			Event #2	12.66	31.43	35.5	24.99	162	16.29	10.38	10.1	22.08	14	39.08	6.58	42.45	3.08	13.92			Event #2	16.48	21.02	31.88	11.22	13.19	11.12	1.15	6.82	12.61	8.73	17.56	32.5	41.68
Event #3	7.49	498.13	13.01	11.01	7.95	634	7.77	53.59	49.64	9.1	3.83	8.76	12.5	102.73	3.12			Event #3	13.4	31.94	37.92	25.63	243.88	16.3	14.09	13.43	27.88	14.01	44.65	9.4	85.28	3.33	14.31			Event #3	17.76	30.65	32.19	11.58	14.04	11.47	16.28	10.25	12.62	8.74	17.99	32.51	41.69
Event #4	29.67	501.02	13.02	12.82	7.96	634.85	9.21	53.6	54	9.11	28.83	8.77	77.84	113.07	3.59			Event #4	13.41	31.95	40.62	27.08	254.09	16.74	14.38	13.44	28.12	14.63	46.46	9.41	95.74	6.4	16.47			Event #4	19.53	30.66	41.02	11.59	14.05	11.48	16.29	10.26	39.98	8.98	18	32.87	41.95
Event #5	29.68	501.03	13.36	12.83	8.4	634.86	11.2	99.89	54.01	9.71	28.84	9.13	78.62	113.08	13.61			Event #5	43.08	32.27	40.63	27.09	255.41	106.52	16.07	13.79	28.24	14.64	46.57	9.68	95.75	6.41	16.56			Event #5	19.54	30.9	41.03	35.13	49.19	38.19	25.56	37.32	45.45	49.78	18.31	32.88	63.75
Event #6	29.97	501.41	13.37	13.17	8.41	635.48	11.35	99.9	54.37	75.26	29.47	9.14	117.31	113.41	13.85			Event #6	46.27	57.18	41.89	42.2	255.42	191.49	16.5	13.8	32.06	42.27	48.92	64.66	96.01	149.11	16.98			Event #6	20.72	43.63	41.32	35.14	74.13	38.2	25.57	37.33	47.62	49.79	18.32	91.91	66.37
Event #7	45.84	501.42	30.22	13.18	251.55	635.49	13.27	101.86	73.25	79.49	69.92	9.39	117.52	133.73	13.86			Event #7	46.28	59.3	41.9	47.05	255.98	191.5	18.53	224.42	38.4	42.28	49.97	64.67	129.69	149.12	16.99			Event #7	20.73	43.83	56.74	43.3	74.25	38.53	37.37	46.35	47.78	65.25	18.72	91.92	66.38
Event #8	45.85	583.02	30.23	14	251.56	635.75	16.37	160.58	76.7	83.67	70.36	9.88	117.53	133.74	14.25			Event #8	64.58	59.31	58.77	48.99	256.72	373.33	18.54	224.43	38.41	58.41	63.55	65.01	133.83	149.71	19.1			Event #8	42.19	43.84	56.75	46.61	78.15	39.28	41.62	46.36	50.74	65.26	18.73	92.43	66.74
Event #9	65.2	584.52	30.47	14.17	252.17	635.76	27.58	162.45	79.13	88.39	70.37	9.89	191.31	135.65	14.71			Event #9	64.59	67.34	58.78	51.21	383.33	373.34	18.94	257.61	80.82	60.98	63.82	65.02	136.91	250.83	19.24			Event #9	42.2	44.16	57.05	46.62	78.33	39.29	41.63	46.61	50.91	82.9	19.22	92.44	78.65
Event #10	65.21	584.53	43.35	14.18	252.18	636.08	27.86	166.27	81.95	91.55	71.06	10.18	217.56	135.66	14.72			Event #10	85.5	67.46	59.12	53.17	405.52	373.77	28.41	258.24	80.83	63.94	67.92	65.64	136.92	250.84	19.25			Event #10	54.29	44.17	66.57	46.97	78.34	39.84	42.21	63.98	53.09	82.91	126.86	162.7	82.43
Event #11	84.56	584.92	43.36	14.56	252.75	636.09	30.53	168.29	84.35	91.56	71.07	54.7	227.2	136.08	14.98			Event #11	87.53	67.59	59.13	57.82	441.64	373.78	37.69	258.25	81.24	66.53	156	65.65	137.17	251.29	19.51			Event #11	54.3	68.81	66.58	46.98	78.6	41.52	54.5	63.99	57.64	83.17	127.15	162.71	87.64
Event #12	84.57	642.76	43.74	60.07	252.76	636.51	31.43	171.57	87.54	91.93	71.72	54.71	227.21	136.09	14.99			Event #12	90.5	68.52	70.16	59.43	441.81	512.35	40.35	285.52	84.44	66.54	157.39	153.98	150.34	286.14	21.64			Event #12	61.95	68.82	74.79	47.31	78.61	41.53	55.12	88.51	57.65	101.66	127.31	163.35	89.86
Event #13	96.05	643.61	43.75	60.08	410.82	636.52	31.49	176.48	90.99	166.01	122.23	54.97	270.69	136.56	60.21			Event #13	92.79	68.95	70.17	59.44	447.04	537.73	42.63	287.73	120.17	79.92	157.4	153.99	150.35	289.55	21.86			Event #13	65.02	69.15	74.8	85.05	78.85	41.98	55.13	88.52	85.49	101.67	127.71	207.59	90.28
Event #14	100.33	644.18	75.23	72.43	410.83	636.88	34.66	178.23	102.14	166.02	123.34	54.98	379.33	140.52	60.32			Event #14	94.61	68.96	77.68	59.86	447.14	537.74	47.02	288.19	125.67	82.55	159.16	154.77	162.83	294.38	21.87			Event #14	68.25	69.16	81.23	85.06	119.77	41.99	68.79	107.18	87.56	102.03	127.72	207.6	90.29
Event #15	102.79	644.77	75.24	72.44	416	636.89	45.34	231.55	104.4	166.32	125.14	55.38	537.18	140.53	60.33			Event #15	97.35	69.58	80.47	59.87	460.93	670.49	48.3	288.76	125.68	82.56	159.17	154.78	167.3	301.09	22.11			Event #15	70.62	69.65	81.24	102.5	119.78	42.23	68.8	107.5	89.99	113.46	128.34	207.92	109.13
Event #16	107.29	645.27	75.61	86.87	416.01	637.29	46.29	260.66	107	188.78	125.15	55.39	537.19	315.19	60.6			Event #16	99.63	69.59	82.94	84.6	461.69	670.5	48.8	288.77	169.71	82.92	160.06	155.07	169.95	301.61	22.23			Event #16	70.63	90.66	89.03	104.82	120.12	111.91	83.55	107.51	90.19	113.47	128.35	256.79	111.29
Event #17	110.43	645.28	85.43	96.37	416.39	637.3	51.71	309.94	109.95	196.23	125.58	133.92	537.63	315.86	61.44			Event #17	101.91	100.45	85.79	84.61	468.68	672.21	50.83	311.19	175.43	98.21	195.73	155.08	170.13	304.72	22.24			Event #17	75.64	90.67	89.04	108.3	120.13	111.92	84.02	123.16	97.92	113.75	128.66	256.8	114.06
Event #18	113.72	645.58	85.44	96.59	416.4	637.61	53.07	315.19	109.96	196.59	173.86	133.93	630.33	315.87	72.07			Event #18	109.24	100.46	88.07	102.09	470.27	672.22	51.39	314.09	178.5	100.32	196.08	155.93	179.6	304.73	22.8			Event #18	75.65	90.98	89.34	110.58	120.57	185.89	87.91	123.17	100.51	140.35	128.67	257.89	120.04
Event #19	113.95	650.56	85.74	96.6	416.83	637.62	53.08	316.69	132.77	199.15	173.87	134.19	630.34	316.23	72.08			Event #19	110.77	101.28	91.66	102.45	473.25	672.79	52.52	319.66	181.03	101.7	196.9	155.94	179.61	308.09	79.57			Event #19	76.33	90.99	102.08	113.25	120.58	185.9	88.07	145.06	100.52	140.36	129.05	257.9	122.31
Event #20	116.4	650.57	96.34	114.54	495.25	1119.94	53.61	321.19	136.62	199.8	174.2	224.99	630.72	316.24	72.43			Event #20	112.65	120.1	92.63	102.46	474.6	672.8	52.87	320.71	183.45	104.16	197.19	156.29	199.99	379.34	81.83			Event #20	76.34	91.25	102.09	118.11	160.31	203.19	89.55	145.07	123.3	140.65	129.06	258.47	124.37
Event #21	117.03	650.82	96.35	116.25	495.26	1120.48	55.21	322.8	139.45	202.8	174.21	225	630.73	317.9	86.44			Event #21	114.16	133.76	95.72	112.25	475.4	673.11	58.65	330.8	187.07	148.48	197.79	156.3	203.4	382.21	85.21			Event #21	76.58	118.94	115.71	119.67	163.07	203.2	91.79	171.11	123.31	161.02	129.38	363.28	127.17
Event #22	117.6	679.84	115.86	116.26	495.61	1120.49	87.3	323.27	140.07	210.76	175.15	225.36	631.02	317.91	86.45			Event #22	117.39	139.57	98.08	112.26	475.41	768.72	58.66	341.19	194.59	150.4	201.19	156.71	207.51	394.96	87.02			Event #22	97.43	119.48	115.72	119.68	163.08	203.45	103.56	171.12	158.46	161.26	129.39	363.29	129.52
Event #23	119.34	679.99	119.08	132.14	495.62	1121.54	87.86	325.26	143.63	211.36	175.3	226.67	697.87	318.4	86.83			Event #23	117.4	141.12	100.18	112.55	559.33	796.81	60.29	341.67	194.8	150.71	201.98	247.5	207.52	395.3	87.14			Event #23	97.6	119.49	120.96	127.84	163.51	221.95	109.19	201.11	158.47	163.59	198.27	363.86	130.24
Event #24	119.77	680.2	119.09	132.48	495.94	1121.55	107.1	330.32	146.65	211.47	176.2	227.02	706.21	376.64	86.84			Event #24	117.76	141.49	102.67	135.59	559.34	807.91	60.3	345.35	198.01	151.34	202.32	296.94	207.94	395.94	89.02			Event #24	100.13	143.06	120.97	129.51	166.25	221.96	110.86	275.4	181.56	165.63	198.28	363.87	131.95
Event #25	122.98	680.21	119.42	132.49	495.95	1122.02	124.5	332.78	149.75	214.33	178.03	227.03	710.31	376.65	115.05			Event #25	130.55	144.7	105.17	136	732	859.43	60.95	347.62	200.45	153.49	202.59	296.95	226.33	402.21	104.45			Event #25	102.32	143.07	128.85	133.89	166.26	240.89	114.67	278.74	188.09	165.64	198.63	364.18	132.62
Event #26	124.03	680.56	119.43	148.98	710.15	1424.82	125.58	333.42	152.38	215.83	242.39	227.49	710.32	376.96	115.06			Event #26	132.99	144.71	107.36	136.01	732.85	859.44	77.68	348.03	203	154.13	205.21	297.59	229.5	409.24	106.16			Event #26	102.83	143.33	128.86	136.84	166.55	240.9	117.01	282.85	190.68	203.16	198.64	364.19	132.63
Event #27	126.68	742.56	119.81	151.61	710.56	1424.83	126.48	333.43	152.66	218.29	242.4	233.94	710.68	376.97	115.44			Event #27	133.91	154.51	109.79	148.19	735.72	859.79	87.72	351.29	213.5	154.41	205.22	331.09	232.59	418.03	106.68			Event #27	102.84	151.11	143.1	137.12	210.11	241.22	117.02	282.86	190.8	205.18	199.06	367.93	143.96
Event #28	128.21	743.86	139.49	151.62	710.57	1622.46	126.59	423.51	153.13	218.38	243.04	234.49	710.69	377.65	115.45			Event #28	133.92	154.52	110.15	148.2	735.96	859.8	90.26	361.69	215.86	156.38	205.76	331.1	237.79	418.04	106.69			Event #28	113.7	151.12	145.91	138.78	210.12	258.53	117.33	309.71	193.53	208.68	199.07	368.63	146.75
Event #29	130.66	743.93	142.52	152.13	710.9	1622.47	127.25	423.52	153.28	219.03	243.05	234.5	711.04	377.66	115.97			Event #29	134.22	154.83	112.69	157.2	736.96	953.84	93.14	376.49	216.02	156.51	227.06	333.54	243.01	418.28	108.69			Event #29	113.71	164.95	145.92	141.89	210.4	258.54	117.34	312.56	193.73	210.92	199.42	368.64	149.48
Event #30	139.96	746.77	145.44	152.14	711.62	1622.82	129.02	424.84	157.5	220.98	244.62	235.14	711.05	459.99	115.98			Event #30	157.6	154.84	115.1	160.43	741.36	953.85	96	401.56	219.28	156.74	227.07	333.55	246.26	505.35	108.81			Event #30	114.12	164.96	146.31	143.45	224.36	259.16	134.81	315.26	196.65	212.25	308.11	369.03	151.84
Event #31	142.01	746.85	148.71	152.39	711.63	1622.83	129.48	424.85	157.7	223.53	244.63	235.15	790.19	484.18	116.31			Event #31	158.03	224.04	115.11	160.7	743.38	985.73	98.11	430.24	223.52	158.94	228.37	334.64	251.82	505.36	109.46			Event #31	132.41	165.31	152.06	145.77	227.57	259.17	142.6	318.17	201.65	275.12	308.12	499.51	154.03
Event #32	142.29	748.26	152.03	152.74	711.91		129.62	493.81	162.08	226.97	297.99	235.47	790.2	484.19	172.11			Event #32	161.27	224.05	122.65	160.71	746.46	1020.42	109.96	431.57	223.62	165.48	228.56	334.65	258.49	508.35	123.02			Event #32	134.79	165.32	152.07	146.15	227.58	307.97	144.93	318.18	204.78	278.34	308.71	499.52	155.91
Event #33	144.18	752.64	157.19	152.75	841.02		131.05	494.65	164.29	241.47	298	238.22	790.79	690.18	172.12			Event #33	163.94	236.86	134.39	161.28	746.47	1020.43	110.3	431.58	226.04	170.66	228.57	334.97	263.72	508.36	125.16			Event #33	134.87	165.74	167.19	147.75	240.1	307.98	144.94	382.84	207.54	278.55	309.18	499.9	157.9
Event #34	146.4	754.26	157.2	198.47	841.03		131.37	494.66	164.46	244.97	298.44	238.42	897.54	690.19	184.2			Event #34	167.86	236.87	136.81	184.07	746.79	1065.01	113.77	481.48	229.36	172.53	228.93	334.98	265.83	509.41	127.12			Event #34	137.27	165.75	167.2	150.56	248.26	351.44	152.24	386.51	216.81	309.52	309.64	499.91	159.97
Event #35	146.41	754.27	157.58	198.48	841.39		132.01	524.65	164.95	246.03	298.45	238.43	897.55	729.74	184.21			Event #35	169.39	237.25	136.82	188.23	746.8	1065.02	115.42	481.82	229.37	173.05	228.94	335.28	268.43	509.42	127.29			Event #35	139.09	210.94	176.97	150.57	248.27	391.07	152.45	389.77	257.98	312.92	309.65	500.33	159.98
Event #36	147.25	754.62	160.34	212.65	843.63		132.25	524.66	167.36	248.46	299.11	239.52	897.82	729.75	184.64			Event #36	174.97	237.26	147.44	188.55	747.1	1095.27	118.3	485.36	229.79	174.88	229.33	529.84	271.12	599.78	127.54			Event #36	142.62	211.32	179.95	157.83	265.69	391.08	152.75	392.19	262.98	314.59	310.01	500.34	168.2
Event #37	161.98	754.63	173.02	213.22	843.64		141.08	555.52	167.41	251.69	300.12	239.53	930.55	730.08	184.65			Event #37	181.09	283.36	147.45	192.12	843.44	1095.28	123.22	485.77	261.22	177.99	229.34	529.85	275.3	599.79	129.11			Event #37	143.47	211.33	179.96	158.19	268.23	391.4	173.66	396.82	265.66	314.73	337.58	500.79	168.21
Event #38	165.38	820.97	174.69	213.23	961.05		160.33	565.91	168.38	253.93	300.13	239.92	936.33	730.09	231.12			Event #38	183.81	283.37	147.74	192.54	843.45	1116.55	125.36	488.13	268.61	180.56	229.66	530.21	275.31	600.29	129.22			Event #38	143.48	223.16	192.54	161.72	268.7	410.19	174.27	399.17	267.85	315.63	337.59	557.87	168.49
Event #39	168.63	823.16	174.7	237.57	967.8		160.74	565.92	168.39	256.43	399.75	239.93	939.39	730.51	231.55			Event #39	186.92	299.85	155.06	194.58	906.37	1116.56	127.83	489.01	275.2	180.85	229.67	530.84	295.62	630.77	129.44			Event #39	157.77	223.17	192.74	161.73	268.71	413.92	176.88	401.35	268.11	315.92	337.95	557.88	189.02
Event #40	169.98	823.17	175.02	258.41	971.84		162	590.41	168.81	256.87	400.42	240.24	955.23	804.81	231.67			Event #40	189.63	299.86	155.07	197.21	911.53	1116.92	131.7	491.89	278.76	217.43	230.09	530.85	298.23	639.35	131.28			Event #40	157.78	223.74	192.75	172.56	269.04	432.33	177.25	404.65	268.33	318.31	341.22	558.17	190.95
Event #41	172.88	848.02	175.03	258.7	977.3		163.2	590.42	168.82	257.54	401.14	240.25	959.36	807.56	231.86			Event #41	191.62	300.37	155.35	197.54	911.54	1116.93	133.56	492.95	285.17	222.5	230.1	531.16	298.24	641.67	131.74			Event #41	169.01	223.75	200.13	172.57	269.05	451.49	186.38	409.27	270.85	318.32	345.83	559.82	190.96
Event #42	172.89	848.86	197.04	264.9	995.96		163.29	592.27	169.18	257.55	402.16	242.18	963.65	809.78	232.22			Event #42	193.55	307.92	178.6	197.77	912.16	1118.7	134.97	519.13	288.34	223.55	230.8	531.17	298.51	704.31	134.03			Event #42	171.79	256.9	200.14	172.87	269.33	452.03	197.24	412.27	273.25	354.07	345.99	560.4	201.14
Event #43	186.73	851.68	225.59	264.91	997.23		165.56	592.28	211.39	274.41	404.95	242.19	972.23	809.79	232.33			Event #43	193.56	311.42	178.61	199.45	949.18	1118.96	135.13	521.15	293.53	224.87	230.81	531.5	330.05	726.79	134.17			Event #43	172.59	260.93	200.46	188.73	269.48	463.91	199.21	414.55	275.5	356.37	348.88	560.41	201.15
Event #44	189.97	851.93	229.18	265.54	1017.33		167.18	661.96	211.4	276.53	442.22	242.48	973.16	810.06	235.88			Event #44	194.3	312.15	179.01	201.9	951.49	1118.97	155.07	528.07	293.87	228.03	231.12	531.51	336.21	727.63	134.47			Event #44	197.32	260.94	219.31	190.88	269.49	463.92	201.43	417.17	275.6	362.69	348.89	560.76	201.41
Event #45	189.98	852.08	231.99	279.74	1018.73		173.95	676.12	239.98	276.74	443.06	242.49	997.64	813.6	236.18			Event #45	212.74	316.8	179.02	202.74	967.35	1119.66	155.47	530.18	295.74	228.68	231.13	531.94	336.22	730.68	136.37			Event #45	200.03	261.77	222.14	190.89	323.89	482.76	201.99	419.36	277.92	365.36	423.28	640.4	253.28
Event #46	190.26	853.72	232	279.75	1018.74		178.46	676.13	239.99	277.34	443.98	321.14	997.93	813.97	236.19			Event #46	215.29	320.14	198.51	219.03	973.16	1119.67	157.65	533.26	296.23	231.35	231.4	531.95	336.54	730.93	136.38			Event #46	200.96	308.27	225.46	191.21	323.9	489.69	228.95	421.17	278.25	370.33	424.14	640.41	253.29
Event #47	207.31	854.07	249.36	280.01	1019.79		179.82	676.46	240.26	281.18	445.15	321.15	997.94	816.3	236.56			Event #47	216.69	320.98	198.52	220.25	974.11	1120.11	159.43	533.86	299.22	233.54	358.39		336.55	734.29	148.51			Event #47	208.94	308.37	230.7	191.22	324.47	492.45	235.51	421.53	280.59	372.22	427.07	640.74	253.54
Event #48	214.61	857.86	249.37	294.16	1019.8		180.6	694.86	288.21	281.39	445.62	321.48	998.25	816.87	236.74			Event #48	218.88	327.86	198.76	223.06	974.7	1120.12	159.76	535.93	299.65	233.8	360.46		336.81	734.48	152.69			Event #48	211.22	308.92	232.79	214.18	349.09	492.46	235.87	423.91	282.61	373.91	427.08	640.75	273.19
Event #49	247.18	859.83	249.83	294.17	1023.64		181.6	697.55	288.22	281.58	448.92	321.49	1065.72	817.03	236.92			Event #49	218.89	327.87	203.62	223.55	975.55		166.71	539.13	301.53	234.29	360.81		368.68	739.72	152.82			Event #49	211.99	313.91	233.24	214.19	351.94	492.77	240.07	425.71	283.35	373.92	427.37	750.16	273.2
Event #50	248.15	860.11	264.32	312.6	1023.65		187.67	699.25	288.54	284.6	449.79		1070.34	817.26	236.93			Event #50	219.18	328.39	208.48	225.48	976.11		173.62	541.5	301.7	234.44	360.82		371.57	740.62	153.07			Event #50	213.86	316.95	233.25	225.59	351.95	492.78	242.97	426.14	283.9	396.53	430.9	750.17	286.46
Event #51	250.68	861	264.33	312.61	1023.97		188.15	701.62	288.55	290.08	449.8		1070.35	861.35	237.22			Event #51	219.19	334.39	208.49	227.29	976.56		174.04	567.87	304.21	237.74	361.39		371.75	740.63	153.51			Event #51	215.97	316.96		227.16	352.31	584.23	243.2	428.39	292.48	396.54	430.91		291.18
Event #52	250.96	862.02	264.57	312.97	1144.96		188.28	703.01	330	290.86	450.12		1111.83	1045.45	267.35			Event #52	264.53	334.4	221.06	227.8	982.59		174.57	570.02	304.81	238.35	361.4		372.38	792.32	153.66			Event #52	216.39	339.57		229.36	373.39	611.47	245.33	429.34	295.89	396.79	431.2		297.69
Event #53	254.74	862.86	279.45	312.98	1144.97		189.22	704.6	333.08	293.74	450.13		1111.84	1051.11	267.36			Event #53	267.68	335.22	221.07	227.81	984.03		175.53	573.7	308	238.59	361.66		372.39	792.33	157.77			Event #53	217.26	339.58		229.81	373.4	611.48	245.34	429.82	298.42	437.99	431.21		303.9
Event #54	257.05	862.87	279.46	313.24			189.46	707.55	337.72	294.03	490.47		1112.17	1051.89	268.91			Event #54	270.32	363	231.33	228.06	984.87		176.01	582.31	308.52	240.28	361.67		372.68	792.95	157.78			Event #54	223.67			233.79	373.78		267	434.58	299.41	457.76	431.53		303.91
Event #55	259.07	863.21	280.08	343.49			194.74	708.99	339.76	296.76	490.68		1112.18	1056.1	268.92			Event #55	273.99	366.57	231.34	228.58	986.22		176.74	585.92	311.17	240.47	362		387.87	792.96	158.07			Event #55	223.93			243.98	400.02		267.01	437.09	302.62	462.62	431.54		304.26
Event #56	261.82	883.73	289.74	346.1			197.35	709.45	339.77	296.95	490.69		1112.52	1057.47	269.34			Event #56	276.13	368.76	231.75	228.59	992.9		176.75	586.57	311.59	242.71	362.01		387.88	793.32	158.08			Event #56	224.69			244.39	400.03		267.33	438.43	303	462.63			304.27
Event #57	262.19	883.85	294.8	349.1			221.53	713.4	340.05	298.89	491		1112.53	1059.91	269.35			Event #57	276.75	369.32	241.8	228.9	994.61		210.48	617.42	404.93	243.05	362.39		407.53	793.33	158.4			Event #57	227.01			246.2			279.75	438.99	307.22	477.32			304.51
Event #58	263.92	884.2	294.81	349.11			224.55	714.87	360.79	299.5	491.01			1060.63	325.44			Event #58	280.12	372.31	247.89	228.91	995.27		214.18	620.18	407.68	248.73	436.69		411.24	793.65	158.41			Event #58	229.07			248.45			279.76	441.39	307.55	482.71			343.13
Event #59	269.12	884.21	295.1				226.33	716.64	362.96	300.92	491.62			1062.13	325.82			Event #59	283.18	379.22	247.9	229.48	995.8		216.79	620.7	410.62	252.4	436.7		413.93	793.66	206.3			Event #59	229.91			252.6			280	445	310.9	485.16			350.31
Event #60	271.69	898.14	309.7				226.46	721.63	363.23	302.99	491.63			1062.14	326.18			Event #60	285.51	379.23	248.18	229.49	996.4		217.04	624.55	415.62	256.65	462.86		423.5	960.99	207			Event #60	232.8			252.83			292.04	445.01	311.2	492.62			350.32
Event #61	274.38	898.15	314.01				227.31	722.45	363.24	304.29	491.95			1066.71	326.19			Event #61	286.7	393.35	254.81	229.92	998.89		218.24	624.56	418.7	257.28	462.87		426.14	961	207.23			Event #61	232.81			253.27			292.05	445.65	313.08	494.43			364.78
Event #62	276.57	949.14	316.88				230.56	723.22	384.82	327.26	491.96			1078.26				Event #62	289.01	393.36	258.19	297.08	998.9		219.72	663.23	420.72	291.2	463.3		428.74	1011.3	207.24			Event #62	233.18			256.27			309.49	445.66	313.68	499.7			371.55
Event #63	276.99	949.15	320.66				231.21	726.8	384.83	329.82				1078.54				Event #63	290.05	393.97	258.2	298.01	999.91		222.5	663.24	422.83	314.67	463.31		431.74	1011.31	224.5			Event #63	234.12			260.91			311.75	445.94	315.74	502.09			371.56
Event #64	279.49	949.43	320.67				231.8	727.36	385.14	331.2				1078.55				Event #64	292.65	393.98	268.89	298.02	1095.9		226.55	663.64	422.99	318.57	463.92		431.86	1011.58	224.74			Event #64	253.6			275.8			312.3	513.03	316.49	506.12			383.58
Event #65	280.64	998.41					235.39	728.07	385.15	332.37				1078.94				Event #65	293.51	394.65	268.9	311.03	1098.03		228.69	691.23	425.72	320.68	463.93		434.2	1217.72	224.87			Event #65	255.87			276.32			315.65	515.79	316.76	508.31			383.59
Event #66	283.46	998.96					235.65	729.75	438.05	342.76				1085.84				Event #66	295.68	394.68	277.79	311.69	1119.3		246.94	695.25	427.49	321.47	508.79		436.63	1217.73	224.88			Event #66	256.94			277.86			316.47	518.37	318.29	510.44			406.07
Event #67	338.83	999.43					237.36	730.44	438.06	374.33				1085.85				Event #67	296.79	454.31	281.4	311.7	1127.73		248.54	698.28	427.65	324.14	508.99		436.64	1218.01	225.32			Event #67	261.19			278.13			318.72	520.4	328.63	513.31			406.23
Event #68	338.84	999.81					238.94	731.3	438.4	374.6								Event #68	297.48	454.32	281.41	325.4	1132.61		250.7	700.25	430.67	324.32	509		436.93	1250.92	225.33			Event #68	261.52			280.01			318.73	520.91	455.9	515.84			408.71
Event #69	339.09	999.82					238.95	733	438.41	375.35								Event #69	299.86		281.73	325.41	1133.79		251	701.14	430.79	327.92			436.94	1250.93	225.6			Event #69	263.54			283.13			333.42	523.5	458.22	518.02			408.72
Event #70	353.59	1016.45					240	733.81	485.28	375.55								Event #70	301.49		295.16	339.66	1133.8		252.99	704.14	433.34	328.23			437.18	1251.31	261.35			Event #70	264.22			283.69			333.98	525.63	462.56	518.38			427.29
Event #71	353.6	1016.6					240.01	735.68	485.29	378.3								Event #71	302.77		298.65	339.67	1134.18		253.28	706.84	433.46	328.91			490.03	1251.32	261.73			Event #71	265.9			284.3			335.95	527.84	465.51	531.67			427.41
Event #72	353.97	1016.61					240.47	745	485.67	378.95								Event #72	302.78		306.5		1134.19		256.1	711.79	436.27	334.44			490.04		264.27			Event #72	266.45			288.27			337.82	534.07	465.69	533.28			429.81
Event #73	384.05	1016.91					288.24	745.48	485.68	381.64								Event #73	330.03		309.03		1134.56		256.56	713.62	444.21	334.65			490.59		264.57			Event #73	269.74			290.45			338.72	542.6	468.05	537.53			429.82
Event #74	384.06	1065.81					315.01	746.8	490.81	381.94								Event #74	330.04		311.79		1136.64		258.87	715.64	447.82	340.17			503.52		264.58			Event #74	285.03			290.83			341.12	544.81	470.28	541.72			430.2
Event #75	405.81	1065.82					315.02	747.79	490.82	382.86								Event #75	330.37		314.83		1136.99		258.88	715.65	451.05	340.29			506.28		264.88			Event #75	285.04			291.39			341.78	547.31	470.47	544.22			447.45
Event #76	417.6	1083.13					315.4	748.74	665.71	385.53								Event #76	359.4		320.4		1137		260.49	716.03	453.36	341.02			511.59		300.35			Event #76	302.76			293.38			342.66	548.09	473.29	547.06			464.56
Event #77	421.74	1083.94					316.85	748.89	673.14	386.24								Event #77	367.05		320.41		1137.49		260.74	716.04	462.82	343.17			511.6		300.55			Event #77	302.77			293.9			345.36	550.45	473.3	547.2			467.64
Event #78	421.9	1083.95					317.18	749.01	676.89	388.15								Event #78	367.06				1258.3		260.75	795.75	464.52	344.1			512.02		300.64			Event #78	321.38			294.58			346.04	550.99	538.18	549.3
Event #79	424.98	1084.86					317.6	749.13	677.5	388.61								Event #79	388.34				1265.22		293.1	798.06	466.78	367.12			512.03		300.77			Event #79	324.03			294.59			348.05	552.96	538.19	549.64
Event #80	437.86	1087.83					382.86	749.27	680.49	390.37								Event #80	388.35				1265.23		310.02	798.07	626.37	379			576.89		303.45			Event #80	324.04			305.16			348.56	552.97	576.21	551.52
Event #81	441.08	1088.38					384.13	749.81	680.5	396.66								Event #81	414.27				1323.87		310.14	815.78	630.3	401.95			590.33		303.63			Event #81	324.38			307.06			348.98	553.4	576.22	551.53
Event #82	443.69	1088.71					396.42	751.61	713.98	396.89								Event #82	414.28				1335.25		311.07	818.47	763.17	404.7			590.34		305.84			Event #82	324.39			307.69			351.08	595.3	601.09	551.95
Event #83	443.7	1090.35					396.56	751.62	713.99	397.12								Event #83	435.73				1337.95		311.85	818.48	769.64	405.8			612.15		306.17			Event #83	355.1			308.31			354.26	598.87	604.27	551.96
Event #84	469.02	1093.42					397.79	752.3		397.85								Event #84	435.74				1337.96		316.72	841.04	899.15	413.8			612.51		308.56			Event #84	357.8			312.73			361.21	604.43	604.28	637.62
Event #85	469.03	1094.18					403.01	752.31		563.46								Event #85	468.29				1338.47		324.03	843.52	899.89	416.05			615.78		308.57			Event #85	357.81			313.19			382.97	604.44	631.56	637.63
Event #86	469.45	1094.71					404.86	868.02		582.9								Event #86	468.3				1338.48		326.27	843.53	905.92	416.57			622.87		308.97			Event #86	379.94			314.56			384.5	624.22	631.57	663.72
Event #87	483.73	1095.06					405.32	868.03		583.67								Event #87	476.58				1339.09		327.95	876.83	906.12	416.78			623.84		309.11			Event #87	379.95			316.65			384.51	627.38	653.94	669.34
Event #88	483.74	1097.44					406.33	869.1		583.8								Event #88	476.59				1339.1		330.28	876.84	915.29	417.03			628.21		309.27			Event #88	400.14			322.11			398.74	629.99	660.28	702.9
Event #89	543.52	1099.91					420.11	870.65		584.03								Event #89	490.25				1339.78		335.91	890.29	919.69	420.22			628.22		309.42			Event #89	400.15			323.37			403.58	633.03	665.15	707.64
Event #90	543.53	1101.85					453.77	871.4		584.78								Event #90	490.26				1339.79		341.91	890.3	919.79	420.23			628.64		320.78			Event #90				323.95			405.44	635.82	670.21	709.94
Event #91	550.5	1102.1					455.72	933.64		585.7								Event #91	524.68				1411.53		341.92	890.54	922.47	455.95			628.65		323.57			Event #91				324.31			406.05	639.11	670.42	712.3
Event #92	550.51	1103.8					465.74	946.84		585.71								Event #92	528.21				1411.54		370.51	912.94	925.55	455.96					323.58			Event #92				350.27			408.09	641.84	676.47	718.37
Event #93	580.51	1103.81					467.93	947.94		586.13								Event #93	530.26				1411.83		370.52	912.95	927.78	491.68					323.82			Event #93				350.96			411.15	641.85	676.48	724.28
Event #94	580.52						467.94	949.01		641.91								Event #94	530.27				1411.84		382.13	913.23	927.95	491.69					324.25			Event #94				354.02			411.72	642.2	713.58	727.17
Event #95	606.72						470	953.63		646.27								Event #95					1469.67		382.14	950.1	930.5	492.04					324.26			Event #95				354.44			412.05	645.05	713.59	730.23
Event #96	609.62						470.52	955.16		648.13								Event #96					1469.68		395.04	950.66	933.31	492.05					368.38			Event #96				355.29			417.25	645.06	754.2	731.21
Event #97	609.63						573.95	959.91		648.37								Event #97					1469.94		401.58	950.67	933.7	492.37					368.68			Event #97				355.71			417.26	692.25	754.21	751.8
Event #98	627.93						574.33	960.93		654.25								Event #98					1469.95		401.84	963.56	935.84	531.74					371.14			Event #98				358.35			427.91	711.09	780.19	751.81
Event #99	627.94						574.34	962.7		654.41								Event #99							404.44	966.41	938.77	531.91					371.32			Event #99				358.74			430.22	711.1	780.2	767.57
Event #100							596.7	966.4		657.04								Event #100							408.38	966.42	940.93	535.78					371.53			Event #100				359.27			430.72	721.22	799.72	772.69
Event #101							596.71	966.66		657.17								Event #101							411.3	980.62	947.81	535.79					371.87			Event #101				359.81			434.07	723.72	802.77	772.7
Event #102							597.1	967.8		658.4								Event #102							415.18	984.21	947.82	536.06					373.78			Event #102				361.35			434.42	727.09	805.54
Event #103							597.11	968.56		661.02								Event #103							422.95	987.32	948.23	561.67					374.07			Event #103				361.92			436.18	730.5	805.55
Event #104							640.51	974.78		663.04								Event #104							426.84	990.01	1021.93	561.85					374.21			Event #104				373.71			436.43	730.51	824.61
Event #105							640.8	976.33		663.33								Event #105							427.01	994.09	1021.94	561.86					374.8			Event #105				373.72			438.46		830.29
Event #106							640.81	979.26		664.41								Event #106							430.89	995.88	1049.3	585.79					377.26			Event #106				374.32			438.91		833.49
Event #107							657.49	981.77		664.77								Event #107							431.03	998.78	1049.31	588.18					377.27			Event #107				374.75			441.71		835.74
Event #108							657.5	981.78		665.66								Event #108							434.25	998.79	1049.81	646.19					377.75			Event #108				385.84			446.35		838.55
Event #109							675.47	982.09		670.08								Event #109							436.83		1076.05	649.57					380.32			Event #109				386.84			448.45		841.41
Event #110							675.48	984.1		670.52								Event #110							438.92		1079.44	651.98					409.03			Event #110				390.71			455.25		848.55
Event #111							700.51	984.11		670.67								Event #111							444.64		1082.15	654.24					411.31			Event #111				391.59			457.35		853.65
Event #112							700.52	984.5		672.17								Event #112							447.23		1085.37	654.25					413.9			Event #112				392.67			458.29		856.16
Event #113							700.92	984.51		672.98								Event #113							449.09		1088.6	656.76					414.36			Event #113				392.68			461.83		858.71
Event #114							700.93	984.82		673.62								Event #114							451.09		1091	657.02					416.84			Event #114				393.04			461.84		860.75
Event #115							733.23	984.83		675.38								Event #115							454.91		1095.09	703.37					417.32			Event #115				400.83			472.36		863.18
Event #116							733.24	1100.45		676.48								Event #116							455.28		1097.99	705.54					417.91			Event #116				401.96			474.53		865.45
Event #117							750.12	1103.88		680.64								Event #117							455.6		1100.69	707.73					419.23			Event #117				401.97			474.54		868.21
Event #118							766.03	1103.89		683.59								Event #118							457.99		1100.96	710.22					419.45			Event #118				402.3			475.08		871.08
Event #119							780.81			693.75								Event #119							460.25		1103.87	710.73					421.76			Event #119				426.89			491.74		876.07
Event #120							787.44			695.4								Event #120							464.52		1106.2	712.77					423.69			Event #120				427.4			495.53		878.85
Event #121							787.45			695.81								Event #121							467.76		1108.58	713.07					423.7			Event #121				429.9			495.91		881.34
Event #122							787.69			696.51								Event #122							471.36		1108.59	715.29					447.71			Event #122				430.16			498.1		890.66
Event #123							803.97			696.69								Event #123							472.23		1136.25	717.61					447.98			Event #123				433.08			499.88		893.64
Event #124							803.98			699.43								Event #124							474.84		1140.86	722.44					447.99			Event #124				435.69			500.26		893.81
Event #125							804.23			699.56								Event #125							477.16		1143.88	724.2					448.32			Event #125				441.47			502.44		894.13
Event #126							821.05			699.79								Event #126							477.97		1147.29	726.95					460			Event #126				441.84			504.76		897.24
Event #127							826.35			701.42								Event #127							478.96		1147.45	728.53					461.16			Event #127				444.17			508.8		899.59
Event #128							826.36			701.59								Event #128							479.27		1149.75	728.68					461.17			Event #128				444.36			510.28		906.73
Event #129										702.06								Event #129							480.63		1152.12	734.39								Event #129				444.82			523.01		908.6
Event #130										702.34								Event #130							480.81		1152.3	734.54								Event #130				445.37			526.76		910.84
Event #131										702.72								Event #131							483.08		1155.47	734.68								Event #131				449.3			529.84		913.77
Event #132										706.07								Event #132							484.98		1157.72	736.16								Event #132				449.65			533.42		916.68
Event #133										707.01								Event #133							487.14		1157.88	736.4								Event #133				450			536.41		916.87
Event #134										707.79								Event #134							488.99		1160.27	736.66								Event #134				450.63			536.97		917.26
Event #135										708.54								Event #135							492.78		1162.63	737								Event #135				454.61			537.47		920.82
Event #136										713.47								Event #136							494.52		1162.76	738.98								Event #136				454.91			543.59		929.74
Event #137										714.76								Event #137							496.63		1165.87	739.14								Event #137				457.31			543.96		931.91
Event #138										716.35								Event #138							498.88		1168.4	739.63								Event #138				457.65			544.94		931.92
Event #139										716.46								Event #139							498.89		1172.44	739.81								Event #139				458.21			547.69		932.31
Event #140										717.88								Event #140							501.83		1172.65	742.45								Event #140				458.81			548.41		959.92
Event #141										719.73								Event #141							501.84		1176.66	742.62								Event #141				460.94			550.69		962.17
Event #142										720.22								Event #142							502.12		1179.07	744.92								Event #142				461.79			551.09		966.92
Event #143										723.79								Event #143							523.71		1179.35	747.65								Event #143				462.53			551.28		969.39
Event #144										724.61								Event #144							523.72		1197.75	748.09								Event #144				466.04			555.91		971.93
Event #145										724.78								Event #145							542.64		1204.06	751.79								Event #145				467.4			556.64		974.09
Event #146										725.03								Event #146							542.65		1204.35	752.43								Event #146				469.16			567.62		976.45
Event #147										728.75								Event #147							556.02		1209.45	755.67								Event #147				471.53			568.12		979.4
Event #148										731.64								Event #148							579.69		1209.46	758.22								Event #148				472.79			570.1		981.8
Event #149										741.1								Event #149							579.82		1265.77	758.23								Event #149				473.5			572.58		984.02
Event #150										749.51								Event #150							604.96		1265.78	758.85								Event #150				474.21			574.31		986.95
Event #151										750.48								Event #151							607.9		1266.02	759.2								Event #151				476.02			574.75		989.57
Event #152										751.13								Event #152							609.98		1295.96	782.29								Event #152				476.16			582.53		992.28
Event #153										753.3								Event #153							612.45		1305.64	784.38								Event #153				476.93			617.03		995.26
Event #154										755.27								Event #154							612.46		1305.65	786.8								Event #154				486.23			619.68		997.52
Event #155										755.44								Event #155							622.31		1341	788.72								Event #155				486.74			621.59		999.48
Event #156										756.57								Event #156							622.42		1341.01	789.36								Event #156				487.91			622.24		1002.11
Event #157										756.58								Event #157							625.32		1341.28	792.36								Event #157				488.46			625.46		1004.36
Event #158										757.03								Event #158							627.32		1358.57	793.37								Event #158				489.32			625.47		1006.12
Event #159										785.56								Event #159							631.24		1358.58	794.98								Event #159				489.87					1008.04
Event #160										786.13								Event #160							631.89		1385.32	795.13								Event #160				492.2					1010.24
Event #161										799.31								Event #161							634.15		1388.77	795.58								Event #161				493.05					1014.14
Event #162										807.76								Event #162							639.04		1391.21	795.75								Event #162				495.62					1016.7
Event #163										808.35								Event #163							641.2		1391.22	796.85								Event #163				495.63					1016.71
Event #164										821.64								Event #164							642.44		1415.4	797.02								Event #164									1017.09
Event #165										823.51								Event #165							642.83		1415.41	799.01								Event #165									1017.1
Event #166										823.62								Event #166							649.94		1415.72	799.57								Event #166									1017.65
Event #167										830.12								Event #167							650.16		1438.2	799.79								Event #167									1018.31
Event #168										843.22								Event #168							652.09		1443.85	802.38								Event #168									1018.32
Event #169										843.64								Event #169							654.18		1446.57	804.66								Event #169									1018.71
Event #170										844.07								Event #170							663.85		1448.77	827.14								Event #170									1018.72
Event #171										844.08								Event #171							667.47		1451.72	829.76
Event #172										951.62								Event #172							668.93		1451.73	833.39
Event #173										951.63								Event #173							669.93		1463.2	836.29
Event #174										979.11								Event #174							672.01		1466.36	837.96
Event #175										979.12								Event #175							675.55		1469.39	838.21
Event #176										1033.57								Event #176							677.55		1472.79	841.08
Event #177										1033.58								Event #177							679.85		1478.25	843.36
Event #178										1084.61								Event #178							681.65		1478.26	848.9
Event #179										1084.62								Event #179							683.47		1514.46	850.93
Event #180										1087.07								Event #180							683.72		1517.05	851.18
Event #181										1087.08								Event #181							708.73		1523.38	852.69
Event #182										1087.7								Event #182							713.07		1526.24	852.85
Event #183										1167.11								Event #183							715.22		1526.52	855.15
Event #184										1172.98								Event #184							719.16		1530.2	855.9
Event #185										1172.99								Event #185							722.98		1532.1	859.69
Event #186										1196.23								Event #186							725.48		1532.26	859.94
Event #187										1200.07								Event #187							728.32		1534.72	864.74
Event #188										1200.32								Event #188							730.38		1536.64	866.71
Event #189										1200.33								Event #189							731.99		1539.26	866.9
Event #190										1200.63								Event #190							741		1539.27	869.24
Event #191										1225.3								Event #191							742.31		1560.5	869.45
Event #192										1225.31								Event #192							742.62		1565.39	872.61
Event #193										1252.21								Event #193							745.48		1565.4	874.51
Event #194										1252.22								Event #194							747.27		1587.46	875.92
Event #195										1275.1								Event #195							747.66		1587.47	876.09
Event #196										1280.05								Event #196							749.5			881.22
Event #197										1280.06								Event #197							751.72			915.43
Event #198										1306.92								Event #198							753.18			916.91
Event #199										1309.44								Event #199							754.79			922.86
Event #200										1309.45								Event #200							759.19			925.06
																		Event #201							759.79			927.14
																		Event #202							761.16			927.75
																		Event #203							761.17			930.34
																		Event #204							775.92			931.16
																		Event #205							778.53			931.32
																		Event #206							780.26			934.1
																		Event #207							780.27			1001.45
																		Event #208							780.57			1012.21
																		Event #209							796.85			1015.08
																		Event #210							796.86			1016.77
																		Event #211							814.53			1019.02
																		Event #212							814.54			1021.38
																		Event #213							831.08			1021.75
																		Event #214							833.54			1024.07
																		Event #215							837.88			1026.03
																		Event #216							841.3			1026.54
																		Event #217							844.29			1027.95
																		Event #218							846.16			1028.13
																		Event #219							846.4			1029.68
																		Event #220							864.87			1029.88
																		Event #221							870.74			1031.63
																		Event #222							873.12			1031.78
																		Event #223							875.36			1033.99
																		Event #224							877.39			1034.23
																		Event #225							877.76			1035.46
																		Event #226							877.77			1039.37
																		Event #227							885.29			1041.66
																		Event #228							888.77			1042.11
																		Event #229							889.1			1044.27
																		Event #230							896.27			1045.73
																		Event #231							898.33			1046.61
																		Event #232							900.49			1047.41
																		Event #233							901.65			1048.97
																		Event #234							902.22			1049.2
																		Event #235							902.23			1049.61
																		Event #236										1051.28
																		Event #237										1051.64
																		Event #238										1052.16
																		Event #239										1053.55
																		Event #240										1054.21
																		Event #241										1055.26
																		Event #242										1057.39
																		Event #243										1058.07
																		Event #244										1060.51
																		Event #245										1075.25
																		Event #246										1077.26
																		Event #247										1084.3
																		Event #248										1086.09
																		Event #249										1087.31
																		Event #250										1118.58
																		Event #251										1121.33
																		Event #252										1124.24
																		Event #253										1126.24
																		Event #254										1134.14
																		Event #255										1137.52
																		Event #256										1138.85
																		Event #257										1139.24
																		Event #258										1140.99
																		Event #259										1141.24
																		Event #260										1141.4
																		Event #261										1143.5
																		Event #262										1143.7
																		Event #263										1144.02
																		Event #264										1147.15
																		Event #265										1147.26
																		Event #266										1149.75
																		Event #267										1149.95
																		Event #268										1151.86
																		Event #269										1152.36
																		Event #270										1154.97
																		Event #271										1156.74
																		Event #272										1158.36
																		Event #273										1170.81
																		Event #274										1172.93
																		Event #275										1173.32
																		Event #276										1198.83
																		Event #277										1200.9
																		Event #278										1225.66
																		Event #279										1231.27
																		Event #280										1231.37
																		Event #281										1233.09
																		Event #282										1234.37
																		Event #283										1234.52
																		Event #284										1236.8
																		Event #285										1237.55
																		Event #286										1237.72
																		Event #287										1239.66
																		Event #288										1240.13
																		Event #289										1240.59
																		Event #290										1242.17
																		Event #291										1244.44
																		Event #292										1244.64
																		Event #293										1245.02
																		Event #294										1248.69
																		Event #295										1252.15
																		Event #296										1252.73
																		Event #297										1255.24
																		Event #298										1256.67
																		Event #299										1258.07
																		Event #300										1258.4
																		Event #301										1258.72
																		Event #302										1258.86
																		Event #303										1312.38
																		Event #304										1314.75
																		Event #305										1317.1
																		Event #306										1320.25
																		Event #307										1323.03
																		Event #308										1344.86
																		Event #309										1346.38
																		Event #310										1348.54
																		Event #311										1348.9
																		Event #312										1349.39
																		Event #313										1399.95
																		Event #314										1402.97
																		Event #315										1405.17
																		Event #316										1407.78
																		Event #317										1409.39
																		Event #318										1411.51
																		Event #319										1412.9
																		Event #320										1413.08
																		Event #321										1414.3
																		Event #322										1414.42
																		Event #323										1414.51
																		Event #324										1414.67
																		Event #325										1416.7
																		Event #326										1417.04
																		Event #327										1417.26
																		Event #328										1418.65
																		Event #329										1421.18
																		Event #330										1423.27
																		Event #331										1423.93
																		Event #332										1424.18
																		Event #333										1424.88
																		Event #334										1429.6
																		Event #335										1431.92
																		Event #336										1432.03
																		Event #337										1432.42
																		Event #338										1432.52
																		Event #339										1530.22
																		Event #340										1530.38
																		Event #341										1540.05
																		Event #342										1602.12
																		Event #343										1605.23
																		Event #344										1612.9
																		Event #345										1615.59
																		Event #346										1618.58
																		Event #347										1629.48
																		Event #348										1632.41
																		Event #349										1640.71
																		Event #350										1678.77
																		Event #351										1697.11
																		Event #352										1699.25
																		Event #353										1699.71
																		Event #354										1700.28
																		Event #355										1700.44
																		Event #356										1704.37
																		Event #357										1706.22
																		Event #358										1706.39
																		Event #359										1706.97
																		Event #360										1709.66
																		Event #361										1711.33
																		Event #362										1711.58
																		Event #363										1712.15
																		Event #364										1712.28
																		Event #365										1712.7
																		Event #366										1714.02
																		Event #367										1714.35
																		Event #368										1716.79
																		Event #369										1718.02
																		Event #370										1725.8
																		Event #371										1732.92
																		Event #372										1756.89
[truncated: 178 more columns]
