# Supplementary material for: A corticostriatal deficit promotes temporal distortion of automatic action in ageing
Source: eLife journal article supplement (doi:10.7554/elife.29908), 2017-10-23
Supplement: supp [file elife-29908-supp-v1.zip › elife_poa_e29908_Figure_3_source_data_1.xlsx]

## Sheet: Sequence extracts
\Experiment code: JBG007
\Experiment summary: 8 Aged (A1-8; 20-22 months old) and 8 Young (Y1-8; 2-3 months old) mice (C57-Bl6) were submitted to instrumental training (increasing random ratio schedule of reinfocement). CRF: constant reinforcement; RR5: random ratio 5; RR10: random ratio 10; RR20: random ratio 20. Active lever counterbalanced (Left [L] or Right [R]). \Sequence Trigger: from day 10 of training, an ST prog…
\Data type and description: Five fastest action sequences were isolated in each subject on Test (day 18). Fastest sequences were initially identified in the timestamp dataset (see SourceData2_JBG007_timestamp.xlsx). Actions were identified in the video recordings, and the audio segments containing each isolated sequence were stripped using VLC as indicated in the methods. Real IPI Raw table conta…
\Authors: J Bertran-Gonzalez (ORCID: 0000-0002-3794-1782)
Date:	20130801
	Subject	Lever	Group	Box	Session	Sequence1	Sequence2	Sequence3	Sequence4	Sequence5
	Y3	L	Young	1	1	08:40:30-:41	08:40:48-:58	08:41:05-:25	08:41:29-:47	08:41:55-8:42:23
	Y5	R	Young	3	1	09:11:03-:18	09:11:44-09:12:02	09:12:10-:18	09:12:28-:34	9:12:59-09:13:16
	Y4	L	Young	1	2	09:54:17-:31	09:54:44-:56	09:54:56-09:55:05	09:55:17-:25	09:55:30-:48
	Y2	R	Young	3	2	10:24:28-:44	10:24:48-:59	10:25:24-:37	10:25:40-:46	10:26:03-:10
	A3	L	Aged	5	1	08:51:44-:46	08:51:47-:50	08:51:54-:57	08:51:58-08:52:03	08:52:24-:28
	A5	R	Aged	7	1	09:12:57-09:13:00	09:13:20-:25	09:13:32-:37	09:15:06-:09	09:21:58-09:22:01
	A4	L	Aged	5	2	10:07:08-:10	10:07:11-:15	10:07:16-:19	10:07:19-:22	10:07:24-:27
	A2	R	Aged	7	2	10:24:54-:57	10:30:30-:34	10:30:57-:06	10:32:10-:13	10:32:21-:24
	Y7	L	Young	2	1	08:55:37-08:56:04	08:56:26-:43	08:57:04-:12	08:57:13-:31	08:57:51-56
	Y6	R	Young	4	1	09:25:42-:57	09:26:08-:20	09:26:37-:45	09:26:51-09:27:02	09:27:38-:44
	Y1	L	Young	2	2	10:09:19-:34	10:09:57-10:10:06	10:10:12-:24	10:10:30-:39	10:10:49-:59
	Y8	R	Young	4	2	10:39:36-:43	10:40:03-:16	10:40:16-:24	10:40:30-:43	10:40:54-10:41:07
	A7	L	Aged	6	1	08:57:21-:26	08:57:58-08:58:01	08:58:08-:13	08:58:44-:50	08:58:54-08:59:00
	A6	R	Aged	8	1	09:34:35-:45	09:35:04-:21	09:35:29-:37	09:35:46-:55	09:36:14-:23
	A1	L	Aged	6	2	10:09:29-:32	10:09:55-:58	10:09:58-:02	10:10:04-:10	10:10:45-:51
**	A8	R	Aged	8	2	10:40:15-:19	10:40:26-:29	10:41:16-:19	10:41:28-:33	10:42:06-:12
** huge lag, check video export, times based on sound

## Sheet: Real IPI RAW
	Y3						Y5						Y4						Y2						A3						A5						A4						A2						Y7
Sequence time (sec)	8.251	8.265	16.517	15.478	26.518		13.191	16.877	6.605	4.713	16.179		12.888	9.092	5.895	4.861	16.244		14.236	9.019	11.745	3.128	4.94		2.119	1.661	1.055	2.966	1.942		1.07	3.012	1.6	1.404	1.883		1.074	1.511	1.785	1.622	2.312		1.162	1.989	5.311	0.748	1.317		26.373
	0.216	0.805	1.308	1.101	2.116		0.648	1.13	0.837	0.515	0.861		1.035	0.547	0.775	2.16	0.943		0.507	0.493	0.446	0.435	0.44		0.592	0.783	0.345	0.352	1.094		1.155	1.569	1.37	1.377	0.869		1.134	1.774	0.786	0.977	0.168		1.108	0.937	1.855	1.053	0.598		0.02
	0.707	1.843	1.414	1.543	2.348		0.797	2.139	0.995	0.62	1.264		1.214	0.858	1.532	2.425	2.098		0.663	0.882	0.889	0.786	0.993		0.928	1.148	0.95	0.727	1.501		1.283	1.712	1.528	1.539	1.04		1.247	2.024	0.924	1.156	0.381		1.213	0.993	1.973	1.167	0.712		2.055
	0.986	2.144	1.551	1.858	2.558		1.198	2.284	1.418	1.036	1.458		1.552	0.959	1.677	2.568	2.167		1.138	1.021	1.908	1.124	1.426		1.677	1.192	1.098	1.786	1.938		1.413	1.904	1.667	1.666	1.16		1.752	2.114	1.027	1.253	0.545		1.307	1.102	2.388	1.287	0.847		4.244
	2.269	2.477	1.795	2.125	3.174		1.942	3.056	1.606	1.151	2.161		1.709	1.601	2.026	2.819	2.345		1.864	1.279	2.822	1.64	2.01		2.206	1.729	1.397	1.896	2.532		1.557	2.148	1.81	1.834	1.592		1.849	2.218	1.189	1.339	0.648		1.479	1.429	2.667	1.442	0.952		4.788
	1.976	2.729	1.924	2.37	3.255		2.382	3.201	1.753	1.546	2.308		2.84	1.741	2.228	3.394	2.516		2.471	1.755	3.239	2.455	3.223			1.839		2.936	3.036		1.841	2.299	1.947	2.135	1.692		1.941	2.304	1.283	1.511	0.758		1.567	1.526	2.74	1.56	1.181		5.621
	2.467	3.511	2.935	2.616	4.115		6.225	3.645	1.9	1.682	2.434		3.004	1.932	2.674	3.529	2.72		2.985	2.19	3.735	3.162	3.918			1.952		3.321			2.032	2.659	2.042	2.516	1.822		2.212	2.38	1.374	1.685	0.839		1.687	1.63	2.874	1.666	1.283		6.002
	2.831	4.154	3.513	2.735	4.801		6.434	3.768	2.273	1.834	3.306		3.04	2.017	2.931	3.714	3.257		3.597	2.781	4.222	3.563	4.324			2.446					2.146	3.297	2.504	2.615	2.265			2.478	1.688	1.831	0.931		2.134	1.758	3.011	1.799	1.395		6.877
	2.944	4.307	3.825	3.254	5.859		6.782	4.273	2.598	2.009	3.438		3.627	2.12	3.063	4.055	3.5		4.436	3.409	5.009		5.019								2.223	3.438	2.798	2.783	2.5			2.556	1.752	1.933	1.084		2.27	2.064	3.666		1.545		7.054
	3.115	4.757	5.285	3.38	5.964		6.993	4.442	2.74	2.268	3.61		3.733	2.191	3.252	4.21	3.672		5.353	3.897	5.456		5.38									3.849	2.972		2.631			2.723	1.907	2.156	1.154			2.174	3.768		1.7		7.442
	3.291	6.155	5.414	4.685	6.673		7.564	5.107	2.898	2.576	3.775		5.031	2.51	3.391	4.395	4.205		5.585	4.337	7.839											3.946			2.754			2.816	2.031	2.317	1.255			2.451	3.892		1.915		7.797
	3.741	6.384	5.559	5.547	7.01		7.797	5.273	3.215	2.706	4.005		5.208	2.62	3.614	5.19	4.508		5.84	4.544	8.302											4.58						3.202	2.146	2.496	1.331			2.757	4.771				8.232
	3.952	6.496	5.688	6.452	7.15		8.311	5.539	3.54	3.512	4.541		5.347	3.824	3.82	5.37	5.306		6.27	5.16	8.677																	3.289	2.572	2.597	1.43			2.926	4.878				8.624
	4.515	6.6	6.89	6.733	7.522		8.705	5.694	3.703	3.624	4.643		6.011	5.001	4.206	5.665	5.723		6.369	5.763	8.78																				1.553				5.047				9.204
	4.902	6.91	7.498	7.097	7.789		9.418	6.335	3.85	4.062	5.124		7.549	5.911	4.414	6.851	6.186		6.831	5.853	9.067																				1.655				5.131				9.3
	5.042	8.618	8.19	7.735	8.01		9.978	6.497	3.992	4.2	5.379		7.768	6.145	4.932		6.545		7.859	6.557	9.567																				1.758				5.673				10.198
	5.204	9.072	8.806	8.36	8.782		10.43	7.022	4.313	4.593	5.667		7.92	6.357	5.71		6.836		8.202	7.671	10.164																				1.878				5.784				10.733
	5.429		8.928	8.857	8.923		10.635	7.473	4.841	5.125	6.861		8.037	7.261	5.944		7.477		9.457	8.372	10.638																				1.978				5.936				11.051
	6.293		9.376	9.278	9.019		12.604	7.655	5.315	5.231	6.975		8.215	8.115	6.558		7.609		9.951	9.516	11.094																				2.096				6.088				11.631
	6.986		9.536	9.713	9.117		13.048	7.878	5.59		8.033		8.484	8.231	6.671		7.867		11.839		11.554																				2.481				6.429				11.991
	7.58		9.643	10.442	9.247		13.184	8.468	5.808		8.368		9.689	8.518			8.098		12.237		12.198																								6.562				12.153
	7.724		9.734	10.716	10.143		13.459	8.878	6.399		8.494		9.837	8.714			8.154		12.538																										6.728				12.674
	8.084		9.84	11.424	10.516		13.574	9.177	7.005		8.633		9.984	8.884			8.259		13.021																										7.097				13.109
	8.467		10.038	11.593	10.624		13.705	9.49	7.44		8.913		10.28	9.24			8.525		13.686																										7.159				13.388
			10.935	11.677	10.699		13.843	10.323			9.329		10.41	9.375			8.788		14.574																														14.379
			11.133	12.462	10.916			10.435			9.554		10.629	9.641			9.303		14.755																														14.855
			11.528	13.921	11.261			10.656			13.275		11.143				10.011																																15.161
			12.22	14.797	11.96			11.797			13.729		11.307				10.09																																16.083
			13.597	14.98	13.061			12.039			13.864		11.451				11.697																																16.681
			14.517	15.197	13.214			12.3			13.969		11.88				11.992																																16.947
			14.616	15.471	14.444			12.694			14.15		12.711				14.791																																17.341
			15.011	16.193	14.506			15.876			14.602		13.578				14.904																																17.611
			15.726	16.453	14.756			15.962			14.72		13.731				15.812																																17.975
			15.916	16.579	15.421			16.383			14.847		13.929				17.192																																18.336
			16.038		15.476			16.666			14.988																																						18.835
			17.817		15.996			16.868			15.426																																						19.368
			17.551		16.078			17.068			16.023																																						19.901
			17.817		16.256			17.471			16.169																																						20.149
					17.113			17.592			16.664																																						21.319
					18.068			17.948			17.043																																						22.254
					18.601																																												22.738
					18.96																																												22.804
					20.993																																												23.568
					21.147																																												23.704
					21.261																																												24.273
					22.138																																												25.48
					23.201
					24.063
					24.338
					27.76
					24.986
					25.432
					25.498
					26.06
					26.666
					27.166
					27.437
					27.876
					28.015
					28.631
[truncated: 39 more columns]
