# Supplementary material for: A corticostriatal deficit promotes temporal distortion of automatic action in ageing
Source: eLife journal article supplement (doi:10.7554/elife.29908), 2017-10-23
Supplement: supp [file elife-29908-supp-v1.zip › elife_poa_e29908_Figure_4_source_data_1.xlsx]

## Sheet: Sheet1
\Experiment code: JBG007
\Experiment summary: 8 Aged (A1-8; 20-22 months old) and 8 Young (Y1-8; 2-3 months old) mice (C57-Bl6) were submitted to instrumental training (increasing random ratio schedule of reinfocement). CRF: constant reinforcement; RR5: random ratio 5; RR10: random ratio 10; RR20: random ratio 20. Active lever counterbalanced (Left [L] or Right [R]). \Sequence Trigger: from day 10 of training, the ST pro…
\Data type and description: mapping of p-MAPK immunoreactive neurons in different corticl and striatal regions after 20 minutes of action sequence performance. All young and aged animals were rapidly anesthetized and trasncardially fixed while performing the test (day 18). Coronal sections corresponding to Bregma ~1.7, 1.1 and 0.15 mm (A-P) were collected in each animal, and were counterstained p…
\Authors: Miriam Matamales (ORCID: 0000-0001-9978-0091), Zala Skrbis (ORCID: 0000-0003-1649-9726)
A-P coordinate (mm from Bregma)	Mouse	Slice	Side	Region	ROI #	x	y	area
1.1	A1	2	L	aDS	2	1979	366	279
1.1	A1	2	L	aDS	3	2687	433	244
1.1	A1	2	L	aDS	4	2375	447	176
1.1	A1	2	L	aDS	5	2340	445	175
1.1	A1	2	L	aDS	6	2315	471	234
1.1	A1	2	L	aDS	7	1732	474	203
1.1	A1	2	L	aDS	8	2266	494	286
1.1	A1	2	L	aDS	9	1713	506	259
1.1	A1	2	L	aDS	10	1908	523	195
1.1	A1	2	L	aDS	11	1805	533	281
1.1	A1	2	L	aDS	12	1164	558	587
1.1	A1	2	L	aDS	13	1639	558	288
1.1	A1	2	L	aDS	14	1855	569	315
1.1	A1	2	L	aDS	15	2117	563	311
1.1	A1	2	L	aDS	16	1580	576	207
1.1	A1	2	L	aDS	17	1979	586	336
1.1	A1	2	L	aDS	18	960	585	187
1.1	A1	2	L	aDS	19	1869	603	251
1.1	A1	2	L	aDS	20	1303	605	363
1.1	A1	2	L	aDS	21	2127	611	526
1.1	A1	2	L	aDS	22	1492	610	632
1.1	A1	2	L	aDS	23	1218	604	406
1.1	A1	2	L	aDS	24	1733	609	226
1.1	A1	2	L	aDS	25	2366	608	258
1.1	A1	2	L	aDS	26	1281	614	181
1.1	A1	2	L	aDS	27	1931	624	317
1.1	A1	2	L	aDS	28	2441	637	370
1.1	A1	2	L	aDS	29	1324	636	291
1.1	A1	2	L	aDS	30	2506	638	262
1.1	A1	2	L	aDS	31	1040	642	280
1.1	A1	2	L	aDS	32	1650	651	249
1.1	A1	2	L	aDS	33	2095	656	230
1.1	A1	2	L	aDS	34	895	649	199
1.1	A1	2	L	aDS	35	1861	655	388
1.1	A1	2	L	aDS	36	2297	652	181
1.1	A1	2	L	aDS	37	802	654	204
1.1	A1	2	L	aDS	38	1064	660	192
1.1	A1	2	L	aDS	39	2626	661	261
1.1	A1	2	L	aDS	40	851	661	172
1.1	A1	2	L	aDS	41	1219	661	173
1.1	A1	2	L	aDS	42	2868	665	313
1.1	A1	2	L	aDS	43	1261	672	697
1.1	A1	2	L	aDS	44	2735	667	254
1.1	A1	2	L	aDS	45	1772	673	189
1.1	A1	2	L	aDS	46	2318	674	179
1.1	A1	2	L	aDS	47	1457	684	248
1.1	A1	2	L	aDS	48	2238	679	172
1.1	A1	2	L	aDS	49	1154	683	318
1.1	A1	2	L	aDS	50	2360	689	214
1.1	A1	2	L	aDS	51	1224	697	354
1.1	A1	2	L	aDS	52	2242	701	254
1.1	A1	2	L	aDS	53	1678	700	309
1.1	A1	2	L	aDS	54	785	713	348
1.1	A1	2	L	aDS	55	825	710	208
1.1	A1	2	L	aDS	56	942	713	190
1.1	A1	2	L	aDS	57	1234	717	254
1.1	A1	2	L	aDS	58	883	719	282
1.1	A1	2	L	aDS	59	1406	723	266
1.1	A1	2	L	aDS	60	2254	721	197
1.1	A1	2	L	aDS	61	2328	725	189
1.1	A1	2	L	aDS	62	1836	741	266
1.1	A1	2	L	aDS	63	2067	756	326
1.1	A1	2	L	aDS	64	1339	754	183
1.1	A1	2	L	aDS	65	1433	757	277
1.1	A1	2	L	aDS	66	1363	759	188
1.1	A1	2	L	aDS	67	2411	759	387
1.1	A1	2	L	aDS	68	1586	763	174
1.1	A1	2	L	aDS	69	1989	765	226
1.1	A1	2	L	aDS	70	1625	775	282
1.1	A1	2	L	aDS	71	2267	772	255
1.1	A1	2	L	aDS	72	1338	777	368
1.1	A1	2	L	aDS	73	1250	777	356
1.1	A1	2	L	aDS	74	690	775	220
1.1	A1	2	L	aDS	75	2073	777	180
1.1	A1	2	L	aDS	76	1713	788	231
1.1	A1	2	L	aDS	77	919	793	315
1.1	A1	2	L	aDS	78	1199	802	605
1.1	A1	2	L	aDS	79	1331	796	214
1.1	A1	2	L	aDS	80	1246	805	463
1.1	A1	2	L	aDS	81	1896	801	206
1.1	A1	2	L	aDS	82	1617	802	177
1.1	A1	2	L	aDS	83	1805	815	327
1.1	A1	2	L	aDS	84	1529	812	276
1.1	A1	2	L	aDS	85	1955	810	193
1.1	A1	2	L	aDS	86	2555	817	275
1.1	A1	2	L	aDS	87	1225	825	217
1.1	A1	2	L	aDS	88	2005	829	296
1.1	A1	2	L	aDS	89	2248	830	296
1.1	A1	2	L	aDS	90	1297	837	336
1.1	A1	2	L	aDS	91	984	835	351
1.1	A1	2	L	aDS	92	573	833	264
1.1	A1	2	L	aDS	93	811	834	266
1.1	A1	2	L	aDS	94	1594	838	326
1.1	A1	2	L	aDS	95	861	838	325
1.1	A1	2	L	aDS	96	1612	849	216
1.1	A1	2	L	aDS	97	1079	849	268
1.1	A1	2	L	aDS	98	1635	848	240
1.1	A1	2	L	aDS	99	1904	848	244
1.1	A1	2	L	aDS	100	556	850	362
1.1	A1	2	L	aDS	101	1544	853	380
1.1	A1	2	L	aDS	102	640	854	240
1.1	A1	2	L	aDS	103	757	853	285
1.1	A1	2	L	aDS	104	706	856	310
1.1	A1	2	L	aDS	105	1325	855	170
1.1	A1	2	L	aDS	106	1779	859	435
1.1	A1	2	L	aDS	107	2003	869	606
1.1	A1	2	L	aDS	108	739	871	223
1.1	A1	2	L	aDS	109	1118	894	233
1.1	A1	2	L	aDS	110	1639	890	334
1.1	A1	2	L	aDS	111	2214	894	468
1.1	A1	2	L	aDS	112	1984	887	198
1.1	A1	2	L	aDS	113	1540	896	296
1.1	A1	2	L	aDS	114	638	888	172
1.1	A1	2	L	aDS	115	579	895	227
1.1	A1	2	L	aDS	116	2509	904	190
1.1	A1	2	L	aDS	117	2385	903	408
1.1	A1	2	L	aDS	118	2145	912	312
1.1	A1	2	L	aDS	119	1881	918	348
1.1	A1	2	L	aDS	120	1142	915	232
1.1	A1	2	L	aDS	121	597	917	302
1.1	A1	2	L	aDS	122	769	918	303
1.1	A1	2	L	aDS	123	731	919	298
1.1	A1	2	L	aDS	124	1904	925	235
1.1	A1	2	L	aDS	125	629	929	251
1.1	A1	2	L	aDS	126	1207	932	253
1.1	A1	2	L	aDS	127	1514	939	499
1.1	A1	2	L	aDS	128	1763	935	240
1.1	A1	2	L	aDS	129	2493	941	256
1.1	A1	2	L	aDS	130	2356	945	209
1.1	A1	2	L	aDS	131	2152	942	351
1.1	A1	2	L	aDS	132	2757	943	179
1.1	A1	2	L	aDS	133	1648	963	444
1.1	A1	2	L	aDS	134	1430	955	399
1.1	A1	2	L	aDS	135	1018	958	456
1.1	A1	2	L	aDS	136	1152	955	268
1.1	A1	2	L	aDS	137	1925	959	219
1.1	A1	2	L	aDS	138	1224	961	214
1.1	A1	2	L	aDS	139	2181	968	185
1.1	A1	2	L	aDS	140	1441	975	228
1.1	A1	2	L	aDS	141	1412	989	633
1.1	A1	2	L	aDS	142	939	981	366
1.1	A1	2	L	aDS	143	584	983	173
1.1	A1	2	L	aDS	144	846	992	286
1.1	A1	2	L	aDS	145	1108	993	264
1.1	A1	2	L	aDS	146	1488	1006	206
1.1	A1	2	L	aDS	147	698	1016	564
1.1	A1	2	L	aDS	148	2594	1007	252
1.1	A1	2	L	aDS	149	583	1009	255
1.1	A1	2	L	aDS	150	1164	1010	226
1.1	A1	2	L	aDS	151	2361	1013	272
1.1	A1	2	L	aDS	152	1074	1017	240
1.1	A1	2	L	aDS	153	1045	1019	258
1.1	A1	2	L	aDS	154	960	1026	221
1.1	A1	2	L	aDS	155	552	1030	268
1.1	A1	2	L	aDS	156	979	1033	223
1.1	A1	2	L	aDS	157	1547	1029	186
1.1	A1	2	L	aDS	158	1455	1046	394
1.1	A1	2	L	aDS	159	578	1049	260
1.1	A1	2	L	aDS	160	817	1045	187
1.1	A1	2	L	aDS	161	1028	1051	371
1.1	A1	2	L	aDS	162	1673	1045	181
1.1	A1	2	L	aDS	163	653	1051	269
1.1	A1	2	L	aDS	164	433	1050	271
1.1	A1	2	L	aDS	165	1051	1051	178
1.1	A1	2	L	aDS	166	2129	1058	284
1.1	A1	2	L	aDS	167	977	1058	277
1.1	A1	2	L	aDS	168	519	1061	281
1.1	A1	2	L	aDS	169	1523	1057	280
1.1	A1	2	L	aDS	170	1215	1063	305
1.1	A1	2	L	aDS	171	1652	1065	423
1.1	A1	2	L	aDS	172	700	1078	632
1.1	A1	2	L	aDS	173	581	1069	182
1.1	A1	2	L	aDS	174	1396	1072	357
1.1	A1	2	L	aDS	175	671	1079	362
1.1	A1	2	L	aDS	176	823	1076	294
1.1	A1	2	L	aDS	177	2531	1078	207
1.1	A1	2	L	aDS	178	1071	1082	173
1.1	A1	2	L	aDS	179	1439	1081	217
1.1	A1	2	L	aDS	180	1047	1086	249
1.1	A1	2	L	aDS	181	915	1085	223
1.1	A1	2	L	aDS	182	2397	1087	234
1.1	A1	2	L	aDS	184	2429	1094	251
1.1	A1	2	L	aDS	185	2034	1101	436
1.1	A1	2	L	aDS	186	2845	1111	412
1.1	A1	2	L	aDS	187	1175	1121	764
1.1	A1	2	L	aDS	188	994	1113	245
1.1	A1	2	L	aDS	189	1432	1110	449
1.1	A1	2	L	aDS	190	968	1113	195
1.1	A1	2	L	aDS	191	645	1118	313
1.1	A1	2	L	aDS	192	830	1125	235
1.1	A1	2	L	aDS	193	668	1130	272
1.1	A1	2	L	aDS	194	1753	1131	192
1.1	A1	2	L	aDS	195	770	1138	271
1.1	A1	2	L	aDS	196	919	1144	616
1.1	A1	2	L	aDS	197	1405	1146	388
1.1	A1	2	L	aDS	198	741	1146	349
1.1	A1	2	L	aDS	199	2167	1147	178
1.1	A1	2	L	aDS	200	1156	1155	320
1.1	A1	2	L	aDS	201	1000	1167	368
1.1	A1	2	L	aDS	202	1511	1166	274
1.1	A1	2	L	aDS	203	2448	1171	294
1.1	A1	2	L	aDS	204	1072	1182	1080
1.1	A1	2	L	aDS	205	1858	1176	206
1.1	A1	2	L	aDS	206	788	1175	185
1.1	A1	2	L	aDS	207	2427	1184	287
1.1	A1	2	L	aDS	208	531	1181	639
1.1	A1	2	L	aDS	209	851	1179	251
1.1	A1	2	L	aDS	210	2776	1183	207
1.1	A1	2	L	aDS	212	618	1191	292
1.1	A1	2	L	aDS	213	1000	1189	197
1.1	A1	2	L	aDS	214	1870	1193	276
1.1	A1	2	L	aDS	215	896	1195	199
1.1	A1	2	L	aDS	216	967	1206	792
1.1	A1	2	L	aDS	217	729	1202	339
1.1	A1	2	L	aDS	218	764	1202	317
1.1	A1	2	L	aDS	219	447	1210	354
1.1	A1	2	L	aDS	220	817	1212	259
1.1	A1	2	L	aDS	221	539	1213	212
1.1	A1	2	L	aDS	222	1356	1224	526
1.1	A1	2	L	aDS	223	624	1238	388
1.1	A1	2	L	aDS	224	670	1239	255
1.1	A1	2	L	aDS	225	556	1245	529
1.1	A1	2	L	aDS	226	976	1243	493
1.1	A1	2	L	aDS	229	1257	1246	336
1.1	A1	2	L	aDS	230	583	1248	467
1.1	A1	2	L	aDS	231	1302	1252	573
1.1	A1	2	L	aDS	232	2622	1246	191
1.1	A1	2	L	aDS	233	828	1247	309
1.1	A1	2	L	aDS	234	1076	1248	193
1.1	A1	2	L	aDS	235	1348	1253	178
1.1	A1	2	L	aDS	236	485	1258	482
1.1	A1	2	L	aDS	237	611	1255	176
1.1	A1	2	L	aDS	238	1128	1263	381
1.1	A1	2	L	aDS	239	444	1258	283
1.1	A1	2	L	aDS	240	1785	1265	406
1.1	A1	2	L	aDS	241	999	1275	597
1.1	A1	2	L	aDS	242	791	1284	378
1.1	A1	2	L	aDS	244	531	1280	297
1.1	A1	2	L	aDS	245	829	1291	486
1.1	A1	2	L	aDS	246	2081	1283	316
1.1	A1	2	L	aDS	247	680	1296	831
1.1	A1	2	L	aDS	248	2049	1294	334
1.1	A1	2	L	aDS	249	573	1293	206
1.1	A1	2	L	aDS	250	1173	1304	546
1.1	A1	2	L	aDS	252	1806	1297	178
1.1	A1	2	L	aDS	253	1322	1303	280
1.1	A1	2	L	aDS	254	406	1306	508
1.1	A1	2	L	aDS	255	2190	1314	376
1.1	A1	2	L	aDS	257	477	1319	335
1.1	A1	2	L	aDS	258	909	1325	498
1.1	A1	2	L	aDS	259	1759	1320	478
1.1	A1	2	L	aDS	260	1023	1317	245
1.1	A1	2	L	aDS	261	2551	1325	411
1.1	A1	2	L	aDS	262	2252	1329	221
1.1	A1	2	L	aDS	263	2841	1328	249
1.1	A1	2	L	aDS	265	1016	1344	269
1.1	A1	2	L	aDS	266	2167	1351	532
1.1	A1	2	L	aDS	267	652	1344	249
1.1	A1	2	L	aDS	268	1183	1358	557
1.1	A1	2	L	aDS	269	2044	1351	370
1.1	A1	2	L	aDS	270	547	1359	339
1.1	A1	2	L	aDS	271	366	1363	274
1.1	A1	2	L	aDS	272	760	1377	315
1.1	A1	2	L	aDS	273	1955	1387	302
1.1	A1	2	L	aDS	274	1049	1389	496
1.1	A1	2	L	aDS	275	2200	1385	215
1.1	A1	2	L	aDS	276	499	1388	246
1.1	A1	2	L	aDS	277	1748	1393	474
1.1	A1	2	L	aDS	279	767	1399	201
1.1	A1	2	L	aDS	280	1089	1404	250
1.1	A1	2	L	aDS	281	811	1407	254
1.1	A1	2	L	aDS	282	850	1413	219
1.1	A1	2	L	aDS	283	1359	1416	302
1.1	A1	2	L	aDS	284	2016	1415	321
1.1	A1	2	L	aDS	285	2168	1419	221
1.1	A1	2	L	aDS	286	586	1418	343
1.1	A1	2	L	aDS	287	685	1421	294
1.1	A1	2	L	aDS	288	948	1420	188
1.1	A1	2	L	aDS	289	1785	1426	903
1.1	A1	2	L	aDS	290	785	1425	220
1.1	A1	2	L	aDS	291	663	1431	184
1.1	A1	2	L	aDS	292	571	1435	493
1.1	A1	2	L	aDS	293	2015	1446	495
1.1	A1	2	L	aDS	294	799	1439	223
1.1	A1	2	L	aDS	295	440	1445	548
1.1	A1	2	L	aDS	296	619	1455	390
1.1	A1	2	L	aDS	297	906	1448	217
1.1	A1	2	L	aDS	298	1844	1462	774
1.1	A1	2	L	aDS	299	2120	1458	220
1.1	A1	2	L	aDS	300	811	1460	373
1.1	A1	2	L	aDS	301	1031	1467	251
1.1	A1	2	L	aDS	302	1106	1471	225
1.1	A1	2	L	aDS	303	1131	1470	404
1.1	A1	2	L	aDS	304	565	1473	265
1.1	A1	2	L	aDS	305	2022	1473	315
1.1	A1	2	L	aDS	306	652	1476	286
1.1	A1	2	L	aDS	307	998	1475	256
1.1	A1	2	L	aDS	308	1244	1475	334
1.1	A1	2	L	aDS	310	2041	1481	280
1.1	A1	2	L	aDS	311	1977	1483	235
1.1	A1	2	L	aDS	312	2465	1483	246
1.1	A1	2	L	aDS	313	2384	1493	297
1.1	A1	2	L	aDS	314	1540	1492	434
1.1	A1	2	L	aDS	315	540	1492	183
1.1	A1	2	L	aDS	316	581	1497	199
1.1	A1	2	L	aDS	317	2917	1512	333
1.1	A1	2	L	aDS	318	439	1503	227
1.1	A1	2	L	aDS	319	1057	1502	251
1.1	A1	2	L	aDS	320	555	1507	185
1.1	A1	2	L	aDS	321	1995	1509	220
1.1	A1	2	L	aDS	322	680	1526	351
1.1	A1	2	L	aDS	323	804	1523	341
1.1	A1	2	L	aDS	324	739	1522	234
1.1	A1	2	L	aDS	325	1579	1537	229
1.1	A1	2	L	aDS	327	865	1538	256
1.1	A1	2	L	aDS	328	2446	1544	258
1.1	A1	2	L	aDS	329	2062	1547	275
1.1	A1	2	L	aDS	330	2398	1552	364
1.1	A1	2	L	aDS	331	714	1548	195
1.1	A1	2	L	aDS	335	1294	1566	305
1.1	A1	2	L	aDS	336	1369	1566	231
1.1	A1	2	L	aDS	337	2641	1572	613
1.1	A1	2	L	aDS	338	346	1569	414
1.1	A1	2	L	aDS	339	2144	1570	274
1.1	A1	2	L	aDS	340	2111	1571	174
1.1	A1	2	L	aDS	341	1746	1581	459
1.1	A1	2	L	aDS	342	1017	1579	219
1.1	A1	2	L	aDS	343	1671	1580	283
1.1	A1	2	L	aDS	344	1188	1582	210
1.1	A1	2	L	aDS	345	1842	1586	256
1.1	A1	2	L	aDS	346	1304	1588	213
1.1	A1	2	L	aDS	347	2187	1592	185
1.1	A1	2	L	aDS	348	1328	1599	351
1.1	A1	2	L	aDS	350	927	1595	265
1.1	A1	2	L	aDS	351	555	1598	316
1.1	A1	2	L	aDS	352	2229	1605	260
1.1	A1	2	L	aDS	355	416	1610	290
1.1	A1	2	L	aDS	356	1851	1620	638
1.1	A1	2	L	aDS	357	2471	1615	306
1.1	A1	2	L	aDS	359	2606	1618	349
1.1	A1	2	L	aDS	362	1268	1623	178
1.1	A1	2	L	aDS	363	1221	1631	396
1.1	A1	2	L	aDS	364	1806	1632	423
1.1	A1	2	L	aDS	366	2220	1635	471
1.1	A1	2	L	aDS	367	1319	1642	441
1.1	A1	2	L	aDS	369	1005	1638	342
1.1	A1	2	L	aDS	370	1189	1643	286
1.1	A1	2	L	aDS	371	1764	1640	266
1.1	A1	2	L	aDS	372	1685	1647	458
1.1	A1	2	L	aDS	375	680	1644	215
1.1	A1	2	L	aDS	376	1264	1651	690
1.1	A1	2	L	aDS	377	1386	1652	403
1.1	A1	2	L	aDS	378	1516	1654	231
1.1	A1	2	L	aDS	379	2150	1655	250
1.1	A1	2	L	aDS	381	620	1669	445
1.1	A1	2	L	aDS	382	2229	1659	201
1.1	A1	2	L	aDS	383	1834	1664	296
1.1	A1	2	L	aDS	384	2516	1671	366
1.1	A1	2	L	aDS	385	802	1669	264
1.1	A1	2	L	aDS	386	2739	1667	208
1.1	A1	2	L	aDS	387	2441	1675	444
1.1	A1	2	L	aDS	388	770	1667	207
1.1	A1	2	L	aDS	389	1286	1668	298
1.1	A1	2	L	aDS	390	1919	1670	367
1.1	A1	2	L	aDS	391	1945	1681	779
1.1	A1	2	L	aDS	392	2546	1674	187
1.1	A1	2	L	aDS	393	1390	1678	254
1.1	A1	2	L	aDS	394	948	1678	210
1.1	A1	2	L	aDS	395	1182	1678	224
1.1	A1	2	L	aDS	396	2337	1680	322
1.1	A1	2	L	aDS	397	1665	1681	189
1.1	A1	2	L	aDS	398	967	1683	303
1.1	A1	2	L	aDS	400	2176	1691	520
1.1	A1	2	L	aDS	401	2038	1687	253
1.1	A1	2	L	aDS	402	2273	1689	305
1.1	A1	2	L	aDS	403	578	1700	317
1.1	A1	2	L	aDS	404	392	1699	271
1.1	A1	2	L	aDS	405	1745	1709	524
1.1	A1	2	L	aDS	406	1782	1706	202
1.1	A1	2	L	aDS	407	2468	1707	173
1.1	A1	2	L	aDS	408	1232	1706	284
1.1	A1	2	L	aDS	410	1619	1713	477
1.1	A1	2	L	aDS	411	2205	1708	219
1.1	A1	2	L	aDS	412	2052	1714	213
1.1	A1	2	L	aDS	413	489	1719	340
1.1	A1	2	L	aDS	414	2139	1725	534
1.1	A1	2	L	aDS	415	2180	1723	232
1.1	A1	2	L	aDS	416	633	1718	284
1.1	A1	2	L	aDS	417	443	1721	297
1.1	A1	2	L	aDS	418	1924	1726	216
1.1	A1	2	L	aDS	419	1990	1729	335
1.1	A1	2	L	aDS	420	1197	1730	330
1.1	A1	2	L	aDS	421	1720	1733	362
1.1	A1	2	L	aDS	422	1683	1738	505
1.1	A1	2	L	aDS	423	2393	1736	226
1.1	A1	2	L	aDS	424	1749	1750	577
1.1	A1	2	L	aDS	425	1894	1739	221
1.1	A1	2	L	aDS	426	2592	1738	189
1.1	A1	2	L	aDS	428	2252	1744	226
1.1	A1	2	L	aDS	430	1368	1753	221
1.1	A1	2	L	aDS	431	1158	1756	353
1.1	A1	2	L	aDS	432	1959	1754	303
1.1	A1	2	L	aDS	433	2544	1750	202
1.1	A1	2	L	aDS	435	384	1760	215
1.1	A1	2	L	aDS	436	1343	1775	443
1.1	A1	2	L	aDS	437	1720	1778	256
1.1	A1	2	L	aDS	438	2304	1778	305
1.1	A1	2	L	aDS	439	1447	1775	216
1.1	A1	2	L	aDS	440	2272	1779	397
1.1	A1	2	L	aDS	442	1635	1787	272
1.1	A1	2	L	aDS	443	2091	1792	252
1.1	A1	2	L	aDS	444	1099	1798	592
1.1	A1	2	L	aDS	446	1769	1793	208
1.1	A1	2	L	aDS	447	680	1794	170
1.1	A1	2	L	aDS	448	1219	1797	203
1.1	A1	2	L	aDS	449	486	1804	356
1.1	A1	2	L	aDS	450	401	1804	287
1.1	A1	2	L	aDS	451	2392	1799	176
1.1	A1	2	L	aDS	452	760	1800	202
1.1	A1	2	L	aDS	453	2215	1805	324
1.1	A1	2	L	aDS	454	2260	1803	204
1.1	A1	2	L	aDS	455	1161	1809	249
1.1	A1	2	L	aDS	456	723	1814	312
1.1	A1	2	L	aDS	457	1113	1816	319
1.1	A1	2	L	aDS	458	2017	1815	276
1.1	A1	2	L	aDS	459	1835	1827	385
1.1	A1	2	L	aDS	460	2605	1835	715
1.1	A1	2	L	aDS	461	2360	1829	328
1.1	A1	2	L	aDS	463	1169	1846	638
1.1	A1	2	L	aDS	464	792	1840	223
1.1	A1	2	L	aDS	465	2078	1840	248
1.1	A1	2	L	aDS	466	508	1841	204
1.1	A1	2	L	aDS	467	754	1845	311
1.1	A1	2	L	aDS	468	1000	1857	490
1.1	A1	2	L	aDS	469	1256	1845	315
1.1	A1	2	L	aDS	470	2261	1851	375
1.1	A1	2	L	aDS	471	2570	1846	170
1.1	A1	2	L	aDS	473	2330	1849	359
1.1	A1	2	L	aDS	474	810	1853	325
1.1	A1	2	L	aDS	475	1072	1855	224
1.1	A1	2	L	aDS	476	830	1865	385
1.1	A1	2	L	aDS	477	908	1863	326
1.1	A1	2	L	aDS	478	338	1861	282
1.1	A1	2	L	aDS	479	2422	1877	721
1.1	A1	2	L	aDS	480	445	1867	190
1.1	A1	2	L	aDS	481	2558	1866	187
1.1	A1	2	L	aDS	482	2604	1868	238
1.1	A1	2	L	aDS	483	1818	1871	287
1.1	A1	2	L	aDS	484	1729	1877	403
1.1	A1	2	L	aDS	485	1936	1878	324
1.1	A1	2	L	aDS	486	933	1874	207
1.1	A1	2	L	aDS	487	618	1884	281
1.1	A1	2	L	aDS	488	1830	1890	190
1.1	A1	2	L	aDS	489	510	1888	247
1.1	A1	2	L	aDS	490	1025	1897	483
1.1	A1	2	L	aDS	491	1076	1893	268
1.1	A1	2	L	aDS	492	2160	1910	1018
1.1	A1	2	L	aDS	493	845	1902	354
1.1	A1	2	L	aDS	494	1280	1901	337
1.1	A1	2	L	aDS	495	569	1905	230
1.1	A1	2	L	aDS	496	2062	1908	280
1.1	A1	2	L	aDS	497	1111	1912	280
1.1	A1	2	L	aDS	498	404	1921	308
1.1	A1	2	L	aDS	499	889	1921	313
1.1	A1	2	L	aDS	500	2080	1922	359
1.1	A1	2	L	aDS	501	707	1919	353
1.1	A1	2	L	aDS	502	2942	1923	250
1.1	A1	2	L	aDS	503	1195	1920	235
1.1	A1	2	L	aDS	504	503	1923	174
1.1	A1	2	L	aDS	505	1891	1930	360
1.1	A1	2	L	aDS	506	794	1933	319
1.1	A1	2	L	aDS	507	452	1931	211
1.1	A1	2	L	aDS	508	613	1932	172
1.1	A1	2	L	aDS	509	1838	1938	354
1.1	A1	2	L	aDS	510	1163	1944	619
1.1	A1	2	L	aDS	511	2111	1943	601
1.1	A1	2	L	aDS	514	775	1953	322
1.1	A1	2	L	aDS	515	333	1953	188
1.1	A1	2	L	aDS	516	616	1968	778
1.1	A1	2	L	aDS	517	454	1962	374
1.1	A1	2	L	aDS	518	875	1971	648
1.1	A1	2	L	aDS	519	1207	1965	399
1.1	A1	2	L	aDS	520	1789	1966	407
1.1	A1	2	L	aDS	521	541	1971	320
1.1	A1	2	L	aDS	522	1117	1967	412
1.1	A1	2	L	aDS	523	960	1967	330
1.1	A1	2	L	aDS	524	1369	1972	380
1.1	A1	2	L	aDS	525	2584	1970	238
1.1	A1	2	L	aDS	526	438	1976	285
1.1	A1	2	L	aDS	527	824	1973	170
1.1	A1	2	L	aDS	528	795	1982	305
1.1	A1	2	L	aDS	529	2100	1979	234
1.1	A1	2	L	aDS	530	573	1979	220
1.1	A1	2	L	aDS	531	1343	1985	376
1.1	A1	2	L	aDS	532	1820	1981	189
1.1	A1	2	L	aDS	533	1763	1991	199
1.1	A1	2	L	aDS	534	277	1993	230
1.1	A1	2	L	aDS	536	1711	2003	249
1.1	A1	2	L	aDS	538	1311	2000	335
1.1	A1	2	L	aDS	539	1859	2006	194
1.1	A1	2	L	aDS	540	2730	2008	622
1.1	A1	2	L	aDS	542	2381	2019	699
1.1	A1	2	L	aDS	543	2616	2015	248
1.1	A1	2	L	aDS	544	1583	2014	279
1.1	A1	2	L	aDS	545	536	2018	410
1.1	A1	2	L	aDS	546	1690	2018	303
1.1	A1	2	L	aDS	547	1064	2025	429
1.1	A1	2	L	aDS	548	431	2019	225
1.1	A1	2	L	aDS	549	719	2024	369
1.1	A1	2	L	aDS	550	612	2021	179
1.1	A1	2	L	aDS	551	821	2035	452
1.1	A1	2	L	aDS	552	413	2032	298
1.1	A1	2	L	aDS	553	1393	2038	364
1.1	A1	2	L	aDS	554	1505	2039	387
1.1	A1	2	L	aDS	555	1153	2051	427
1.1	A1	2	L	aDS	556	1081	2041	302
1.1	A1	2	L	aDS	557	1968	2049	419
1.1	A1	2	L	aDS	558	1930	2059	414
1.1	A1	2	L	aDS	559	1380	2058	275
1.1	A1	2	L	aDS	560	1817	2063	332
1.1	A1	2	L	aDS	561	745	2076	743
1.1	A1	2	L	aDS	562	818	2076	855
1.1	A1	2	L	aDS	563	971	2065	193
1.1	A1	2	L	aDS	564	1438	2074	500
1.1	A1	2	L	aDS	565	1228	2084	476
1.1	A1	2	L	aDS	566	1071	2086	574
1.1	A1	2	L	aDS	567	783	2087	262
1.1	A1	2	L	aDS	568	1747	2091	333
1.1	A1	2	L	aDS	569	1118	2093	195
1.1	A1	2	L	aDS	570	1989	2094	230
1.1	A1	2	L	aDS	571	2878	2092	203
1.1	A1	2	L	aDS	572	590	2102	441
1.1	A1	2	L	aDS	573	1440	2101	244
1.1	A1	2	L	aDS	574	1213	2123	450
1.1	A1	2	L	aDS	575	1173	2118	197
1.1	A1	2	L	aDS	576	1146	2122	381
1.1	A1	2	L	aDS	577	895	2125	206
1.1	A1	2	L	aDS	578	694	2125	337
1.1	A1	2	L	aDS	580	336	2134	235
1.1	A1	2	L	aDS	581	639	2139	282
1.1	A1	2	L	aDS	582	1001	2143	381
1.1	A1	2	L	aDS	584	843	2151	344
1.1	A1	2	L	aDS	585	1029	2151	756
1.1	A1	2	L	aDS	586	2817	2149	202
1.1	A1	2	L	aDS	587	591	2148	447
1.1	A1	2	L	aDS	588	815	2149	279
1.1	A1	2	L	aDS	589	724	2154	443
1.1	A1	2	L	aDS	590	2706	2158	194
1.1	A1	2	L	aDS	591	1807	2175	442
1.1	A1	2	L	aDS	592	484	2176	263
1.1	A1	2	L	aDS	594	694	2187	311
1.1	A1	2	L	aDS	595	773	2197	458
1.1	A1	2	L	aDS	596	820	2197	217
1.1	A1	2	L	aDS	598	1587	2202	275
1.1	A1	2	L	aDS	599	951	2198	368
1.1	A1	2	L	aDS	601	2637	2213	214
1.1	A1	2	L	aDS	602	1128	2217	404
1.1	A1	2	L	aDS	604	2698	2219	196
1.1	A1	2	L	aDS	605	2415	2225	404
1.1	A1	2	L	aDS	606	522	2224	233
1.1	A1	2	L	aDS	608	1057	2241	223
1.1	A1	2	L	aDS	609	1259	2246	242
1.1	A1	2	L	aDS	610	998	2253	292
1.1	A1	2	L	aDS	611	845	2258	413
1.1	A1	2	L	aDS	612	1428	2259	301
1.1	A1	2	L	aDS	614	1476	2267	304
1.1	A1	2	L	aDS	615	432	2264	301
1.1	A1	2	L	aDS	616	1018	2268	327
1.1	A1	2	L	aDS	617	960	2275	726
1.1	A1	2	L	aDS	619	610	2274	346
1.1	A1	2	L	aDS	620	1077	2281	307
1.1	A1	2	L	aDS	621	1025	2302	513
1.1	A1	2	L	aDS	623	703	2296	213
1.1	A1	2	L	aDS	625	585	2302	354
1.1	A1	2	L	aDS	626	992	2305	343
1.1	A1	2	L	aDS	628	1677	2312	459
1.1	A1	2	L	aDS	629	909	2310	351
1.1	A1	2	L	aDS	630	502	2318	468
1.1	A1	2	L	aDS	631	672	2308	261
1.1	A1	2	L	aDS	632	621	2318	335
1.1	A1	2	L	aDS	634	2009	2318	281
1.1	A1	2	L	aDS	635	1622	2322	188
1.1	A1	2	L	aDS	636	749	2333	338
1.1	A1	2	L	aDS	637	659	2344	949
1.1	A1	2	L	aDS	638	1057	2344	542
1.1	A1	2	L	aDS	639	888	2339	483
1.1	A1	2	L	aDS	641	1183	2344	368
1.1	A1	2	L	aDS	642	943	2342	210
1.1	A1	2	L	aDS	643	438	2351	318
1.1	A1	2	L	aDS	644	1102	2355	594
1.1	A1	2	L	aDS	645	1742	2346	359
1.1	A1	2	L	aDS	646	1942	2348	244
1.1	A1	2	L	aDS	647	782	2351	274
1.1	A1	2	L	aDS	648	1862	2351	213
1.1	A1	2	L	aDS	649	2031	2359	227
1.1	A1	2	L	aDS	650	1225	2370	316
1.1	A1	2	L	aDS	651	754	2374	347
1.1	A1	2	L	aDS	652	1067	2379	430
1.1	A1	2	L	aDS	653	617	2373	207
1.1	A1	2	L	aDS	654	2066	2381	403
1.1	A1	2	L	aDS	655	1001	2386	509
1.1	A1	2	L	aDS	656	480	2383	392
1.1	A1	2	L	aDS	657	929	2382	218
1.1	A1	2	L	aDS	659	1822	2387	306
1.1	A1	2	L	aDS	660	1023	2392	273
1.1	A1	2	L	aDS	661	2150	2388	245
1.1	A1	2	L	aDS	662	1242	2396	437
1.1	A1	2	L	aDS	663	733	2394	204
1.1	A1	2	L	aDS	666	1301	2401	326
1.1	A1	2	L	aDS	667	1911	2394	199
1.1	A1	2	L	aDS	668	2590	2403	280
1.1	A1	2	L	aDS	669	877	2401	290
1.1	A1	2	L	aDS	670	1217	2404	437
1.1	A1	2	L	aDS	671	2158	2408	424
1.1	A1	2	L	aDS	674	769	2418	344
1.1	A1	2	L	aDS	675	551	2413	198
1.1	A1	2	L	aDS	676	1145	2423	462
1.1	A1	2	L	aDS	677	2133	2412	172
1.1	A1	2	L	aDS	679	1277	2421	253
1.1	A1	2	L	aDS	680	853	2423	312
1.1	A1	2	L	aDS	681	1240	2426	447
1.1	A1	2	L	aDS	683	2172	2428	301
1.1	A1	2	L	aDS	684	721	2437	671
1.1	A1	2	L	aDS	685	1439	2433	246
1.1	A1	2	L	aDS	686	1129	2444	431
1.1	A1	2	L	aDS	687	671	2441	298
1.1	A1	2	L	aDS	688	1665	2439	293
1.1	A1	2	L	aDS	689	782	2445	271
1.1	A1	2	L	aDS	690	1257	2445	372
1.1	A1	2	L	aDS	691	1181	2447	342
1.1	A1	2	L	aDS	692	1425	2454	306
1.1	A1	2	L	aDS	693	1817	2461	591
1.1	A1	2	L	aDS	695	505	2462	356
1.1	A1	2	L	aDS	698	1609	2467	370
1.1	A1	2	L	aDS	700	2102	2475	274
1.1	A1	2	L	aDS	701	1242	2479	294
1.1	A1	2	L	aDS	702	859	2483	355
1.1	A1	2	L	aDS	703	770	2485	174
1.1	A1	2	L	aDS	704	1809	2490	405
1.1	A1	2	L	aDS	705	478	2490	213
1.1	A1	2	L	aDS	706	678	2493	269
1.1	A1	2	L	aDS	707	1491	2494	361
1.1	A1	2	L	aDS	708	916	2502	286
1.1	A1	2	L	aDS	709	995	2502	411
1.1	A1	2	L	aDS	710	2023	2507	307
1.1	A1	2	L	aDS	711	626	2511	371
1.1	A1	2	L	aDS	712	1231	2513	337
1.1	A1	2	L	aDS	713	961	2513	368
1.1	A1	2	L	aDS	715	1483	2520	534
1.1	A1	2	L	aDS	716	739	2519	290
1.1	A1	2	L	aDS	717	938	2536	835
1.1	A1	2	L	aDS	718	1241	2534	428
1.1	A1	2	L	aDS	720	699	2535	258
1.1	A1	2	L	aDS	721	729	2538	287
1.1	A1	2	L	aDS	723	1070	2540	177
1.1	A1	2	L	aDS	726	1737	2552	433
1.1	A1	2	L	aDS	729	1682	2563	259
1.1	A1	2	L	aDS	730	562	2570	182
1.1	A1	2	L	aDS	731	603	2575	336
1.1	A1	2	L	aDS	735	980	2602	676
1.1	A1	2	L	aDS	736	852	2597	252
1.1	A1	2	L	aDS	737	1327	2606	355
1.1	A1	2	L	aDS	739	859	2623	438
1.1	A1	2	L	aDS	740	573	2630	569
1.1	A1	2	L	aDS	741	1329	2636	430
1.1	A1	2	L	aDS	743	1099	2633	416
1.1	A1	2	L	aDS	745	1065	2635	368
1.1	A1	2	L	aDS	747	506	2638	345
1.1	A1	2	L	aDS	748	1403	2645	613
1.1	A1	2	L	aDS	749	824	2647	306
1.1	A1	2	L	aDS	750	786	2651	243
1.1	A1	2	L	aDS	751	996	2651	455
1.1	A1	2	L	aDS	752	416	2652	223
1.1	A1	2	L	aDS	753	1363	2652	459
1.1	A1	2	L	aDS	755	1068	2668	864
1.1	A1	2	L	aDS	757	834	2667	259
1.1	A1	2	L	aDS	758	1265	2667	351
1.1	A1	2	L	aDS	759	1226	2669	478
1.1	A1	2	L	aDS	763	1702	2676	262
1.1	A1	2	L	aDS	765	907	2683	407
1.1	A1	2	L	aDS	766	754	2682	283
1.1	A1	2	L	aDS	767	1305	2693	241
1.1	A1	2	L	aDS	769	770	2701	442
1.1	A1	2	L	aDS	770	524	2700	269
1.1	A1	2	L	aDS	772	837	2704	337
1.1	A1	2	L	aDS	777	877	2733	1192
1.1	A1	2	L	aDS	780	658	2726	457
1.1	A1	2	L	aDS	783	1266	2738	208
1.1	A1	2	L	aDS	785	557	2756	242
1.1	A1	2	L	aDS	786	886	2766	308
1.1	A1	2	L	aDS	787	1067	2766	278
1.1	A1	2	L	aDS	788	946	2767	257
1.1	A1	2	L	aDS	791	622	2791	489
1.1	A1	2	L	aDS	792	1042	2784	414
1.1	A1	2	L	aDS	794	809	2788	590
1.1	A1	2	L	aDS	798	924	2810	403
1.1	A1	2	L	aDS	799	849	2813	578
1.1	A1	2	L	aDS	800	577	2813	231
1.1	A1	2	L	aDS	802	695	2819	297
1.1	A1	2	L	aDS	806	1005	2832	372
1.1	A1	2	L	aDS	809	532	2846	515
1.1	A1	2	L	aDS	812	1094	2861	362
1.1	A1	2	L	aDS	813	1128	2861	352
1.1	A1	2	L	aDS	814	931	2864	416
1.1	A1	2	L	aDS	816	1060	2870	689
1.1	A1	2	L	aDS	818	1002	2869	401
1.1	A1	2	L	aDS	819	453	2869	294
1.1	A1	2	L	aDS	820	966	2868	352
1.1	A1	2	L	aDS	823	631	2879	217
1.1	A1	2	L	aDS	824	1152	2882	369
1.1	A1	2	L	aDS	826	822	2886	225
1.1	A1	2	L	aDS	827	1094	2888	364
1.1	A1	2	L	aDS	829	1144	2902	329
1.1	A1	2	L	aDS	831	735	2917	902
1.1	A1	2	L	aDS	835	645	2914	395
1.1	A1	2	L	aDS	841	838	2941	214
1.1	A1	2	L	aDS	842	565	2943	217
1.1	A1	2	L	aDS	845	1003	2948	380
1.1	A1	2	L	aDS	847	1028	2975	340
1.1	A1	2	L	aDS	849	1246	2981	355
1.1	A1	2	L	aDS	850	963	2980	194
1.1	A1	2	L	aDS	852	848	2990	288
1.1	A1	2	L	aDS	859	1001	3018	174
1.1	A1	2	L	aDS	860	831	3025	403
1.1	A1	2	L	aDS	862	1054	3028	391
1.1	A1	2	L	aDS	864	863	3038	410
1.1	A1	2	L	aDS	868	620	3048	175
1.1	A1	2	L	aDS	869	679	3047	303
1.1	A1	2	L	aDS	873	1060	3074	222
1.1	A1	2	L	aDS	874	861	3084	307
1.1	A1	2	L	aDS	875	778	3084	248
1.1	A1	2	L	aDS	876	821	3101	428
1.1	A1	2	L	aDS	877	1229	3096	261
1.1	A1	2	L	aDS	878	644	3104	272
1.1	A1	2	L	aDS	879	1074	3105	218
1.1	A1	2	L	aDS	880	1215	3114	453
1.1	A1	2	L	aDS	881	991	3116	331
1.1	A1	2	L	aDS	883	888	3115	352
1.1	A1	2	L	aDS	885	1188	3121	377
1.1	A1	2	L	aDS	891	820	3144	370
1.1	A1	2	L	aDS	896	1134	3165	435
1.1	A1	2	L	aDS	900	1069	3183	451
1.1	A1	2	L	aDS	901	860	3187	216
1.1	A1	2	L	aDS	904	1170	3199	638
1.1	A1	2	L	aDS	905	1134	3200	278
1.1	A1	2	L	aDS	907	1066	3208	298
1.1	A1	2	L	aDS	909	873	3212	197
1.1	A1	2	L	aDS	910	815	3222	835
1.1	A1	2	L	aDS	912	942	3222	248
1.1	A1	2	L	aDS	914	1050	3233	176
1.1	A1	2	L	aDS	916	1080	3244	326
1.1	A1	2	L	aDS	918	987	3247	251
1.1	A1	2	L	aDS	921	918	3266	174
1.1	A1	2	L	aDS	924	970	3281	310
1.1	A1	2	L	aDS	925	1073	3276	231
1.1	A1	2	L	aDS	926	1162	3277	326
1.1	A1	2	L	aDS	930	1053	3290	174
1.1	A1	2	L	aDS	931	1086	3295	178
1.1	A1	2	L	aDS	937	981	3322	284
1.1	A1	2	L	aDS	942	1055	3344	257
1.1	A1	2	L	aDS	946	1122	3374	212
1.1	A1	2	L	aDS	951	1091	3402	474
1.1	A1	2	L	aDS	958	982	3439	301
1.1	A1	2	L	aDS	960	938	3441	234
1.1	A1	2	L	aDS	977	1070	3525	241
1.1	A1	2	L	aDS	983	1067	3550	293
1.1	A1	2	L	aDS	1151	1293	3141	313
1.1	A1	2	L	aDS	1152	1281	3074	282
1.1	A1	2	L	aDS	1153	1251	3065	199
1.1	A1	2	L	aDS	1154	1239	3050	336
1.1	A1	2	L	aDS	1155	1220	3045	317
1.1	A1	2	L	aDS	1156	1194	3075	198
1.1	A1	2	L	aDS	1157	1170	3084	227
1.1	A1	2	L	aDS	1158	1151	3107	325
1.1	A1	2	L	aDS	1161	1374	3024	464
1.1	A1	2	L	aDS	1181	1415	2970	250
1.1	A1	2	L	aDS	1194	1301	2943	282
1.1	A1	2	L	aDS	1195	1277	2965	257
1.1	A1	2	L	aDS	1196	1369	2904	371
1.1	A1	2	L	aDS	1197	1469	2912	294
1.1	A1	2	L	aDS	1199	1503	2814	517
1.1	A1	2	L	aDS	1200	1490	2783	256
1.1	A1	2	L	aDS	1201	1484	2749	402
1.1	A1	2	L	aDS	1202	1381	2826	341
1.1	A1	2	L	aDS	1203	1336	2864	330
1.1	A1	2	L	aDS	1207	1757	2686	357
1.1	A1	2	L	aDS	1208	1653	2749	449
1.1	A1	2	L	aDS	1209	1651	2727	262
1.1	A1	2	L	aDS	1210	1513	2729	341
1.1	A1	2	L	aDS	1211	1301	2788	350
1.1	A1	2	L	aDS	1212	1308	2756	413
1.1	A1	2	L	aDS	1213	1361	2739	348
1.1	A1	2	L	aDS	1214	1297	2734	404
1.1	A1	2	L	aDS	1215	1499	2577	324
1.1	A1	2	L	aDS	1216	1465	2580	253
1.1	A1	2	L	aDS	1217	1459	2598	264
1.1	A1	2	L	aDS	1218	1642	2520	469
1.1	A1	2	L	aDS	1219	1656	2615	341
1.1	A1	2	L	aDS	1220	1659	2651	280
1.1	A1	2	L	aDS	1221	1809	2565	368
1.1	A1	2	L	aDS	1222	1861	2554	242
1.1	A1	2	L	aDS	1223	1556	2768	328
1.1	A1	2	L	aDS	1224	1535	2634	257
1.1	A1	2	L	aDS	1225	1499	2623	386
1.1	A1	2	L	aDS	1226	1598	2429	379
1.1	A1	2	L	aDS	1227	1599	2313	628
1.1	A1	2	L	aDS	1228	1973	2404	500
1.1	A1	2	L	aDS	1229	1993	2418	381
1.1	A1	2	L	aDS	1230	2002	2384	147
1.1	A1	2	L	aDS	1233	1475	2845	469
1.1	A1	2	L	aDS	1234	1448	2850	445
1.1	A1	2	L	aDS	1235	1478	2876	318
1.1	A1	2	L	aDS	1236	1448	2882	413
1.1	A1	2	L	aDS	1237	1662	2214	241
1.1	A1	2	L	aDS	1238	1679	2234	326
1.1	A1	2	L	aDS	1239	1754	2230	358
1.1	A1	2	L	aDS	1240	1753	2188	401
1.1	A1	2	L	aDS	1241	1370	1856	403
1.1	A1	2	L	aDS	1242	1464	1954	271
1.1	A1	2	L	aDS	1243	1399	1988	179
1.1	A1	2	L	aDS	1244	1372	2018	207
1.1	A1	2	L	aDS	1245	1597	1880	324
1.1	A1	2	L	aDS	1246	1532	1920	186
1.1	A1	2	L	aDS	1247	1666	1974	215
1.1	A1	2	L	aDS	1248	1498	1702	239
1.1	A1	2	L	aDS	1249	1599	1579	296
1.1	A1	2	L	aDS	1250	1393	1526	323
1.1	A1	2	L	aDS	1251	1755	1610	320
1.1	A1	2	L	aDS	1252	1906	1792	457
1.1	A1	2	L	aDS	1253	1656	2174	328
1.1	A1	2	L	aDS	1254	1604	2053	364
1.1	A1	2	L	aDS	1255	1639	1951	446
1.1	A1	2	L	aDS	1258	1852	2502	386
1.1	A1	2	L	aDS	1259	1416	2505	380
1.1	A1	2	L	aDS	1260	1403	2453	204
1.1	A1	2	L	aDS	1261	1318	2425	255
1.1	A1	2	L	aDS	1264	1350	2947	289
1.1	A1	2	L	aDS	1266	1541	2384	314
1.1	A1	2	L	aDS	1267	1486	2401	396
1.1	A1	2	L	aDS	1269	1316	2988	350
1.1	A1	2	L	aDS	1270	1324	2023	410
1.1	A1	2	L	aDS	1271	1447	1997	203
1.1	A1	2	L	aDS	1272	1471	2026	296
1.1	A1	2	L	aDS	1273	1685	2095	434
1.1	A1	2	L	aDS	1274	1686	2148	397
1.1	A1	2	L	aDS	1275	1325	2236	501
1.1	A1	2	L	aDS	1276	1405	2162	295
1.1	A1	2	L	aDS	1277	1921	2240	306
1.1	A1	2	L	aDS	1278	1463	2148	542
1.1	A1	2	L	aDS	1279	1539	2736	446
1.1	A1	2	L	aDS	1280	1345	1282	385
1.1	A1	2	L	aDS	1281	1161	1390	392
1.1	A1	2	L	aDS	1282	1129	1339	469
1.1	A1	2	L	aDS	1283	1436	1484	393
1.1	A1	2	L	aDS	1284	1389	1588	365
1.1	A1	2	L	aDS	1285	1642	1372	310
1.1	A1	2	L	aDS	1286	1628	1615	359
1.1	A1	2	L	aDS	1287	1634	1668	247
1.1	A1	2	L	aDS	1288	1362	1154	501
1.1	A1	2	L	aDS	1289	1338	1115	290
1.1	A1	2	L	aDS	1290	1596	1263	658
1.1	A1	2	L	aDS	1291	1672	1242	306
1.1	A1	2	L	aDS	1292	2115	1189	342
1.1	A1	2	L	aDS	1293	1378	972	573
1.1	A1	2	L	aDS	1294	1625	731	481
1.1	A1	2	L	aDS	1295	1508	1475	273
1.1	A1	2	L	aDS	1296	1536	1407	241
1.1	A1	2	L	aDS	1297	1537	1433	225
1.1	A1	2	L	aDS	1298	1575	1429	254
1.1	A1	2	L	aDS	1299	1621	1398	410
1.1	A1	2	L	aDS	1300	1726	1424	402
1.1	A1	2	L	aDS	1301	1692	1501	355
1.1	A1	2	L	aDS	1302	1743	1487	366
1.1	A1	2	L	aDS	1303	1340	1360	256
1.1	A1	2	L	aDS	1304	1363	721	269
1.1	A1	2	L	aDS	1305	1407	637	267
1.1	A1	2	L	aDS	1306	1461	490	242
1.1	A1	2	L	aDS	1307	2071	513	317
1.1	A1	2	L	aDS	1308	1592	2279	371
1.1	A1	2	L	aDS	1309	1540	2309	224
1.1	A1	2	L	aDS	1310	1799	2254	364
1.1	A1	2	L	aDS	1311	2037	2255	300
1.1	A1	2	L	aDS	1312	2116	2284	321
1.1	A1	2	L	aDS	1313	1689	1345	430
1.1	A1	2	L	aDS	1314	1698	1318	320
1.1	A1	2	L	aDS	1315	1963	1242	324
1.1	A1	2	L	aDS	1316	1363	450	300
1.1	A1	2	L	aDS	1317	1135	640	528
1.1	A1	2	L	aDS	1318	708	955	321
1.1	A1	2	L	aDS	1319	706	1385	266
1.1	A1	2	L	aDS	1320	769	1334	412
1.1	A1	2	L	aDS	1321	882	1389	296
1.1	A1	2	L	aDS	1322	580	1804	249
1.1	A1	2	L	aDS	1323	496	2128	349
1.1	A1	2	L	aDS	1324	640	2223	404
1.1	A1	2	L	aDS	1325	789	2308	295
1.1	A1	2	L	aDS	1326	803	2290	264
1.1	A1	2	L	aDS	1327	839	2318	298
1.1	A1	2	L	aDS	1328	896	2450	187
1.1	A1	2	L	aDS	1329	890	2469	224
1.1	A1	2	L	aDS	1330	878	2297	366
1.1	A1	2	L	aDS	1331	1306	898	247
1.1	A1	2	L	aDS	1332	1341	894	233
1.1	A1	2	L	aDS	1333	1326	1728	499
1.1	A1	2	L	aDS	1334	1344	2062	460
1.1	A1	2	L	aDS	1398	2288	2352	241
1.1	A1	2	L	aDS	1399	2367	2394	348
1.1	A1	2	L	aDS	1414	2646	2341	332
1.1	A1	2	L	aDS	1415	2387	1936	204
1.1	A1	2	L	aDS	1416	2349	1913	314
1.1	A1	2	L	aDS	1417	2403	2276	268
1.1	A1	2	L	aDS	1418	2453	2341	210
1.1	A1	2	L	aDS	1419	2392	2362	281
1.1	A1	2	L	aDS	1420	2269	2304	205
1.1	A1	2	L	aDS	1421	2256	2332	187
1.1	A1	2	L	aDS	1422	2452	2266	255
1.1	A1	2	L	aDS	1423	2459	2246	192
1.1	A1	2	L	aDS	1424	2548	2366	233
1.1	A1	2	L	aDS	1425	2575	2385	255
1.1	A1	2	L	aDS	1426	2056	2334	183
1.1	A1	2	L	aDS	1427	2095	2346	220
1.1	A1	2	L	aDS	1428	2130	2373	171
1.1	A1	2	L	aDS	1429	2146	2367	149
1.1	A1	2	L	aDS	1430	1909	2370	126
1.1	A1	2	L	aDS	1431	2193	2141	175
1.1	A1	2	L	aDS	1432	1847	2165	198
1.1	A1	2	L	aDS	1433	1857	2174	197
1.1	A1	2	L	aDS	1434	2175	2492	274
1.1	A1	2	L	aDS	1436	2200	2019	225
1.1	A1	2	L	aDS	1437	2256	2274	218
1.1	A1	2	L	aDS	1438	2198	2397	298
1.1	A1	2	L	aDS	1439	2031	1632	294
1.1	A1	2	L	aDS	1440	2017	1664	304
1.1	A1	2	L	aDS	1441	1994	1646	247
1.1	A1	2	L	aDS	1442	2072	1447	247
1.1	A1	2	L	aDS	1443	2201	2053	295
1.1	A1	2	L	aDS	1444	2265	2016	263
1.1	A1	2	L	aDS	1445	2078	2060	179
1.1	A1	2	L	aDS	1446	2286	1114	259
1.1	A1	2	L	aDS	1447	2161	501	257
1.1	A1	2	L	aDS	1448	2665	1431	221
1.1	A1	2	L	aDS	1449	2678	1411	121
1.1	A1	2	L	aDS	1450	2382	1393	172
1.1	A1	2	L	aDS	1451	2247	1915	139
1.1	A1	2	L	aDS	1452	2312	1720	318
1.1	A1	2	L	aDS	1453	2342	2187	220
1.1	A1	2	L	aDS	1454	2270	2226	229
1.1	A1	2	L	aDS	1455	2283	2142	363
1.1	A1	2	L	aDS	1456	2366	2127	303
1.1	A1	2	L	aDS	1459	2297	804	201
1.1	A1	2	L	aDS	1460	1296	476	260
1.1	A1	2	L	aDS	1461	1413	870	232
1.1	A1	2	L	aDS	1462	1455	860	163
1.1	A1	2	L	aDS	1463	1420	1328	265
1.1	A1	2	L	aDS	1464	1572	499	232
1.1	A1	2	L	aDS	1465	1596	540	332
1.1	A1	2	L	aDS	1466	1965	402	388
1.1	A1	2	L	aDS	1467	1811	489	393
1.1	A1	2	L	aDS	1468	1368	2971	344
1.1	A1	2	L	aDS	1469	1374	2945	298
1.1	A1	2	L	aDS	1473	2297	1327	489
1.1	A1	2	R	aDS	3	2242	334	276
1.1	A1	2	R	aDS	4	2343	345	255
1.1	A1	2	R	aDS	5	2510	385	171
1.1	A1	2	R	aDS	6	2444	410	239
1.1	A1	2	R	aDS	7	2455	440	235
1.1	A1	2	R	aDS	8	1506	444	199
1.1	A1	2	R	aDS	9	1596	447	178
1.1	A1	2	R	aDS	10	2306	450	178
1.1	A1	2	R	aDS	11	2249	468	191
1.1	A1	2	R	aDS	12	2419	472	329
1.1	A1	2	R	aDS	13	2738	490	173
1.1	A1	2	R	aDS	14	1594	512	234
1.1	A1	2	R	aDS	15	2093	516	252
1.1	A1	2	R	aDS	16	2224	513	179
1.1	A1	2	R	aDS	17	1610	551	223
1.1	A1	2	R	aDS	18	2148	554	188
1.1	A1	2	R	aDS	19	2550	563	334
1.1	A1	2	R	aDS	20	2185	565	237
1.1	A1	2	R	aDS	21	1876	577	234
1.1	A1	2	R	aDS	22	2086	574	174
1.1	A1	2	R	aDS	23	2388	590	289
1.1	A1	2	R	aDS	24	1591	612	174
1.1	A1	2	R	aDS	25	1615	618	220
1.1	A1	2	R	aDS	26	2245	625	170
1.1	A1	2	R	aDS	27	2692	635	180
1.1	A1	2	R	aDS	28	2324	637	235
1.1	A1	2	R	aDS	29	1628	640	213
1.1	A1	2	R	aDS	30	1597	645	210
1.1	A1	2	R	aDS	31	1449	659	272
1.1	A1	2	R	aDS	32	1712	664	507
1.1	A1	2	R	aDS	33	2088	663	222
1.1	A1	2	R	aDS	34	1480	664	224
1.1	A1	2	R	aDS	35	2384	671	510
1.1	A1	2	R	aDS	36	1784	673	254
1.1	A1	2	R	aDS	37	2230	681	246
1.1	A1	2	R	aDS	38	2056	690	210
1.1	A1	2	R	aDS	39	2389	690	256
1.1	A1	2	R	aDS	40	1566	693	186
1.1	A1	2	R	aDS	41	2952	707	228
1.1	A1	2	R	aDS	42	2375	712	312
1.1	A1	2	R	aDS	43	2200	711	220
1.1	A1	2	R	aDS	44	2330	711	217
1.1	A1	2	R	aDS	45	2884	717	222
1.1	A1	2	R	aDS	46	2517	727	220
1.1	A1	2	R	aDS	47	1472	729	233
1.1	A1	2	R	aDS	48	2356	730	229
1.1	A1	2	R	aDS	49	1769	731	205
1.1	A1	2	R	aDS	50	1861	736	392
1.1	A1	2	R	aDS	51	2367	748	191
1.1	A1	2	R	aDS	52	2391	768	280
1.1	A1	2	R	aDS	53	2698	765	302
1.1	A1	2	R	aDS	54	2320	807	478
1.1	A1	2	R	aDS	55	1431	808	210
1.1	A1	2	R	aDS	56	2555	812	228
1.1	A1	2	R	aDS	57	2092	820	252
1.1	A1	2	R	aDS	58	2477	814	181
1.1	A1	2	R	aDS	59	1802	829	440
1.1	A1	2	R	aDS	60	1715	832	186
1.1	A1	2	R	aDS	61	2072	847	249
1.1	A1	2	R	aDS	62	2892	854	197
1.1	A1	2	R	aDS	63	2009	859	490
1.1	A1	2	R	aDS	64	1518	857	223
1.1	A1	2	R	aDS	65	2150	853	189
1.1	A1	2	R	aDS	66	1847	862	174
1.1	A1	2	R	aDS	67	1536	883	272
1.1	A1	2	R	aDS	68	2195	925	278
1.1	A1	2	R	aDS	69	2468	921	216
1.1	A1	2	R	aDS	70	2510	941	468
1.1	A1	2	R	aDS	71	1853	946	186
1.1	A1	2	R	aDS	72	2208	952	205
1.1	A1	2	R	aDS	73	2905	960	178
1.1	A1	2	R	aDS	74	1690	964	212
1.1	A1	2	R	aDS	75	2342	965	229
1.1	A1	2	R	aDS	76	1383	973	430
1.1	A1	2	R	aDS	77	2212	981	543
1.1	A1	2	R	aDS	78	1894	991	227
1.1	A1	2	R	aDS	79	2430	989	170
1.1	A1	2	R	aDS	80	1693	1000	348
1.1	A1	2	R	aDS	81	1358	1013	193
1.1	A1	2	R	aDS	82	2474	1020	323
1.1	A1	2	R	aDS	83	2341	1024	243
1.1	A1	2	R	aDS	84	2929	1028	208
1.1	A1	2	R	aDS	85	2425	1041	239
1.1	A1	2	R	aDS	86	2673	1039	245
1.1	A1	2	R	aDS	87	1351	1041	209
1.1	A1	2	R	aDS	88	2165	1063	714
1.1	A1	2	R	aDS	89	1464	1060	337
1.1	A1	2	R	aDS	90	2621	1062	221
1.1	A1	2	R	aDS	91	3494	1060	256
1.1	A1	2	R	aDS	92	1713	1065	271
1.1	A1	2	R	aDS	93	2303	1060	344
1.1	A1	2	R	aDS	94	1778	1066	231
1.1	A1	2	R	aDS	95	1325	1066	225
1.1	A1	2	R	aDS	96	2371	1071	187
1.1	A1	2	R	aDS	97	2127	1075	283
1.1	A1	2	R	aDS	98	1979	1078	344
1.1	A1	2	R	aDS	99	1336	1086	196
1.1	A1	2	R	aDS	100	2055	1085	205
1.1	A1	2	R	aDS	101	2193	1101	333
1.1	A1	2	R	aDS	102	2485	1110	240
1.1	A1	2	R	aDS	103	2827	1117	363
1.1	A1	2	R	aDS	104	3436	1121	245
1.1	A1	2	R	aDS	105	1656	1125	484
1.1	A1	2	R	aDS	106	2677	1125	180
1.1	A1	2	R	aDS	107	2489	1133	173
1.1	A1	2	R	aDS	108	1522	1139	177
1.1	A1	2	R	aDS	109	1998	1148	196
1.1	A1	2	R	aDS	110	2898	1143	249
1.1	A1	2	R	aDS	111	2143	1144	230
1.1	A1	2	R	aDS	112	1511	1160	299
1.1	A1	2	R	aDS	113	1545	1161	257
1.1	A1	2	R	aDS	114	2533	1167	518
1.1	A1	2	R	aDS	115	1807	1167	418
1.1	A1	2	R	aDS	116	1391	1166	223
1.1	A1	2	R	aDS	117	2921	1163	275
1.1	A1	2	R	aDS	118	3341	1172	198
1.1	A1	2	R	aDS	119	2085	1176	249
1.1	A1	2	R	aDS	120	3117	1182	249
1.1	A1	2	R	aDS	121	1877	1187	178
1.1	A1	2	R	aDS	122	3143	1196	268
1.1	A1	2	R	aDS	123	1424	1199	255
1.1	A1	2	R	aDS	124	2106	1196	197
1.1	A1	2	R	aDS	125	2512	1198	172
1.1	A1	2	R	aDS	126	1875	1210	457
1.1	A1	2	R	aDS	127	2296	1213	364
1.1	A1	2	R	aDS	128	3308	1209	238
1.1	A1	2	R	aDS	129	3035	1216	354
1.1	A1	2	R	aDS	130	1835	1217	187
1.1	A1	2	R	aDS	131	2378	1225	265
1.1	A1	2	R	aDS	132	1983	1217	256
1.1	A1	2	R	aDS	133	2522	1224	323
1.1	A1	2	R	aDS	134	1864	1229	253
1.1	A1	2	R	aDS	135	2960	1240	481
1.1	A1	2	R	aDS	136	3080	1233	285
1.1	A1	2	R	aDS	137	1774	1232	275
1.1	A1	2	R	aDS	138	2731	1246	270
1.1	A1	2	R	aDS	139	1820	1244	438
1.1	A1	2	R	aDS	140	2023	1243	215
1.1	A1	2	R	aDS	141	2503	1248	210
1.1	A1	2	R	aDS	142	3245	1247	314
1.1	A1	2	R	aDS	143	1211	1255	224
1.1	A1	2	R	aDS	144	2786	1247	206
1.1	A1	2	R	aDS	145	3191	1249	207
1.1	A1	2	R	aDS	146	2393	1254	229
1.1	A1	2	R	aDS	147	1714	1260	329
1.1	A1	2	R	aDS	148	2693	1264	234
1.1	A1	2	R	aDS	149	2780	1273	236
1.1	A1	2	R	aDS	150	2877	1271	266
1.1	A1	2	R	aDS	151	2597	1279	567
1.1	A1	2	R	aDS	152	1394	1279	191
1.1	A1	2	R	aDS	153	3027	1280	185
1.1	A1	2	R	aDS	154	3157	1289	174
1.1	A1	2	R	aDS	155	2995	1287	203
1.1	A1	2	R	aDS	156	3278	1295	268
1.1	A1	2	R	aDS	157	2612	1296	187
1.1	A1	2	R	aDS	158	2727	1296	203
1.1	A1	2	R	aDS	159	2835	1302	296
1.1	A1	2	R	aDS	161	3323	1306	314
1.1	A1	2	R	aDS	162	2255	1312	459
1.1	A1	2	R	aDS	163	1065	1312	193
1.1	A1	2	R	aDS	164	3096	1313	260
1.1	A1	2	R	aDS	165	1375	1324	588
1.1	A1	2	R	aDS	166	2837	1321	221
1.1	A1	2	R	aDS	167	1152	1331	261
1.1	A1	2	R	aDS	168	1129	1330	258
1.1	A1	2	R	aDS	169	3142	1329	183
1.1	A1	2	R	aDS	170	2336	1331	196
1.1	A1	2	R	aDS	171	1807	1343	438
1.1	A1	2	R	aDS	172	2106	1344	870
1.1	A1	2	R	aDS	173	3384	1336	172
1.1	A1	2	R	aDS	174	2932	1337	221
1.1	A1	2	R	aDS	175	2894	1337	198
1.1	A1	2	R	aDS	176	1224	1341	186
1.1	A1	2	R	aDS	177	2860	1342	311
1.1	A1	2	R	aDS	178	3283	1348	562
1.1	A1	2	R	aDS	179	1853	1343	289
1.1	A1	2	R	aDS	180	1695	1355	944
1.1	A1	2	R	aDS	181	2075	1352	322
1.1	A1	2	R	aDS	183	2614	1358	260
1.1	A1	2	R	aDS	185	1654	1368	176
1.1	A1	2	R	aDS	186	2438	1365	209
1.1	A1	2	R	aDS	187	1914	1364	647
1.1	A1	2	R	aDS	188	1860	1367	354
1.1	A1	2	R	aDS	189	2191	1371	186
1.1	A1	2	R	aDS	190	2981	1388	269
1.1	A1	2	R	aDS	191	1709	1387	464
1.1	A1	2	R	aDS	192	2505	1389	414
1.1	A1	2	R	aDS	193	2126	1394	466
1.1	A1	2	R	aDS	194	2045	1400	560
1.1	A1	2	R	aDS	195	3167	1402	170
1.1	A1	2	R	aDS	196	1766	1404	374
1.1	A1	2	R	aDS	197	2079	1408	239
1.1	A1	2	R	aDS	198	2498	1410	240
1.1	A1	2	R	aDS	199	3218	1423	219
1.1	A1	2	R	aDS	200	3371	1426	503
1.1	A1	2	R	aDS	201	2131	1424	182
1.1	A1	2	R	aDS	202	2192	1432	289
1.1	A1	2	R	aDS	203	2517	1426	246
1.1	A1	2	R	aDS	204	2358	1433	188
1.1	A1	2	R	aDS	205	1719	1433	194
1.1	A1	2	R	aDS	206	1690	1436	216
1.1	A1	2	R	aDS	207	2459	1436	276
1.1	A1	2	R	aDS	208	3463	1443	287
1.1	A1	2	R	aDS	209	2292	1450	400
1.1	A1	2	R	aDS	210	2648	1454	354
1.1	A1	2	R	aDS	212	1713	1459	236
1.1	A1	2	R	aDS	213	1776	1469	520
1.1	A1	2	R	aDS	214	3297	1474	179
1.1	A1	2	R	aDS	215	2435	1491	510
1.1	A1	2	R	aDS	217	2801	1485	304
1.1	A1	2	R	aDS	219	2410	1495	236
1.1	A1	2	R	aDS	220	3230	1491	234
1.1	A1	2	R	aDS	221	2038	1499	316
1.1	A1	2	R	aDS	222	2463	1499	202
1.1	A1	2	R	aDS	223	1563	1500	198
1.1	A1	2	R	aDS	224	1877	1508	179
1.1	A1	2	R	aDS	225	1146	1512	210
1.1	A1	2	R	aDS	226	3223	1510	219
1.1	A1	2	R	aDS	227	1054	1512	182
1.1	A1	2	R	aDS	228	2034	1525	420
1.1	A1	2	R	aDS	229	2383	1523	284
1.1	A1	2	R	aDS	230	1077	1533	363
1.1	A1	2	R	aDS	231	3284	1531	241
1.1	A1	2	R	aDS	233	1719	1544	366
1.1	A1	2	R	aDS	234	2437	1552	375
1.1	A1	2	R	aDS	235	1075	1561	209
1.1	A1	2	R	aDS	236	3278	1561	305
1.1	A1	2	R	aDS	237	2042	1562	178
1.1	A1	2	R	aDS	238	3711	1565	289
1.1	A1	2	R	aDS	239	3451	1568	270
1.1	A1	2	R	aDS	241	1909	1582	342
1.1	A1	2	R	aDS	242	2450	1586	243
1.1	A1	2	R	aDS	243	3305	1595	209
1.1	A1	2	R	aDS	244	2357	1601	643
1.1	A1	2	R	aDS	245	3340	1601	330
1.1	A1	2	R	aDS	246	2131	1599	238
1.1	A1	2	R	aDS	247	1696	1600	170
1.1	A1	2	R	aDS	248	2895	1605	205
1.1	A1	2	R	aDS	250	1610	1607	250
1.1	A1	2	R	aDS	251	1637	1611	321
1.1	A1	2	R	aDS	252	1584	1623	366
1.1	A1	2	R	aDS	253	2496	1622	254
1.1	A1	2	R	aDS	254	1701	1624	187
1.1	A1	2	R	aDS	255	3328	1635	442
1.1	A1	2	R	aDS	256	3115	1631	190
1.1	A1	2	R	aDS	257	1469	1633	333
1.1	A1	2	R	aDS	258	3237	1633	276
1.1	A1	2	R	aDS	260	1873	1635	282
1.1	A1	2	R	aDS	261	2271	1635	248
1.1	A1	2	R	aDS	262	2475	1636	230
1.1	A1	2	R	aDS	263	1640	1646	270
1.1	A1	2	R	aDS	264	2501	1652	292
1.1	A1	2	R	aDS	265	2051	1671	1054
1.1	A1	2	R	aDS	266	1629	1666	323
1.1	A1	2	R	aDS	267	1169	1670	233
1.1	A1	2	R	aDS	268	1950	1669	272
1.1	A1	2	R	aDS	269	1597	1674	405
1.1	A1	2	R	aDS	270	1661	1681	576
1.1	A1	2	R	aDS	271	2912	1675	339
1.1	A1	2	R	aDS	272	2447	1683	212
1.1	A1	2	R	aDS	273	2427	1680	219
1.1	A1	2	R	aDS	274	1492	1678	184
1.1	A1	2	R	aDS	275	2651	1687	465
1.1	A1	2	R	aDS	276	2260	1685	221
1.1	A1	2	R	aDS	277	2682	1684	277
1.1	A1	2	R	aDS	278	2153	1681	299
1.1	A1	2	R	aDS	279	1729	1693	515
1.1	A1	2	R	aDS	280	2933	1689	193
1.1	A1	2	R	aDS	281	1796	1694	345
1.1	A1	2	R	aDS	282	1981	1693	211
1.1	A1	2	R	aDS	283	2864	1697	190
1.1	A1	2	R	aDS	284	2021	1698	495
1.1	A1	2	R	aDS	285	2709	1698	218
1.1	A1	2	R	aDS	286	1696	1698	243
1.1	A1	2	R	aDS	287	1479	1707	300
1.1	A1	2	R	aDS	288	3167	1710	359
1.1	A1	2	R	aDS	289	2539	1716	271
1.1	A1	2	R	aDS	290	1125	1727	319
1.1	A1	2	R	aDS	291	2451	1730	563
1.1	A1	2	R	aDS	292	1961	1727	189
1.1	A1	2	R	aDS	293	2020	1727	191
1.1	A1	2	R	aDS	294	2661	1732	243
1.1	A1	2	R	aDS	295	1867	1730	196
1.1	A1	2	R	aDS	296	1273	1734	203
1.1	A1	2	R	aDS	298	2682	1738	295
1.1	A1	2	R	aDS	299	2739	1740	318
1.1	A1	2	R	aDS	300	2158	1743	263
1.1	A1	2	R	aDS	301	1643	1745	241
1.1	A1	2	R	aDS	302	1968	1752	486
1.1	A1	2	R	aDS	303	1022	1749	176
1.1	A1	2	R	aDS	304	2341	1754	645
1.1	A1	2	R	aDS	305	3300	1753	301
1.1	A1	2	R	aDS	306	1673	1752	266
1.1	A1	2	R	aDS	307	2265	1752	218
1.1	A1	2	R	aDS	308	2191	1762	338
1.1	A1	2	R	aDS	309	2832	1761	188
1.1	A1	2	R	aDS	310	3152	1767	328
1.1	A1	2	R	aDS	311	3229	1768	175
1.1	A1	2	R	aDS	312	1660	1773	297
1.1	A1	2	R	aDS	313	2635	1785	503
1.1	A1	2	R	aDS	315	3218	1788	291
1.1	A1	2	R	aDS	316	3047	1788	171
1.1	A1	2	R	aDS	317	2793	1789	187
1.1	A1	2	R	aDS	318	2542	1798	251
1.1	A1	2	R	aDS	319	2738	1794	189
1.1	A1	2	R	aDS	320	2103	1808	261
1.1	A1	2	R	aDS	322	2453	1807	218
1.1	A1	2	R	aDS	323	2697	1805	258
1.1	A1	2	R	aDS	324	3181	1809	280
1.1	A1	2	R	aDS	325	1027	1810	301
1.1	A1	2	R	aDS	326	1581	1809	184
1.1	A1	2	R	aDS	327	2524	1816	392
1.1	A1	2	R	aDS	328	3390	1815	521
1.1	A1	2	R	aDS	329	1691	1813	213
1.1	A1	2	R	aDS	330	1425	1821	181
1.1	A1	2	R	aDS	331	1488	1823	183
1.1	A1	2	R	aDS	332	2872	1823	271
1.1	A1	2	R	aDS	333	3197	1831	441
1.1	A1	2	R	aDS	334	3559	1830	308
1.1	A1	2	R	aDS	335	1646	1835	271
1.1	A1	2	R	aDS	336	2467	1838	247
1.1	A1	2	R	aDS	337	1917	1841	258
1.1	A1	2	R	aDS	338	2660	1842	310
1.1	A1	2	R	aDS	339	1335	1840	217
1.1	A1	2	R	aDS	340	1589	1845	294
1.1	A1	2	R	aDS	341	1566	1843	234
1.1	A1	2	R	aDS	342	3516	1847	322
1.1	A1	2	R	aDS	343	1704	1852	364
1.1	A1	2	R	aDS	344	2336	1855	265
1.1	A1	2	R	aDS	345	3335	1862	743
1.1	A1	2	R	aDS	346	1679	1850	185
1.1	A1	2	R	aDS	347	1422	1865	326
1.1	A1	2	R	aDS	348	1815	1852	191
1.1	A1	2	R	aDS	349	2554	1855	254
1.1	A1	2	R	aDS	350	1301	1857	291
1.1	A1	2	R	aDS	351	2255	1870	564
1.1	A1	2	R	aDS	352	1792	1865	412
1.1	A1	2	R	aDS	353	3008	1868	277
1.1	A1	2	R	aDS	354	3127	1876	240
1.1	A1	2	R	aDS	355	2076	1870	215
1.1	A1	2	R	aDS	356	2502	1869	180
1.1	A1	2	R	aDS	357	2688	1872	300
1.1	A1	2	R	aDS	358	2198	1876	303
1.1	A1	2	R	aDS	359	2461	1870	264
1.1	A1	2	R	aDS	360	1689	1872	190
1.1	A1	2	R	aDS	361	1651	1876	278
1.1	A1	2	R	aDS	362	2791	1885	180
1.1	A1	2	R	aDS	363	2703	1887	226
1.1	A1	2	R	aDS	364	2283	1893	177
1.1	A1	2	R	aDS	365	1224	1893	246
1.1	A1	2	R	aDS	366	2178	1896	268
1.1	A1	2	R	aDS	367	2531	1905	474
1.1	A1	2	R	aDS	368	2357	1906	409
1.1	A1	2	R	aDS	369	1258	1906	179
1.1	A1	2	R	aDS	370	2954	1904	261
1.1	A1	2	R	aDS	371	2082	1908	173
1.1	A1	2	R	aDS	372	1937	1912	198
1.1	A1	2	R	aDS	374	1906	1916	306
1.1	A1	2	R	aDS	375	2460	1920	346
1.1	A1	2	R	aDS	376	3623	1919	202
1.1	A1	2	R	aDS	377	2739	1923	270
1.1	A1	2	R	aDS	378	1950	1927	209
1.1	A1	2	R	aDS	379	2790	1926	199
1.1	A1	2	R	aDS	380	1554	1939	226
1.1	A1	2	R	aDS	381	2831	1938	209
1.1	A1	2	R	aDS	383	1980	1940	272
1.1	A1	2	R	aDS	384	3076	1943	418
1.1	A1	2	R	aDS	385	3651	1940	212
1.1	A1	2	R	aDS	386	1071	1945	359
1.1	A1	2	R	aDS	387	1935	1949	233
1.1	A1	2	R	aDS	388	2121	1947	295
1.1	A1	2	R	aDS	389	1579	1950	313
1.1	A1	2	R	aDS	390	1835	1943	174
1.1	A1	2	R	aDS	391	1898	1944	234
1.1	A1	2	R	aDS	392	3261	1950	340
1.1	A1	2	R	aDS	393	2404	1955	338
1.1	A1	2	R	aDS	394	3312	1963	433
1.1	A1	2	R	aDS	395	3381	1955	300
1.1	A1	2	R	aDS	396	2063	1963	415
1.1	A1	2	R	aDS	397	2769	1959	207
1.1	A1	2	R	aDS	398	1603	1963	267
1.1	A1	2	R	aDS	399	2385	1965	282
1.1	A1	2	R	aDS	400	3232	1965	312
1.1	A1	2	R	aDS	401	2016	1963	257
1.1	A1	2	R	aDS	402	1165	1967	180
1.1	A1	2	R	aDS	403	3611	1967	245
1.1	A1	2	R	aDS	404	3155	1969	239
1.1	A1	2	R	aDS	405	3457	1974	231
1.1	A1	2	R	aDS	406	2099	1985	438
1.1	A1	2	R	aDS	407	2984	1983	240
1.1	A1	2	R	aDS	409	2728	1985	412
1.1	A1	2	R	aDS	410	1380	1988	280
1.1	A1	2	R	aDS	411	2219	1984	176
1.1	A1	2	R	aDS	412	3383	1985	208
1.1	A1	2	R	aDS	413	2029	1994	265
1.1	A1	2	R	aDS	414	2701	1994	281
1.1	A1	2	R	aDS	415	3032	1995	254
1.1	A1	2	R	aDS	416	1835	2005	450
1.1	A1	2	R	aDS	417	1967	2003	322
1.1	A1	2	R	aDS	419	1881	2002	294
1.1	A1	2	R	aDS	420	2368	2010	458
1.1	A1	2	R	aDS	421	2209	2016	320
1.1	A1	2	R	aDS	422	2761	2003	197
1.1	A1	2	R	aDS	423	3310	2004	174
1.1	A1	2	R	aDS	424	2598	2009	205
1.1	A1	2	R	aDS	425	2439	2009	290
1.1	A1	2	R	aDS	426	1759	2018	406
1.1	A1	2	R	aDS	427	2838	2028	394
1.1	A1	2	R	aDS	428	2005	2024	346
1.1	A1	2	R	aDS	429	1060	2034	335
1.1	A1	2	R	aDS	430	2175	2035	519
1.1	A1	2	R	aDS	431	2489	2039	674
1.1	A1	2	R	aDS	432	1800	2042	875
1.1	A1	2	R	aDS	434	2637	2061	810
1.1	A1	2	R	aDS	435	2072	2050	660
1.1	A1	2	R	aDS	436	2530	2053	367
1.1	A1	2	R	aDS	437	1733	2052	575
1.1	A1	2	R	aDS	438	2280	2053	262
1.1	A1	2	R	aDS	439	3452	2048	216
1.1	A1	2	R	aDS	440	3655	2057	310
1.1	A1	2	R	aDS	441	3017	2067	927
1.1	A1	2	R	aDS	442	1761	2058	213
1.1	A1	2	R	aDS	443	2003	2073	461
1.1	A1	2	R	aDS	445	3377	2067	256
1.1	A1	2	R	aDS	446	3218	2072	332
1.1	A1	2	R	aDS	447	2202	2082	245
1.1	A1	2	R	aDS	448	2335	2078	395
1.1	A1	2	R	aDS	449	2560	2077	306
1.1	A1	2	R	aDS	450	3064	2079	214
1.1	A1	2	R	aDS	452	3397	2081	306
1.1	A1	2	R	aDS	453	3198	2087	454
1.1	A1	2	R	aDS	454	2157	2086	233
1.1	A1	2	R	aDS	455	1780	2099	892
1.1	A1	2	R	aDS	458	1730	2107	715
1.1	A1	2	R	aDS	459	2483	2093	400
1.1	A1	2	R	aDS	460	2920	2090	245
1.1	A1	2	R	aDS	461	2124	2093	183
1.1	A1	2	R	aDS	462	2587	2095	362
1.1	A1	2	R	aDS	463	3417	2095	228
1.1	A1	2	R	aDS	465	2391	2096	511
1.1	A1	2	R	aDS	466	2520	2098	402
1.1	A1	2	R	aDS	467	3002	2099	314
1.1	A1	2	R	aDS	468	3034	2103	423
1.1	A1	2	R	aDS	469	1177	2116	576
1.1	A1	2	R	aDS	471	2447	2109	420
1.1	A1	2	R	aDS	472	3522	2106	251
1.1	A1	2	R	aDS	473	2305	2109	331
1.1	A1	2	R	aDS	474	2791	2111	203
1.1	A1	2	R	aDS	475	3265	2116	211
1.1	A1	2	R	aDS	476	2122	2118	533
1.1	A1	2	R	aDS	477	2177	2120	250
1.1	A1	2	R	aDS	479	2928	2117	228
1.1	A1	2	R	aDS	480	2355	2121	373
1.1	A1	2	R	aDS	481	2692	2132	428
1.1	A1	2	R	aDS	482	3359	2127	432
1.1	A1	2	R	aDS	483	1912	2130	332
1.1	A1	2	R	aDS	484	2499	2136	244
1.1	A1	2	R	aDS	485	3316	2141	240
1.1	A1	2	R	aDS	486	2554	2149	294
1.1	A1	2	R	aDS	487	2079	2147	279
1.1	A1	2	R	aDS	488	2099	2157	235
1.1	A1	2	R	aDS	489	1675	2163	316
1.1	A1	2	R	aDS	490	1925	2165	558
1.1	A1	2	R	aDS	491	3151	2156	296
1.1	A1	2	R	aDS	492	1982	2158	384
1.1	A1	2	R	aDS	493	2264	2162	231
1.1	A1	2	R	aDS	494	3477	2169	200
1.1	A1	2	R	aDS	495	1279	2178	310
1.1	A1	2	R	aDS	496	2119	2182	194
1.1	A1	2	R	aDS	497	2622	2181	303
1.1	A1	2	R	aDS	498	3003	2186	233
1.1	A1	2	R	aDS	500	3626	2190	336
1.1	A1	2	R	aDS	502	2866	2202	379
1.1	A1	2	R	aDS	503	2463	2203	238
1.1	A1	2	R	aDS	504	2654	2204	240
1.1	A1	2	R	aDS	505	2911	2206	326
1.1	A1	2	R	aDS	506	2320	2206	254
1.1	A1	2	R	aDS	507	1867	2213	349
1.1	A1	2	R	aDS	508	3261	2214	272
1.1	A1	2	R	aDS	509	2075	2233	675
1.1	A1	2	R	aDS	510	2011	2230	343
1.1	A1	2	R	aDS	511	2596	2225	181
1.1	A1	2	R	aDS	512	2399	2235	239
1.1	A1	2	R	aDS	513	3097	2230	228
1.1	A1	2	R	aDS	514	1809	2234	327
1.1	A1	2	R	aDS	515	3719	2240	172
1.1	A1	2	R	aDS	516	3061	2242	180
1.1	A1	2	R	aDS	517	3316	2248	244
1.1	A1	2	R	aDS	518	1118	2245	191
1.1	A1	2	R	aDS	519	2686	2248	208
1.1	A1	2	R	aDS	520	3216	2269	594
1.1	A1	2	R	aDS	521	3178	2268	526
1.1	A1	2	R	aDS	522	2031	2273	389
1.1	A1	2	R	aDS	523	2344	2267	218
1.1	A1	2	R	aDS	524	3033	2269	217
1.1	A1	2	R	aDS	525	3329	2278	383
1.1	A1	2	R	aDS	526	2594	2273	216
1.1	A1	2	R	aDS	527	2514	2281	419
1.1	A1	2	R	aDS	528	2145	2278	185
1.1	A1	2	R	aDS	529	2403	2283	321
1.1	A1	2	R	aDS	531	1666	2282	196
1.1	A1	2	R	aDS	532	2126	2288	392
1.1	A1	2	R	aDS	533	1837	2297	527
1.1	A1	2	R	aDS	534	2763	2284	223
1.1	A1	2	R	aDS	535	2925	2289	235
1.1	A1	2	R	aDS	537	3162	2298	924
1.1	A1	2	R	aDS	538	2431	2300	632
1.1	A1	2	R	aDS	540	2002	2299	387
1.1	A1	2	R	aDS	541	1242	2307	319
1.1	A1	2	R	aDS	542	2587	2316	539
1.1	A1	2	R	aDS	543	1671	2313	227
1.1	A1	2	R	aDS	544	2238	2311	188
1.1	A1	2	R	aDS	545	2347	2319	434
1.1	A1	2	R	aDS	546	3095	2311	331
1.1	A1	2	R	aDS	547	1928	2329	821
1.1	A1	2	R	aDS	548	2177	2326	579
1.1	A1	2	R	aDS	549	2560	2337	292
1.1	A1	2	R	aDS	550	2495	2341	242
1.1	A1	2	R	aDS	551	2265	2342	336
1.1	A1	2	R	aDS	552	1619	2346	327
1.1	A1	2	R	aDS	553	1688	2346	535
1.1	A1	2	R	aDS	554	3009	2345	288
1.1	A1	2	R	aDS	555	2163	2350	446
1.1	A1	2	R	aDS	557	2663	2358	235
1.1	A1	2	R	aDS	561	1828	2364	255
1.1	A1	2	R	aDS	562	2391	2377	610
1.1	A1	2	R	aDS	564	2615	2380	403
1.1	A1	2	R	aDS	565	1707	2388	862
1.1	A1	2	R	aDS	567	2672	2384	391
1.1	A1	2	R	aDS	568	2503	2388	352
1.1	A1	2	R	aDS	569	2338	2396	313
1.1	A1	2	R	aDS	570	2119	2394	235
1.1	A1	2	R	aDS	571	3300	2399	232
1.1	A1	2	R	aDS	572	2090	2399	191
1.1	A1	2	R	aDS	573	3169	2404	321
1.1	A1	2	R	aDS	574	2867	2402	264
1.1	A1	2	R	aDS	577	1631	2415	581
1.1	A1	2	R	aDS	578	1899	2410	254
1.1	A1	2	R	aDS	579	1831	2414	223
1.1	A1	2	R	aDS	580	2070	2424	469
1.1	A1	2	R	aDS	581	2692	2414	374
1.1	A1	2	R	aDS	583	1666	2421	200
1.1	A1	2	R	aDS	584	1421	2423	293
1.1	A1	2	R	aDS	585	2033	2419	177
1.1	A1	2	R	aDS	586	1987	2433	389
1.1	A1	2	R	aDS	587	2131	2425	202
1.1	A1	2	R	aDS	588	2287	2433	334
1.1	A1	2	R	aDS	591	1772	2432	412
1.1	A1	2	R	aDS	592	3319	2440	382
1.1	A1	2	R	aDS	594	1950	2440	290
1.1	A1	2	R	aDS	595	1627	2441	190
1.1	A1	2	R	aDS	596	1852	2443	353
1.1	A1	2	R	aDS	597	2967	2440	277
1.1	A1	2	R	aDS	598	3027	2447	300
1.1	A1	2	R	aDS	599	2383	2446	330
1.1	A1	2	R	aDS	600	1745	2449	363
1.1	A1	2	R	aDS	601	2046	2456	253
1.1	A1	2	R	aDS	603	1404	2457	229
1.1	A1	2	R	aDS	604	2610	2460	299
1.1	A1	2	R	aDS	606	1119	2461	187
1.1	A1	2	R	aDS	607	2236	2466	316
1.1	A1	2	R	aDS	608	1566	2468	190
1.1	A1	2	R	aDS	610	2674	2473	295
1.1	A1	2	R	aDS	611	2120	2471	262
1.1	A1	2	R	aDS	613	2450	2496	659
1.1	A1	2	R	aDS	614	2955	2481	598
1.1	A1	2	R	aDS	615	1657	2487	587
1.1	A1	2	R	aDS	616	2299	2492	523
1.1	A1	2	R	aDS	617	1789	2484	225
1.1	A1	2	R	aDS	619	1993	2488	319
1.1	A1	2	R	aDS	620	2097	2489	328
1.1	A1	2	R	aDS	622	3053	2491	253
1.1	A1	2	R	aDS	623	3108	2494	450
1.1	A1	2	R	aDS	624	1876	2490	186
1.1	A1	2	R	aDS	625	2126	2496	182
1.1	A1	2	R	aDS	626	2893	2500	362
1.1	A1	2	R	aDS	627	2171	2506	229
1.1	A1	2	R	aDS	628	2501	2509	249
1.1	A1	2	R	aDS	630	3223	2515	489
1.1	A1	2	R	aDS	631	1722	2516	226
1.1	A1	2	R	aDS	632	1534	2519	251
1.1	A1	2	R	aDS	633	2100	2517	201
1.1	A1	2	R	aDS	634	1773	2522	188
1.1	A1	2	R	aDS	635	1743	2527	420
1.1	A1	2	R	aDS	636	2742	2522	204
1.1	A1	2	R	aDS	637	3182	2525	368
1.1	A1	2	R	aDS	638	2335	2533	499
1.1	A1	2	R	aDS	639	2929	2535	344
1.1	A1	2	R	aDS	641	2826	2536	292
1.1	A1	2	R	aDS	642	1627	2540	223
1.1	A1	2	R	aDS	645	2713	2542	336
1.1	A1	2	R	aDS	648	1735	2547	198
1.1	A1	2	R	aDS	650	2921	2555	320
1.1	A1	2	R	aDS	651	1433	2556	180
1.1	A1	2	R	aDS	655	2943	2570	348
1.1	A1	2	R	aDS	656	3179	2569	286
1.1	A1	2	R	aDS	658	3354	2574	292
1.1	A1	2	R	aDS	660	2467	2573	285
1.1	A1	2	R	aDS	663	2983	2585	250
1.1	A1	2	R	aDS	664	2421	2582	280
1.1	A1	2	R	aDS	666	2904	2591	399
1.1	A1	2	R	aDS	667	2963	2582	248
1.1	A1	2	R	aDS	668	3079	2585	361
1.1	A1	2	R	aDS	669	2381	2594	264
1.1	A1	2	R	aDS	673	1534	2600	185
1.1	A1	2	R	aDS	674	2483	2610	212
1.1	A1	2	R	aDS	675	1554	2616	240
1.1	A1	2	R	aDS	683	3239	2630	316
1.1	A1	2	R	aDS	686	3297	2630	183
1.1	A1	2	R	aDS	691	3044	2634	175
1.1	A1	2	R	aDS	692	2607	2645	272
1.1	A1	2	R	aDS	694	2532	2648	191
1.1	A1	2	R	aDS	696	3154	2649	247
1.1	A1	2	R	aDS	706	3171	2667	247
1.1	A1	2	R	aDS	718	2879	2692	357
1.1	A1	2	R	aDS	721	3278	2695	197
1.1	A1	2	R	aDS	723	3071	2706	379
1.1	A1	2	R	aDS	724	2805	2708	316
1.1	A1	2	R	aDS	757	2929	2761	223
1.1	A1	2	R	aDS	760	3122	2774	299
1.1	A1	2	R	aDS	775	2729	2814	348
1.1	A1	2	R	aDS	781	2760	2816	196
1.1	A1	2	R	aDS	783	2973	2822	393
1.1	A1	2	R	aDS	784	3109	2824	258
1.1	A1	2	R	aDS	789	3365	2839	263
1.1	A1	2	R	aDS	819	3064	2904	294
1.1	A1	2	R	aDS	830	2838	2925	298
1.1	A1	2	R	aDS	835	3473	2932	274
1.1	A1	2	R	aDS	840	3177	2942	210
1.1	A1	2	R	aDS	852	3248	2979	334
1.1	A1	2	R	aDS	860	2937	2998	271
1.1	A1	2	R	aDS	862	3029	2999	301
1.1	A1	2	R	aDS	866	3170	3020	289
1.1	A1	2	R	aDS	883	2884	3066	225
1.1	A1	2	R	aDS	903	3336	3133	355
1.1	A1	2	R	aDS	916	2929	3197	397
1.1	A1	2	R	aDS	939	2929	3300	222
1.1	A1	2	R	aDS	965	2995	3399	304
1.1	A1	2	R	aDS	1181	1380	2237	300
1.1	A1	2	R	aDS	1182	1433	2218	143
1.1	A1	2	R	aDS	1183	1457	2216	415
1.1	A1	2	R	aDS	1184	1559	2179	220
1.1	A1	2	R	aDS	1185	1695	2275	269
1.1	A1	2	R	aDS	1186	1726	2316	375
1.1	A1	2	R	aDS	1187	1759	2376	562
1.1	A1	2	R	aDS	1188	1543	2000	289
1.1	A1	2	R	aDS	1189	1411	1922	295
1.1	A1	2	R	aDS	1190	1393	1853	234
1.1	A1	2	R	aDS	1191	1501	1852	347
1.1	A1	2	R	aDS	1192	1678	2003	310
1.1	A1	2	R	aDS	1193	1640	2081	287
1.1	A1	2	R	aDS	1194	1600	2106	268
1.1	A1	2	R	aDS	1195	1510	2033	402
1.1	A1	2	R	aDS	1196	1613	2249	363
1.1	A1	2	R	aDS	1197	1635	2222	365
1.1	A1	2	R	aDS	1198	1390	2486	297
1.1	A1	2	R	aDS	1199	1381	2554	278
1.1	A1	2	R	aDS	1200	1398	2524	296
1.1	A1	2	R	aDS	1201	1421	2530	207
1.1	A1	2	R	aDS	1202	1417	2586	209
1.1	A1	2	R	aDS	1204	1698	2222	297
1.1	A1	2	R	aDS	1205	1496	1423	378
1.1	A1	2	R	aDS	1206	1468	1418	424
1.1	A1	2	R	aDS	1207	1576	1365	293
1.1	A1	2	R	aDS	1208	1602	1369	201
1.1	A1	2	R	aDS	1209	1642	1307	434
1.1	A1	2	R	aDS	1210	1515	1093	317
1.1	A1	2	R	aDS	1211	1735	1043	285
1.1	A1	2	R	aDS	1212	1630	1198	504
1.1	A1	2	R	aDS	1213	1618	1157	309
1.1	A1	2	R	aDS	1214	1537	794	340
1.1	A1	2	R	aDS	1215	1569	1328	392
1.1	A1	2	R	aDS	1216	1503	2073	391
1.1	A1	2	R	aDS	1217	1563	2037	335
1.1	A1	2	R	aDS	1221	1378	2043	370
1.1	A1	2	R	aDS	1222	1641	1181	202
1.1	A1	2	R	aDS	1223	1674	1200	281
1.1	A1	2	R	aDS	1229	1940	2293	708
1.1	A1	2	R	aDS	1230	2127	2351	465
1.1	A1	2	R	aDS	1231	1956	2086	736
1.1	A1	2	R	aDS	1232	1536	2204	499
1.1	A1	2	R	aDS	1233	1565	2379	520
1.1	A1	2	R	aDS	1234	2015	1896	557
1.1	A1	2	R	aDS	1235	1952	1977	780
1.1	A1	2	R	aDS	1236	2157	1993	652
1.1	A1	2	R	aDS	1237	2018	1297	647
1.1	A1	2	R	aDS	1238	2126	1495	458
1.1	A1	2	R	aDS	1239	2002	556	408
1.1	A1	2	R	aDS	1240	2269	470	246
1.1	A1	2	R	aDS	1241	2231	415	394
1.1	A1	2	R	aDS	1242	2256	1462	423
1.1	A1	2	R	aDS	1243	2430	1402	354
1.1	A1	2	R	aDS	1244	2550	1252	433
1.1	A1	2	R	aDS	1245	2271	1274	373
1.1	A1	2	R	aDS	1246	2206	2185	390
1.1	A1	2	R	aDS	1247	2206	2140	434
1.1	A1	2	R	aDS	1248	2232	2167	329
1.1	A1	2	R	aDS	1249	2295	2189	462
1.1	A1	2	R	aDS	1250	2281	2271	389
1.1	A1	2	R	aDS	1251	2160	2212	404
1.1	A1	2	R	aDS	1252	2476	776	306
1.1	A1	2	R	aDS	1253	2571	748	258
1.1	A1	2	R	aDS	1254	2904	647	309
1.1	A1	2	R	aDS	1255	2933	615	243
1.1	A1	2	R	aDS	1256	2674	1359	596
1.1	A1	2	R	aDS	1257	2643	1398	290
1.1	A1	2	R	aDS	1258	3186	2148	462
1.1	A1	2	R	aDS	1265	2396	2349	344
1.1	A1	2	R	aDS	1266	2418	2332	274
1.1	A1	2	R	aDS	1267	3030	3128	393
1.1	A1	2	R	aDS	1269	3169	2454	492
1.1	A1	2	R	aDS	1270	3194	858	308
1.1	A1	2	R	aDS	1271	3143	1123	515
1.1	A1	2	R	aDS	1272	2940	2232	329
1.1	A1	2	R	aDS	1273	3097	2205	522
1.1	A1	2	R	aDS	1274	3153	1519	255
1.1	A1	2	R	aDS	1275	3151	1541	201
1.1	A1	2	R	aDS	1276	3186	1551	296
1.1	A1	2	R	aDS	1277	3121	1587	274
1.1	A1	2	R	aDS	1278	3376	1250	303
1.1	A1	2	R	aDS	1279	3313	1253	228
1.1	A1	2	R	aDS	1280	3281	1241	412
1.1	A1	2	R	aDS	1281	3383	1223	459
1.1	A1	2	R	aDS	1282	2945	1075	344
1.1	A1	2	R	aDS	1283	3018	1045	312
1.1	A1	2	R	aDS	1284	3109	970	422
1.1	A1	2	R	aDS	1285	3326	1528	257
1.1	A1	2	R	aDS	1286	3663	1291	319
1.1	A2	2	L	aDS	1	1755	521	195
1.1	A2	2	L	aDS	2	1865	537	240
1.1	A2	2	L	aDS	4	1567	630	328
1.1	A2	2	L	aDS	5	2047	667	243
1.1	A2	2	L	aDS	6	1999	681	184
1.1	A2	2	L	aDS	8	1737	725	190
1.1	A2	2	L	aDS	10	1789	765	174
1.1	A2	2	L	aDS	12	1660	855	339
1.1	A2	2	L	aDS	14	1494	868	330
1.1	A2	2	L	aDS	15	1784	885	183
1.1	A2	2	L	aDS	16	1980	894	178
1.1	A2	2	L	aDS	17	2173	907	313
1.1	A2	2	L	aDS	18	1743	907	225
1.1	A2	2	L	aDS	20	823	922	175
1.1	A2	2	L	aDS	22	1605	998	194
1.1	A2	2	L	aDS	23	1738	1016	377
1.1	A2	2	L	aDS	24	1515	1024	312
1.1	A2	2	L	aDS	25	1695	1042	315
1.1	A2	2	L	aDS	26	1506	1044	192
1.1	A2	2	L	aDS	27	2042	1064	201
1.1	A2	2	L	aDS	28	1597	1123	429
1.1	A2	2	L	aDS	29	1779	1144	230
1.1	A2	2	L	aDS	30	1325	1155	372
1.1	A2	2	L	aDS	31	1556	1152	228
1.1	A2	2	L	aDS	32	1203	1172	283
1.1	A2	2	L	aDS	33	2135	1178	248
1.1	A2	2	L	aDS	34	1277	1202	183
1.1	A2	2	L	aDS	36	1513	1216	239
1.1	A2	2	L	aDS	38	1948	1224	248
1.1	A2	2	L	aDS	39	1976	1238	639
1.1	A2	2	L	aDS	40	1579	1230	182
1.1	A2	2	L	aDS	42	853	1236	237
1.1	A2	2	L	aDS	43	1467	1246	224
1.1	A2	2	L	aDS	45	1244	1251	246
1.1	A2	2	L	aDS	46	1445	1255	203
1.1	A2	2	L	aDS	48	1504	1270	262
1.1	A2	2	L	aDS	49	1247	1274	322
1.1	A2	2	L	aDS	51	901	1286	249
1.1	A2	2	L	aDS	54	1295	1296	179
1.1	A2	2	L	aDS	55	1250	1305	247
1.1	A2	2	L	aDS	56	2070	1307	317
1.1	A2	2	L	aDS	57	765	1322	207
1.1	A2	2	L	aDS	58	1925	1330	357
1.1	A2	2	L	aDS	59	1407	1333	173
1.1	A2	2	L	aDS	60	515	1336	260
1.1	A2	2	L	aDS	62	1266	1348	387
1.1	A2	2	L	aDS	63	798	1346	188
1.1	A2	2	L	aDS	64	1949	1354	420
1.1	A2	2	L	aDS	69	671	1389	189
1.1	A2	2	L	aDS	71	475	1396	209
1.1	A2	2	L	aDS	72	1930	1417	385
1.1	A2	2	L	aDS	73	1779	1416	229
1.1	A2	2	L	aDS	74	1774	1430	176
1.1	A2	2	L	aDS	75	1553	1437	191
1.1	A2	2	L	aDS	76	2360	1436	218
1.1	A2	2	L	aDS	78	1914	1449	172
1.1	A2	2	L	aDS	79	1640	1457	417
1.1	A2	2	L	aDS	80	657	1451	189
1.1	A2	2	L	aDS	81	2029	1474	248
1.1	A2	2	L	aDS	85	1677	1512	257
1.1	A2	2	L	aDS	90	1960	1545	217
1.1	A2	2	L	aDS	92	1294	1569	220
1.1	A2	2	L	aDS	95	1827	1580	210
1.1	A2	2	L	aDS	96	1502	1586	284
1.1	A2	2	L	aDS	98	1753	1599	243
1.1	A2	2	L	aDS	101	2161	1635	185
1.1	A2	2	L	aDS	103	2158	1661	305
1.1	A2	2	L	aDS	105	2031	1701	484
1.1	A2	2	L	aDS	106	2226	1695	186
1.1	A2	2	L	aDS	107	2051	1699	186
1.1	A2	2	L	aDS	109	1473	1728	241
1.1	A2	2	L	aDS	110	1521	1744	238
1.1	A2	2	L	aDS	111	1579	1745	290
1.1	A2	2	L	aDS	112	2105	1750	330
1.1	A2	2	L	aDS	113	2124	1751	191
1.1	A2	2	L	aDS	115	672	1770	199
1.1	A2	2	L	aDS	117	2049	1791	203
1.1	A2	2	L	aDS	118	1628	1835	204
1.1	A2	2	L	aDS	119	2380	1843	285
1.1	A2	2	L	aDS	121	2425	1855	200
1.1	A2	2	L	aDS	124	2082	1868	180
1.1	A2	2	L	aDS	126	688	1874	194
1.1	A2	2	L	aDS	127	2267	1917	285
1.1	A2	2	L	aDS	128	2458	1916	229
1.1	A2	2	L	aDS	129	1764	1927	171
1.1	A2	2	L	aDS	130	1824	1930	322
1.1	A2	2	L	aDS	132	1987	1929	174
1.1	A2	2	L	aDS	133	1882	1949	205
1.1	A2	2	L	aDS	134	1840	1952	245
1.1	A2	2	L	aDS	135	1757	1971	193
1.1	A2	2	L	aDS	136	1354	1988	217
1.1	A2	2	L	aDS	137	1755	1991	171
1.1	A2	2	L	aDS	141	1897	2072	176
1.1	A2	2	L	aDS	142	2194	2076	199
1.1	A2	2	L	aDS	143	2255	2079	201
1.1	A2	2	L	aDS	145	1337	2111	370
1.1	A2	2	L	aDS	146	2228	2122	246
1.1	A2	2	L	aDS	150	1231	2191	234
1.1	A2	2	L	aDS	152	2117	2259	241
1.1	A2	2	L	aDS	153	1970	2263	190
1.1	A2	2	L	aDS	154	2032	2273	288
1.1	A2	2	L	aDS	155	1797	2279	192
1.1	A2	2	L	aDS	157	2205	2312	319
1.1	A2	2	L	aDS	159	2022	2317	367
1.1	A2	2	L	aDS	161	1724	2324	206
1.1	A2	2	L	aDS	163	652	2334	208
1.1	A2	2	L	aDS	165	1679	2340	432
1.1	A2	2	L	aDS	166	1729	2358	409
1.1	A2	2	L	aDS	168	1837	2358	198
1.1	A2	2	L	aDS	174	1869	2422	179
1.1	A2	2	L	aDS	176	1689	2428	227
1.1	A2	2	L	aDS	177	1871	2445	550
1.1	A2	2	L	aDS	185	1600	2485	215
1.1	A2	2	L	aDS	186	1249	2506	276
1.1	A2	2	L	aDS	204	1758	2628	175
1.1	A2	2	L	aDS	205	1534	2631	197
1.1	A2	2	L	aDS	211	1715	2681	172
1.1	A2	2	L	aDS	212	1491	2682	173
1.1	A2	2	L	aDS	233	1142	2760	184
1.1	A2	2	L	aDS	249	1264	2884	197
1.1	A2	2	L	aDS	251	1250	2920	203
1.1	A2	2	L	aDS	265	1331	2980	235
1.1	A2	2	L	aDS	269	1370	2991	309
1.1	A2	2	L	aDS	271	1466	3001	184
1.1	A2	2	L	aDS	583	2587	2116	239
1.1	A2	2	L	aDS	584	2397	2066	161
1.1	A2	2	L	aDS	588	1800	1416	161
1.1	A2	2	L	aDS	589	2176	1141	287
1.1	A2	2	R	aDS	1	1445	148	205
1.1	A2	2	R	aDS	2	1610	181	256
1.1	A2	2	R	aDS	3	1667	254	188
1.1	A2	2	R	aDS	4	1147	289	282
1.1	A2	2	R	aDS	5	1095	287	193
1.1	A2	2	R	aDS	6	1037	285	182
1.1	A2	2	R	aDS	7	2148	300	172
1.1	A2	2	R	aDS	8	1872	337	188
1.1	A2	2	R	aDS	9	2364	348	259
1.1	A2	2	R	aDS	10	1969	348	231
1.1	A2	2	R	aDS	11	927	353	251
1.1	A2	2	R	aDS	12	931	378	176
1.1	A2	2	R	aDS	13	2122	383	201
1.1	A2	2	R	aDS	14	1176	396	294
1.1	A2	2	R	aDS	15	2332	406	318
1.1	A2	2	R	aDS	16	1008	414	414
1.1	A2	2	R	aDS	17	1168	419	311
1.1	A2	2	R	aDS	18	2381	429	190
1.1	A2	2	R	aDS	19	2295	446	226
1.1	A2	2	R	aDS	20	2068	473	319
1.1	A2	2	R	aDS	21	2096	492	357
1.1	A2	2	R	aDS	22	822	495	327
1.1	A2	2	R	aDS	23	1904	492	172
1.1	A2	2	R	aDS	24	2148	495	252
1.1	A2	2	R	aDS	25	897	497	192
1.1	A2	2	R	aDS	26	1121	504	245
1.1	A2	2	R	aDS	27	2523	524	232
1.1	A2	2	R	aDS	28	1220	530	245
1.1	A2	2	R	aDS	29	1006	530	284
1.1	A2	2	R	aDS	30	1241	530	172
1.1	A2	2	R	aDS	31	1850	542	170
1.1	A2	2	R	aDS	32	2037	546	181
1.1	A2	2	R	aDS	33	1919	552	177
1.1	A2	2	R	aDS	34	1001	558	192
1.1	A2	2	R	aDS	35	2202	559	228
1.1	A2	2	R	aDS	36	961	569	242
1.1	A2	2	R	aDS	37	898	584	334
1.1	A2	2	R	aDS	38	1041	575	231
1.1	A2	2	R	aDS	39	2484	579	208
1.1	A2	2	R	aDS	40	2198	590	207
1.1	A2	2	R	aDS	41	2269	599	351
1.1	A2	2	R	aDS	42	2303	606	429
1.1	A2	2	R	aDS	43	2701	606	209
1.1	A2	2	R	aDS	44	1852	612	220
1.1	A2	2	R	aDS	46	701	622	457
1.1	A2	2	R	aDS	47	1015	627	360
1.1	A2	2	R	aDS	48	1293	621	256
1.1	A2	2	R	aDS	49	2284	624	330
1.1	A2	2	R	aDS	50	1412	643	254
1.1	A2	2	R	aDS	51	2178	643	313
1.1	A2	2	R	aDS	52	1036	646	209
1.1	A2	2	R	aDS	53	1864	647	174
1.1	A2	2	R	aDS	54	1247	648	232
1.1	A2	2	R	aDS	55	2532	662	220
1.1	A2	2	R	aDS	56	1927	678	224
1.1	A2	2	R	aDS	57	2147	686	278
1.1	A2	2	R	aDS	58	2069	688	261
1.1	A2	2	R	aDS	59	1123	692	245
1.1	A2	2	R	aDS	60	1239	701	275
1.1	A2	2	R	aDS	61	1010	703	390
1.1	A2	2	R	aDS	62	2342	703	239
1.1	A2	2	R	aDS	63	2533	715	309
1.1	A2	2	R	aDS	64	1365	725	419
1.1	A2	2	R	aDS	65	1234	748	323
1.1	A2	2	R	aDS	66	975	758	250
1.1	A2	2	R	aDS	67	770	772	332
1.1	A2	2	R	aDS	68	2435	764	199
1.1	A2	2	R	aDS	69	2404	765	251
1.1	A2	2	R	aDS	70	2601	776	216
1.1	A2	2	R	aDS	71	754	789	256
1.1	A2	2	R	aDS	72	2379	793	222
1.1	A2	2	R	aDS	73	1310	800	328
1.1	A2	2	R	aDS	74	1262	800	234
1.1	A2	2	R	aDS	75	1592	799	259
1.1	A2	2	R	aDS	76	881	814	233
1.1	A2	2	R	aDS	77	995	823	674
1.1	A2	2	R	aDS	78	1852	827	200
1.1	A2	2	R	aDS	80	913	849	459
1.1	A2	2	R	aDS	81	2350	871	207
1.1	A2	2	R	aDS	83	1225	879	341
1.1	A2	2	R	aDS	84	934	890	463
1.1	A2	2	R	aDS	85	1738	884	280
1.1	A2	2	R	aDS	86	2935	886	256
1.1	A2	2	R	aDS	87	2237	894	229
1.1	A2	2	R	aDS	88	1792	897	379
1.1	A2	2	R	aDS	89	1654	904	304
1.1	A2	2	R	aDS	90	1924	924	201
1.1	A2	2	R	aDS	91	1792	925	179
1.1	A2	2	R	aDS	92	1406	935	222
1.1	A2	2	R	aDS	93	1188	938	347
1.1	A2	2	R	aDS	94	2955	948	235
1.1	A2	2	R	aDS	95	1853	950	245
1.1	A2	2	R	aDS	96	1199	963	257
1.1	A2	2	R	aDS	97	2907	966	377
1.1	A2	2	R	aDS	98	1975	982	439
1.1	A2	2	R	aDS	99	2438	988	244
1.1	A2	2	R	aDS	100	2157	994	235
1.1	A2	2	R	aDS	101	1891	995	195
1.1	A2	2	R	aDS	102	1632	1000	186
1.1	A2	2	R	aDS	103	1995	1001	221
1.1	A2	2	R	aDS	104	1810	1004	176
1.1	A2	2	R	aDS	105	1018	1007	284
1.1	A2	2	R	aDS	106	1787	1004	199
1.1	A2	2	R	aDS	107	2042	1005	197
1.1	A2	2	R	aDS	108	1130	1006	170
1.1	A2	2	R	aDS	109	2078	1022	235
1.1	A2	2	R	aDS	110	2289	1020	204
1.1	A2	2	R	aDS	111	1806	1022	175
1.1	A2	2	R	aDS	112	2993	1031	196
1.1	A2	2	R	aDS	113	1646	1034	207
1.1	A2	2	R	aDS	115	1312	1051	571
1.1	A2	2	R	aDS	116	1557	1053	173
1.1	A2	2	R	aDS	117	2109	1064	386
1.1	A2	2	R	aDS	118	1791	1071	216
1.1	A2	2	R	aDS	119	2585	1074	185
1.1	A2	2	R	aDS	120	1764	1077	184
1.1	A2	2	R	aDS	121	1851	1085	543
1.1	A2	2	R	aDS	122	2473	1077	186
1.1	A2	2	R	aDS	123	2133	1077	178
1.1	A2	2	R	aDS	124	2237	1102	330
1.1	A2	2	R	aDS	125	1471	1117	306
1.1	A2	2	R	aDS	126	2324	1145	175
1.1	A2	2	R	aDS	127	2375	1155	289
1.1	A2	2	R	aDS	128	2399	1166	212
1.1	A2	2	R	aDS	129	1125	1179	244
1.1	A2	2	R	aDS	130	2233	1194	303
1.1	A2	2	R	aDS	131	2080	1189	191
1.1	A2	2	R	aDS	132	1085	1216	234
1.1	A2	2	R	aDS	133	2524	1223	323
1.1	A2	2	R	aDS	134	2193	1217	179
1.1	A2	2	R	aDS	135	2415	1234	236
1.1	A2	2	R	aDS	136	2497	1240	229
1.1	A2	2	R	aDS	137	1688	1268	273
1.1	A2	2	R	aDS	138	1719	1268	266
1.1	A2	2	R	aDS	139	2221	1269	403
1.1	A2	2	R	aDS	140	3109	1292	392
1.1	A2	2	R	aDS	141	2548	1295	213
1.1	A2	2	R	aDS	142	2599	1307	238
1.1	A2	2	R	aDS	143	2756	1319	194
1.1	A2	2	R	aDS	144	3058	1320	201
1.1	A2	2	R	aDS	145	3038	1330	181
1.1	A2	2	R	aDS	146	2986	1334	305
1.1	A2	2	R	aDS	147	2586	1336	566
1.1	A2	2	R	aDS	148	1878	1346	283
1.1	A2	2	R	aDS	149	2091	1382	390
1.1	A2	2	R	aDS	150	1632	1382	173
1.1	A2	2	R	aDS	152	2406	1404	224
1.1	A2	2	R	aDS	153	1926	1418	409
1.1	A2	2	R	aDS	154	1844	1427	287
1.1	A2	2	R	aDS	155	2956	1428	224
1.1	A2	2	R	aDS	156	2482	1459	274
1.1	A2	2	R	aDS	157	2438	1472	187
1.1	A2	2	R	aDS	158	1661	1476	181
1.1	A2	2	R	aDS	159	2252	1478	181
1.1	A2	2	R	aDS	160	1872	1486	193
1.1	A2	2	R	aDS	161	2208	1493	180
1.1	A2	2	R	aDS	162	1744	1504	388
1.1	A2	2	R	aDS	163	1768	1504	208
1.1	A2	2	R	aDS	164	2121	1537	176
1.1	A2	2	R	aDS	165	2645	1542	214
1.1	A2	2	R	aDS	166	1257	1547	186
1.1	A2	2	R	aDS	167	1552	1552	181
1.1	A2	2	R	aDS	168	1105	1560	205
1.1	A2	2	R	aDS	169	1589	1575	256
1.1	A2	2	R	aDS	170	2577	1575	195
1.1	A2	2	R	aDS	171	2674	1579	396
1.1	A2	2	R	aDS	172	1123	1578	181
1.1	A2	2	R	aDS	173	2173	1581	210
1.1	A2	2	R	aDS	174	1619	1581	190
1.1	A2	2	R	aDS	175	1441	1606	180
1.1	A2	2	R	aDS	176	2185	1620	251
1.1	A2	2	R	aDS	178	2404	1624	244
1.1	A2	2	R	aDS	179	1612	1630	689
1.1	A2	2	R	aDS	180	1803	1630	257
1.1	A2	2	R	aDS	181	2627	1632	266
1.1	A2	2	R	aDS	182	2210	1652	308
1.1	A2	2	R	aDS	183	1385	1652	174
1.1	A2	2	R	aDS	184	2066	1659	222
[truncated: 61,119 more rows]
