# Supplementary material for: A corticostriatal deficit promotes temporal distortion of automatic action in ageing
Source: eLife journal article supplement (doi:10.7554/elife.29908), 2017-10-23
Supplement: supp [file elife-29908-supp-v1.zip › elife_poa_e29908_Figure_5_source_data_1.xlsx]

## Sheet: Sheet1
\Experiment code: JBG024
\Experiment summary: 7 dSPN-hM4Di(-) (WTp221, 222, 204, 223, 205, 207, 226) and 7 dSPN-hMDi(+) (Cre224, 206, 208, 209, 211, 225, 227) littermate mice (C57Bl6) were allowed to recover from surgery (3 weeks) prior to being exposed to instrumental training (increasing random ratio schedule of reinfocement). CRF days 1-3): constant reinforcement; RR5 (days 4-7): random ratio 5; RR10 (days 8-9): rando…
\Data type and description: event-time stamp data. The time at which each event occurred (Y matrix, values 1-4) was stamped with a 10 ms resolution (Z matrix, centiseconds). Y matrix: 1=active response; 2=inactive response; 3=delivered pellet; 4=Magazine entry (time-controlled; consecutive entries within 200ms are not repeatedly stamped). Data were obtained through MED STATE NOTATION (MED Associa…
\Authors: J Bertran-Gonzalez (ORCID: 0000-0002-3794-1782), Miriam Matamales (ORCID: 0000-0001-9978-0091)
DAY 1																																	DAY 2
Subject	WTp221	WTp222	WTp204	WTp223	WTp205	Cre224	Cre206	Cre208	WTp207	WTp226	Cre209	Cre211	Cre225	Cre227		Subject	WTp221	WTp222	WTp204	WTp223	WTp205	Cre224	Cre206	Cre208	WTp207	WTp226	Cre209	Cre211	Cre225	Cre227			Subject	WTp221	WTp222	WTp204	WTp223	WTp205	Cre224	Cre206	Cre208	WTp207	Cre209	WTp226	Cre211	Cre225	Cre227		Subject
Start Date	2016-05-27	2016-05-27	2016-05-27	2016-05-27	2016-05-27	2016-05-27	2016-05-27	2016-05-27	2016-05-28	2016-05-27	2016-05-27	2016-05-27	2016-05-27	2016-05-27		Start Date	2016-05-27	2016-05-27	2016-05-27	2016-05-27	2016-05-27	2016-05-27	2016-05-27	2016-05-27	2016-05-28	2016-05-27	2016-05-27	2016-05-27	2016-05-27	2016-05-27			Start Date	2016-05-28	2016-05-28	2016-05-28	2016-05-28	2016-05-28	2016-05-28	2016-05-28	2016-05-28	2016-05-30	2016-05-28	2016-05-28	2016-05-28	2016-05-28	2016-05-28		Start Date
Start Time	09:57:46	10:58:30	13:07:44	09:57:46	12:37:26	09:57:46	12:37:26	15:15:27	10:43:46	13:07:44	15:15:27	11:33:54	15:06:18	13:07:44		Start Time	09:57:46	10:58:30	13:07:44	09:57:46	12:37:26	09:57:46	12:37:26	15:15:27	10:43:46	13:07:44	15:15:27	11:33:54	15:06:18	13:07:44			Start Time	09:05:28	09:05:28	11:18:53	09:05:28	10:14:40	09:36:18	10:43:46	10:10:34	12:47:23	09:05:28	10:14:40	09:05:28	11:47:17	10:14:40		Start Time
Experiment	JBG024	JBG024	JBG024	JBG024	JBG024	JBG024	JBG024	JBG024	JBG024	JBG024	JBG024	JBG024	JBG024	JBG024		Experiment	JBG024	JBG024	JBG024	JBG024	JBG024	JBG024	JBG024	JBG024	JBG024	JBG024	JBG024	JBG024	JBG024	JBG024			Experiment	JBG024	JBG024	JBG024	JBG024	JBG024	JBG024	JBG024	JBG024	JBG024	JBG024	JBG024	JBG024	JBG024	JBG024		Experiment
Box	1	2	2	3	3	4	4	5	5	6	6	7	7	8		Box	1	2	2	3	3	4	4	5	5	6	6	7	7	8			Box	1	2	2	3	3	4	4	5	5	6	6	7	7	8		Box
Total Active Reponses (1)	20	20	3	20	15	20	3	4	3	20	20	20	4	20		Total Active Reponses (1)	20	20	3	20	15	20	3	4	3	20	20	20	4	20			Total Active Reponses (1)	20	20	16	20	19	7	6	4	12	20	20	20	7	20		Total Active Reponses (1)
Total Inactive Reponses (2)	0	0	0	0	0	0	0	0	0	0	0	0	0	0		Total Inactive Reponses (2)	0	0	0	0	0	0	0	0	0	0	0	0	0	0			Total Inactive Reponses (2)	0	0	0	0	0	0	0	0	0	0	0	0	0	0		Total Inactive Reponses (2)
Magazine Entries (4)	31	42	20	57	66	40	67	110	62	46	45	70	74	59		Magazine Entries (4)	31	42	20	57	66	40	67	110	62	46	45	70	74	59			Magazine Entries (4)	29	43	79	57	55	84	91	22	64	44	35	114	86	43		Magazine Entries (4)
Delivered Pellets (3)	20	20	3	20	15	20	3	4	3	20	20	20	4	20		Delivered Pellets (3)	20	20	3	20	15	20	3	4	3	20	20	20	4	20			Delivered Pellets (3)	20	20	16	20	19	7	6	4	12	20	20	20	7	20		Delivered Pellets (3)
Raw Mag Entries	38	49	32	68	80	48	73	125	75	53	54	86	91	73		Raw Mag Entries	38	49	32	68	80	48	73	125	75	53	54	86	91	73			Raw Mag Entries	36	50	103	72	70	96	111	26	84	54	46	139	102	49		Raw Mag Entries
Time (centiseconds)	101380	29911	180001	129237	180001	65800	180001	180001	180001	49122	108285	61651	180001	46493		Time (centiseconds)	101380	29911	180001	129237	180001	65800	180001	180001	180001	49122	108285	61651	180001	46493			Time (centiseconds)	42364	58847	180001	57508	180001	180001	180001	180001	180001	54337	53670	117851	180001	49346		Time (centiseconds)
# of Stamped Events	71	82	26	97	96	80	73	118	68	86	85	110	82	99		# of Stamped Events	71	82	26	97	96	80	73	118	68	86	85	110	82	99			# of Stamped Events	69	83	111	97	93	98	103	30	88	84	75	154	100	83		# of Stamped Events
Y(1)	1	4	1	4	4	1	4	4	4	4	4	4	4	4		Z(1)	8.55	7.39	82.28	50.79	25.59	262.92	34.59	45.79	109.79	6.59	187.79	4.99	44.79	12.19			Y(1)	4	4	4	4	4	4	4	4	1	1	1	4	4	1		Z(1)
Y(2)	3	1	3	4	4	3	4	4	4	1	4	4	4	4		Z(2)	8.66	8.57	82.39	121.19	43.99	263.03	188.19	53.59	170.59	9.7	336.99	11.39	45.39	35.59			Y(2)	4	4	4	4	4	1	4	4	3	3	3	4	4	3		Z(2)
Y(3)	4	3	4	4	4	4	4	4	4	3	4	4	4	4		Z(3)	10.19	8.68	83.59	123.59	71.79	273.99	378.39	172.59	170.99	9.81	342.59	13.19	46.19	49.19			Y(3)	4	1	4	4	1	3	4	4	1	4	4	4	4	4		Z(3)
Y(4)	1	4	4	4	4	4	4	4	4	4	4	4	4	4		Z(4)	32.23	11.39	96.99	161.79	103.19	281.79	394.99	203.19	196.99	11.79	630.39	17.19	63.59	51.99			Y(4)	4	3	4	4	3	4	4	4	3	4	1	4	4	4		Z(4)
Y(5)	3	4	4	4	4	1	4	4	4	4	4	1	4	4		Z(5)	32.34	24.19	97.79	252.19	104.59	285.82	402.59	246.99	271.99	27.59	651.79	29.46	67.19	53.19			Y(5)	1	4	4	4	4	4	4	1	4	4	3	4	4	1		Z(5)
Y(6)	4	1	4	4	4	3	4	4	4	1	1	3	4	4		Z(6)	34.99	39.42	170.19	262.39	105.19	285.93	452.59	253.99	280.99	29.01	699.07	29.57	72.39	92.79			Y(6)	3	4	1	1	4	4	4	3	4	4	4	4	4	3		Z(6)
Y(7)	1	3	4	1	4	1	4	4	4	3	3	4	1	4		Z(7)	66.42	39.53	171.19	271.57	111.39	287.87	593.39	281.79	287.99	29.12	699.18	31.19	130.59	124.99			Y(7)	4	1	3	3	4	1	4	4	4	4	4	1	4	4		Z(7)
Y(8)	3	4	4	3	4	3	4	4	4	1	4	4	3	4		Z(8)	66.53	40.79	239.59	271.68	141.79	287.98	594.39	321.79	318.19	29.97	704.59	47.99	130.7	134.79			Y(8)	1	3	4	4	1	3	4	4	1	1	1	3	4	4		Z(8)
Y(9)	1	4	4	4	1	4	4	4	4	3	4	4	4	4		Z(9)	69.7	50.59	240.19	278.59	149.59	290.19	594.79	325.19	318.79	30.08	713.19	49.79	135.19	142.19			Y(9)	3	4	4	4	3	4	1	4	3	3	3	4	4	1		Z(9)
Y(10)	3	4	1	4	3	4	4	1	4	4	4	1	4	4		Z(10)	69.81	53.39	270.74	298.59	149.7	297.39	598.99	360.13	372.19	31.39	714.19	89.39	141.59	143.19			Y(10)	4	4	4	4	4	4	3	1	4	4	4	4	4	3		Z(10)
Y(11)	4	1	3	4	4	4	4	3	4	4	1	3	4	4		Z(11)	71.19	61.32	270.85	321.99	157.59	306.19	599.59	360.24	400.79	37.39	725.88	89.5	141.99	143.79			Y(11)	4	4	4	4	4	4	4	3	4	4	1	1	1	4		Z(11)
Y(12)	4	3	4	4	4	4	4	4	4	4	3	4	4	4		Z(12)	80.19	61.43	273.19	362.99	172.99	307.39	654.99	367.39	513.79	70.79	725.99	91.19	188.99	144.79			Y(12)	1	4	4	1	4	4	4	4	1	1	3	3	3	4		Z(12)
Y(13)	1	4	4	1	4	1	4	4	4	1	4	1	4	1		Z(13)	87.05	62.79	286.99	414.28	187.79	312.64	736.39	369.19	526.59	81.65	726.99	114.09	227.19	166.47			Y(13)	3	1	4	3	4	4	4	4	3	3	4	4	4	4		Z(13)
Y(14)	3	4	4	3	4	3	4	4	4	3	4	3	4	3		Z(14)	87.16	74.79	503.79	414.39	200.79	312.75	889.99	385.19	527.19	81.76	734.59	114.2	245.79	166.58			Y(14)	4	3	1	4	1	4	1	1	4	4	4	4	4	1		Z(14)
Y(15)	1	1	4	4	4	4	4	4	4	4	1	4	4	4		Z(15)	87.96	77.21	504.19	416.59	201.39	314.79	908.79	415.59	527.79	82.99	754.85	115.39	277.19	168.19			Y(15)	1	4	3	1	3	4	3	3	4	4	1	4	4	3		Z(15)
Y(16)	3	3	4	4	4	4	4	4	4	1	3	1	4	4		Z(16)	88.07	77.32	514.19	445.39	221.59	322.19	917.39	432.19	553.99	92.68	754.96	143.78	280.19	175.99			Y(16)	3	4	1	3	4	4	4	4	4	4	3	4	4	4		Z(16)
Y(17)	4	4	1	4	4	1	4	4	4	3	4	3	4	4		Z(17)	89.39	78.39	663.71	448.39	230.79	332.21	931.99	450.59	554.99	92.79	756.19	143.89	291.19	177.39			Y(17)	4	4	3	4	4	4	4	4	4	1	4	1	4	4		Z(17)
Y(18)	4	4	3	1	4	3	4	4	4	4	1	4	4	1		Z(18)	96.39	88.59	663.82	459.02	249.79	332.32	932.59	472.59	555.99	93.79	770.09	144.79	369.19	180.16			Y(18)	4	1	4	1	4	4	4	4	1	3	4	3	4	4		Z(18)
Y(19)	1	1	4	3	4	4	4	4	4	4	3	4	4	3		Z(19)	159.37	90.62	666.19	459.13	251.19	333.19	940.19	479.19	605.59	101.99	770.2	159.19	385.59	180.27			Y(19)	1	3	4	3	4	1	4	1	3	4	1	4	4	1		Z(19)
Y(20)	3	3	4	4	4	4	4	4	4	4	4	4	1	4		Z(20)	159.48	90.73	680.59	460.99	255.99	339.99	950.59	528.19	613.39	110.19	771.99	169.19	387.63	181.59			Y(20)	3	4	4	4	4	3	4	3	4	4	3	4	4	3		Z(20)
Y(21)	1	4	4	4	4	4	4	4	4	1	4	1	3	4		Z(21)	171.22	91.99	692.39	516.39	256.59	340.79	962.59	530.19	648.19	111.65	779.59	171.24	387.74	185.99			Y(21)	4	4	4	4	4	4	4	4	4	1	4	4	4	4		Z(21)
Y(22)	3	4	4	4	4	4	4	4	4	3	1	3	4	4		Z(22)	171.33	104.19	919.59	519.39	261.99	366.19	963.19	547.19	667.79	111.76	790.77	171.35	388.79	188.19			Y(22)	1	4	4	4	4	4	4	4	1	3	4	4	4	4		Z(22)
Y(23)	4	1	4	4	1	1	4	4	4	1	3	4	4	1		Z(23)	172.99	108.55	1436.19	525.39	264.7	377.61	966.19	547.59	679.59	112.04	790.88	172.59	413.79	194.02			Y(23)	3	4	4	1	4	4	1	4	3	4	1	4	4	1		Z(23)
Y(24)	4	3	4	4	3	3	4	4	4	3	4	4	4	3		Z(24)	194.19	108.66	1459.19	546.99	264.81	377.72	982.59	624.59	688.19	112.15	791.79	182.19	414.59	194.13			Y(24)	4	1	4	3	4	4	3	4	4	4	3	1	4	3		Z(24)
Y(25)	1	4	4	4	4	4	4	4	4	4	1	1	4	4		Z(25)	198.2	109.99	1697.79	548.19	267.19	379.79	983.99	626.59	713.59	113.19	805.96	188.15	560.59	195.59			Y(25)	4	3	4	4	4	4	4	4	4	4	4	3	4	4		Z(25)
Y(26)	3	4	4	1	4	1	4	4	4	4	3	3	4	4		Z(26)	198.31	120.19	1698.59	560.51	317.19	396.39	984.79	630.79	714.99	119.39	806.07	188.26	563.99	202.39			Y(26)	1	4	4	4	4	4	4	4	1	4	1	4	4	1		Z(26)
Y(27)	4	4	0	3	4	3	4	4	4	4	4	4	4	1		Z(27)	199.39	122.59	0	560.62	349.39	396.5	993.59	631.59	725.39	130.39	807.19	189.19	600.19	205.87			Y(27)	3	1	1	4	4	4	4	4	3	4	3	4	4	3		Z(27)
Y(28)	1	4	0	4	4	1	4	4	4	4	4	4	4	3		Z(28)	234.14	128.19	0	562.39	361.39	397.34	995.79	677.19	725.99	135.79	884.19	201.79	621.79	205.98			Y(28)	4	3	3	4	4	4	4	4	4	4	4	4	4	4		Z(28)
Y(29)	3	1	0	4	4	3	4	4	4	4	1	1	4	4		Z(29)	234.25	129.26	0	579.19	368.39	397.45	1015.39	687.79	732.59	139.39	885.22	206.31	647.79	206.99			Y(29)	4	4	4	4	4	4	4	4	4	1	1	4	4	4		Z(29)
Y(30)	4	3	0	4	4	1	4	4	4	1	3	3	4	4		Z(30)	235.39	129.37	0	586.59	373.99	398.23	1043.19	691.19	733.39	141.19	885.33	206.42	651.19	213.19			Y(30)	1	4	4	1	4	4	4	4	4	3	3	4	4	4		Z(30)
Y(31)	1	4	0	4	4	3	4	4	4	3	4	4	4	1		Z(31)	351.24	130.59	0	586.99	419.59	398.34	1052.99	698.59	820.79	141.3	886.39	207.19	651.59	214.99			Y(31)	3	4	4	3	4	4	4	0	1	4	4	4	4	4		Z(31)
Y(32)	3	4	0	4	4	1	4	4	4	4	1	1	4	3		Z(32)	351.35	141.79	0	587.39	419.99	399.13	1057.19	699.79	828.19	142.99	899.34	223.21	656.79	215.1			Y(32)	4	1	4	4	4	4	4	0	3	4	1	4	4	4		Z(32)
Y(33)	4	1	0	4	4	3	4	4	4	4	3	3	4	4		Z(33)	352.39	142.87	0	647.59	436.59	399.24	1100.99	700.99	831.79	148.79	899.45	223.32	658.19	216.79			Y(33)	4	3	1	1	4	4	4	0	4	4	3	4	4	4		Z(33)
Y(34)	4	3	0	4	4	4	4	4	4	4	4	4	4	4		Z(34)	367.39	142.98	0	656.19	462.79	403.79	1147.59	706.99	833.19	149.59	900.19	223.99	660.59	222.39			Y(34)	4	4	3	3	1	4	4	0	4	4	4	4	4	1		Z(34)
Y(35)	1	4	0	4	4	4	4	4	4	1	4	4	4	4		Z(35)	459.95	143.99	0	691.39	466.19	410.39	1160.79	708.19	837.59	151.65	907.39	238.99	726.99	225.59			Y(35)	1	4	4	4	3	1	4	0	4	4	1	4	1	3		Z(35)
Y(36)	3	4	0	1	4	4	4	4	4	3	4	4	4	1		Z(36)	460.06	152.79	0	695.33	471.59	419.39	1173.19	715.59	875.59	151.76	911.79	241.99	739.59	227.14			Y(36)	3	4	4	4	1	3	4	0	1	1	3	4	3	1		Z(36)
Y(37)	4	4	0	3	4	4	4	4	4	4	4	4	4	3		Z(37)	460.99	155.59	0	695.44	471.99	426.79	1196.39	723.59	878.59	152.79	912.19	244.99	740.19	227.25			Y(37)	4	4	4	4	3	4	4	0	3	3	4	4	4	3		Z(37)
Y(38)	4	1	0	4	1	4	4	4	4	1	1	4	4	4		Z(38)	471.99	157.4	0	696.99	475.96	441.99	1199.79	726.39	1107.39	191.78	915.08	245.39	741.59	228.99			Y(38)	4	1	4	1	1	4	4	0	4	4	1	4	4	4		Z(38)
Y(39)	4	3	0	4	3	1	4	4	4	3	3	4	4	4		Z(39)	476.99	157.51	0	735.79	476.07	449.19	1241.79	727.19	1108.79	191.89	915.19	248.59	744.79	235.79			Y(39)	1	3	4	3	3	4	4	0	4	1	3	4	4	4		Z(39)
Y(40)	4	4	0	4	1	3	4	4	4	4	4	1	4	4		Z(40)	483.59	158.79	0	738.59	476.95	449.3	1246.19	751.79	1112.99	193.39	916.79	250.35	750.99	236.39			Y(40)	3	4	4	4	4	4	4	0	1	3	4	4	4	4		Z(40)
Y(41)	4	4	0	4	3	1	4	4	4	4	4	3	4	1		Z(41)	532.59	169.79	0	743.19	477.06	450.83	1249.39	756.79	1113.59	209.39	922.19	250.46	778.99	237.93			Y(41)	4	1	4	4	4	4	4	0	3	4	1	4	4	4		Z(41)
Y(42)	1	1	0	4	4	3	4	4	4	4	4	4	4	3		Z(42)	608.37	170.9	0	754.99	487.99	450.94	1259.99	763.39	1118.79	211.79	925.39	251.39	781.79	238.04			Y(42)	1	3	4	4	4	4	4	0	4	4	3	1	4	4		Z(42)
Y(43)	3	3	0	1	4	4	4	4	4	1	1	4	4	4		Z(43)	608.48	171.01	0	763.56	502.59	452.39	1278.99	767.59	1121.79	212.59	926.57	275.19	828.59	239.19			Y(43)	3	4	4	1	4	1	4	0	4	1	4	3	4	1		Z(43)
Y(44)	4	4	0	3	4	4	4	4	4	3	3	1	4	4		Z(44)	610.59	172.39	0	763.67	519.19	459.19	1301.39	782.59	1142.19	212.7	926.68	278.36	896.39	245.19			Y(44)	4	4	1	3	4	3	4	0	4	3	4	4	4	3		Z(44)
Y(45)	4	4	0	4	4	1	4	4	4	4	1	3	4	4		Z(45)	646.79	187.59	0	764.99	630.99	486.25	1308.59	784.99	1143.99	215.39	927.95	278.47	899.19	246.59			Y(45)	1	1	3	4	4	4	4	0	1	4	1	4	4	4		Z(45)
Y(46)	4	1	0	1	4	3	4	4	4	4	3	4	4	1		Z(46)	650.99	188.77	0	820.13	678.79	486.36	1331.19	788.79	1148.79	222.19	928.06	279.79	899.79	249.76			Y(46)	3	3	4	4	4	4	4	0	3	1	3	4	4	4		Z(46)
Y(47)	1	3	0	3	4	4	4	4	4	4	4	4	4	3		Z(47)	671.07	188.88	0	820.24	715.59	487.19	1336.59	795.79	1153.99	224.19	928.59	292.99	900.79	249.87			Y(47)	4	4	4	4	1	4	4	0	4	3	4	4	4	4		Z(47)
Y(48)	3	4	0	4	4	4	4	4	4	1	4	1	4	4		Z(48)	671.18	189.99	0	821.39	716.19	497.79	1355.39	798.39	1154.79	230.34	932.99	294.52	956.39	250.79			Y(48)	1	1	4	1	3	4	4	0	4	4	1	4	4	1		Z(48)
Y(49)	4	4	0	1	4	4	4	4	4	3	4	3	4	4		Z(49)	672.19	199.79	0	847.65	717.79	498.39	1393.79	805.79	1173.19	230.45	942.39	294.63	998.19	257.59			Y(49)	3	3	1	3	4	4	4	0	4	1	3	4	4	3		Z(49)
Y(50)	4	1	0	3	1	1	4	4	4	4	4	4	4	1		Z(50)	740.59	201.75	0	847.76	737.9	501.5	1397.99	811.39	1241.79	231.79	947.59	295.59	999.79	261.81			Y(50)	4	4	3	4	4	4	4	0	4	3	4	4	4	4		Z(50)
Y(51)	4	3	0	4	3	3	4	4	1	4	1	4	4	3		Z(51)	766.99	201.86	0	848.99	738.01	501.61	1407.79	811.99	1414.54	238.59	951.8	314.19	1125.39	261.92			Y(51)	1	4	4	4	1	4	4	0	4	4	1	1	4	1		Z(51)
Y(52)	4	4	0	1	4	4	4	4	3	4	3	4	4	4		Z(52)	769.59	202.99	0	888.1	746.79	502.59	1416.99	815.99	1414.65	240.99	951.91	318.39	1286.59	262.99			Y(52)	3	1	4	4	3	4	4	0	4	4	3	3	4	3		Z(52)
Y(53)	1	1	0	3	4	4	4	4	1	1	4	4	4	4		Z(53)	787.56	211.2	0	888.21	871.19	510.39	1427.99	824.79	1434.69	242.29	952.59	321.19	1298.99	268.19			Y(53)	1	3	4	4	4	1	4	0	4	1	4	4	4	4		Z(53)
Y(54)	3	3	0	4	1	4	4	4	3	3	4	4	1	1		Z(54)	787.67	211.31	0	889.59	888.93	515.79	1456.79	832.59	1434.8	242.4	962.79	324.19	1301.84	269.23			Y(54)	3	4	4	4	4	3	4	0	4	3	1	4	4	4		Z(54)
Y(55)	4	4	0	4	3	1	1	1	1	4	1	4	3	3		Z(55)	790.19	212.59	0	901.19	889.04	540.37	1479.6	872.97	1438.91	243.59	964.08	327.19	1301.95	269.34			Y(55)	4	4	1	1	1	4	4	0	4	1	3	4	4	4		Z(55)
Y(56)	1	4	0	4	1	3	3	3	3	4	3	4	4	4		Z(56)	861.36	223.99	0	910.59	889.54	540.48	1479.71	873.08	1439.02	253.39	964.19	329.99	1302.99	270.59			Y(56)	1	1	3	3	3	4	4	0	4	3	4	1	4	4		Z(56)
Y(57)	3	1	0	4	3	4	1	4	4	1	1	4	4	4		Z(57)	861.47	225.19	0	916.79	889.65	541.79	1480.64	885.79	1458.59	276.74	965.28	330.59	1303.99	281.59			Y(57)	3	3	4	4	4	4	4	0	4	4	4	3	4	1		Z(57)
Y(58)	4	3	0	4	4	4	3	4	4	3	3	1	4	1		Z(58)	862.59	225.3	0	920.59	894.39	553.99	1480.75	897.39	1466.39	276.85	965.39	331.89	1326.59	283.66			Y(58)	4	4	4	4	4	4	4	0	1	4	1	4	1	3		Z(58)
Y(59)	1	4	0	1	4	1	1	4	4	4	4	3	4	3		Z(59)	938.43	225.99	0	921.97	906.59	557.43	1483.29	908.39	1473.99	278.19	966.19	332	1331.59	283.77			Y(59)	1	1	4	4	4	4	4	0	3	4	3	4	3	4		Z(59)
Y(60)	3	4	0	3	4	3	3	4	4	1	4	4	4	4		Z(60)	938.54	233.79	0	922.08	954.39	557.54	1483.4	912.59	1482.39	290.57	970.59	332.99	1332.39	284.79			Y(60)	3	3	4	1	4	4	4	0	4	1	4	4	4	4		Z(60)
Y(61)	4	1	0	4	4	4	4	4	4	3	4	4	4	4		Z(61)	939.79	240.81	0	923.19	955.59	558.59	1487.19	913.59	1498.79	290.68	983.59	346.39	1334.99	291.79			Y(61)	4	4	1	3	4	4	4	0	4	3	4	4	4	1		Z(61)
Y(62)	1	3	0	1	1	4	4	4	4	4	1	4	4	4		Z(62)	968.24	240.92	0	962.59	957.51	570.79	1498.39	924.19	1517.39	291.39	984.63	348.59	1339.39	294.99			Y(62)	1	4	3	4	4	4	4	0	4	4	4	4	4	3		Z(62)
Y(63)	3	4	0	3	3	1	4	4	4	4	3	4	4	1		Z(63)	968.35	241.99	0	962.7	957.62	579.9	1505.79	924.59	1578.99	299.99	984.74	351.79	1355.59	296.06			Y(63)	3	1	4	1	1	4	4	0	4	4	4	4	4	4		Z(63)
Y(64)	4	1	0	4	1	3	4	4	4	1	4	1	4	3		Z(64)	969.39	250.68	0	963.99	958.07	580.01	1532.19	924.99	1585.19	300.99	985.59	353.21	1355.99	296.17			Y(64)	4	3	4	3	3	4	1	0	4	1	1	4	4	4		Z(64)
Y(65)	1	3	0	4	3	4	4	4	4	3	4	3	4	4		Z(65)	984.5	250.79	0	996.39	958.18	581.39	1532.59	926.99	1588.39	301.1	995.79	353.32	1417.59	297.59			Y(65)	1	4	4	4	4	1	3	0	4	3	3	4	4	4		Z(65)
Y(66)	3	4	0	1	4	4	4	4	4	4	4	4	4	4		Z(66)	984.61	251.79	0	1020.57	962.99	590.59	1575.39	930.99	1660.39	301.79	997.99	354.19	1417.99	308.39			Y(66)	3	1	4	1	4	3	4	0	4	4	4	4	4	1		Z(66)
Y(67)	4	4	0	3	4	4	4	4	4	4	4	4	4	1		Z(67)	985.79	261.59	0	1020.68	987.19	595.19	1593.79	932.99	1661.79	309.59	999.99	371.99	1421.39	309.83			Y(67)	4	3	4	3	1	4	4	0	4	4	4	1	4	3		Z(67)
Y(68)	4	4	0	4	4	4	4	4	4	4	1	4	1	3		Z(68)	1001.39	261.99	0	1021.59	1002.79	596.59	1609.19	937.39	1664.79	313.59	1001.05	376.99	1446.5	309.94			Y(68)	1	4	1	4	3	4	4	0	4	1	4	3	1	4		Z(68)
Y(69)	4	1	0	4	4	4	4	4	0	1	3	4	3	4		Z(69)	1010.99	263.44	0	1046.39	1005.59	601.79	1625.19	938.19	0	315.66	1001.16	377.79	1446.61	311.19			Y(69)	3	1	3	4	4	4	4	0	4	3	4	4	3	1		Z(69)
Y(70)	1	3	0	4	4	1	4	4	0	3	4	4	4	4		Z(70)	1013.59	263.55	0	1047.19	1060.39	603.11	1680.59	942.19	0	315.77	1002.19	386.59	1447.99	316.19			Y(70)	0	3	4	4	4	4	4	0	4	4	4	4	4	3		Z(70)
Y(71)	3	4	0	1	4	3	4	4	0	4	4	4	4	1		Z(71)	1013.7	264.59	0	1064.62	1075.39	603.22	1710.99	947.59	0	316.79	1011.99	387.59	1515.79	318.54			Y(71)	0	4	4	4	4	4	4	0	4	1	4	4	4	4		Z(71)
Y(72)	0	4	0	3	4	1	4	4	0	4	4	4	4	3		Z(72)	0	269.79	0	1064.73	1076.59	603.95	1755.19	968.19	0	354.99	1013.79	389.59	1568.79	318.65			Y(72)	0	4	4	4	1	4	4	0	4	3	4	4	1	1		Z(72)
Y(73)	0	1	0	4	4	3	4	4	0	1	1	4	4	4		Z(73)	0	271.4	0	1065.99	1225.99	604.06	1774.99	989.59	0	356.13	1015.08	392.79	1569.59	320.19			Y(73)	0	4	4	4	3	4	4	0	4	4	4	4	3	3		Z(73)
Y(74)	0	3	0	4	4	4	0	4	0	3	3	4	4	4		Z(74)	0	271.51	0	1091.99	1394.59	604.99	0	1002.99	0	356.24	1015.19	394.99	1580.79	328.39			Y(74)	0	1	4	4	4	4	4	0	4	1	1	4	4	4		Z(74)
Y(75)	0	4	0	1	4	4	0	4	0	4	4	4	4	1		Z(75)	0	272.79	0	1096.99	1395.59	613.39	0	1006.99	0	356.99	1015.99	397.79	1647.59	330.13			Y(75)	0	3	4	1	4	4	4	0	4	3	3	4	1	1		Z(75)
Y(76)	0	4	0	3	4	4	0	4	0	4	4	1	4	3		Z(76)	0	284.79	0	1097.1	1513.19	622.99	0	1012.59	0	368.39	1022.99	402.15	1649.99	330.24			Y(76)	0	4	4	3	1	4	4	0	4	4	0	4	3	3		Z(76)
Y(77)	0	1	0	4	4	4	0	4	0	1	1	3	4	4		Z(77)	0	286.48	0	1098.19	1513.79	629.59	0	1014.99	0	369.5	1024.05	402.26	1685.59	331.39			Y(77)	0	1	4	4	3	4	4	0	4	4	0	1	4	4		Z(77)
Y(78)	0	3	0	1	1	4	0	4	0	3	3	4	4	1		Z(78)	0	286.59	0	1122.77	1522.16	655.79	0	1024.19	0	369.61	1024.16	403.19	1727.99	339.5			Y(78)	0	3	4	4	4	4	4	0	4	4	0	3	4	1		Z(78)
Y(79)	0	4	0	3	3	1	0	4	0	4	4	4	4	3		Z(79)	0	287.39	0	1122.88	1522.27	657.79	0	1068.79	0	370.19	1025.19	424.19	1734.19	339.61			Y(79)	0	4	4	4	1	4	4	0	4	1	0	4	4	3		Z(79)
Y(80)	0	4	0	4	1	3	0	4	0	4	1	1	4	4		Z(80)	0	297.79	0	1124.39	1523.24	657.9	0	1090.39	0	375.79	1070.33	435.74	1742.99	340.99			Y(80)	0	4	4	1	3	4	4	0	4	3	0	4	4	4		Z(80)
Y(81)	0	1	0	4	3	0	0	4	0	4	3	3	4	1		Z(81)	0	298.9	0	1165.59	1523.35	0	0	1097.19	0	376.19	1070.44	435.85	1757.19	348.38			Y(81)	0	4	4	3	4	4	4	0	4	4	0	1	4	4		Z(81)
Y(82)	0	3	0	1	1	0	0	4	0	4	4	4	4	3		Z(82)	0	299.01	0	1170.3	1527.13	0	0	1234.79	0	441.59	1071.19	436.59	1764.19	348.49			Y(82)	0	1	4	4	1	4	4	0	4	4	0	3	4	1		Z(82)
Y(83)	0	0	0	3	3	0	0	4	0	4	4	4	0	4		Z(83)	0	0	0	1170.41	1527.24	0	0	1237.79	0	448.19	1080.39	455.39	0	349.59			Y(83)	0	3	4	4	3	4	4	0	4	1	0	4	4	3		Z(83)
Y(84)	0	0	0	4	1	0	0	4	0	4	1	4	0	4		Z(84)	0	0	0	1171.79	1529.26	0	0	1280.39	0	449.19	1082.64	458.59	0	360.59			Y(84)	0	0	1	1	1	4	4	0	4	3	0	4	4	0		Z(84)
Y(85)	0	0	0	1	3	0	0	4	0	1	3	4	0	4		Z(85)	0	0	0	1200.02	1529.37	0	0	1284.59	0	491.01	1082.75	461.79	0	363.79			Y(85)	0	0	3	3	3	4	4	0	4	0	0	1	4	0		Z(85)
Y(86)	0	0	0	3	4	0	0	4	0	3	0	4	0	4		Z(86)	0	0	0	1200.13	1532.19	0	0	1289.99	0	491.12	0	464.99	0	385.79			Y(86)	0	0	4	4	1	4	4	0	4	0	0	3	4	0		Z(86)
Y(87)	0	0	0	4	4	0	0	4	0	0	0	4	0	4		Z(87)	0	0	0	1201.39	1534.59	0	0	1300.99	0	0	0	467.59	0	390.19			Y(87)	0	0	4	1	3	4	4	0	4	0	0	4	4	0		Z(87)
Y(88)	0	0	0	4	4	0	0	4	0	0	0	4	0	4		Z(88)	0	0	0	1220.39	1553.19	0	0	1323.19	0	0	0	468.59	0	391.19			Y(88)	0	0	4	3	1	4	4	0	4	0	0	4	4	0		Z(88)
Y(89)	0	0	0	1	4	0	0	4	0	0	0	4	0	4		Z(89)	0	0	0	1229.45	1570.19	0	0	1323.79	0	0	0	480.39	0	405.99			Y(89)	0	0	1	4	3	4	4	0	0	0	0	4	4	0		Z(89)
Y(90)	0	0	0	3	1	0	0	4	0	0	0	4	0	1		Z(90)	0	0	0	1229.56	1656.17	0	0	1346.59	0	0	0	489.39	0	440.99			Y(90)	0	0	3	4	4	4	4	0	0	0	0	4	1	0		Z(90)
Y(91)	0	0	0	4	3	0	0	4	0	0	0	1	0	3		Z(91)	0	0	0	1230.59	1656.28	0	0	1355.59	0	0	0	491.23	0	441.1			Y(91)	0	0	4	4	1	4	4	0	0	0	0	4	3	0		Z(91)
Y(92)	0	0	0	1	4	0	0	4	0	0	0	3	0	4		Z(92)	0	0	0	1248.44	1660.19	0	0	1360.19	0	0	0	491.34	0	443.99			Y(92)	0	0	4	1	3	4	4	0	0	0	0	4	4	0		Z(92)
Y(93)	0	0	0	3	4	0	0	4	0	0	0	4	0	4		Z(93)	0	0	0	1248.55	1660.99	0	0	1395.39	0	0	0	492.39	0	451.39			Y(93)	0	0	4	3	4	4	1	0	0	0	0	1	4	0		Z(93)
Y(94)	0	0	0	4	1	0	0	4	0	0	0	4	0	4		Z(94)	0	0	0	1249.79	1713.73	0	0	1400.19	0	0	0	508.59	0	452.99			Y(94)	0	0	4	4	0	4	3	0	0	0	0	3	4	0		Z(94)
Y(95)	0	0	0	4	3	0	0	4	0	0	0	4	0	4		Z(95)	0	0	0	1290.79	1713.84	0	0	1404.79	0	0	0	525.59	0	456.99			Y(95)	0	0	4	4	0	4	4	0	0	0	0	4	4	0		Z(95)
Y(96)	0	0	0	1	4	0	0	4	0	0	0	4	0	1		Z(96)	0	0	0	1292.16	1718.59	0	0	1410.59	0	0	0	530.59	0	464.19			Y(96)	0	0	1	1	0	4	4	0	0	0	0	4	4	0		Z(96)
Y(97)	0	0	0	3	0	0	0	1	0	0	0	4	0	3		Z(97)	0	0	0	1292.27	0	0	0	1423.41	0	0	0	541.19	0	464.3			Y(97)	0	0	3	3	0	4	4	0	0	0	0	4	4	0		Z(97)
Y(98)	0	0	0	0	0	0	0	3	0	0	0	1	0	1		Z(98)	0	0	0	0	0	0	0	1423.52	0	0	0	546.32	0	464.72			Y(98)	0	0	4	0	0	4	1	0	0	0	0	1	4	0		Z(98)
Y(99)	0	0	0	0	0	0	0	1	0	0	0	3	0	3		Z(99)	0	0	0	0	0	0	0	1426.85	0	0	0	546.43	0	464.83			Y(99)	0	0	4	0	0	0	3	0	0	0	0	3	4	0		Z(99)
Y(100)	0	0	0	0	0	0	0	3	0	0	0	4	0	0		Z(100)	0	0	0	0	0	0	0	1426.96	0	0	0	547.39	0	0			Y(100)	0	0	1	0	0	0	4	0	0	0	0	4	4	0		Z(100)
Y(101)	0	0	0	0	0	0	0	4	0	0	0	1	0	0		Z(101)	0	0	0	0	0	0	0	1434.79	0	0	0	571.13	0	0			Y(101)	0	0	3	0	0	0	4	0	0	0	0	4	0	0		Z(101)
Y(102)	0	0	0	0	0	0	0	4	0	0	0	3	0	0		Z(102)	0	0	0	0	0	0	0	1439.59	0	0	0	571.24	0	0			Y(102)	0	0	4	0	0	0	4	0	0	0	0	4	0	0		Z(102)
Y(103)	0	0	0	0	0	0	0	4	0	0	0	4	0	0		Z(103)	0	0	0	0	0	0	0	1453.79	0	0	0	571.99	0	0			Y(103)	0	0	4	0	0	0	4	0	0	0	0	1	0	0		Z(103)
Y(104)	0	0	0	0	0	0	0	4	0	0	0	4	0	0		Z(104)	0	0	0	0	0	0	0	1458.39	0	0	0	591.59	0	0			Y(104)	0	0	4	0	0	0	0	0	0	0	0	3	0	0		Z(104)
Y(105)	0	0	0	0	0	0	0	4	0	0	0	4	0	0		Z(105)	0	0	0	0	0	0	0	1462.79	0	0	0	594.19	0	0			Y(105)	0	0	1	0	0	0	0	0	0	0	0	4	0	0		Z(105)
Y(106)	0	0	0	0	0	0	0	4	0	0	0	1	0	0		Z(106)	0	0	0	0	0	0	0	1467.19	0	0	0	595.8	0	0			Y(106)	0	0	3	0	0	0	0	0	0	0	0	4	0	0		Z(106)
Y(107)	0	0	0	0	0	0	0	4	0	0	0	3	0	0		Z(107)	0	0	0	0	0	0	0	1479.99	0	0	0	595.91	0	0			Y(107)	0	0	4	0	0	0	0	0	0	0	0	1	0	0		Z(107)
Y(108)	0	0	0	0	0	0	0	4	0	0	0	4	0	0		Z(108)	0	0	0	0	0	0	0	1482.79	0	0	0	596.79	0	0			Y(108)	0	0	4	0	0	0	0	0	0	0	0	3	0	0		Z(108)
Y(109)	0	0	0	0	0	0	0	4	0	0	0	1	0	0		Z(109)	0	0	0	0	0	0	0	1550.39	0	0	0	616.3	0	0			Y(109)	0	0	1	0	0	0	0	0	0	0	0	4	0	0		Z(109)
Y(110)	0	0	0	0	0	0	0	4	0	0	0	3	0	0		Z(110)	0	0	0	0	0	0	0	1576.59	0	0	0	616.41	0	0			Y(110)	0	0	3	0	0	0	0	0	0	0	0	4	0	0		Z(110)
Y(111)	0	0	0	0	0	0	0	4	0	0	0	0	0	0		Z(111)	0	0	0	0	0	0	0	1614.79	0	0	0	0	0	0			Y(111)	0	0	4	0	0	0	0	0	0	0	0	4	0	0		Z(111)
Y(112)	0	0	0	0	0	0	0	4	0	0	0	0	0	0		Z(112)	0	0	0	0	0	0	0	1621.19	0	0	0	0	0	0			Y(112)	0	0	0	0	0	0	0	0	0	0	0	1	0	0		Z(112)
Y(113)	0	0	0	0	0	0	0	4	0	0	0	0	0	0		Z(113)	0	0	0	0	0	0	0	1655.79	0	0	0	0	0	0			Y(113)	0	0	0	0	0	0	0	0	0	0	0	3	0	0		Z(113)
Y(114)	0	0	0	0	0	0	0	4	0	0	0	0	0	0		Z(114)	0	0	0	0	0	0	0	1693.59	0	0	0	0	0	0			Y(114)	0	0	0	0	0	0	0	0	0	0	0	4	0	0		Z(114)
Y(115)	0	0	0	0	0	0	0	4	0	0	0	0	0	0		Z(115)	0	0	0	0	0	0	0	1699.59	0	0	0	0	0	0			Y(115)	0	0	0	0	0	0	0	0	0	0	0	4	0	0		Z(115)
Y(116)	0	0	0	0	0	0	0	4	0	0	0	0	0	0		Z(116)	0	0	0	0	0	0	0	1700.79	0	0	0	0	0	0			Y(116)	0	0	0	0	0	0	0	0	0	0	0	4	0	0		Z(116)
Y(117)	0	0	0	0	0	0	0	4	0	0	0	0	0	0		Z(117)	0	0	0	0	0	0	0	1709.19	0	0	0	0	0	0			Y(117)	0	0	0	0	0	0	0	0	0	0	0	1	0	0		Z(117)
Y(118)	0	0	0	0	0	0	0	4	0	0	0	0	0	0		Z(118)	0	0	0	0	0	0	0	1721.19	0	0	0	0	0	0			Y(118)	0	0	0	0	0	0	0	0	0	0	0	3	0	0		Z(118)
																																	Y(119)	0	0	0	0	0	0	0	0	0	0	0	4	0	0		Z(119)
																																	Y(120)	0	0	0	0	0	0	0	0	0	0	0	4	0	0		Z(120)
																																	Y(121)	0	0	0	0	0	0	0	0	0	0	0	4	0	0		Z(121)
																																	Y(122)	0	0	0	0	0	0	0	0	0	0	0	4	0	0		Z(122)
																																	Y(123)	0	0	0	0	0	0	0	0	0	0	0	1	0	0		Z(123)
																																	Y(124)	0	0	0	0	0	0	0	0	0	0	0	3	0	0		Z(124)
																																	Y(125)	0	0	0	0	0	0	0	0	0	0	0	4	0	0		Z(125)
																																	Y(126)	0	0	0	0	0	0	0	0	0	0	0	4	0	0		Z(126)
																																	Y(127)	0	0	0	0	0	0	0	0	0	0	0	4	0	0		Z(127)
																																	Y(128)	0	0	0	0	0	0	0	0	0	0	0	4	0	0		Z(128)
																																	Y(129)	0	0	0	0	0	0	0	0	0	0	0	4	0	0		Z(129)
																																	Y(130)	0	0	0	0	0	0	0	0	0	0	0	4	0	0		Z(130)
																																	Y(131)	0	0	0	0	0	0	0	0	0	0	0	4	0	0		Z(131)
																																	Y(132)	0	0	0	0	0	0	0	0	0	0	0	4	0	0		Z(132)
																																	Y(133)	0	0	0	0	0	0	0	0	0	0	0	4	0	0		Z(133)
																																	Y(134)	0	0	0	0	0	0	0	0	0	0	0	4	0	0		Z(134)
																																	Y(135)	0	0	0	0	0	0	0	0	0	0	0	4	0	0		Z(135)
																																	Y(136)	0	0	0	0	0	0	0	0	0	0	0	4	0	0		Z(136)
																																	Y(137)	0	0	0	0	0	0	0	0	0	0	0	1	0	0		Z(137)
																																	Y(138)	0	0	0	0	0	0	0	0	0	0	0	3	0	0		Z(138)
																																	Y(139)	0	0	0	0	0	0	0	0	0	0	0	4	0	0		Z(139)
																																	Y(140)	0	0	0	0	0	0	0	0	0	0	0	4	0	0		Z(140)
																																	Y(141)	0	0	0	0	0	0	0	0	0	0	0	4	0	0		Z(141)
																																	Y(142)	0	0	0	0	0	0	0	0	0	0	0	4	0	0		Z(142)
																																	Y(143)	0	0	0	0	0	0	0	0	0	0	0	4	0	0		Z(143)
																																	Y(144)	0	0	0	0	0	0	0	0	0	0	0	4	0	0		Z(144)
																																	Y(145)	0	0	0	0	0	0	0	0	0	0	0	4	0	0		Z(145)
																																	Y(146)	0	0	0	0	0	0	0	0	0	0	0	4	0	0		Z(146)
																																	Y(147)	0	0	0	0	0	0	0	0	0	0	0	4	0	0		Z(147)
																																	Y(148)	0	0	0	0	0	0	0	0	0	0	0	4	0	0		Z(148)
																																	Y(149)	0	0	0	0	0	0	0	0	0	0	0	4	0	0		Z(149)
																																	Y(150)	0	0	0	0	0	0	0	0	0	0	0	4	0	0		Z(150)
																																	Y(151)	0	0	0	0	0	0	0	0	0	0	0	4	0	0		Z(151)
																																	Y(152)	0	0	0	0	0	0	0	0	0	0	0	4	0	0		Z(152)
																																	Y(153)	0	0	0	0	0	0	0	0	0	0	0	1	0	0		Z(153)
																																	Y(154)	0	0	0	0	0	0	0	0	0	0	0	3	0	0		Z(154)
[truncated: 494 more columns]
