# Supplementary material for: A corticostriatal deficit promotes temporal distortion of automatic action in ageing
Source: eLife journal article supplement (doi:10.7554/elife.29908), 2017-10-23
Supplement: supp [file elife-29908-supp-v1.zip › elife_poa_e29908_Figure_5_source_data_2.xlsx]

## Sheet: Sequence extracts
\Experiment code: MSM012
\Experiment summary: 2 Drd1a-Cre:Drd2-EGFP mice were injected with AAV2-hSyn-DIO-hM4Di-mCherry virus in the posterior DLS in one hemisphere (counterbalanced). Mice were allowed to recover for 3 weeks and then receibved an injection of CNO (3 mg/kg) followed by an injection of GBR12783 (15 mg/kg) 30 min later. Mice were intracardiacally perfused 45 min after the CNO injection.
\Data type and description: Drd1a-Cre:Drd2-EGFP::hM4Di, CNO+GBR treated. Effect of DREADDs on D1-SPNs activation by GBR. Quantification of p-MAPK+ neurons in infected area of infected side, versus a comparable area (dorsolateral sriatum) in the contralateral noninfected side.
\Authors: Miriam Matamales (ORCID: 0000-0001-9978-0091) and J Bertran-Gonzalez (ORCID: 0000-0002-3794-1782)
Image	Side	area ROI (um2)	areaROI (mm2)	PMAPK Count	Density
MSM012_IF170814_199_4L.ome-0003:198_1L	Infect	1.03874e+06	1.03874	5	4.81352
MSM012_IF170814_199_4L.ome-0003:198_4L	Infect	1.07262e+06	1.07262	9	8.39065
MSM012_IF170814_199_4L.ome-0003:198_5R	Infect	1.15189e+06	1.15189	8	6.94512
MSM012_IF170814_199_4L.ome-0003:199_2R	Infect	486373	0.486373	18	37.0086
MSM012_IF170814_199_4L.ome-0003:199_3R	Infect	484869	0.484869	21	43.3107
MSM012_IF170814_199_4L.ome-0003:199_4R	Infect	730532	0.730532	39	53.3858
MSM012_IF170814_199_4L.ome-0003:198_1R	NonInj	1.23068e+06	1.23068	316	256.768
MSM012_IF170814_199_4L.ome-0003:198_4R	NonInj	950094	0.950094	236	248.396
MSM012_IF170814_199_4L.ome-0003:198_5L	NonInj	867691	0.867691	266	306.561
MSM012_IF170814_199_4L.ome-0003:199_2L	NonInj	783155	0.783155	276	352.421
MSM012_IF170814_199_4L.ome-0003:199_3L	NonInj	906128	0.906128	312	344.322
MSM012_IF170814_199_4L.ome-0003:199_4l	NonInj	1.06784e+06	1.06784	279	261.275
