# Supplementary material for: A corticostriatal deficit promotes temporal distortion of automatic action in ageing
Source: eLife journal article supplement (doi:10.7554/elife.29908), 2017-10-23
Supplement: supp [file elife-29908-supp-v1.zip › elife_poa_e29908_Figure_6_source_data_1.xlsx]

## Sheet: Days 1-29
\Experiment code: JBG013
\Experiment summary: 15 aged mice (Lost (L) and Maintained (M); C57Bl6/J 20-22 months old) were submitted to instrumental training (increasing random ratio schedule of reinfocement). CRF (days 1-3): constant reinforcement; RR5 (days 4-6): random ratio 5; RR10 (days 7-12): random ratio 10; RR20 (days 13-36): random ratio 20. Active lever counterbalanced (Left [L] or Right [R]). \Sequence Trigger: …
\Data type and description: event-time stamp data. The time at which each event occurred (Y matrix, values 1-4) was stamped with a 10 ms resolution (Z matrix, centiseconds). Y matrix: 1=active response; 2=inactive response; 3=delivered pellet; 4=Magazine entry (time-controlled; consecutive entries within 200ms are not repeatedly stamped). Data were obtained through MED STATE NOTATION (MED Associa…
\Authors: J Bertran-Gonzalez (ORCID: 0000-0002-3794-1782)
DAY 1																																			DAY 2
Y Matrix (event stamp)																	Z Matrix (time stamp)																		Y Matrix (event stamp)
Subject	B1_L	R1_L	B2_L	B3_M	R3_L	R4_M	B4_L	R5_M	B5_L	B6_M	R6_L	B7_M	R7_L	R8_M	B8_L		Subject	B1_L	R1_L	B2_L	B3_M	R3_L	R4_M	B4_L	R5_M	B5_L	B6_M	R6_L	B7_M	R7_L	R8_M	B8_L			Subject	B1_L	R1_L	B2_L	B3_M	R3_L	R4_M	B4_L	R5_M	B5_L	B6_M	R6_L	B7_M	R7_L	R8_M
Start Date	06/29/14	06/29/14	06/29/14	06/29/14	06/29/14	06/29/14	06/29/14	06/29/14	06/29/14	06/29/14	06/29/14	06/29/14	06/29/14	06/29/14	06/29/14		Start Date	06/29/14	06/29/14	06/29/14	06/29/14	06/29/14	06/29/14	06/29/14	06/29/14	06/29/14	06/29/14	06/29/14	06/29/14	06/29/14	06/29/14	06/29/14			Start Date	06/30/14	06/30/14	06/30/14	06/30/14	06/30/14	06/30/14	06/30/14	06/30/14	06/30/14	06/30/14	06/30/14	06/30/14	06/30/14	06/30/14
Start Time	10:42:30	11:31:39	11:31:39	10:42:30	11:31:39	10:42:30	11:31:40	10:42:30	11:31:40	10:42:30	11:31:40	10:42:30	11:31:40	10:42:30	11:31:40		Start Time	10:42:30	11:31:39	11:31:39	10:42:30	11:31:39	10:42:30	11:31:40	10:42:30	11:31:40	10:42:30	11:31:40	10:42:30	11:31:40	10:42:30	11:31:40			Start Time	09:41:52	10:37:30	10:37:30	09:41:52	10:37:30	09:41:52	10:37:30	09:41:52	10:37:30	09:41:52	10:37:30	09:41:52	10:37:30	09:41:52
Experiment	JBG013	JBG013	JBG013	JBG013	JBG013	JBG013	JBG013	JBG013	JBG013	JBG013	JBG013	JBG013	JBG013	JBG013	JBG013		Experiment	JBG013	JBG013	JBG013	JBG013	JBG013	JBG013	JBG013	JBG013	JBG013	JBG013	JBG013	JBG013	JBG013	JBG013	JBG013			Experiment	JBG013	JBG013	JBG013	JBG013	JBG013	JBG013	JBG013	JBG013	JBG013	JBG013	JBG013	JBG013	JBG013	JBG013
Box	1	1	2	3	3	4	4	5	5	6	6	7	7	8	8		Box	1	1	2	3	3	4	4	5	5	6	6	7	7	8	8			Box	1	1	2	3	3	4	4	5	5	6	6	7	7	8
Total Active Reponses (1)	20	20	20	20	20	20	20	5	20	5	20	20	4	20	20		Total Active Reponses (1)	20	20	20	20	20	20	20	5	20	5	20	20	4	20	20			Total Active Reponses (1)	20	20	20	20	20	20	20	9	20	20	20	20	20	20
Total Inactive Reponses (2)	12	14	13	36	50	40	8	7	9	11	23	10	37	3	6		Total Inactive Reponses (2)	12	14	13	36	50	40	8	7	9	11	23	10	37	3	6			Total Inactive Reponses (2)	0	19	0	27	7	10	2	8	19	8	0	3	31	13
Magazine Entries (4)	92	38	109	95	81	167	43	221	116	116	62	59	112	71	34		Magazine Entries (4)	92	38	109	95	81	167	43	221	116	116	62	59	112	71	34			Magazine Entries (4)	30	36	29	51	25	75	30	75	54	38	29	31	128	33
Delivered Pellets (3)	20	20	20	20	20	20	20	5	20	5	20	20	4	20	20		Delivered Pellets (3)	20	20	20	20	20	20	20	5	20	5	20	20	4	20	20			Delivered Pellets (3)	20	20	20	20	20	20	20	9	20	20	20	20	20	20
Raw Mag Entries	109	53	110	122	96	278	54	242	124	132	74	65	116	79	38		Raw Mag Entries	109	53	110	122	96	278	54	242	124	132	74	65	116	79	38			Raw Mag Entries	34	47	31	60	31	108	35	83	56	38	29	36	138	35
Time (centiseconds)	70085	117043	114823	129228	86877	153808	70260	180001	80894	180001	90011	118066	180001	79825	103270		Time (centiseconds)	70085	117043	114823	129228	86877	153808	70260	180001	80894	180001	90011	118066	180001	79825	103270			Time (centiseconds)	39351	113579	48328	131013	47898	52514	51112	180001	54661	97615	42775	40636	160240	57609
# of Stamped Events	144	92	162	171	171	247	91	238	165	137	125	109	157	114	80		# of Stamped Events	144	92	162	171	171	247	91	238	165	137	125	109	157	114	80			# of Stamped Events	70	95	69	118	72	125	72	101	113	86	69	74	199	86
Y(1)	2	2	1	1	4	2	4	1	4	4	4	4	1	4	4		Z(1)	18.61	24.12	17.17	12.94	7.39	11.68	21.39	9.61	9.19	3.19	8.39	20.99	18.36	11.79	37.19			Y(1)	1	1	1	1	1	1	1	4	1	1	4	4	4	2
Y(2)	4	2	3	3	4	2	2	3	4	4	1	2	3	4	2		Z(2)	24.99	42.01	17.28	13.05	19.19	13.69	42.33	9.72	15.79	15.59	20.12	23.3	18.47	12.39	45.82			Y(2)	3	3	3	3	3	3	3	4	3	3	1	1	2	2
Y(3)	2	1	4	4	4	2	2	1	2	4	3	2	4	2	2		Z(3)	27.82	56.35	29.79	21.79	20.79	16.03	44.48	13.86	18.98	126.19	20.23	58.06	25.59	23.66	64.72			Y(3)	4	4	4	4	4	1	4	1	4	4	3	3	2	2
Y(4)	4	3	4	4	4	2	2	3	2	4	1	2	4	2	4		Z(4)	36.19	56.46	53.19	33.19	22.79	16.7	46.35	13.97	21.17	126.99	22.11	75.16	41.19	30.21	87.19			Y(4)	4	4	1	4	1	3	1	3	1	4	4	1	2	2
Y(5)	1	4	4	4	2	4	2	1	2	4	3	4	4	1	4		Z(5)	40.06	62.39	59.19	40.99	27.16	18.99	48.73	27.97	23.58	127.79	22.22	147.99	43.79	48.79	105.59			Y(5)	4	2	3	2	3	1	3	1	3	4	4	3	2	2
Y(6)	3	4	4	4	2	4	4	3	2	2	1	4	4	3	4		Z(6)	40.17	78.19	72.79	44.79	31.55	19.99	50.19	28.08	25.82	140.08	23.43	159.19	49.59	48.9	159.39			Y(6)	1	1	4	4	1	3	4	3	4	4	1	4	1	1
Y(7)	4	2	4	4	2	2	1	4	4	4	3	4	4	4	4		Z(7)	43.59	100.6	79.19	61.59	34.71	21.72	53.87	34.19	43.59	180.39	23.54	256.39	83.19	52.19	227.59			Y(7)	3	3	4	1	3	4	1	4	4	4	3	4	3	3
Y(8)	4	1	4	1	4	2	3	4	4	4	4	1	2	4	4		Z(8)	54.19	125.26	79.79	67.9	42.79	21.92	53.98	44.39	55.79	211.39	25.79	279.11	101.5	82.59	230.99			Y(8)	4	4	4	3	1	4	3	4	2	4	4	1	1	4
Y(9)	4	3	4	3	4	2	1	4	4	4	4	3	4	4	1		Z(9)	55.79	125.37	83.19	68.01	44.39	21.99	55.75	55.19	83.79	228.59	30.19	279.22	118.59	88.39	264.78			Y(9)	1	4	1	4	3	4	1	4	2	1	1	3	3	4
Y(10)	4	1	4	1	2	2	3	4	4	4	4	1	4	4	3		Z(10)	59.79	128.28	94.99	71.02	47.57	24.91	55.86	67.19	84.39	248.79	36.19	283.16	129.99	95.19	264.89			Y(10)	3	1	3	4	4	4	3	4	2	3	3	4	4	4
Y(11)	4	3	4	3	4	2	1	4	2	4	4	3	4	4	1		Z(11)	63.99	128.39	95.39	71.13	51.19	29	58.03	71.99	85.5	255.79	51.39	283.27	139.39	106.19	269.2			Y(11)	4	3	4	4	4	4	4	4	1	4	4	4	4	4
Y(12)	4	4	4	4	4	2	3	4	4	4	4	4	4	4	3		Z(12)	66.19	131.39	95.99	74.39	53.19	29.97	58.14	73.59	92.59	407.39	56.19	287.99	157.19	106.99	269.31			Y(12)	1	4	4	4	4	4	4	4	3	4	1	2	4	1
Y(13)	4	4	4	4	1	2	4	4	4	4	2	4	4	4	4		Z(13)	69.59	138.79	97.59	83.99	57.19	30.01	61.39	74.99	103.79	426.19	85.59	302.19	164.79	110.79	275.19			Y(13)	3	4	1	4	4	4	4	4	4	4	3	2	4	3
Y(14)	4	4	4	4	3	2	4	4	4	4	2	4	2	4	4		Z(14)	75.39	176.19	100.79	97.19	57.3	30.51	61.79	123.99	104.39	427.19	96.49	322.59	177.05	113.19	283.39			Y(14)	4	4	3	4	2	4	2	4	4	4	1	2	4	4
Y(15)	4	4	4	4	1	2	4	4	1	4	2	4	2	4	4		Z(15)	77.79	269.79	121.59	98.79	59.48	30.87	69.19	142.19	108.69	428.19	97.64	325.59	178.27	119.99	298.99			Y(15)	1	2	4	1	1	4	1	4	1	4	3	1	4	4
Y(16)	4	4	4	4	3	2	4	4	3	4	4	4	2	4	4		Z(16)	79.19	270.59	135.79	103.19	59.59	31	79.19	145.39	108.8	431.79	110.19	327.79	178.41	122.79	306.59			Y(16)	3	2	4	3	3	4	3	4	3	1	4	3	4	4
Y(17)	4	1	4	2	1	4	4	4	4	4	4	4	2	4	4		Z(17)	83.79	309.16	172.79	118.57	61.04	32.39	93.19	147.19	111.19	435.39	110.79	328.79	186.41	162.19	331.79			Y(17)	4	2	1	4	4	4	4	4	4	3	4	1	4	1
Y(18)	4	3	4	2	3	4	4	4	4	4	4	4	2	4	4		Z(18)	86.79	309.27	173.19	126.14	61.15	38.19	96.39	150.39	125.59	436.59	114.19	330.99	187.31	171.99	464.99			Y(18)	1	2	3	4	4	4	4	4	4	4	1	3	4	3
Y(19)	4	4	4	2	1	4	4	4	4	4	4	4	2	4	2		Z(19)	90.99	312.79	175.79	129.12	63.66	39.19	98.99	152.39	129.99	472.19	160.39	347.39	189.05	178.59	605.19			Y(19)	3	4	4	4	4	4	4	4	2	4	3	4	4	4
Y(20)	4	4	4	2	3	2	1	4	4	4	4	4	4	1	4		Z(20)	93.19	336.99	177.59	195.58	63.77	44.48	106.05	213.59	132.99	473.39	160.79	406.59	209.79	194.06	629.19			Y(20)	4	1	4	4	1	2	1	4	4	2	1	4	4	4
Y(21)	2	4	4	4	4	4	3	4	4	4	4	4	4	3	2		Z(21)	99.11	365.19	179.19	229.19	67.99	47.19	106.16	218.59	139.59	476.39	161.79	440.79	245.39	194.17	632.56			Y(21)	1	3	1	4	3	2	3	4	1	2	3	4	1	4
Y(22)	4	1	4	4	4	4	4	4	4	4	1	4	4	4	1		Z(22)	111.59	369.16	179.99	250.99	75.99	47.59	110.19	243.79	144.59	479.79	183.57	443.99	247.79	195.79	647.89			Y(22)	3	4	3	4	4	2	4	4	3	2	4	1	3	1
Y(23)	4	3	4	2	4	1	4	4	4	4	3	4	4	4	3		Z(23)	120.19	369.27	183.19	253.96	88.99	51.5	118.39	248.19	147.79	480.39	183.68	462.19	252.19	226.39	648			Y(23)	4	4	4	2	2	4	1	4	4	2	4	3	4	3
Y(24)	4	4	4	2	4	3	4	4	4	4	1	4	4	4	1		Z(24)	121.99	372.19	193.59	258.44	100.99	51.61	119.39	256.59	149.19	483.39	186.55	465.39	257.39	231.59	648.9			Y(24)	4	4	1	2	2	2	3	4	4	4	1	4	4	4
Y(25)	4	4	4	2	4	1	4	4	4	4	3	1	4	4	3		Z(25)	122.79	393.19	214.39	261.46	112.39	53.48	121.39	257.79	152.39	484.79	186.66	484.38	262.79	243.19	649.01			Y(25)	1	4	3	2	2	4	4	4	4	4	3	4	4	1
Y(26)	1	4	2	2	4	3	4	4	4	4	1	3	4	4	4		Z(26)	125.07	444.39	232.77	261.58	114.59	53.59	132.39	261.79	156.39	494.39	187.86	484.49	269.19	260.19	652.99			Y(26)	3	4	1	2	2	4	4	2	1	4	4	1	4	3
Y(27)	3	2	2	2	4	1	1	4	1	4	3	4	4	4	4		Z(27)	125.18	449.63	233.68	262.44	117.79	55.94	148.17	263.59	157.62	494.79	187.97	488.79	270.39	268.79	660.59			Y(27)	1	4	3	1	2	4	4	2	3	4	1	3	4	1
Y(28)	4	2	2	2	2	3	3	4	3	4	4	4	4	4	4		Z(28)	128.59	452.3	269.64	262.67	122.36	56.05	148.28	264.19	157.73	495.39	192.39	520.39	300.99	277.39	708.19			Y(28)	3	2	4	3	2	2	1	1	4	4	3	1	4	3
Y(29)	4	2	2	2	4	1	4	4	4	4	4	4	4	2	4		Z(29)	143.19	454.11	271.07	262.96	124.79	57.05	154.79	269.39	159.39	498.19	198.39	527.59	301.99	284.97	710.19			Y(29)	4	2	4	1	1	2	3	3	4	2	4	3	4	4
Y(30)	4	2	2	2	4	3	4	4	4	4	4	4	4	4	4		Z(30)	145.59	456.48	272.49	263.08	127.19	57.16	165.99	271.99	167.79	501.19	207.59	530.99	304.99	289.59	713.79			Y(30)	4	2	1	3	3	2	1	4	4	2	4	1	4	4
Y(31)	4	4	2	2	4	4	4	4	4	4	4	4	4	4	2		Z(31)	145.99	465.79	279.55	266.11	132.19	62.59	171.99	273.79	170.39	506.79	216.39	533.39	323.19	302.19	725.59			Y(31)	4	2	3	4	4	2	3	4	1	2	1	3	4	4
Y(32)	4	2	2	2	4	4	2	4	4	4	4	4	4	4	4		Z(32)	147.59	486.08	281.48	269.11	132.99	68.59	225.74	274.39	174.99	534.19	219.19	539.79	343.19	306.79	741.79			Y(32)	1	2	4	4	4	4	4	4	3	2	3	4	4	4
Y(33)	4	2	2	2	4	4	4	4	1	4	4	1	4	4	4		Z(33)	149.59	488.24	286.51	270.39	136.99	80.19	241.39	277.39	178.49	578.79	223.19	543.63	347.19	307.39	760.59			Y(33)	3	2	1	4	1	4	4	4	4	4	4	4	4	2
Y(34)	4	4	4	2	4	4	4	4	3	4	4	3	2	4	1		Z(34)	164.59	512.39	290.19	272.6	144.19	90.19	244.79	280.99	178.6	707.59	228.79	543.74	352.16	310.19	777.43			Y(34)	4	2	3	4	3	4	4	4	4	4	1	4	4	2
Y(35)	4	1	4	2	4	4	4	4	4	4	4	4	2	4	3		Z(35)	180.39	517.14	300.79	273.11	152.19	105.99	261.99	284.99	180.79	719.19	231.79	554.19	355.19	310.79	777.54			Y(35)	1	2	4	4	4	4	4	4	4	4	3	4	4	2
Y(36)	1	3	4	2	4	4	4	4	4	4	4	4	2	1	1		Z(36)	224.3	517.25	305.19	274.22	154.99	108.99	262.99	291.39	184.99	746.79	307.39	578.99	355.37	312.06	781.38			Y(36)	3	2	4	4	4	4	2	4	1	1	4	4	4	2
Y(37)	3	4	2	2	2	4	1	4	4	4	4	4	2	3	3		Z(37)	224.41	518.99	312.28	274.93	159.19	112.59	285.98	293.99	188.99	769.39	310.99	586.79	356.52	312.17	781.49			Y(37)	4	4	1	1	1	4	4	4	3	3	4	4	4	2
Y(38)	1	4	4	2	4	4	3	4	4	4	4	4	2	1	1		Z(38)	227.12	539.19	325.19	275.87	161.59	113.99	286.09	294.59	191.79	777.79	334.59	589.99	358.05	313.37	783.97			Y(38)	4	1	3	3	3	4	1	4	4	4	1	1	4	2
Y(39)	3	4	4	4	1	4	1	4	4	4	4	4	2	3	3		Z(39)	227.23	564.39	329.79	309.79	163.28	114.39	287.66	296.79	198.39	793.19	345.19	591.79	361.18	313.48	784.08			Y(39)	4	3	4	1	4	4	3	4	1	4	3	3	4	2
Y(40)	1	4	4	1	3	4	3	4	4	1	4	4	2	1	4		Z(40)	233.66	564.79	330.19	312.25	163.39	116.59	287.77	299.59	204.39	799.78	349.99	593.59	362.03	315.04	786.79			Y(40)	4	4	1	3	1	4	4	4	3	1	4	4	4	2
Y(41)	3	4	4	3	1	4	4	4	4	3	2	4	4	3	4		Z(41)	233.77	565.59	339.59	312.36	165	118.19	292.79	301.39	207.79	799.89	369.78	597.79	368.99	315.15	792.59			Y(41)	4	4	3	1	3	4	1	4	1	3	1	4	4	1
Y(42)	4	4	1	1	3	4	4	4	2	4	2	4	4	1	4		Z(42)	238.19	590.59	348.59	314.74	165.11	120.99	302.99	305.19	209.18	803.99	373.31	604.79	369.99	320.11	799.39			Y(42)	4	4	4	3	4	1	3	4	3	4	3	1	4	3
Y(43)	4	1	3	3	4	4	4	4	4	4	4	4	2	3	4		Z(43)	246.39	608.12	348.7	314.85	168.19	121.59	326.99	310.39	214.59	898.59	380.39	612.99	373.83	320.22	812.19			Y(43)	4	4	1	4	4	3	4	4	4	1	4	3	4	4
Y(44)	4	3	4	4	4	4	4	4	4	4	2	1	2	1	4		Z(44)	259.59	608.23	353.79	319.99	175.39	125.19	330.39	313.19	218.79	901.99	390.65	620.72	376.31	321.58	816.39			Y(44)	1	2	3	4	1	4	4	4	4	3	4	4	4	4
Y(45)	4	4	4	4	4	4	4	4	4	4	2	3	4	3	4		Z(45)	260.19	610.39	369.19	327.79	176.59	126.19	347.59	316.19	237.99	910.19	394.68	620.83	400.19	321.69	844.79			Y(45)	3	2	4	4	3	4	4	4	4	4	4	1	4	4
Y(46)	4	4	4	4	4	4	2	4	1	4	2	1	4	1	1		Z(46)	282.19	622.59	372.19	336.39	199.79	127.79	414.66	322.39	243.17	911.79	395.02	627.75	422.19	326.29	849.35			Y(46)	4	2	4	4	4	2	1	4	1	1	1	3	4	4
Y(47)	4	1	4	4	4	4	2	4	3	4	2	3	4	3	3		Z(47)	287.59	629.41	374.59	339.59	200.99	131.59	417.69	329.79	243.28	915.39	395.97	627.86	442.39	326.4	849.46			Y(47)	1	1	4	4	1	1	3	4	3	3	3	4	4	1
Y(48)	4	3	4	4	4	4	2	4	4	4	2	4	4	1	1		Z(48)	293.99	629.52	376.99	343.39	210.99	131.99	430.5	333.19	244.99	916.99	401.33	631.59	479.79	327.88	852.33			Y(48)	3	3	1	1	3	3	4	4	4	4	4	4	2	3
Y(49)	1	4	4	4	4	4	1	4	4	4	4	4	2	3	3		Z(49)	304.78	632.79	378.79	345.39	217.39	133.99	447.55	345.19	254.19	919.19	410.99	643.79	485.17	327.99	852.44			Y(49)	4	4	3	3	4	4	4	4	4	4	4	1	2	4
Y(50)	3	4	4	4	4	4	3	4	4	4	4	4	4	4	1		Z(50)	304.89	644.99	381.39	346.39	223.59	135.59	447.66	348.59	258.19	920.19	416.19	694.19	499.19	333.19	854.22			Y(50)	1	1	4	4	1	4	1	4	4	1	1	3	4	1
Y(51)	4	4	4	4	4	4	1	4	1	4	4	1	4	4	3		Z(51)	305.99	651.39	383.59	347.99	228.99	135.99	449.04	348.99	263.24	925.79	424.19	728.19	528.59	338.79	854.33			Y(51)	3	3	1	4	3	4	3	4	4	3	3	4	4	3
Y(52)	4	1	4	4	4	4	3	4	3	4	2	3	2	4	1		Z(52)	319.99	657.4	385.99	348.79	233.39	136.59	449.15	349.99	263.35	931.19	430.22	728.3	531.6	350.39	858.66			Y(52)	4	4	3	1	4	1	1	2	4	4	4	1	4	4
Y(53)	4	3	4	4	2	4	1	4	4	4	2	4	2	4	3		Z(53)	321.59	657.51	387.39	352.19	238.37	138.99	450.12	351.99	267.99	933.99	432.6	732.39	531.69	359.59	858.77			Y(53)	1	1	4	3	1	3	3	4	4	1	1	3	4	1
Y(54)	4	4	4	4	4	4	3	4	4	4	2	4	2	4	4		Z(54)	322.79	659.59	389.99	361.59	246.79	139.59	450.23	353.79	275.39	955.79	434.1	747.99	532.04	371.19	860.99			Y(54)	3	3	4	4	3	4	4	4	1	3	3	4	4	3
Y(55)	4	4	4	4	4	4	1	4	4	4	2	1	2	4	4		Z(55)	324.99	712.39	392.99	362.19	247.99	141.59	452.43	355.79	277.39	973.79	434.19	763.57	532.81	383.79	866.19			Y(55)	4	4	1	4	4	1	4	4	3	4	4	1	4	1
Y(56)	4	1	4	4	2	4	3	4	4	4	2	3	2	4	4		Z(56)	327.59	719	394.59	363.99	254.05	142.59	452.54	357.99	281.19	978.39	436.55	763.68	534.36	392.79	872.79			Y(56)	1	2	3	4	1	3	1	4	4	1	1	3	4	3
Y(57)	4	3	4	4	2	4	1	4	4	4	2	4	4	4	4		Z(57)	329.59	719.11	396.19	364.39	258.81	145.99	453.63	359.59	282.99	979.39	441.81	770.79	536.19	410.39	884.59			Y(57)	3	2	4	4	3	4	3	4	4	3	3	4	4	4
Y(58)	1	4	4	4	2	4	3	4	4	4	4	4	4	4	1		Z(58)	332.1	721.59	397.39	403.79	259.52	146.79	453.74	360.19	283.59	988.59	467.79	794.99	540.79	412.79	948.54			Y(58)	4	1	1	2	4	4	4	4	4	4	4	4	4	4
Y(59)	3	4	4	4	2	4	1	4	4	4	4	4	4	4	3		Z(59)	332.21	742.79	398.59	407.99	262.24	147.39	454.63	362.79	289.19	991.99	475.39	799.59	565.19	418.99	948.65			Y(59)	4	3	3	2	1	4	4	4	2	1	1	1	4	4
Y(60)	4	2	4	4	2	4	3	4	4	4	4	1	4	4	1		Z(60)	334.39	833.71	402.39	408.99	262.55	184.79	454.74	366.19	294.79	1100.19	485.59	818.02	579.99	421.19	949.68			Y(60)	1	4	4	2	3	4	1	4	2	3	3	3	4	1
Y(61)	4	2	4	4	2	4	1	4	4	4	1	3	4	4	3		Z(61)	342.59	834.57	406.99	414.19	264.6	192.99	456.5	367.39	298.19	1128.39	491.74	818.13	621.99	423.79	949.79			Y(61)	3	1	1	2	4	4	3	1	2	4	4	4	4	3
Y(62)	4	2	4	4	2	4	3	4	1	4	3	4	4	4	1		Z(62)	345.99	836	409.19	417.59	264.71	193.79	456.61	370.39	300.3	1131.99	491.85	821.19	635.99	433.19	951.91			Y(62)	4	3	3	1	1	4	1	3	2	1	1	1	4	4
Y(63)	4	2	4	1	2	4	4	4	3	4	4	4	4	4	3		Z(63)	346.39	841.75	416.59	435.85	265.27	194.39	459.99	371.39	300.41	1151.59	494.79	839.59	640.79	439.19	952.02			Y(63)	1	4	4	3	3	4	3	4	2	3	3	3	4	1
Y(64)	4	1	4	3	4	4	4	4	4	4	4	4	4	4	4		Z(64)	353.59	890.53	418.59	435.96	267.59	195.59	469.59	373.19	302.59	1159.79	501.19	843.79	642.99	455.39	954.19			Y(64)	3	1	1	4	1	4	4	4	1	4	4	4	4	3
Y(65)	1	3	4	4	2	4	4	4	4	4	4	1	4	4	4		Z(65)	360.22	890.64	420.59	450.79	269.21	195.99	482.39	391.99	309.19	1160.39	504.99	845.88	645.19	480.79	961.99			Y(65)	4	3	3	4	3	4	4	2	3	1	4	1	4	4
Y(66)	3	4	4	4	2	4	4	4	4	4	4	3	4	1	4		Z(66)	360.33	893.19	423.99	457.79	269.67	197.99	492.19	394.79	310.99	1196.59	508.79	845.99	648.99	484.88	973.39			Y(66)	1	4	4	1	4	1	1	2	4	3	4	3	4	1
Y(67)	4	1	4	4	2	4	4	4	4	4	4	1	4	3	2		Z(67)	362.79	912.09	424.39	460.79	269.82	198.59	501.19	398.59	312.79	1213.19	522.39	847.26	659.39	484.99	1010.92			Y(67)	3	1	4	3	4	3	3	4	2	4	4	4	1	3
Y(68)	4	3	4	4	2	4	4	4	4	4	4	3	4	4	4		Z(68)	370.99	912.2	454.19	462.99	270.03	199.99	511.19	401.39	317.99	1258.99	526.59	847.37	663.99	487.39	1020.99			Y(68)	4	3	1	1	1	1	4	4	2	1	1	4	3	4
Y(69)	4	1	4	4	2	1	4	4	4	4	4	1	4	4	1		Z(69)	372.99	914.98	465.59	466.19	272.41	202.12	523.39	403.59	318.59	1259.99	537.99	848.84	668.99	512.79	1023.29			Y(69)	1	4	3	3	3	3	1	4	2	3	3	1	1	1
Y(70)	4	3	4	4	2	3	4	2	4	4	4	3	4	4	3		Z(70)	374.59	915.09	484.79	467.19	272.51	202.23	539.19	411.86	320.79	1262.79	538.59	848.95	671.59	519.19	1023.4			Y(70)	3	4	0	4	4	4	3	4	4	4	0	3	3	3
Y(71)	4	1	2	4	2	1	4	2	4	4	1	4	4	4	1		Z(71)	377.39	917.62	550.02	469.39	276.92	203.85	540.59	412.65	321.39	1263.19	550.88	852.39	679.99	524.79	1025.17			Y(71)	0	1	0	4	1	4	1	2	4	1	0	4	1	4
Y(72)	4	3	2	4	4	3	4	2	4	4	3	4	4	4	3		Z(72)	379.39	917.73	555.45	469.79	286.99	203.96	545.59	414.13	325.99	1263.99	550.99	861.39	682.19	530.39	1025.28			Y(72)	0	3	0	4	3	4	3	2	2	3	0	4	3	1
Y(73)	1	4	4	4	4	1	1	2	2	2	1	4	4	4	1		Z(73)	380.57	921.59	563.99	472.39	298.19	211.43	632.31	415.67	328.27	1266.13	553.21	886.19	685.59	534.39	1026.26			Y(73)	0	4	0	4	0	4	0	2	2	4	0	1	4	3
Y(74)	3	4	4	4	4	3	3	4	4	2	3	4	4	4	3		Z(74)	380.68	933.39	572.99	473.19	361.79	211.54	632.42	435.39	335.39	1271.56	553.32	926.19	710.39	540.59	1026.37			Y(74)	0	1	0	4	0	4	0	4	2	1	0	3	4	4
Y(75)	4	4	4	4	1	1	1	4	4	2	4	1	4	4	1		Z(75)	383.39	947.39	574.19	478.59	373.48	215.06	634.13	437.19	335.99	1272.04	556.79	931.48	716.79	557.79	1027.33			Y(75)	0	3	0	4	0	4	0	4	1	3	0	0	4	4
Y(76)	4	2	4	4	3	3	3	4	1	2	4	3	4	4	3		Z(76)	392.59	978.43	576.19	492.79	373.59	215.17	634.24	437.99	337.9	1274.57	562.59	931.59	721.39	559.19	1027.44			Y(76)	0	1	0	4	0	4	0	4	3	4	0	0	4	1
Y(77)	4	1	4	4	1	1	4	4	3	4	4	4	4	4	1		Z(77)	396.39	1005.22	580.19	498.59	375.63	217.51	636.79	438.79	338.01	1303.79	583.99	934.19	726.99	568.19	1029.05			Y(77)	0	3	0	1	0	4	0	1	4	1	0	0	4	3
Y(78)	4	3	4	2	3	3	4	4	4	4	4	1	4	4	3		Z(78)	400.79	1005.33	580.79	502.19	375.74	217.62	647.39	480.19	339.79	1327.99	591.19	986.15	729.19	584.39	1029.16			Y(78)	0	4	0	3	0	1	0	3	4	3	0	0	4	4
Y(79)	4	4	1	2	4	1	4	4	4	2	1	3	4	1	1		Z(79)	404.99	1008.39	591.56	505.18	377.79	218.89	662.79	482.79	346.79	1349.75	605.24	986.26	735.59	614.49	1031.74			Y(79)	0	1	0	4	0	3	0	1	4	4	0	0	4	1
Y(80)	4	4	3	2	4	3	4	4	4	2	3	4	4	3	3		Z(80)	405.79	1072.19	591.67	518	393.79	219	663.99	483.99	348.39	1350.13	605.35	989.19	739.39	614.6	1031.85			Y(80)	0	3	0	1	0	4	0	3	1	1	0	0	4	3
Y(81)	4	1	1	2	4	4	4	4	4	2	4	2	4	1	0		Z(81)	413.59	1128.27	595.84	518.58	421.39	224.59	670.79	490.39	350.79	1350.26	608.39	1013.08	748.79	616.38	0			Y(81)	0	1	0	3	0	4	0	1	3	3	0	0	4	4
Y(82)	1	3	3	2	4	4	1	4	4	2	1	1	4	3	0		Z(82)	437.15	1128.38	595.95	521.48	422.79	232.79	673.11	493.19	355.19	1353.22	655.68	1018.15	775.19	616.49	0			Y(82)	0	3	0	4	0	1	0	3	4	4	0	0	4	1
Y(83)	3	4	4	4	4	4	3	4	1	2	3	3	4	4	0		Z(83)	437.26	1130.59	599.59	554.19	427.79	244.39	673.22	496.99	362.29	1353.45	655.79	1018.26	820.99	618.59	0			Y(83)	0	1	0	4	0	3	0	1	4	1	0	0	4	3
Y(84)	4	1	4	2	4	4	4	4	3	2	4	4	4	4	0		Z(84)	438.79	1156.34	616.19	559.99	432.39	255.19	675.99	497.59	362.4	1355.2	658.39	1021.39	840.59	626.39	0			Y(84)	0	3	0	4	0	4	0	3	1	3	0	0	4	4
Y(85)	4	3	4	2	4	4	4	4	4	1	2	4	4	4	0		Z(85)	448.79	1156.45	633.99	569.34	434.19	257.59	683.59	506.19	365.19	1363.32	689.32	1039.79	847.39	647.79	0			Y(85)	0	1	0	1	0	4	0	4	3	1	0	0	4	1
Y(86)	4	4	4	1	2	4	1	4	4	3	2	1	4	4	0		Z(86)	452.99	1159.59	643.39	586.03	440.91	267.39	698.16	516.99	373.79	1363.43	692.76	1048.38	855.19	652.79	0			Y(86)	0	3	0	3	0	1	0	4	4	3	0	0	2	3
Y(87)	4	1	4	3	2	4	3	4	4	4	2	3	4	4	0		Z(87)	460.39	1162.87	645.99	586.14	441.65	276.39	698.27	519.79	376.99	1365.79	694.76	1048.49	872.99	659.79	0			Y(87)	0	4	0	4	0	3	0	4	4	0	0	0	2	0
Y(88)	4	3	4	1	2	4	1	4	4	4	4	4	4	1	0		Z(88)	462.19	1162.98	647.19	591.07	442.19	288.79	700.11	521.19	379.39	1453.19	705.39	1052.19	882.99	666.04	0			Y(88)	0	4	0	1	0	4	0	4	4	0	0	0	2	0
Y(89)	4	1	4	3	4	4	3	4	4	4	1	2	4	3	0		Z(89)	471.39	1164.26	648.19	591.18	447.59	306.19	700.22	522.99	379.99	1475.59	718.96	1081.71	897.39	666.15	0			Y(89)	0	4	0	3	0	4	0	4	1	0	0	0	2	0
Y(90)	2	3	4	4	2	4	1	4	4	4	3	2	4	4	0		Z(90)	472.7	1164.37	651.99	601.99	451.59	310.19	701.64	525.79	381.59	1479.19	719.07	1086.3	900.39	668.19	0			Y(90)	0	4	0	4	0	4	0	4	3	0	0	0	4	0
Y(91)	2	1	4	4	4	4	3	4	4	4	4	2	4	4	0		Z(91)	478.35	1169.47	653.39	610.39	459.19	310.99	701.75	528.39	382.19	1485.59	722.39	1087.57	904.79	690.99	0			Y(91)	0	4	0	4	0	1	0	4	4	0	0	0	4	0
Y(92)	2	3	1	4	1	4	0	4	4	4	4	2	4	4	0		Z(92)	480.53	1169.58	658.06	622.39	471.26	313.59	0	530.59	384.59	1486.39	731.99	1093.32	908.19	695.19	0			Y(92)	0	4	0	2	0	3	0	4	4	0	0	0	4	0
Y(93)	2	0	3	4	3	4	0	4	4	4	4	2	4	1	0		Z(93)	481.68	0	658.17	625.19	471.37	314.79	0	536.19	386.59	1498.99	735.39	1093.5	912.99	699.12	0			Y(93)	0	4	0	2	0	4	0	4	4	0	0	0	4	0
Y(94)	2	0	4	4	4	4	0	4	4	4	1	2	2	3	0		Z(94)	488.63	0	660.59	628.79	473.19	317.59	0	537.79	387.19	1509.79	739.08	1098.7	941.72	699.23	0			Y(94)	0	1	0	2	0	4	0	4	4	0	0	0	4	0
Y(95)	4	0	4	4	4	4	0	4	4	4	3	1	4	1	0		Z(95)	490.99	0	741.59	629.19	500.19	319.39	0	538.59	387.59	1515.19	739.19	1113.94	971.19	701.2	0			Y(95)	0	3	0	2	0	4	0	4	1	0	0	0	1	0
Y(96)	4	0	4	4	4	4	0	4	4	4	1	3	4	3	0		Z(96)	491.39	0	752.79	631.19	503.19	321.19	0	542.59	388.79	1529.19	741.46	1114.05	988.79	701.31	0			Y(96)	0	0	0	2	0	4	0	4	3	0	0	0	3	0
Y(97)	1	0	1	4	4	4	0	4	1	4	3	4	4	4	0		Z(97)	493.88	0	764.32	633.39	505.19	341.79	0	545.59	392.74	1535.99	741.57	1117.19	994.19	703.39	0			Y(97)	0	0	0	2	0	1	0	4	4	0	0	0	1	0
Y(98)	3	0	3	4	4	4	0	4	3	4	4	4	2	4	0		Z(98)	493.99	0	764.43	637.39	510.19	345.39	0	550.39	392.85	1537.39	744.19	1137.79	1001.52	708.79	0			Y(98)	0	0	0	2	0	3	0	1	4	0	0	0	3	0
Y(99)	4	0	1	4	4	4	0	4	4	4	4	1	4	4	0		Z(99)	495.99	0	768.2	642.19	511.59	349.39	0	551.39	394.19	1541.19	749.99	1141.03	1024.19	721.19	0			Y(99)	0	0	0	2	0	4	0	3	4	0	0	0	4	0
Y(100)	4	0	3	4	4	4	0	4	4	1	4	3	4	4	0		Z(100)	505.99	0	768.31	650.19	512.39	351.39	0	555.79	399.59	1543.03	775.19	1141.14	1068.99	738.59	0			Y(100)	0	0	0	2	0	1	0	4	4	0	0	0	4	0
Y(101)	4	0	4	4	4	4	0	4	4	3	4	4	4	4	0		Z(101)	514.79	0	771.59	651.39	518.19	351.99	0	594.39	400.79	1543.14	788.99	1144.59	1098.19	741.39	0			Y(101)	0	0	0	2	0	3	0	4	2	0	0	0	4	0
Y(102)	4	0	4	4	2	4	0	4	4	4	1	1	2	1	0		Z(102)	519.19	0	782.39	654.19	521.76	354.19	0	601.59	405.59	1546.19	791.74	1157.84	1109.49	751.18	0			Y(102)	0	0	0	2	0	1	0	0	2	0	0	0	4	0
Y(103)	4	0	4	4	2	4	0	4	4	4	3	3	2	3	0		Z(103)	520.99	0	795.59	658.39	522.96	354.79	0	606.59	406.19	1599.19	791.85	1157.95	1125.75	751.29	0			Y(103)	0	0	0	2	0	3	0	0	2	0	0	0	4	0
Y(104)	2	0	4	4	4	4	0	4	4	4	4	4	1	4	0		Z(104)	526.18	0	796.59	663.19	532.19	355.19	0	614.79	406.59	1605.39	794.59	1161.39	1141.56	753.39	0			Y(104)	0	0	0	2	0	4	0	0	2	0	0	0	1	0
Y(105)	2	0	4	4	1	4	0	4	4	4	4	4	3	4	0		Z(105)	527.07	0	800.79	663.99	535.5	356.19	0	621.39	411.19	1613.39	805.79	1175.19	1141.67	767.79	0			Y(105)	0	0	0	2	0	4	0	0	4	0	0	0	3	0
Y(106)	2	0	4	4	3	4	0	4	1	4	2	4	4	1	0		Z(106)	528.07	0	802.99	664.79	535.61	361.19	0	624.79	416.13	1618.19	825.6	1175.79	1147.39	770.59	0			Y(106)	0	0	0	2	0	4	0	0	4	0	0	0	4	0
Y(107)	2	0	4	4	4	1	0	4	3	4	2	4	4	3	0		Z(107)	533.31	0	805.99	805.19	538.19	365	0	647.19	416.24	1625.79	828.71	1177.19	1168.79	770.7	0			Y(107)	0	0	0	1	0	1	0	0	4	0	0	0	4	0
Y(108)	1	0	4	4	4	3	0	4	4	4	2	1	4	4	0		Z(108)	539.03	0	808.99	805.99	566.79	365.11	0	653.39	417.99	1627.79	828.86	1179.7	1188.39	775.39	0			Y(108)	0	0	0	3	0	3	0	0	1	0	0	0	1	0
Y(109)	3	0	2	1	1	4	0	4	4	4	2	3	4	1	0		Z(109)	539.14	0	813.04	809.83	572.64	370.99	0	654.59	424.99	1629.99	830.11	1179.81	1191.19	794.15	0			Y(109)	0	0	0	4	0	4	0	0	3	0	0	0	3	0
Y(110)	4	0	4	3	3	4	0	4	4	4	1	0	4	3	0		Z(110)	541.39	0	818.79	809.94	572.75	390.59	0	690.99	427.59	1632.39	842.53	0	1193.79	794.26	0			Y(110)	0	0	0	2	0	4	0	0	4	0	0	0	1	0
Y(111)	4	0	4	1	4	4	0	4	4	4	3	0	4	1	0		Z(111)	552.39	0	827.79	811.04	574.99	391.59	0	693.99	431.39	1634.19	842.64	0	1197.99	796.3	0			Y(111)	0	0	0	2	0	4	0	0	4	0	0	0	3	0
Y(112)	1	0	2	3	4	4	0	4	1	4	1	0	4	3	0		Z(112)	556.22	0	834.14	811.15	595.79	392.99	0	694.79	438.22	1634.79	843.98	0	1204.19	796.41	0			Y(112)	0	0	0	2	0	4	0	0	1	0	0	0	1	0
Y(113)	3	0	4	4	4	4	0	4	3	4	3	0	4	1	0		Z(113)	556.33	0	841.59	817.99	597.39	396.39	0	695.19	438.33	1638.99	844.09	0	1208.19	797.29	0			Y(113)	0	0	0	1	0	4	0	0	3	0	0	0	3	0
Y(114)	4	0	1	4	2	4	0	4	4	4	1	0	4	3	0		Z(114)	558.39	0	846.94	825.79	627.66	396.99	0	703.99	439.59	1641.19	846.33	0	1210.79	797.4	0			Y(114)	0	0	0	3	0	4	0	0	0	0	0	0	4	0
Y(115)	1	0	3	4	2	4	0	4	4	4	3	0	4	0	0		Z(115)	573.97	0	847.05	834.39	627.77	399.99	0	707.79	446.99	1645.19	846.44	0	1215.19	0	0			Y(115)	0	0	0	4	0	2	0	0	0	0	0	0	4	0
Y(116)	3	0	1	4	2	4	0	4	1	4	1	0	4	0	0		Z(116)	574.08	0	848.3	836.59	627.96	400.99	0	710.59	452.35	1646.19	850.25	0	1219.59	0	0			Y(116)	0	0	0	4	0	4	0	0	0	0	0	0	4	0
Y(117)	1	0	3	4	2	4	0	4	3	4	3	0	4	0	0		Z(117)	575.11	0	848.41	840.79	628.96	401.59	0	722.19	452.46	1648.99	850.36	0	1225.99	0	0			Y(117)	0	0	0	1	0	1	0	0	0	0	0	0	4	0
Y(118)	3	0	4	4	2	4	0	4	4	4	4	0	4	0	0		Z(118)	575.22	0	850.99	854.79	631.97	407.59	0	723.79	454.39	1650.79	852.99	0	1228.59	0	0			Y(118)	0	0	0	3	0	3	0	0	0	0	0	0	4	0
Y(119)	4	0	4	4	2	4	0	4	4	4	4	0	4	0	0		Z(119)	576.59	0	863.99	855.19	634.4	407.99	0	727.99	463.79	1651.79	859.19	0	1295.99	0	0			Y(119)	0	0	0	0	0	4	0	0	0	0	0	0	4	0
Y(120)	4	0	4	4	2	4	0	4	1	4	4	0	4	0	0		Z(120)	584.79	0	886.99	858.19	638.68	412.19	0	730.19	493.02	1660.59	868.39	0	1296.39	0	0			Y(120)	0	0	0	0	0	1	0	0	0	0	0	0	4	0
Y(121)	4	0	4	4	2	1	0	4	3	4	4	0	4	0	0		Z(121)	585.79	0	891.39	858.99	640.85	414.17	0	732.59	493.13	1664.39	876.99	0	1340.19	0	0			Y(121)	0	0	0	0	0	3	0	0	0	0	0	0	4	0
Y(122)	4	0	4	4	2	3	0	4	4	4	4	0	4	0	0		Z(122)	612.99	0	896.79	862.59	646.63	414.28	0	735.19	495.19	1666.79	890.19	0	1369.79	0	0			Y(122)	0	0	0	0	0	4	0	0	0	0	0	0	4	0
Y(123)	1	0	4	4	2	4	0	4	4	4	4	0	4	0	0		Z(123)	615.46	0	899.19	863.59	652.61	417.39	0	739.39	501.59	1670.39	893.39	0	1372.99	0	0			Y(123)	0	0	0	0	0	4	0	0	0	0	0	0	4	0
Y(124)	3	0	1	4	4	4	0	4	4	4	1	0	4	0	0		Z(124)	615.57	0	905.26	864.39	659.99	431.99	0	745.39	508.39	1670.99	899.15	0	1413.59	0	0			Y(124)	0	0	0	0	0	1	0	0	0	0	0	0	4	0
Y(125)	4	0	3	2	2	4	0	4	1	4	3	0	4	0	0		Z(125)	617.59	0	905.37	874.84	663.47	434.39	0	773.19	511.51	1673.79	899.26	0	1468.99	0	0			Y(125)	0	0	0	0	0	3	0	0	0	0	0	0	4	0
Y(126)	4	0	1	2	2	4	0	4	3	4	0	0	2	0	0		Z(126)	627.39	0	906.55	876.11	663.95	448.59	0	799.59	511.62	1676.99	0	0	1498.61	0	0			Y(126)	0	0	0	0	0	0	0	0	0	0	0	0	4	0
Y(127)	4	0	3	2	2	2	0	4	4	4	0	0	2	0	0		Z(127)	634.39	0	906.66	876.58	667.37	452.7	0	805.59	513.59	1681.59	0	0	1498.86	0	0			Y(127)	0	0	0	0	0	0	0	0	0	0	0	0	4	0
Y(128)	4	0	4	2	2	2	0	4	1	4	0	0	2	0	0		Z(128)	635.39	0	908.79	876.71	667.45	453	0	806.39	539.98	1682.59	0	0	1500.01	0	0			Y(128)	0	0	0	0	0	0	0	0	0	0	0	0	4	0
Y(129)	4	0	4	2	4	4	0	4	3	4	0	0	2	0	0		Z(129)	637.79	0	921.59	876.86	677.19	454.59	0	807.99	540.09	1683.99	0	0	1500.06	0	0			Y(129)	0	0	0	0	0	0	0	0	0	0	0	0	4	0
Y(130)	1	0	4	2	1	4	0	4	4	4	0	0	2	0	0		Z(130)	639.28	0	932.99	877.02	677.89	455.19	0	810.59	541.39	1684.79	0	0	1501.09	0	0			Y(130)	0	0	0	0	0	0	0	0	0	0	0	0	4	0
Y(131)	3	0	4	2	3	4	0	4	4	1	0	0	2	0	0		Z(131)	639.39	0	939.59	877.2	678	458.99	0	824.79	548.39	1687.21	0	0	1501.3	0	0			Y(131)	0	0	0	0	0	0	0	0	0	0	0	0	4	0
Y(132)	4	0	4	2	4	4	0	4	1	3	0	0	2	0	0		Z(132)	642.59	0	946.39	879.7	681.59	459.39	0	828.19	551.24	1687.32	0	0	1503.09	0	0			Y(132)	0	0	0	0	0	0	0	0	0	0	0	0	1	0
Y(133)	4	0	1	1	1	4	0	4	3	1	0	0	2	0	0		Z(133)	652.99	0	947.75	891.8	711.45	472.99	0	832.59	551.35	1690.54	0	0	1505.34	0	0			Y(133)	0	0	0	0	0	0	0	0	0	0	0	0	3	0
Y(134)	1	0	3	3	3	4	0	4	4	3	0	0	4	0	0		Z(134)	658.95	0	947.86	891.91	711.56	476.59	0	834.39	553.79	1690.65	0	0	1509.39	0	0			Y(134)	0	0	0	0	0	0	0	0	0	0	0	0	1	0
Y(135)	3	0	1	1	4	4	0	4	4	4	0	0	2	0	0		Z(135)	659.06	0	950.3	893.51	713.39	501.79	0	837.59	561.39	1693.99	0	0	1512.91	0	0			Y(135)	0	0	0	0	0	0	0	0	0	0	0	0	3	0
Y(136)	4	0	3	3	4	4	0	4	4	4	0	0	2	0	0		Z(136)	660.99	0	950.41	893.62	725.39	512.19	0	843.79	562.99	1703.79	0	0	1513.5	0	0			Y(136)	0	0	0	0	0	0	0	0	0	0	0	0	4	0
Y(137)	4	0	4	4	1	4	0	4	1	4	0	0	4	0	0		Z(137)	671.79	0	954.19	896.99	726.34	514.39	0	844.79	571.33	1727.19	0	0	1527.39	0	0			Y(137)	0	0	0	0	0	0	0	0	0	0	0	0	4	0
Y(138)	1	0	4	4	3	4	0	1	3	0	0	0	4	0	0		Z(138)	676.57	0	965.79	902.59	726.45	515.99	0	850.89	571.44	0	0	0	1528.99	0	0			Y(138)	0	0	0	0	0	0	0	0	0	0	0	0	4	0
Y(139)	3	0	4	4	4	4	0	3	4	0	0	0	2	0	0		Z(139)	676.68	0	994.99	947.99	728.39	521.19	0	851	573.59	0	0	0	1559.59	0	0			Y(139)	0	0	0	0	0	0	0	0	0	0	0	0	4	0
Y(140)	4	0	4	4	1	4	0	1	4	0	0	0	1	0	0		Z(140)	679.79	0	997.99	948.79	749.33	521.79	0	854.13	581.39	0	0	0	1605.37	0	0			Y(140)	0	0	0	0	0	0	0	0	0	0	0	0	4	0
Y(141)	4	0	1	4	3	2	0	3	4	0	0	0	3	0	0		Z(141)	691.39	0	999.13	954.39	749.44	525.32	0	854.24	586.99	0	0	0	1605.48	0	0			Y(141)	0	0	0	0	0	0	0	0	0	0	0	0	4	0
Y(142)	4	0	3	4	4	2	0	4	4	0	0	0	4	0	0		Z(142)	693.19	0	999.24	959.99	751.99	526.52	0	869.79	591.99	0	0	0	1610.59	0	0			Y(142)	0	0	0	0	0	0	0	0	0	0	0	0	4	0
Y(143)	1	0	1	2	4	2	0	4	4	0	0	0	4	0	0		Z(143)	699.89	0	1001.84	990.48	770.59	526.87	0	878.99	606.99	0	0	0	1657.19	0	0			Y(143)	0	0	0	0	0	0	0	0	0	0	0	0	4	0
Y(144)	3	0	3	1	4	2	0	4	4	0	0	0	4	0	0		Z(144)	700	0	1001.95	1078.43	771.19	527.02	0	896.59	621.39	0	0	0	1670.39	0	0			Y(144)	0	0	0	0	0	0	0	0	0	0	0	0	4	0
Y(145)	0	0	4	3	2	2	0	4	4	0	0	0	4	0	0		Z(145)	0	0	1005.39	1078.54	773.83	527.25	0	899.39	697.79	0	0	0	1673.59	0	0			Y(145)	0	0	0	0	0	0	0	0	0	0	0	0	4	0
Y(146)	0	0	4	4	2	4	0	4	2	0	0	0	4	0	0		Z(146)	0	0	1018.79	1082.99	773.96	528.39	0	900.79	699.15	0	0	0	1675.19	0	0			Y(146)	0	0	0	0	0	0	0	0	0	0	0	0	2	0
Y(147)	0	0	1	4	2	4	0	4	2	0	0	0	4	0	0		Z(147)	0	0	1049.81	1091.59	774.18	528.99	0	903.19	699.32	0	0	0	1677.39	0	0			Y(147)	0	0	0	0	0	0	0	0	0	0	0	0	2	0
Y(148)	0	0	3	4	4	2	0	4	1	0	0	0	1	0	0		Z(148)	0	0	1049.92	1099.39	777.19	534.39	0	906.19	721.24	0	0	0	1681.78	0	0			Y(148)	0	0	0	0	0	0	0	0	0	0	0	0	4	0
Y(149)	0	0	4	4	1	2	0	4	3	0	0	0	3	0	0		Z(149)	0	0	1051.99	1103.19	779.16	536.05	0	908.59	721.35	0	0	0	1681.89	0	0			Y(149)	0	0	0	0	0	0	0	0	0	0	0	0	4	0
Y(150)	0	0	1	4	3	2	0	4	4	0	0	0	4	0	0		Z(150)	0	0	1075.14	1113.99	779.27	536.9	0	912.19	724.39	0	0	0	1695.59	0	0			Y(150)	0	0	0	0	0	0	0	0	0	0	0	0	2	0
Y(151)	0	0	3	4	4	2	0	4	4	0	0	0	4	0	0		Z(151)	0	0	1075.25	1127.59	781.19	537.01	0	928.19	733.79	0	0	0	1718.19	0	0			Y(151)	0	0	0	0	0	0	0	0	0	0	0	0	2	0
Y(152)	0	0	4	1	2	2	0	4	4	0	0	0	4	0	0		Z(152)	0	0	1077.79	1153.28	797.63	537.08	0	931.59	735.39	0	0	0	1719.19	0	0			Y(152)	0	0	0	0	0	0	0	0	0	0	0	0	2	0
Y(153)	0	0	4	3	2	2	0	4	4	0	0	0	4	0	0		Z(153)	0	0	1099.19	1153.39	801.43	537.14	0	934.39	737.59	0	0	0	1735.19	0	0			Y(153)	0	0	0	0	0	0	0	0	0	0	0	0	2	0
Y(154)	0	0	1	1	2	2	0	4	4	0	0	0	4	0	0		Z(154)	0	0	1100.54	1154.34	801.49	537.66	0	936.79	740.59	0	0	0	1754.99	0	0			Y(154)	0	0	0	0	0	0	0	0	0	0	0	0	2	0
Y(155)	0	0	3	3	1	2	0	4	4	0	0	0	4	0	0		Z(155)	0	0	1100.65	1154.45	805.59	541.19	0	939.39	766.79	0	0	0	1784.79	0	0			Y(155)	0	0	0	0	0	0	0	0	0	0	0	0	2	0
Y(156)	0	0	4	1	3	4	0	4	4	0	0	0	4	0	0		Z(156)	0	0	1102.99	1157.8	805.7	543.79	0	941.99	776.99	0	0	0	1796.39	0	0			Y(156)	0	0	0	0	0	0	0	0	0	0	0	0	2	0
Y(157)	0	0	1	3	4	4	0	4	1	0	0	0	4	0	0		Z(157)	0	0	1125.31	1157.91	807.39	544.59	0	946.19	780.47	0	0	0	1797.19	0	0			Y(157)	0	0	0	0	0	0	0	0	0	0	0	0	2	0
Y(158)	0	0	3	1	4	4	0	4	3	0	0	0	0	0	0		Z(158)	0	0	1125.42	1160.41	818.59	545.19	0	947.39	780.58	0	0	0	0	0	0			Y(158)	0	0	0	0	0	0	0	0	0	0	0	0	2	0
Y(159)	0	0	4	3	4	4	0	4	4	0	0	0	0	0	0		Z(159)	0	0	1127.79	1160.52	820.59	545.99	0	949.39	782.39	0	0	0	0	0	0			Y(159)	0	0	0	0	0	0	0	0	0	0	0	0	2	0
Y(160)	0	0	4	1	1	4	0	4	4	0	0	0	0	0	0		Z(160)	0	0	1140.19	1163.28	823.88	549.19	0	958.19	791.59	0	0	0	0	0	0			Y(160)	0	0	0	0	0	0	0	0	0	0	0	0	1	0
Y(161)	0	0	1	3	3	4	0	4	4	0	0	0	0	0	0		Z(161)	0	0	1147.27	1163.39	823.99	549.79	0	961.59	793.39	0	0	0	0	0	0			Y(161)	0	0	0	0	0	0	0	0	0	0	0	0	3	0
Y(162)	0	0	3	4	4	4	0	4	4	0	0	0	0	0	0		Z(162)	0	0	1147.38	1168.59	826.39	550.19	0	963.19	798.79	0	0	0	0	0	0			Y(162)	0	0	0	0	0	0	0	0	0	0	0	0	4	0
Y(163)	0	0	0	4	2	4	0	4	4	0	0	0	0	0	0		Z(163)	0	0	0	1176.99	840.62	554.59	0	963.79	802.39	0	0	0	0	0	0			Y(163)	0	0	0	0	0	0	0	0	0	0	0	0	4	0
Y(164)	0	0	0	4	1	4	0	4	1	0	0	0	0	0	0		Z(164)	0	0	0	1184.59	845.28	554.99	0	967.79	807.98	0	0	0	0	0	0			Y(164)	0	0	0	0	0	0	0	0	0	0	0	0	4	0
Y(165)	0	0	0	4	3	4	0	4	3	0	0	0	0	0	0		Z(165)	0	0	0	1191.39	845.39	555.99	0	969.99	808.09	0	0	0	0	0	0			Y(165)	0	0	0	0	0	0	0	0	0	0	0	0	1	0
Y(166)	0	0	0	4	4	1	0	4	0	0	0	0	0	0	0		Z(166)	0	0	0	1202.19	846.79	563.02	0	971.79	0	0	0	0	0	0	0			Y(166)	0	0	0	0	0	0	0	0	0	0	0	0	3	0
Y(167)	0	0	0	4	4	3	0	4	0	0	0	0	0	0	0		Z(167)	0	0	0	1234.19	859.59	563.13	0	975.19	0	0	0	0	0	0	0			Y(167)	0	0	0	0	0	0	0	0	0	0	0	0	4	0
Y(168)	0	0	0	1	2	1	0	4	0	0	0	0	0	0	0		Z(168)	0	0	0	1288.99	861.86	564.52	0	977.79	0	0	0	0	0	0	0			Y(168)	0	0	0	0	0	0	0	0	0	0	0	0	4	0
Y(169)	0	0	0	3	4	3	0	4	0	0	0	0	0	0	0		Z(169)	0	0	0	1289.1	866.59	564.63	0	980.39	0	0	0	0	0	0	0			Y(169)	0	0	0	0	0	0	0	0	0	0	0	0	4	0
Y(170)	0	0	0	1	1	4	0	4	0	0	0	0	0	0	0		Z(170)	0	0	0	1291.32	867.81	569.99	0	987.19	0	0	0	0	0	0	0			Y(170)	0	0	0	0	0	0	0	0	0	0	0	0	4	0
Y(171)	0	0	0	3	3	4	0	4	0	0	0	0	0	0	0		Z(171)	0	0	0	1291.43	867.92	576.99	0	988.39	0	0	0	0	0	0	0			Y(171)	0	0	0	0	0	0	0	0	0	0	0	0	2	0
Y(172)	0	0	0	0	0	4	0	4	0	0	0	0	0	0	0		Z(172)	0	0	0	0	0	598.39	0	989.79	0	0	0	0	0	0	0			Y(172)	0	0	0	0	0	0	0	0	0	0	0	0	2	0
Y(173)	0	0	0	0	0	4	0	4	0	0	0	0	0	0	0		Z(173)	0	0	0	0	0	599.39	0	1000.59	0	0	0	0	0	0	0			Y(173)	0	0	0	0	0	0	0	0	0	0	0	0	2	0
Y(174)	0	0	0	0	0	4	0	4	0	0	0	0	0	0	0		Z(174)	0	0	0	0	0	602.79	0	1003.59	0	0	0	0	0	0	0			Y(174)	0	0	0	0	0	0	0	0	0	0	0	0	2	0
Y(175)	0	0	0	0	0	4	0	4	0	0	0	0	0	0	0		Z(175)	0	0	0	0	0	603.59	0	1005.19	0	0	0	0	0	0	0			Y(175)	0	0	0	0	0	0	0	0	0	0	0	0	2	0
Y(176)	0	0	0	0	0	4	0	4	0	0	0	0	0	0	0		Z(176)	0	0	0	0	0	604.39	0	1028.39	0	0	0	0	0	0	0			Y(176)	0	0	0	0	0	0	0	0	0	0	0	0	2	0
Y(177)	0	0	0	0	0	4	0	4	0	0	0	0	0	0	0		Z(177)	0	0	0	0	0	605.79	0	1031.19	0	0	0	0	0	0	0			Y(177)	0	0	0	0	0	0	0	0	0	0	0	0	2	0
Y(178)	0	0	0	0	0	4	0	4	0	0	0	0	0	0	0		Z(178)	0	0	0	0	0	607.39	0	1033.79	0	0	0	0	0	0	0			Y(178)	0	0	0	0	0	0	0	0	0	0	0	0	2	0
Y(179)	0	0	0	0	0	4	0	4	0	0	0	0	0	0	0		Z(179)	0	0	0	0	0	610.59	0	1038.59	0	0	0	0	0	0	0			Y(179)	0	0	0	0	0	0	0	0	0	0	0	0	4	0
Y(180)	0	0	0	0	0	4	0	4	0	0	0	0	0	0	0		Z(180)	0	0	0	0	0	611.19	0	1041.39	0	0	0	0	0	0	0			Y(180)	0	0	0	0	0	0	0	0	0	0	0	0	4	0
Y(181)	0	0	0	0	0	4	0	4	0	0	0	0	0	0	0		Z(181)	0	0	0	0	0	611.59	0	1044.99	0	0	0	0	0	0	0			Y(181)	0	0	0	0	0	0	0	0	0	0	0	0	1	0
Y(182)	0	0	0	0	0	1	0	4	0	0	0	0	0	0	0		Z(182)	0	0	0	0	0	618.96	0	1052.59	0	0	0	0	0	0	0			Y(182)	0	0	0	0	0	0	0	0	0	0	0	0	3	0
Y(183)	0	0	0	0	0	3	0	4	0	0	0	0	0	0	0		Z(183)	0	0	0	0	0	619.07	0	1053.39	0	0	0	0	0	0	0			Y(183)	0	0	0	0	0	0	0	0	0	0	0	0	4	0
Y(184)	0	0	0	0	0	4	0	4	0	0	0	0	0	0	0		Z(184)	0	0	0	0	0	621.39	0	1054.39	0	0	0	0	0	0	0			Y(184)	0	0	0	0	0	0	0	0	0	0	0	0	4	0
Y(185)	0	0	0	0	0	4	0	4	0	0	0	0	0	0	0		Z(185)	0	0	0	0	0	633.19	0	1059.59	0	0	0	0	0	0	0			Y(185)	0	0	0	0	0	0	0	0	0	0	0	0	4	0
Y(186)	0	0	0	0	0	4	0	4	0	0	0	0	0	0	0		Z(186)	0	0	0	0	0	635.99	0	1061.59	0	0	0	0	0	0	0			Y(186)	0	0	0	0	0	0	0	0	0	0	0	0	4	0
Y(187)	0	0	0	0	0	4	0	4	0	0	0	0	0	0	0		Z(187)	0	0	0	0	0	636.79	0	1067.19	0	0	0	0	0	0	0			Y(187)	0	0	0	0	0	0	0	0	0	0	0	0	1	0
Y(188)	0	0	0	0	0	4	0	4	0	0	0	0	0	0	0		Z(188)	0	0	0	0	0	640.39	0	1098.99	0	0	0	0	0	0	0			Y(188)	0	0	0	0	0	0	0	0	0	0	0	0	3	0
Y(189)	0	0	0	0	0	4	0	4	0	0	0	0	0	0	0		Z(189)	0	0	0	0	0	640.99	0	1113.59	0	0	0	0	0	0	0			Y(189)	0	0	0	0	0	0	0	0	0	0	0	0	4	0
Y(190)	0	0	0	0	0	4	0	4	0	0	0	0	0	0	0		Z(190)	0	0	0	0	0	641.39	0	1114.79	0	0	0	0	0	0	0			Y(190)	0	0	0	0	0	0	0	0	0	0	0	0	4	0
Y(191)	0	0	0	0	0	4	0	4	0	0	0	0	0	0	0		Z(191)	0	0	0	0	0	653.59	0	1154.39	0	0	0	0	0	0	0			Y(191)	0	0	0	0	0	0	0	0	0	0	0	0	4	0
Y(192)	0	0	0	0	0	4	0	4	0	0	0	0	0	0	0		Z(192)	0	0	0	0	0	658.79	0	1178.99	0	0	0	0	0	0	0			Y(192)	0	0	0	0	0	0	0	0	0	0	0	0	2	0
Y(193)	0	0	0	0	0	4	0	4	0	0	0	0	0	0	0		Z(193)	0	0	0	0	0	660.99	0	1187.59	0	0	0	0	0	0	0			Y(193)	0	0	0	0	0	0	0	0	0	0	0	0	1	0
Y(194)	0	0	0	0	0	4	0	4	0	0	0	0	0	0	0		Z(194)	0	0	0	0	0	664.59	0	1188.99	0	0	0	0	0	0	0			Y(194)	0	0	0	0	0	0	0	0	0	0	0	0	3	0
Y(195)	0	0	0	0	0	4	0	4	0	0	0	0	0	0	0		Z(195)	0	0	0	0	0	665.19	0	1209.39	0	0	0	0	0	0	0			Y(195)	0	0	0	0	0	0	0	0	0	0	0	0	4	0
Y(196)	0	0	0	0	0	4	0	4	0	0	0	0	0	0	0		Z(196)	0	0	0	0	0	674.79	0	1211.79	0	0	0	0	0	0	0			Y(196)	0	0	0	0	0	0	0	0	0	0	0	0	4	0
Y(197)	0	0	0	0	0	4	0	4	0	0	0	0	0	0	0		Z(197)	0	0	0	0	0	683.99	0	1215.79	0	0	0	0	0	0	0			Y(197)	0	0	0	0	0	0	0	0	0	0	0	0	4	0
Y(198)	0	0	0	0	0	4	0	4	0	0	0	0	0	0	0		Z(198)	0	0	0	0	0	684.79	0	1217.99	0	0	0	0	0	0	0			Y(198)	0	0	0	0	0	0	0	0	0	0	0	0	1	0
Y(199)	0	0	0	0	0	2	0	4	0	0	0	0	0	0	0		Z(199)	0	0	0	0	0	692.83	0	1228.79	0	0	0	0	0	0	0			Y(199)	0	0	0	0	0	0	0	0	0	0	0	0	3	0
Y(200)	0	0	0	0	0	2	0	4	0	0	0	0	0	0	0		Z(200)	0	0	0	0	0	693.25	0	1231.59	0	0	0	0	0	0	0
Y(201)	0	0	0	0	0	2	0	4	0	0	0	0	0	0	0		Z(201)	0	0	0	0	0	696.67	0	1253.99	0	0	0	0	0	0	0
Y(202)	0	0	0	0	0	4	0	4	0	0	0	0	0	0	0		Z(202)	0	0	0	0	0	698.39	0	1257.99	0	0	0	0	0	0	0
Y(203)	0	0	0	0	0	4	0	4	0	0	0	0	0	0	0		Z(203)	0	0	0	0	0	702.79	0	1260.99	0	0	0	0	0	0	0
Y(204)	0	0	0	0	0	4	0	4	0	0	0	0	0	0	0		Z(204)	0	0	0	0	0	703.19	0	1263.39	0	0	0	0	0	0	0
Y(205)	0	0	0	0	0	4	0	4	0	0	0	0	0	0	0		Z(205)	0	0	0	0	0	707.59	0	1268.79	0	0	0	0	0	0	0
Y(206)	0	0	0	0	0	4	0	4	0	0	0	0	0	0	0		Z(206)	0	0	0	0	0	710.59	0	1277.39	0	0	0	0	0	0	0
Y(207)	0	0	0	0	0	4	0	4	0	0	0	0	0	0	0		Z(207)	0	0	0	0	0	711.19	0	1282.59	0	0	0	0	0	0	0
Y(208)	0	0	0	0	0	2	0	4	0	0	0	0	0	0	0		Z(208)	0	0	0	0	0	714.28	0	1290.79	0	0	0	0	0	0	0
Y(209)	0	0	0	0	0	2	0	4	0	0	0	0	0	0	0		Z(209)	0	0	0	0	0	714.52	0	1291.39	0	0	0	0	0	0	0
Y(210)	0	0	0	0	0	2	0	4	0	0	0	0	0	0	0		Z(210)	0	0	0	0	0	714.86	0	1295.39	0	0	0	0	0	0	0
Y(211)	0	0	0	0	0	4	0	4	0	0	0	0	0	0	0		Z(211)	0	0	0	0	0	716.79	0	1316.79	0	0	0	0	0	0	0
Y(212)	0	0	0	0	0	4	0	4	0	0	0	0	0	0	0		Z(212)	0	0	0	0	0	728.99	0	1320.79	0	0	0	0	0	0	0
Y(213)	0	0	0	0	0	1	0	4	0	0	0	0	0	0	0		Z(213)	0	0	0	0	0	729.96	0	1324.59	0	0	0	0	0	0	0
Y(214)	0	0	0	0	0	3	0	2	0	0	0	0	0	0	0		Z(214)	0	0	0	0	0	730.07	0	1341.06	0	0	0	0	0	0	0
Y(215)	0	0	0	0	0	4	0	2	0	0	0	0	0	0	0		Z(215)	0	0	0	0	0	734.19	0	1343.98	0	0	0	0	0	0	0
Y(216)	0	0	0	0	0	4	0	2	0	0	0	0	0	0	0		Z(216)	0	0	0	0	0	744.59	0	1345.9	0	0	0	0	0	0	0
Y(217)	0	0	0	0	0	4	0	4	0	0	0	0	0	0	0		Z(217)	0	0	0	0	0	751.59	0	1381.19	0	0	0	0	0	0	0
Y(218)	0	0	0	0	0	4	0	4	0	0	0	0	0	0	0		Z(218)	0	0	0	0	0	754.39	0	1397.79	0	0	0	0	0	0	0
Y(219)	0	0	0	0	0	4	0	4	0	0	0	0	0	0	0		Z(219)	0	0	0	0	0	754.99	0	1406.99	0	0	0	0	0	0	0
Y(220)	0	0	0	0	0	4	0	4	0	0	0	0	0	0	0		Z(220)	0	0	0	0	0	759.39	0	1411.79	0	0	0	0	0	0	0
Y(221)	0	0	0	0	0	4	0	4	0	0	0	0	0	0	0		Z(221)	0	0	0	0	0	759.79	0	1418.19	0	0	0	0	0	0	0
Y(222)	0	0	0	0	0	4	0	4	0	0	0	0	0	0	0		Z(222)	0	0	0	0	0	764.59	0	1419.19	0	0	0	0	0	0	0
Y(223)	0	0	0	0	0	4	0	4	0	0	0	0	0	0	0		Z(223)	0	0	0	0	0	765.39	0	1422.19	0	0	0	0	0	0	0
Y(224)	0	0	0	0	0	4	0	4	0	0	0	0	0	0	0		Z(224)	0	0	0	0	0	765.79	0	1424.79	0	0	0	0	0	0	0
Y(225)	0	0	0	0	0	1	0	4	0	0	0	0	0	0	0		Z(225)	0	0	0	0	0	776.98	0	1427.19	0	0	0	0	0	0	0
Y(226)	0	0	0	0	0	3	0	4	0	0	0	0	0	0	0		Z(226)	0	0	0	0	0	777.09	0	1431.79	0	0	0	0	0	0	0
Y(227)	0	0	0	0	0	4	0	4	0	0	0	0	0	0	0		Z(227)	0	0	0	0	0	781.19	0	1432.19	0	0	0	0	0	0	0
Y(228)	0	0	0	0	0	4	0	4	0	0	0	0	0	0	0		Z(228)	0	0	0	0	0	788.99	0	1514.39	0	0	0	0	0	0	0
Y(229)	0	0	0	0	0	4	0	4	0	0	0	0	0	0	0		Z(229)	0	0	0	0	0	803.39	0	1522.79	0	0	0	0	0	0	0
Y(230)	0	0	0	0	0	4	0	4	0	0	0	0	0	0	0		Z(230)	0	0	0	0	0	804.99	0	1545.79	0	0	0	0	0	0	0
Y(231)	0	0	0	0	0	4	0	4	0	0	0	0	0	0	0		Z(231)	0	0	0	0	0	805.99	0	1547.19	0	0	0	0	0	0	0
Y(232)	0	0	0	0	0	4	0	4	0	0	0	0	0	0	0		Z(232)	0	0	0	0	0	853.39	0	1550.79	0	0	0	0	0	0	0
Y(233)	0	0	0	0	0	4	0	4	0	0	0	0	0	0	0		Z(233)	0	0	0	0	0	897.19	0	1634.99	0	0	0	0	0	0	0
Y(234)	0	0	0	0	0	1	0	4	0	0	0	0	0	0	0		Z(234)	0	0	0	0	0	900.32	0	1687.19	0	0	0	0	0	0	0
Y(235)	0	0	0	0	0	3	0	4	0	0	0	0	0	0	0		Z(235)	0	0	0	0	0	900.43	0	1699.79	0	0	0	0	0	0	0
Y(236)	0	0	0	0	0	4	0	4	0	0	0	0	0	0	0		Z(236)	0	0	0	0	0	904.39	0	1742.79	0	0	0	0	0	0	0
Y(237)	0	0	0	0	0	1	0	4	0	0	0	0	0	0	0		Z(237)	0	0	0	0	0	1072.03	0	1746.39	0	0	0	0	0	0	0
Y(238)	0	0	0	0	0	3	0	4	0	0	0	0	0	0	0		Z(238)	0	0	0	0	0	1072.14	0	1763.19	0	0	0	0	0	0	0
Y(239)	0	0	0	0	0	4	0	0	0	0	0	0	0	0	0		Z(239)	0	0	0	0	0	1074.99	0	0	0	0	0	0	0	0	0
Y(240)	0	0	0	0	0	2	0	0	0	0	0	0	0	0	0		Z(240)	0	0	0	0	0	1234.91	0	0	0	0	0	0	0	0	0
Y(241)	0	0	0	0	0	4	0	0	0	0	0	0	0	0	0		Z(241)	0	0	0	0	0	1245.79	0	0	0	0	0	0	0	0	0
Y(242)	0	0	0	0	0	2	0	0	0	0	0	0	0	0	0		Z(242)	0	0	0	0	0	1264.71	0	0	0	0	0	0	0	0	0
Y(243)	0	0	0	0	0	2	0	0	0	0	0	0	0	0	0		Z(243)	0	0	0	0	0	1267.98	0	0	0	0	0	0	0	0	0
Y(244)	0	0	0	0	0	2	0	0	0	0	0	0	0	0	0		Z(244)	0	0	0	0	0	1295.18	0	0	0	0	0	0	0	0	0
Y(245)	0	0	0	0	0	4	0	0	0	0	0	0	0	0	0		Z(245)	0	0	0	0	0	1302.39	0	0	0	0	0	0	0	0	0
Y(246)	0	0	0	0	0	1	0	0	0	0	0	0	0	0	0		Z(246)	0	0	0	0	0	1537.12	0	0	0	0	0	0	0	0	0
Y(247)	0	0	0	0	0	3	0	0	0	0	0	0	0	0	0		Z(247)	0	0	0	0	0	1537.23	0	0	0	0	0	0	0	0	0
Y(248)	0	0	0	0	0	0	0	0	0	0	0	0	0	0	0		Z(248)	0	0	0	0	0	0	0	0	0	0	0	0	0	0	0
Y(249)	0	0	0	0	0	0	0	0	0	0	0	0	0	0	0		Z(249)	0	0	0	0	0	0	0	0	0	0	0	0	0	0	0
Y(250)	0	0	0	0	0	0	0	0	0	0	0	0	0	0	0		Z(250)	0	0	0	0	0	0	0	0	0	0	0	0	0	0	0
Y(251)	0	0	0	0	0	0	0	0	0	0	0	0	0	0	0		Z(251)	0	0	0	0	0	0	0	0	0	0	0	0	0	0	0
Y(252)	0	0	0	0	0	0	0	0	0	0	0	0	0	0	0		Z(252)	0	0	0	0	0	0	0	0	0	0	0	0	0	0	0
Y(253)	0	0	0	0	0	0	0	0	0	0	0	0	0	0	0		Z(253)	0	0	0	0	0	0	0	0	0	0	0	0	0	0	0
Y(254)	0	0	0	0	0	0	0	0	0	0	0	0	0	0	0		Z(254)	0	0	0	0	0	0	0	0	0	0	0	0	0	0	0
Y(255)	0	0	0	0	0	0	0	0	0	0	0	0	0	0	0		Z(255)	0	0	0	0	0	0	0	0	0	0	0	0	0	0	0
Y(256)	0	0	0	0	0	0	0	0	0	0	0	0	0	0	0		Z(256)	0	0	0	0	0	0	0	0	0	0	0	0	0	0	0
Y(257)	0	0	0	0	0	0	0	0	0	0	0	0	0	0	0		Z(257)	0	0	0	0	0	0	0	0	0	0	0	0	0	0	0
Y(258)	0	0	0	0	0	0	0	0	0	0	0	0	0	0	0		Z(258)	0	0	0	0	0	0	0	0	0	0	0	0	0	0	0
Y(259)	0	0	0	0	0	0	0	0	0	0	0	0	0	0	0		Z(259)	0	0	0	0	0	0	0	0	0	0	0	0	0	0	0
Y(260)	0	0	0	0	0	0	0	0	0	0	0	0	0	0	0		Z(260)	0	0	0	0	0	0	0	0	0	0	0	0	0	0	0
Y(261)	0	0	0	0	0	0	0	0	0	0	0	0	0	0	0		Z(261)	0	0	0	0	0	0	0	0	0	0	0	0	0	0	0
Y(262)	0	0	0	0	0	0	0	0	0	0	0	0	0	0	0		Z(262)	0	0	0	0	0	0	0	0	0	0	0	0	0	0	0
Y(263)	0	0	0	0	0	0	0	0	0	0	0	0	0	0	0		Z(263)	0	0	0	0	0	0	0	0	0	0	0	0	0	0	0
Y(264)	0	0	0	0	0	0	0	0	0	0	0	0	0	0	0		Z(264)	0	0	0	0	0	0	0	0	0	0	0	0	0	0	0
Y(265)	0	0	0	0	0	0	0	0	0	0	0	0	0	0	0		Z(265)	0	0	0	0	0	0	0	0	0	0	0	0	0	0	0
Y(266)	0	0	0	0	0	0	0	0	0	0	0	0	0	0	0		Z(266)	0	0	0	0	0	0	0	0	0	0	0	0	0	0	0
Y(267)	0	0	0	0	0	0	0	0	0	0	0	0	0	0	0		Z(267)	0	0	0	0	0	0	0	0	0	0	0	0	0	0	0
Y(268)	0	0	0	0	0	0	0	0	0	0	0	0	0	0	0		Z(268)	0	0	0	0	0	0	0	0	0	0	0	0	0	0	0
Y(269)	0	0	0	0	0	0	0	0	0	0	0	0	0	0	0		Z(269)	0	0	0	0	0	0	0	0	0	0	0	0	0	0	0
Y(270)	0	0	0	0	0	0	0	0	0	0	0	0	0	0	0		Z(270)	0	0	0	0	0	0	0	0	0	0	0	0	0	0	0
Y(271)	0	0	0	0	0	0	0	0	0	0	0	0	0	0	0		Z(271)	0	0	0	0	0	0	0	0	0	0	0	0	0	0	0
Y(272)	0	0	0	0	0	0	0	0	0	0	0	0	0	0	0		Z(272)	0	0	0	0	0	0	0	0	0	0	0	0	0	0	0
Y(273)	0	0	0	0	0	0	0	0	0	0	0	0	0	0	0		Z(273)	0	0	0	0	0	0	0	0	0	0	0	0	0	0	0
Y(274)	0	0	0	0	0	0	0	0	0	0	0	0	0	0	0		Z(274)	0	0	0	0	0	0	0	0	0	0	0	0	0	0	0
Y(275)	0	0	0	0	0	0	0	0	0	0	0	0	0	0	0		Z(275)	0	0	0	0	0	0	0	0	0	0	0	0	0	0	0
Y(276)	0	0	0	0	0	0	0	0	0	0	0	0	0	0	0		Z(276)	0	0	0	0	0	0	0	0	0	0	0	0	0	0	0
Y(277)	0	0	0	0	0	0	0	0	0	0	0	0	0	0	0		Z(277)	0	0	0	0	0	0	0	0	0	0	0	0	0	0	0
Y(278)	0	0	0	0	0	0	0	0	0	0	0	0	0	0	0		Z(278)	0	0	0	0	0	0	0	0	0	0	0	0	0	0	0
Y(279)	0	0	0	0	0	0	0	0	0	0	0	0	0	0	0		Z(279)	0	0	0	0	0	0	0	0	0	0	0	0	0	0	0
Y(280)	0	0	0	0	0	0	0	0	0	0	0	0	0	0	0		Z(280)	0	0	0	0	0	0	0	0	0	0	0	0	0	0	0
Y(281)	0	0	0	0	0	0	0	0	0	0	0	0	0	0	0		Z(281)	0	0	0	0	0	0	0	0	0	0	0	0	0	0	0
Y(282)	0	0	0	0	0	0	0	0	0	0	0	0	0	0	0		Z(282)	0	0	0	0	0	0	0	0	0	0	0	0	0	0	0
Y(283)	0	0	0	0	0	0	0	0	0	0	0	0	0	0	0		Z(283)	0	0	0	0	0	0	0	0	0	0	0	0	0	0	0
Y(284)	0	0	0	0	0	0	0	0	0	0	0	0	0	0	0		Z(284)	0	0	0	0	0	0	0	0	0	0	0	0	0	0	0
Y(285)	0	0	0	0	0	0	0	0	0	0	0	0	0	0	0		Z(285)	0	0	0	0	0	0	0	0	0	0	0	0	0	0	0
Y(286)	0	0	0	0	0	0	0	0	0	0	0	0	0	0	0		Z(286)	0	0	0	0	0	0	0	0	0	0	0	0	0	0	0
Y(287)	0	0	0	0	0	0	0	0	0	0	0	0	0	0	0		Z(287)	0	0	0	0	0	0	0	0	0	0	0	0	0	0	0
Y(288)	0	0	0	0	0	0	0	0	0	0	0	0	0	0	0		Z(288)	0	0	0	0	0	0	0	0	0	0	0	0	0	0	0
Y(289)	0	0	0	0	0	0	0	0	0	0	0	0	0	0	0		Z(289)	0	0	0	0	0	0	0	0	0	0	0	0	0	0	0
Y(290)	0	0	0	0	0	0	0	0	0	0	0	0	0	0	0		Z(290)	0	0	0	0	0	0	0	0	0	0	0	0	0	0	0
Y(291)	0	0	0	0	0	0	0	0	0	0	0	0	0	0	0		Z(291)	0	0	0	0	0	0	0	0	0	0	0	0	0	0	0
Y(292)	0	0	0	0	0	0	0	0	0	0	0	0	0	0	0		Z(292)	0	0	0	0	0	0	0	0	0	0	0	0	0	0	0
Y(293)	0	0	0	0	0	0	0	0	0	0	0	0	0	0	0		Z(293)	0	0	0	0	0	0	0	0	0	0	0	0	0	0	0
Y(294)	0	0	0	0	0	0	0	0	0	0	0	0	0	0	0		Z(294)	0	0	0	0	0	0	0	0	0	0	0	0	0	0	0
Y(295)	0	0	0	0	0	0	0	0	0	0	0	0	0	0	0		Z(295)	0	0	0	0	0	0	0	0	0	0	0	0	0	0	0
Y(296)	0	0	0	0	0	0	0	0	0	0	0	0	0	0	0		Z(296)	0	0	0	0	0	0	0	0	0	0	0	0	0	0	0
Y(297)	0	0	0	0	0	0	0	0	0	0	0	0	0	0	0		Z(297)	0	0	0	0	0	0	0	0	0	0	0	0	0	0	0
Y(298)	0	0	0	0	0	0	0	0	0	0	0	0	0	0	0		Z(298)	0	0	0	0	0	0	0	0	0	0	0	0	0	0	0
Y(299)	0	0	0	0	0	0	0	0	0	0	0	0	0	0	0		Z(299)	0	0	0	0	0	0	0	0	0	0	0	0	0	0	0
Y(300)	0	0	0	0	0	0	0	0	0	0	0	0	0	0	0		Z(300)	0	0	0	0	0	0	0	0	0	0	0	0	0	0	0
Y(301)	0	0	0	0	0	0	0	0	0	0	0	0	0	0	0		Z(301)	0	0	0	0	0	0	0	0	0	0	0	0	0	0	0
Y(302)	0	0	0	0	0	0	0	0	0	0	0	0	0	0	0		Z(302)	0	0	0	0	0	0	0	0	0	0	0	0	0	0	0
Y(303)	0	0	0	0	0	0	0	0	0	0	0	0	0	0	0		Z(303)	0	0	0	0	0	0	0	0	0	0	0	0	0	0	0
Y(304)	0	0	0	0	0	0	0	0	0	0	0	0	0	0	0		Z(304)	0	0	0	0	0	0	0	0	0	0	0	0	0	0	0
Y(305)	0	0	0	0	0	0	0	0	0	0	0	0	0	0	0		Z(305)	0	0	0	0	0	0	0	0	0	0	0	0	0	0	0
Y(306)	0	0	0	0	0	0	0	0	0	0	0	0	0	0	0		Z(306)	0	0	0	0	0	0	0	0	0	0	0	0	0	0	0
Y(307)	0	0	0	0	0	0	0	0	0	0	0	0	0	0	0		Z(307)	0	0	0	0	0	0	0	0	0	0	0	0	0	0	0
Y(308)	0	0	0	0	0	0	0	0	0	0	0	0	0	0	0		Z(308)	0	0	0	0	0	0	0	0	0	0	0	0	0	0	0
Y(309)	0	0	0	0	0	0	0	0	0	0	0	0	0	0	0		Z(309)	0	0	0	0	0	0	0	0	0	0	0	0	0	0	0
Y(310)	0	0	0	0	0	0	0	0	0	0	0	0	0	0	0		Z(310)	0	0	0	0	0	0	0	0	0	0	0	0	0	0	0
Y(311)	0	0	0	0	0	0	0	0	0	0	0	0	0	0	0		Z(311)	0	0	0	0	0	0	0	0	0	0	0	0	0	0	0
Y(312)	0	0	0	0	0	0	0	0	0	0	0	0	0	0	0		Z(312)	0	0	0	0	0	0	0	0	0	0	0	0	0	0	0
Y(313)	0	0	0	0	0	0	0	0	0	0	0	0	0	0	0		Z(313)	0	0	0	0	0	0	0	0	0	0	0	0	0	0	0
Y(314)	0	0	0	0	0	0	0	0	0	0	0	0	0	0	0		Z(314)	0	0	0	0	0	0	0	0	0	0	0	0	0	0	0
Y(315)	0	0	0	0	0	0	0	0	0	0	0	0	0	0	0		Z(315)	0	0	0	0	0	0	0	0	0	0	0	0	0	0	0
Y(316)	0	0	0	0	0	0	0	0	0	0	0	0	0	0	0		Z(316)	0	0	0	0	0	0	0	0	0	0	0	0	0	0	0
Y(317)	0	0	0	0	0	0	0	0	0	0	0	0	0	0	0		Z(317)	0	0	0	0	0	0	0	0	0	0	0	0	0	0	0
Y(318)	0	0	0	0	0	0	0	0	0	0	0	0	0	0	0		Z(318)	0	0	0	0	0	0	0	0	0	0	0	0	0	0	0
Y(319)	0	0	0	0	0	0	0	0	0	0	0	0	0	0	0		Z(319)	0	0	0	0	0	0	0	0	0	0	0	0	0	0	0
Y(320)	0	0	0	0	0	0	0	0	0	0	0	0	0	0	0		Z(320)	0	0	0	0	0	0	0	0	0	0	0	0	0	0	0
Y(321)	0	0	0	0	0	0	0	0	0	0	0	0	0	0	0		Z(321)	0	0	0	0	0	0	0	0	0	0	0	0	0	0	0
Y(322)	0	0	0	0	0	0	0	0	0	0	0	0	0	0	0		Z(322)	0	0	0	0	0	0	0	0	0	0	0	0	0	0	0
Y(323)	0	0	0	0	0	0	0	0	0	0	0	0	0	0	0		Z(323)	0	0	0	0	0	0	0	0	0	0	0	0	0	0	0
Y(324)	0	0	0	0	0	0	0	0	0	0	0	0	0	0	0		Z(324)	0	0	0	0	0	0	0	0	0	0	0	0	0	0	0
Y(325)	0	0	0	0	0	0	0	0	0	0	0	0	0	0	0		Z(325)	0	0	0	0	0	0	0	0	0	0	0	0	0	0	0
Y(326)	0	0	0	0	0	0	0	0	0	0	0	0	0	0	0		Z(326)	0	0	0	0	0	0	0	0	0	0	0	0	0	0	0
Y(327)	0	0	0	0	0	0	0	0	0	0	0	0	0	0	0		Z(327)	0	0	0	0	0	0	0	0	0	0	0	0	0	0	0
Y(328)	0	0	0	0	0	0	0	0	0	0	0	0	0	0	0		Z(328)	0	0	0	0	0	0	0	0	0	0	0	0	0	0	0
Y(329)	0	0	0	0	0	0	0	0	0	0	0	0	0	0	0		Z(329)	0	0	0	0	0	0	0	0	0	0	0	0	0	0	0
Y(330)	0	0	0	0	0	0	0	0	0	0	0	0	0	0	0		Z(330)	0	0	0	0	0	0	0	0	0	0	0	0	0	0	0
Y(331)	0	0	0	0	0	0	0	0	0	0	0	0	0	0	0		Z(331)	0	0	0	0	0	0	0	0	0	0	0	0	0	0	0
Y(332)	0	0	0	0	0	0	0	0	0	0	0	0	0	0	0		Z(332)	0	0	0	0	0	0	0	0	0	0	0	0	0	0	0
Y(333)	0	0	0	0	0	0	0	0	0	0	0	0	0	0	0		Z(333)	0	0	0	0	0	0	0	0	0	0	0	0	0	0	0
Y(334)	0	0	0	0	0	0	0	0	0	0	0	0	0	0	0		Z(334)	0	0	0	0	0	0	0	0	0	0	0	0	0	0	0
Y(335)	0	0	0	0	0	0	0	0	0	0	0	0	0	0	0		Z(335)	0	0	0	0	0	0	0	0	0	0	0	0	0	0	0
Y(336)	0	0	0	0	0	0	0	0	0	0	0	0	0	0	0		Z(336)	0	0	0	0	0	0	0	0	0	0	0	0	0	0	0
Y(337)	0	0	0	0	0	0	0	0	0	0	0	0	0	0	0		Z(337)	0	0	0	0	0	0	0	0	0	0	0	0	0	0	0
Y(338)	0	0	0	0	0	0	0	0	0	0	0	0	0	0	0		Z(338)	0	0	0	0	0	0	0	0	0	0	0	0	0	0	0
Y(339)	0	0	0	0	0	0	0	0	0	0	0	0	0	0	0		Z(339)	0	0	0	0	0	0	0	0	0	0	0	0	0	0	0
Y(340)	0	0	0	0	0	0	0	0	0	0	0	0	0	0	0		Z(340)	0	0	0	0	0	0	0	0	0	0	0	0	0	0	0
Y(341)	0	0	0	0	0	0	0	0	0	0	0	0	0	0	0		Z(341)	0	0	0	0	0	0	0	0	0	0	0	0	0	0	0
Y(342)	0	0	0	0	0	0	0	0	0	0	0	0	0	0	0		Z(342)	0	0	0	0	0	0	0	0	0	0	0	0	0	0	0
[truncated: 881 more columns]

## Sheet: Days 30-36
DAY 30																																	DAY 31
Y Matrix (event stamp)	*	*	*		*		*		*			*		*		Z Matrix (time stamp)	*	*	*		*		*		*			*		*			Y Matrix (event stamp)	*	*	*		*		*		*			*		*		Z Matrix (time stamp)
Subject	B1_L	R1_L	B2_L	B3_M	R3_L	R4_M	B4_L	R5_M	B5_L	B6_M	B7_M	R7_L	R8_M	B8_L		Subject	B1_L	R1_L	B2_L	B3_M	R3_L	R4_M	B4_L	R5_M	B5_L	B6_M	B7_M	R7_L	R8_M	B8_L			Subject	B1_L	R1_L	B2_L	B3_M	R3_L	R4_M	B4_L	R5_M	B5_L	B6_M	B7_M	R7_L	R8_M	B8_L		Subject
Start Date	07/29/14	07/29/14	07/29/14	07/29/14	07/29/14	07/29/14	07/29/14	07/29/14	07/29/14	07/29/14	07/29/14	07/29/14	07/29/14	07/29/14		Start Date	07/29/14	07/29/14	07/29/14	07/29/14	07/29/14	07/29/14	07/29/14	07/29/14	07/29/14	07/29/14	07/29/14	07/29/14	07/29/14	07/29/14			Start Date	07/30/14	07/30/14	07/30/14	07/30/14	07/30/14	07/30/14	07/30/14	07/30/14	07/30/14	07/30/14	07/30/14	07/30/14	07/30/14	07/30/14		Start Date
Start Time	09:25:25	10:13:05	10:13:05	09:25:25	10:13:05	09:25:25	10:13:05	09:25:25	10:13:05	09:25:25	09:25:25	10:13:05	09:25:25	10:13:05		Start Time	09:25:25	10:13:05	10:13:05	09:25:25	10:13:05	09:25:25	10:13:05	09:25:25	10:13:05	09:25:25	09:25:25	10:13:05	09:25:25	10:13:05			Start Time	09:18:13	10:00:48	10:00:48	09:18:14	10:00:48	09:18:14	10:00:48	09:18:14	10:00:48	09:18:14	09:18:14	10:00:48	09:18:14	10:00:48		Start Time
Experiment	JBG013	JBG013	JBG013	JBG013	JBG013	JBG013	JBG013	JBG013	JBG013	JBG013	JBG013	JBG013	JBG013	JBG013		Experiment	JBG013	JBG013	JBG013	JBG013	JBG013	JBG013	JBG013	JBG013	JBG013	JBG013	JBG013	JBG013	JBG013	JBG013			Experiment	JBG013	JBG013	JBG013	JBG013	JBG013	JBG013	JBG013	JBG013	JBG013	JBG013	JBG013	JBG013	JBG013	JBG013		Experiment
Box	1	1	2	3	3	4	4	5	5	6	7	7	8	8		Box	1	1	2	3	3	4	4	5	5	6	7	7	8	8			Box	1	1	2	3	3	4	4	5	5	6	7	7	8	8		Box
Total Inactive Reponses (1)	814	642	701	562	753	588	854	601	579	428	517	602	476	587		Total Inactive Reponses (1)	814	642	701	562	753	588	854	601	579	428	517	602	476	587			Total Inactive Reponses (1)	520	706	403	473	1138	471	1086	656	642	485	431	745	406	609		Total Inactive Reponses (1)
Total Inactive Reponses (2)	14	0	0	0	0	0	0	1	9	0	0	4	0	0		Total Inactive Reponses (2)	14	0	0	0	0	0	0	1	9	0	0	4	0	0			Total Inactive Reponses (2)	0	21	5	0	0	0	8	0	0	2	0	49	0	5		Total Inactive Reponses (2)
Magazine Entries (4)	61	76	68	22	74	34	137	57	54	21	37	61	21	62		Magazine Entries (4)	61	76	68	22	74	34	137	57	54	21	37	61	21	62			Magazine Entries (4)	35	66	30	29	161	31	155	61	70	25	39	91	21	61		Magazine Entries (4)
Delivered Pellets (3)	20	20	20	20	20	20	20	20	20	20	20	20	20	20		Delivered Pellets (3)	20	20	20	20	20	20	20	20	20	20	20	20	20	20			Delivered Pellets (3)	20	20	20	20	20	20	20	20	20	20	20	20	20	20		Delivered Pellets (3)
Raw Mag Entries	68	94	71	26	82	39	152	62	60	21	44	65	22	62		Raw Mag Entries	68	94	71	26	82	39	152	62	60	21	44	65	22	62			Raw Mag Entries	40	78	32	32	180	35	170	62	77	25	44	97	24	65		Raw Mag Entries
Time (centiseconds)	77127	49338	52776	43897	78992	53722	51678	78899	58111	35089	47989	40480	39766	33392		Time (centiseconds)	77127	49338	52776	43897	78992	53722	51678	78899	58111	35089	47989	40480	39766	33392			Time (centiseconds)	55888	53632	44671	41552	110943	49948	71813	88768	69718	34145	42697	48629	38044	37168		Time (centiseconds)
# of Stamped Events	909	738	789	604	847	642	1011	679	662	469	574	687	517	669		# of Stamped Events	909	738	789	604	847	642	1011	679	662	469	574	687	517	669			# of Stamped Events	575	813	458	522	1319	522	1269	737	732	532	490	905	447	695		# of Stamped Events
Y(1)	2	1	1	1	1	1	1	1	2	1	1	2	1	4		Z(1)	3.98	0.58	1.94	5.45	3.96	2.4	1.57	0.2	6.07	2.29	1.58	10.83	1.56	1.39			Y(1)	1	2	2	1	1	1	1	1	1	2	1	2	1	2		Z(1)
Y(2)	2	1	3	1	1	1	1	4	2	1	1	2	1	1		Z(2)	4.12	1.15	2.05	5.65	4.29	3.19	1.84	0.99	7.6	2.74	1.72	11.59	2.17	2.9			Y(2)	1	2	2	3	1	1	1	1	1	2	1	2	1	2		Z(2)
Y(3)	2	3	1	1	1	1	4	1	2	1	1	2	1	1		Z(3)	4.83	1.26	2.45	5.87	4.47	3.4	3.19	2.17	7.62	2.87	2.35	11.88	2.34	3.18			Y(3)	1	2	2	4	1	1	1	1	1	1	1	2	1	2		Z(3)
Y(4)	2	1	1	3	1	1	4	1	2	1	1	2	1	1		Z(4)	4.96	1.6	2.6	5.98	4.93	3.98	3.59	2.62	12.98	3.49	2.54	12.08	2.81	3.28			Y(4)	1	2	2	1	1	3	1	1	3	1	3	2	1	2		Z(4)
Y(5)	2	1	1	4	1	1	1	1	2	1	1	1	1	1		Z(5)	5.08	2.03	2.9	6.79	5.04	5.03	4.11	2.77	13.18	3.63	2.68	13.27	2.98	3.81			Y(5)	1	2	1	1	1	1	4	1	1	1	4	2	1	2		Z(5)
Y(6)	2	1	1	1	1	1	1	1	2	1	1	1	1	1		Z(6)	5.37	2.46	3.13	12.64	5.35	5.86	4.22	2.96	13.61	4.43	2.92	13.55	3.32	3.89			Y(6)	1	2	1	1	1	1	1	1	1	1	1	2	1	1		Z(6)
Y(7)	2	1	1	1	1	1	1	1	2	3	1	1	1	1		Z(7)	6.47	2.68	3.33	13.52	5.86	6.61	4.34	3.08	13.73	4.54	3.07	14.07	4.32	4			Y(7)	1	2	1	1	1	1	1	1	1	1	1	2	1	1		Z(7)
Y(8)	2	1	4	1	1	1	1	1	2	4	1	1	1	1		Z(8)	6.65	2.86	4.39	13.97	6.15	6.72	4.68	3.53	15.89	5.59	3.22	14.29	4.47	4.25			Y(8)	3	2	3	1	1	1	4	1	1	1	1	2	1	1		Z(8)
Y(9)	2	1	1	1	1	1	1	1	2	1	1	1	1	4		Z(9)	8.32	3	12.81	14.39	6.41	7.41	4.76	3.68	17.66	13.56	3.51	14.61	4.63	4.99			Y(9)	4	2	1	1	1	1	1	1	1	4	1	2	3	1		Z(9)
Y(10)	2	4	1	1	1	1	1	3	1	1	1	1	3	1		Z(10)	9.47	3.99	13.06	14.94	7.96	7.67	4.97	3.79	21.95	13.78	4.21	14.94	4.74	6.14			Y(10)	1	2	1	1	1	1	1	1	1	1	1	2	4	4		Z(10)
Y(11)	2	4	1	1	1	1	1	4	1	1	1	1	4	1		Z(11)	9.71	9.99	13.18	15.06	8.37	7.79	5.5	4.59	22.7	14.24	4.41	15.07	5.79	6.25			Y(11)	1	2	1	1	1	1	1	1	3	1	1	2	1	1		Z(11)
Y(12)	1	1	1	1	1	1	1	1	1	1	1	1	1	1		Z(12)	12.7	10.76	13.72	15.2	8.59	7.91	5.8	16.85	23.08	14.41	4.81	15.34	15.83	6.36			Y(12)	1	2	1	1	1	1	4	1	4	1	1	2	1	1		Z(12)
Y(13)	1	1	1	1	1	1	4	1	1	1	1	1	1	1		Z(13)	12.82	11.13	15.41	15.35	8.71	8.87	6.59	17.07	23.53	14.56	4.99	15.59	16.42	6.55			Y(13)	1	2	1	1	1	1	1	1	4	1	1	2	1	1		Z(13)
Y(14)	1	1	1	1	1	1	4	1	1	1	1	1	1	1		Z(14)	13.22	11.27	15.58	15.94	8.83	9.25	7.39	17.86	24.11	14.69	6.85	16.85	16.75	6.97			Y(14)	1	2	1	1	1	1	1	1	4	1	1	2	1	1		Z(14)
Y(15)	1	1	1	1	1	3	1	1	1	1	1	1	1	1		Z(15)	13.35	11.55	15.8	16.74	8.95	9.36	8.44	18.35	24.27	15.35	7.16	17.17	16.85	7.09			Y(15)	1	2	1	1	1	1	1	1	1	1	1	2	1	1		Z(15)
Y(16)	1	1	1	1	1	4	1	1	1	1	1	1	1	1		Z(16)	15.28	12.39	15.92	16.98	9.09	10.19	8.75	18.93	24.49	15.49	7.27	17.43	17.04	7.23			Y(16)	4	2	1	1	1	1	1	1	1	1	1	2	1	1		Z(16)
Y(17)	1	1	1	1	1	1	1	1	1	1	1	1	1	1		Z(17)	15.55	12.47	16.18	17.56	9.74	21.39	9.06	19.46	26.87	15.62	7.44	17.76	17.42	7.53			Y(17)	1	2	4	1	1	1	1	1	1	1	1	2	1	1		Z(17)
Y(18)	1	1	1	1	1	1	1	1	1	1	1	1	1	1		Z(18)	15.8	12.76	16.36	17.86	10.18	22	9.27	20.19	27.55	16.09	7.82	18.05	17.55	7.72			Y(18)	1	2	1	1	1	1	1	4	1	1	1	2	1	1		Z(18)
Y(19)	1	1	1	1	1	1	1	1	1	1	1	1	1	1		Z(19)	16	13.32	16.57	18.03	11.72	22.36	9.39	20.73	28.42	16.33	8.06	18.46	17.98	7.91			Y(19)	1	2	1	1	1	1	1	1	1	1	3	2	1	1		Z(19)
Y(20)	1	1	1	1	1	1	1	1	1	1	1	1	1	1		Z(20)	16.15	13.6	16.89	18.51	12.03	22.54	9.56	21.14	28.57	16.65	8.31	18.77	18.43	8.04			Y(20)	1	2	1	1	1	3	1	1	1	1	4	2	1	1		Z(20)
Y(21)	1	1	1	1	1	1	1	1	4	1	1	1	1	1		Z(21)	16.29	13.84	17.05	18.97	12.17	23.2	9.84	21.74	29.59	17.29	8.49	18.99	18.66	8.2			Y(21)	1	1	1	1	1	4	4	1	1	1	4	2	1	4		Z(21)
Y(22)	1	1	1	1	1	1	4	1	1	1	1	1	1	1		Z(22)	16.43	14.06	17.18	19.1	12.29	23.92	10.39	22.27	30.82	17.49	8.7	19.19	18.81	8.61			Y(22)	1	1	1	1	1	4	1	1	1	1	1	2	3	1		Z(22)
Y(23)	1	1	4	1	1	1	1	1	1	1	1	1	1	1		Z(23)	16.6	14.17	18.19	19.42	12.41	24.02	11.4	22.96	31.25	17.63	9.02	20.92	19.02	8.76			Y(23)	1	1	1	1	1	4	1	1	1	1	1	2	4	1		Z(23)
Y(24)	1	4	1	1	3	3	1	1	1	1	1	1	1	4		Z(24)	16.81	14.99	23.77	19.8	12.52	24.13	11.76	23.64	31.35	17.83	9.17	21.15	19.24	9.59			Y(24)	1	1	1	1	1	1	1	1	1	1	1	2	1	1		Z(24)
Y(25)	1	1	1	1	1	4	1	1	1	1	1	1	1	1		Z(25)	17.17	16.13	23.92	20.14	12.85	24.79	11.86	24.02	32.02	18.02	9.36	21.45	19.39	10.6			Y(25)	1	1	1	3	1	1	4	1	1	1	1	2	1	1		Z(25)
Y(26)	1	1	1	1	1	1	1	1	1	1	1	1	1	1		Z(26)	19.19	16.96	23.98	20.61	13.36	35.38	11.95	24.61	32.18	18.42	9.53	21.78	19.53	10.72			Y(26)	1	1	1	4	1	1	1	1	1	1	1	2	1	1		Z(26)
Y(27)	1	1	1	1	1	1	1	1	1	1	1	1	1	1		Z(27)	19.56	17.61	24.17	20.75	13.47	35.76	12.07	25.21	32.32	19	9.69	22.01	19.92	10.84			Y(27)	1	4	1	1	1	1	1	1	1	1	1	2	1	1		Z(27)
Y(28)	1	1	1	1	1	1	1	1	1	1	3	1	1	1		Z(28)	19.7	17.73	24.31	21.02	13.65	35.88	12.18	25.59	32.41	19.68	9.8	22.39	20.05	11.04			Y(28)	1	1	4	1	1	1	1	1	1	1	1	2	1	1		Z(28)
Y(29)	1	1	1	1	4	1	1	1	4	1	4	1	1	1		Z(29)	20.4	18.43	24.38	21.28	14.19	36.15	12.3	26.17	33.39	20.37	10.59	22.73	20.18	11.14			Y(29)	1	1	1	1	1	1	1	1	1	1	1	2	1	1		Z(29)
Y(30)	1	1	1	3	1	1	1	1	1	1	4	1	1	1		Z(30)	20.52	18.62	24.6	21.39	31.48	36.63	12.77	26.71	34.89	20.5	23.79	22.89	20.35	11.26			Y(30)	1	1	1	1	4	1	2	1	1	1	3	2	1	1		Z(30)
Y(31)	1	1	1	4	1	1	1	4	1	1	1	1	1	1		Z(31)	20.97	18.81	24.83	22.59	31.87	37.04	12.91	28.19	34.97	20.64	27.08	23.25	20.59	11.84			Y(31)	1	1	1	1	1	1	2	1	1	1	1	2	1	1		Z(31)
Y(32)	1	1	1	1	1	1	1	1	1	1	1	1	1	1		Z(32)	23.97	19.01	25.03	29.27	32.02	37.16	13.04	29.04	35.27	20.83	27.36	23.67	20.71	12.66			Y(32)	1	1	1	1	1	1	2	1	4	4	1	2	1	1		Z(32)
Y(33)	1	1	1	1	1	1	4	1	1	1	1	1	1	1		Z(33)	24.28	20.63	25.35	30.14	32.47	37.28	13.79	29.16	36.66	21.26	27.53	23.88	20.89	12.79			Y(33)	1	1	1	1	1	1	2	1	1	1	1	2	1	1		Z(33)
Y(34)	1	1	1	1	1	1	1	1	1	1	1	1	1	1		Z(34)	24.41	20.92	25.63	30.36	35.31	37.63	14.66	29.26	36.69	21.66	27.94	24.13	21.07	13.26			Y(34)	4	1	1	1	1	1	2	1	1	1	1	2	3	1		Z(34)
Y(35)	1	1	4	1	1	1	1	1	1	1	1	1	1	1		Z(35)	25.24	21.09	26.59	31	35.42	37.85	15.04	29.61	37.12	21.92	28.29	24.61	21.4	13.38			Y(35)	1	1	1	1	1	1	1	1	1	1	1	2	4	1		Z(35)
Y(36)	1	1	1	1	1	1	1	1	1	3	1	1	1	4		Z(36)	25.38	22.03	26.98	31.47	35.77	38.44	15.45	29.93	37.46	22.03	28.4	24.79	21.65	13.99			Y(36)	1	1	1	1	1	3	1	1	1	1	1	2	1	4		Z(36)
Y(37)	1	1	1	1	1	1	1	1	3	4	1	1	1	1		Z(37)	25.73	22.2	27.07	31.85	36.37	38.65	15.59	30.48	37.57	23.39	28.79	25.19	22.1	15.2			Y(37)	1	4	1	1	1	4	1	1	1	1	1	2	1	4		Z(37)
Y(38)	1	1	1	1	1	1	1	1	4	1	1	1	1	1		Z(38)	28.21	23.32	27.31	32.21	36.48	38.86	15.8	31.09	38.99	29.92	29.22	27.34	22.34	15.3			Y(38)	4	1	1	1	1	4	1	1	1	1	3	2	1	1		Z(38)
Y(39)	1	3	1	1	1	1	1	1	4	1	3	1	1	1		Z(39)	28.37	23.43	27.42	32.52	36.64	39.33	15.9	31.77	49.19	30.12	29.33	27.62	22.64	15.41			Y(39)	1	1	1	1	1	1	4	1	1	1	4	2	1	1		Z(39)
Y(40)	1	1	1	1	4	1	1	1	4	1	4	1	1	1		Z(40)	28.88	23.68	27.57	32.98	37.59	39.44	16.08	32.12	50.59	30.29	30.39	27.85	22.75	15.53			Y(40)	1	1	1	1	1	1	1	1	1	1	4	2	1	1		Z(40)
Y(41)	1	1	1	1	4	1	1	1	1	1	4	1	1	1		Z(41)	29.07	24.23	27.69	33.62	38.19	39.84	16.49	32.65	52.32	30.42	31.19	28.1	22.88	15.78			Y(41)	1	1	1	1	1	1	1	1	1	1	4	2	1	1		Z(41)
Y(42)	1	4	1	3	1	1	1	1	1	1	4	1	1	1		Z(42)	29.19	25.19	27.94	33.73	39.17	40.17	16.77	33.09	52.84	30.55	41.19	28.46	23.28	15.85			Y(42)	1	1	1	1	3	1	1	1	1	1	4	2	1	1		Z(42)
Y(43)	1	1	1	4	1	1	3	1	1	1	1	1	1	1		Z(43)	29.82	31.48	28.19	34.79	39.57	40.45	16.88	33.25	53.02	30.68	42.7	28.59	24.15	15.94			Y(43)	1	1	1	1	4	1	1	3	1	1	1	2	1	1		Z(43)
Y(44)	1	1	1	1	1	1	4	1	1	1	1	1	1	1		Z(44)	32.36	31.92	28.31	41.79	39.84	40.66	17.19	33.74	53.15	31.17	43.62	28.99	24.64	16.15			Y(44)	1	1	1	1	1	1	1	4	1	1	1	2	1	1		Z(44)
Y(45)	1	1	1	1	1	1	4	1	1	1	1	3	1	1		Z(45)	32.47	32.04	28.58	42.05	39.97	41.18	24.99	34.15	53.59	31.28	43.76	29.2	24.79	16.35			Y(45)	1	1	1	1	1	1	1	1	1	1	1	2	1	1		Z(45)
Y(46)	1	1	1	1	1	1	1	1	1	1	1	1	1	1		Z(46)	32.58	32.64	28.9	42.63	40.43	41.71	26.32	34.59	53.71	31.74	44.05	29.33	24.94	16.55			Y(46)	1	1	1	1	1	1	1	1	3	1	1	2	1	1		Z(46)
Y(47)	1	1	4	1	1	1	1	1	1	1	1	1	1	1		Z(47)	32.7	32.78	29.59	43.02	40.57	42.02	26.43	35.25	54.07	32.33	44.36	29.51	25.18	16.85			Y(47)	1	1	1	4	1	1	1	1	1	1	1	1	1	1		Z(47)
Y(48)	3	1	1	1	1	1	1	1	1	1	1	1	1	1		Z(48)	32.81	32.9	30.2	43.29	40.68	42.13	26.59	35.86	55.58	32.46	45.26	29.97	25.45	17.03			Y(48)	1	4	1	1	1	1	1	1	4	1	1	1	1	1		Z(48)
Y(49)	4	1	1	1	1	1	1	1	1	1	1	1	1	1		Z(49)	34.79	33.03	30.32	43.59	40.84	42.83	26.97	36.31	55.96	33.13	45.39	30.25	26.1	17.21			Y(49)	1	1	3	1	1	1	1	1	1	3	1	1	1	1		Z(49)
Y(50)	1	3	1	1	1	1	1	1	1	1	1	4	1	1		Z(50)	46.67	33.14	30.41	43.99	40.98	42.94	27.13	36.83	56.14	33.5	45.58	31.59	26.52	17.4			Y(50)	1	1	1	1	1	1	1	1	1	4	1	3	3	1		Z(50)
Y(51)	1	1	1	1	1	1	1	1	1	1	1	4	1	1		Z(51)	46.74	33.72	30.52	44.28	42.94	43.55	27.25	37.4	56.85	33.7	45.89	38.19	26.95	17.69			Y(51)	1	1	1	1	4	1	1	1	1	1	1	1	4	1		Z(51)
Y(52)	1	1	1	1	1	1	1	1	1	1	1	1	1	1		Z(52)	46.91	34.02	30.63	44.54	43.24	43.68	27.53	37.95	57.18	33.99	46.3	40.03	28.68	17.83			Y(52)	1	1	1	1	1	1	1	1	1	1	1	1	1	1		Z(52)
Y(53)	1	4	1	1	1	1	1	1	1	1	1	1	1	1		Z(53)	47.16	34.79	30.82	44.78	43.52	44.22	27.94	38.35	59.08	34.53	46.62	40.12	28.84	18.13			Y(53)	3	1	4	1	1	1	1	1	1	1	1	1	1	1		Z(53)
Y(54)	1	1	1	1	1	3	1	1	3	1	1	1	1	4		Z(54)	47.39	41.81	30.96	44.97	43.64	44.33	28.27	38.83	59.19	35.06	47.22	40.68	29.03	19.19			Y(54)	1	1	1	1	1	1	1	1	1	1	1	1	1	4		Z(54)
Y(55)	1	1	1	1	1	4	4	1	1	1	1	1	1	1		Z(55)	47.67	42.03	31.1	45.13	44.3	44.99	28.79	39.26	59.67	35.28	47.57	40.99	29.38	19.96			Y(55)	4	1	1	1	1	1	4	1	1	1	1	1	1	1		Z(55)
Y(56)	1	1	1	1	1	1	4	1	1	1	1	1	1	1		Z(56)	47.8	42.75	31.52	45.36	44.42	62.59	29.39	39.87	60.09	35.79	47.77	41.17	29.51	20.36			Y(56)	1	1	1	1	1	1	1	1	1	1	1	1	1	1		Z(56)
Y(57)	1	1	1	1	1	1	1	1	4	1	1	1	1	1		Z(57)	50.04	42.9	31.78	45.66	44.67	63.02	30.19	40.59	61.79	35.94	48.19	41.33	29.65	20.46			Y(57)	1	1	1	1	1	1	1	1	1	1	1	1	1	1		Z(57)
Y(58)	1	1	1	1	4	1	1	3	1	3	1	1	3	1		Z(58)	50.24	43.62	33.41	46.06	45.99	63.51	30.28	40.7	71.98	36.05	48.71	41.63	29.86	20.56			Y(58)	1	1	1	1	1	1	1	1	1	1	1	4	1	1		Z(58)
Y(59)	1	1	1	1	1	1	1	4	1	4	1	1	4	1		Z(59)	50.37	43.78	33.6	46.75	46.88	63.64	30.36	41.39	72.61	37.19	49.07	41.88	30.59	20.7			Y(59)	1	1	1	1	1	1	1	1	1	1	1	2	1	1		Z(59)
Y(60)	1	1	3	1	1	1	1	1	1	1	1	1	1	1		Z(60)	50.8	45.72	33.71	47.06	47.07	64.29	30.58	57.25	72.67	47.2	49.46	42.13	39.04	20.81			Y(60)	1	1	1	1	1	3	1	1	1	1	1	2	1	1		Z(60)
Y(61)	1	1	1	3	1	1	1	1	1	1	1	1	1	1		Z(61)	51.14	45.93	33.83	47.17	47.21	64.78	30.73	57.56	73.48	47.37	49.59	42.5	40.43	20.92			Y(61)	1	1	1	1	1	4	1	1	4	1	1	2	1	1		Z(61)
Y(62)	1	1	1	4	1	1	1	1	1	1	3	1	1	1		Z(62)	51.65	46.07	33.94	48.19	47.33	65.73	31.04	58.4	73.59	47.53	49.7	42.71	40.53	21.19			Y(62)	1	2	1	1	1	1	1	1	4	1	1	1	1	1		Z(62)
Y(63)	1	1	1	1	1	1	1	1	4	1	4	1	1	1		Z(63)	52.05	47.02	34.3	52.97	47.44	65.98	31.08	58.77	74.99	47.95	50.59	42.98	40.69	21.32			Y(63)	1	1	1	1	1	1	1	1	1	1	1	1	1	1		Z(63)
Y(64)	1	1	1	1	1	1	1	1	1	1	4	1	1	1		Z(64)	54.28	47.17	34.87	53.12	47.77	66.42	31.5	59.37	75.91	48.46	62.59	43.2	41.02	21.43			Y(64)	1	3	1	1	1	1	1	1	1	1	1	1	1	3		Z(64)
Y(65)	1	1	1	1	1	1	1	1	1	1	1	1	1	4		Z(65)	54.41	47.29	35.01	53.65	48	66.81	31.65	60.29	76.02	48.63	68.81	43.52	41.5	22.99			Y(65)	4	1	1	1	4	1	1	1	1	1	1	1	1	1		Z(65)
Y(66)	1	1	1	1	1	1	1	1	1	1	1	3	1	1		Z(66)	59.05	47.48	35.22	54.01	48.13	67.08	31.78	61.11	76.51	49.29	68.93	43.63	41.61	23.98			Y(66)	1	1	1	1	1	1	1	1	1	1	1	1	1	1		Z(66)
Y(67)	1	1	4	1	1	1	4	1	1	1	1	1	1	1		Z(67)	59.23	47.64	36.59	54.23	48.25	67.84	32.39	61.6	76.63	49.77	69.18	44.84	41.75	24.09			Y(67)	1	1	1	1	1	1	1	1	1	1	1	1	1	1		Z(67)
Y(68)	1	1	1	1	1	1	4	1	1	1	1	1	1	1		Z(68)	59.73	49.46	43.6	54.61	48.4	68.33	33.19	62.42	76.78	49.9	69.5	44.98	41.98	24.2			Y(68)	1	1	1	1	1	1	1	1	1	1	1	4	3	1		Z(68)
Y(69)	3	1	1	1	1	1	1	1	1	1	1	1	3	1		Z(69)	59.84	49.81	43.92	55.23	48.52	69.13	33.96	62.94	77.09	50.06	69.66	45.5	42.09	24.39			Y(69)	1	1	1	1	1	1	1	1	1	3	1	1	4	1		Z(69)
Y(70)	1	1	1	1	4	1	1	4	4	1	1	1	4	1		Z(70)	60.79	49.95	44.31	55.55	49.99	69.74	34.09	63.59	78.39	50.55	70.21	46.06	43.19	24.5			Y(70)	1	1	1	1	1	1	1	1	1	4	1	1	1	1		Z(70)
Y(71)	4	1	1	1	1	1	1	4	1	1	1	1	1	1		Z(71)	61.79	50.45	44.58	56.3	50.82	70.4	34.19	64.39	79.17	50.7	70.47	46.23	53.47	24.65			Y(71)	1	1	3	1	1	1	4	3	1	1	1	1	1	4		Z(71)
Y(72)	4	1	1	1	1	1	1	1	1	1	1	4	1	1		Z(72)	71.79	50.57	45.05	56.65	51.12	70.52	34.29	65.34	79.57	51.47	70.64	47.59	53.84	24.77			Y(72)	1	1	1	1	1	1	1	4	1	1	1	1	1	1		Z(72)
Y(73)	1	1	1	1	1	1	1	1	1	1	1	4	1	1		Z(73)	72.58	50.68	45.22	56.77	51.24	70.68	34.37	65.58	79.87	51.63	71.08	53.99	54.02	24.95			Y(73)	1	1	1	1	1	1	1	1	1	1	1	1	1	1		Z(73)
Y(74)	1	1	1	1	1	1	1	1	1	1	1	1	1	1		Z(74)	73	50.82	45.33	56.92	51.35	71.08	34.48	65.96	80.16	51.75	71.62	58.33	54.41	25.06			Y(74)	1	4	1	1	1	1	1	1	1	1	1	1	1	1		Z(74)
Y(75)	1	3	1	1	1	1	1	1	1	1	1	1	1	1		Z(75)	73.76	50.93	47.85	57.17	51.46	71.65	34.71	66.12	80.63	52.05	71.76	58.97	54.79	25.22			Y(75)	1	1	1	1	1	1	1	1	1	1	1	1	1	1		Z(75)
Y(76)	4	1	1	1	1	1	1	1	4	1	1	1	1	1		Z(76)	74.99	51.6	47.97	57.68	51.78	72.38	35.38	66.38	81.99	52.83	71.99	59.09	55.1	25.4			Y(76)	1	1	1	1	1	1	1	1	1	1	1	1	1	1		Z(76)
Y(77)	1	4	3	1	1	1	4	1	1	1	1	1	1	1		Z(77)	76.08	52.59	48.08	58.23	52.29	73.36	35.99	66.78	82.7	53.37	72.13	59.69	55.45	25.7			Y(77)	1	1	1	1	3	1	1	1	1	1	1	1	1	1		Z(77)
Y(78)	1	1	1	1	1	1	4	1	1	1	1	1	3	1		Z(78)	76.2	59.07	48.23	58.43	52.4	73.86	36.59	66.86	83.41	53.54	72.44	60.38	55.56	25.84			Y(78)	1	1	1	1	1	1	1	1	1	1	3	1	1	1		Z(78)
Y(79)	1	1	1	1	1	1	1	1	1	1	1	1	4	1		Z(79)	76.3	59.66	48.38	59.05	52.54	74.25	37.21	67.31	83.45	54.17	72.78	60.94	56.59	25.95			Y(79)	1	1	4	4	4	1	1	1	1	1	4	1	1	1		Z(79)
Y(80)	1	1	1	1	1	1	1	1	1	3	1	1	1	1		Z(80)	76.44	59.77	48.62	59.39	52.73	74.49	37.28	67.93	83.53	54.28	73.02	61.23	65.4	26.12			Y(80)	1	1	1	4	1	1	1	3	1	1	1	1	1	1		Z(80)
Y(81)	1	1	1	1	4	1	1	1	1	4	1	1	1	1		Z(81)	76.49	60.29	48.77	59.65	53.79	74.61	37.62	68.77	83.65	55.59	73.4	63.76	65.9	26.84			Y(81)	3	1	1	1	1	1	4	4	1	1	1	1	1	4		Z(81)
Y(82)	1	1	1	1	1	1	1	1	1	1	1	3	1	1		Z(82)	76.74	60.44	48.89	59.79	54.78	75.41	37.67	69.48	83.85	62.32	73.55	63.87	66.77	26.97			Y(82)	4	1	1	1	1	3	1	4	1	1	1	1	1	1		Z(82)
Y(83)	1	1	1	1	1	1	1	1	1	1	1	1	1	3		Z(83)	77.14	60.63	49.35	60.53	54.98	75.71	37.82	70.03	84.12	62.5	73.85	64.29	66.88	27.18			Y(83)	1	4	1	1	1	4	1	1	1	1	1	1	1	1		Z(83)
Y(84)	1	1	1	1	1	1	1	1	1	1	1	1	1	4		Z(84)	77.27	60.75	49.57	61.2	55.37	76.3	38.12	70.58	84.24	62.65	74.23	64.46	67.06	27.79			Y(84)	1	1	1	1	1	1	1	1	1	3	1	1	1	1		Z(84)
Y(85)	1	1	4	1	1	1	1	1	1	1	1	1	1	1		Z(85)	85.18	61.93	50.99	61.78	55.81	76.73	38.47	71.41	84.58	62.92	74.58	64.69	67.44	35.9			Y(85)	1	1	1	1	4	1	1	1	1	4	1	1	3	1		Z(85)
Y(86)	1	3	1	1	1	1	1	1	1	1	1	1	1	1		Z(86)	85.31	62.04	62.45	62.61	56.27	77.29	38.9	71.94	84.8	63.37	75.2	64.89	68.81	36.04			Y(86)	1	1	1	1	1	1	1	1	1	1	1	3	1	1		Z(86)
Y(87)	1	1	1	1	1	1	3	4	1	1	1	1	1	1		Z(87)	85.69	62.21	62.77	63.01	56.37	78.09	39.01	72.59	84.93	63.48	75.55	65.32	69.05	36.21			Y(87)	1	1	1	1	1	1	1	1	1	1	1	1	1	1		Z(87)
Y(88)	1	1	1	1	1	1	4	1	1	1	1	1	3	1		Z(88)	86.68	62.68	63.02	63.52	56.52	78.89	39.59	74.21	87	63.63	75.72	65.56	69.16	36.28			Y(88)	1	1	1	3	1	1	1	1	1	1	1	1	1	1		Z(88)
Y(89)	1	4	1	1	1	3	4	1	1	1	1	1	4	1		Z(89)	86.79	63.39	63.4	64	56.71	79	47.39	74.35	87.95	64.56	76	65.7	70.39	36.39			Y(89)	1	1	1	4	1	1	1	4	1	1	4	4	1	1		Z(89)
Y(90)	1	1	1	1	1	4	4	1	1	1	1	1	1	1		Z(90)	89.03	70.65	63.47	64.71	56.87	79.99	47.99	74.91	88.2	64.68	76.76	66.55	78.4	36.82			Y(90)	1	1	1	1	1	1	1	1	1	1	4	1	1	1		Z(90)
Y(91)	1	1	1	1	1	1	1	1	1	1	4	1	1	1		Z(91)	89.21	70.96	65.78	64.91	57	89.95	48.88	75.29	88.33	64.85	77.39	66.76	79.72	36.92			Y(91)	1	1	1	1	1	1	1	1	1	1	1	1	1	1		Z(91)
Y(92)	1	1	1	1	4	1	1	1	1	1	4	4	1	3		Z(92)	89.35	71.11	65.91	65.32	58.59	90.27	49	76.29	88.47	65.57	78.19	68.19	80.21	37.03			Y(92)	1	1	1	1	1	1	1	1	1	1	1	1	1	1		Z(92)
Y(93)	1	1	1	1	1	1	1	1	1	1	1	4	1	1		Z(93)	89.46	71.89	66.25	65.43	59.22	90.71	49.09	76.8	89.08	66.16	80.2	72.19	81	37.32			Y(93)	1	1	1	1	4	1	1	1	1	1	1	1	1	1		Z(93)
Y(94)	1	1	1	1	1	1	1	1	1	1	1	1	1	1		Z(94)	89.6	72.05	66.39	65.68	59.54	90.78	49.39	77.1	89.21	66.36	80.53	73.34	81.13	37.46			Y(94)	1	1	1	1	4	1	4	1	1	1	1	1	1	1		Z(94)
Y(95)	1	1	1	1	1	1	1	1	1	1	1	1	1	1		Z(95)	91.37	72.15	66.51	66.06	59.98	91.16	49.46	77.47	91.37	68.17	80.73	73.52	81.28	37.63			Y(95)	1	1	1	1	1	1	1	1	1	1	1	1	1	1		Z(95)
Y(96)	1	1	1	1	1	1	1	1	1	1	1	1	1	4		Z(96)	91.82	72.93	66.63	66.17	60.18	91.24	49.6	78.18	91.74	68.74	80.88	74.46	81.56	38.39			Y(96)	3	1	1	1	1	1	1	1	1	1	1	1	1	4		Z(96)
Y(97)	1	1	3	1	4	1	1	1	1	1	1	1	1	1		Z(97)	91.93	73.05	66.74	66.43	61.79	92.01	49.71	78.8	92.09	69.58	81.05	74.71	81.72	46.17			Y(97)	1	4	4	1	1	1	1	1	1	1	1	1	1	1		Z(97)
Y(98)	1	1	1	1	1	1	1	1	1	1	1	1	1	1		Z(98)	92.42	73.2	66.85	66.72	62.71	92.76	50.09	79.6	92.2	69.86	81.39	74.93	81.84	46.29			Y(98)	1	1	1	1	1	1	1	1	1	1	1	1	1	1		Z(98)
Y(99)	1	1	1	1	1	1	1	1	1	1	1	1	1	1		Z(99)	92.53	73.33	66.98	67.81	63.11	93.01	50.73	80.05	92.32	70.71	81.61	75.1	81.97	46.39			Y(99)	3	1	1	1	1	1	1	3	1	1	1	1	1	1		Z(99)
Y(100)	3	1	1	1	1	1	4	1	1	3	1	1	1	1		Z(100)	92.64	73.48	67.1	70.28	63.5	93.48	51.59	80.4	92.63	70.82	81.8	75.47	82.31	46.5			Y(100)	1	1	1	1	1	1	1	4	1	1	1	3	1	1		Z(100)
Y(101)	1	1	1	1	1	1	4	4	3	4	1	1	1	1		Z(101)	93.65	73.61	67.4	70.63	63.93	93.62	52.39	81.39	92.74	72.39	82.16	77.73	84.04	46.69			Y(101)	4	1	1	1	1	1	1	4	1	1	1	1	1	1		Z(101)
Y(102)	1	1	4	3	1	1	1	1	1	1	1	1	1	1		Z(102)	93.76	73.74	68.39	70.74	64.56	93.75	53.03	82.71	92.89	78.87	82.28	78.21	84.16	46.8			Y(102)	4	1	1	1	1	1	1	1	3	1	1	1	1	1		Z(102)
Y(103)	4	4	4	4	1	1	1	1	4	1	1	1	1	1		Z(103)	94.79	74.39	74.19	71.79	64.82	94.29	53.17	83.15	94.19	79.2	82.55	78.33	84.31	46.92			Y(103)	4	1	1	1	4	1	3	1	1	1	1	4	1	1		Z(103)
Y(104)	1	1	1	1	4	1	1	1	1	1	1	1	1	1		Z(104)	105.46	76.06	75.7	83.18	66.39	94.4	53.27	83.62	105.79	79.37	82.92	78.64	84.49	47.59			Y(104)	4	1	1	1	1	1	4	1	1	1	4	4	1	1		Z(104)
Y(105)	1	1	1	1	1	1	1	1	1	1	1	1	1	4		Z(105)	105.55	76.47	76.22	83.84	67.46	94.54	53.54	83.99	106.23	79.55	83.39	78.75	84.74	48.39			Y(105)	1	1	1	1	1	1	4	1	4	3	1	1	1	1		Z(105)
Y(106)	1	1	1	1	1	3	1	1	1	1	1	1	1	1		Z(106)	106.2	76.71	76.31	84.19	67.87	94.65	53.67	84.11	106.35	79.67	83.53	79.19	84.86	49.46			Y(106)	1	1	1	1	1	1	1	1	4	4	1	1	1	1		Z(106)
Y(107)	1	1	1	1	1	4	1	1	1	1	1	1	3	1		Z(107)	106.54	77.23	76.69	84.64	67.99	95.39	53.74	84.94	106.62	79.84	83.98	79.64	84.97	49.57			Y(107)	1	1	3	1	1	1	1	1	1	1	1	1	1	1		Z(107)
Y(108)	1	1	1	1	1	1	1	1	1	1	1	1	4	1		Z(108)	107.26	77.65	77.2	84.74	68.15	107.8	53.99	85.06	106.81	80	84.86	79.93	86.39	49.73			Y(108)	1	1	1	3	1	1	1	1	1	1	1	1	1	1		Z(108)
Y(109)	1	1	1	1	1	1	1	1	1	1	1	4	1	1		Z(109)	107.38	77.76	77.72	85.39	68.27	108.23	54.15	85.4	106.88	80.14	85.36	80.99	95.32	49.85			Y(109)	1	1	4	4	1	1	1	1	1	1	1	1	3	1		Z(109)
Y(110)	1	1	1	1	1	1	1	1	1	1	1	1	1	1		Z(110)	107.54	77.92	78.06	85.51	68.39	108.67	54.48	85.97	107.19	80.56	85.52	81.84	95.68	49.96			Y(110)	1	1	1	1	1	1	1	1	1	1	1	1	4	1		Z(110)
Y(111)	1	3	1	1	1	1	1	1	1	1	1	1	1	1		Z(111)	107.67	78.03	78.19	85.98	68.52	109.08	54.59	87.72	109.32	80.7	85.99	81.92	95.81	50.08			Y(111)	1	1	1	1	1	1	1	1	1	1	1	1	4	1		Z(111)
Y(112)	1	1	1	1	1	1	4	4	1	1	1	1	1	1		Z(112)	107.8	78.74	78.46	86.65	68.65	109.16	55.59	88.79	109.45	81.05	86.2	82.77	96.05	50.39			Y(112)	1	1	2	1	1	1	1	1	1	1	1	3	1	3		Z(112)
Y(113)	1	1	4	1	1	1	1	1	1	1	1	1	1	1		Z(113)	109.97	78.86	79.59	87.01	68.78	109.36	56.99	89.94	109.64	81.22	86.8	83.18	96.45	50.58			Y(113)	1	1	1	1	1	1	1	4	1	1	1	4	1	4		Z(113)
Y(114)	1	4	1	1	1	1	1	1	1	1	1	1	1	1		Z(114)	110.33	79.59	80.22	87.34	69.66	109.72	57.12	90.49	109.87	81.75	87.22	83.25	97.26	50.93			Y(114)	1	1	1	1	1	1	1	1	1	1	1	1	1	4		Z(114)
Y(115)	1	1	1	1	1	1	1	1	1	1	1	1	1	1		Z(115)	111.06	85.73	80.35	87.76	69.97	109.84	57.21	91	110.29	81.92	87.77	83.47	97.39	51.11			Y(115)	1	1	1	1	1	1	1	1	1	1	1	1	1	1		Z(115)
Y(116)	1	1	1	1	1	1	1	1	1	1	1	1	1	1		Z(116)	111.18	85.93	80.48	88.22	70.32	110.26	57.49	92.03	112.61	82.07	87.94	83.8	97.54	51.26			Y(116)	1	1	1	1	1	1	1	1	1	1	1	1	1	1		Z(116)
Y(117)	1	1	1	1	1	1	1	1	1	1	1	1	1	4		Z(117)	111.72	86.26	80.7	88.49	70.45	110.41	57.68	92.17	113.84	82.56	88.25	83.95	97.8	52.19			Y(117)	1	1	1	1	4	1	4	1	1	1	1	1	1	1		Z(117)
Y(118)	1	1	1	1	1	1	1	1	1	1	1	1	1	1		Z(118)	112.14	86.35	81.08	88.93	77.84	110.67	57.75	92.32	114.03	82.77	88.47	84.18	98.16	53.56			Y(118)	1	1	1	1	1	1	4	1	1	1	1	1	1	1		Z(118)
Y(119)	4	1	1	1	1	1	1	1	1	1	3	4	1	1		Z(119)	112.99	86.9	81.19	89.1	78.26	110.86	58.23	92.95	115.62	82.93	88.68	85.39	98.29	53.69			Y(119)	1	1	1	1	1	1	1	1	1	1	1	1	1	1		Z(119)
Y(120)	1	1	1	1	3	1	1	1	1	1	4	1	3	1		Z(120)	113.58	87	81.28	89.59	78.37	111.03	58.65	94.26	115.74	83.06	89.59	86.21	98.4	53.97			Y(120)	1	1	1	1	1	1	1	1	1	1	1	1	1	1		Z(120)
Y(121)	1	1	1	1	1	1	1	1	1	1	4	1	4	1		Z(121)	114.13	87.11	81.62	89.76	78.76	111.49	58.77	94.86	115.87	83.71	98.79	86.38	99.79	54.15			Y(121)	1	1	3	1	1	1	1	1	1	1	1	4	1	1		Z(121)
Y(122)	1	4	1	1	1	1	4	1	1	1	1	1	1	1		Z(122)	114.6	88.79	81.75	90.5	79.11	111.91	59.79	95.24	116.32	83.89	100.43	86.79	109.33	54.24			Y(122)	1	1	1	1	1	1	1	1	1	1	1	1	1	1		Z(122)
Y(123)	1	1	1	1	4	1	1	1	1	1	1	1	1	1		Z(123)	114.64	89.68	81.9	90.87	79.99	112.14	60.67	95.75	116.44	84.08	100.8	86.93	109.73	54.43			Y(123)	1	1	3	1	1	1	1	1	1	1	1	1	1	1		Z(123)
Y(124)	1	1	4	1	1	1	1	1	1	1	1	1	1	1		Z(124)	116.73	89.89	82.99	91.31	97.53	112.75	60.73	96.17	116.88	84.8	100.96	87.62	110.24	54.58			Y(124)	1	4	1	1	1	1	1	1	1	1	1	1	1	1		Z(124)
Y(125)	1	1	1	1	1	1	1	1	1	1	1	1	1	1		Z(125)	116.9	90.01	83.71	91.66	97.69	113.27	60.95	96.31	117.51	84.93	101.24	88.23	110.35	54.7			Y(125)	1	1	4	1	1	3	1	1	1	1	3	1	1	3		Z(125)
Y(126)	1	1	1	1	1	1	1	1	1	1	1	1	1	1		Z(126)	117.15	91.45	84.09	92.45	98.02	113.46	61.6	96.93	119.21	85.05	101.48	88.63	110.53	54.98			Y(126)	1	1	4	1	1	4	1	1	1	1	1	1	1	1		Z(126)
Y(127)	1	1	1	1	1	1	1	1	1	1	1	1	1	1		Z(127)	117.26	91.62	84.23	92.75	98.28	114.24	61.7	97.2	119.45	85.18	101.91	88.78	110.74	55.17			Y(127)	1	1	1	1	4	1	1	1	1	1	4	1	1	1		Z(127)
Y(128)	1	1	1	1	1	1	1	1	1	1	1	4	1	1		Z(128)	117.37	91.84	84.31	93.07	98.55	115.1	61.77	98.36	119.59	86.01	102.18	90.59	110.92	55.36			Y(128)	1	1	1	1	1	1	4	1	1	1	4	1	1	4		Z(128)
Y(129)	1	1	1	1	1	1	1	1	1	1	1	1	1	1		Z(129)	117.8	91.89	84.48	93.54	98.67	115.22	61.95	99	120.03	86.2	102.62	91.2	111.23	55.48			Y(129)	1	1	1	1	1	1	1	1	1	1	4	1	1	1		Z(129)
Y(130)	1	1	1	1	1	1	1	1	1	1	1	1	3	1		Z(130)	117.92	92.14	84.73	94.2	98.97	115.98	62.06	99.62	120.79	86.37	103.07	91.33	111.34	55.59			Y(130)	1	1	1	1	1	1	1	1	1	1	1	1	1	1		Z(130)
Y(131)	1	1	1	1	1	1	1	4	1	1	1	1	1	1		Z(131)	118.65	93.53	84.98	94.83	99.37	116.86	62.43	100.99	120.96	87.51	103.19	91.94	112.24	55.83			Y(131)	1	1	1	3	1	1	1	1	1	1	1	1	1	1		Z(131)
Y(132)	1	1	1	1	4	1	1	1	1	1	1	1	4	1		Z(132)	120.71	93.68	85.23	95.8	100.99	117.58	62.68	102.06	121.08	87.73	103.48	92.2	112.99	56.4			Y(132)	1	1	1	4	1	1	1	1	1	4	1	1	1	1		Z(132)
Y(133)	1	4	1	1	1	1	4	1	1	1	1	1	1	4		Z(133)	121.11	94.19	85.36	96.2	101.69	117.69	63.59	102.13	122.86	87.93	103.72	92.44	123.61	56.99			Y(133)	1	3	1	1	1	1	1	1	4	1	1	1	3	1		Z(133)
Y(134)	1	1	1	1	1	1	1	1	1	1	1	1	1	1		Z(134)	121.27	95.3	85.94	96.84	102.02	118.55	64.83	102.47	123.12	88.08	104.35	92.55	124.38	58.3			Y(134)	1	1	4	1	1	1	1	1	1	1	1	1	4	1		Z(134)
Y(135)	1	1	4	1	1	1	1	1	1	1	1	1	1	1		Z(135)	121.39	95.76	86.59	97.48	102.19	119.31	65.42	102.54	123.29	88.74	105.38	92.67	124.66	58.47			Y(135)	1	1	1	1	1	1	1	1	1	1	1	1	1	1		Z(135)
Y(136)	1	1	1	1	1	1	1	1	1	1	1	1	1	1		Z(136)	121.56	96.96	87.5	97.72	102.31	120.05	65.7	102.78	123.52	88.94	105.52	92.85	125.1	62.68			Y(136)	1	1	1	1	1	1	1	1	1	1	1	1	1	1		Z(136)
Y(137)	1	1	1	1	1	1	1	1	1	1	1	1	1	1		Z(137)	122.04	97.12	87.6	97.85	102.56	120.45	65.99	103.23	123.76	89.34	105.88	92.97	125.26	62.82			Y(137)	4	1	1	1	1	1	1	1	1	1	1	1	1	1		Z(137)
Y(138)	1	1	1	1	1	1	1	1	1	1	1	1	1	1		Z(138)	124.45	97.96	87.75	98.32	102.7	120.66	66.23	103.95	124.18	89.74	106.02	93.36	125.46	63.02			Y(138)	1	1	1	1	1	1	1	1	1	1	1	1	1	4		Z(138)
Y(139)	1	1	1	1	1	1	1	3	1	1	4	1	1	1		Z(139)	124.56	98.14	87.86	98.6	102.95	121.19	66.35	104.06	124.58	90.23	106.59	93.6	125.8	63.13			Y(139)	1	1	1	1	4	4	1	1	1	1	1	1	1	1		Z(139)
Y(140)	1	1	1	1	3	1	1	4	1	1	1	1	1	1		Z(140)	124.93	98.72	87.97	99.11	103.06	121.89	66.5	104.79	124.95	90.36	108.75	93.72	126.16	63.34			Y(140)	1	1	1	1	1	1	4	1	1	1	1	4	1	1		Z(140)
Y(141)	1	1	1	1	1	1	1	1	1	1	1	1	1	1		Z(141)	125.06	98.84	88.07	99.33	103.19	122.63	66.61	122.8	126.83	90.84	108.87	93.86	126.37	63.62			Y(141)	1	4	1	1	1	1	4	4	1	1	1	1	1	1		Z(141)
Y(142)	1	1	1	1	1	1	1	1	1	1	1	4	1	1		Z(142)	125.83	99.53	88.52	99.74	103.51	123.62	66.77	123.15	127.25	91.2	109.01	95.19	126.5	63.81			Y(142)	1	4	4	1	1	1	1	1	1	1	1	1	1	1		Z(142)
Y(143)	1	1	1	1	1	1	1	1	1	1	1	1	1	1		Z(143)	125.97	99.66	88.63	100.21	103.65	123.82	66.91	124.19	127.62	92.01	109.15	95.84	126.63	64.14			Y(143)	1	4	1	1	1	1	1	1	1	1	1	1	1	1		Z(143)
Y(144)	1	3	3	1	1	1	1	1	1	1	1	1	1	3		Z(144)	127.96	99.77	88.74	100.55	104	123.98	67.12	124.54	127.73	92.14	109.41	96.49	126.76	64.25			Y(144)	1	4	1	1	1	1	1	1	1	1	1	1	1	1		Z(144)
Y(145)	1	4	4	1	1	1	4	1	1	1	1	1	1	4		Z(145)	128.39	100.39	89.59	100.98	104.34	124.59	67.99	125.05	128.04	92.31	109.56	96.62	127.08	65.39			Y(145)	1	1	1	1	1	1	1	1	1	1	1	1	1	1		Z(145)
Y(146)	1	4	1	1	4	1	1	1	1	3	1	1	1	1		Z(146)	128.9	100.99	96.77	101.1	104.79	124.79	68.98	125.45	129.88	92.42	109.86	96.83	127.21	71.11			Y(146)	1	1	1	1	1	1	1	1	4	1	1	1	1	1		Z(146)
Y(147)	1	1	1	1	1	1	1	1	1	4	3	1	1	1		Z(147)	129.02	106.77	97	102.88	120.5	126.35	69.16	126.14	130.07	93.59	109.97	97.01	127.33	71.26			Y(147)	1	1	1	1	1	1	1	1	1	1	1	1	1	1		Z(147)
Y(148)	1	1	1	1	1	1	1	1	1	1	4	1	1	1		Z(148)	129.6	107.41	97.4	103.38	120.64	126.92	69.31	126.73	130.31	100.9	110.99	97.14	127.64	71.36			Y(148)	4	1	1	1	1	1	1	1	1	1	1	1	3	1		Z(148)
Y(149)	1	1	1	1	1	1	1	1	3	1	1	1	1	1		Z(149)	129.73	107.55	97.53	104.25	120.97	127.39	69.42	127.23	130.52	101.57	121.82	97.37	127.79	71.56			Y(149)	1	1	1	1	4	1	1	1	1	1	1	1	1	1		Z(149)
Y(150)	3	1	1	3	1	1	1	1	1	1	1	3	1	1		Z(150)	129.84	107.68	97.8	104.46	121.1	128.11	69.54	127.75	130.67	101.72	122.47	97.48	128.29	71.67			Y(150)	1	1	1	1	4	1	1	1	1	1	1	1	1	1		Z(150)
Y(151)	4	1	1	4	1	4	1	1	1	1	1	1	1	1		Z(151)	130.99	107.86	98.04	105.59	121.26	129.59	69.69	128.27	131.1	101.87	122.62	97.66	128.75	72.15			Y(151)	1	1	1	1	1	1	3	1	4	1	1	4	1	1		Z(151)
Y(152)	1	1	1	1	1	1	1	1	1	1	1	1	1	4		Z(152)	140.98	108.03	98.15	111.02	121.61	130.23	69.93	128.89	131.56	102.03	122.86	97.8	129.26	72.79			Y(152)	1	1	1	1	1	1	4	1	1	1	1	1	1	1		Z(152)
Y(153)	1	1	1	1	1	1	1	1	4	1	1	1	1	1		Z(153)	141.56	108.17	99.67	111.31	121.86	130.5	70.22	129.4	132.79	102.25	123.13	98.05	129.39	74.13			Y(153)	1	1	1	1	1	1	4	1	1	1	1	1	1	1		Z(153)
Y(154)	1	1	1	1	1	1	1	3	4	1	1	1	1	1		Z(154)	142.28	108.59	100.21	112.42	123.98	130.61	70.7	129.51	138.79	103.03	123.78	98.21	129.56	74.29			Y(154)	1	1	1	1	1	1	4	1	1	1	1	1	1	1		Z(154)
Y(155)	1	4	1	1	1	1	4	4	1	3	1	4	1	1		Z(155)	142.43	109.19	100.32	112.86	124.41	130.86	71.79	130.19	142.13	103.14	123.92	99.39	129.98	74.68			Y(155)	1	1	1	1	1	1	1	1	1	1	3	1	1	1		Z(155)
Y(156)	1	1	1	1	1	1	1	4	1	4	1	1	1	1		Z(156)	142.53	110.32	100.47	113.21	124.52	131.47	72.87	145.99	142.39	104.19	124.08	106.55	130.1	74.81			Y(156)	1	1	1	1	1	1	1	1	1	1	4	1	3	1		Z(156)
Y(157)	1	1	1	1	1	1	1	1	1	1	1	1	1	1		Z(157)	142.65	110.54	100.8	113.83	124.66	131.56	73.18	147.81	142.95	111.73	124.21	106.71	130.26	74.91			Y(157)	1	1	1	1	1	1	1	1	1	1	1	1	4	4		Z(157)
Y(158)	1	1	1	1	1	1	1	1	4	1	1	1	1	1		Z(158)	142.77	110.68	100.94	113.98	124.78	131.69	73.29	148.24	144.59	112.03	124.71	106.82	130.63	75.02			Y(158)	1	1	1	1	1	1	1	1	1	1	1	1	4	1		Z(158)
Y(159)	1	1	1	1	1	1	1	1	1	1	1	1	1	1		Z(159)	143.04	111.25	102.62	114.36	124.9	132.18	73.58	148.56	145.9	112.21	124.9	107.15	131.75	75.11			Y(159)	1	1	1	1	1	1	1	1	1	1	1	1	1	1		Z(159)
Y(160)	1	1	1	1	3	1	1	1	1	1	1	1	1	1		Z(160)	143.71	111.62	102.89	115.04	125.01	132.51	73.69	149.11	146.02	112.36	125.18	107.43	131.89	75.4			Y(160)	1	1	1	1	1	1	1	1	1	3	1	1	1	1		Z(160)
Y(161)	1	1	1	4	1	3	1	1	1	1	1	1	1	1		Z(161)	144.5	112.53	103.02	116.19	125.22	132.72	73.79	149.55	146.21	112.5	125.34	107.53	132.03	75.58			Y(161)	1	1	3	1	1	1	1	1	1	4	1	1	1	1		Z(161)
Y(162)	1	1	1	4	1	4	1	1	1	1	1	1	1	1		Z(162)	146.7	113.07	103.13	116.79	125.46	133.39	74.05	149.99	146.52	112.8	125.51	107.63	132.18	75.85			Y(162)	1	1	1	1	4	1	4	3	1	1	1	1	1	1		Z(162)
Y(163)	1	1	1	1	4	1	1	1	1	1	1	1	1	1		Z(163)	146.95	113.24	103.25	118.63	126.19	143.34	74.18	150.48	146.96	113.1	125.9	107.74	132.55	76.04			Y(163)	1	1	1	1	1	1	1	4	1	1	1	1	1	1		Z(163)
Y(164)	1	1	1	1	1	1	1	1	1	1	1	4	1	1		Z(164)	147.21	113.38	105.17	119.43	145.62	143.65	74.29	150.98	149.43	113.48	126.67	108.79	132.66	76.19			Y(164)	3	1	1	1	1	1	1	1	1	1	1	4	1	1		Z(164)
Y(165)	1	1	3	1	1	1	1	1	1	1	1	1	1	4		Z(165)	147.33	113.56	105.28	119.73	145.98	144.01	74.4	151.11	149.61	114	126.86	109.61	132.81	77.19			Y(165)	4	1	4	1	1	1	1	1	1	1	1	1	1	1		Z(165)
Y(166)	1	1	1	1	1	1	1	1	1	3	1	1	1	1		Z(166)	147.93	113.73	105.53	120.43	146.11	144.13	75.32	152.17	149.8	114.11	127.91	110.05	133.17	78.84			Y(166)	1	1	1	1	1	1	1	1	1	1	1	1	1	1		Z(166)
Y(167)	1	1	1	1	1	1	4	1	1	4	1	1	1	1		Z(167)	148.05	113.91	105.67	120.58	146.21	144.24	75.99	152.62	150.14	115.39	128.16	110.18	133.43	78.92			Y(167)	1	1	1	1	1	1	1	1	1	1	1	1	1	1		Z(167)
Y(168)	1	4	1	1	1	1	1	1	1	1	1	1	1	1		Z(168)	148.5	114.99	106.18	120.88	146.38	144.5	77.28	153.18	150.33	124.51	128.48	110.61	134.87	79.04			Y(168)	1	1	1	1	1	1	1	1	1	1	1	1	1	1		Z(168)
Y(169)	4	1	1	1	1	1	1	1	3	1	1	1	1	1		Z(169)	149.99	115.8	106.3	121.03	146.52	145.07	77.7	153.49	150.44	124.7	129.16	110.72	134.98	79.15			Y(169)	1	1	1	1	1	1	4	1	1	1	1	1	1	1		Z(169)
Y(170)	1	1	1	1	1	1	1	1	1	1	1	1	1	1		Z(170)	150.77	116.46	106.89	121.99	146.97	145.91	78.18	153.94	150.58	124.87	130.14	110.95	135.11	79.25			Y(170)	1	1	1	1	1	1	1	1	3	1	1	1	1	1		Z(170)
Y(171)	1	1	1	1	4	1	1	1	1	1	1	1	1	1		Z(171)	150.87	116.57	107.22	122.47	148.19	146.02	79.59	154.56	150.7	125.03	130.64	111.4	135.23	79.38			Y(171)	1	1	1	1	4	1	1	4	1	1	1	1	3	1		Z(171)
Y(172)	1	1	4	1	1	3	4	1	1	1	1	1	1	1		Z(172)	150.99	116.8	108.59	122.62	149.05	146.13	80.39	154.96	151.15	125.2	131.26	111.54	135.38	79.52			Y(172)	1	1	1	1	1	1	1	1	4	1	1	1	4	4		Z(172)
Y(173)	1	1	4	1	1	4	1	1	1	1	1	1	1	1		Z(173)	151.23	117.74	116.19	123.36	149.27	146.79	81.16	155.75	151.46	125.54	131.42	113.42	135.57	79.7			Y(173)	1	1	1	1	1	1	1	1	1	1	1	1	1	4		Z(173)
Y(174)	1	1	1	1	1	1	1	1	4	1	1	1	1	1		Z(174)	151.67	118.07	118.03	123.77	149.4	159.65	81.26	156.51	152.79	125.7	131.6	113.55	136.41	79.95			Y(174)	1	1	1	1	1	1	1	1	1	1	1	1	1	1		Z(174)
Y(175)	1	1	1	1	1	1	1	1	1	1	1	1	1	1		Z(175)	151.75	118.26	118.28	123.95	149.67	160.4	81.5	157	163.61	125.89	131.75	114.05	136.84	80.13			Y(175)	1	1	1	1	1	1	1	1	1	1	1	1	1	1		Z(175)
Y(176)	1	1	1	1	1	1	1	1	1	1	1	1	1	4		Z(176)	151.87	118.56	118.54	124.51	149.8	160.5	82.13	157.4	163.97	126.23	132.4	114.48	137.15	81.19			Y(176)	1	1	1	1	1	1	1	1	1	1	1	1	1	1		Z(176)
Y(177)	1	4	1	1	1	1	1	1	1	1	1	1	1	1		Z(177)	152.69	119.99	118.71	124.85	150.15	160.59	82.35	157.52	164.16	126.81	132.73	114.6	137.82	82.69			Y(177)	1	3	1	1	1	1	1	1	1	1	3	1	1	1		Z(177)
Y(178)	4	1	1	1	1	1	1	1	1	3	1	1	3	1		Z(178)	154.19	121	118.88	125.69	150.57	160.73	82.51	158.25	164.32	126.92	132.84	114.8	138.03	82.79			Y(178)	1	1	1	1	1	1	3	1	1	1	4	1	1	1		Z(178)
Y(179)	1	1	1	1	1	1	1	1	1	4	1	1	4	1		Z(179)	154.85	121.23	119.15	126.1	150.69	161.14	82.69	158.82	164.44	128.19	133.32	114.96	138.99	82.91			Y(179)	1	1	4	3	1	1	1	1	1	1	4	1	1	1		Z(179)
Y(180)	1	1	4	1	1	1	1	1	1	1	1	1	1	1		Z(180)	155.4	121.29	120.79	126.62	150.97	161.25	82.96	159.67	164.64	143.13	133.48	116.64	148.93	83.02			Y(180)	1	1	1	4	1	3	1	1	1	1	1	4	1	1		Z(180)
Y(181)	1	1	1	1	4	1	4	1	1	1	1	1	1	1		Z(181)	157.72	121.87	121.39	126.97	151.99	161.36	83.59	160.54	164.77	143.37	133.67	117.22	149.88	83.13			Y(181)	1	4	1	4	1	4	1	3	1	1	1	1	1	1		Z(181)
Y(182)	1	1	1	1	1	1	4	1	1	1	1	1	1	1		Z(182)	158.12	122.49	121.53	127.36	153.1	162.19	84.19	160.89	165.07	143.59	134.4	117.36	149.99	83.39			Y(182)	1	1	1	1	4	4	1	4	1	1	1	1	1	1		Z(182)
Y(183)	1	1	1	1	1	1	1	1	1	1	1	1	1	1		Z(183)	158.53	122.57	121.63	127.81	153.19	162.53	85.61	161.1	165.43	143.74	134.78	117.71	150.14	83.49			Y(183)	1	1	1	1	1	1	1	4	1	1	1	1	1	1		Z(183)
Y(184)	1	1	1	1	1	1	1	1	1	1	1	1	1	1		Z(184)	158.57	122.67	121.72	128.22	153.52	162.8	85.8	161.6	165.55	143.9	134.91	117.84	150.47	83.71			Y(184)	3	1	1	1	1	1	4	1	1	1	1	1	1	1		Z(184)
Y(185)	1	4	1	1	1	1	1	1	1	1	1	3	1	1		Z(185)	159.14	123.99	121.86	129.28	153.65	162.93	85.9	162.06	167.17	144.12	135.1	117.95	150.79	83.82			Y(185)	4	1	1	1	1	1	4	1	1	1	1	1	1	1		Z(185)
Y(186)	1	1	1	1	1	1	1	1	1	1	1	1	1	1		Z(186)	159.27	129.17	122.04	130.03	154.06	163.07	86.23	162.85	167.3	144.49	135.27	118.06	150.9	83.98			Y(186)	1	1	1	1	1	1	1	1	1	1	1	1	1	1		Z(186)
Y(187)	1	1	1	1	1	1	1	3	1	1	1	1	1	1		Z(187)	161.59	129.73	122.29	130.42	154.17	163.23	86.33	162.96	167.45	145	135.58	118.19	151.01	84.28			Y(187)	1	1	1	1	1	1	1	1	4	1	3	1	1	1		Z(187)
Y(188)	1	1	1	1	1	1	1	4	1	1	1	4	1	3		Z(188)	162.01	129.83	122.53	130.86	154.25	163.69	86.52	164.19	167.82	145.3	135.93	119.19	151.65	84.39			Y(188)	1	1	1	1	1	1	1	1	1	1	4	1	1	1		Z(188)
Y(189)	3	1	1	1	1	1	1	4	1	1	1	4	1	1		Z(189)	162.12	130.29	122.83	130.97	154.4	164.33	86.93	180.79	167.94	146	136.12	123.39	151.78	84.55			Y(189)	1	1	1	1	1	1	1	1	1	1	1	1	1	4		Z(189)
Y(190)	1	1	1	1	1	1	1	1	1	1	1	1	1	1		Z(190)	163.16	130.71	124.74	132.34	154.53	164.44	87.04	182.44	168.07	146.14	136.56	124.43	151.91	84.89			Y(190)	1	1	1	1	1	1	1	1	1	1	1	1	1	1		Z(190)
Y(191)	1	1	1	1	4	1	1	1	1	1	1	1	1	1		Z(191)	163.29	133.27	125.02	132.53	156.39	164.88	87.16	182.63	168.42	147.26	136.72	124.66	152.1	85.25			Y(191)	1	1	1	1	1	1	1	1	1	1	1	1	1	1		Z(191)
Y(192)	1	1	1	1	1	1	1	1	1	1	1	1	1	1		Z(192)	163.42	133.61	125.27	132.97	157.31	165.55	87.27	182.94	168.59	147.92	137.19	124.79	152.67	85.37			Y(192)	1	1	1	1	1	1	1	1	1	1	1	3	1	1		Z(192)
Y(193)	4	1	1	1	1	1	1	1	1	3	1	1	1	1		Z(193)	164.39	134.06	125.39	133.26	157.82	166.44	87.48	184.46	170.11	148.03	137.57	124.99	152.98	85.74			Y(193)	1	1	1	1	1	1	1	1	1	1	1	4	1	1		Z(193)
Y(194)	1	1	1	1	1	1	1	1	1	4	4	1	1	1		Z(194)	171.64	134.34	125.51	134.23	157.89	167.25	87.6	184.96	170.41	149.39	138.39	125.7	153.12	85.89			Y(194)	1	1	3	1	4	1	1	1	1	1	1	1	1	1		Z(194)
Y(195)	1	3	1	1	1	1	1	1	1	1	1	1	1	3		Z(195)	172.26	134.45	125.7	134.75	158.21	167.95	87.73	185.43	170.87	155.49	139.59	125.81	153.67	86			Y(195)	1	1	1	1	1	1	4	1	1	1	1	1	1	1		Z(195)
Y(196)	1	1	1	1	4	1	1	1	1	1	1	1	1	4		Z(196)	172.67	134.56	126.15	135.51	159.39	168.06	87.86	185.81	171.11	155.79	140.01	126.08	154.86	86.79			Y(196)	1	1	1	1	1	1	1	4	1	1	1	1	1	1		Z(196)
Y(197)	1	1	1	1	1	1	4	1	1	1	1	4	1	4		Z(197)	172.76	135.29	126.51	136.02	160.48	168.18	88.99	186.61	171.27	155.97	140.37	127.19	155.38	90.19			Y(197)	1	1	1	1	1	1	1	1	1	1	1	4	1	1		Z(197)
Y(198)	1	1	4	1	1	1	1	4	1	1	1	1	1	1		Z(198)	172.86	135.45	127.79	136.17	160.76	169.2	90.03	187.59	171.41	156.5	140.49	128.09	155.52	99.51			Y(198)	1	1	4	1	1	1	1	1	1	1	1	1	1	1		Z(198)
Y(199)	1	1	1	1	1	3	1	1	1	1	1	1	1	1		Z(199)	173.13	135.62	128.25	136.74	160.86	169.31	90.37	188.93	171.6	156.68	140.65	128.23	155.66	99.74			Y(199)	3	1	1	1	1	1	1	1	1	1	1	1	1	1		Z(199)
Y(200)	1	1	1	3	1	4	1	1	1	1	1	1	1	1		Z(200)	173.22	135.82	128.34	136.85	161.32	169.99	90.86	189.49	173.9	156.91	140.91	128.83	155.8	100			Y(200)	1	1	1	1	1	1	1	1	4	1	1	1	1	1		Z(200)
Y(201)	1	1	1	4	1	1	1	1	1	1	1	1	1	1		Z(201)	173.5	136.03	128.46	137.79	161.41	184.67	90.9	190.02	174.03	157.1	141.28	128.95	156.29	100.38			Y(201)	1	1	1	1	1	1	1	1	1	1	4	1	1	1		Z(201)
Y(202)	1	4	1	1	1	1	1	1	1	1	3	1	1	1		Z(202)	174.02	136.99	128.69	143.77	161.5	185.71	91.13	190.09	174.44	157.27	141.49	129.03	156.45	100.53			Y(202)	4	1	1	1	1	1	1	1	1	1	4	1	1	3		Z(202)
Y(203)	1	1	1	1	1	1	1	1	1	1	4	1	1	1		Z(203)	174.32	143.35	128.82	144.28	161.61	185.81	91.23	190.48	174.68	157.75	142.59	129.41	156.63	100.67			Y(203)	1	1	1	1	3	1	1	1	1	1	1	1	1	1		Z(203)
Y(204)	1	1	1	1	1	1	1	1	1	1	1	1	1	1		Z(204)	174.8	143.9	128.92	144.69	161.77	186.13	91.67	190.94	174.84	157.91	152.9	129.58	156.93	100.86			Y(204)	1	1	1	1	4	3	1	1	1	1	1	1	1	1		Z(204)
Y(205)	1	1	1	1	1	1	1	1	1	1	1	1	1	1		Z(205)	177.07	144.07	129.25	145.09	161.88	186.24	91.86	191.57	174.96	158.93	153.08	129.99	157.08	101.23			Y(205)	1	1	1	1	1	4	1	1	1	1	1	3	3	1		Z(205)
Y(206)	1	1	1	1	3	1	1	1	1	1	1	1	1	4		Z(206)	177.29	145.91	129.51	145.19	161.99	186.35	91.98	192.12	176.47	159.05	153.47	130.32	157.43	101.99			Y(206)	1	1	1	1	1	4	1	1	1	1	1	1	4	1		Z(206)
Y(207)	1	1	1	1	1	1	3	1	1	1	1	3	1	1		Z(207)	177.41	146.19	129.64	146.58	162.22	186.65	92.09	192.82	176.61	159.45	153.61	130.43	157.71	103.28			Y(207)	1	1	1	1	1	1	1	1	1	1	1	1	1	1		Z(207)
Y(208)	1	1	1	1	4	1	1	1	1	1	1	4	1	1		Z(208)	178	146.36	131.22	146.77	163.79	186.76	92.23	193.02	177.24	159.63	153.87	131.59	158.16	103.46			Y(208)	1	3	1	1	1	1	4	1	1	3	1	1	1	1		Z(208)
Y(209)	1	1	1	1	1	1	1	1	1	1	1	4	4	1		Z(209)	178.53	146.46	131.68	147.2	179.01	186.87	92.35	193.44	177.36	159.84	155.36	135.39	159.39	103.57			Y(209)	1	1	4	1	1	1	1	1	1	4	1	4	1	1		Z(209)
Y(210)	1	1	1	1	1	1	1	1	1	1	1	1	1	1		Z(210)	178.91	147.16	131.96	147.9	179.14	187.27	92.48	193.89	177.74	160.41	155.48	136.04	162.13	103.68			Y(210)	1	1	1	1	1	1	1	1	3	1	1	4	1	3		Z(210)
Y(211)	1	1	1	1	1	1	1	3	1	1	1	1	1	1		Z(211)	181.13	147.28	132.08	148.4	179.28	187.45	92.81	194	178.35	160.65	155.61	136.21	162.65	103.79			Y(211)	1	4	1	1	4	1	1	1	4	1	1	1	1	1		Z(211)
Y(212)	1	1	1	1	1	1	1	4	1	1	1	1	1	1		Z(212)	181.37	147.4	132.31	148.52	179.49	187.71	92.98	194.79	178.59	161.11	155.98	136.4	162.77	103.92			Y(212)	1	1	1	1	1	1	1	1	4	1	3	1	1	4		Z(212)
Y(213)	1	1	1	1	4	1	1	1	1	1	1	1	1	1		Z(213)	181.6	147.54	133.52	148.92	180.79	188.36	93.13	220.29	180.34	162.29	156.56	136.51	163.05	104.04			Y(213)	1	1	1	1	1	1	1	1	1	1	4	1	1	4		Z(213)
Y(214)	1	1	1	1	1	1	3	1	1	1	1	4	1	1		Z(214)	181.89	147.73	133.63	149.1	181.74	188.95	93.24	221.15	180.7	162.58	156.92	137.59	163.15	104.16			Y(214)	1	1	1	1	1	1	1	3	1	1	1	1	1	1		Z(214)
Y(215)	1	1	1	1	1	3	1	1	1	1	1	1	1	1		Z(215)	182.48	148.37	134.29	149.55	181.92	189.06	93.52	221.67	181.01	162.79	157.08	138.18	163.27	104.3			Y(215)	1	1	1	1	1	1	1	4	1	1	1	1	1	1		Z(215)
Y(216)	1	4	4	1	1	4	4	1	3	1	1	1	1	1		Z(216)	184.95	149.39	135.39	149.83	182.04	189.59	94.19	222.22	181.12	162.94	157.44	138.41	163.43	104.43			Y(216)	1	1	1	1	1	1	1	1	1	1	1	1	1	1		Z(216)
Y(217)	1	1	1	1	1	4	4	1	1	1	1	1	1	1		Z(217)	185.19	150.31	136.06	150.83	182.37	202.59	99.19	222.93	181.24	163.32	157.58	138.5	163.74	104.58			Y(217)	1	1	1	1	1	1	1	1	1	1	1	4	1	1		Z(217)
Y(218)	1	1	1	1	1	1	4	1	1	1	1	1	1	1		Z(218)	185.47	150.41	136.16	151.23	182.67	203.4	113.79	223.01	181.91	164.05	157.81	138.61	163.89	104.79			Y(218)	1	1	1	1	4	1	4	1	1	1	1	1	1	1		Z(218)
Y(219)	1	1	1	1	1	1	4	1	1	1	1	1	1	4		Z(219)	185.85	150.74	136.26	151.34	182.83	204.07	114.39	223.6	182.02	164.19	158.29	139.14	164.3	105.59			Y(219)	1	1	1	1	1	1	1	1	1	1	1	1	1	1		Z(219)
Y(220)	1	1	1	1	4	1	1	1	4	1	1	1	1	1		Z(220)	186.07	151.08	136.45	151.71	183.99	204.18	116.23	224.11	183.19	164.35	158.94	139.25	164.64	107.42			Y(220)	1	1	1	1	1	1	1	1	1	1	1	1	1	1		Z(220)
Y(221)	1	1	1	1	1	1	1	1	1	1	1	1	1	1		Z(221)	186.33	151.21	136.53	152.05	185.55	204.28	116.44	224.44	193.8	165.45	159.1	139.35	164.76	107.56			Y(221)	1	1	1	1	1	1	1	1	1	1	3	1	1	1		Z(221)
Y(222)	1	1	1	1	1	1	1	1	1	1	1	1	1	1		Z(222)	186.47	151.31	136.7	152.29	186.05	204.62	116.58	225.07	194.23	165.59	159.3	139.47	164.88	107.8			Y(222)	1	1	1	1	1	1	1	1	1	1	4	1	1	1		Z(222)
Y(223)	1	4	1	1	1	1	1	1	1	1	1	4	1	1		Z(223)	186.73	152.59	137.01	152.81	186.17	204.7	116.85	225.99	194.47	166.06	159.68	140.79	165.03	107.91			Y(223)	1	1	1	4	1	1	1	1	1	1	1	1	1	1		Z(223)
Y(224)	1	1	1	1	1	1	1	1	1	1	1	1	1	1		Z(224)	186.89	154.16	137.43	153.25	186.38	205.22	117	226.43	195.23	166.22	159.8	141.37	165.4	108.2			Y(224)	1	1	1	1	1	1	1	1	1	1	1	1	1	1		Z(224)
Y(225)	1	1	1	1	1	1	1	1	1	1	1	1	1	1		Z(225)	187.63	154.94	137.58	153.72	186.69	206.25	117.46	227.12	195.39	167.54	159.98	141.52	165.57	108.28			Y(225)	4	1	1	1	1	3	1	1	1	1	1	1	1	1		Z(225)
Y(226)	1	1	3	1	1	1	4	1	1	1	1	1	1	1		Z(226)	188.19	155.04	137.69	154.39	186.84	206.5	117.99	228.19	195.49	167.65	160.5	141.73	165.79	108.37			Y(226)	1	1	4	1	1	4	4	1	1	1	1	1	1	4		Z(226)
Y(227)	1	1	4	1	1	1	1	4	1	1	1	1	3	1		Z(227)	190.63	155.15	138.59	154.61	186.99	206.84	118.96	229.19	196.07	168.06	160.94	141.86	165.9	108.48			Y(227)	1	1	1	1	1	4	1	1	1	1	1	3	1	1		Z(227)
Y(228)	1	1	4	1	1	1	1	1	1	1	1	1	4	1		Z(228)	190.88	155.27	144.59	155.09	187.11	206.95	119.05	230.24	197.67	168.32	161.56	142.05	166.79	108.74			Y(228)	1	1	1	1	1	1	1	1	1	1	1	1	1	1		Z(228)
Y(229)	1	1	1	1	1	1	1	1	3	1	1	1	1	1		Z(229)	191.17	157.39	146.23	156.5	187.28	207.52	119.14	230.32	197.78	168.47	161.75	142.14	176.57	109.14			Y(229)	1	1	1	1	1	1	1	1	1	1	1	4	1	1		Z(229)
Y(230)	1	1	1	1	1	1	1	1	1	1	1	1	1	1		Z(230)	191.32	157.71	146.45	158.83	187.4	207.71	119.34	230.95	198.36	168.58	161.91	142.24	177.18	109.26			Y(230)	1	1	1	1	1	1	1	1	1	1	1	1	1	1		Z(230)
Y(231)	1	1	1	1	1	1	1	1	1	1	1	1	1	1		Z(231)	191.85	158.45	146.67	159.11	187.54	208.18	119.52	231.44	198.47	169.42	162.1	142.42	177.28	109.37			Y(231)	1	1	1	1	1	1	1	1	1	1	1	1	1	1		Z(231)
Y(232)	1	3	1	1	4	1	1	1	1	1	1	1	1	1		Z(232)	192.12	158.56	146.82	159.94	188.79	208.4	119.76	232.07	198.9	169.62	162.24	142.62	177.42	109.5			Y(232)	1	1	1	1	1	1	1	1	3	1	1	1	1	1		Z(232)
Y(233)	1	1	1	1	1	3	1	1	1	1	1	1	1	1		Z(233)	192.79	158.76	146.97	160.46	189.48	208.51	120.19	232.59	199.25	169.74	163.27	142.73	177.79	109.67			Y(233)	1	1	1	1	4	1	1	1	1	1	1	1	1	1		Z(233)
Y(234)	1	1	1	1	1	4	1	1	1	1	1	1	1	1		Z(234)	192.95	159.1	147.12	162.27	189.66	209.19	120.31	233.06	199.37	170.15	163.46	143.14	177.99	109.89			Y(234)	1	1	1	1	4	1	1	1	1	1	1	1	1	1		Z(234)
Y(235)	1	1	1	1	1	4	1	1	4	1	1	1	1	3		Z(235)	195.02	159.23	147.38	162.42	190.29	220.19	120.43	233.67	200.39	170.88	163.61	144.63	178.23	110			Y(235)	3	1	1	3	1	1	1	3	1	1	1	1	1	1		Z(235)
Y(236)	1	1	1	1	1	1	1	3	4	1	1	1	1	1		Z(236)	195.33	159.34	147.5	162.82	190.5	220.9	120.54	233.78	206.79	171.37	163.91	144.87	178.34	110.26			Y(236)	1	1	1	4	1	1	1	4	4	1	1	1	1	1		Z(236)
Y(237)	3	1	1	1	1	1	1	4	1	1	1	1	1	4		Z(237)	195.54	159.59	147.68	163.86	190.61	221.39	120.97	234.39	217.87	171.59	164.22	145.39	178.49	110.79			Y(237)	4	1	1	1	1	1	1	1	4	1	1	1	1	1		Z(237)
Y(238)	1	4	1	1	1	1	4	1	1	1	1	1	1	4		Z(238)	196.49	160.19	147.94	164.01	190.71	221.48	121.59	254.58	218.15	171.83	164.88	146.97	179.29	113.99			Y(238)	1	1	1	1	1	1	1	1	4	1	1	1	1	1		Z(238)
Y(239)	4	1	1	1	1	1	1	1	1	1	1	1	1	1		Z(239)	197.79	165.4	148.06	164.49	190.81	221.57	122.55	254.93	218.22	171.96	165.03	147.36	179.43	115.68			Y(239)	1	1	1	1	1	1	1	1	1	1	1	1	1	1		Z(239)
Y(240)	1	1	1	1	1	1	1	1	1	1	1	3	1	1		Z(240)	204.02	165.8	148.32	164.86	190.97	221.7	122.66	255.38	218.54	172.39	166.29	147.47	179.59	115.84			Y(240)	1	1	1	1	1	1	4	1	1	1	4	1	3	1		Z(240)
Y(241)	1	1	4	1	1	1	1	1	1	3	1	1	1	1		Z(241)	204.51	165.95	149.19	166	191.13	221.97	122.84	255.91	218.76	172.6	166.42	147.7	179.83	115.99			Y(241)	1	1	1	1	1	1	1	1	1	1	1	1	4	1		Z(241)
Y(242)	1	1	1	1	1	1	1	1	1	4	1	1	1	1		Z(242)	205.03	166.35	150.01	166.42	191.24	222.18	122.95	256.56	220.62	173.99	167.42	147.9	179.95	116.24			Y(242)	1	1	1	1	1	1	1	1	1	3	1	1	1	1		Z(242)
Y(243)	1	1	1	3	4	1	1	1	1	1	1	3	1	1		Z(243)	205.1	166.95	150.07	166.53	192.39	222.38	123.25	256.99	220.9	182.08	167.61	148.01	180.09	116.32			Y(243)	1	1	1	1	1	1	1	1	1	4	1	1	1	4		Z(243)
Y(244)	4	1	1	4	1	1	1	1	1	1	1	1	1	1		Z(244)	206.39	167.23	150.26	167.39	193.08	222.5	123.47	257.56	221.38	182.32	167.79	148.21	180.23	116.42			Y(244)	1	1	1	1	1	1	1	1	1	1	1	3	1	1		Z(244)
Y(245)	1	4	1	1	1	1	1	1	1	1	1	1	1	1		Z(245)	207.01	167.79	150.4	174.21	193.5	222.81	123.8	258.34	222.09	182.48	167.98	148.34	180.42	116.51			Y(245)	1	1	1	1	1	1	1	1	1	1	1	1	1	1		Z(245)
Y(246)	1	4	1	1	1	1	3	3	1	1	1	1	1	1		Z(246)	207.34	168.19	150.8	174.39	193.92	223.11	123.91	258.45	223.83	182.66	168.13	148.48	180.69	116.7			Y(246)	1	1	1	1	1	1	1	1	4	1	1	4	1	1		Z(246)
Y(247)	1	1	1	1	4	1	1	4	1	1	1	1	1	4		Z(247)	207.5	169.44	150.91	174.96	195.19	223.78	124.07	259.39	223.99	183	168.43	148.87	181.08	118.19			Y(247)	1	1	3	1	1	1	1	3	4	1	1	1	1	1		Z(247)
Y(248)	1	1	1	1	1	1	1	4	1	1	1	4	1	1		Z(248)	207.69	169.77	151.07	175.27	196.05	223.98	124.31	279.99	224.43	183.52	168.74	149.99	181.62	119.38			Y(248)	1	1	1	1	4	1	1	4	1	1	1	1	1	1		Z(248)
Y(249)	1	1	1	1	1	1	4	1	1	1	1	4	1	1		Z(249)	207.79	169.89	151.19	175.82	196.35	224.57	124.79	281.61	224.55	183.69	169.21	154.99	182.1	119.51			Y(249)	1	1	4	1	1	1	4	4	1	1	1	1	1	1		Z(249)
Y(250)	4	1	1	1	1	1	4	1	1	1	3	4	1	1		Z(250)	209.19	170.14	151.36	176.3	196.87	224.68	131.19	281.92	224.82	183.86	169.42	161.99	182.38	119.64			Y(250)	1	1	1	1	1	1	1	1	1	1	1	1	1	1		Z(250)
Y(251)	1	1	4	1	1	1	4	1	1	1	4	4	1	1		Z(251)	210.98	170.27	152.39	176.99	196.98	225.21	131.59	282.31	226.55	184.51	170.39	163.59	182.62	119.8			Y(251)	1	1	1	1	1	1	1	1	1	1	1	1	1	1		Z(251)
Y(252)	1	1	4	1	1	1	1	1	1	1	1	1	3	1		Z(252)	211.24	170.41	152.79	177.42	197.11	225.61	132.27	282.78	226.7	184.67	181.31	167.16	182.73	119.91			Y(252)	1	1	1	1	1	1	1	1	1	1	1	1	1	1		Z(252)
Y(253)	1	1	1	1	1	1	1	1	1	1	1	1	4	1		Z(253)	211.7	170.54	153.32	177.91	197.59	225.9	132.4	283.21	227.29	184.82	181.86	167.66	183.59	120			Y(253)	1	1	1	1	1	1	1	1	1	1	1	1	1	1		Z(253)
Y(254)	1	1	1	1	1	1	1	1	1	1	1	1	1	1		Z(254)	212.14	170.7	153.4	178.7	197.77	226.23	132.47	284.04	227.46	185.2	181.96	168.17	195.48	120.1			Y(254)	1	1	1	1	1	1	1	1	1	1	1	1	1	1		Z(254)
Y(255)	1	1	1	1	1	1	1	1	1	1	1	1	1	1		Z(255)	212.24	170.83	153.57	179.32	198.18	226.83	132.92	284.57	230.17	185.35	182.41	168.51	196.17	120.25			Y(255)	1	1	1	1	1	1	1	1	3	3	1	4	1	1		Z(255)
Y(256)	1	1	1	1	4	1	1	1	1	1	1	1	1	1		Z(256)	212.43	171.49	153.64	179.43	199.19	227.54	133.11	285.09	230.35	185.62	182.8	168.68	196.31	120.41			Y(256)	1	3	1	1	1	1	4	1	1	4	1	1	1	1		Z(256)
Y(257)	1	1	1	1	1	1	1	1	1	1	1	1	1	1		Z(257)	212.78	171.6	153.96	179.86	200.23	227.77	133.41	285.78	230.79	186.24	182.95	168.96	196.67	120.69			Y(257)	1	4	1	1	1	1	1	1	1	1	1	1	1	1		Z(257)
Y(258)	1	1	1	1	1	1	1	1	1	1	1	1	1	1		Z(258)	214.72	171.72	154.06	180.21	200.57	228.48	133.65	286.32	231.17	186.72	183.11	170.94	197.01	120.8			Y(258)	1	1	1	1	4	3	1	1	4	1	3	1	1	4		Z(258)
Y(259)	1	4	1	1	1	1	1	1	1	1	1	1	1	1		Z(259)	214.83	172.59	154.32	180.62	200.86	229.44	133.78	286.72	231.37	187	183.35	171.09	197.12	121.22			Y(259)	1	1	1	1	1	4	1	1	4	1	4	1	1	1		Z(259)
Y(260)	1	1	4	1	1	1	1	3	1	1	1	1	1	1		Z(260)	215.59	173.73	155.59	180.77	200.98	229.77	134.12	286.83	233.36	187.65	183.53	171.2	197.31	121.33			Y(260)	1	1	1	1	1	1	1	1	1	1	1	1	1	1		Z(260)
Y(261)	1	1	1	1	1	1	1	4	1	1	3	1	1	1		Z(261)	217.33	174.05	156.8	181.55	201.2	229.9	134.36	287.59	233.62	187.82	183.64	171.78	197.53	121.52			Y(261)	1	1	1	1	1	1	1	1	1	1	1	4	1	1		Z(261)
Y(262)	1	1	1	1	1	1	1	4	1	1	4	1	1	1		Z(262)	217.44	174.45	156.95	182.01	201.44	230.03	134.56	304.99	233.88	187.96	184.79	172.16	197.65	121.73			Y(262)	1	1	1	1	1	1	1	1	1	1	1	1	1	1		Z(262)
Y(263)	1	1	1	1	1	1	1	1	1	1	4	1	1	1		Z(263)	217.78	175.11	157.41	182.3	201.74	230.16	134.68	307.01	234	188.45	196.19	172.43	197.83	121.86			Y(263)	1	1	1	1	1	1	1	1	1	1	1	1	1	1		Z(263)
Y(264)	1	4	1	1	1	1	1	1	1	1	1	4	1	1		Z(264)	218.32	176.19	157.49	182.63	202.27	230.47	135.2	307.42	234.35	189.14	197.2	173.99	198	122.06			Y(264)	1	1	3	1	1	1	1	1	1	1	1	1	1	1		Z(264)
Y(265)	1	1	4	1	1	1	1	1	1	1	1	1	1	4		Z(265)	218.44	176.69	158.79	182.78	203.06	231.02	135.52	308.1	236.36	189.28	197.42	174.49	198.3	122.79			Y(265)	1	1	1	1	1	1	1	1	1	1	1	1	1	1		Z(265)
Y(266)	1	1	1	1	1	1	4	1	1	1	1	1	1	1		Z(266)	220.22	176.86	159.38	183.41	203.43	231.13	135.99	308.34	236.93	189.88	198.31	174.81	198.79	124.2			Y(266)	1	1	1	1	1	1	1	1	1	1	1	1	1	1		Z(266)
Y(267)	1	1	1	1	1	1	1	1	1	1	1	1	1	1		Z(267)	220.63	177.4	159.5	184.04	205.66	231.81	136.91	308.68	237.19	190.09	198.45	174.93	198.95	124.31			Y(267)	1	1	1	3	1	1	1	1	4	1	1	1	1	1		Z(267)
Y(268)	1	1	1	1	1	1	1	1	3	1	1	1	1	1		Z(268)	220.88	177.56	159.58	184.67	205.94	232.69	137.59	308.77	237.3	191.13	199.48	175.01	199.85	124.43			Y(268)	1	1	1	4	1	1	1	1	1	1	1	1	1	1		Z(268)
Y(269)	1	1	1	1	1	1	1	1	1	1	1	1	1	1		Z(269)	220.99	177.7	159.8	185.21	206.16	233.35	137.68	309.14	237.72	192.01	199.81	175.36	199.96	124.55			Y(269)	1	1	4	1	1	1	1	1	1	1	1	4	1	1		Z(269)
Y(270)	1	1	1	1	1	1	1	1	4	1	1	1	1	1		Z(270)	221.46	178.05	160.08	185.61	206.57	234.01	138	309.66	238.79	192.23	200.64	175.59	200.1	124.68			Y(270)	1	1	1	1	4	1	1	1	1	1	1	1	1	1		Z(270)
Y(271)	1	1	1	1	1	1	1	1	4	1	1	1	1	1		Z(271)	223.26	179.27	160.24	185.96	206.69	234.12	138.14	310.15	249.79	192.4	201.14	175.74	200.29	124.8			Y(271)	1	1	1	1	1	1	3	1	1	1	1	1	1	1		Z(271)
Y(272)	1	1	4	1	1	1	1	1	1	1	1	1	1	1		Z(272)	223.67	179.45	160.99	186.8	206.97	235.5	138.2	310.65	251.95	193.89	201.61	176.06	200.41	124.92			Y(272)	1	1	1	1	1	1	1	1	1	1	1	1	1	1		Z(272)
Y(273)	1	1	1	1	1	1	1	3	1	1	3	1	1	1		Z(273)	224.25	179.64	162.19	187.44	207.45	235.64	138.47	310.76	252.26	194.45	201.72	176.19	200.69	125.14			Y(273)	1	1	1	1	1	1	1	1	1	1	1	1	1	1		Z(273)
Y(274)	1	1	1	1	1	1	1	4	1	1	4	1	1	1		Z(274)	224.41	179.78	162.48	187.99	207.56	236.48	138.89	311.99	252.68	194.58	202.59	176.3	200.82	125.29			Y(274)	1	1	1	1	1	4	4	4	1	1	1	1	1	1		Z(274)
Y(275)	1	3	1	1	1	1	1	4	1	1	1	4	1	1		Z(275)	224.53	179.89	162.69	188.66	208.32	237.23	139.02	312.99	252.78	194.75	216.09	177.39	200.98	125.4			Y(275)	1	4	1	1	1	1	4	1	1	1	1	1	4	1		Z(275)
Y(276)	1	1	4	1	1	1	1	4	1	4	1	1	1	1		Z(276)	224.67	180.06	163.99	190.03	210.37	237.41	139.53	335.19	253.09	195.79	216.22	178.3	201.27	125.52			Y(276)	1	1	1	1	1	1	1	1	1	1	1	4	1	1		Z(276)
Y(277)	1	3	1	1	1	3	1	1	1	1	1	1	1	1		Z(277)	226.98	180.17	165.74	190.62	210.82	237.52	139.87	337.71	254.87	197.2	216.6	178.63	201.54	125.7			Y(277)	4	1	1	1	1	1	1	1	1	1	1	1	1	4		Z(277)
Y(278)	1	4	1	1	1	4	1	1	1	1	1	1	1	1		Z(278)	227.11	180.99	165.83	190.88	210.95	238.19	140.07	338.02	254.96	197.82	216.98	178.86	201.7	125.81			Y(278)	1	1	1	3	1	1	1	1	1	1	1	1	1	1		Z(278)
Y(279)	1	4	1	1	3	1	3	1	1	1	1	1	1	1		Z(279)	227.41	184.59	165.95	191.12	211.06	251.35	140.18	338.53	255.39	198.23	217.18	179.02	202.04	125.95			Y(279)	1	1	1	4	1	1	1	1	1	1	1	1	1	1		Z(279)
Y(280)	1	1	1	1	1	1	4	1	4	1	1	1	1	1		Z(280)	227.54	212.77	166.04	191.69	211.68	251.65	140.79	339.2	256.59	198.39	217.71	179.3	202.48	126.06			Y(280)	1	1	1	1	1	1	1	1	1	1	1	1	1	1		Z(280)
Y(281)	1	1	1	1	1	1	4	1	1	1	1	1	1	1		Z(281)	227.66	213.29	166.15	192.17	212.01	251.99	148.39	339.66	257.43	198.59	217.84	179.42	202.62	126.6			Y(281)	1	1	1	1	3	1	1	1	1	1	1	1	1	1		Z(281)
Y(282)	1	1	1	1	3	1	1	1	1	1	1	1	1	1		Z(282)	229.38	213.57	166.23	192.62	212.12	252.09	149.64	339.78	257.54	198.81	218.34	179.56	203.26	126.71			Y(282)	1	1	1	1	1	1	1	1	1	1	1	1	1	1		Z(282)
Y(283)	1	1	1	1	1	1	1	1	1	1	1	3	1	1		Z(283)	229.8	213.89	166.44	192.9	212.45	252.39	149.85	340.3	257.97	199.47	218.48	179.67	203.41	127.05			Y(283)	1	4	1	1	4	1	1	1	1	1	1	1	1	1		Z(283)
Y(284)	1	1	1	1	1	1	1	1	1	1	1	4	1	1		Z(284)	229.92	214.02	166.56	193.03	212.79	253.05	150.03	341.23	258.19	199.73	218.84	180.79	203.66	127.16			Y(284)	1	1	1	1	1	1	1	1	1	1	1	1	1	1		Z(284)
Y(285)	1	1	1	1	1	1	1	1	1	1	1	1	1	4		Z(285)	230.03	214.23	166.69	193.89	213.05	253.19	150.1	341.82	258.26	200.01	218.98	186.27	203.8	127.79			Y(285)	1	1	1	1	1	1	1	1	1	1	1	1	1	1		Z(285)
Y(286)	1	1	1	1	1	1	1	1	1	1	1	1	1	1		Z(286)	230.14	214.34	166.99	194.37	213.16	253.53	150.24	342.33	258.56	200.9	219.28	186.69	204.16	129.44			Y(286)	1	1	1	1	1	1	1	1	1	1	1	1	3	1		Z(286)
Y(287)	1	1	1	1	4	1	1	1	1	1	1	1	1	1		Z(287)	230.26	214.45	167.16	195.02	214.19	253.74	150.48	342.85	258.68	201.33	219.61	186.82	204.27	129.59			Y(287)	1	1	1	1	1	1	1	1	1	1	1	1	4	3		Z(287)
Y(288)	1	1	1	1	4	1	1	1	1	1	1	4	1	1		Z(288)	230.62	214.65	168.67	196.92	218.79	253.95	151.21	343.52	258.8	201.65	220.2	187.79	204.42	129.71			Y(288)	1	1	1	3	1	1	4	1	1	1	3	1	1	1		Z(288)
Y(289)	4	1	1	1	1	1	4	1	1	1	3	1	1	1		Z(289)	231.39	214.81	168.78	197.43	246.89	254.34	152.19	344.01	259.38	202.16	220.31	188.56	204.57	129.82			Y(289)	1	1	1	4	1	1	1	1	1	1	4	1	1	1		Z(289)
Y(290)	1	3	1	1	1	1	1	1	1	1	4	1	1	1		Z(290)	232.15	214.92	169.1	197.71	247.27	254.93	158.14	344.17	259.79	202.42	221.79	189.04	205.04	129.92			Y(290)	3	1	1	4	1	3	1	1	1	1	4	1	1	1		Z(290)
Y(291)	1	1	1	3	1	1	1	1	4	1	4	1	1	1		Z(291)	232.36	215.49	169.26	197.92	248.32	255.49	158.53	344.99	260.79	203.09	233.39	189.21	205.22	130.04			Y(291)	1	1	3	1	1	4	1	1	4	1	1	1	1	3		Z(291)
Y(292)	1	1	1	4	1	1	1	3	1	1	1	1	1	1		Z(292)	232.74	215.61	169.47	198.99	250.67	255.68	158.63	345.1	261.88	203.36	235.7	189.81	205.37	130.15			Y(292)	1	1	1	1	1	1	1	1	1	1	1	1	1	1		Z(292)
Y(293)	1	1	1	1	1	1	1	4	1	1	1	1	1	1		Z(293)	232.86	215.72	169.75	206.72	250.89	256.13	158.74	345.79	262.01	203.7	235.84	190	205.54	130.35			Y(293)	4	1	1	1	1	1	1	1	1	1	1	1	1	1		Z(293)
Y(294)	1	4	1	1	1	1	1	4	1	1	1	1	1	1		Z(294)	232.91	216.59	169.86	206.81	251.03	256.36	159.09	362.39	262.61	204.2	236.1	190.1	205.97	130.58			Y(294)	1	1	1	1	1	1	1	1	1	1	1	1	1	1		Z(294)
Y(295)	1	1	4	1	1	1	1	1	1	1	1	4	1	1		Z(295)	234.46	224.91	171.19	207.36	251.15	257.04	159.28	363.48	262.71	205.16	236.23	191.19	206.17	130.71			Y(295)	1	3	1	1	1	1	1	1	1	1	1	1	1	1		Z(295)
Y(296)	1	1	4	1	1	1	1	1	1	3	1	1	1	1		Z(296)	234.64	225.09	171.79	207.5	251.49	257.65	159.4	363.67	262.82	205.37	236.5	191.96	206.59	130.82			Y(296)	1	4	1	1	1	1	4	4	1	1	1	1	1	1		Z(296)
Y(297)	1	1	1	1	4	1	1	1	1	4	1	1	1	1		Z(297)	234.75	225.24	172.81	208.05	252.79	257.76	159.56	364.23	263.07	206.79	236.75	192.17	206.76	131.01			Y(297)	1	1	4	1	3	1	1	1	1	1	1	1	1	1		Z(297)
Y(298)	1	1	1	1	1	1	1	1	1	1	1	1	1	1		Z(298)	235.43	225.53	172.91	208.27	253.48	257.88	159.76	364.9	263.22	215.97	240.37	192.38	207.04	131.45			Y(298)	1	1	1	1	1	1	1	1	1	1	1	4	1	1		Z(298)
Y(299)	1	1	1	1	1	1	4	1	1	1	1	1	1	1		Z(299)	237.57	225.92	173.03	208.59	253.6	258.02	160.39	365.47	263.58	216.2	240.55	192.48	207.21	131.63			Y(299)	1	1	1	1	1	1	1	1	1	1	1	1	1	1		Z(299)
Y(300)	1	1	1	3	1	1	4	1	1	1	1	1	3	1		Z(300)	237.89	227.61	173.62	208.7	253.86	258.56	161.39	366.63	263.71	217.12	240.86	192.6	207.42	131.75			Y(300)	1	1	1	3	1	1	1	1	1	1	1	1	1	1		Z(300)
Y(301)	1	1	1	4	1	1	1	1	1	1	1	1	4	1		Z(301)	238.02	228.98	173.72	209.59	253.99	259.18	161.83	367.29	264.1	217.32	241.03	192.68	209.19	131.87			Y(301)	1	1	1	4	1	1	1	1	1	1	1	1	1	1		Z(301)
Y(302)	1	1	1	1	1	1	1	1	1	1	1	1	1	1		Z(302)	238.28	229.33	173.85	215.53	254.41	259.38	161.92	367.83	265.58	217.58	241.2	192.78	221.78	132.25			Y(302)	1	1	1	1	1	1	1	1	4	1	1	1	1	1		Z(302)
Y(303)	3	1	4	1	1	4	1	1	1	1	1	3	1	1		Z(303)	238.49	229.51	174.79	216.21	254.53	260.19	162.63	368.32	266.24	217.99	241.53	192.89	222.12	132.42			Y(303)	1	1	1	1	1	1	1	1	1	3	1	1	1	4		Z(303)
Y(304)	4	4	1	1	1	1	1	1	1	1	1	1	1	4		Z(304)	239.99	230.39	175.56	216.75	254.86	266.48	163.12	369.05	266.52	218.27	241.78	193.04	222.26	133.59			Y(304)	1	1	1	1	1	3	1	1	1	4	1	1	1	4		Z(304)
Y(305)	1	1	1	1	4	1	1	1	1	1	1	1	1	1		Z(305)	249.02	231.3	175.66	216.9	255.99	266.74	163.24	369.92	266.73	219.22	242.07	193.16	222.5	135.46			Y(305)	1	1	1	1	3	4	1	1	1	1	1	1	1	1		Z(305)
Y(306)	1	1	1	1	1	1	1	1	1	1	1	1	1	1		Z(306)	249.13	231.69	175.86	217.05	256.67	267	163.55	370.5	267.49	219.65	242.77	193.38	223.02	135.75			Y(306)	1	1	1	1	1	4	1	1	1	1	1	1	1	1		Z(306)
Y(307)	1	1	1	1	1	1	1	1	4	1	1	1	1	1		Z(307)	249.42	232.33	175.98	217.47	256.9	267.08	163.69	370.89	268.59	220.18	242.9	193.54	223.82	135.83			Y(307)	1	1	1	1	4	1	1	1	1	1	1	1	1	1		Z(307)
Y(308)	1	1	1	1	1	1	4	1	1	1	1	4	1	1		Z(308)	249.65	232.45	176.08	217.77	257.04	267.42	164.39	371.49	269.65	220.66	243.27	194.79	223.93	135.94			Y(308)	1	1	1	1	4	1	1	1	4	1	1	1	1	1		Z(308)
Y(309)	1	1	1	1	4	1	1	1	1	1	1	1	1	1		Z(309)	249.85	232.57	176.68	218.83	258.19	267.52	165.56	372.17	269.77	220.82	243.51	200.02	224.08	136.05			Y(309)	1	1	1	1	1	1	4	1	1	1	1	1	1	1		Z(309)
Y(310)	1	1	1	1	1	1	1	1	1	3	1	1	1	1		Z(310)	250.77	232.68	178.01	219.38	258.72	267.95	165.67	372.64	271.09	220.93	243.63	200.74	224.26	136.11			Y(310)	1	1	1	3	1	1	1	3	1	1	1	1	1	1		Z(310)
Y(311)	1	1	3	1	1	1	1	1	1	4	1	1	1	1		Z(311)	251.23	233.16	178.12	219.73	258.91	268.16	165.76	373.08	271.78	222.39	244.61	201.02	224.71	136.24			Y(311)	1	1	1	4	1	1	1	4	1	1	1	1	1	1		Z(311)
Y(312)	1	1	1	1	1	1	1	1	1	1	1	1	1	3		Z(312)	254.13	233.3	178.55	219.85	259.19	268.59	165.86	373.82	274.35	231.17	244.8	203.04	225.43	136.45			Y(312)	1	1	1	1	4	1	1	1	1	1	1	1	1	3		Z(312)
Y(313)	1	1	4	1	1	1	1	1	1	1	1	1	1	1		Z(313)	254.34	233.85	179.99	220.28	259.45	269.35	165.95	374.55	275.26	231.34	246.03	203.21	225.55	137.08			Y(313)	1	1	1	1	1	1	1	1	1	1	1	1	1	4		Z(313)
Y(314)	1	1	1	1	1	1	1	1	1	1	1	1	1	1		Z(314)	254.58	236.25	191.16	220.45	259.54	269.51	166.13	375.59	275.52	231.56	246.81	203.31	225.73	137.23			Y(314)	1	1	1	1	1	1	1	1	1	1	1	1	1	1		Z(314)
Y(315)	1	1	1	3	1	1	1	3	1	1	1	1	1	4		Z(315)	254.78	236.55	191.87	220.56	259.64	270.22	166.23	375.7	275.75	231.77	246.92	204.13	226	137.99			Y(315)	1	4	1	1	1	1	1	1	1	1	1	1	3	1		Z(315)
Y(316)	1	1	1	4	1	1	1	4	1	1	1	1	1	4		Z(316)	256.68	236.67	192.01	221.59	259.78	270.78	166.5	376.39	277.49	231.95	247.43	204.46	226.22	142.39			Y(316)	1	4	1	1	1	1	1	1	1	1	1	4	4	1		Z(316)
Y(317)	1	1	1	1	1	1	3	1	3	1	3	1	1	1		Z(317)	256.93	236.78	192.12	227.83	259.89	270.89	166.61	394.4	277.6	232.14	247.54	204.6	226.51	143.83			Y(317)	1	1	1	1	1	1	1	1	1	1	4	1	1	1		Z(317)
Y(318)	1	1	1	1	1	1	1	1	1	1	4	1	1	1		Z(318)	257.23	237.59	192.38	228.11	260	271.37	166.93	395	278.39	232.31	248.99	204.88	227.18	143.98			Y(318)	1	1	1	1	4	1	1	1	1	1	1	1	1	1		Z(318)
Y(319)	1	1	1	1	3	1	1	1	1	1	1	4	1	1		Z(319)	257.37	237.78	192.72	228.47	260.11	271.49	167.31	395.72	278.88	232.48	260.22	206.19	227.33	144.11			Y(319)	1	1	1	1	1	1	1	1	1	1	1	1	1	1		Z(319)
Y(320)	1	1	1	1	1	1	4	1	1	1	1	1	1	1		Z(320)	259.28	237.97	195.31	228.9	260.34	272.26	168.19	396.47	279.39	232.64	260.94	206.94	227.64	144.24			Y(320)	1	1	1	1	1	1	1	1	1	1	1	1	1	1		Z(320)
Y(321)	1	4	3	1	1	1	4	1	1	1	1	1	1	1		Z(321)	259.57	239.59	195.42	229.16	260.45	272.78	173.19	397.6	279.86	232.95	261.73	207.34	228	144.34			Y(321)	3	1	1	1	1	1	4	1	1	1	4	1	1	1		Z(321)
Y(322)	1	1	1	1	1	1	1	1	4	1	1	1	1	1		Z(322)	260.22	241.35	195.56	229.71	260.56	273.04	174.12	397.94	281.39	233.1	262.1	208.1	228.78	144.44			Y(322)	1	1	1	1	1	1	1	1	1	3	1	4	1	1		Z(322)
Y(323)	1	1	1	1	1	1	1	1	1	1	1	1	1	1		Z(323)	260.35	241.52	195.68	230.21	260.91	273.23	174.33	398.66	297.81	233.27	263.04	208.25	229.05	144.65			Y(323)	1	1	4	1	4	1	1	1	1	4	1	1	1	1		Z(323)
Y(324)	1	1	1	1	1	1	1	1	1	1	1	1	1	1		Z(324)	262.92	241.75	195.83	230.34	261.02	273.36	174.43	399.6	298.23	233.44	263.33	208.49	229.2	145.2			Y(324)	1	1	1	1	1	1	1	1	1	1	1	1	1	4		Z(324)
Y(325)	1	1	1	1	4	1	1	1	1	1	1	1	1	1		Z(325)	263.22	241.9	196.25	230.59	261.79	273.48	174.73	400.21	298.38	234	263.73	210.69	229.35	145.38			Y(325)	4	1	1	1	1	1	1	3	1	1	1	1	1	1		Z(325)
Y(326)	1	1	1	1	1	1	1	4	1	1	1	1	1	1		Z(326)	263.69	242.07	196.37	230.72	283.48	273.59	174.88	401.79	298.82	234.24	264.16	210.95	229.55	145.5			Y(326)	1	3	1	1	1	1	1	4	1	1	1	1	1	1		Z(326)
Y(327)	1	1	1	1	1	1	1	1	1	1	1	1	1	1		Z(327)	264.56	242.21	196.53	231.35	283.74	274.42	175.15	403.01	299.13	234.78	264.54	211.38	229.87	145.84			Y(327)	1	1	1	1	1	1	1	1	1	1	1	1	1	1		Z(327)
Y(328)	3	4	1	1	1	1	1	1	1	1	1	1	1	1		Z(328)	264.67	243.79	196.71	231.82	283.87	274.87	175.26	403.28	300.1	235.46	265.12	211.54	230.1	146.03			Y(328)	1	1	1	3	1	1	1	1	1	1	1	1	1	1		Z(328)
Y(329)	4	1	1	1	1	1	1	1	1	1	1	1	1	1		Z(329)	265.99	245.01	196.85	231.96	284.01	275.55	175.69	404.71	300.23	235.65	265.37	211.76	230.23	146.4			Y(329)	1	1	1	4	1	1	1	1	4	1	1	1	1	1		Z(329)
Y(330)	4	1	4	1	1	1	1	1	1	1	1	1	1	1		Z(330)	272.59	245.11	197.79	232.31	284.16	276.35	175.81	404.84	301.76	235.76	265.58	211.89	230.44	146.51			Y(330)	1	1	1	1	4	1	1	1	1	1	1	1	1	1		Z(330)
Y(331)	4	1	1	1	1	3	1	1	1	1	1	1	1	4		Z(331)	273.59	245.6	212.26	232.79	284.3	276.46	176.22	405.41	302.35	236.16	265.94	212.02	230.6	147.19			Y(331)	1	1	1	1	1	1	4	1	1	1	1	1	1	1		Z(331)
Y(332)	1	1	1	1	1	4	4	1	1	1	1	4	1	1		Z(332)	275.54	245.67	212.99	233.22	284.48	277.19	177.19	405.8	302.48	236.64	266.26	213.39	231.12	148.53			Y(332)	1	1	1	1	1	1	1	1	1	1	1	1	1	1		Z(332)
Y(333)	1	1	1	1	1	1	1	1	1	1	1	1	1	1		Z(333)	275.86	245.8	213.2	233.74	284.63	287.28	178.12	405.89	302.96	237.24	266.63	213.96	231.66	148.63			Y(333)	1	4	1	1	1	1	1	1	1	3	1	1	1	1		Z(333)
Y(334)	1	1	1	1	4	1	1	4	1	1	1	1	1	1		Z(334)	275.98	246.96	213.4	234.44	285.39	287.5	178.22	406.79	303.08	237.8	266.81	214.02	231.78	148.76			Y(334)	1	1	1	1	1	1	1	1	1	4	1	1	1	1		Z(334)
Y(335)	1	1	1	1	1	1	1	2	1	1	1	1	1	1		Z(335)	276.07	247.06	213.53	234.86	286.34	287.86	178.34	409.07	305.46	237.99	267.18	214.31	233.37	148.88			Y(335)	1	1	1	1	1	1	1	1	1	4	1	1	1	1		Z(335)
Y(336)	1	1	1	1	1	1	1	1	1	1	4	1	1	1		Z(336)	276.42	247.17	213.68	235.69	286.63	288.23	178.67	412.86	305.82	238.31	268.19	214.52	233.55	148.97			Y(336)	1	1	1	1	1	1	1	1	1	1	1	1	1	1		Z(336)
Y(337)	1	4	1	1	1	1	1	1	1	1	1	1	1	1		Z(337)	276.81	247.99	213.85	235.94	286.77	288.32	178.77	413.82	306.01	238.94	268.75	214.62	233.83	149.07			Y(337)	1	1	1	1	1	1	4	1	4	1	1	1	1	4		Z(337)
Y(338)	1	4	1	1	1	1	1	1	3	3	1	1	1	1		Z(338)	277.44	248.59	215.97	236.52	287.07	288.98	178.86	414.37	306.12	239.05	269.61	214.79	234.27	149.15			Y(338)	1	1	3	1	1	1	1	1	1	1	3	1	1	1		Z(338)
Y(339)	1	1	1	1	1	1	1	1	1	1	1	1	1	1		Z(339)	277.83	249.73	216.08	236.69	287.2	289.07	178.98	414.98	306.65	239.92	269.78	214.88	234.42	149.34			Y(339)	1	1	1	1	1	1	1	1	1	1	4	3	1	1		Z(339)
Y(340)	1	1	1	1	1	1	1	1	1	4	1	1	1	1		Z(340)	278.27	250.09	216.21	236.97	287.96	289.18	179.13	415.36	306.78	240.39	270.08	215.16	234.6	149.63			Y(340)	1	1	1	1	4	1	1	1	1	1	1	4	1	1		Z(340)
Y(341)	1	1	1	1	1	1	4	1	3	1	1	3	1	1		Z(341)	280.69	250.48	216.51	237.87	288.06	289.29	180.39	416	306.89	248.23	270.33	215.27	234.84	149.83			Y(341)	1	3	4	1	1	1	1	4	1	1	1	1	1	1		Z(341)
Y(342)	1	1	1	1	1	1	1	1	4	1	1	1	1	1		Z(342)	281.03	250.83	216.66	238.15	288.18	289.81	181.33	416.33	307.79	248.41	270.64	215.39	235.2	149.94			Y(342)	1	1	1	1	1	1	1	1	1	1	1	1	1	1		Z(342)
Y(343)	1	1	1	1	1	1	1	1	4	1	1	1	1	3		Z(343)	281.16	251.42	217.05	239.15	288.39	289.94	181.43	416.7	314.39	248.93	270.81	215.59	235.32	150.05			Y(343)	1	1	1	1	1	1	1	1	1	1	1	1	1	1		Z(343)
Y(344)	1	4	1	1	1	1	1	4	1	1	3	4	1	1		Z(344)	281.29	252.39	217.48	239.5	290.11	290.09	181.69	418.79	333.99	249.16	270.92	216.79	235.45	150.49			Y(344)	1	1	1	1	1	1	1	1	1	1	1	1	1	1		Z(344)
Y(345)	1	1	1	1	1	1	1	1	1	1	4	1	1	1		Z(345)	283.59	253	219.32	239.97	290.41	290.84	181.96	419.93	334.05	249.56	271.99	222.82	235.61	150.71			Y(345)	3	1	1	1	1	1	1	1	3	1	1	1	1	1		Z(345)
Y(346)	1	1	1	1	1	1	1	1	1	1	1	1	1	1		Z(346)	283.86	253.65	219.72	240.25	290.67	290.95	182.46	420.46	334.25	249.8	286.36	223.03	236.02	150.83			Y(346)	1	3	1	1	1	1	1	1	1	1	1	4	1	1		Z(346)
Y(347)	1	1	3	1	1	1	4	1	1	1	1	1	3	4		Z(347)	284.02	253.78	219.83	240.6	290.96	291.89	183.39	421.18	334.72	249.95	286.53	223.8	236.13	151.79			Y(347)	1	1	1	1	1	3	1	1	1	1	1	1	1	1		Z(347)
Y(348)	1	1	1	3	1	1	1	1	1	1	1	1	4	4		Z(348)	284.13	253.88	219.96	240.71	291.53	292.58	184.35	421.94	334.77	250.5	287.52	224.3	237.19	155.19			Y(348)	4	1	1	1	4	4	4	1	1	1	1	1	1	1		Z(348)
Y(349)	1	1	1	4	1	1	1	1	1	1	1	1	1	1		Z(349)	285.18	254.69	220.28	241.79	291.77	292.71	184.55	422.51	335.01	250.77	287.78	224.52	249.01	157.18			Y(349)	1	1	1	1	1	4	1	1	4	1	1	1	1	1		Z(349)
Y(350)	1	1	1	1	1	1	1	1	1	1	1	1	1	1		Z(350)	287.19	254.8	220.46	248.86	291.9	293.19	184.72	422.73	335.48	251.11	287.96	225.31	249.95	157.42			Y(350)	1	4	1	1	1	1	1	1	1	1	1	1	1	4		Z(350)
Y(351)	1	1	4	1	1	1	1	1	1	1	1	1	1	1		Z(351)	287.59	254.94	221.79	249.48	292.06	293.9	185.08	423.24	335.63	251.76	288.29	225.58	250.11	157.55			Y(351)	1	4	1	1	1	1	1	4	1	1	1	1	4	1		Z(351)
Y(352)	1	1	4	1	3	1	1	1	1	1	1	1	1	1		Z(352)	287.73	255.06	229.79	249.57	292.17	294.43	185.22	423.77	336.28	252.63	288.57	225.88	250.43	157.66			Y(352)	1	1	1	1	1	1	1	4	1	1	1	1	1	1		Z(352)
Y(353)	1	1	1	1	1	1	1	1	1	1	1	4	1	1		Z(353)	287.88	255.2	234	250.26	292.41	295.23	185.51	425.35	336.5	253.47	288.69	227.79	250.78	157.76			Y(353)	1	1	1	3	1	1	1	1	1	1	1	1	1	1		Z(353)
Y(354)	1	1	1	1	4	4	1	1	1	1	1	1	1	1		Z(354)	289.8	255.33	234.28	250.76	292.99	296.39	185.62	425.58	336.65	253.65	289.61	232.37	251.51	157.86			Y(354)	1	1	3	4	4	1	1	1	1	1	3	4	1	1		Z(354)
Y(355)	1	1	1	1	1	1	1	1	3	1	1	1	1	1		Z(355)	290.11	255.51	234.77	251.17	313.23	297.53	185.73	425.81	336.76	254.21	289.85	232.74	251.77	157.95			Y(355)	4	1	1	1	1	1	1	1	1	1	4	1	1	1		Z(355)
Y(356)	1	1	1	1	1	1	1	1	4	1	1	1	3	1		Z(356)	290.35	255.63	237.53	251.58	313.38	297.84	185.96	426.52	337.59	254.36	290.03	233.75	251.88	158.12			Y(356)	1	1	3	1	1	1	1	1	1	1	1	1	1	1		Z(356)
Y(357)	1	1	1	1	1	1	1	1	4	1	1	1	4	1		Z(357)	290.6	256.11	237.68	252.22	313.71	297.95	186.11	426.96	347.19	254.77	291.43	234.05	252.99	158.4			Y(357)	1	1	1	1	1	1	1	1	1	1	1	1	1	1		Z(357)
Y(358)	4	4	1	1	1	1	3	1	1	1	1	4	1	1		Z(358)	292.19	256.99	238.13	252.61	314.15	298.32	186.22	427.45	349.1	255.32	291.98	235.59	267.69	158.59			Y(358)	1	1	1	1	1	1	1	1	1	1	1	1	1	1		Z(358)
Y(359)	1	1	1	1	1	1	4	1	1	1	1	1	1	1		Z(359)	292.92	258.45	243.07	253.14	314.35	298.77	187.39	428.38	349.76	255.45	292.37	235.92	267.98	159.1			Y(359)	4	1	3	1	1	1	4	1	1	1	1	1	1	3		Z(359)
Y(360)	1	1	1	1	1	1	4	1	1	1	1	1	1	1		Z(360)	293.07	258.91	243.21	253.74	314.55	299.39	192.19	428.81	350.13	255.58	292.72	236.21	268.12	159.53			Y(360)	1	1	1	1	1	1	1	1	1	1	1	1	1	1		Z(360)
Y(361)	1	1	1	1	1	1	1	1	1	1	1	1	1	1		Z(361)	293.18	259.05	243.36	254.39	318.39	300.01	193.16	429.47	350.33	255.95	294.33	236.34	268.35	160.08			Y(361)	1	1	1	1	1	1	1	1	1	1	1	1	1	1		Z(361)
Y(362)	1	1	1	1	1	1	1	4	4	1	1	1	1	4		Z(362)	293.91	259.73	243.49	255.34	318.7	300.2	193.63	430.79	351.59	256.07	294.55	236.45	269.39	160.99			Y(362)	1	1	4	1	1	1	1	1	1	1	1	1	1	1		Z(362)
Y(363)	1	1	1	1	1	1	1	1	1	1	1	1	1	1		Z(363)	294.06	260.62	243.65	255.97	318.9	300.31	194.11	431.92	352.16	256.4	294.74	236.91	269.8	162.71			Y(363)	1	4	4	1	1	1	1	1	1	1	3	1	1	1		Z(363)
Y(364)	1	1	1	1	1	1	4	1	1	1	3	1	1	1		Z(364)	294.17	261.1	243.89	256.18	319.02	300.5	194.99	432.05	352.29	256.93	294.85	237.1	270.15	162.8			Y(364)	1	1	4	1	1	1	1	1	4	3	4	1	1	4		Z(364)
Y(365)	1	4	1	1	1	1	1	1	1	1	4	1	1	1		Z(365)	296.01	261.99	244.02	256.53	319.24	300.71	196.45	432.77	352.67	257.81	295.99	237.19	270.37	162.9			Y(365)	1	1	1	1	1	1	4	1	1	4	4	1	1	1		Z(365)
Y(366)	1	1	1	1	1	3	1	1	1	1	4	4	1	1		Z(366)	296.76	263.28	244.36	257.11	320.77	300.82	196.56	432.9	352.86	257.95	306.79	238.39	270.54	163.02			Y(366)	1	1	1	1	1	1	1	1	1	1	1	4	1	1		Z(366)
Y(367)	4	1	1	1	1	1	1	1	1	1	1	1	1	1		Z(367)	298.39	263.4	244.48	258.06	321.14	302.28	196.62	433.4	353	258.08	308.67	238.85	270.69	163.12			Y(367)	1	1	1	1	1	3	1	1	1	1	1	1	1	1		Z(367)
Y(368)	1	1	1	1	1	1	1	1	1	1	1	1	1	1		Z(368)	305.35	264.14	244.63	258.22	321.66	303.07	197.27	433.92	353.26	258.36	308.8	239.1	271.13	163.22			Y(368)	1	1	1	1	3	4	1	1	1	1	1	1	1	1		Z(368)
Y(369)	1	1	1	1	1	1	1	1	1	1	1	1	1	1		Z(369)	305.46	264.26	244.74	258.63	321.89	303.26	197.43	434.37	353.42	258.9	309.26	239.42	271.28	163.35			Y(369)	1	1	1	1	1	1	1	1	1	1	1	1	1	1		Z(369)
Y(370)	1	1	4	1	1	1	1	1	1	4	1	1	1	1		Z(370)	305.78	264.37	245.79	259.05	322.71	303.59	197.7	434.93	353.76	260.19	309.78	239.5	271.45	163.54			Y(370)	1	1	1	1	1	1	4	1	1	1	1	1	3	1		Z(370)
Y(371)	1	1	1	1	1	1	1	1	4	1	1	1	1	1		Z(371)	305.97	264.5	246.31	259.21	325.03	304.12	198	435.31	355.19	261.72	310.08	239.77	271.62	163.72			Y(371)	3	1	4	1	1	1	1	1	1	1	1	1	4	1		Z(371)
Y(372)	1	1	1	1	1	1	1	1	1	1	1	1	1	1		Z(372)	306.54	265.58	246.44	259.66	325.48	304.76	198.24	435.77	355.84	262.52	310.67	239.88	271.88	163.83			Y(372)	4	1	1	1	4	1	1	1	1	1	1	1	1	1		Z(372)
Y(373)	1	1	1	1	1	1	4	1	1	1	1	1	1	1		Z(373)	306.67	265.75	246.54	260.36	325.61	304.87	198.99	436.17	356.21	263.04	311.19	239.98	272.26	163.96			Y(373)	1	1	1	1	1	1	1	4	1	1	1	1	1	1		Z(373)
Y(374)	4	1	1	1	1	1	1	1	1	1	1	4	1	3		Z(374)	307.99	265.91	246.67	261.06	325.91	305.43	200.23	436.9	356.52	263.44	311.48	241.39	274.67	164.07			Y(374)	1	3	1	1	1	1	1	4	1	1	1	1	1	1		Z(374)
Y(375)	1	1	1	1	1	1	1	1	4	1	1	1	1	1		Z(375)	308.77	266.09	246.92	261.44	326.06	305.55	200.34	437.32	357.99	263.57	311.87	241.86	275.36	164.26			Y(375)	1	4	1	1	1	1	1	1	1	1	1	1	1	1		Z(375)
Y(376)	1	1	1	1	3	1	1	1	1	1	1	1	1	1		Z(376)	309.03	266.3	247.18	262.01	326.17	306.27	200.6	438.15	358.63	264.07	312.1	241.99	275.59	164.52			Y(376)	1	4	1	1	1	1	1	1	1	1	1	1	1	1		Z(376)
Y(377)	1	1	1	1	4	1	1	1	1	1	3	1	1	1		Z(377)	309.31	266.46	249.55	263.4	326.99	306.95	201.21	438.26	358.75	264.22	312.21	242.15	275.81	164.72			Y(377)	1	1	1	3	1	1	1	1	1	1	1	1	1	3		Z(377)
Y(378)	1	1	1	1	1	1	1	1	1	1	4	1	1	3		Z(378)	309.38	266.61	249.66	263.77	348.12	308.02	201.92	439.45	359.37	264.43	313.19	242.44	275.99	164.83			Y(378)	1	1	1	4	4	1	1	1	1	1	1	4	1	1		Z(378)
Y(379)	1	1	1	1	1	1	1	1	1	1	4	1	1	4		Z(379)	311.63	266.86	249.96	264.59	350.38	308.64	202.21	440.05	359.91	264.62	327.19	242.76	277.03	165.79			Y(379)	1	1	1	1	1	1	1	1	4	1	1	1	1	1		Z(379)
Y(380)	1	4	1	1	1	1	4	1	1	3	1	1	1	4		Z(380)	312.36	267.79	250.09	265.15	350.52	308.77	203.19	440.49	360.04	264.73	328.46	243.01	277.16	169.19			Y(380)	1	1	1	1	1	1	1	1	1	1	1	1	1	4		Z(380)
Y(381)	1	1	1	1	1	1	4	1	1	4	1	1	1	4		Z(381)	312.84	269.83	250.2	265.77	350.69	309.81	203.99	442.02	360.21	265.99	329.02	243.12	277.38	177.99			Y(381)	1	1	1	1	1	1	1	1	1	3	1	1	1	4		Z(381)
Y(382)	1	1	1	1	1	1	1	4	1	1	1	1	1	1		Z(382)	314.8	270.09	250.43	266.13	350.9	310.5	204.81	442.99	360.35	273.74	329.15	243.23	277.61	181.08			Y(382)	1	1	1	1	1	1	1	1	1	4	1	1	3	1		Z(382)
Y(383)	1	1	1	1	1	1	1	1	1	1	1	1	1	1		Z(383)	315.1	270.47	250.65	266.29	351.05	311.65	204.93	444.5	360.46	274.02	329.57	245.22	277.73	181.24			Y(383)	1	1	1	1	1	1	4	1	1	1	1	1	4	1		Z(383)
Y(384)	1	1	1	1	4	1	1	1	1	1	1	1	1	1		Z(384)	315.32	270.56	250.92	266.99	352.59	312.41	205.22	444.58	360.58	274.29	329.7	245.4	277.87	181.37			Y(384)	1	1	1	1	1	1	1	1	1	1	1	1	1	1		Z(384)
Y(385)	1	1	1	1	1	1	1	1	1	1	1	1	1	1		Z(385)	315.44	271.88	251.46	267.54	353.19	312.53	205.41	444.99	361.08	274.42	329.97	245.56	278.03	181.51			Y(385)	1	4	1	1	1	1	1	1	1	1	1	1	1	4		Z(385)
Y(386)	1	1	4	1	1	1	1	1	1	1	1	1	1	1		Z(386)	315.57	271.96	252.59	268.29	353.37	313.12	205.51	445.46	363.08	274.57	330.11	245.84	278.21	181.7			Y(386)	4	1	1	1	4	1	1	1	1	1	1	1	1	4		Z(386)
Y(387)	1	1	1	1	1	1	1	1	1	1	1	1	1	1		Z(387)	315.69	272.06	253.29	268.43	353.61	313.79	205.64	446	363.39	274.79	331	245.96	278.38	181.98			Y(387)	1	1	3	1	1	1	1	1	1	1	1	1	1	1		Z(387)
Y(388)	1	1	1	1	1	1	1	1	1	1	1	1	1	1		Z(388)	316.3	272.18	253.37	268.83	353.72	313.91	205.77	446.38	363.69	275.12	331.72	246.25	278.55	182.08			Y(388)	1	1	4	1	1	1	1	1	1	1	1	1	1	1		Z(388)
Y(389)	1	1	1	1	1	1	3	1	1	1	1	3	1	1		Z(389)	316.48	272.3	253.52	270.05	353.84	314.82	205.88	446.87	364	275.63	331.83	246.36	278.91	182.23			Y(389)	1	1	1	1	1	1	1	4	1	1	1	4	1	1		Z(389)
Y(390)	1	3	1	3	1	1	1	1	1	1	1	4	1	1		Z(390)	318.4	272.41	253.62	270.16	353.95	316.03	206.22	447.4	364.12	275.77	332.5	247.39	279.31	182.44			Y(390)	1	1	1	1	1	1	1	1	1	1	1	1	1	1		Z(390)
Y(391)	1	1	1	4	1	1	1	1	1	1	1	1	1	3		Z(391)	318.61	272.52	253.8	271.39	354.14	316.15	206.34	448.26	364.23	276.52	332.85	253.5	279.44	182.55			Y(391)	1	1	1	1	1	1	1	1	1	1	1	1	1	1		Z(391)
Y(392)	1	1	1	1	1	1	3	1	4	1	1	1	1	4		Z(392)	318.72	273.08	254.36	278.14	354.28	316.83	206.45	449.04	365.19	277.04	334.44	253.61	279.74	183.39			Y(392)	1	1	1	1	4	1	1	1	1	1	1	1	1	1		Z(392)
Y(393)	1	4	1	1	1	1	4	1	1	1	1	1	1	1		Z(393)	319.63	273.79	254.49	278.3	354.4	316.94	207.19	449.68	365.82	277.42	334.56	253.73	280.76	194.06			Y(393)	1	1	1	1	1	1	3	1	1	1	1	1	1	1		Z(393)
Y(394)	1	1	4	1	1	1	4	1	1	1	1	1	1	1		Z(394)	319.74	280.39	255.59	278.56	354.52	318.15	212.59	450.79	365.99	277.7	334.85	253.82	280.89	194.18			Y(394)	1	4	1	1	1	1	1	1	1	1	1	1	1	1		Z(394)
Y(395)	4	1	1	1	1	1	4	1	1	1	1	1	1	1		Z(395)	321.39	281.46	256.2	279.14	354.68	318.58	227.19	451.26	366.3	278.15	335.14	255.83	281.04	194.31			Y(395)	1	1	1	1	1	1	1	1	1	1	1	1	1	1		Z(395)
Y(396)	1	1	1	1	1	1	1	1	1	1	1	1	1	1		Z(396)	322.07	281.59	256.32	279.33	356.47	319.2	230.17	452.64	366.64	278.27	336.77	256.43	281.24	194.48			Y(396)	1	1	1	1	1	1	1	1	1	1	1	1	1	1		Z(396)
Y(397)	1	1	1	1	1	1	1	4	1	1	1	1	1	1		Z(397)	322.39	281.75	256.39	279.98	356.59	320.49	230.29	453.39	366.77	278.49	336.89	256.54	281.44	194.61			Y(397)	1	1	1	1	1	1	4	1	1	1	1	1	1	4		Z(397)
Y(398)	1	1	1	1	1	1	1	1	4	1	1	1	1	1		Z(398)	322.49	282.29	256.56	280.45	356.72	320.61	230.4	454.23	367.99	278.79	337.07	256.72	281.61	194.73			Y(398)	1	1	1	1	1	1	4	1	1	1	1	1	1	1		Z(398)
Y(399)	1	1	1	1	1	1	1	1	1	1	1	1	1	1		Z(399)	323.07	282.45	256.68	281.01	356.98	321.28	230.51	454.66	368.56	278.95	337.73	257.16	281.92	194.88			Y(399)	1	1	1	1	1	1	1	1	1	1	1	1	1	1		Z(399)
Y(400)	1	1	1	1	1	1	1	1	1	1	1	4	3	1		Z(400)	323.32	282.62	256.9	281.41	357.09	321.4	230.62	454.79	368.88	279.57	337.93	257.99	282.03	195.01			Y(400)	1	1	1	1	1	1	1	1	1	1	1	4	1	1		Z(400)
Y(401)	1	1	1	1	1	1	1	1	1	1	1	1	4	1		Z(401)	323.43	282.88	257.01	281.61	358.12	321.64	230.8	454.94	369.23	280.04	338.15	258.62	283.19	195.18			Y(401)	1	1	3	1	1	1	1	1	4	1	3	1	1	1		Z(401)
Y(402)	1	3	1	1	1	1	4	1	1	1	1	1	1	1		Z(402)	325.48	282.99	257.24	281.94	358.37	322.48	231.79	455.49	369.99	280.43	338.27	258.74	294.73	195.35			Y(402)	1	1	4	1	1	1	1	1	1	1	4	1	1	1		Z(402)
Y(403)	1	4	4	1	4	1	1	1	1	1	1	1	1	1		Z(403)	325.7	283.99	258.59	282.64	359.39	322.6	233.38	456.71	371.93	280.61	338.46	258.85	295.62	195.47			Y(403)	1	4	1	1	4	1	1	3	1	1	1	1	1	1		Z(403)
Y(404)	1	1	1	1	1	1	1	1	1	1	1	1	1	4		Z(404)	325.82	292.26	258.96	282.9	360	322.91	233.7	457.08	372.26	280.96	338.79	258.97	296.36	196.39			Y(404)	1	4	1	3	1	1	1	4	1	1	1	1	1	1		Z(404)
Y(405)	1	1	1	1	1	1	1	3	1	3	1	1	1	4		Z(405)	326.38	292.69	259.05	283.17	360.47	323.82	233.82	457.29	372.37	281.07	339.05	259.04	296.5	196.99			Y(405)	1	1	1	4	1	1	1	4	1	1	1	1	3	1		Z(405)
Y(406)	3	1	1	1	1	1	1	4	1	4	1	1	1	4		Z(406)	326.59	292.84	259.18	283.37	360.58	323.98	233.94	457.99	372.72	282.39	339.79	259.49	296.75	197.39			Y(406)	1	1	1	1	1	1	1	1	4	1	1	1	4	1		Z(406)
Y(407)	4	1	1	1	1	3	1	1	1	1	1	1	1	4		Z(407)	328.19	293.02	259.26	284.03	360.93	324.19	234.05	476.66	373	290.96	340.14	259.6	297.12	200.19			Y(407)	1	1	1	1	1	1	3	1	1	1	1	1	1	1		Z(407)
Y(408)	1	1	1	1	1	1	1	1	4	1	1	1	1	1		Z(408)	339.17	293.21	259.38	284.3	361.05	325.54	234.15	477.07	373.99	291.22	340.3	259.72	297.27	201.06			Y(408)	1	1	1	1	1	1	4	1	1	1	1	1	1	1		Z(408)
Y(409)	4	1	1	1	1	1	1	1	1	1	1	1	1	1		Z(409)	340.79	293.43	259.5	284.96	361.14	326.45	234.3	477.22	374.59	291.42	340.47	261.34	297.57	201.19			Y(409)	1	1	1	1	1	3	4	1	1	1	1	1	1	1		Z(409)
Y(410)	1	1	1	1	1	1	1	1	1	1	1	1	1	1		Z(410)	341.45	293.63	259.63	285.27	361.31	327.36	234.45	478.51	374.9	291.59	340.62	261.55	298.03	201.29			Y(410)	1	1	1	1	1	4	4	1	1	1	1	1	1	1		Z(410)
Y(411)	1	1	1	1	1	1	4	1	1	1	1	1	1	1		Z(411)	341.71	294.14	259.74	285.83	361.46	328.21	235.39	479.02	375.5	291.8	342.24	261.67	298.17	201.51			Y(411)	1	1	1	1	1	1	1	1	1	1	1	1	1	1		Z(411)
Y(412)	1	1	4	1	1	1	1	1	1	1	1	1	1	1		Z(412)	341.88	294.54	261.19	286.39	363.79	329.59	236.51	479.97	375.61	292.17	342.38	261.78	298.4	201.6			Y(412)	1	1	1	1	1	1	1	1	1	3	1	1	1	1		Z(412)
Y(413)	1	1	1	1	1	1	1	1	1	1	1	1	1	1		Z(413)	342	294.68	261.73	287.31	364.03	329.7	236.61	480.47	375.74	292.6	342.84	261.96	298.73	202.11			Y(413)	1	4	1	1	4	1	1	1	1	4	1	1	1	4		Z(413)
Y(414)	1	1	1	1	1	1	1	1	1	1	1	1	1	1		Z(414)	342.09	295.2	261.87	287.8	364.5	330.37	237.04	481.2	376.09	292.77	343.24	262.17	298.91	202.27			Y(414)	1	1	3	1	1	1	1	1	1	4	1	1	1	1		Z(414)
Y(415)	1	4	1	1	1	1	1	1	1	1	1	1	1	1		Z(415)	342.22	295.99	262.14	288.46	365.02	330.91	237.18	481.82	377.89	293.27	343.54	262.29	299.19	202.38			Y(415)	1	1	1	1	1	1	1	1	1	1	1	1	1	1		Z(415)
Y(416)	1	1	1	1	1	1	1	4	1	3	1	1	1	1		Z(416)	342.3	297.69	262.25	288.96	365.37	332.06	237.59	483.19	378.18	293.38	343.66	262.42	299.34	202.5			Y(416)	1	1	1	1	1	1	1	1	3	1	1	1	1	1		Z(416)
Y(417)	1	1	1	1	1	1	1	1	1	1	1	1	1	1		Z(417)	342.45	298.23	262.47	289.41	365.92	332.23	237.79	484.74	378.52	294.56	343.93	262.6	299.61	202.63			Y(417)	1	1	1	1	1	1	1	1	1	1	1	1	1	1		Z(417)
Y(418)	1	1	1	1	1	4	1	1	1	1	1	4	1	1		Z(418)	342.65	298.72	262.55	290.53	367.73	333.19	237.98	485.32	378.64	295.2	344.05	263.79	299.82	202.97			Y(418)	1	1	1	1	1	1	4	1	4	1	1	1	1	1		Z(418)
Y(419)	1	1	1	1	1	4	3	1	1	1	1	1	1	1		Z(419)	342.97	300.65	262.7	291.63	367.99	344.99	238.09	485.57	378.79	295.72	344.29	264.46	300.12	203.17			Y(419)	1	1	1	1	1	1	1	1	1	1	1	4	1	1		Z(419)
Y(420)	1	1	4	1	1	4	1	1	1	1	1	1	1	1		Z(420)	344.7	300.94	263.59	292.35	368.1	358.59	238.34	485.67	381.03	295.85	344.4	264.62	300.26	203.28			Y(420)	1	1	3	1	1	1	1	4	1	1	1	1	1	1		Z(420)
Y(421)	1	1	1	1	1	1	4	1	1	1	1	1	1	1		Z(421)	345.07	301.17	264.28	292.48	368.47	361.24	239.59	486.06	381.66	296.04	345.28	264.78	300.4	203.39			Y(421)	1	1	4	1	1	1	1	1	1	1	1	1	1	3		Z(421)
Y(422)	1	1	1	1	1	1	4	1	1	1	3	1	1	1		Z(422)	345.63	302.33	264.41	293.08	368.59	362	245.19	487.49	381.87	297.39	345.39	264.89	300.84	203.58			Y(422)	1	1	4	1	1	1	1	1	1	1	1	1	1	1		Z(422)
Y(423)	1	1	1	1	1	1	1	1	1	1	4	1	1	1		Z(423)	346.2	302.47	264.64	293.81	368.7	362.44	247.37	487.83	382.2	297.76	346.39	264.98	301.91	203.79			Y(423)	1	1	4	1	1	1	1	1	1	1	1	1	1	1		Z(423)
Y(424)	1	1	1	1	1	1	1	4	4	1	1	1	1	3		Z(424)	348.31	302.83	265.19	294.8	368.94	362.57	247.58	488.59	383.39	297.87	359.63	265.48	302.41	203.9			Y(424)	4	1	1	1	1	1	1	1	1	1	1	1	1	1		Z(424)
Y(425)	1	1	1	1	1	1	1	1	1	1	1	1	1	4		Z(425)	348.73	303.39	265.31	295.17	369.77	362.86	247.68	490.1	383.83	298.25	359.77	265.96	302.68	204.59			Y(425)	1	1	1	1	1	1	1	1	1	1	1	1	3	1		Z(425)
Y(426)	1	1	1	1	1	1	1	1	1	1	1	1	1	4		Z(426)	348.88	303.51	265.39	295.5	370.07	363.02	247.9	490.23	384.03	299.29	360.01	266.11	302.89	209.59			Y(426)	1	1	1	1	1	1	1	1	1	1	1	1	4	1		Z(426)
Y(427)	1	1	1	1	1	1	1	1	1	1	1	4	1	1		Z(427)	349.02	303.62	265.5	295.77	370.42	363.25	248.03	490.37	384.47	299.41	360.94	267.79	303.45	210.94			Y(427)	1	1	1	1	4	1	4	1	1	1	1	1	1	1		Z(427)
Y(428)	4	1	1	1	4	1	4	1	1	1	1	1	4	1		Z(428)	350.19	303.77	265.91	296.31	371.19	363.36	249.19	490.79	384.81	299.72	361.09	268.56	304.59	211.12			Y(428)	1	1	1	1	1	1	1	4	4	1	1	1	1	1		Z(428)
Y(429)	1	1	4	1	1	1	1	1	1	1	1	1	1	1		Z(429)	350.65	304.42	266.79	296.58	372.15	363.83	250.17	491.28	384.93	300.37	361.27	268.76	306.53	211.24			Y(429)	1	4	1	1	1	1	1	1	1	1	1	1	1	1		Z(429)
Y(430)	1	4	1	1	1	1	1	1	1	1	1	1	1	1		Z(430)	350.97	305.39	267.46	296.71	372.27	364.3	250.29	491.79	385	300.56	362.64	268.81	309.31	211.41			Y(430)	1	4	1	1	1	1	1	1	1	1	1	1	1	1		Z(430)
Y(431)	1	1	1	1	1	1	1	1	1	1	1	1	1	1		Z(431)	351.53	306.44	267.57	297.12	372.39	364.51	250.47	492.29	385.36	301.74	362.75	268.92	310.35	211.53			Y(431)	1	1	1	1	1	1	1	1	1	1	4	1	1	3		Z(431)
Y(432)	1	1	1	1	1	1	1	3	1	1	1	1	1	1		Z(432)	352.2	306.61	267.87	297.24	372.53	365	250.6	492.4	385.52	301.9	363.62	269.28	310.47	211.65			Y(432)	1	1	1	1	1	1	1	1	1	1	1	1	1	1		Z(432)
Y(433)	1	1	1	1	1	1	1	4	1	1	1	1	1	1		Z(433)	352.33	307.24	268.13	297.64	373.04	365.11	250.75	492.99	385.98	302.81	364.02	269.46	310.66	211.76			Y(433)	3	1	1	1	1	1	1	1	1	1	1	1	1	4		Z(433)
Y(434)	4	1	1	1	1	1	1	1	4	1	1	1	1	1		Z(434)	354.39	307.36	268.46	297.87	373.47	365.25	251.03	513	387.99	302.92	364.63	269.77	311.01	211.98			Y(434)	4	1	1	1	1	1	1	1	1	1	1	1	1	4		Z(434)
Y(435)	1	1	1	1	1	1	1	1	1	1	1	1	1	1		Z(435)	355.33	308.11	268.58	298.37	373.64	365.82	251.18	513.62	388.64	303.04	364.76	269.88	311.79	212.15			Y(435)	1	1	1	1	1	1	1	1	1	3	1	3	1	1		Z(435)
Y(436)	1	1	1	1	1	1	1	1	1	3	1	4	1	1		Z(436)	355.44	308.61	269.03	299.47	373.84	365.94	251.32	514.35	388.77	303.15	365.1	270.99	311.92	212.41			Y(436)	1	1	1	1	4	1	1	1	1	4	1	1	1	1		Z(436)
Y(437)	1	1	4	1	1	1	1	1	1	4	4	1	1	4		Z(437)	355.56	308.73	269.99	300.84	374.58	366.35	251.48	514.84	389.19	304.99	365.99	271.5	312.05	213.39			Y(437)	1	1	1	1	1	1	4	1	1	1	1	1	1	1		Z(437)
Y(438)	1	1	1	3	1	1	1	1	1	4	1	1	1	1		Z(438)	356.15	308.86	270.54	301.05	376.96	366.46	251.76	515.34	389.28	310.19	367.61	271.62	312.2	214.99			Y(438)	1	1	1	1	1	1	1	1	1	1	1	1	1	1		Z(438)
Y(439)	1	1	1	4	1	1	4	1	1	1	1	1	1	1		Z(439)	356.66	308.97	270.76	301.99	377.09	367.19	252.59	516.08	389.51	325.66	367.78	271.73	312.32	215.11			Y(439)	1	1	1	1	1	1	1	1	1	1	1	3	1	1		Z(439)
Y(440)	1	1	1	1	1	1	1	1	1	1	1	1	1	1		Z(440)	358.2	309.51	270.87	310.94	377.38	367.72	253.92	516.66	389.62	325.9	367.92	271.81	312.44	215.23			Y(440)	1	1	1	1	1	1	1	1	1	1	1	1	1	1		Z(440)
Y(441)	1	1	1	1	3	1	1	1	1	1	1	1	1	1		Z(441)	358.5	310.31	271.09	311.07	377.49	368.44	254.03	516.97	389.76	326.23	368.74	271.89	312.61	215.34			Y(441)	1	3	1	1	1	1	1	1	1	1	1	1	1	4		Z(441)
Y(442)	1	1	1	1	1	1	1	1	1	1	1	1	1	1		Z(442)	358.68	310.44	271.22	311.23	377.77	368.64	254.15	517.96	389.9	327.63	368.87	271.98	313.47	215.44			Y(442)	1	1	1	3	4	1	1	1	1	1	1	4	1	1		Z(442)
Y(443)	1	1	1	1	1	1	1	1	1	1	1	1	1	1		Z(443)	361.32	311.02	271.31	311.38	377.88	369.34	254.44	518.73	390.31	328.98	369.19	272.09	313.74	215.52			Y(443)	1	4	1	4	1	1	1	3	1	1	1	4	1	1		Z(443)
Y(444)	1	1	1	1	1	1	1	1	4	1	1	1	1	1		Z(444)	361.76	311.21	271.48	312.41	378.28	369.54	254.95	519.66	391.59	329.12	370.48	272.2	314.43	215.86			Y(444)	1	1	1	1	1	1	1	4	3	1	1	1	1	1		Z(444)
Y(445)	1	1	3	1	1	1	1	1	1	1	1	1	1	1		Z(445)	362.25	311.91	271.59	312.51	378.9	370.12	255.1	520.17	392.4	329.31	370.64	272.35	314.63	216.01			Y(445)	1	1	4	1	1	1	1	1	1	1	1	4	1	1		Z(445)
Y(446)	4	1	4	1	3	1	4	1	1	1	1	1	1	1		Z(446)	363.59	312.02	272.99	312.75	379.01	370.32	255.79	521.32	393.09	329.53	370.81	272.46	316.16	216.13			Y(446)	1	1	1	1	1	1	1	1	4	1	1	1	1	1		Z(446)
Y(447)	1	1	1	1	4	1	1	1	1	1	1	1	1	1		Z(447)	364.61	312.21	279.46	313.56	380.39	371	256.82	521.87	394.28	330.86	371.17	272.57	316.3	216.36			Y(447)	1	1	1	1	1	1	1	1	4	1	1	1	3	1		Z(447)
Y(448)	1	1	1	1	4	1	1	1	1	1	1	1	1	1		Z(448)	364.75	312.33	279.67	313.97	386.79	372.15	257.21	522.61	396.42	332.21	371.31	274.23	316.43	216.8			Y(448)	1	1	1	1	1	3	1	1	4	1	1	1	0	1		Z(448)
Y(449)	1	4	1	1	1	1	1	1	1	1	1	1	1	1		Z(449)	364.87	312.99	279.98	314.49	420.25	372.35	257.33	523.81	396.58	332.88	371.61	274.71	316.59	216.94			Y(449)	1	1	1	1	1	4	1	1	1	1	1	1	0	1		Z(449)
Y(450)	1	1	1	1	1	1	1	1	1	1	1	1	1	1		Z(450)	365.17	314.18	280.17	314.74	421.19	372.94	257.46	524.42	396.73	333.92	371.89	274.91	316.93	217.27			Y(450)	1	1	1	1	1	4	1	1	1	1	1	1	0	1		Z(450)
Y(451)	1	1	1	1	1	1	1	1	1	3	1	1	1	1		Z(451)	365.43	314.51	280.35	314.87	421.68	373.62	257.59	525.1	397.26	334.03	372.82	275.08	317.1	217.49			Y(451)	1	3	1	1	1	1	4	1	1	1	1	1	0	3		Z(451)
Y(452)	1	1	1	1	1	1	1	3	1	4	1	1	1	1		Z(452)	365.77	315.36	280.57	315.27	423.8	374.85	257.78	525.21	397.44	335.39	373.04	275.36	317.25	217.6			Y(452)	1	1	1	1	1	1	1	1	1	1	1	4	0	1		Z(452)
Y(453)	1	1	4	1	1	1	1	4	1	1	1	1	1	1		Z(453)	367.51	315.53	282.99	315.39	424.09	374.98	258.27	525.99	397.76	344.01	373.25	275.55	317.45	217.73			Y(453)	1	1	1	1	1	1	1	1	1	1	4	1	0	1		Z(453)
Y(454)	1	1	1	1	1	1	4	1	1	1	1	1	1	4		Z(454)	367.74	315.73	284.09	315.69	424.21	375.13	258.99	543.4	397.96	344.18	373.39	275.95	317.91	218.59			Y(454)	1	1	1	1	1	1	1	1	1	1	1	1	0	3		Z(454)
Y(455)	1	1	1	1	1	1	1	1	4	1	1	1	3	1		Z(455)	369.41	315.89	285.04	316.35	424.64	375.47	259.95	544.35	398.79	344.92	373.89	276.28	318.12	220.22			Y(455)	3	1	1	1	4	1	1	1	1	1	1	1	0	1		Z(455)
Y(456)	1	4	1	1	4	1	1	1	1	1	1	1	4	1		Z(456)	369.57	316.59	285.22	317	425.59	375.6	260.08	546.24	399.44	345.05	374.34	276.42	319.19	220.32			Y(456)	4	1	1	1	1	1	1	1	1	1	1	1	0	1		Z(456)
Y(457)	1	4	1	1	1	3	1	1	1	1	1	4	1	1		Z(457)	369.68	317.19	285.32	317.8	426.82	375.81	260.76	547.16	399.71	345.34	374.5	277.99	329.72	220.43			Y(457)	1	1	1	1	1	1	1	1	1	1	1	1	0	4		Z(457)
Y(458)	1	1	1	1	1	4	1	1	1	1	1	1	1	1		Z(458)	369.81	318.04	285.48	318.11	426.92	376.39	260.88	547.8	399.9	345.5	374.69	278.45	330.52	220.53			Y(458)	1	4	3	1	1	1	1	1	1	1	1	1	0	4		Z(458)
Y(459)	1	1	1	1	1	4	1	1	1	1	1	1	1	1		Z(459)	370.15	318.3	286.18	318.83	427.06	386.59	261.01	548.55	400.28	345.67	375.03	278.86	330.78	220.61			Y(459)	1	1	0	1	1	1	1	1	1	1	1	1	0	4		Z(459)
Y(460)	1	1	4	1	1	1	1	1	1	1	1	1	1	1		Z(460)	370.31	318.42	287.19	320.34	427.13	388	261.09	549.07	400.4	345.93	375.16	279.2	330.93	220.79			Y(460)	1	1	0	1	1	1	1	4	1	1	1	1	0	1		Z(460)
Y(461)	1	1	1	1	1	1	1	1	1	1	1	1	1	1		Z(461)	370.44	318.57	287.97	320.48	427.63	388.97	261.4	549.55	400.83	346.1	375.46	279.43	331.26	220.88			Y(461)	1	1	0	1	1	3	4	1	1	1	1	4	0	1		Z(461)
Y(462)	4	1	1	1	1	1	1	1	1	1	1	1	1	1		Z(462)	372.59	319.27	288.09	321.15	427.91	389.09	261.51	550.62	401.02	346.28	375.6	279.56	331.96	221			Y(462)	1	1	0	1	1	4	1	1	1	1	1	1	0	1		Z(462)
Y(463)	1	1	1	1	1	1	1	1	1	1	1	1	1	3		Z(463)	377.69	319.31	288.2	321.56	429.69	389.27	261.74	551.2	402.95	346.55	375.99	281.42	332.11	221.11			Y(463)	1	1	0	1	1	1	1	1	3	1	3	1	0	1		Z(463)
Y(464)	1	1	1	1	1	1	4	1	1	1	1	1	1	1		Z(464)	378.14	319.89	288.33	321.98	430.11	389.67	262.59	551.9	403.23	347.74	377.19	281.58	332.28	221.25			Y(464)	1	4	0	1	1	1	1	1	1	1	4	1	0	1		Z(464)
Y(465)	1	3	1	1	1	1	4	1	1	1	1	1	1	1		Z(465)	378.67	320	288.63	322.38	430.23	389.76	262.99	553.11	403.75	347.92	377.64	281.73	332.54	221.43			Y(465)	1	1	0	1	1	1	1	1	1	1	4	1	0	1		Z(465)
Y(466)	1	4	1	1	1	1	1	4	1	1	1	3	1	1		Z(466)	380.8	320.99	289.01	323.09	430.47	389.83	263.65	553.99	404.04	348.1	378.05	281.84	332.66	221.64			Y(466)	1	1	0	1	1	1	1	1	1	1	1	1	0	1		Z(466)
Y(467)	1	1	4	1	1	1	1	1	1	1	1	1	1	1		Z(467)	381.15	328.33	290.19	323.61	430.59	390.51	263.84	554.91	404.33	348.74	378.41	282.02	332.79	221.84			Y(467)	1	1	0	1	1	1	1	1	4	1	1	1	0	1		Z(467)
Y(468)	1	1	1	1	4	1	1	1	3	1	1	1	1	3		Z(468)	381.27	329.02	291.02	324.27	431.59	390.62	263.96	555.15	404.54	349.93	378.59	282.22	332.98	221.95			Y(468)	1	1	0	1	1	1	1	1	4	1	1	1	0	1		Z(468)
Y(469)	1	1	1	1	1	1	1	1	1	3	1	1	1	1		Z(469)	381.37	329.18	291.18	324.91	432.77	390.75	264.15	555.58	404.8	350.04	378.93	282.44	333.24	222.09			Y(469)	1	1	0	1	1	1	1	1	1	1	1	1	0	1		Z(469)
Y(470)	1	1	1	1	1	1	1	1	1	0	1	1	1	1		Z(470)	386.77	329.34	291.29	325.38	432.89	391.41	264.4	556.04	404.91	0	379.33	282.64	333.36	222.2			Y(470)	1	1	0	1	1	3	4	1	1	1	1	1	0	1		Z(470)
Y(471)	1	1	1	1	4	1	1	1	1	0	3	1	1	1		Z(471)	390.58	330	291.55	325.95	433.99	392.32	264.64	556.6	405.08	0	379.44	283.49	333.52	222.31			Y(471)	1	1	0	1	1	4	1	1	1	1	1	1	0	1		Z(471)
Y(472)	1	4	1	1	1	1	1	1	1	0	4	1	3	1		Z(472)	390.71	330.79	291.66	326.33	435.07	392.57	264.91	556.93	405.6	0	380.19	283.94	333.63	222.72			Y(472)	1	1	0	1	1	1	1	1	1	1	1	1	0	1		Z(472)
Y(473)	1	1	1	3	1	1	1	1	4	0	1	1	4	1		Z(473)	390.93	332.02	291.72	326.44	435.18	392.96	265.05	557.48	406.59	0	391.26	284.08	334.39	222.93			Y(473)	1	1	0	1	1	1	1	1	1	1	1	1	0	1		Z(473)
Y(474)	1	1	1	4	1	1	1	3	1	0	1	1	1	1		Z(474)	391.1	332.31	292.04	327.39	435.33	393.75	265.2	557.59	422.09	0	392.05	284.56	347.38	223.28			Y(474)	1	1	0	1	1	1	1	1	1	1	1	1	0	1		Z(474)
Y(475)	1	1	1	1	1	1	1	4	1	0	1	4	1	1		Z(475)	391.43	332.45	292.16	333.4	435.6	393.87	265.32	558.39	422.4	0	392.3	285.59	348.13	223.47			Y(475)	1	1	0	1	1	1	1	1	4	1	1	1	0	1		Z(475)
Y(476)	1	1	1	1	1	1	1	1	1	0	1	4	1	4		Z(476)	393.94	333.32	292.35	333.86	435.94	394.72	265.45	576.65	422.7	0	392.87	289.79	348.42	224.39			Y(476)	1	1	0	4	3	1	1	1	1	1	1	1	0	1		Z(476)
Y(477)	1	1	1	1	1	1	1	1	1	0	1	1	1	4		Z(477)	394.09	333.62	292.73	334.66	436.01	394.83	265.8	577.58	422.93	0	393.01	290.5	348.52	229.59			Y(477)	1	1	0	4	4	1	1	1	1	1	1	1	0	1		Z(477)
Y(478)	1	1	1	1	1	4	4	1	1	0	1	1	1	1		Z(478)	394.24	334.31	292.9	334.8	436.13	395.79	266.79	577.74	424.1	0	393.63	290.64	348.64	241.7			Y(478)	1	1	0	4	1	1	1	1	1	1	1	1	0	1		Z(478)
Y(479)	1	1	4	1	1	1	4	1	1	0	1	1	1	1		Z(479)	394.36	334.65	293.99	335.56	436.39	398.04	267.19	579.04	425.81	0	396.29	290.89	349.12	241.98			Y(479)	1	1	0	4	1	1	1	1	1	1	3	3	0	3		Z(479)
Y(480)	3	3	1	1	4	1	1	1	1	0	1	1	1	1		Z(480)	394.47	334.76	295.52	335.68	437.39	398.48	268.24	579.41	425.95	0	396.44	290.97	350.12	242.11			Y(480)	1	1	0	1	1	1	1	1	1	1	4	1	0	1		Z(480)
Y(481)	4	4	1	1	1	1	1	1	1	0	1	1	1	1		Z(481)	395.79	335.59	295.62	336.04	438.32	398.58	268.33	579.64	426.44	0	397.29	291.1	350.23	242.29			Y(481)	1	1	0	1	1	1	3	4	1	1	4	4	0	1		Z(481)
Y(482)	1	1	1	1	1	1	1	1	1	0	1	1	3	1		Z(482)	403.47	342.37	295.7	336.76	438.43	398.69	268.43	580.08	427.31	0	397.69	291.23	350.34	242.6			Y(482)	1	1	0	1	1	1	4	1	4	1	1	4	0	1		Z(482)
Y(483)	1	1	1	1	1	1	1	3	4	0	1	1	4	1		Z(483)	403.56	342.54	295.91	337.41	438.72	399.35	268.61	580.19	428.59	0	398.39	291.36	351.39	242.77			Y(483)	1	4	0	1	1	3	4	1	1	3	1	1	0	1		Z(483)
Y(484)	1	1	4	1	4	1	1	4	1	0	1	1	1	4		Z(484)	403.71	342.67	296.59	337.56	439.99	399.44	268.74	580.99	429.2	0	398.51	291.75	371.14	244.59			Y(484)	1	4	0	1	1	4	1	1	1	4	1	1	0	3		Z(484)
Y(485)	1	1	1	1	1	1	1	4	1	0	1	1	1	1		Z(485)	403.85	343.32	297.4	338.01	440.83	399.53	268.86	599.79	429.73	0	398.66	291.86	372.1	246.28			Y(485)	1	1	0	1	1	1	1	1	1	1	1	1	0	1		Z(485)
Y(486)	1	1	1	1	1	1	1	1	1	0	1	1	1	1		Z(486)	404.35	343.44	297.5	338.44	441.11	400.13	269.14	601.75	430.08	0	399.62	291.99	374.07	246.41			Y(486)	1	1	0	1	1	1	1	1	1	1	1	1	0	1		Z(486)
Y(487)	1	1	1	1	1	1	1	1	1	0	1	4	1	1		Z(487)	404.46	343.56	297.6	338.95	441.45	400.37	269.39	603.23	430.16	0	401.04	293.39	374.39	246.53			Y(487)	1	1	0	1	1	1	1	1	1	1	1	1	0	4		Z(487)
Y(488)	1	1	1	1	1	1	4	1	1	0	1	1	1	1		Z(488)	405.1	343.73	297.83	339.66	441.69	400.58	270.59	603.31	430.32	0	401.64	294.11	374.49	246.69			Y(488)	1	1	0	1	1	1	1	1	1	1	1	4	0	4		Z(488)
Y(489)	1	4	1	1	1	1	4	1	1	0	1	1	1	1		Z(489)	405.25	344.59	298.01	340.18	441.94	400.69	270.99	603.94	431.06	0	401.95	294.3	374.66	246.81			Y(489)	1	1	0	1	1	1	1	1	1	1	1	1	0	1		Z(489)
Y(490)	1	1	1	1	1	1	1	1	1	0	1	1	1	1		Z(490)	405.87	346.22	298.13	340.47	443.72	401.28	271.48	604.61	432.92	0	402.1	294.51	375.04	247.04			Y(490)	1	1	0	1	4	1	1	1	1	1	3	1	0	1		Z(490)
Y(491)	3	1	1	1	1	1	1	1	1	0	1	1	1	1		Z(491)	405.98	346.31	298.39	340.73	444.19	402.15	271.71	605.17	433.39	0	403.59	294.62	375.18	247.29			Y(491)	1	1	0	1	1	1	1	1	3	1	0	1	0	1		Z(491)
Y(492)	4	1	4	1	1	1	1	1	3	0	1	1	1	1		Z(492)	406.99	346.41	299.59	340.99	444.64	402.73	271.81	605.76	433.5	0	403.71	294.69	375.3	247.77			Y(492)	1	1	0	1	1	1	1	1	1	1	0	1	0	1		Z(492)
Y(493)	4	1	1	1	3	1	1	1	1	0	1	1	1	1		Z(493)	417.19	346.51	300.51	341.68	444.75	403.29	272.05	606.42	434.46	0	403.85	294.8	375.44	251.8			Y(493)	1	1	0	1	1	1	1	1	4	1	0	4	0	1		Z(493)
Y(494)	1	1	1	1	1	1	1	1	1	0	1	1	1	1		Z(494)	418.29	346.65	300.61	342.04	444.92	404.22	272.26	607.23	434.65	0	404.79	295.01	375.79	251.93			Y(494)	1	1	0	1	1	1	1	1	1	1	0	1	0	1		Z(494)
Y(495)	1	1	1	1	1	1	1	1	1	0	1	4	1	1		Z(495)	418.6	346.75	300.65	342.49	445.74	404.8	272.44	607.71	434.79	0	404.95	296.39	375.98	252.05			Y(495)	1	1	0	1	1	1	4	1	1	1	0	1	0	1		Z(495)
Y(496)	1	1	1	1	1	1	1	4	3	0	1	1	1	1		Z(496)	418.69	346.88	301	342.96	446.04	405.45	272.56	609.99	434.9	0	405.29	297.01	376.85	252.17			Y(496)	1	1	0	1	1	1	1	1	1	1	0	1	0	1		Z(496)
Y(497)	1	1	1	1	4	1	1	1	4	0	1	1	1	1		Z(497)	418.97	347.19	301.11	343.57	446.59	406.04	272.73	611	435.59	0	406.86	297.32	377.18	252.33			Y(497)	1	4	0	1	4	1	1	1	1	3	0	1	0	1		Z(497)
Y(498)	1	1	1	1	1	1	1	1	4	0	1	1	1	1		Z(498)	419.07	347.68	301.22	344.22	465.29	406.15	273.09	611.68	440.79	0	407.32	297.47	377.45	252.47			Y(498)	1	1	0	1	1	1	1	1	1	4	0	1	0	1		Z(498)
Y(499)	1	1	1	1	1	1	4	1	4	0	1	1	1	1		Z(499)	419.42	347.81	302.79	344.86	465.43	407.03	273.79	612.38	459.99	0	407.45	297.57	377.56	252.65			Y(499)	1	1	0	1	1	1	1	1	1	4	0	1	0	4		Z(499)
Y(500)	1	1	1	1	1	1	1	1	4	0	1	1	1	1		Z(500)	419.76	348.35	302.91	345.49	465.54	408.86	274.34	612.92	461.79	0	410.58	297.72	377.68	252.8			Y(500)	1	1	0	3	1	1	1	1	1	1	0	1	0	1		Z(500)
Y(501)	1	4	1	3	1	1	1	1	1	0	1	1	1	1		Z(501)	422.24	349.19	303.12	345.6	465.66	408.97	274.43	613.44	462.68	0	410.95	298.38	377.82	253.03			Y(501)	1	1	0	4	1	1	1	1	1	1	0	1	0	1		Z(501)
Y(502)	1	1	1	4	1	4	1	1	1	0	1	1	1	3		Z(502)	422.77	350.31	303.25	346.59	465.77	409.79	275.35	613.9	462.86	0	412.6	299.99	377.97	253.14			Y(502)	1	1	0	1	1	1	1	1	1	1	0	1	0	1		Z(502)
Y(503)	1	1	1	1	1	1	4	1	1	0	1	1	1	1		Z(503)	422.92	350.43	303.39	353.37	466.04	411.88	276.59	614.16	463.21	0	412.73	300.35	378.44	253.26			Y(503)	3	1	0	1	1	1	1	4	1	1	0	4	0	1		Z(503)
Y(504)	1	1	1	1	1	1	1	1	1	0	1	1	1	1		Z(504)	423.15	352.09	303.83	354.01	468.04	412.29	277.51	614.68	463.34	0	412.99	300.52	378.63	253.73			Y(504)	4	1	0	1	1	1	1	4	3	1	0	1	0	1		Z(504)
Y(505)	1	1	1	1	1	1	1	1	1	0	1	1	1	1		Z(505)	425.71	352.3	304.04	354.12	468.24	412.37	277.78	615.09	463.78	0	413.38	300.72	379.06	253.87			Y(505)	1	1	0	1	4	1	1	4	1	1	0	1	0	1		Z(505)
Y(506)	1	1	1	1	3	1	1	1	1	0	1	1	3	4		Z(506)	426.26	353.15	306.8	354.64	468.35	412.53	278.03	615.74	463.89	0	413.59	301	379.17	254.79			Y(506)	1	1	0	1	1	1	4	4	4	1	0	1	0	1		Z(506)
Y(507)	1	1	1	1	1	1	1	1	1	0	1	1	4	1		Z(507)	426.4	353.27	306.98	355.11	468.73	413.1	278.16	616.25	464.29	0	413.74	301.12	380.19	261.25			Y(507)	1	1	0	1	1	1	1	1	4	3	0	1	0	1		Z(507)
Y(508)	1	1	1	1	1	1	1	1	1	0	1	1	1	1		Z(508)	426.54	353.4	307.11	355.44	468.89	413.79	278.3	616.77	464.5	0	415.92	301.45	392.85	261.43			Y(508)	4	1	0	1	1	1	1	1	1	4	0	1	0	1		Z(508)
Y(509)	1	1	1	1	1	1	4	1	1	0	1	1	1	1		Z(509)	427.58	355.61	307.22	355.77	469.03	414.38	279.59	617.11	464.66	0	416.04	301.58	393.63	261.87			Y(509)	1	1	0	1	1	1	1	1	1	1	0	4	0	1		Z(509)
Y(510)	1	1	1	1	1	1	1	1	1	0	1	1	1	1		Z(510)	429.76	356.56	307.72	356.43	469.14	414.94	280.48	617.24	464.95	0	416.16	301.85	393.78	261.99			Y(510)	1	4	0	1	4	1	1	1	1	1	0	1	0	1		Z(510)
Y(511)	1	1	1	1	1	1	1	1	1	0	1	4	1	1		Z(511)	430.11	356.7	308.71	356.81	469.33	415.61	280.85	617.85	466.77	0	416.33	303.19	394.19	262.12			Y(511)	1	1	0	1	1	1	1	1	1	1	0	1	0	1		Z(511)
Y(512)	1	1	1	1	1	1	1	1	1	0	1	1	1	1		Z(512)	430.39	356.82	308.95	357.49	469.44	415.9	281.07	618.93	466.88	0	418.08	303.67	394.34	262.23			Y(512)	1	1	0	1	1	1	1	1	1	1	0	1	0	1		Z(512)
Y(513)	1	1	1	3	4	1	1	1	1	0	1	1	1	1		Z(513)	430.6	357.07	310.98	357.6	470.39	416.06	281.22	619.54	467.01	0	418.31	303.87	394.52	262.38			Y(513)	1	1	0	3	1	4	4	1	1	1	0	1	0	1		Z(513)
Y(514)	1	4	1	4	1	1	1	1	1	0	1	1	1	3		Z(514)	432.26	357.99	311.11	358.59	496.4	416.86	281.36	620.21	467.3	0	418.76	304.08	396.36	262.49			Y(514)	1	1	0	4	1	1	1	1	1	1	0	1	0	4		Z(514)
Y(515)	1	1	1	1	1	1	1	1	1	0	1	1	1	1		Z(515)	432.68	359.04	311.32	366.85	496.72	416.98	281.51	620.91	467.61	0	418.96	304.19	396.53	262.76			Y(515)	1	1	0	1	1	1	1	3	1	1	0	1	0	1		Z(515)
Y(516)	1	1	1	1	1	1	1	1	1	0	1	1	1	1		Z(516)	432.93	359.17	311.58	367.43	496.86	417.59	281.68	622.51	469.14	0	420.1	304.37	396.7	262.92			Y(516)	1	1	0	1	1	1	4	4	1	1	0	1	0	1		Z(516)
Y(517)	1	1	1	1	1	1	1	1	1	0	1	1	3	1		Z(517)	433.33	359.43	311.93	367.74	497.17	417.7	281.81	622.65	469.54	0	420.3	304.77	396.81	263.1			Y(517)	1	1	0	1	4	1	1	1	1	1	0	1	0	1		Z(517)
Y(518)	1	1	1	1	1	1	1	1	1	0	1	4	0	1		Z(518)	435.21	360.22	312.06	368.21	497.65	418.23	281.98	623.43	469.7	0	420.42	306.59	0	263.22			Y(518)	1	1	0	1	4	1	1	1	1	1	0	1	0	1		Z(518)
Y(519)	1	1	1	1	1	1	1	1	1	0	3	1	0	4		Z(519)	435.36	360.37	312.18	368.52	497.84	418.55	282.45	624.44	469.84	0	420.63	307.06	0	264.39			Y(519)	1	1	0	1	1	1	1	1	1	1	0	1	0	1		Z(519)
Y(520)	1	1	1	1	4	3	4	1	1	0	4	1	0	4		Z(520)	435.51	360.5	312.45	368.92	498.79	418.76	283.99	625.31	470.24	0	421.59	307.14	0	269.79			Y(520)	1	1	0	1	1	1	1	1	1	1	0	1	0	1		Z(520)
Y(521)	1	4	1	1	1	4	1	1	1	0	4	1	0	1		Z(521)	435.63	361.19	312.76	369.45	499.47	419.59	285.2	625.76	470.57	0	431.99	307.29	0	271.67			Y(521)	3	1	0	1	1	3	1	1	1	1	0	4	0	1		Z(521)
Y(522)	1	4	1	1	1	1	1	1	1	0	1	1	0	1		Z(522)	435.76	361.79	312.99	370.5	499.64	430.82	285.6	625.92	471.27	0	433.54	307.41	0	271.82			Y(522)	4	1	0	3	1	4	1	1	1	1	0	1	0	3		Z(522)
Y(523)	4	1	1	1	1	1	1	4	1	0	1	1	0	1		Z(523)	436.79	362.7	313.12	370.8	499.75	431.52	285.8	628.19	472.99	0	435.55	307.47	0	271.95			Y(523)	1	1	0	0	1	0	1	1	1	3	0	1	0	1		Z(523)
Y(524)	1	1	1	1	1	1	1	1	1	0	1	1	0	1		Z(524)	437.95	362.88	315.23	371.02	500.41	431.66	286.24	629.46	473.69	0	435.66	307.56	0	272.04			Y(524)	1	1	0	0	1	0	1	1	1	4	0	1	0	1		Z(524)
Y(525)	1	1	1	1	1	1	1	1	1	0	1	1	0	1		Z(525)	438.44	363.27	315.95	371.14	500.61	431.77	286.37	630.23	474.1	0	435.82	307.88	0	272.19			Y(525)	1	1	0	0	1	0	4	1	1	1	0	1	0	1		Z(525)
Y(526)	1	1	3	1	4	1	1	1	1	0	1	1	0	1		Z(526)	439.19	363.8	316.06	371.26	501.59	432.16	286.51	631.28	474.4	0	436.06	308.03	0	272.33			Y(526)	1	1	0	0	1	0	1	1	1	1	0	1	0	1		Z(526)
Y(527)	1	1	4	1	1	1	1	1	1	0	1	1	0	1		Z(527)	439.31	363.95	317.19	371.63	502.5	432.26	286.63	631.88	474.92	0	436.2	308.48	0	272.6			Y(527)	1	3	0	0	1	0	1	1	1	1	0	1	0	1		Z(527)
Y(528)	4	1	1	1	1	1	1	1	1	0	1	1	0	3		Z(528)	440.39	364.34	330.19	372.08	502.63	432.42	286.78	632.34	476.59	0	436.54	309.91	0	272.71			Y(528)	4	1	0	0	1	0	1	1	1	1	0	1	0	1		Z(528)
Y(529)	1	1	1	1	1	1	1	1	1	0	1	1	0	1		Z(529)	441.23	364.44	330.39	372.2	502.81	432.92	287.41	633.11	477.05	0	436.84	310.41	0	272.86			Y(529)	1	1	0	0	1	0	1	1	1	1	0	1	0	1		Z(529)
Y(530)	1	1	1	1	1	1	1	1	1	0	3	1	0	1		Z(530)	441.6	364.56	330.54	372.57	502.92	433.03	287.82	633.53	477.17	0	436.95	310.66	0	272.99			Y(530)	1	3	0	0	1	0	1	1	1	1	0	4	0	1		Z(530)
Y(531)	1	1	1	1	1	1	1	1	1	0	4	1	0	4		Z(531)	442.07	364.84	330.69	373.42	503.05	433.58	288.2	634.01	477.31	0	438.19	310.9	0	274.19			Y(531)	1	1	0	0	4	0	1	1	1	1	0	1	0	4		Z(531)
Y(532)	1	1	1	1	1	1	4	1	1	0	4	1	0	1		Z(532)	442.37	364.99	331.09	374.24	503.34	433.97	288.99	634.49	477.71	0	438.59	311.01	0	284.47			Y(532)	1	4	0	0	1	0	1	1	1	3	0	1	0	4		Z(532)
Y(533)	1	1	4	3	1	1	1	1	1	0	4	1	0	1		Z(533)	444.04	365.14	333.39	374.35	503.48	434.23	290.41	635.8	477.98	0	450.19	312.75	0	284.62			Y(533)	1	4	0	0	1	0	1	4	3	0	0	1	0	1		Z(533)
Y(534)	1	4	1	4	4	1	1	1	1	0	1	1	0	1		Z(534)	444.54	365.79	334.14	374.99	504.79	434.45	290.49	636.35	478.48	0	452.78	313	0	284.75			Y(534)	1	1	0	0	1	0	4	4	4	0	0	1	0	1		Z(534)
Y(535)	1	1	1	1	1	1	1	1	1	0	1	3	0	1		Z(535)	444.64	367.07	334.23	382.38	505.66	434.79	290.61	637.08	478.6	0	453.14	313.11	0	284.83			Y(535)	1	1	0	0	1	0	1	1	1	0	0	1	0	1		Z(535)
Y(536)	1	1	1	1	1	1	1	1	1	0	1	1	0	1		Z(536)	444.79	367.16	334.41	384.93	505.87	435	290.98	637.65	480.79	0	453.3	313.58	0	284.96			Y(536)	1	1	0	0	1	0	1	1	1	0	0	1	0	1		Z(536)
Y(537)	4	1	1	1	1	1	1	1	1	0	1	1	0	1		Z(537)	445.99	367.28	334.48	385.68	506.07	435.12	291.06	638.14	480.93	0	453.66	313.74	0	285.31			Y(537)	1	1	0	0	1	0	1	1	1	0	0	1	0	1		Z(537)
Y(538)	1	1	1	1	1	1	1	1	1	0	1	1	0	1		Z(538)	446.54	367.34	334.81	386.67	506.18	435.69	291.39	638.67	481.12	0	453.78	314.09	0	285.42			Y(538)	1	1	0	0	4	0	1	1	1	0	0	1	0	1		Z(538)
Y(539)	1	1	1	1	1	1	1	4	1	0	1	4	0	1		Z(539)	446.76	368	335.3	387.09	506.31	435.8	291.51	640.59	481.68	0	453.99	315.19	0	285.64			Y(539)	1	1	0	0	1	0	1	1	1	0	0	1	0	1		Z(539)
Y(540)	1	4	1	1	1	1	1	1	4	0	1	4	0	4		Z(540)	447.29	369.59	335.45	387.57	506.68	436.43	291.67	642.16	482.99	0	454.72	318.79	0	287.59			Y(540)	1	1	0	0	1	0	1	1	1	0	0	1	0	4		Z(540)
Y(541)	1	1	1	1	1	1	1	1	1	0	1	1	0	1		Z(541)	447.43	370.52	336.09	387.9	506.78	437.09	291.99	642.32	483.87	0	454.85	319.32	0	289.14			Y(541)	1	1	0	0	1	0	4	1	1	0	0	1	0	4		Z(541)
Y(542)	4	1	1	1	1	1	1	1	1	0	1	1	0	1		Z(542)	448.39	371.1	336.22	388.15	507.07	437.27	292.32	642.45	484.17	0	455.43	319.45	0	289.26			Y(542)	1	1	0	0	1	0	1	1	1	0	0	3	0	1		Z(542)
Y(543)	1	1	3	1	1	1	1	1	1	0	1	1	0	1		Z(543)	449.19	371.95	336.33	388.63	507.33	438.73	292.47	642.58	484.39	0	456.03	319.57	0	289.46			Y(543)	1	1	0	0	1	0	1	1	1	0	0	1	0	1		Z(543)
Y(544)	1	1	4	1	1	1	1	1	1	0	1	1	0	1		Z(544)	449.47	372.04	337.19	388.98	509.09	438.98	292.6	642.94	484.73	0	456.41	319.91	0	289.55			Y(544)	1	1	0	0	4	0	1	1	1	0	0	4	0	1		Z(544)
Y(545)	1	4	1	1	1	3	1	1	1	0	1	1	0	1		Z(545)	449.58	373.19	352.47	391.21	509.34	439.09	292.74	643.45	484.87	0	456.73	320.02	0	289.72			Y(545)	1	1	0	0	1	0	4	3	1	0	0	4	0	1		Z(545)
Y(546)	1	1	1	1	1	4	1	1	1	0	1	1	0	1		Z(546)	449.67	374.3	352.64	393.22	509.46	439.79	293.02	643.51	487.33	0	456.85	320.61	0	289.82			Y(546)	1	1	0	0	1	0	1	4	1	0	0	1	0	1		Z(546)
Y(547)	1	1	1	1	1	1	1	3	1	0	1	1	0	1		Z(547)	449.68	374.87	353.52	393.76	509.59	453.93	293.16	643.62	487.6	0	457.18	320.78	0	289.89			Y(547)	1	1	0	0	1	0	1	1	1	0	0	1	0	1		Z(547)
Y(548)	4	1	1	1	1	1	1	4	1	0	1	1	0	1		Z(548)	450.99	376.77	353.8	395.54	511.81	454.88	293.31	644.19	487.85	0	457.61	321	0	290.08			Y(548)	1	1	0	0	1	0	1	1	1	0	0	1	0	1		Z(548)
Y(549)	1	1	1	1	1	1	3	4	1	0	1	1	0	1		Z(549)	451.56	377.35	353.96	397.98	511.92	455.45	293.42	658.59	487.98	0	457.8	321.2	0	290.26			Y(549)	1	1	0	0	1	0	1	1	3	0	0	4	0	1		Z(549)
Y(550)	1	1	1	1	1	1	4	1	1	0	1	1	0	1		Z(550)	452.07	377.47	354.25	398.29	512.18	455.52	294.39	662.56	488.15	0	458.24	321.52	0	290.75			Y(550)	1	1	0	0	1	0	1	1	1	0	0	1	0	1		Z(550)
Y(551)	1	1	1	1	1	1	4	1	1	0	1	1	0	1		Z(551)	452.16	377.64	354.81	398.59	512.68	456.04	300.59	662.8	488.28	0	459.19	321.75	0	290.97			Y(551)	1	4	0	0	1	0	1	1	1	0	0	1	0	1		Z(551)
Y(552)	1	1	1	1	1	1	1	1	1	0	1	1	0	1		Z(552)	452.81	377.79	357.15	399.06	512.97	456.14	301.81	662.92	488.69	0	459.44	323.52	0	291.12			Y(552)	3	4	0	0	1	0	1	1	1	0	0	1	0	1		Z(552)
Y(553)	1	1	1	1	1	1	1	1	4	0	1	1	0	4		Z(553)	452.91	378.08	357.78	400	515.81	456.74	301.93	663.85	489.59	0	459.59	323.72	0	291.79			Y(553)	4	1	0	0	1	0	1	4	4	0	0	1	0	1		Z(553)
Y(554)	1	4	1	1	1	3	1	1	1	0	1	1	0	4		Z(554)	454.39	379.19	357.92	400.59	515.94	456.85	302.02	665.6	490.69	0	459.73	323.94	0	292.39			Y(554)	1	1	0	0	4	0	1	1	4	0	0	1	0	1		Z(554)
Y(555)	1	4	1	1	4	4	1	1	1	0	1	1	0	1		Z(555)	454.58	379.79	359.21	400.77	517.19	457.59	302.14	666.74	491.03	0	460.71	324.13	0	293.1			Y(555)	1	1	0	0	1	0	1	1	1	0	0	1	0	1		Z(555)
Y(556)	1	1	1	1	1	4	1	1	1	0	1	1	0	1		Z(556)	454.9	381.24	359.44	401.45	518.44	470.99	302.24	667.25	491.33	0	460.86	324.25	0	293.24			Y(556)	1	1	0	0	1	0	3	1	1	0	0	1	0	1		Z(556)
Y(557)	1	1	1	1	1	4	1	4	1	0	1	4	0	1		Z(557)	455.01	381.32	359.57	401.73	518.53	473.39	302.44	668.19	491.89	0	461.05	325.39	0	293.37			Y(557)	1	1	0	0	1	0	1	1	1	0	0	1	0	1		Z(557)
Y(558)	1	1	1	1	1	1	1	1	4	0	1	1	0	1		Z(558)	455.13	381.5	359.69	402.01	518.64	475.1	302.54	669.58	493.59	0	461.4	325.83	0	293.59			Y(558)	1	1	0	0	1	0	1	1	1	0	0	4	0	4		Z(558)
Y(559)	1	1	1	1	1	1	1	1	1	0	1	1	0	1		Z(559)	455.77	381.57	360.04	402.27	518.79	476.1	302.77	669.74	494.49	0	461.56	326.06	0	293.68			Y(559)	1	1	0	0	1	0	1	1	1	0	0	1	0	1		Z(559)
Y(560)	1	1	1	1	1	1	1	1	1	0	1	1	0	1		Z(560)	456.21	383.76	360.2	403.18	520.72	476.23	302.89	670.18	494.82	0	461.85	326.28	0	293.8			Y(560)	1	3	0	0	1	0	1	1	1	0	0	1	0	1		Z(560)
Y(561)	1	1	1	1	1	1	1	1	1	0	1	1	0	1		Z(561)	458.38	384.5	360.34	403.42	521.01	476.52	303.06	670.54	495.12	0	462.17	326.49	0	293.89			Y(561)	1	1	0	0	1	0	4	1	1	0	0	1	0	1		Z(561)
Y(562)	1	4	1	1	1	1	4	1	1	0	1	1	0	1		Z(562)	458.5	385.39	362.56	404.08	521.23	477.14	303.99	671.24	495.25	0	463.4	326.72	0	294.01			Y(562)	1	1	0	0	1	0	4	1	1	0	0	1	0	1		Z(562)
Y(563)	1	1	1	4	4	1	1	1	1	0	1	1	0	1		Z(563)	458.63	386.42	362.67	405.99	522.59	477.38	304.9	671.61	495.42	0	463.7	326.99	0	294.15			Y(563)	1	1	0	0	4	0	1	1	1	0	0	1	0	1		Z(563)
Y(564)	1	1	1	1	1	1	1	1	1	0	3	1	0	1		Z(564)	458.75	386.53	362.79	407.96	523.55	477.63	305	672.16	495.49	0	463.81	327.1	0	294.55			Y(564)	1	1	0	0	4	0	1	1	1	0	0	1	0	1		Z(564)
Y(565)	1	1	1	1	1	1	1	1	1	0	4	1	0	1		Z(565)	458.88	386.69	363.01	408.94	523.78	478.23	305.06	672.71	495.86	0	464.79	327.24	0	294.68			Y(565)	1	1	0	0	1	0	1	1	1	0	0	1	0	1		Z(565)
Y(566)	1	1	1	1	1	1	1	1	3	0	1	4	0	1		Z(566)	461.05	387.35	363.13	409.89	523.91	478.34	305.5	673.36	496.07	0	476.04	328.19	0	294.87			Y(566)	3	1	0	0	1	0	1	1	3	0	0	1	0	1		Z(566)
Y(567)	1	1	1	1	1	1	1	1	4	0	1	1	0	1		Z(567)	461.48	387.45	363.36	410.14	524.05	478.49	305.84	673.79	497.39	0	476.27	328.72	0	295			Y(567)	4	1	0	0	1	0	1	1	1	0	0	1	0	3		Z(567)
Y(568)	1	1	1	1	1	1	1	1	1	0	1	1	0	1		Z(568)	461.59	388.6	363.49	410.49	524.19	479	305.99	674.46	506.01	0	476.34	328.88	0	295.29			Y(568)	1	4	0	0	1	0	4	1	1	0	0	1	0	1		Z(568)
Y(569)	1	1	1	1	4	1	1	1	1	0	1	1	0	1		Z(569)	463.38	388.79	365.23	412.89	526.19	479.13	306.1	675.15	506.07	0	477.01	328.98	0	295.5			Y(569)	1	1	0	0	1	0	1	4	1	0	0	1	0	4		Z(569)
Y(570)	3	4	1	1	1	1	1	4	1	0	1	1	0	1		Z(570)	463.59	389.99	365.4	413.52	527.5	479.33	306.23	676.39	506.44	0	477.89	329.07	0	295.63			Y(570)	1	1	0	0	1	0	1	1	1	0	0	1	0	4		Z(570)
Y(571)	4	1	1	1	1	1	1	1	1	0	1	1	0	1		Z(571)	464.79	390.63	365.53	413.88	528.01	479.58	306.35	677.43	506.55	0	478.1	329.53	0	295.75			Y(571)	1	1	0	0	1	0	1	1	3	0	0	1	0	1		Z(571)
Y(572)	1	1	1	1	1	1	1	1	1	0	1	1	0	1		Z(572)	468.88	390.72	365.66	414.21	530.21	479.98	306.53	677.58	506.69	0	478.53	329.74	0	295.87			Y(572)	1	1	0	0	1	0	1	1	1	0	0	1	0	1		Z(572)
Y(573)	1	1	3	1	1	1	4	1	1	0	1	1	0	1		Z(573)	469.04	391.51	365.77	414.97	530.39	480.24	307.39	678.11	506.92	0	478.93	329.94	0	296.03			Y(573)	1	1	0	0	3	0	1	1	1	0	0	1	0	1		Z(573)
Y(574)	1	1	1	1	1	1	1	1	1	0	3	1	0	4		Z(574)	470.14	391.67	365.98	415.48	530.67	480.35	308.2	678.58	507.08	0	479.04	330.43	0	296.59			Y(574)	1	1	0	0	1	0	1	1	1	0	0	1	0	1		Z(574)
Y(575)	1	1	1	1	1	1	1	1	3	0	0	1	0	1		Z(575)	470.52	391.88	366.13	416.18	530.83	480.46	308.33	679.05	507.19	0	0	330.61	0	297.71			Y(575)	3	1	0	0	1	0	1	1	4	0	0	1	0	1		Z(575)
Y(576)	1	1	1	1	1	1	1	1	1	0	0	1	0	1		Z(576)	470.93	392.03	366.38	416.62	531.72	481.09	308.42	679.6	507.99	0	0	332.34	0	297.83			Y(576)	0	1	0	0	1	0	1	4	4	0	0	4	0	1		Z(576)
Y(577)	1	1	4	1	1	1	1	1	4	0	0	1	0	1		Z(577)	471.06	392.54	367.39	417.83	531.95	481.34	309.03	680.18	509.19	0	0	332.62	0	297.95			Y(577)	0	1	0	0	1	0	1	1	1	0	0	1	0	1		Z(577)
Y(578)	4	1	1	1	4	1	1	1	1	0	0	1	0	1		Z(578)	472.39	394.16	380.32	419.15	532.99	481.69	309.15	680.63	522.02	0	0	333.06	0	298.06			Y(578)	0	4	0	0	4	0	1	1	1	0	0	1	0	1		Z(578)
Y(579)	1	4	1	1	1	1	1	1	1	0	0	1	0	1		Z(579)	473.61	395.39	380.82	419.78	534.35	482.32	309.26	682.17	522.5	0	0	333.6	0	298.37			Y(579)	0	1	0	0	1	0	1	1	1	0	0	1	0	4		Z(579)
Y(580)	1	1	1	1	1	1	1	1	1	0	0	1	0	1		Z(580)	474.07	396.72	380.94	420.67	534.47	482.94	309.54	682.85	522.79	0	0	333.79	0	298.46			Y(580)	0	1	0	0	1	0	3	1	1	0	0	1	0	1		Z(580)
Y(581)	1	1	1	1	1	1	3	1	1	0	0	1	0	1		Z(581)	474.26	397.12	381.23	421.14	534.91	483.07	309.65	683.49	523.16	0	0	334.08	0	298.65			Y(581)	0	1	0	0	1	0	1	1	1	0	0	1	0	1		Z(581)
Y(582)	1	1	1	1	4	1	1	1	1	0	0	1	0	1		Z(582)	474.33	397.92	381.47	421.51	535.79	483.9	309.8	684.75	523.3	0	0	334.2	0	299.02			Y(582)	0	1	0	0	1	0	1	1	1	0	0	1	0	1		Z(582)
Y(583)	1	1	1	1	1	1	1	1	1	0	0	1	0	4		Z(583)	475.34	398.05	381.63	422.7	536.7	484.01	309.95	685.34	523.55	0	0	334.35	0	299.99			Y(583)	0	1	0	0	1	0	1	1	1	0	0	1	0	1		Z(583)
Y(584)	1	1	1	1	1	3	1	1	1	0	0	1	0	1		Z(584)	475.63	398.43	381.88	423.65	537.11	484.12	310.22	685.94	524.13	0	0	334.48	0	300.95			Y(584)	0	4	0	0	1	0	3	1	1	0	0	4	0	1		Z(584)
Y(585)	4	1	4	1	1	4	1	1	1	0	0	1	0	1		Z(585)	476.59	399	383.19	424.2	537.37	484.79	310.51	686.6	524.57	0	0	334.81	0	301.03			Y(585)	0	1	0	0	1	0	4	1	1	0	0	1	0	1		Z(585)
Y(586)	1	1	1	1	1	4	4	1	1	0	0	1	0	1		Z(586)	477.23	399.12	383.69	424.66	537.47	496.99	311.19	687.03	526.23	0	0	335.15	0	301.17			Y(586)	0	1	0	0	1	0	4	1	1	0	0	1	0	1		Z(586)
Y(587)	1	1	1	1	1	1	4	1	1	0	0	1	0	1		Z(587)	477.58	399.3	383.78	425.01	537.62	498.83	316.79	688.57	526.35	0	0	335.31	0	301.32			Y(587)	0	1	0	0	1	0	4	1	1	0	0	1	0	1		Z(587)
Y(588)	1	1	1	3	1	1	1	1	1	0	0	1	0	1		Z(588)	479.17	399.46	384.02	425.22	537.71	498.96	318.17	689.45	526.7	0	0	337.31	0	301.43			Y(588)	0	1	0	0	1	0	4	1	3	0	0	1	0	1		Z(588)
Y(589)	1	1	1	4	1	1	1	1	1	0	0	1	0	1		Z(589)	479.33	399.62	384.12	425.99	537.8	499.5	318.21	690.15	526.82	0	0	337.49	0	301.5			Y(589)	0	1	0	0	1	0	4	1	1	0	0	1	0	1		Z(589)
Y(590)	1	1	1	1	1	1	1	1	1	0	0	1	0	1		Z(590)	479.83	399.82	384.26	432.42	538.16	499.73	318.39	690.73	527.12	0	0	337.6	0	301.88			Y(590)	0	1	0	0	1	0	1	4	1	0	0	1	0	1		Z(590)
Y(591)	1	3	4	1	1	1	1	1	1	0	0	1	0	1		Z(591)	481.43	399.93	385.39	433.28	538.67	499.94	318.56	691.3	527.32	0	0	337.85	0	302.07			Y(591)	0	1	0	0	1	0	1	1	4	0	0	1	0	1		Z(591)
Y(592)	1	4	1	1	1	1	1	4	1	0	0	1	0	1		Z(592)	481.72	401.59	386.05	433.51	539.28	500.36	318.92	692.19	527.74	0	0	338.08	0	302.3			Y(592)	0	1	0	0	1	0	1	1	1	0	0	4	0	1		Z(592)
Y(593)	1	4	1	1	1	1	1	1	1	0	0	1	0	1		Z(593)	484.06	407.59	386.43	433.76	539.73	500.51	319.58	693.61	527.87	0	0	338.24	0	302.46			Y(593)	0	1	0	0	1	0	1	1	1	0	0	1	0	1		Z(593)
Y(594)	1	1	1	1	1	1	4	1	1	0	0	1	0	1		Z(594)	484.2	408.52	386.66	433.98	541.34	500.99	320.39	693.78	529.43	0	0	338.54	0	302.89			Y(594)	0	1	0	0	1	0	1	1	4	0	0	1	0	1		Z(594)
Y(595)	1	1	1	1	1	1	4	1	1	0	0	1	0	1		Z(595)	484.44	408.95	386.95	434.32	542.01	501.1	320.79	694.18	529.54	0	0	339.14	0	303			Y(595)	0	4	0	0	1	0	1	1	1	0	0	1	0	4		Z(595)
Y(596)	1	1	1	1	1	1	1	1	1	0	0	1	0	1		Z(596)	484.56	409.34	387.1	434.53	542.44	501.99	321.66	694.67	530.07	0	0	339.35	0	303.2			Y(596)	0	1	0	0	1	0	4	1	1	0	0	1	0	1		Z(596)
Y(597)	1	1	1	1	1	1	1	1	1	0	0	1	0	1		Z(597)	484.68	409.47	387.4	434.78	542.58	502.77	321.81	695.85	530.2	0	0	339.7	0	303.34			Y(597)	0	1	0	0	1	0	4	1	1	0	0	1	0	1		Z(597)
Y(598)	1	1	1	1	1	1	1	1	1	0	0	3	0	1		Z(598)	486.26	409.58	389.14	435.28	542.8	503.52	321.87	696.03	530.67	0	0	339.91	0	303.71			Y(598)	0	1	0	0	1	0	1	1	1	0	0	1	0	1		Z(598)
Y(599)	1	1	1	1	1	1	1	1	1	0	0	1	0	1		Z(599)	486.75	409.74	389.28	435.53	542.93	503.76	322.21	696.7	532.91	0	0	340.17	0	304.13			Y(599)	0	1	0	0	4	0	1	1	1	0	0	1	0	1		Z(599)
Y(600)	1	1	1	1	1	1	1	1	1	0	0	1	0	1		Z(600)	487.54	409.87	389.46	435.94	545.2	504.17	322.36	697.58	533.31	0	0	340.32	0	304.3			Y(600)	0	1	0	0	1	0	1	1	1	0	0	1	0	1		Z(600)
Y(601)	1	1	1	1	1	1	1	1	1	0	0	1	0	1		Z(601)	487.67	409.99	389.67	436.28	545.5	504.95	322.49	698.03	533.6	0	0	340.5	0	304.57			Y(601)	0	1	0	0	1	0	1	1	1	0	0	1	0	1		Z(601)
Y(602)	1	1	1	1	1	1	1	1	3	0	0	1	0	4		Z(602)	489.38	410.24	389.89	437.61	545.85	505.57	322.71	699.15	533.71	0	0	340.77	0	305.19			Y(602)	0	1	0	0	1	0	1	4	1	0	0	4	0	1		Z(602)
Y(603)	1	1	1	1	1	1	4	1	1	0	0	1	0	1		Z(603)	489.49	410.35	390	438.01	546.38	505.8	323.79	699.94	534.39	0	0	340.93	0	306.74			Y(603)	0	1	0	0	1	0	1	1	1	0	0	1	0	1		Z(603)
Y(604)	1	1	1	3	1	1	1	1	1	0	0	4	0	1		Z(604)	489.6	410.85	390.11	438.12	546.63	506.65	325.19	700.42	534.85	0	0	341.99	0	306.86			Y(604)	0	1	0	0	1	0	1	1	4	0	0	1	0	1		Z(604)
Y(605)	1	1	3	0	3	1	1	1	4	0	0	4	0	1		Z(605)	490.12	410.99	390.22	0	546.84	506.79	325.33	701.15	535.99	0	0	347.39	0	307.28			Y(605)	0	1	0	0	1	0	1	1	1	0	0	1	0	1		Z(605)
Y(606)	1	1	1	0	1	1	1	1	1	0	0	1	0	1		Z(606)	490.26	411.12	390.73	0	547.13	507.44	325.43	701.58	546.99	0	0	348	0	307.38			Y(606)	0	4	0	0	1	0	4	1	1	0	0	1	0	1		Z(606)
Y(607)	1	1	1	0	4	1	1	1	1	0	0	1	0	1		Z(607)	490.37	411.24	390.88	0	548.19	507.55	325.57	702.26	547.23	0	0	348.5	0	307.47			Y(607)	0	1	0	0	1	0	1	1	1	0	0	1	0	1		Z(607)
Y(608)	1	4	1	0	1	1	1	1	1	0	0	1	0	1		Z(608)	490.81	412.19	391.06	0	569.6	508.23	325.86	702.78	547.77	0	0	348.63	0	307.54			Y(608)	0	1	0	0	3	0	1	1	1	0	0	1	0	1		Z(608)
Y(609)	1	1	4	0	1	1	1	3	1	0	0	1	0	1		Z(609)	492.39	413.33	391.99	0	569.89	508.9	326.19	702.89	548.22	0	0	348.73	0	308.02			Y(609)	0	1	0	0	4	0	1	1	1	0	0	1	0	4		Z(609)
Y(610)	1	1	1	0	1	1	1	4	4	0	0	4	0	1		Z(610)	492.71	414.07	402.44	0	570.32	510.31	326.34	703.79	549.19	0	0	349.79	0	308.39			Y(610)	0	1	0	0	1	0	1	1	1	0	0	1	0	1		Z(610)
Y(611)	1	1	1	0	1	1	4	1	1	0	0	1	0	1		Z(611)	493.42	414.53	402.91	0	570.73	510.84	327.59	741.86	550.49	0	0	350.35	0	308.6			Y(611)	0	1	0	0	1	0	1	1	1	0	0	4	0	1		Z(611)
Y(612)	1	1	1	0	1	1	1	1	1	0	0	1	0	3		Z(612)	494.66	414.66	403.08	0	570.98	511.38	329.33	743.53	551.08	0	0	350.62	0	308.81			Y(612)	0	1	0	0	1	0	4	1	1	0	0	1	0	1		Z(612)
Y(613)	1	1	1	0	1	1	1	1	1	0	0	1	0	1		Z(613)	496.29	414.77	403.41	0	573.08	511.97	329.73	743.83	551.25	0	0	350.71	0	308.93			Y(613)	0	4	0	0	1	0	1	1	4	0	0	1	0	1		Z(613)
Y(614)	1	1	1	0	1	1	1	1	1	0	0	1	0	1		Z(614)	496.56	414.87	403.67	0	573.25	512.08	329.92	743.89	551.31	0	0	351.03	0	309.19			Y(614)	0	1	0	0	1	0	1	4	1	0	0	1	0	1		Z(614)
Y(615)	1	1	1	0	1	1	1	1	1	0	0	1	0	1		Z(615)	496.81	414.97	403.89	0	573.4	512.92	330.42	744.94	551.49	0	0	351.11	0	309.32			Y(615)	0	1	0	0	1	0	1	1	1	0	0	1	0	1		Z(615)
Y(616)	1	1	1	0	1	1	1	1	1	0	0	1	0	1		Z(616)	497.3	415.98	404.25	0	573.51	513.63	330.76	745.86	551.75	0	0	351.18	0	309.68			Y(616)	0	1	0	0	1	0	1	1	1	0	0	1	0	1		Z(616)
Y(617)	1	1	1	0	1	1	1	1	4	0	0	1	0	1		Z(617)	497.53	416.13	404.5	0	573.79	514.31	330.9	746.56	552.39	0	0	351.64	0	309.8			Y(617)	0	1	0	0	1	0	1	1	1	0	0	1	0	1		Z(617)
Y(618)	4	1	1	0	1	1	1	1	1	0	0	1	0	1		Z(618)	498.79	416.24	404.65	0	573.93	515.21	331.05	746.71	552.99	0	0	351.77	0	310.23			Y(618)	0	1	0	0	1	0	1	1	4	0	0	1	0	1		Z(618)
Y(619)	1	1	1	0	1	1	1	1	1	0	0	3	0	4		Z(619)	499.39	416.4	404.96	0	574.19	515.45	331.29	747.38	553.19	0	0	351.88	0	310.99			Y(619)	0	1	0	0	1	0	1	1	1	0	0	1	0	1		Z(619)
Y(620)	1	1	4	0	1	1	1	1	1	0	0	1	0	4		Z(620)	499.54	416.56	406.59	0	574.68	515.99	331.59	748.08	553.65	0	0	352.14	0	316.59			Y(620)	0	1	0	0	1	0	1	1	1	0	0	1	0	1		Z(620)
Y(621)	1	1	1	0	1	1	1	1	1	0	0	1	0	1		Z(621)	499.68	416.69	407.36	0	575.86	517.42	331.8	749.56	553.88	0	0	352.49	0	317.39			Y(621)	0	1	0	0	3	0	1	1	1	0	0	1	0	1		Z(621)
Y(622)	1	1	1	0	1	1	4	1	1	0	0	1	0	1		Z(622)	500.17	416.82	407.47	0	576.23	517.7	332.79	750.13	554.01	0	0	353	0	317.52			Y(622)	0	1	0	0	1	0	4	1	1	0	0	4	0	1		Z(622)
Y(623)	1	3	1	0	1	1	1	1	1	0	0	4	0	1		Z(623)	500.27	416.93	407.61	0	577.84	518.1	334.11	751.68	556.88	0	0	354.39	0	317.66			Y(623)	0	1	0	0	4	0	1	1	1	0	0	1	0	1		Z(623)
Y(624)	1	4	1	0	1	1	1	1	1	0	0	4	0	1		Z(624)	501.84	417.59	407.68	0	577.96	521.95	334.23	752.18	557	0	0	358.79	0	317.76			Y(624)	0	1	0	0	4	0	1	1	1	0	0	1	0	4		Z(624)
Y(625)	1	4	1	0	3	1	1	1	1	0	0	1	0	1		Z(625)	502.05	417.99	407.91	0	578.07	522.57	334.34	752.91	557.24	0	0	360.8	0	317.86			Y(625)	0	1	0	0	1	0	1	1	1	0	0	1	0	1		Z(625)
Y(626)	1	1	1	0	1	1	1	1	1	0	0	1	0	1		Z(626)	502.76	427.47	408.35	0	578.24	523.07	334.48	753.66	557.38	0	0	360.93	0	317.94			Y(626)	0	4	0	0	1	0	1	1	1	0	0	1	0	1		Z(626)
Y(627)	1	1	1	0	1	1	1	1	1	0	0	1	0	1		Z(627)	502.91	427.86	408.48	0	578.43	523.19	334.59	754.21	557.7	0	0	361.18	0	318.2			Y(627)	0	1	0	0	1	0	1	1	1	0	0	1	0	1		Z(627)
Y(628)	3	1	1	0	1	1	1	1	4	0	0	1	0	1		Z(628)	503.02	428.18	408.59	0	578.62	523.77	334.7	755.2	558.79	0	0	361.38	0	318.32			Y(628)	0	1	0	0	1	0	1	4	1	0	0	1	0	1		Z(628)
Y(629)	4	1	1	0	1	1	1	1	1	0	0	1	0	1		Z(629)	503.99	428.28	408.86	0	579.08	524.42	334.84	755.65	559.3	0	0	361.54	0	318.45			Y(629)	0	1	0	0	4	0	1	1	4	0	0	1	0	1		Z(629)
Y(630)	2	1	1	0	1	1	1	1	1	0	0	1	0	1		Z(630)	516	428.48	409.1	0	579.22	524.9	335.1	755.95	559.43	0	0	361.66	0	318.57			Y(630)	0	1	0	0	4	0	1	1	1	0	0	1	0	1		Z(630)
Y(631)	1	1	1	0	1	1	1	1	1	0	0	1	0	1		Z(631)	520	428.67	409.61	0	579.76	525.02	335.53	756.73	560.14	0	0	361.95	0	318.83			Y(631)	0	1	0	0	1	0	1	1	1	0	0	1	0	1		Z(631)
Y(632)	1	1	4	0	1	4	1	1	1	0	0	1	0	1		Z(632)	520.57	428.83	410.39	0	580.09	525.99	335.68	757.8	560.23	0	0	362.12	0	319			Y(632)	0	1	0	0	1	0	4	1	1	0	0	1	0	1		Z(632)
Y(633)	1	1	1	0	1	4	1	1	1	0	0	1	0	1		Z(633)	520.68	430.4	411.09	0	580.7	532.19	335.83	758	560.54	0	0	364.44	0	319.5			Y(633)	0	1	0	0	4	0	4	1	1	0	0	4	0	1		Z(633)
Y(634)	1	4	1	0	1	1	1	1	1	0	0	1	0	4		Z(634)	520.78	431.79	411.17	0	581.14	534.21	336.06	758.68	560.68	0	0	364.64	0	320.59			Y(634)	0	1	0	0	1	0	1	1	1	0	0	1	0	1		Z(634)
Y(635)	1	1	1	0	4	1	4	1	1	0	0	1	0	4		Z(635)	522.37	433.23	411.32	0	581.99	534.4	337.19	759.4	560.86	0	0	365.31	0	320.99			Y(635)	0	1	0	0	1	0	1	1	1	0	0	1	0	1		Z(635)
Y(636)	1	1	1	0	1	1	1	1	1	0	0	1	0	1		Z(636)	522.82	434.2	411.43	0	598.89	534.51	338.3	759.64	563.01	0	0	365.45	0	322.14			Y(636)	0	1	0	0	4	0	1	1	1	0	0	1	0	1		Z(636)
Y(637)	1	1	1	0	1	1	1	4	1	0	0	3	0	1		Z(637)	522.95	434.34	411.56	0	599.09	535.18	338.38	760.59	563.4	0	0	365.56	0	322.28			Y(637)	0	1	0	0	1	0	1	4	1	0	0	1	0	1		Z(637)
Y(638)	1	4	1	0	1	1	1	1	1	0	0	1	0	1		Z(638)	523.1	435.99	412.01	0	599.25	535.3	338.83	761.72	563.69	0	0	366.02	0	322.38			Y(638)	0	1	0	0	1	0	1	1	1	0	0	1	0	1		Z(638)
Y(639)	3	1	1	0	1	1	1	1	1	0	0	1	0	1		Z(639)	523.21	436.77	412.15	0	599.57	535.39	338.93	761.86	564.14	0	0	366.38	0	322.51			Y(639)	0	1	0	0	1	0	1	1	1	0	0	1	0	4		Z(639)
Y(640)	4	1	1	0	1	1	1	1	1	0	0	1	0	1		Z(640)	524.39	437.22	412.34	0	600.02	536.16	339.12	761.98	566.16	0	0	366.53	0	322.72			Y(640)	0	1	0	0	1	0	1	1	4	0	0	1	0	4		Z(640)
Y(641)	1	1	1	0	1	3	1	1	1	0	0	4	0	1		Z(641)	533.4	437.33	414.18	0	600.14	536.37	339.18	762.08	566.29	0	0	367.99	0	322.81			Y(641)	0	1	0	0	1	0	1	1	1	0	0	1	0	1		Z(641)
Y(642)	1	1	1	0	1	4	1	1	3	0	0	1	0	1		Z(642)	533.57	437.44	414.29	0	600.37	536.99	339.33	762.85	566.4	0	0	373.36	0	322.92			Y(642)	0	1	0	0	1	0	1	1	1	0	0	1	0	1		Z(642)
Y(643)	1	1	3	0	1	0	1	1	1	0	0	1	0	1		Z(643)	534	437.82	414.4	0	600.63	0	339.44	763.47	566.54	0	0	374.19	0	323.09			Y(643)	0	4	0	0	4	0	1	1	1	0	0	1	0	1		Z(643)
Y(644)	1	1	1	0	1	0	1	1	1	0	0	1	0	1		Z(644)	534.59	437.95	414.53	0	600.75	0	339.63	763.78	566.67	0	0	374.32	0	323.29			Y(644)	0	1	0	0	1	0	3	1	1	0	0	4	0	1		Z(644)
Y(645)	1	1	1	0	1	0	3	1	1	0	0	1	0	3		Z(645)	536.19	438.96	414.91	0	600.95	0	339.74	764.56	567.04	0	0	374.58	0	323.4			Y(645)	0	1	0	0	1	0	1	1	4	0	0	1	0	1		Z(645)
Y(646)	1	1	1	0	1	0	1	1	1	0	0	1	0	1		Z(646)	536.31	439.08	415.02	0	601.13	0	339.89	764.99	567.24	0	0	377.5	0	323.52			Y(646)	0	1	0	0	1	0	4	1	1	0	0	1	0	1		Z(646)
Y(647)	1	1	1	0	1	0	1	1	1	0	0	1	0	1		Z(647)	536.62	439.32	415.13	0	603.5	0	340.03	766.21	567.36	0	0	377.97	0	323.7			Y(647)	0	1	0	0	1	0	4	4	1	0	0	1	0	1		Z(647)
Y(648)	1	1	1	0	1	0	1	1	4	0	0	1	0	1		Z(648)	536.75	439.59	415.41	0	603.7	0	340.19	766.32	568.59	0	0	378.32	0	324.24			Y(648)	0	1	0	0	1	0	1	1	1	0	0	1	0	1		Z(648)
Y(649)	1	1	1	0	4	0	1	1	4	0	0	1	0	1		Z(649)	536.88	439.76	415.54	0	605.39	0	340.32	766.85	576.19	0	0	378.47	0	324.78			Y(649)	0	1	0	0	1	0	1	1	1	0	0	1	0	1		Z(649)
Y(650)	1	1	1	0	1	0	1	1	1	0	0	1	0	1		Z(650)	537.53	439.95	416.03	0	606.34	0	340.48	767.6	578.18	0	0	378.74	0	324.93			Y(650)	0	1	0	0	1	0	4	1	4	0	0	1	0	1		Z(650)
Y(651)	4	4	1	0	1	0	1	1	1	0	0	1	0	4		Z(651)	538.59	440.79	416.31	0	606.51	0	340.65	768.22	578.58	0	0	380.85	0	325.59			Y(651)	0	1	0	0	4	0	1	1	1	0	0	1	0	1		Z(651)
Y(652)	1	4	1	0	1	0	1	4	1	0	0	1	0	4		Z(652)	539.59	441.19	416.44	0	606.68	0	340.85	768.99	578.69	0	0	381.07	0	329.79			Y(652)	0	1	0	0	1	0	1	1	1	0	0	1	0	3		Z(652)
Y(653)	1	1	1	0	1	0	1	1	1	0	0	1	0	1		Z(653)	539.86	441.86	416.56	0	607.36	0	341	770.64	578.73	0	0	381.34	0	331.51			Y(653)	0	1	0	0	1	0	1	1	1	0	0	1	0	1		Z(653)
Y(654)	1	1	4	0	1	0	1	1	1	0	0	1	0	1		Z(654)	540.17	442.91	417.79	0	607.69	0	341.28	771.56	578.9	0	0	381.61	0	331.63			Y(654)	0	1	0	0	1	0	1	1	1	0	0	1	0	1		Z(654)
Y(655)	1	1	1	0	1	0	1	1	1	0	0	1	0	1		Z(655)	540.25	442.99	431.13	0	609.86	0	341.49	771.99	579.05	0	0	382.2	0	331.76			Y(655)	0	1	0	0	1	0	1	1	1	0	0	1	0	1		Z(655)
Y(656)	1	1	1	0	1	0	1	1	1	0	0	1	0	1		Z(656)	540.68	443.11	431.67	0	610.12	0	341.71	772.45	579.11	0	0	382.35	0	331.9			Y(656)	0	3	0	0	1	0	1	3	1	0	0	4	0	1		Z(656)
Y(657)	4	1	1	0	1	0	4	1	1	0	0	1	0	1		Z(657)	541.79	443.72	432.23	0	610.27	0	342.59	773.31	579.43	0	0	382.63	0	332			Y(657)	0	1	0	0	1	0	1	4	1	0	0	1	0	1		Z(657)
Y(658)	1	1	1	0	1	0	4	1	1	0	0	3	0	1		Z(658)	542.46	443.94	432.43	0	610.79	0	346.79	774.37	579.82	0	0	382.74	0	332.11			Y(658)	0	1	0	0	1	0	1	1	1	0	0	1	0	4		Z(658)
Y(659)	1	1	1	0	1	0	1	1	1	0	0	4	0	1		Z(659)	542.74	444.07	432.73	0	611.17	0	348.84	775.35	580.23	0	0	383.79	0	332.23			Y(659)	0	1	0	0	4	0	1	1	1	0	0	1	0	1		Z(659)
Y(660)	1	1	1	0	1	0	1	1	1	0	0	1	0	1		Z(660)	543.04	444.18	432.85	0	611.29	0	349.39	776.95	580.64	0	0	388.76	0	332.35			Y(660)	0	1	0	0	1	0	4	1	1	0	0	1	0	1		Z(660)
Y(661)	1	1	1	0	4	0	1	1	1	0	0	1	0	1		Z(661)	543.41	445.15	432.96	0	612.79	0	349.49	777.25	580.9	0	0	388.89	0	332.46			Y(661)	0	4	0	0	1	0	1	1	1	0	0	1	0	1		Z(661)
Y(662)	1	4	1	0	1	0	1	1	3	0	0	1	0	1		Z(662)	544.82	446.39	434.74	0	613.84	0	349.81	777.98	581.01	0	0	388.98	0	332.61			Y(662)	0	4	0	0	1	0	1	1	1	0	0	1	0	1		Z(662)
Y(663)	1	1	1	0	1	0	1	4	0	0	0	1	0	1		Z(663)	545.24	447.37	434.91	0	613.96	0	349.9	778.99	0	0	0	389.56	0	332.86			Y(663)	0	1	0	0	1	0	1	1	1	0	0	1	0	1		Z(663)
Y(664)	1	1	1	0	1	0	1	1	0	0	0	1	0	1		Z(664)	545.36	448.08	435.24	0	614.21	0	350.07	780.81	0	0	0	389.69	0	332.97			Y(664)	0	1	0	0	1	0	1	1	1	0	0	1	0	1		Z(664)
Y(665)	1	1	1	0	4	0	1	1	0	0	0	1	0	1		Z(665)	545.53	448.51	435.37	0	615.19	0	350.35	781	0	0	0	389.81	0	333.17			Y(665)	0	1	0	0	1	0	1	1	4	0	0	3	0	1		Z(665)
Y(666)	1	1	1	0	1	0	3	1	0	0	0	1	0	1		Z(666)	545.66	448.61	435.65	0	616.73	0	350.46	781.12	0	0	0	389.9	0	333.36			Y(666)	0	1	0	0	1	0	1	3	1	0	0	1	0	1		Z(666)
Y(667)	1	4	1	0	1	0	4	1	0	0	0	1	0	1		Z(667)	546.32	450.19	435.77	0	617.31	0	350.99	782.03	0	0	0	390.63	0	333.59			Y(667)	0	1	0	0	4	0	1	4	1	0	0	1	0	1		Z(667)
Y(668)	4	1	1	0	1	0	4	1	0	0	0	1	0	1		Z(668)	547.19	450.95	436.16	0	617.62	0	358.19	782.6	0	0	0	390.92	0	333.71			Y(668)	0	1	0	0	1	0	1	1	1	0	0	1	0	1		Z(668)
Y(669)	1	1	1	0	1	0	1	1	0	0	0	1	0	3		Z(669)	547.95	451.63	437.71	0	618.14	0	359.39	782.74	0	0	0	393.29	0	333.82			Y(669)	0	1	0	0	1	0	1	1	4	0	0	1	0	1		Z(669)
Y(670)	1	1	1	0	1	0	1	1	0	0	0	1	0	0		Z(670)	548.09	451.85	437.87	0	618.61	0	359.6	783.38	0	0	0	393.4	0	0			Y(670)	0	3	0	0	1	0	3	1	1	0	0	3	0	4		Z(670)
Y(671)	1	1	1	0	1	0	1	1	0	0	0	3	0	0		Z(671)	548.21	451.95	438	0	619.73	0	359.76	783.84	0	0	0	393.51	0	0			Y(671)	0	1	0	0	1	0	1	1	1	0	0	4	0	1		Z(671)
Y(672)	1	1	1	0	1	0	1	1	0	0	0	1	0	0		Z(672)	548.31	452.11	438.23	0	619.98	0	359.88	784.55	0	0	0	393.62	0	0			Y(672)	0	4	0	0	1	0	1	1	1	0	0	4	0	1		Z(672)
Y(673)	1	1	1	0	1	0	1	1	0	0	0	1	0	0		Z(673)	548.7	452.2	438.48	0	620.86	0	360.07	784.78	0	0	0	394.03	0	0			Y(673)	0	1	0	0	1	0	1	1	1	0	0	4	0	1		Z(673)
Y(674)	1	1	1	0	1	0	1	1	0	0	0	1	0	0		Z(674)	549.23	452.3	438.91	0	620.97	0	360.27	786.16	0	0	0	394.2	0	0			Y(674)	0	1	0	0	1	0	4	1	4	0	0	1	0	1		Z(674)
Y(675)	1	4	1	0	4	0	1	1	0	0	0	1	0	0		Z(675)	550.11	453.39	439.18	0	621.99	0	360.47	786.76	0	0	0	394.55	0	0			Y(675)	0	1	0	0	1	0	1	1	1	0	0	1	0	1		Z(675)
Y(676)	1	1	1	0	1	0	4	1	0	0	0	4	0	0		Z(676)	550.23	455.54	439.37	0	622.91	0	361.99	787.5	0	0	0	395.39	0	0			Y(676)	0	1	0	0	1	0	1	1	1	0	0	4	0	1		Z(676)
Y(677)	1	1	1	0	1	0	1	1	0	0	0	1	0	0		Z(677)	550.43	455.95	439.57	0	623.12	0	363.37	787.93	0	0	0	401.16	0	0			Y(677)	0	1	0	0	3	0	1	1	1	0	0	1	0	1		Z(677)
Y(678)	1	1	4	0	1	0	1	3	0	0	0	1	0	0		Z(678)	551.66	456.47	440.59	0	623.26	0	363.48	788.14	0	0	0	401.3	0	0			Y(678)	0	4	0	0	4	0	1	1	1	0	0	1	0	1		Z(678)
Y(679)	1	1	1	0	1	0	1	4	0	0	0	4	0	0		Z(679)	551.85	456.94	441.7	0	623.65	0	363.63	788.79	0	0	0	402.39	0	0			Y(679)	0	4	0	0	1	0	1	1	1	0	0	1	0	1		Z(679)
Y(680)	1	1	1	0	1	0	1	0	0	0	0	1	0	0		Z(680)	551.99	457.07	441.8	0	623.76	0	363.75	0	0	0	0	403.44	0	0			Y(680)	0	1	0	0	1	0	1	1	1	0	0	1	0	1		Z(680)
Y(681)	1	1	1	0	1	0	1	0	0	0	0	1	0	0		Z(681)	552.1	458.5	441.93	0	624.02	0	364.02	0	0	0	0	403.53	0	0			Y(681)	0	1	0	0	1	0	4	1	1	0	0	1	0	1		Z(681)
Y(682)	4	1	1	0	4	0	1	0	0	0	0	1	0	0		Z(682)	553.19	458.73	442.25	0	625.39	0	364.29	0	0	0	0	403.64	0	0			Y(682)	0	1	0	0	1	0	1	1	1	0	0	1	0	1		Z(682)
Y(683)	1	1	1	0	1	0	1	0	0	0	0	1	0	0		Z(683)	553.54	458.96	442.38	0	626.07	0	364.61	0	0	0	0	403.71	0	0			Y(683)	0	1	0	0	1	0	1	1	1	0	0	4	0	1		Z(683)
Y(684)	1	1	1	0	1	0	1	0	0	0	0	1	0	0		Z(684)	553.71	459.07	442.69	0	626.25	0	364.74	0	0	0	0	404.12	0	0			Y(684)	0	1	0	0	1	0	1	1	4	0	0	1	0	4		Z(684)
Y(685)	1	1	1	0	1	0	4	0	0	0	0	1	0	0		Z(685)	554.02	459.49	442.95	0	626.39	0	365.79	0	0	0	0	404.28	0	0			Y(685)	0	1	0	0	1	0	1	3	1	0	0	1	0	1		Z(685)
Y(686)	1	1	4	0	1	0	4	0	0	0	0	1	0	0		Z(686)	554.29	459.64	444.39	0	626.53	0	366.39	0	0	0	0	404.59	0	0			Y(686)	0	1	0	0	1	0	1	4	1	0	0	1	0	1		Z(686)
Y(687)	1	1	1	0	1	0	1	0	0	0	0	3	0	0		Z(687)	554.4	459.86	445.08	0	626.65	0	367.46	0	0	0	0	404.7	0	0			Y(687)	0	1	0	0	1	0	1	1	1	0	0	1	0	1		Z(687)
Y(688)	1	1	1	0	1	0	1	0	0	0	0	0	0	0		Z(688)	554.52	460.79	445.22	0	626.91	0	367.57	0	0	0	0	0	0	0			Y(688)	0	1	0	0	1	0	1	1	1	0	0	1	0	1		Z(688)
Y(689)	1	1	1	0	1	0	1	0	0	0	0	0	0	0		Z(689)	554.74	462.29	445.43	0	627.1	0	367.82	0	0	0	0	0	0	0			Y(689)	0	3	0	0	4	0	4	1	1	0	0	1	0	1		Z(689)
Y(690)	1	3	1	0	1	0	1	0	0	0	0	0	0	0		Z(690)	554.98	462.4	445.51	0	627.25	0	368.01	0	0	0	0	0	0	0			Y(690)	0	1	0	0	1	0	1	1	1	0	0	1	0	1		Z(690)
Y(691)	1	1	1	0	1	0	1	0	0	0	0	0	0	0		Z(691)	555.52	462.56	445.69	0	627.71	0	368.13	0	0	0	0	0	0	0			Y(691)	0	1	0	0	1	0	1	1	4	0	0	4	0	1		Z(691)
Y(692)	1	4	1	0	1	0	1	0	0	0	0	0	0	0		Z(692)	555.65	463.79	445.95	0	627.97	0	368.28	0	0	0	0	0	0	0			Y(692)	0	1	0	0	1	0	1	1	1	0	0	1	0	1		Z(692)
Y(693)	1	1	1	0	1	0	1	0	0	0	0	0	0	0		Z(693)	555.81	470.24	446.01	0	628.21	0	368.42	0	0	0	0	0	0	0			Y(693)	0	4	0	0	1	0	1	1	1	0	0	1	0	1		Z(693)
Y(694)	1	1	3	0	1	0	3	0	0	0	0	0	0	0		Z(694)	555.92	470.48	446.12	0	628.34	0	368.53	0	0	0	0	0	0	0			Y(694)	0	1	0	0	1	0	1	1	1	0	0	1	0	1		Z(694)
Y(695)	1	1	1	0	1	0	1	0	0	0	0	0	0	0		Z(695)	556.06	470.61	446.45	0	629.02	0	368.71	0	0	0	0	0	0	0			Y(695)	0	1	0	0	1	0	1	1	1	0	0	1	0	3		Z(695)
Y(696)	4	1	1	0	1	0	4	0	0	0	0	0	0	0		Z(696)	557.39	470.78	446.6	0	629.88	0	369.59	0	0	0	0	0	0	0			Y(696)	0	1	0	0	1	0	1	1	1	0	0	1	0	0		Z(696)
Y(697)	1	1	4	0	4	0	4	0	0	0	0	0	0	0		Z(697)	557.99	472.71	447.79	0	630.99	0	376.79	0	0	0	0	0	0	0			Y(697)	0	1	0	0	3	0	4	1	1	0	0	1	0	0		Z(697)
Y(698)	1	1	1	0	1	0	4	0	0	0	0	0	0	0		Z(698)	558.37	472.86	456.35	0	632.14	0	379.19	0	0	0	0	0	0	0			Y(698)	0	1	0	0	4	0	1	1	1	0	0	1	0	0		Z(698)
Y(699)	1	1	1	0	1	0	1	0	0	0	0	0	0	0		Z(699)	558.47	473.03	456.56	0	632.27	0	380.62	0	0	0	0	0	0	0			Y(699)	0	1	0	0	1	0	1	1	4	0	0	4	0	0		Z(699)
Y(700)	1	4	1	0	1	0	1	0	0	0	0	0	0	0		Z(700)	558.6	473.59	457.06	0	632.54	0	380.66	0	0	0	0	0	0	0			Y(700)	0	1	0	0	1	0	1	3	1	0	0	1	0	0		Z(700)
Y(701)	1	1	1	0	1	0	1	0	0	0	0	0	0	0		Z(701)	558.71	474.77	457.38	0	633.1	0	380.78	0	0	0	0	0	0	0			Y(701)	0	1	0	0	1	0	1	4	1	0	0	1	0	0		Z(701)
Y(702)	1	1	1	0	1	0	1	0	0	0	0	0	0	0		Z(702)	558.85	475.35	458.12	0	633.61	0	380.9	0	0	0	0	0	0	0			Y(702)	0	1	0	0	1	0	1	4	1	0	0	1	0	0		Z(702)
Y(703)	1	1	1	0	1	0	1	0	0	0	0	0	0	0		Z(703)	558.92	475.43	460.72	0	634.42	0	381.1	0	0	0	0	0	0	0			Y(703)	0	1	0	0	1	0	1	1	1	0	0	1	0	0		Z(703)
Y(704)	4	1	1	0	1	0	1	0	0	0	0	0	0	0		Z(704)	559.99	475.55	460.9	0	635.12	0	381.21	0	0	0	0	0	0	0			Y(704)	0	1	0	0	1	0	1	1	1	0	0	1	0	0		Z(704)
Y(705)	1	1	3	0	1	0	1	0	0	0	0	0	0	0		Z(705)	560.45	478.5	461.01	0	635.65	0	381.29	0	0	0	0	0	0	0			Y(705)	0	1	0	0	1	0	4	1	1	0	0	1	0	0		Z(705)
Y(706)	1	1	1	0	1	0	1	0	0	0	0	0	0	0		Z(706)	561.14	479.02	461.12	0	637.08	0	381.56	0	0	0	0	0	0	0			Y(706)	0	1	0	0	4	0	1	1	4	0	0	1	0	0		Z(706)
Y(707)	1	1	3	0	1	0	1	0	0	0	0	0	0	0		Z(707)	563.01	479.14	461.23	0	637.22	0	381.75	0	0	0	0	0	0	0			Y(707)	0	1	0	0	1	0	1	1	1	0	0	1	0	0		Z(707)
Y(708)	1	1	1	0	1	0	4	0	0	0	0	0	0	0		Z(708)	563.16	480.33	461.45	0	638.9	0	382.79	0	0	0	0	0	0	0			Y(708)	0	1	0	0	1	0	1	1	1	0	0	1	0	0		Z(708)
Y(709)	1	1	1	0	1	0	1	0	0	0	0	0	0	0		Z(709)	563.58	480.53	461.73	0	639.24	0	383.92	0	0	0	0	0	0	0			Y(709)	0	1	0	0	1	0	1	1	1	0	0	1	0	0		Z(709)
Y(710)	1	1	1	0	4	0	1	0	0	0	0	0	0	0		Z(710)	563.7	480.65	461.87	0	640.19	0	384.14	0	0	0	0	0	0	0			Y(710)	0	1	0	0	1	0	1	4	1	0	0	4	0	0		Z(710)
Y(711)	4	1	1	0	1	0	1	0	0	0	0	0	0	0		Z(711)	564.99	480.8	462.08	0	640.96	0	384.34	0	0	0	0	0	0	0			Y(711)	0	1	0	0	1	0	1	1	1	0	0	1	0	0		Z(711)
Y(712)	1	1	1	0	1	0	1	0	0	0	0	0	0	0		Z(712)	565.24	480.92	462.21	0	641.09	0	384.49	0	0	0	0	0	0	0			Y(712)	0	1	0	0	1	0	1	1	1	0	0	1	0	0		Z(712)
Y(713)	1	1	4	0	1	0	1	0	0	0	0	0	0	0		Z(713)	565.4	481.13	463.39	0	641.28	0	384.74	0	0	0	0	0	0	0			Y(713)	0	1	0	0	1	0	1	1	1	0	0	1	0	0		Z(713)
Y(714)	1	1	4	0	1	0	1	0	0	0	0	0	0	0		Z(714)	565.57	481.29	473.99	0	641.46	0	384.87	0	0	0	0	0	0	0			Y(714)	0	1	0	0	1	0	1	1	1	0	0	1	0	0		Z(714)
Y(715)	1	1	1	0	1	0	1	0	0	0	0	0	0	0		Z(715)	565.66	481.41	494.48	0	641.83	0	385.1	0	0	0	0	0	0	0			Y(715)	0	1	0	0	4	0	1	1	1	0	0	1	0	0		Z(715)
Y(716)	1	1	1	0	1	0	1	0	0	0	0	0	0	0		Z(716)	566.13	481.6	494.79	0	642.21	0	385.43	0	0	0	0	0	0	0			Y(716)	0	1	0	0	1	0	1	1	4	0	0	1	0	0		Z(716)
Y(717)	1	4	1	0	1	0	4	0	0	0	0	0	0	0		Z(717)	566.26	482.79	495.19	0	642.57	0	386.39	0	0	0	0	0	0	0			Y(717)	0	1	0	0	4	0	1	1	1	0	0	1	0	0		Z(717)
Y(718)	1	1	1	0	1	0	1	0	0	0	0	0	0	0		Z(718)	566.39	484.08	495.37	0	643.29	0	387.6	0	0	0	0	0	0	0			Y(718)	0	1	0	0	1	0	4	1	1	0	0	1	0	0		Z(718)
Y(719)	1	1	1	0	3	0	1	0	0	0	0	0	0	0		Z(719)	566.5	484.51	495.86	0	643.5	0	388.02	0	0	0	0	0	0	0			Y(719)	0	4	0	0	1	0	1	1	1	0	0	1	0	0		Z(719)
Y(720)	1	1	1	0	1	0	1	0	0	0	0	0	0	0		Z(720)	566.62	484.88	495.96	0	644.85	0	388.22	0	0	0	0	0	0	0			Y(720)	0	1	0	0	1	0	1	1	4	0	0	1	0	0		Z(720)
Y(721)	1	1	1	0	1	0	1	0	0	0	0	0	0	0		Z(721)	568.02	485	498.21	0	644.96	0	388.5	0	0	0	0	0	0	0			Y(721)	0	1	0	0	1	0	1	1	1	0	0	4	0	0		Z(721)
Y(722)	1	1	1	0	4	0	1	0	0	0	0	0	0	0		Z(722)	568.46	485.17	498.42	0	645.99	0	388.75	0	0	0	0	0	0	0			Y(722)	0	1	0	0	1	0	1	1	1	0	0	1	0	0		Z(722)
Y(723)	1	1	1	0	4	0	4	0	0	0	0	0	0	0		Z(723)	568.58	485.33	498.85	0	674.79	0	389.79	0	0	0	0	0	0	0			Y(723)	0	1	0	0	1	0	1	1	1	0	0	1	0	0		Z(723)
Y(724)	1	1	1	0	1	0	1	0	0	0	0	0	0	0		Z(724)	568.69	486.15	499.25	0	676.18	0	390.67	0	0	0	0	0	0	0			Y(724)	0	1	0	0	1	0	1	1	1	0	0	1	0	0		Z(724)
Y(725)	1	4	4	0	1	0	1	0	0	0	0	0	0	0		Z(725)	569.28	486.99	500.39	0	676.73	0	390.78	0	0	0	0	0	0	0			Y(725)	0	1	0	0	1	0	1	1	1	0	0	1	0	0		Z(725)
Y(726)	1	1	1	0	1	0	1	0	0	0	0	0	0	0		Z(726)	569.39	487.58	501.08	0	676.86	0	391.02	0	0	0	0	0	0	0			Y(726)	0	1	0	0	4	0	1	1	1	0	0	1	0	0		Z(726)
Y(727)	1	1	1	0	1	0	1	0	0	0	0	0	0	0		Z(727)	569.55	487.8	501.22	0	677.03	0	391.24	0	0	0	0	0	0	0			Y(727)	0	1	0	0	1	0	1	1	1	0	0	1	0	0		Z(727)
Y(728)	1	1	1	0	1	0	1	0	0	0	0	0	0	0		Z(728)	569.77	488.08	501.26	0	677.34	0	391.36	0	0	0	0	0	0	0			Y(728)	0	4	0	0	1	0	1	4	1	0	0	1	0	0		Z(728)
Y(729)	1	1	1	0	1	0	1	0	0	0	0	0	0	0		Z(729)	571.97	488.21	501.63	0	679.42	0	391.94	0	0	0	0	0	0	0			Y(729)	0	1	0	0	1	0	4	1	1	0	0	3	0	0		Z(729)
Y(730)	1	1	1	0	1	0	4	0	0	0	0	0	0	0		Z(730)	572.43	489.7	501.76	0	679.56	0	392.99	0	0	0	0	0	0	0			Y(730)	0	1	0	0	1	0	1	1	1	0	0	4	0	0		Z(730)
Y(731)	1	1	1	0	1	0	1	0	0	0	0	0	0	0		Z(731)	572.66	489.81	501.88	0	679.8	0	394.08	0	0	0	0	0	0	0			Y(731)	0	1	0	0	4	0	1	1	1	0	0	4	0	0		Z(731)
Y(732)	1	1	1	0	1	0	1	0	0	0	0	0	0	0		Z(732)	572.82	489.99	502.28	0	680.28	0	394.19	0	0	0	0	0	0	0			Y(732)	0	1	0	0	1	0	1	1	3	0	0	1	0	0		Z(732)
Y(733)	1	1	1	0	1	0	1	0	0	0	0	0	0	0		Z(733)	572.95	490.18	502.51	0	680.39	0	394.49	0	0	0	0	0	0	0			Y(733)	0	1	0	0	4	0	1	1	0	0	0	1	0	0		Z(733)
Y(734)	1	1	1	0	1	0	1	0	0	0	0	0	0	0		Z(734)	573.08	492.27	504.53	0	680.56	0	394.57	0	0	0	0	0	0	0			Y(734)	0	1	0	0	1	0	1	1	0	0	0	1	0	0		Z(734)
Y(735)	3	1	1	0	1	0	1	0	0	0	0	0	0	0		Z(735)	573.29	492.4	504.99	0	680.67	0	394.91	0	0	0	0	0	0	0			Y(735)	0	1	0	0	1	0	1	1	0	0	0	1	0	0		Z(735)
Y(736)	4	1	1	0	1	0	1	0	0	0	0	0	0	0		Z(736)	574.39	492.57	505.47	0	680.83	0	395.11	0	0	0	0	0	0	0			Y(736)	0	1	0	0	1	0	1	3	0	0	0	4	0	0		Z(736)
Y(737)	2	1	1	0	1	0	1	0	0	0	0	0	0	0		Z(737)	583.33	493.17	505.66	0	680.95	0	395.27	0	0	0	0	0	0	0			Y(737)	0	1	0	0	1	0	1	4	0	0	0	1	0	0		Z(737)
Y(738)	2	3	4	0	1	0	1	0	0	0	0	0	0	0		Z(738)	584.06	493.28	506.59	0	681.12	0	395.39	0	0	0	0	0	0	0			Y(738)	0	1	0	0	4	0	1	0	0	0	0	1	0	0		Z(738)
Y(739)	1	0	1	0	1	0	1	0	0	0	0	0	0	0		Z(739)	589.68	0	507.41	0	681.23	0	395.53	0	0	0	0	0	0	0			Y(739)	0	1	0	0	1	0	1	0	0	0	0	1	0	0		Z(739)
Y(740)	1	0	1	0	1	0	1	0	0	0	0	0	0	0		Z(740)	590.36	0	507.47	0	681.36	0	395.7	0	0	0	0	0	0	0			Y(740)	0	1	0	0	1	0	1	0	0	0	0	1	0	0		Z(740)
Y(741)	1	0	1	0	1	0	1	0	0	0	0	0	0	0		Z(741)	590.41	0	507.64	0	681.55	0	396.09	0	0	0	0	0	0	0			Y(741)	0	1	0	0	1	0	1	0	0	0	0	1	0	0		Z(741)
Y(742)	1	0	1	0	1	0	1	0	0	0	0	0	0	0		Z(742)	592.26	0	507.91	0	681.66	0	396.23	0	0	0	0	0	0	0			Y(742)	0	4	0	0	4	0	1	0	0	0	0	1	0	0		Z(742)
Y(743)	1	0	1	0	1	0	4	0	0	0	0	0	0	0		Z(743)	592.74	0	507.97	0	681.86	0	397.39	0	0	0	0	0	0	0			Y(743)	0	4	0	0	1	0	4	0	0	0	0	1	0	0		Z(743)
Y(744)	1	0	1	0	1	0	4	0	0	0	0	0	0	0		Z(744)	592.92	0	508.12	0	683.74	0	397.99	0	0	0	0	0	0	0			Y(744)	0	1	0	0	1	0	1	0	0	0	0	1	0	0		Z(744)
Y(745)	1	0	1	0	3	0	1	0	0	0	0	0	0	0		Z(745)	593.05	0	508.34	0	683.85	0	398.81	0	0	0	0	0	0	0			Y(745)	0	1	0	0	1	0	1	0	0	0	0	1	0	0		Z(745)
Y(746)	1	0	1	0	1	0	1	0	0	0	0	0	0	0		Z(746)	595.67	0	508.51	0	684.01	0	399	0	0	0	0	0	0	0			Y(746)	0	1	0	0	1	0	1	0	0	0	0	1	0	0		Z(746)
Y(747)	1	0	1	0	1	0	1	0	0	0	0	0	0	0		Z(747)	595.91	0	508.99	0	684.32	0	399.15	0	0	0	0	0	0	0			Y(747)	0	1	0	0	1	0	1	0	0	0	0	1	0	0		Z(747)
Y(748)	1	0	4	0	1	0	1	0	0	0	0	0	0	0		Z(748)	596.26	0	510.59	0	684.52	0	399.48	0	0	0	0	0	0	0			Y(748)	0	1	0	0	4	0	1	0	0	0	0	4	0	0		Z(748)
Y(749)	1	0	1	0	1	0	1	0	0	0	0	0	0	0		Z(749)	598.45	0	511.61	0	685.16	0	399.61	0	0	0	0	0	0	0			Y(749)	0	1	0	0	1	0	1	0	0	0	0	1	0	0		Z(749)
Y(750)	1	0	1	0	4	0	1	0	0	0	0	0	0	0		Z(750)	598.72	0	511.72	0	685.79	0	399.88	0	0	0	0	0	0	0			Y(750)	0	1	0	0	1	0	1	0	0	0	0	1	0	0		Z(750)
Y(751)	1	0	1	0	1	0	4	0	0	0	0	0	0	0		Z(751)	598.91	0	511.8	0	717.79	0	400.99	0	0	0	0	0	0	0			Y(751)	0	1	0	0	1	0	1	0	0	0	0	1	0	0		Z(751)
Y(752)	3	0	1	0	1	0	1	0	0	0	0	0	0	0		Z(752)	599.02	0	512.04	0	718.06	0	401.96	0	0	0	0	0	0	0			Y(752)	0	1	0	0	1	0	4	0	0	0	0	1	0	0		Z(752)
Y(753)	4	0	1	0	1	0	1	0	0	0	0	0	0	0		Z(753)	599.99	0	512.16	0	718.23	0	402.07	0	0	0	0	0	0	0			Y(753)	0	1	0	0	1	0	1	0	0	0	0	1	0	0		Z(753)
Y(754)	1	0	1	0	1	0	1	0	0	0	0	0	0	0		Z(754)	611.34	0	512.25	0	718.36	0	402.21	0	0	0	0	0	0	0			Y(754)	0	1	0	0	1	0	1	0	0	0	0	4	0	0		Z(754)
Y(755)	1	0	1	0	1	0	1	0	0	0	0	0	0	0		Z(755)	611.45	0	512.77	0	718.57	0	402.95	0	0	0	0	0	0	0			Y(755)	0	1	0	0	1	0	1	0	0	0	0	1	0	0		Z(755)
Y(756)	1	0	1	0	1	0	1	0	0	0	0	0	0	0		Z(756)	611.59	0	512.89	0	718.7	0	403.05	0	0	0	0	0	0	0			Y(756)	0	1	0	0	4	0	1	0	0	0	0	1	0	0		Z(756)
Y(757)	1	0	4	0	1	0	1	0	0	0	0	0	0	0		Z(757)	611.86	0	513.79	0	718.93	0	403.2	0	0	0	0	0	0	0			Y(757)	0	1	0	0	1	0	4	0	0	0	0	1	0	0		Z(757)
Y(758)	1	0	1	0	1	0	1	0	0	0	0	0	0	0		Z(758)	612.15	0	514.74	0	720.45	0	403.35	0	0	0	0	0	0	0			Y(758)	0	4	0	0	1	0	1	0	0	0	0	1	0	0		Z(758)
Y(759)	1	0	1	0	1	0	1	0	0	0	0	0	0	0		Z(759)	614.18	0	514.96	0	720.9	0	403.48	0	0	0	0	0	0	0			Y(759)	0	1	0	0	1	0	1	0	0	0	0	1	0	0		Z(759)
Y(760)	1	0	1	0	1	0	1	0	0	0	0	0	0	0		Z(760)	614.27	0	515.09	0	721.03	0	403.67	0	0	0	0	0	0	0			Y(760)	0	1	0	0	1	0	1	0	0	0	0	1	0	0		Z(760)
Y(761)	1	0	1	0	1	0	1	0	0	0	0	0	0	0		Z(761)	614.5	0	515.42	0	721.16	0	403.82	0	0	0	0	0	0	0			Y(761)	0	1	0	0	1	0	1	0	0	0	0	1	0	0		Z(761)
Y(762)	1	0	1	0	1	0	4	0	0	0	0	0	0	0		Z(762)	615.25	0	515.97	0	721.43	0	404.59	0	0	0	0	0	0	0			Y(762)	0	1	0	0	1	0	1	0	0	0	0	1	0	0		Z(762)
Y(763)	1	0	1	0	1	0	1	0	0	0	0	0	0	0		Z(763)	615.48	0	517.94	0	721.68	0	405.65	0	0	0	0	0	0	0			Y(763)	0	1	0	0	1	0	1	0	0	0	0	1	0	0		Z(763)
Y(764)	1	0	1	0	1	0	1	0	0	0	0	0	0	0		Z(764)	617.13	0	518.04	0	721.79	0	405.73	0	0	0	0	0	0	0			Y(764)	0	1	0	0	4	0	1	0	0	0	0	1	0	0		Z(764)
Y(765)	1	0	1	0	3	0	1	0	0	0	0	0	0	0		Z(765)	617.32	0	518.18	0	721.9	0	405.84	0	0	0	0	0	0	0			Y(765)	0	1	0	0	1	0	1	0	0	0	0	1	0	0		Z(765)
Y(766)	1	0	1	0	1	0	1	0	0	0	0	0	0	0		Z(766)	617.76	0	518.29	0	722.06	0	406.09	0	0	0	0	0	0	0			Y(766)	0	3	0	0	1	0	1	0	0	0	0	1	0	0		Z(766)
Y(767)	1	0	1	0	4	0	1	0	0	0	0	0	0	0		Z(767)	617.89	0	518.41	0	722.79	0	406.29	0	0	0	0	0	0	0			Y(767)	0	1	0	0	4	0	4	0	0	0	0	4	0	0		Z(767)
Y(768)	1	0	1	0	1	0	1	0	0	0	0	0	0	0		Z(768)	618.01	0	519.36	0	748.74	0	406.51	0	0	0	0	0	0	0			Y(768)	0	1	0	0	1	0	1	0	0	0	0	1	0	0		Z(768)
Y(769)	1	0	1	0	1	0	1	0	0	0	0	0	0	0		Z(769)	618.35	0	519.64	0	749.09	0	406.8	0	0	0	0	0	0	0			Y(769)	0	1	0	0	1	0	1	0	0	0	0	1	0	0		Z(769)
Y(770)	1	0	4	0	1	0	1	0	0	0	0	0	0	0		Z(770)	618.47	0	520.79	0	749.73	0	407.17	0	0	0	0	0	0	0			Y(770)	0	1	0	0	1	0	1	0	0	0	0	1	0	0		Z(770)
Y(771)	1	0	1	0	1	0	1	0	0	0	0	0	0	0		Z(771)	620.45	0	521.39	0	751.49	0	407.31	0	0	0	0	0	0	0			Y(771)	0	1	0	0	1	0	1	0	0	0	0	1	0	0		Z(771)
Y(772)	1	0	1	0	1	0	1	0	0	0	0	0	0	0		Z(772)	620.77	0	521.5	0	751.87	0	407.46	0	0	0	0	0	0	0			Y(772)	0	1	0	0	4	0	1	0	0	0	0	1	0	0		Z(772)
Y(773)	1	0	1	0	1	0	1	0	0	0	0	0	0	0		Z(773)	621.12	0	521.61	0	752.66	0	407.68	0	0	0	0	0	0	0			Y(773)	0	1	0	0	1	0	1	0	0	0	0	1	0	0		Z(773)
Y(774)	1	0	1	0	4	0	1	0	0	0	0	0	0	0		Z(774)	621.26	0	521.71	0	753.99	0	407.84	0	0	0	0	0	0	0			Y(774)	0	1	0	0	1	0	1	0	0	0	0	1	0	0		Z(774)
Y(775)	1	0	1	0	1	0	1	0	0	0	0	0	0	0		Z(775)	623.24	0	521.82	0	754.9	0	408.27	0	0	0	0	0	0	0			Y(775)	0	1	0	0	1	0	1	0	0	0	0	1	0	0		Z(775)
Y(776)	1	0	1	0	1	0	4	0	0	0	0	0	0	0		Z(776)	623.8	0	521.93	0	755.15	0	409.99	0	0	0	0	0	0	0			Y(776)	0	1	0	0	4	0	3	0	0	0	0	1	0	0		Z(776)
Y(777)	1	0	1	0	1	0	1	0	0	0	0	0	0	0		Z(777)	623.92	0	522.04	0	755.26	0	411.34	0	0	0	0	0	0	0			Y(777)	0	1	0	0	1	0	1	0	0	0	0	1	0	0		Z(777)
Y(778)	1	0	1	0	1	0	1	0	0	0	0	0	0	0		Z(778)	624.04	0	522.31	0	755.85	0	411.66	0	0	0	0	0	0	0			Y(778)	0	1	0	0	1	0	1	0	0	0	0	3	0	0		Z(778)
Y(779)	1	0	1	0	1	0	1	0	0	0	0	0	0	0		Z(779)	624.16	0	524.21	0	756.27	0	412.04	0	0	0	0	0	0	0			Y(779)	0	1	0	0	1	0	1	0	0	0	0	4	0	0		Z(779)
Y(780)	1	0	1	0	4	0	1	0	0	0	0	0	0	0		Z(780)	625.76	0	524.36	0	757.59	0	412.16	0	0	0	0	0	0	0			Y(780)	0	1	0	0	1	0	1	0	0	0	0	4	0	0		Z(780)
Y(781)	1	0	1	0	1	0	1	0	0	0	0	0	0	0		Z(781)	625.91	0	524.61	0	758.32	0	412.64	0	0	0	0	0	0	0			Y(781)	0	1	0	0	1	0	3	0	0	0	0	1	0	0		Z(781)
Y(782)	1	0	1	0	1	0	1	0	0	0	0	0	0	0		Z(782)	626.15	0	524.87	0	758.7	0	412.71	0	0	0	0	0	0	0			Y(782)	0	4	0	0	1	0	1	0	0	0	0	1	0	0		Z(782)
Y(783)	3	0	1	0	1	0	1	0	0	0	0	0	0	0		Z(783)	626.26	0	525.33	0	758.83	0	412.82	0	0	0	0	0	0	0			Y(783)	0	4	0	0	1	0	4	0	0	0	0	1	0	0		Z(783)
Y(784)	4	0	1	0	1	0	1	0	0	0	0	0	0	0		Z(784)	628.19	0	525.61	0	759.11	0	412.98	0	0	0	0	0	0	0			Y(784)	0	1	0	0	1	0	4	0	0	0	0	1	0	0		Z(784)
Y(785)	1	0	1	0	4	0	1	0	0	0	0	0	0	0		Z(785)	644.98	0	527.17	0	760.39	0	413.27	0	0	0	0	0	0	0			Y(785)	0	1	0	0	1	0	2	0	0	0	0	1	0	0		Z(785)
Y(786)	1	0	1	0	1	0	1	0	0	0	0	0	0	0		Z(786)	645.31	0	527.28	0	761.32	0	413.39	0	0	0	0	0	0	0			Y(786)	0	1	0	0	4	0	2	0	0	0	0	1	0	0		Z(786)
Y(787)	1	0	1	0	1	0	1	0	0	0	0	0	0	0		Z(787)	645.52	0	527.39	0	761.42	0	413.57	0	0	0	0	0	0	0			Y(787)	0	1	0	0	1	0	2	0	0	0	0	1	0	0		Z(787)
Y(788)	1	0	1	0	1	0	1	0	0	0	0	0	0	0		Z(788)	647.98	0	527.55	0	761.58	0	413.7	0	0	0	0	0	0	0			Y(788)	0	1	0	0	1	0	1	0	0	0	0	1	0	0		Z(788)
Y(789)	1	0	3	0	1	0	1	0	0	0	0	0	0	0		Z(789)	648.06	0	527.66	0	761.68	0	413.86	0	0	0	0	0	0	0			Y(789)	0	1	0	0	1	0	1	0	0	0	0	1	0	0		Z(789)
Y(790)	1	0	0	0	1	0	1	0	0	0	0	0	0	0		Z(790)	648.29	0	0	0	761.89	0	414.04	0	0	0	0	0	0	0			Y(790)	0	1	0	0	1	0	1	0	0	0	0	1	0	0		Z(790)
Y(791)	1	0	0	0	4	0	4	0	0	0	0	0	0	0		Z(791)	657.65	0	0	0	763.19	0	415.39	0	0	0	0	0	0	0			Y(791)	0	1	0	0	1	0	1	0	0	0	0	4	0	0		Z(791)
Y(792)	1	0	0	0	1	0	1	0	0	0	0	0	0	0		Z(792)	658.52	0	0	0	764.14	0	416.7	0	0	0	0	0	0	0			Y(792)	0	1	0	0	4	0	4	0	0	0	0	4	0	0		Z(792)
Y(793)	1	0	0	0	1	0	1	0	0	0	0	0	0	0		Z(793)	661.17	0	0	0	764.28	0	416.78	0	0	0	0	0	0	0			Y(793)	0	4	0	0	1	0	1	0	0	0	0	1	0	0		Z(793)
Y(794)	1	0	0	0	1	0	1	0	0	0	0	0	0	0		Z(794)	661.3	0	0	0	764.5	0	416.9	0	0	0	0	0	0	0			Y(794)	0	1	0	0	1	0	1	0	0	0	0	1	0	0		Z(794)
Y(795)	1	0	0	0	1	0	1	0	0	0	0	0	0	0		Z(795)	661.48	0	0	0	764.76	0	417.28	0	0	0	0	0	0	0			Y(795)	0	1	0	0	1	0	1	0	0	0	0	1	0	0		Z(795)
Y(796)	1	0	0	0	1	0	1	0	0	0	0	0	0	0		Z(796)	662.12	0	0	0	765.05	0	417.46	0	0	0	0	0	0	0			Y(796)	0	1	0	0	1	0	1	0	0	0	0	1	0	0		Z(796)
Y(797)	1	0	0	0	1	0	1	0	0	0	0	0	0	0		Z(797)	662.45	0	0	0	765.16	0	417.72	0	0	0	0	0	0	0			Y(797)	0	1	0	0	1	0	1	0	0	0	0	1	0	0		Z(797)
Y(798)	1	0	0	0	1	0	1	0	0	0	0	0	0	0		Z(798)	662.56	0	0	0	765.85	0	418.05	0	0	0	0	0	0	0			Y(798)	0	1	0	0	1	0	1	0	0	0	0	1	0	0		Z(798)
Y(799)	4	0	0	0	4	0	1	0	0	0	0	0	0	0		Z(799)	667.19	0	0	0	766.99	0	418.18	0	0	0	0	0	0	0			Y(799)	0	1	0	0	1	0	1	0	0	0	0	4	0	0		Z(799)
Y(800)	1	0	0	0	1	0	4	0	0	0	0	0	0	0		Z(800)	668.15	0	0	0	767.98	0	419.39	0	0	0	0	0	0	0			Y(800)	0	1	0	0	4	0	1	0	0	0	0	1	0	0		Z(800)
Y(801)	1	0	0	0	1	0	1	0	0	0	0	0	0	0		Z(801)	668.54	0	0	0	768.2	0	420.27	0	0	0	0	0	0	0			Y(801)	0	1	0	0	1	0	1	0	0	0	0	1	0	0		Z(801)
Y(802)	1	0	0	0	1	0	1	0	0	0	0	0	0	0		Z(802)	668.79	0	0	0	768.42	0	420.34	0	0	0	0	0	0	0			Y(802)	0	1	0	0	1	0	1	0	0	0	0	1	0	0		Z(802)
Y(803)	1	0	0	0	1	0	1	0	0	0	0	0	0	0		Z(803)	668.97	0	0	0	768.78	0	420.51	0	0	0	0	0	0	0			Y(803)	0	1	0	0	1	0	1	0	0	0	0	1	0	0		Z(803)
Y(804)	1	0	0	0	1	0	1	0	0	0	0	0	0	0		Z(804)	669.1	0	0	0	768.91	0	420.59	0	0	0	0	0	0	0			Y(804)	0	4	0	0	1	0	1	0	0	0	0	1	0	0		Z(804)
Y(805)	1	0	0	0	1	0	1	0	0	0	0	0	0	0		Z(805)	670.69	0	0	0	769.1	0	420.84	0	0	0	0	0	0	0			Y(805)	0	1	0	0	1	0	4	0	0	0	0	1	0	0		Z(805)
Y(806)	1	0	0	0	1	0	1	0	0	0	0	0	0	0		Z(806)	671.12	0	0	0	770.04	0	421.7	0	0	0	0	0	0	0			Y(806)	0	1	0	0	1	0	4	0	0	0	0	4	0	0		Z(806)
Y(807)	1	0	0	0	4	0	1	0	0	0	0	0	0	0		Z(807)	671.83	0	0	0	771.59	0	422.11	0	0	0	0	0	0	0			Y(807)	0	1	0	0	1	0	1	0	0	0	0	1	0	0		Z(807)
Y(808)	4	0	0	0	1	0	4	0	0	0	0	0	0	0		Z(808)	672.79	0	0	0	772.86	0	423.19	0	0	0	0	0	0	0			Y(808)	0	1	0	0	1	0	1	0	0	0	0	1	0	0		Z(808)
Y(809)	1	0	0	0	1	0	1	0	0	0	0	0	0	0		Z(809)	673.53	0	0	0	772.96	0	424.3	0	0	0	0	0	0	0			Y(809)	0	1	0	0	4	0	1	0	0	0	0	1	0	0		Z(809)
Y(810)	1	0	0	0	1	0	1	0	0	0	0	0	0	0		Z(810)	673.83	0	0	0	773.26	0	424.41	0	0	0	0	0	0	0			Y(810)	0	1	0	0	1	0	4	0	0	0	0	1	0	0		Z(810)
Y(811)	1	0	0	0	1	0	1	0	0	0	0	0	0	0		Z(811)	673.97	0	0	0	773.38	0	424.49	0	0	0	0	0	0	0			Y(811)	0	1	0	0	1	0	1	0	0	0	0	1	0	0		Z(811)
Y(812)	1	0	0	0	1	0	1	0	0	0	0	0	0	0		Z(812)	674.2	0	0	0	773.51	0	425.02	0	0	0	0	0	0	0			Y(812)	0	1	0	0	1	0	1	0	0	0	0	1	0	0		Z(812)
Y(813)	4	0	0	0	1	0	1	0	0	0	0	0	0	0		Z(813)	675.19	0	0	0	773.61	0	425.08	0	0	0	0	0	0	0			Y(813)	0	3	0	0	1	0	1	0	0	0	0	1	0	0		Z(813)
Y(814)	1	0	0	0	1	0	1	0	0	0	0	0	0	0		Z(814)	675.88	0	0	0	773.73	0	425.22	0	0	0	0	0	0	0			Y(814)	0	0	0	0	1	0	1	0	0	0	0	3	0	0		Z(814)
Y(815)	1	0	0	0	1	0	1	0	0	0	0	0	0	0		Z(815)	676.23	0	0	0	774.56	0	425.42	0	0	0	0	0	0	0			Y(815)	0	0	0	0	1	0	1	0	0	0	0	1	0	0		Z(815)
Y(816)	1	0	0	0	1	0	1	0	0	0	0	0	0	0		Z(816)	676.34	0	0	0	776.99	0	425.54	0	0	0	0	0	0	0			Y(816)	0	0	0	0	1	0	1	0	0	0	0	4	0	0		Z(816)
Y(817)	1	0	0	0	1	0	3	0	0	0	0	0	0	0		Z(817)	676.78	0	0	0	777.2	0	425.65	0	0	0	0	0	0	0			Y(817)	0	0	0	0	1	0	1	0	0	0	0	1	0	0		Z(817)
Y(818)	4	0	0	0	1	0	1	0	0	0	0	0	0	0		Z(818)	678.19	0	0	0	777.54	0	425.87	0	0	0	0	0	0	0			Y(818)	0	0	0	0	4	0	4	0	0	0	0	1	0	0		Z(818)
Y(819)	1	0	0	0	1	0	1	0	0	0	0	0	0	0		Z(819)	678.59	0	0	0	778.04	0	426.04	0	0	0	0	0	0	0			Y(819)	0	0	0	0	1	0	1	0	0	0	0	1	0	0		Z(819)
Y(820)	1	0	0	0	1	0	4	0	0	0	0	0	0	0		Z(820)	678.78	0	0	0	778.49	0	426.99	0	0	0	0	0	0	0			Y(820)	0	0	0	0	1	0	1	0	0	0	0	1	0	0		Z(820)
Y(821)	1	0	0	0	1	0	4	0	0	0	0	0	0	0		Z(821)	679.11	0	0	0	778.61	0	431.19	0	0	0	0	0	0	0			Y(821)	0	0	0	0	1	0	1	0	0	0	0	1	0	0		Z(821)
Y(822)	1	0	0	0	1	0	1	0	0	0	0	0	0	0		Z(822)	679.21	0	0	0	778.74	0	432.16	0	0	0	0	0	0	0			Y(822)	0	0	0	0	4	0	1	0	0	0	0	1	0	0		Z(822)
Y(823)	1	0	0	0	1	0	1	0	0	0	0	0	0	0		Z(823)	679.34	0	0	0	778.95	0	432.27	0	0	0	0	0	0	0			Y(823)	0	0	0	0	1	0	1	0	0	0	0	4	0	0		Z(823)
Y(824)	1	0	0	0	1	0	1	0	0	0	0	0	0	0		Z(824)	679.57	0	0	0	779.28	0	432.56	0	0	0	0	0	0	0			Y(824)	0	0	0	0	1	0	1	0	0	0	0	1	0	0		Z(824)
Y(825)	4	0	0	0	4	0	1	0	0	0	0	0	0	0		Z(825)	680.59	0	0	0	780.19	0	432.67	0	0	0	0	0	0	0			Y(825)	0	0	0	0	1	0	1	0	0	0	0	1	0	0		Z(825)
Y(826)	1	0	0	0	1	0	1	0	0	0	0	0	0	0		Z(826)	681.28	0	0	0	781.2	0	432.9	0	0	0	0	0	0	0			Y(826)	0	0	0	0	1	0	1	0	0	0	0	1	0	0		Z(826)
Y(827)	1	0	0	0	1	0	1	0	0	0	0	0	0	0		Z(827)	681.47	0	0	0	781.32	0	433.03	0	0	0	0	0	0	0			Y(827)	0	0	0	0	1	0	4	0	0	0	0	1	0	0		Z(827)
Y(828)	1	0	0	0	1	0	1	0	0	0	0	0	0	0		Z(828)	681.61	0	0	0	781.67	0	433.28	0	0	0	0	0	0	0			Y(828)	0	0	0	0	1	0	1	0	0	0	0	1	0	0		Z(828)
Y(829)	1	0	0	0	1	0	1	0	0	0	0	0	0	0		Z(829)	681.73	0	0	0	781.85	0	433.53	0	0	0	0	0	0	0			Y(829)	0	0	0	0	1	0	1	0	0	0	0	1	0	0		Z(829)
Y(830)	1	0	0	0	1	0	1	0	0	0	0	0	0	0		Z(830)	681.98	0	0	0	782.01	0	433.67	0	0	0	0	0	0	0			Y(830)	0	0	0	0	1	0	4	0	0	0	0	1	0	0		Z(830)
Y(831)	1	0	0	0	1	0	1	0	0	0	0	0	0	0		Z(831)	682.07	0	0	0	783.08	0	433.85	0	0	0	0	0	0	0			Y(831)	0	0	0	0	1	0	1	0	0	0	0	1	0	0		Z(831)
Y(832)	1	0	0	0	1	0	1	0	0	0	0	0	0	0		Z(832)	684.06	0	0	0	783.17	0	434.09	0	0	0	0	0	0	0			Y(832)	0	0	0	0	1	0	1	0	0	0	0	1	0	0		Z(832)
Y(833)	1	0	0	0	1	0	4	0	0	0	0	0	0	0		Z(833)	684.2	0	0	0	783.94	0	434.79	0	0	0	0	0	0	0			Y(833)	0	0	0	0	1	0	1	0	0	0	0	1	0	0		Z(833)
Y(834)	1	0	0	0	1	0	1	0	0	0	0	0	0	0		Z(834)	686.05	0	0	0	784.47	0	435.8	0	0	0	0	0	0	0			Y(834)	0	0	0	0	1	0	1	0	0	0	0	4	0	0		Z(834)
Y(835)	1	0	0	0	1	0	1	0	0	0	0	0	0	0		Z(835)	686.17	0	0	0	785.15	0	436	0	0	0	0	0	0	0			Y(835)	0	0	0	0	1	0	1	0	0	0	0	1	0	0		Z(835)
Y(836)	1	0	0	0	4	0	1	0	0	0	0	0	0	0		Z(836)	686.3	0	0	0	786.39	0	436.11	0	0	0	0	0	0	0			Y(836)	0	0	0	0	1	0	1	0	0	0	0	1	0	0		Z(836)
Y(837)	1	0	0	0	1	0	1	0	0	0	0	0	0	0		Z(837)	686.49	0	0	0	787.19	0	436.23	0	0	0	0	0	0	0			Y(837)	0	0	0	0	1	0	1	0	0	0	0	1	0	0		Z(837)
Y(838)	1	0	0	0	1	0	1	0	0	0	0	0	0	0		Z(838)	686.61	0	0	0	787.33	0	436.32	0	0	0	0	0	0	0			Y(838)	0	0	0	0	1	0	1	0	0	0	0	1	0	0		Z(838)
Y(839)	1	0	0	0	1	0	1	0	0	0	0	0	0	0		Z(839)	686.76	0	0	0	788.18	0	436.63	0	0	0	0	0	0	0			Y(839)	0	0	0	0	1	0	4	0	0	0	0	1	0	0		Z(839)
Y(840)	1	0	0	0	1	0	1	0	0	0	0	0	0	0		Z(840)	686.88	0	0	0	788.47	0	436.76	0	0	0	0	0	0	0			Y(840)	0	0	0	0	1	0	1	0	0	0	0	1	0	0		Z(840)
Y(841)	1	0	0	0	1	0	1	0	0	0	0	0	0	0		Z(841)	687.29	0	0	0	788.51	0	436.91	0	0	0	0	0	0	0			Y(841)	0	0	0	0	1	0	1	0	0	0	0	1	0	0		Z(841)
Y(842)	1	0	0	0	1	0	4	0	0	0	0	0	0	0		Z(842)	690.57	0	0	0	788.62	0	437.99	0	0	0	0	0	0	0			Y(842)	0	0	0	0	1	0	1	0	0	0	0	4	0	0		Z(842)
Y(843)	3	0	0	0	1	0	1	0	0	0	0	0	0	0		Z(843)	690.68	0	0	0	788.89	0	438.75	0	0	0	0	0	0	0			Y(843)	0	0	0	0	1	0	1	0	0	0	0	1	0	0		Z(843)
Y(844)	4	0	0	0	1	0	1	0	0	0	0	0	0	0		Z(844)	691.99	0	0	0	789.43	0	439.18	0	0	0	0	0	0	0			Y(844)	0	0	0	0	1	0	1	0	0	0	0	1	0	0		Z(844)
Y(845)	1	0	0	0	1	0	1	0	0	0	0	0	0	0		Z(845)	704.08	0	0	0	789.57	0	439.37	0	0	0	0	0	0	0			Y(845)	0	0	0	0	1	0	1	0	0	0	0	1	0	0		Z(845)
Y(846)	1	0	0	0	1	0	1	0	0	0	0	0	0	0		Z(846)	704.22	0	0	0	789.71	0	439.5	0	0	0	0	0	0	0			Y(846)	0	0	0	0	1	0	1	0	0	0	0	1	0	0		Z(846)
Y(847)	1	0	0	0	3	0	1	0	0	0	0	0	0	0		Z(847)	704.58	0	0	0	789.82	0	439.65	0	0	0	0	0	0	0			Y(847)	0	0	0	0	1	0	3	0	0	0	0	1	0	0		Z(847)
Y(848)	1	0	0	0	0	0	1	0	0	0	0	0	0	0		Z(848)	708.29	0	0	0	0	0	439.72	0	0	0	0	0	0	0			Y(848)	0	0	0	0	1	0	1	0	0	0	0	1	0	0		Z(848)
Y(849)	1	0	0	0	0	0	1	0	0	0	0	0	0	0		Z(849)	708.42	0	0	0	0	0	440.23	0	0	0	0	0	0	0			Y(849)	0	0	0	0	1	0	1	0	0	0	0	1	0	0		Z(849)
Y(850)	1	0	0	0	0	0	1	0	0	0	0	0	0	0		Z(850)	711.16	0	0	0	0	0	440.55	0	0	0	0	0	0	0			Y(850)	0	0	0	0	1	0	1	0	0	0	0	4	0	0		Z(850)
Y(851)	1	0	0	0	0	0	4	0	0	0	0	0	0	0		Z(851)	711.7	0	0	0	0	0	441.39	0	0	0	0	0	0	0			Y(851)	0	0	0	0	3	0	1	0	0	0	0	1	0	0		Z(851)
Y(852)	1	0	0	0	0	0	1	0	0	0	0	0	0	0		Z(852)	711.9	0	0	0	0	0	442.57	0	0	0	0	0	0	0			Y(852)	0	0	0	0	1	0	1	0	0	0	0	1	0	0		Z(852)
Y(853)	1	0	0	0	0	0	1	0	0	0	0	0	0	0		Z(853)	712.27	0	0	0	0	0	442.65	0	0	0	0	0	0	0			Y(853)	0	0	0	0	1	0	4	0	0	0	0	1	0	0		Z(853)
Y(854)	4	0	0	0	0	0	1	0	0	0	0	0	0	0		Z(854)	713.99	0	0	0	0	0	442.77	0	0	0	0	0	0	0			Y(854)	0	0	0	0	1	0	4	0	0	0	0	1	0	0		Z(854)
Y(855)	1	0	0	0	0	0	1	0	0	0	0	0	0	0		Z(855)	714.9	0	0	0	0	0	442.83	0	0	0	0	0	0	0			Y(855)	0	0	0	0	1	0	1	0	0	0	0	1	0	0		Z(855)
Y(856)	1	0	0	0	0	0	1	0	0	0	0	0	0	0		Z(856)	715.42	0	0	0	0	0	442.93	0	0	0	0	0	0	0			Y(856)	0	0	0	0	3	0	1	0	0	0	0	1	0	0		Z(856)
Y(857)	1	0	0	0	0	0	1	0	0	0	0	0	0	0		Z(857)	715.52	0	0	0	0	0	443.14	0	0	0	0	0	0	0			Y(857)	0	0	0	0	1	0	1	0	0	0	0	1	0	0		Z(857)
Y(858)	1	0	0	0	0	0	1	0	0	0	0	0	0	0		Z(858)	715.93	0	0	0	0	0	443.26	0	0	0	0	0	0	0			Y(858)	0	0	0	0	1	0	1	0	0	0	0	1	0	0		Z(858)
Y(859)	1	0	0	0	0	0	1	0	0	0	0	0	0	0		Z(859)	716.72	0	0	0	0	0	443.61	0	0	0	0	0	0	0			Y(859)	0	0	0	0	1	0	1	0	0	0	0	4	0	0		Z(859)
Y(860)	1	0	0	0	0	0	1	0	0	0	0	0	0	0		Z(860)	718.62	0	0	0	0	0	443.72	0	0	0	0	0	0	0			Y(860)	0	0	0	0	1	0	1	0	0	0	0	1	0	0		Z(860)
Y(861)	1	0	0	0	0	0	1	0	0	0	0	0	0	0		Z(861)	719.03	0	0	0	0	0	443.84	0	0	0	0	0	0	0			Y(861)	0	0	0	0	4	0	1	0	0	0	0	1	0	0		Z(861)
Y(862)	1	0	0	0	0	0	1	0	0	0	0	0	0	0		Z(862)	719.22	0	0	0	0	0	444	0	0	0	0	0	0	0			Y(862)	0	0	0	0	4	0	1	0	0	0	0	1	0	0		Z(862)
Y(863)	1	0	0	0	0	0	1	0	0	0	0	0	0	0		Z(863)	719.42	0	0	0	0	0	444.11	0	0	0	0	0	0	0			Y(863)	0	0	0	0	1	0	1	0	0	0	0	1	0	0		Z(863)
Y(864)	1	0	0	0	0	0	1	0	0	0	0	0	0	0		Z(864)	720.13	0	0	0	0	0	444.27	0	0	0	0	0	0	0			Y(864)	0	0	0	0	1	0	1	0	0	0	0	1	0	0		Z(864)
Y(865)	1	0	0	0	0	0	1	0	0	0	0	0	0	0		Z(865)	722.24	0	0	0	0	0	444.52	0	0	0	0	0	0	0			Y(865)	0	0	0	0	1	0	1	0	0	0	0	1	0	0		Z(865)
Y(866)	1	0	0	0	0	0	1	0	0	0	0	0	0	0		Z(866)	722.61	0	0	0	0	0	444.64	0	0	0	0	0	0	0			Y(866)	0	0	0	0	1	0	1	0	0	0	0	1	0	0		Z(866)
Y(867)	1	0	0	0	0	0	4	0	0	0	0	0	0	0		Z(867)	722.73	0	0	0	0	0	446.19	0	0	0	0	0	0	0			Y(867)	0	0	0	0	4	0	4	0	0	0	0	1	0	0		Z(867)
Y(868)	3	0	0	0	0	0	1	0	0	0	0	0	0	0		Z(868)	722.84	0	0	0	0	0	447.77	0	0	0	0	0	0	0			Y(868)	0	0	0	0	1	0	1	0	0	0	0	4	0	0		Z(868)
Y(869)	1	0	0	0	0	0	1	0	0	0	0	0	0	0		Z(869)	723.7	0	0	0	0	0	448.07	0	0	0	0	0	0	0			Y(869)	0	0	0	0	1	0	1	0	0	0	0	1	0	0		Z(869)
Y(870)	4	0	0	0	0	0	1	0	0	0	0	0	0	0		Z(870)	724.59	0	0	0	0	0	448.59	0	0	0	0	0	0	0			Y(870)	0	0	0	0	1	0	1	0	0	0	0	1	0	0		Z(870)
Y(871)	1	0	0	0	0	0	1	0	0	0	0	0	0	0		Z(871)	736.99	0	0	0	0	0	448.7	0	0	0	0	0	0	0			Y(871)	0	0	0	0	1	0	1	0	0	0	0	1	0	0		Z(871)
Y(872)	1	0	0	0	0	0	1	0	0	0	0	0	0	0		Z(872)	737.36	0	0	0	0	0	448.91	0	0	0	0	0	0	0			Y(872)	0	0	0	0	4	0	1	0	0	0	0	1	0	0		Z(872)
Y(873)	1	0	0	0	0	0	1	0	0	0	0	0	0	0		Z(873)	737.44	0	0	0	0	0	449.08	0	0	0	0	0	0	0			Y(873)	0	0	0	0	1	0	1	0	0	0	0	1	0	0		Z(873)
Y(874)	1	0	0	0	0	0	1	0	0	0	0	0	0	0		Z(874)	737.84	0	0	0	0	0	449.2	0	0	0	0	0	0	0			Y(874)	0	0	0	0	1	0	1	0	0	0	0	1	0	0		Z(874)
Y(875)	4	0	0	0	0	0	1	0	0	0	0	0	0	0		Z(875)	739.39	0	0	0	0	0	449.35	0	0	0	0	0	0	0			Y(875)	0	0	0	0	1	0	1	0	0	0	0	1	0	0		Z(875)
Y(876)	1	0	0	0	0	0	1	0	0	0	0	0	0	0		Z(876)	740.31	0	0	0	0	0	449.49	0	0	0	0	0	0	0			Y(876)	0	0	0	0	1	0	4	0	0	0	0	3	0	0		Z(876)
Y(877)	1	0	0	0	0	0	4	0	0	0	0	0	0	0		Z(877)	740.66	0	0	0	0	0	450.79	0	0	0	0	0	0	0			Y(877)	0	0	0	0	1	0	1	0	0	0	0	1	0	0		Z(877)
Y(878)	1	0	0	0	0	0	1	0	0	0	0	0	0	0		Z(878)	741.03	0	0	0	0	0	451.67	0	0	0	0	0	0	0			Y(878)	0	0	0	0	1	0	1	0	0	0	0	1	0	0		Z(878)
Y(879)	1	0	0	0	0	0	1	0	0	0	0	0	0	0		Z(879)	741.15	0	0	0	0	0	451.77	0	0	0	0	0	0	0			Y(879)	0	0	0	0	4	0	1	0	0	0	0	1	0	0		Z(879)
Y(880)	1	0	0	0	0	0	1	0	0	0	0	0	0	0		Z(880)	741.88	0	0	0	0	0	452.16	0	0	0	0	0	0	0			Y(880)	0	0	0	0	1	0	1	0	0	0	0	4	0	0		Z(880)
Y(881)	1	0	0	0	0	0	1	0	0	0	0	0	0	0		Z(881)	742.04	0	0	0	0	0	452.36	0	0	0	0	0	0	0			Y(881)	0	0	0	0	1	0	1	0	0	0	0	4	0	0		Z(881)
Y(882)	1	0	0	0	0	0	1	0	0	0	0	0	0	0		Z(882)	743.96	0	0	0	0	0	452.49	0	0	0	0	0	0	0			Y(882)	0	0	0	0	1	0	1	0	0	0	0	1	0	0		Z(882)
Y(883)	1	0	0	0	0	0	1	0	0	0	0	0	0	0		Z(883)	744.18	0	0	0	0	0	452.74	0	0	0	0	0	0	0			Y(883)	0	0	0	0	1	0	1	0	0	0	0	1	0	0		Z(883)
Y(884)	1	0	0	0	0	0	1	0	0	0	0	0	0	0		Z(884)	744.61	0	0	0	0	0	452.88	0	0	0	0	0	0	0			Y(884)	0	0	0	0	1	0	1	0	0	0	0	4	0	0		Z(884)
Y(885)	1	0	0	0	0	0	1	0	0	0	0	0	0	0		Z(885)	746.54	0	0	0	0	0	453	0	0	0	0	0	0	0			Y(885)	0	0	0	0	1	0	1	0	0	0	0	1	0	0		Z(885)
Y(886)	1	0	0	0	0	0	1	0	0	0	0	0	0	0		Z(886)	746.81	0	0	0	0	0	453.43	0	0	0	0	0	0	0			Y(886)	0	0	0	0	1	0	1	0	0	0	0	1	0	0		Z(886)
Y(887)	1	0	0	0	0	0	1	0	0	0	0	0	0	0		Z(887)	747.51	0	0	0	0	0	453.65	0	0	0	0	0	0	0			Y(887)	0	0	0	0	1	0	1	0	0	0	0	1	0	0		Z(887)
Y(888)	1	0	0	0	0	0	1	0	0	0	0	0	0	0		Z(888)	751.85	0	0	0	0	0	453.79	0	0	0	0	0	0	0			Y(888)	0	0	0	0	4	0	1	0	0	0	0	1	0	0		Z(888)
Y(889)	1	0	0	0	0	0	1	0	0	0	0	0	0	0		Z(889)	754.11	0	0	0	0	0	453.96	0	0	0	0	0	0	0			Y(889)	0	0	0	0	1	0	1	0	0	0	0	1	0	0		Z(889)
Y(890)	1	0	0	0	0	0	4	0	0	0	0	0	0	0		Z(890)	754.68	0	0	0	0	0	454.99	0	0	0	0	0	0	0			Y(890)	0	0	0	0	1	0	4	0	0	0	0	1	0	0		Z(890)
Y(891)	1	0	0	0	0	0	1	0	0	0	0	0	0	0		Z(891)	755.43	0	0	0	0	0	456.15	0	0	0	0	0	0	0			Y(891)	0	0	0	0	1	0	1	0	0	0	0	1	0	0		Z(891)
Y(892)	1	0	0	0	0	0	1	0	0	0	0	0	0	0		Z(892)	755.55	0	0	0	0	0	456.34	0	0	0	0	0	0	0			Y(892)	0	0	0	0	1	0	1	0	0	0	0	1	0	0		Z(892)
Y(893)	1	0	0	0	0	0	4	0	0	0	0	0	0	0		Z(893)	757.69	0	0	0	0	0	457.99	0	0	0	0	0	0	0			Y(893)	0	0	0	0	1	0	1	0	0	0	0	1	0	0		Z(893)
Y(894)	1	0	0	0	0	0	1	0	0	0	0	0	0	0		Z(894)	757.83	0	0	0	0	0	458.86	0	0	0	0	0	0	0			Y(894)	0	0	0	0	1	0	1	0	0	0	0	1	0	0		Z(894)
Y(895)	1	0	0	0	0	0	1	0	0	0	0	0	0	0		Z(895)	757.99	0	0	0	0	0	459.18	0	0	0	0	0	0	0			Y(895)	0	0	0	0	1	0	1	0	0	0	0	4	0	0		Z(895)
Y(896)	1	0	0	0	0	0	1	0	0	0	0	0	0	0		Z(896)	758.18	0	0	0	0	0	459.31	0	0	0	0	0	0	0			Y(896)	0	0	0	0	1	0	1	0	0	0	0	1	0	0		Z(896)
Y(897)	1	0	0	0	0	0	1	0	0	0	0	0	0	0		Z(897)	760.9	0	0	0	0	0	459.74	0	0	0	0	0	0	0			Y(897)	0	0	0	0	1	0	1	0	0	0	0	1	0	0		Z(897)
Y(898)	1	0	0	0	0	0	1	0	0	0	0	0	0	0		Z(898)	761.05	0	0	0	0	0	459.8	0	0	0	0	0	0	0			Y(898)	0	0	0	0	1	0	1	0	0	0	0	1	0	0		Z(898)
Y(899)	1	0	0	0	0	0	1	0	0	0	0	0	0	0		Z(899)	761.17	0	0	0	0	0	459.95	0	0	0	0	0	0	0			Y(899)	0	0	0	0	1	0	4	0	0	0	0	1	0	0		Z(899)
Y(900)	1	0	0	0	0	0	1	0	0	0	0	0	0	0		Z(900)	761.29	0	0	0	0	0	460.26	0	0	0	0	0	0	0			Y(900)	0	0	0	0	1	0	1	0	0	0	0	1	0	0		Z(900)
Y(901)	1	0	0	0	0	0	1	0	0	0	0	0	0	0		Z(901)	761.69	0	0	0	0	0	460.39	0	0	0	0	0	0	0			Y(901)	0	0	0	0	1	0	1	0	0	0	0	1	0	0		Z(901)
Y(902)	1	0	0	0	0	0	1	0	0	0	0	0	0	0		Z(902)	761.8	0	0	0	0	0	460.69	0	0	0	0	0	0	0			Y(902)	0	0	0	0	1	0	1	0	0	0	0	1	0	0		Z(902)
Y(903)	1	0	0	0	0	0	1	0	0	0	0	0	0	0		Z(903)	766.89	0	0	0	0	0	460.86	0	0	0	0	0	0	0			Y(903)	0	0	0	0	1	0	1	0	0	0	0	1	0	0		Z(903)
Y(904)	1	0	0	0	0	0	4	0	0	0	0	0	0	0		Z(904)	767.31	0	0	0	0	0	462.39	0	0	0	0	0	0	0			Y(904)	0	0	0	0	1	0	1	0	0	0	0	1	0	0		Z(904)
Y(905)	1	0	0	0	0	0	4	0	0	0	0	0	0	0		Z(905)	767.44	0	0	0	0	0	463.39	0	0	0	0	0	0	0			Y(905)	0	0	0	0	4	0	1	0	0	0	0	3	0	0		Z(905)
Y(906)	1	0	0	0	0	0	1	0	0	0	0	0	0	0		Z(906)	767.93	0	0	0	0	0	464.39	0	0	0	0	0	0	0			Y(906)	0	0	0	0	1	0	1	0	0	0	0	0	0	0		Z(906)
Y(907)	1	0	0	0	0	0	1	0	0	0	0	0	0	0		Z(907)	770.08	0	0	0	0	0	464.5	0	0	0	0	0	0	0			Y(907)	0	0	0	0	1	0	1	0	0	0	0	0	0	0		Z(907)
Y(908)	1	0	0	0	0	0	1	0	0	0	0	0	0	0		Z(908)	770.31	0	0	0	0	0	464.69	0	0	0	0	0	0	0			Y(908)	0	0	0	0	1	0	4	0	0	0	0	0	0	0		Z(908)
Y(909)	3	0	0	0	0	0	1	0	0	0	0	0	0	0		Z(909)	770.42	0	0	0	0	0	464.82	0	0	0	0	0	0	0			Y(909)	0	0	0	0	4	0	1	0	0	0	0	0	0	0		Z(909)
Y(910)	0	0	0	0	0	0	1	0	0	0	0	0	0	0		Z(910)	0	0	0	0	0	0	464.9	0	0	0	0	0	0	0			Y(910)	0	0	0	0	1	0	1	0	0	0	0	0	0	0		Z(910)
Y(911)	0	0	0	0	0	0	1	0	0	0	0	0	0	0		Z(911)	0	0	0	0	0	0	465.21	0	0	0	0	0	0	0			Y(911)	0	0	0	0	1	0	1	0	0	0	0	0	0	0		Z(911)
Y(912)	0	0	0	0	0	0	1	0	0	0	0	0	0	0		Z(912)	0	0	0	0	0	0	465.45	0	0	0	0	0	0	0			Y(912)	0	0	0	0	1	0	1	0	0	0	0	0	0	0		Z(912)
Y(913)	0	0	0	0	0	0	3	0	0	0	0	0	0	0		Z(913)	0	0	0	0	0	0	465.56	0	0	0	0	0	0	0			Y(913)	0	0	0	0	1	0	1	0	0	0	0	0	0	0		Z(913)
Y(914)	0	0	0	0	0	0	1	0	0	0	0	0	0	0		Z(914)	0	0	0	0	0	0	465.74	0	0	0	0	0	0	0			Y(914)	0	0	0	0	1	0	4	0	0	0	0	0	0	0		Z(914)
Y(915)	0	0	0	0	0	0	1	0	0	0	0	0	0	0		Z(915)	0	0	0	0	0	0	465.89	0	0	0	0	0	0	0			Y(915)	0	0	0	0	1	0	1	0	0	0	0	0	0	0		Z(915)
Y(916)	0	0	0	0	0	0	1	0	0	0	0	0	0	0		Z(916)	0	0	0	0	0	0	466.04	0	0	0	0	0	0	0			Y(916)	0	0	0	0	1	0	1	0	0	0	0	0	0	0		Z(916)
Y(917)	0	0	0	0	0	0	4	0	0	0	0	0	0	0		Z(917)	0	0	0	0	0	0	466.79	0	0	0	0	0	0	0			Y(917)	0	0	0	0	4	0	1	0	0	0	0	0	0	0		Z(917)
Y(918)	0	0	0	0	0	0	4	0	0	0	0	0	0	0		Z(918)	0	0	0	0	0	0	471.39	0	0	0	0	0	0	0			Y(918)	0	0	0	0	1	0	1	0	0	0	0	0	0	0		Z(918)
Y(919)	0	0	0	0	0	0	1	0	0	0	0	0	0	0		Z(919)	0	0	0	0	0	0	472.22	0	0	0	0	0	0	0			Y(919)	0	0	0	0	1	0	1	0	0	0	0	0	0	0		Z(919)
Y(920)	0	0	0	0	0	0	1	0	0	0	0	0	0	0		Z(920)	0	0	0	0	0	0	472.44	0	0	0	0	0	0	0			Y(920)	0	0	0	0	1	0	1	0	0	0	0	0	0	0		Z(920)
Y(921)	0	0	0	0	0	0	1	0	0	0	0	0	0	0		Z(921)	0	0	0	0	0	0	472.58	0	0	0	0	0	0	0			Y(921)	0	0	0	0	1	0	1	0	0	0	0	0	0	0		Z(921)
Y(922)	0	0	0	0	0	0	1	0	0	0	0	0	0	0		Z(922)	0	0	0	0	0	0	472.7	0	0	0	0	0	0	0			Y(922)	0	0	0	0	1	0	4	0	0	0	0	0	0	0		Z(922)
Y(923)	0	0	0	0	0	0	1	0	0	0	0	0	0	0		Z(923)	0	0	0	0	0	0	473.14	0	0	0	0	0	0	0			Y(923)	0	0	0	0	4	0	1	0	0	0	0	0	0	0		Z(923)
Y(924)	0	0	0	0	0	0	4	0	0	0	0	0	0	0		Z(924)	0	0	0	0	0	0	474.39	0	0	0	0	0	0	0			Y(924)	0	0	0	0	1	0	1	0	0	0	0	0	0	0		Z(924)
Y(925)	0	0	0	0	0	0	1	0	0	0	0	0	0	0		Z(925)	0	0	0	0	0	0	475.2	0	0	0	0	0	0	0			Y(925)	0	0	0	0	1	0	1	0	0	0	0	0	0	0		Z(925)
Y(926)	0	0	0	0	0	0	1	0	0	0	0	0	0	0		Z(926)	0	0	0	0	0	0	475.33	0	0	0	0	0	0	0			Y(926)	0	0	0	0	1	0	1	0	0	0	0	0	0	0		Z(926)
Y(927)	0	0	0	0	0	0	1	0	0	0	0	0	0	0		Z(927)	0	0	0	0	0	0	475.42	0	0	0	0	0	0	0			Y(927)	0	0	0	0	1	0	1	0	0	0	0	0	0	0		Z(927)
Y(928)	0	0	0	0	0	0	1	0	0	0	0	0	0	0		Z(928)	0	0	0	0	0	0	475.52	0	0	0	0	0	0	0			Y(928)	0	0	0	0	1	0	1	0	0	0	0	0	0	0		Z(928)
Y(929)	0	0	0	0	0	0	1	0	0	0	0	0	0	0		Z(929)	0	0	0	0	0	0	475.62	0	0	0	0	0	0	0			Y(929)	0	0	0	0	1	0	4	0	0	0	0	0	0	0		Z(929)
Y(930)	0	0	0	0	0	0	1	0	0	0	0	0	0	0		Z(930)	0	0	0	0	0	0	475.74	0	0	0	0	0	0	0			Y(930)	0	0	0	0	1	0	4	0	0	0	0	0	0	0		Z(930)
Y(931)	0	0	0	0	0	0	1	0	0	0	0	0	0	0		Z(931)	0	0	0	0	0	0	476.06	0	0	0	0	0	0	0			Y(931)	0	0	0	0	1	0	1	0	0	0	0	0	0	0		Z(931)
Y(932)	0	0	0	0	0	0	1	0	0	0	0	0	0	0		Z(932)	0	0	0	0	0	0	476.25	0	0	0	0	0	0	0			Y(932)	0	0	0	0	1	0	1	0	0	0	0	0	0	0		Z(932)
Y(933)	0	0	0	0	0	0	1	0	0	0	0	0	0	0		Z(933)	0	0	0	0	0	0	476.38	0	0	0	0	0	0	0			Y(933)	0	0	0	0	4	0	1	0	0	0	0	0	0	0		Z(933)
Y(934)	0	0	0	0	0	0	4	0	0	0	0	0	0	0		Z(934)	0	0	0	0	0	0	477.59	0	0	0	0	0	0	0			Y(934)	0	0	0	0	1	0	1	0	0	0	0	0	0	0		Z(934)
Y(935)	0	0	0	0	0	0	1	0	0	0	0	0	0	0		Z(935)	0	0	0	0	0	0	478.56	0	0	0	0	0	0	0			Y(935)	0	0	0	0	1	0	1	0	0	0	0	0	0	0		Z(935)
Y(936)	0	0	0	0	0	0	1	0	0	0	0	0	0	0		Z(936)	0	0	0	0	0	0	478.99	0	0	0	0	0	0	0			Y(936)	0	0	0	0	1	0	1	0	0	0	0	0	0	0		Z(936)
Y(937)	0	0	0	0	0	0	1	0	0	0	0	0	0	0		Z(937)	0	0	0	0	0	0	479.55	0	0	0	0	0	0	0			Y(937)	0	0	0	0	1	0	1	0	0	0	0	0	0	0		Z(937)
Y(938)	0	0	0	0	0	0	1	0	0	0	0	0	0	0		Z(938)	0	0	0	0	0	0	479.78	0	0	0	0	0	0	0			Y(938)	0	0	0	0	1	0	1	0	0	0	0	0	0	0		Z(938)
Y(939)	0	0	0	0	0	0	1	0	0	0	0	0	0	0		Z(939)	0	0	0	0	0	0	479.9	0	0	0	0	0	0	0			Y(939)	0	0	0	0	1	0	1	0	0	0	0	0	0	0		Z(939)
Y(940)	0	0	0	0	0	0	1	0	0	0	0	0	0	0		Z(940)	0	0	0	0	0	0	480.03	0	0	0	0	0	0	0			Y(940)	0	0	0	0	4	0	1	0	0	0	0	0	0	0		Z(940)
Y(941)	0	0	0	0	0	0	1	0	0	0	0	0	0	0		Z(941)	0	0	0	0	0	0	480.15	0	0	0	0	0	0	0			Y(941)	0	0	0	0	1	0	4	0	0	0	0	0	0	0		Z(941)
Y(942)	0	0	0	0	0	0	1	0	0	0	0	0	0	0		Z(942)	0	0	0	0	0	0	480.37	0	0	0	0	0	0	0			Y(942)	0	0	0	0	1	0	1	0	0	0	0	0	0	0		Z(942)
Y(943)	0	0	0	0	0	0	1	0	0	0	0	0	0	0		Z(943)	0	0	0	0	0	0	480.51	0	0	0	0	0	0	0			Y(943)	0	0	0	0	1	0	1	0	0	0	0	0	0	0		Z(943)
Y(944)	0	0	0	0	0	0	4	0	0	0	0	0	0	0		Z(944)	0	0	0	0	0	0	481.39	0	0	0	0	0	0	0			Y(944)	0	0	0	0	1	0	1	0	0	0	0	0	0	0		Z(944)
Y(945)	0	0	0	0	0	0	1	0	0	0	0	0	0	0		Z(945)	0	0	0	0	0	0	482.25	0	0	0	0	0	0	0			Y(945)	0	0	0	0	1	0	1	0	0	0	0	0	0	0		Z(945)
Y(946)	0	0	0	0	0	0	1	0	0	0	0	0	0	0		Z(946)	0	0	0	0	0	0	482.39	0	0	0	0	0	0	0			Y(946)	0	0	0	0	4	0	1	0	0	0	0	0	0	0		Z(946)
Y(947)	0	0	0	0	0	0	1	0	0	0	0	0	0	0		Z(947)	0	0	0	0	0	0	482.5	0	0	0	0	0	0	0			Y(947)	0	0	0	0	1	0	1	0	0	0	0	0	0	0		Z(947)
Y(948)	0	0	0	0	0	0	1	0	0	0	0	0	0	0		Z(948)	0	0	0	0	0	0	483.08	0	0	0	0	0	0	0			Y(948)	0	0	0	0	1	0	1	0	0	0	0	0	0	0		Z(948)
Y(949)	0	0	0	0	0	0	1	0	0	0	0	0	0	0		Z(949)	0	0	0	0	0	0	483.23	0	0	0	0	0	0	0			Y(949)	0	0	0	0	1	0	1	0	0	0	0	0	0	0		Z(949)
Y(950)	0	0	0	0	0	0	1	0	0	0	0	0	0	0		Z(950)	0	0	0	0	0	0	483.4	0	0	0	0	0	0	0			Y(950)	0	0	0	0	1	0	1	0	0	0	0	0	0	0		Z(950)
Y(951)	0	0	0	0	0	0	1	0	0	0	0	0	0	0		Z(951)	0	0	0	0	0	0	483.47	0	0	0	0	0	0	0			Y(951)	0	0	0	0	1	0	4	0	0	0	0	0	0	0		Z(951)
Y(952)	0	0	0	0	0	0	4	0	0	0	0	0	0	0		Z(952)	0	0	0	0	0	0	484.99	0	0	0	0	0	0	0			Y(952)	0	0	0	0	1	0	1	0	0	0	0	0	0	0		Z(952)
Y(953)	0	0	0	0	0	0	1	0	0	0	0	0	0	0		Z(953)	0	0	0	0	0	0	485.77	0	0	0	0	0	0	0			Y(953)	0	0	0	0	1	0	1	0	0	0	0	0	0	0		Z(953)
Y(954)	0	0	0	0	0	0	1	0	0	0	0	0	0	0		Z(954)	0	0	0	0	0	0	486.35	0	0	0	0	0	0	0			Y(954)	0	0	0	0	1	0	1	0	0	0	0	0	0	0		Z(954)
Y(955)	0	0	0	0	0	0	1	0	0	0	0	0	0	0		Z(955)	0	0	0	0	0	0	486.62	0	0	0	0	0	0	0			Y(955)	0	0	0	0	1	0	1	0	0	0	0	0	0	0		Z(955)
Y(956)	0	0	0	0	0	0	1	0	0	0	0	0	0	0		Z(956)	0	0	0	0	0	0	487.22	0	0	0	0	0	0	0			Y(956)	0	0	0	0	1	0	1	0	0	0	0	0	0	0		Z(956)
Y(957)	0	0	0	0	0	0	4	0	0	0	0	0	0	0		Z(957)	0	0	0	0	0	0	487.99	0	0	0	0	0	0	0			Y(957)	0	0	0	0	1	0	1	0	0	0	0	0	0	0		Z(957)
Y(958)	0	0	0	0	0	0	1	0	0	0	0	0	0	0		Z(958)	0	0	0	0	0	0	488.8	0	0	0	0	0	0	0			Y(958)	0	0	0	0	1	0	1	0	0	0	0	0	0	0		Z(958)
Y(959)	0	0	0	0	0	0	1	0	0	0	0	0	0	0		Z(959)	0	0	0	0	0	0	488.91	0	0	0	0	0	0	0			Y(959)	0	0	0	0	1	0	3	0	0	0	0	0	0	0		Z(959)
Y(960)	0	0	0	0	0	0	1	0	0	0	0	0	0	0		Z(960)	0	0	0	0	0	0	489.55	0	0	0	0	0	0	0			Y(960)	0	0	0	0	1	0	1	0	0	0	0	0	0	0		Z(960)
Y(961)	0	0	0	0	0	0	1	0	0	0	0	0	0	0		Z(961)	0	0	0	0	0	0	489.84	0	0	0	0	0	0	0			Y(961)	0	0	0	0	4	0	1	0	0	0	0	0	0	0		Z(961)
Y(962)	0	0	0	0	0	0	1	0	0	0	0	0	0	0		Z(962)	0	0	0	0	0	0	490.18	0	0	0	0	0	0	0			Y(962)	0	0	0	0	1	0	1	0	0	0	0	0	0	0		Z(962)
Y(963)	0	0	0	0	0	0	1	0	0	0	0	0	0	0		Z(963)	0	0	0	0	0	0	490.3	0	0	0	0	0	0	0			Y(963)	0	0	0	0	1	0	1	0	0	0	0	0	0	0		Z(963)
Y(964)	0	0	0	0	0	0	1	0	0	0	0	0	0	0		Z(964)	0	0	0	0	0	0	490.45	0	0	0	0	0	0	0			Y(964)	0	0	0	0	1	0	4	0	0	0	0	0	0	0		Z(964)
Y(965)	0	0	0	0	0	0	1	0	0	0	0	0	0	0		Z(965)	0	0	0	0	0	0	490.58	0	0	0	0	0	0	0			Y(965)	0	0	0	0	1	0	1	0	0	0	0	0	0	0		Z(965)
Y(966)	0	0	0	0	0	0	1	0	0	0	0	0	0	0		Z(966)	0	0	0	0	0	0	490.77	0	0	0	0	0	0	0			Y(966)	0	0	0	0	1	0	1	0	0	0	0	0	0	0		Z(966)
Y(967)	0	0	0	0	0	0	4	0	0	0	0	0	0	0		Z(967)	0	0	0	0	0	0	491.79	0	0	0	0	0	0	0			Y(967)	0	0	0	0	1	0	1	0	0	0	0	0	0	0		Z(967)
Y(968)	0	0	0	0	0	0	1	0	0	0	0	0	0	0		Z(968)	0	0	0	0	0	0	492.49	0	0	0	0	0	0	0			Y(968)	0	0	0	0	1	0	1	0	0	0	0	0	0	0		Z(968)
Y(969)	0	0	0	0	0	0	1	0	0	0	0	0	0	0		Z(969)	0	0	0	0	0	0	493.15	0	0	0	0	0	0	0			Y(969)	0	0	0	0	1	0	1	0	0	0	0	0	0	0		Z(969)
Y(970)	0	0	0	0	0	0	1	0	0	0	0	0	0	0		Z(970)	0	0	0	0	0	0	493.41	0	0	0	0	0	0	0			Y(970)	0	0	0	0	1	0	1	0	0	0	0	0	0	0		Z(970)
Y(971)	0	0	0	0	0	0	1	0	0	0	0	0	0	0		Z(971)	0	0	0	0	0	0	493.57	0	0	0	0	0	0	0			Y(971)	0	0	0	0	1	0	1	0	0	0	0	0	0	0		Z(971)
Y(972)	0	0	0	0	0	0	1	0	0	0	0	0	0	0		Z(972)	0	0	0	0	0	0	493.99	0	0	0	0	0	0	0			Y(972)	0	0	0	0	1	0	1	0	0	0	0	0	0	0		Z(972)
Y(973)	0	0	0	0	0	0	1	0	0	0	0	0	0	0		Z(973)	0	0	0	0	0	0	494.15	0	0	0	0	0	0	0			Y(973)	0	0	0	0	1	0	1	0	0	0	0	0	0	0		Z(973)
Y(974)	0	0	0	0	0	0	4	0	0	0	0	0	0	0		Z(974)	0	0	0	0	0	0	495.59	0	0	0	0	0	0	0			Y(974)	0	0	0	0	1	0	1	0	0	0	0	0	0	0		Z(974)
Y(975)	0	0	0	0	0	0	1	0	0	0	0	0	0	0		Z(975)	0	0	0	0	0	0	496.32	0	0	0	0	0	0	0			Y(975)	0	0	0	0	1	0	1	0	0	0	0	0	0	0		Z(975)
Y(976)	0	0	0	0	0	0	1	0	0	0	0	0	0	0		Z(976)	0	0	0	0	0	0	496.42	0	0	0	0	0	0	0			Y(976)	0	0	0	0	4	0	4	0	0	0	0	0	0	0		Z(976)
Y(977)	0	0	0	0	0	0	1	0	0	0	0	0	0	0		Z(977)	0	0	0	0	0	0	496.62	0	0	0	0	0	0	0			Y(977)	0	0	0	0	1	0	1	0	0	0	0	0	0	0		Z(977)
Y(978)	0	0	0	0	0	0	1	0	0	0	0	0	0	0		Z(978)	0	0	0	0	0	0	496.68	0	0	0	0	0	0	0			Y(978)	0	0	0	0	1	0	1	0	0	0	0	0	0	0		Z(978)
Y(979)	0	0	0	0	0	0	1	0	0	0	0	0	0	0		Z(979)	0	0	0	0	0	0	496.83	0	0	0	0	0	0	0			Y(979)	0	0	0	0	1	0	1	0	0	0	0	0	0	0		Z(979)
Y(980)	0	0	0	0	0	0	1	0	0	0	0	0	0	0		Z(980)	0	0	0	0	0	0	496.93	0	0	0	0	0	0	0			Y(980)	0	0	0	0	1	0	1	0	0	0	0	0	0	0		Z(980)
Y(981)	0	0	0	0	0	0	1	0	0	0	0	0	0	0		Z(981)	0	0	0	0	0	0	497	0	0	0	0	0	0	0			Y(981)	0	0	0	0	1	0	1	0	0	0	0	0	0	0		Z(981)
Y(982)	0	0	0	0	0	0	3	0	0	0	0	0	0	0		Z(982)	0	0	0	0	0	0	497.11	0	0	0	0	0	0	0			Y(982)	0	0	0	0	1	0	1	0	0	0	0	0	0	0		Z(982)
Y(983)	0	0	0	0	0	0	1	0	0	0	0	0	0	0		Z(983)	0	0	0	0	0	0	497.31	0	0	0	0	0	0	0			Y(983)	0	0	0	0	1	0	1	0	0	0	0	0	0	0		Z(983)
Y(984)	0	0	0	0	0	0	4	0	0	0	0	0	0	0		Z(984)	0	0	0	0	0	0	498.79	0	0	0	0	0	0	0			Y(984)	0	0	0	0	1	0	1	0	0	0	0	0	0	0		Z(984)
Y(985)	0	0	0	0	0	0	4	0	0	0	0	0	0	0		Z(985)	0	0	0	0	0	0	505.79	0	0	0	0	0	0	0			Y(985)	0	0	0	0	1	0	1	0	0	0	0	0	0	0		Z(985)
Y(986)	0	0	0	0	0	0	1	0	0	0	0	0	0	0		Z(986)	0	0	0	0	0	0	506.96	0	0	0	0	0	0	0			Y(986)	0	0	0	0	1	0	1	0	0	0	0	0	0	0		Z(986)
Y(987)	0	0	0	0	0	0	1	0	0	0	0	0	0	0		Z(987)	0	0	0	0	0	0	507.09	0	0	0	0	0	0	0			Y(987)	0	0	0	0	3	0	1	0	0	0	0	0	0	0		Z(987)
Y(988)	0	0	0	0	0	0	1	0	0	0	0	0	0	0		Z(988)	0	0	0	0	0	0	507.21	0	0	0	0	0	0	0			Y(988)	0	0	0	0	4	0	1	0	0	0	0	0	0	0		Z(988)
Y(989)	0	0	0	0	0	0	1	0	0	0	0	0	0	0		Z(989)	0	0	0	0	0	0	507.44	0	0	0	0	0	0	0			Y(989)	0	0	0	0	1	0	1	0	0	0	0	0	0	0		Z(989)
Y(990)	0	0	0	0	0	0	4	0	0	0	0	0	0	0		Z(990)	0	0	0	0	0	0	508.79	0	0	0	0	0	0	0			Y(990)	0	0	0	0	1	0	4	0	0	0	0	0	0	0		Z(990)
Y(991)	0	0	0	0	0	0	1	0	0	0	0	0	0	0		Z(991)	0	0	0	0	0	0	509.59	0	0	0	0	0	0	0			Y(991)	0	0	0	0	1	0	1	0	0	0	0	0	0	0		Z(991)
Y(992)	0	0	0	0	0	0	1	0	0	0	0	0	0	0		Z(992)	0	0	0	0	0	0	509.71	0	0	0	0	0	0	0			Y(992)	0	0	0	0	1	0	1	0	0	0	0	0	0	0		Z(992)
Y(993)	0	0	0	0	0	0	1	0	0	0	0	0	0	0		Z(993)	0	0	0	0	0	0	510.01	0	0	0	0	0	0	0			Y(993)	0	0	0	0	1	0	1	0	0	0	0	0	0	0		Z(993)
Y(994)	0	0	0	0	0	0	1	0	0	0	0	0	0	0		Z(994)	0	0	0	0	0	0	510.14	0	0	0	0	0	0	0			Y(994)	0	0	0	0	1	0	1	0	0	0	0	0	0	0		Z(994)
Y(995)	0	0	0	0	0	0	1	0	0	0	0	0	0	0		Z(995)	0	0	0	0	0	0	510.55	0	0	0	0	0	0	0			Y(995)	0	0	0	0	4	0	1	0	0	0	0	0	0	0		Z(995)
Y(996)	0	0	0	0	0	0	1	0	0	0	0	0	0	0		Z(996)	0	0	0	0	0	0	510.89	0	0	0	0	0	0	0			Y(996)	0	0	0	0	1	0	1	0	0	0	0	0	0	0		Z(996)
Y(997)	0	0	0	0	0	0	4	0	0	0	0	0	0	0		Z(997)	0	0	0	0	0	0	511.79	0	0	0	0	0	0	0			Y(997)	0	0	0	0	4	0	1	0	0	0	0	0	0	0		Z(997)
Y(998)	0	0	0	0	0	0	1	0	0	0	0	0	0	0		Z(998)	0	0	0	0	0	0	512.59	0	0	0	0	0	0	0			Y(998)	0	0	0	0	4	0	1	0	0	0	0	0	0	0		Z(998)
Y(999)	0	0	0	0	0	0	1	0	0	0	0	0	0	0		Z(999)	0	0	0	0	0	0	512.82	0	0	0	0	0	0	0			Y(999)	0	0	0	0	1	0	1	0	0	0	0	0	0	0		Z(999)
Y(1000)	0	0	0	0	0	0	1	0	0	0	0	0	0	0		Z(1000)	0	0	0	0	0	0	513.28	0	0	0	0	0	0	0			Y(1000)	0	0	0	0	1	0	1	0	0	0	0	0	0	0		Z(1000)
Y(1001)	0	0	0	0	0	0	1	0	0	0	0	0	0	0		Z(1001)	0	0	0	0	0	0	513.58	0	0	0	0	0	0	0			Y(1001)	0	0	0	0	1	0	1	0	0	0	0	0	0	0		Z(1001)
Y(1002)	0	0	0	0	0	0	1	0	0	0	0	0	0	0		Z(1002)	0	0	0	0	0	0	513.74	0	0	0	0	0	0	0			Y(1002)	0	0	0	0	1	0	1	0	0	0	0	0	0	0		Z(1002)
Y(1003)	0	0	0	0	0	0	4	0	0	0	0	0	0	0		Z(1003)	0	0	0	0	0	0	514.59	0	0	0	0	0	0	0			Y(1003)	0	0	0	0	1	0	1	0	0	0	0	0	0	0		Z(1003)
Y(1004)	0	0	0	0	0	0	1	0	0	0	0	0	0	0		Z(1004)	0	0	0	0	0	0	515.45	0	0	0	0	0	0	0			Y(1004)	0	0	0	0	1	0	1	0	0	0	0	0	0	0		Z(1004)
Y(1005)	0	0	0	0	0	0	1	0	0	0	0	0	0	0		Z(1005)	0	0	0	0	0	0	515.58	0	0	0	0	0	0	0			Y(1005)	0	0	0	0	1	0	1	0	0	0	0	0	0	0		Z(1005)
Y(1006)	0	0	0	0	0	0	1	0	0	0	0	0	0	0		Z(1006)	0	0	0	0	0	0	516.06	0	0	0	0	0	0	0			Y(1006)	0	0	0	0	1	0	1	0	0	0	0	0	0	0		Z(1006)
Y(1007)	0	0	0	0	0	0	1	0	0	0	0	0	0	0		Z(1007)	0	0	0	0	0	0	516.2	0	0	0	0	0	0	0			Y(1007)	0	0	0	0	4	0	1	0	0	0	0	0	0	0		Z(1007)
Y(1008)	0	0	0	0	0	0	1	0	0	0	0	0	0	0		Z(1008)	0	0	0	0	0	0	516.4	0	0	0	0	0	0	0			Y(1008)	0	0	0	0	1	0	4	0	0	0	0	0	0	0		Z(1008)
Y(1009)	0	0	0	0	0	0	1	0	0	0	0	0	0	0		Z(1009)	0	0	0	0	0	0	516.48	0	0	0	0	0	0	0			Y(1009)	0	0	0	0	1	0	1	0	0	0	0	0	0	0		Z(1009)
Y(1010)	0	0	0	0	0	0	1	0	0	0	0	0	0	0		Z(1010)	0	0	0	0	0	0	516.57	0	0	0	0	0	0	0			Y(1010)	0	0	0	0	1	0	1	0	0	0	0	0	0	0		Z(1010)
Y(1011)	0	0	0	0	0	0	3	0	0	0	0	0	0	0		Z(1011)	0	0	0	0	0	0	516.68	0	0	0	0	0	0	0			Y(1011)	0	0	0	0	1	0	1	0	0	0	0	0	0	0		Z(1011)
Y(1012)	0	0	0	0	0	0	0	0	0	0	0	0	0	0		Z(1012)	0	0	0	0	0	0	0	0	0	0	0	0	0	0			Y(1012)	0	0	0	0	4	0	1	0	0	0	0	0	0	0		Z(1012)
Y(1013)	0	0	0	0	0	0	0	0	0	0	0	0	0	0		Z(1013)	0	0	0	0	0	0	0	0	0	0	0	0	0	0			Y(1013)	0	0	0	0	4	0	1	0	0	0	0	0	0	0		Z(1013)
Y(1014)	0	0	0	0	0	0	0	0	0	0	0	0	0	0		Z(1014)	0	0	0	0	0	0	0	0	0	0	0	0	0	0			Y(1014)	0	0	0	0	1	0	1	0	0	0	0	0	0	0		Z(1014)
Y(1015)	0	0	0	0	0	0	0	0	0	0	0	0	0	0		Z(1015)	0	0	0	0	0	0	0	0	0	0	0	0	0	0			Y(1015)	0	0	0	0	1	0	1	0	0	0	0	0	0	0		Z(1015)
Y(1016)	0	0	0	0	0	0	0	0	0	0	0	0	0	0		Z(1016)	0	0	0	0	0	0	0	0	0	0	0	0	0	0			Y(1016)	0	0	0	0	1	0	4	0	0	0	0	0	0	0		Z(1016)
Y(1017)	0	0	0	0	0	0	0	0	0	0	0	0	0	0		Z(1017)	0	0	0	0	0	0	0	0	0	0	0	0	0	0			Y(1017)	0	0	0	0	1	0	1	0	0	0	0	0	0	0		Z(1017)
Y(1018)	0	0	0	0	0	0	0	0	0	0	0	0	0	0		Z(1018)	0	0	0	0	0	0	0	0	0	0	0	0	0	0			Y(1018)	0	0	0	0	1	0	1	0	0	0	0	0	0	0		Z(1018)
Y(1019)	0	0	0	0	0	0	0	0	0	0	0	0	0	0		Z(1019)	0	0	0	0	0	0	0	0	0	0	0	0	0	0			Y(1019)	0	0	0	0	1	0	1	0	0	0	0	0	0	0		Z(1019)
Y(1020)	0	0	0	0	0	0	0	0	0	0	0	0	0	0		Z(1020)	0	0	0	0	0	0	0	0	0	0	0	0	0	0			Y(1020)	0	0	0	0	4	0	1	0	0	0	0	0	0	0		Z(1020)
Y(1021)	0	0	0	0	0	0	0	0	0	0	0	0	0	0		Z(1021)	0	0	0	0	0	0	0	0	0	0	0	0	0	0			Y(1021)	0	0	0	0	1	0	1	0	0	0	0	0	0	0		Z(1021)
Y(1022)	0	0	0	0	0	0	0	0	0	0	0	0	0	0		Z(1022)	0	0	0	0	0	0	0	0	0	0	0	0	0	0			Y(1022)	0	0	0	0	1	0	1	0	0	0	0	0	0	0		Z(1022)
Y(1023)	0	0	0	0	0	0	0	0	0	0	0	0	0	0		Z(1023)	0	0	0	0	0	0	0	0	0	0	0	0	0	0			Y(1023)	0	0	0	0	1	0	1	0	0	0	0	0	0	0		Z(1023)
Y(1024)	0	0	0	0	0	0	0	0	0	0	0	0	0	0		Z(1024)	0	0	0	0	0	0	0	0	0	0	0	0	0	0			Y(1024)	0	0	0	0	4	0	4	0	0	0	0	0	0	0		Z(1024)
Y(1025)	0	0	0	0	0	0	0	0	0	0	0	0	0	0		Z(1025)	0	0	0	0	0	0	0	0	0	0	0	0	0	0			Y(1025)	0	0	0	0	4	0	1	0	0	0	0	0	0	0		Z(1025)
Y(1026)	0	0	0	0	0	0	0	0	0	0	0	0	0	0		Z(1026)	0	0	0	0	0	0	0	0	0	0	0	0	0	0			Y(1026)	0	0	0	0	1	0	1	0	0	0	0	0	0	0		Z(1026)
Y(1027)	0	0	0	0	0	0	0	0	0	0	0	0	0	0		Z(1027)	0	0	0	0	0	0	0	0	0	0	0	0	0	0			Y(1027)	0	0	0	0	1	0	1	0	0	0	0	0	0	0		Z(1027)
Y(1028)	0	0	0	0	0	0	0	0	0	0	0	0	0	0		Z(1028)	0	0	0	0	0	0	0	0	0	0	0	0	0	0			Y(1028)	0	0	0	0	1	0	1	0	0	0	0	0	0	0		Z(1028)
Y(1029)	0	0	0	0	0	0	0	0	0	0	0	0	0	0		Z(1029)	0	0	0	0	0	0	0	0	0	0	0	0	0	0			Y(1029)	0	0	0	0	1	0	1	0	0	0	0	0	0	0		Z(1029)
Y(1030)	0	0	0	0	0	0	0	0	0	0	0	0	0	0		Z(1030)	0	0	0	0	0	0	0	0	0	0	0	0	0	0			Y(1030)	0	0	0	0	1	0	1	0	0	0	0	0	0	0		Z(1030)
Y(1031)	0	0	0	0	0	0	0	0	0	0	0	0	0	0		Z(1031)	0	0	0	0	0	0	0	0	0	0	0	0	0	0			Y(1031)	0	0	0	0	1	0	1	0	0	0	0	0	0	0		Z(1031)
Y(1032)	0	0	0	0	0	0	0	0	0	0	0	0	0	0		Z(1032)	0	0	0	0	0	0	0	0	0	0	0	0	0	0			Y(1032)	0	0	0	0	1	0	1	0	0	0	0	0	0	0		Z(1032)
Y(1033)	0	0	0	0	0	0	0	0	0	0	0	0	0	0		Z(1033)	0	0	0	0	0	0	0	0	0	0	0	0	0	0			Y(1033)	0	0	0	0	1	0	1	0	0	0	0	0	0	0		Z(1033)
Y(1034)	0	0	0	0	0	0	0	0	0	0	0	0	0	0		Z(1034)	0	0	0	0	0	0	0	0	0	0	0	0	0	0			Y(1034)	0	0	0	0	4	0	1	0	0	0	0	0	0	0		Z(1034)
Y(1035)	0	0	0	0	0	0	0	0	0	0	0	0	0	0		Z(1035)	0	0	0	0	0	0	0	0	0	0	0	0	0	0			Y(1035)	0	0	0	0	1	0	1	0	0	0	0	0	0	0		Z(1035)
Y(1036)	0	0	0	0	0	0	0	0	0	0	0	0	0	0		Z(1036)	0	0	0	0	0	0	0	0	0	0	0	0	0	0			Y(1036)	0	0	0	0	1	0	1	0	0	0	0	0	0	0		Z(1036)
Y(1037)	0	0	0	0	0	0	0	0	0	0	0	0	0	0		Z(1037)	0	0	0	0	0	0	0	0	0	0	0	0	0	0			Y(1037)	0	0	0	0	1	0	4	0	0	0	0	0	0	0		Z(1037)
Y(1038)	0	0	0	0	0	0	0	0	0	0	0	0	0	0		Z(1038)	0	0	0	0	0	0	0	0	0	0	0	0	0	0			Y(1038)	0	0	0	0	1	0	4	0	0	0	0	0	0	0		Z(1038)
Y(1039)	0	0	0	0	0	0	0	0	0	0	0	0	0	0		Z(1039)	0	0	0	0	0	0	0	0	0	0	0	0	0	0			Y(1039)	0	0	0	0	1	0	1	0	0	0	0	0	0	0		Z(1039)
Y(1040)	0	0	0	0	0	0	0	0	0	0	0	0	0	0		Z(1040)	0	0	0	0	0	0	0	0	0	0	0	0	0	0			Y(1040)	0	0	0	0	4	0	1	0	0	0	0	0	0	0		Z(1040)
Y(1041)	0	0	0	0	0	0	0	0	0	0	0	0	0	0		Z(1041)	0	0	0	0	0	0	0	0	0	0	0	0	0	0			Y(1041)	0	0	0	0	1	0	1	0	0	0	0	0	0	0		Z(1041)
Y(1042)	0	0	0	0	0	0	0	0	0	0	0	0	0	0		Z(1042)	0	0	0	0	0	0	0	0	0	0	0	0	0	0			Y(1042)	0	0	0	0	1	0	1	0	0	0	0	0	0	0		Z(1042)
Y(1043)	0	0	0	0	0	0	0	0	0	0	0	0	0	0		Z(1043)	0	0	0	0	0	0	0	0	0	0	0	0	0	0			Y(1043)	0	0	0	0	1	0	1	0	0	0	0	0	0	0		Z(1043)
Y(1044)	0	0	0	0	0	0	0	0	0	0	0	0	0	0		Z(1044)	0	0	0	0	0	0	0	0	0	0	0	0	0	0			Y(1044)	0	0	0	0	1	0	1	0	0	0	0	0	0	0		Z(1044)
Y(1045)	0	0	0	0	0	0	0	0	0	0	0	0	0	0		Z(1045)	0	0	0	0	0	0	0	0	0	0	0	0	0	0			Y(1045)	0	0	0	0	1	0	1	0	0	0	0	0	0	0		Z(1045)
Y(1046)	0	0	0	0	0	0	0	0	0	0	0	0	0	0		Z(1046)	0	0	0	0	0	0	0	0	0	0	0	0	0	0			Y(1046)	0	0	0	0	1	0	1	0	0	0	0	0	0	0		Z(1046)
Y(1047)	0	0	0	0	0	0	0	0	0	0	0	0	0	0		Z(1047)	0	0	0	0	0	0	0	0	0	0	0	0	0	0			Y(1047)	0	0	0	0	1	0	1	0	0	0	0	0	0	0		Z(1047)
Y(1048)	0	0	0	0	0	0	0	0	0	0	0	0	0	0		Z(1048)	0	0	0	0	0	0	0	0	0	0	0	0	0	0			Y(1048)	0	0	0	0	4	0	1	0	0	0	0	0	0	0		Z(1048)
Y(1049)	0	0	0	0	0	0	0	0	0	0	0	0	0	0		Z(1049)	0	0	0	0	0	0	0	0	0	0	0	0	0	0			Y(1049)	0	0	0	0	1	0	1	0	0	0	0	0	0	0		Z(1049)
Y(1050)	0	0	0	0	0	0	0	0	0	0	0	0	0	0		Z(1050)	0	0	0	0	0	0	0	0	0	0	0	0	0	0			Y(1050)	0	0	0	0	1	0	3	0	0	0	0	0	0	0		Z(1050)
Y(1051)	0	0	0	0	0	0	0	0	0	0	0	0	0	0		Z(1051)	0	0	0	0	0	0	0	0	0	0	0	0	0	0			Y(1051)	0	0	0	0	1	0	1	0	0	0	0	0	0	0		Z(1051)
Y(1052)	0	0	0	0	0	0	0	0	0	0	0	0	0	0		Z(1052)	0	0	0	0	0	0	0	0	0	0	0	0	0	0			Y(1052)	0	0	0	0	1	0	4	0	0	0	0	0	0	0		Z(1052)
Y(1053)	0	0	0	0	0	0	0	0	0	0	0	0	0	0		Z(1053)	0	0	0	0	0	0	0	0	0	0	0	0	0	0			Y(1053)	0	0	0	0	1	0	4	0	0	0	0	0	0	0		Z(1053)
Y(1054)	0	0	0	0	0	0	0	0	0	0	0	0	0	0		Z(1054)	0	0	0	0	0	0	0	0	0	0	0	0	0	0			Y(1054)	0	0	0	0	1	0	1	0	0	0	0	0	0	0		Z(1054)
Y(1055)	0	0	0	0	0	0	0	0	0	0	0	0	0	0		Z(1055)	0	0	0	0	0	0	0	0	0	0	0	0	0	0			Y(1055)	0	0	0	0	1	0	1	0	0	0	0	0	0	0		Z(1055)
Y(1056)	0	0	0	0	0	0	0	0	0	0	0	0	0	0		Z(1056)	0	0	0	0	0	0	0	0	0	0	0	0	0	0			Y(1056)	0	0	0	0	1	0	1	0	0	0	0	0	0	0		Z(1056)
Y(1057)	0	0	0	0	0	0	0	0	0	0	0	0	0	0		Z(1057)	0	0	0	0	0	0	0	0	0	0	0	0	0	0			Y(1057)	0	0	0	0	1	0	1	0	0	0	0	0	0	0		Z(1057)
Y(1058)	0	0	0	0	0	0	0	0	0	0	0	0	0	0		Z(1058)	0	0	0	0	0	0	0	0	0	0	0	0	0	0			Y(1058)	0	0	0	0	1	0	1	0	0	0	0	0	0	0		Z(1058)
Y(1059)	0	0	0	0	0	0	0	0	0	0	0	0	0	0		Z(1059)	0	0	0	0	0	0	0	0	0	0	0	0	0	0			Y(1059)	0	0	0	0	4	0	1	0	0	0	0	0	0	0		Z(1059)
Y(1060)	0	0	0	0	0	0	0	0	0	0	0	0	0	0		Z(1060)	0	0	0	0	0	0	0	0	0	0	0	0	0	0			Y(1060)	0	0	0	0	1	0	1	0	0	0	0	0	0	0		Z(1060)
Y(1061)	0	0	0	0	0	0	0	0	0	0	0	0	0	0		Z(1061)	0	0	0	0	0	0	0	0	0	0	0	0	0	0			Y(1061)	0	0	0	0	1	0	1	0	0	0	0	0	0	0		Z(1061)
Y(1062)	0	0	0	0	0	0	0	0	0	0	0	0	0	0		Z(1062)	0	0	0	0	0	0	0	0	0	0	0	0	0	0			Y(1062)	0	0	0	0	1	0	1	0	0	0	0	0	0	0		Z(1062)
Y(1063)	0	0	0	0	0	0	0	0	0	0	0	0	0	0		Z(1063)	0	0	0	0	0	0	0	0	0	0	0	0	0	0			Y(1063)	0	0	0	0	1	0	1	0	0	0	0	0	0	0		Z(1063)
Y(1064)	0	0	0	0	0	0	0	0	0	0	0	0	0	0		Z(1064)	0	0	0	0	0	0	0	0	0	0	0	0	0	0			Y(1064)	0	0	0	0	1	0	1	0	0	0	0	0	0	0		Z(1064)
Y(1065)	0	0	0	0	0	0	0	0	0	0	0	0	0	0		Z(1065)	0	0	0	0	0	0	0	0	0	0	0	0	0	0			Y(1065)	0	0	0	0	4	0	1	0	0	0	0	0	0	0		Z(1065)
Y(1066)	0	0	0	0	0	0	0	0	0	0	0	0	0	0		Z(1066)	0	0	0	0	0	0	0	0	0	0	0	0	0	0			Y(1066)	0	0	0	0	1	0	1	0	0	0	0	0	0	0		Z(1066)
Y(1067)	0	0	0	0	0	0	0	0	0	0	0	0	0	0		Z(1067)	0	0	0	0	0	0	0	0	0	0	0	0	0	0			Y(1067)	0	0	0	0	1	0	1	0	0	0	0	0	0	0		Z(1067)
Y(1068)	0	0	0	0	0	0	0	0	0	0	0	0	0	0		Z(1068)	0	0	0	0	0	0	0	0	0	0	0	0	0	0			Y(1068)	0	0	0	0	1	0	1	0	0	0	0	0	0	0		Z(1068)
Y(1069)	0	0	0	0	0	0	0	0	0	0	0	0	0	0		Z(1069)	0	0	0	0	0	0	0	0	0	0	0	0	0	0			Y(1069)	0	0	0	0	1	0	4	0	0	0	0	0	0	0		Z(1069)
Y(1070)	0	0	0	0	0	0	0	0	0	0	0	0	0	0		Z(1070)	0	0	0	0	0	0	0	0	0	0	0	0	0	0			Y(1070)	0	0	0	0	1	0	1	0	0	0	0	0	0	0		Z(1070)
Y(1071)	0	0	0	0	0	0	0	0	0	0	0	0	0	0		Z(1071)	0	0	0	0	0	0	0	0	0	0	0	0	0	0			Y(1071)	0	0	0	0	1	0	1	0	0	0	0	0	0	0		Z(1071)
Y(1072)	0	0	0	0	0	0	0	0	0	0	0	0	0	0		Z(1072)	0	0	0	0	0	0	0	0	0	0	0	0	0	0			Y(1072)	0	0	0	0	1	0	1	0	0	0	0	0	0	0		Z(1072)
Y(1073)	0	0	0	0	0	0	0	0	0	0	0	0	0	0		Z(1073)	0	0	0	0	0	0	0	0	0	0	0	0	0	0			Y(1073)	0	0	0	0	1	0	1	0	0	0	0	0	0	0		Z(1073)
Y(1074)	0	0	0	0	0	0	0	0	0	0	0	0	0	0		Z(1074)	0	0	0	0	0	0	0	0	0	0	0	0	0	0			Y(1074)	0	0	0	0	4	0	1	0	0	0	0	0	0	0		Z(1074)
Y(1075)	0	0	0	0	0	0	0	0	0	0	0	0	0	0		Z(1075)	0	0	0	0	0	0	0	0	0	0	0	0	0	0			Y(1075)	0	0	0	0	1	0	1	0	0	0	0	0	0	0		Z(1075)
Y(1076)	0	0	0	0	0	0	0	0	0	0	0	0	0	0		Z(1076)	0	0	0	0	0	0	0	0	0	0	0	0	0	0			Y(1076)	0	0	0	0	1	0	4	0	0	0	0	0	0	0		Z(1076)
Y(1077)	0	0	0	0	0	0	0	0	0	0	0	0	0	0		Z(1077)	0	0	0	0	0	0	0	0	0	0	0	0	0	0			Y(1077)	0	0	0	0	1	0	1	0	0	0	0	0	0	0		Z(1077)
Y(1078)	0	0	0	0	0	0	0	0	0	0	0	0	0	0		Z(1078)	0	0	0	0	0	0	0	0	0	0	0	0	0	0			Y(1078)	0	0	0	0	1	0	1	0	0	0	0	0	0	0		Z(1078)
Y(1079)	0	0	0	0	0	0	0	0	0	0	0	0	0	0		Z(1079)	0	0	0	0	0	0	0	0	0	0	0	0	0	0			Y(1079)	0	0	0	0	1	0	1	0	0	0	0	0	0	0		Z(1079)
Y(1080)	0	0	0	0	0	0	0	0	0	0	0	0	0	0		Z(1080)	0	0	0	0	0	0	0	0	0	0	0	0	0	0			Y(1080)	0	0	0	0	1	0	1	0	0	0	0	0	0	0		Z(1080)
Y(1081)	0	0	0	0	0	0	0	0	0	0	0	0	0	0		Z(1081)	0	0	0	0	0	0	0	0	0	0	0	0	0	0			Y(1081)	0	0	0	0	1	0	1	0	0	0	0	0	0	0		Z(1081)
Y(1082)	0	0	0	0	0	0	0	0	0	0	0	0	0	0		Z(1082)	0	0	0	0	0	0	0	0	0	0	0	0	0	0			Y(1082)	0	0	0	0	1	0	1	0	0	0	0	0	0	0		Z(1082)
Y(1083)	0	0	0	0	0	0	0	0	0	0	0	0	0	0		Z(1083)	0	0	0	0	0	0	0	0	0	0	0	0	0	0			Y(1083)	0	0	0	0	4	0	1	0	0	0	0	0	0	0		Z(1083)
Y(1084)	0	0	0	0	0	0	0	0	0	0	0	0	0	0		Z(1084)	0	0	0	0	0	0	0	0	0	0	0	0	0	0			Y(1084)	0	0	0	0	1	0	4	0	0	0	0	0	0	0		Z(1084)
Y(1085)	0	0	0	0	0	0	0	0	0	0	0	0	0	0		Z(1085)	0	0	0	0	0	0	0	0	0	0	0	0	0	0			Y(1085)	0	0	0	0	1	0	1	0	0	0	0	0	0	0		Z(1085)
Y(1086)	0	0	0	0	0	0	0	0	0	0	0	0	0	0		Z(1086)	0	0	0	0	0	0	0	0	0	0	0	0	0	0			Y(1086)	0	0	0	0	1	0	1	0	0	0	0	0	0	0		Z(1086)
Y(1087)	0	0	0	0	0	0	0	0	0	0	0	0	0	0		Z(1087)	0	0	0	0	0	0	0	0	0	0	0	0	0	0			Y(1087)	0	0	0	0	1	0	1	0	0	0	0	0	0	0		Z(1087)
Y(1088)	0	0	0	0	0	0	0	0	0	0	0	0	0	0		Z(1088)	0	0	0	0	0	0	0	0	0	0	0	0	0	0			Y(1088)	0	0	0	0	1	0	1	0	0	0	0	0	0	0		Z(1088)
Y(1089)	0	0	0	0	0	0	0	0	0	0	0	0	0	0		Z(1089)	0	0	0	0	0	0	0	0	0	0	0	0	0	0			Y(1089)	0	0	0	0	1	0	1	0	0	0	0	0	0	0		Z(1089)
Y(1090)	0	0	0	0	0	0	0	0	0	0	0	0	0	0		Z(1090)	0	0	0	0	0	0	0	0	0	0	0	0	0	0			Y(1090)	0	0	0	0	1	0	1	0	0	0	0	0	0	0		Z(1090)
Y(1091)	0	0	0	0	0	0	0	0	0	0	0	0	0	0		Z(1091)	0	0	0	0	0	0	0	0	0	0	0	0	0	0			Y(1091)	0	0	0	0	3	0	1	0	0	0	0	0	0	0		Z(1091)
Y(1092)	0	0	0	0	0	0	0	0	0	0	0	0	0	0		Z(1092)	0	0	0	0	0	0	0	0	0	0	0	0	0	0			Y(1092)	0	0	0	0	1	0	3	0	0	0	0	0	0	0		Z(1092)
Y(1093)	0	0	0	0	0	0	0	0	0	0	0	0	0	0		Z(1093)	0	0	0	0	0	0	0	0	0	0	0	0	0	0			Y(1093)	0	0	0	0	1	0	1	0	0	0	0	0	0	0		Z(1093)
Y(1094)	0	0	0	0	0	0	0	0	0	0	0	0	0	0		Z(1094)	0	0	0	0	0	0	0	0	0	0	0	0	0	0			Y(1094)	0	0	0	0	4	0	1	0	0	0	0	0	0	0		Z(1094)
Y(1095)	0	0	0	0	0	0	0	0	0	0	0	0	0	0		Z(1095)	0	0	0	0	0	0	0	0	0	0	0	0	0	0			Y(1095)	0	0	0	0	1	0	4	0	0	0	0	0	0	0		Z(1095)
Y(1096)	0	0	0	0	0	0	0	0	0	0	0	0	0	0		Z(1096)	0	0	0	0	0	0	0	0	0	0	0	0	0	0			Y(1096)	0	0	0	0	1	0	4	0	0	0	0	0	0	0		Z(1096)
Y(1097)	0	0	0	0	0	0	0	0	0	0	0	0	0	0		Z(1097)	0	0	0	0	0	0	0	0	0	0	0	0	0	0			Y(1097)	0	0	0	0	1	0	4	0	0	0	0	0	0	0		Z(1097)
Y(1098)	0	0	0	0	0	0	0	0	0	0	0	0	0	0		Z(1098)	0	0	0	0	0	0	0	0	0	0	0	0	0	0			Y(1098)	0	0	0	0	1	0	1	0	0	0	0	0	0	0		Z(1098)
Y(1099)	0	0	0	0	0	0	0	0	0	0	0	0	0	0		Z(1099)	0	0	0	0	0	0	0	0	0	0	0	0	0	0			Y(1099)	0	0	0	0	1	0	1	0	0	0	0	0	0	0		Z(1099)
Y(1100)	0	0	0	0	0	0	0	0	0	0	0	0	0	0		Z(1100)	0	0	0	0	0	0	0	0	0	0	0	0	0	0			Y(1100)	0	0	0	0	1	0	1	0	0	0	0	0	0	0		Z(1100)
Y(1101)	0	0	0	0	0	0	0	0	0	0	0	0	0	0		Z(1101)	0	0	0	0	0	0	0	0	0	0	0	0	0	0			Y(1101)	0	0	0	0	4	0	1	0	0	0	0	0	0	0		Z(1101)
Y(1102)	0	0	0	0	0	0	0	0	0	0	0	0	0	0		Z(1102)	0	0	0	0	0	0	0	0	0	0	0	0	0	0			Y(1102)	0	0	0	0	1	0	1	0	0	0	0	0	0	0		Z(1102)
Y(1103)	0	0	0	0	0	0	0	0	0	0	0	0	0	0		Z(1103)	0	0	0	0	0	0	0	0	0	0	0	0	0	0			Y(1103)	0	0	0	0	1	0	1	0	0	0	0	0	0	0		Z(1103)
Y(1104)	0	0	0	0	0	0	0	0	0	0	0	0	0	0		Z(1104)	0	0	0	0	0	0	0	0	0	0	0	0	0	0			Y(1104)	0	0	0	0	1	0	1	0	0	0	0	0	0	0		Z(1104)
Y(1105)	0	0	0	0	0	0	0	0	0	0	0	0	0	0		Z(1105)	0	0	0	0	0	0	0	0	0	0	0	0	0	0			Y(1105)	0	0	0	0	1	0	1	0	0	0	0	0	0	0		Z(1105)
Y(1106)	0	0	0	0	0	0	0	0	0	0	0	0	0	0		Z(1106)	0	0	0	0	0	0	0	0	0	0	0	0	0	0			Y(1106)	0	0	0	0	1	0	4	0	0	0	0	0	0	0		Z(1106)
Y(1107)	0	0	0	0	0	0	0	0	0	0	0	0	0	0		Z(1107)	0	0	0	0	0	0	0	0	0	0	0	0	0	0			Y(1107)	0	0	0	0	1	0	1	0	0	0	0	0	0	0		Z(1107)
Y(1108)	0	0	0	0	0	0	0	0	0	0	0	0	0	0		Z(1108)	0	0	0	0	0	0	0	0	0	0	0	0	0	0			Y(1108)	0	0	0	0	1	0	1	0	0	0	0	0	0	0		Z(1108)
Y(1109)	0	0	0	0	0	0	0	0	0	0	0	0	0	0		Z(1109)	0	0	0	0	0	0	0	0	0	0	0	0	0	0			Y(1109)	0	0	0	0	1	0	1	0	0	0	0	0	0	0		Z(1109)
Y(1110)	0	0	0	0	0	0	0	0	0	0	0	0	0	0		Z(1110)	0	0	0	0	0	0	0	0	0	0	0	0	0	0			Y(1110)	0	0	0	0	1	0	1	0	0	0	0	0	0	0		Z(1110)
Y(1111)	0	0	0	0	0	0	0	0	0	0	0	0	0	0		Z(1111)	0	0	0	0	0	0	0	0	0	0	0	0	0	0			Y(1111)	0	0	0	0	1	0	1	0	0	0	0	0	0	0		Z(1111)
Y(1112)	0	0	0	0	0	0	0	0	0	0	0	0	0	0		Z(1112)	0	0	0	0	0	0	0	0	0	0	0	0	0	0			Y(1112)	0	0	0	0	1	0	1	0	0	0	0	0	0	0		Z(1112)
Y(1113)	0	0	0	0	0	0	0	0	0	0	0	0	0	0		Z(1113)	0	0	0	0	0	0	0	0	0	0	0	0	0	0			Y(1113)	0	0	0	0	4	0	1	0	0	0	0	0	0	0		Z(1113)
Y(1114)	0	0	0	0	0	0	0	0	0	0	0	0	0	0		Z(1114)	0	0	0	0	0	0	0	0	0	0	0	0	0	0			Y(1114)	0	0	0	0	1	0	1	0	0	0	0	0	0	0		Z(1114)
Y(1115)	0	0	0	0	0	0	0	0	0	0	0	0	0	0		Z(1115)	0	0	0	0	0	0	0	0	0	0	0	0	0	0			Y(1115)	0	0	0	0	1	0	1	0	0	0	0	0	0	0		Z(1115)
Y(1116)	0	0	0	0	0	0	0	0	0	0	0	0	0	0		Z(1116)	0	0	0	0	0	0	0	0	0	0	0	0	0	0			Y(1116)	0	0	0	0	1	0	1	0	0	0	0	0	0	0		Z(1116)
Y(1117)	0	0	0	0	0	0	0	0	0	0	0	0	0	0		Z(1117)	0	0	0	0	0	0	0	0	0	0	0	0	0	0			Y(1117)	0	0	0	0	1	0	1	0	0	0	0	0	0	0		Z(1117)
Y(1118)	0	0	0	0	0	0	0	0	0	0	0	0	0	0		Z(1118)	0	0	0	0	0	0	0	0	0	0	0	0	0	0			Y(1118)	0	0	0	0	1	0	1	0	0	0	0	0	0	0		Z(1118)
Y(1119)	0	0	0	0	0	0	0	0	0	0	0	0	0	0		Z(1119)	0	0	0	0	0	0	0	0	0	0	0	0	0	0			Y(1119)	0	0	0	0	1	0	1	0	0	0	0	0	0	0		Z(1119)
Y(1120)	0	0	0	0	0	0	0	0	0	0	0	0	0	0		Z(1120)	0	0	0	0	0	0	0	0	0	0	0	0	0	0			Y(1120)	0	0	0	0	1	0	1	0	0	0	0	0	0	0		Z(1120)
Y(1121)	0	0	0	0	0	0	0	0	0	0	0	0	0	0		Z(1121)	0	0	0	0	0	0	0	0	0	0	0	0	0	0			Y(1121)	0	0	0	0	1	0	1	0	0	0	0	0	0	0		Z(1121)
Y(1122)	0	0	0	0	0	0	0	0	0	0	0	0	0	0		Z(1122)	0	0	0	0	0	0	0	0	0	0	0	0	0	0			Y(1122)	0	0	0	0	1	0	1	0	0	0	0	0	0	0		Z(1122)
Y(1123)	0	0	0	0	0	0	0	0	0	0	0	0	0	0		Z(1123)	0	0	0	0	0	0	0	0	0	0	0	0	0	0			Y(1123)	0	0	0	0	1	0	1	0	0	0	0	0	0	0		Z(1123)
Y(1124)	0	0	0	0	0	0	0	0	0	0	0	0	0	0		Z(1124)	0	0	0	0	0	0	0	0	0	0	0	0	0	0			Y(1124)	0	0	0	0	1	0	4	0	0	0	0	0	0	0		Z(1124)
Y(1125)	0	0	0	0	0	0	0	0	0	0	0	0	0	0		Z(1125)	0	0	0	0	0	0	0	0	0	0	0	0	0	0			Y(1125)	0	0	0	0	1	0	1	0	0	0	0	0	0	0		Z(1125)
Y(1126)	0	0	0	0	0	0	0	0	0	0	0	0	0	0		Z(1126)	0	0	0	0	0	0	0	0	0	0	0	0	0	0			Y(1126)	0	0	0	0	1	0	1	0	0	0	0	0	0	0		Z(1126)
Y(1127)	0	0	0	0	0	0	0	0	0	0	0	0	0	0		Z(1127)	0	0	0	0	0	0	0	0	0	0	0	0	0	0			Y(1127)	0	0	0	0	1	0	1	0	0	0	0	0	0	0		Z(1127)
Y(1128)	0	0	0	0	0	0	0	0	0	0	0	0	0	0		Z(1128)	0	0	0	0	0	0	0	0	0	0	0	0	0	0			Y(1128)	0	0	0	0	1	0	1	0	0	0	0	0	0	0		Z(1128)
Y(1129)	0	0	0	0	0	0	0	0	0	0	0	0	0	0		Z(1129)	0	0	0	0	0	0	0	0	0	0	0	0	0	0			Y(1129)	0	0	0	0	1	0	1	0	0	0	0	0	0	0		Z(1129)
Y(1130)	0	0	0	0	0	0	0	0	0	0	0	0	0	0		Z(1130)	0	0	0	0	0	0	0	0	0	0	0	0	0	0			Y(1130)	0	0	0	0	1	0	1	0	0	0	0	0	0	0		Z(1130)
Y(1131)	0	0	0	0	0	0	0	0	0	0	0	0	0	0		Z(1131)	0	0	0	0	0	0	0	0	0	0	0	0	0	0			Y(1131)	0	0	0	0	1	0	1	0	0	0	0	0	0	0		Z(1131)
Y(1132)	0	0	0	0	0	0	0	0	0	0	0	0	0	0		Z(1132)	0	0	0	0	0	0	0	0	0	0	0	0	0	0			Y(1132)	0	0	0	0	1	0	1	0	0	0	0	0	0	0		Z(1132)
Y(1133)	0	0	0	0	0	0	0	0	0	0	0	0	0	0		Z(1133)	0	0	0	0	0	0	0	0	0	0	0	0	0	0			Y(1133)	0	0	0	0	4	0	1	0	0	0	0	0	0	0		Z(1133)
Y(1134)	0	0	0	0	0	0	0	0	0	0	0	0	0	0		Z(1134)	0	0	0	0	0	0	0	0	0	0	0	0	0	0			Y(1134)	0	0	0	0	1	0	1	0	0	0	0	0	0	0		Z(1134)
Y(1135)	0	0	0	0	0	0	0	0	0	0	0	0	0	0		Z(1135)	0	0	0	0	0	0	0	0	0	0	0	0	0	0			Y(1135)	0	0	0	0	1	0	1	0	0	0	0	0	0	0		Z(1135)
Y(1136)	0	0	0	0	0	0	0	0	0	0	0	0	0	0		Z(1136)	0	0	0	0	0	0	0	0	0	0	0	0	0	0			Y(1136)	0	0	0	0	1	0	1	0	0	0	0	0	0	0		Z(1136)
Y(1137)	0	0	0	0	0	0	0	0	0	0	0	0	0	0		Z(1137)	0	0	0	0	0	0	0	0	0	0	0	0	0	0			Y(1137)	0	0	0	0	1	0	4	0	0	0	0	0	0	0		Z(1137)
Y(1138)	0	0	0	0	0	0	0	0	0	0	0	0	0	0		Z(1138)	0	0	0	0	0	0	0	0	0	0	0	0	0	0			Y(1138)	0	0	0	0	1	0	1	0	0	0	0	0	0	0		Z(1138)
Y(1139)	0	0	0	0	0	0	0	0	0	0	0	0	0	0		Z(1139)	0	0	0	0	0	0	0	0	0	0	0	0	0	0			Y(1139)	0	0	0	0	1	0	1	0	0	0	0	0	0	0		Z(1139)
Y(1140)	0	0	0	0	0	0	0	0	0	0	0	0	0	0		Z(1140)	0	0	0	0	0	0	0	0	0	0	0	0	0	0			Y(1140)	0	0	0	0	4	0	1	0	0	0	0	0	0	0		Z(1140)
Y(1141)	0	0	0	0	0	0	0	0	0	0	0	0	0	0		Z(1141)	0	0	0	0	0	0	0	0	0	0	0	0	0	0			Y(1141)	0	0	0	0	1	0	1	0	0	0	0	0	0	0		Z(1141)
Y(1142)	0	0	0	0	0	0	0	0	0	0	0	0	0	0		Z(1142)	0	0	0	0	0	0	0	0	0	0	0	0	0	0			Y(1142)	0	0	0	0	1	0	1	0	0	0	0	0	0	0		Z(1142)
Y(1143)	0	0	0	0	0	0	0	0	0	0	0	0	0	0		Z(1143)	0	0	0	0	0	0	0	0	0	0	0	0	0	0			Y(1143)	0	0	0	0	1	0	4	0	0	0	0	0	0	0		Z(1143)
Y(1144)	0	0	0	0	0	0	0	0	0	0	0	0	0	0		Z(1144)	0	0	0	0	0	0	0	0	0	0	0	0	0	0			Y(1144)	0	0	0	0	1	0	1	0	0	0	0	0	0	0		Z(1144)
Y(1145)	0	0	0	0	0	0	0	0	0	0	0	0	0	0		Z(1145)	0	0	0	0	0	0	0	0	0	0	0	0	0	0			Y(1145)	0	0	0	0	1	0	1	0	0	0	0	0	0	0		Z(1145)
Y(1146)	0	0	0	0	0	0	0	0	0	0	0	0	0	0		Z(1146)	0	0	0	0	0	0	0	0	0	0	0	0	0	0			Y(1146)	0	0	0	0	1	0	1	0	0	0	0	0	0	0		Z(1146)
Y(1147)	0	0	0	0	0	0	0	0	0	0	0	0	0	0		Z(1147)	0	0	0	0	0	0	0	0	0	0	0	0	0	0			Y(1147)	0	0	0	0	1	0	1	0	0	0	0	0	0	0		Z(1147)
Y(1148)	0	0	0	0	0	0	0	0	0	0	0	0	0	0		Z(1148)	0	0	0	0	0	0	0	0	0	0	0	0	0	0			Y(1148)	0	0	0	0	1	0	1	0	0	0	0	0	0	0		Z(1148)
Y(1149)	0	0	0	0	0	0	0	0	0	0	0	0	0	0		Z(1149)	0	0	0	0	0	0	0	0	0	0	0	0	0	0			Y(1149)	0	0	0	0	1	0	1	0	0	0	0	0	0	0		Z(1149)
Y(1150)	0	0	0	0	0	0	0	0	0	0	0	0	0	0		Z(1150)	0	0	0	0	0	0	0	0	0	0	0	0	0	0			Y(1150)	0	0	0	0	1	0	4	0	0	0	0	0	0	0		Z(1150)
Y(1151)	0	0	0	0	0	0	0	0	0	0	0	0	0	0		Z(1151)	0	0	0	0	0	0	0	0	0	0	0	0	0	0			Y(1151)	0	0	0	0	3	0	1	0	0	0	0	0	0	0		Z(1151)
Y(1152)	0	0	0	0	0	0	0	0	0	0	0	0	0	0		Z(1152)	0	0	0	0	0	0	0	0	0	0	0	0	0	0			Y(1152)	0	0	0	0	4	0	1	0	0	0	0	0	0	0		Z(1152)
Y(1153)	0	0	0	0	0	0	0	0	0	0	0	0	0	0		Z(1153)	0	0	0	0	0	0	0	0	0	0	0	0	0	0			Y(1153)	0	0	0	0	1	0	1	0	0	0	0	0	0	0		Z(1153)
Y(1154)	0	0	0	0	0	0	0	0	0	0	0	0	0	0		Z(1154)	0	0	0	0	0	0	0	0	0	0	0	0	0	0			Y(1154)	0	0	0	0	1	0	1	0	0	0	0	0	0	0		Z(1154)
Y(1155)	0	0	0	0	0	0	0	0	0	0	0	0	0	0		Z(1155)	0	0	0	0	0	0	0	0	0	0	0	0	0	0			Y(1155)	0	0	0	0	1	0	1	0	0	0	0	0	0	0		Z(1155)
Y(1156)	0	0	0	0	0	0	0	0	0	0	0	0	0	0		Z(1156)	0	0	0	0	0	0	0	0	0	0	0	0	0	0			Y(1156)	0	0	0	0	1	0	1	0	0	0	0	0	0	0		Z(1156)
Y(1157)	0	0	0	0	0	0	0	0	0	0	0	0	0	0		Z(1157)	0	0	0	0	0	0	0	0	0	0	0	0	0	0			Y(1157)	0	0	0	0	1	0	1	0	0	0	0	0	0	0		Z(1157)
Y(1158)	0	0	0	0	0	0	0	0	0	0	0	0	0	0		Z(1158)	0	0	0	0	0	0	0	0	0	0	0	0	0	0			Y(1158)	0	0	0	0	1	0	1	0	0	0	0	0	0	0		Z(1158)
Y(1159)	0	0	0	0	0	0	0	0	0	0	0	0	0	0		Z(1159)	0	0	0	0	0	0	0	0	0	0	0	0	0	0			Y(1159)	0	0	0	0	4	0	4	0	0	0	0	0	0	0		Z(1159)
Y(1160)	0	0	0	0	0	0	0	0	0	0	0	0	0	0		Z(1160)	0	0	0	0	0	0	0	0	0	0	0	0	0	0			Y(1160)	0	0	0	0	1	0	1	0	0	0	0	0	0	0		Z(1160)
Y(1161)	0	0	0	0	0	0	0	0	0	0	0	0	0	0		Z(1161)	0	0	0	0	0	0	0	0	0	0	0	0	0	0			Y(1161)	0	0	0	0	1	0	1	0	0	0	0	0	0	0		Z(1161)
Y(1162)	0	0	0	0	0	0	0	0	0	0	0	0	0	0		Z(1162)	0	0	0	0	0	0	0	0	0	0	0	0	0	0			Y(1162)	0	0	0	0	1	0	1	0	0	0	0	0	0	0		Z(1162)
Y(1163)	0	0	0	0	0	0	0	0	0	0	0	0	0	0		Z(1163)	0	0	0	0	0	0	0	0	0	0	0	0	0	0			Y(1163)	0	0	0	0	1	0	1	0	0	0	0	0	0	0		Z(1163)
Y(1164)	0	0	0	0	0	0	0	0	0	0	0	0	0	0		Z(1164)	0	0	0	0	0	0	0	0	0	0	0	0	0	0			Y(1164)	0	0	0	0	1	0	1	0	0	0	0	0	0	0		Z(1164)
Y(1165)	0	0	0	0	0	0	0	0	0	0	0	0	0	0		Z(1165)	0	0	0	0	0	0	0	0	0	0	0	0	0	0			Y(1165)	0	0	0	0	1	0	1	0	0	0	0	0	0	0		Z(1165)
Y(1166)	0	0	0	0	0	0	0	0	0	0	0	0	0	0		Z(1166)	0	0	0	0	0	0	0	0	0	0	0	0	0	0			Y(1166)	0	0	0	0	1	0	1	0	0	0	0	0	0	0		Z(1166)
Y(1167)	0	0	0	0	0	0	0	0	0	0	0	0	0	0		Z(1167)	0	0	0	0	0	0	0	0	0	0	0	0	0	0			Y(1167)	0	0	0	0	1	0	4	0	0	0	0	0	0	0		Z(1167)
Y(1168)	0	0	0	0	0	0	0	0	0	0	0	0	0	0		Z(1168)	0	0	0	0	0	0	0	0	0	0	0	0	0	0			Y(1168)	0	0	0	0	1	0	1	0	0	0	0	0	0	0		Z(1168)
Y(1169)	0	0	0	0	0	0	0	0	0	0	0	0	0	0		Z(1169)	0	0	0	0	0	0	0	0	0	0	0	0	0	0			Y(1169)	0	0	0	0	1	0	1	0	0	0	0	0	0	0		Z(1169)
Y(1170)	0	0	0	0	0	0	0	0	0	0	0	0	0	0		Z(1170)	0	0	0	0	0	0	0	0	0	0	0	0	0	0			Y(1170)	0	0	0	0	1	0	1	0	0	0	0	0	0	0		Z(1170)
Y(1171)	0	0	0	0	0	0	0	0	0	0	0	0	0	0		Z(1171)	0	0	0	0	0	0	0	0	0	0	0	0	0	0			Y(1171)	0	0	0	0	1	0	4	0	0	0	0	0	0	0		Z(1171)
Y(1172)	0	0	0	0	0	0	0	0	0	0	0	0	0	0		Z(1172)	0	0	0	0	0	0	0	0	0	0	0	0	0	0			Y(1172)	0	0	0	0	3	0	1	0	0	0	0	0	0	0		Z(1172)
Y(1173)	0	0	0	0	0	0	0	0	0	0	0	0	0	0		Z(1173)	0	0	0	0	0	0	0	0	0	0	0	0	0	0			Y(1173)	0	0	0	0	4	0	1	0	0	0	0	0	0	0		Z(1173)
Y(1174)	0	0	0	0	0	0	0	0	0	0	0	0	0	0		Z(1174)	0	0	0	0	0	0	0	0	0	0	0	0	0	0			Y(1174)	0	0	0	0	1	0	1	0	0	0	0	0	0	0		Z(1174)
Y(1175)	0	0	0	0	0	0	0	0	0	0	0	0	0	0		Z(1175)	0	0	0	0	0	0	0	0	0	0	0	0	0	0			Y(1175)	0	0	0	0	1	0	1	0	0	0	0	0	0	0		Z(1175)
Y(1176)	0	0	0	0	0	0	0	0	0	0	0	0	0	0		Z(1176)	0	0	0	0	0	0	0	0	0	0	0	0	0	0			Y(1176)	0	0	0	0	1	0	1	0	0	0	0	0	0	0		Z(1176)
Y(1177)	0	0	0	0	0	0	0	0	0	0	0	0	0	0		Z(1177)	0	0	0	0	0	0	0	0	0	0	0	0	0	0			Y(1177)	0	0	0	0	1	0	1	0	0	0	0	0	0	0		Z(1177)
Y(1178)	0	0	0	0	0	0	0	0	0	0	0	0	0	0		Z(1178)	0	0	0	0	0	0	0	0	0	0	0	0	0	0			Y(1178)	0	0	0	0	4	0	1	0	0	0	0	0	0	0		Z(1178)
Y(1179)	0	0	0	0	0	0	0	0	0	0	0	0	0	0		Z(1179)	0	0	0	0	0	0	0	0	0	0	0	0	0	0			Y(1179)	0	0	0	0	4	0	1	0	0	0	0	0	0	0		Z(1179)
Y(1180)	0	0	0	0	0	0	0	0	0	0	0	0	0	0		Z(1180)	0	0	0	0	0	0	0	0	0	0	0	0	0	0			Y(1180)	0	0	0	0	1	0	1	0	0	0	0	0	0	0		Z(1180)
Y(1181)	0	0	0	0	0	0	0	0	0	0	0	0	0	0		Z(1181)	0	0	0	0	0	0	0	0	0	0	0	0	0	0			Y(1181)	0	0	0	0	1	0	1	0	0	0	0	0	0	0		Z(1181)
Y(1182)	0	0	0	0	0	0	0	0	0	0	0	0	0	0		Z(1182)	0	0	0	0	0	0	0	0	0	0	0	0	0	0			Y(1182)	0	0	0	0	1	0	4	0	0	0	0	0	0	0		Z(1182)
Y(1183)	0	0	0	0	0	0	0	0	0	0	0	0	0	0		Z(1183)	0	0	0	0	0	0	0	0	0	0	0	0	0	0			Y(1183)	0	0	0	0	1	0	1	0	0	0	0	0	0	0		Z(1183)
Y(1184)	0	0	0	0	0	0	0	0	0	0	0	0	0	0		Z(1184)	0	0	0	0	0	0	0	0	0	0	0	0	0	0			Y(1184)	0	0	0	0	1	0	1	0	0	0	0	0	0	0		Z(1184)
Y(1185)	0	0	0	0	0	0	0	0	0	0	0	0	0	0		Z(1185)	0	0	0	0	0	0	0	0	0	0	0	0	0	0			Y(1185)	0	0	0	0	4	0	1	0	0	0	0	0	0	0		Z(1185)
Y(1186)	0	0	0	0	0	0	0	0	0	0	0	0	0	0		Z(1186)	0	0	0	0	0	0	0	0	0	0	0	0	0	0			Y(1186)	0	0	0	0	1	0	1	0	0	0	0	0	0	0		Z(1186)
Y(1187)	0	0	0	0	0	0	0	0	0	0	0	0	0	0		Z(1187)	0	0	0	0	0	0	0	0	0	0	0	0	0	0			Y(1187)	0	0	0	0	1	0	1	0	0	0	0	0	0	0		Z(1187)
Y(1188)	0	0	0	0	0	0	0	0	0	0	0	0	0	0		Z(1188)	0	0	0	0	0	0	0	0	0	0	0	0	0	0			Y(1188)	0	0	0	0	1	0	1	0	0	0	0	0	0	0		Z(1188)
Y(1189)	0	0	0	0	0	0	0	0	0	0	0	0	0	0		Z(1189)	0	0	0	0	0	0	0	0	0	0	0	0	0	0			Y(1189)	0	0	0	0	1	0	1	0	0	0	0	0	0	0		Z(1189)
Y(1190)	0	0	0	0	0	0	0	0	0	0	0	0	0	0		Z(1190)	0	0	0	0	0	0	0	0	0	0	0	0	0	0			Y(1190)	0	0	0	0	1	0	1	0	0	0	0	0	0	0		Z(1190)
Y(1191)	0	0	0	0	0	0	0	0	0	0	0	0	0	0		Z(1191)	0	0	0	0	0	0	0	0	0	0	0	0	0	0			Y(1191)	0	0	0	0	1	0	4	0	0	0	0	0	0	0		Z(1191)
Y(1192)	0	0	0	0	0	0	0	0	0	0	0	0	0	0		Z(1192)	0	0	0	0	0	0	0	0	0	0	0	0	0	0			Y(1192)	0	0	0	0	1	0	1	0	0	0	0	0	0	0		Z(1192)
Y(1193)	0	0	0	0	0	0	0	0	0	0	0	0	0	0		Z(1193)	0	0	0	0	0	0	0	0	0	0	0	0	0	0			Y(1193)	0	0	0	0	1	0	1	0	0	0	0	0	0	0		Z(1193)
Y(1194)	0	0	0	0	0	0	0	0	0	0	0	0	0	0		Z(1194)	0	0	0	0	0	0	0	0	0	0	0	0	0	0			Y(1194)	0	0	0	0	4	0	1	0	0	0	0	0	0	0		Z(1194)
Y(1195)	0	0	0	0	0	0	0	0	0	0	0	0	0	0		Z(1195)	0	0	0	0	0	0	0	0	0	0	0	0	0	0			Y(1195)	0	0	0	0	1	0	1	0	0	0	0	0	0	0		Z(1195)
Y(1196)	0	0	0	0	0	0	0	0	0	0	0	0	0	0		Z(1196)	0	0	0	0	0	0	0	0	0	0	0	0	0	0			Y(1196)	0	0	0	0	1	0	4	0	0	0	0	0	0	0		Z(1196)
Y(1197)	0	0	0	0	0	0	0	0	0	0	0	0	0	0		Z(1197)	0	0	0	0	0	0	0	0	0	0	0	0	0	0			Y(1197)	0	0	0	0	1	0	1	0	0	0	0	0	0	0		Z(1197)
Y(1198)	0	0	0	0	0	0	0	0	0	0	0	0	0	0		Z(1198)	0	0	0	0	0	0	0	0	0	0	0	0	0	0			Y(1198)	0	0	0	0	1	0	1	0	0	0	0	0	0	0		Z(1198)
Y(1199)	0	0	0	0	0	0	0	0	0	0	0	0	0	0		Z(1199)	0	0	0	0	0	0	0	0	0	0	0	0	0	0			Y(1199)	0	0	0	0	1	0	1	0	0	0	0	0	0	0		Z(1199)
Y(1200)	0	0	0	0	0	0	0	0	0	0	0	0	0	0		Z(1200)	0	0	0	0	0	0	0	0	0	0	0	0	0	0			Y(1200)	0	0	0	0	1	0	1	0	0	0	0	0	0	0		Z(1200)
Y(1201)	0	0	0	0	0	0	0	0	0	0	0	0	0	0		Z(1201)	0	0	0	0	0	0	0	0	0	0	0	0	0	0			Y(1201)	0	0	0	0	4	0	1	0	0	0	0	0	0	0		Z(1201)
Y(1202)	0	0	0	0	0	0	0	0	0	0	0	0	0	0		Z(1202)	0	0	0	0	0	0	0	0	0	0	0	0	0	0			Y(1202)	0	0	0	0	1	0	1	0	0	0	0	0	0	0		Z(1202)
Y(1203)	0	0	0	0	0	0	0	0	0	0	0	0	0	0		Z(1203)	0	0	0	0	0	0	0	0	0	0	0	0	0	0			Y(1203)	0	0	0	0	1	0	1	0	0	0	0	0	0	0		Z(1203)
Y(1204)	0	0	0	0	0	0	0	0	0	0	0	0	0	0		Z(1204)	0	0	0	0	0	0	0	0	0	0	0	0	0	0			Y(1204)	0	0	0	0	1	0	1	0	0	0	0	0	0	0		Z(1204)
Y(1205)	0	0	0	0	0	0	0	0	0	0	0	0	0	0		Z(1205)	0	0	0	0	0	0	0	0	0	0	0	0	0	0			Y(1205)	0	0	0	0	1	0	1	0	0	0	0	0	0	0		Z(1205)
Y(1206)	0	0	0	0	0	0	0	0	0	0	0	0	0	0		Z(1206)	0	0	0	0	0	0	0	0	0	0	0	0	0	0			Y(1206)	0	0	0	0	4	0	1	0	0	0	0	0	0	0		Z(1206)
Y(1207)	0	0	0	0	0	0	0	0	0	0	0	0	0	0		Z(1207)	0	0	0	0	0	0	0	0	0	0	0	0	0	0			Y(1207)	0	0	0	0	4	0	1	0	0	0	0	0	0	0		Z(1207)
Y(1208)	0	0	0	0	0	0	0	0	0	0	0	0	0	0		Z(1208)	0	0	0	0	0	0	0	0	0	0	0	0	0	0			Y(1208)	0	0	0	0	1	0	1	0	0	0	0	0	0	0		Z(1208)
Y(1209)	0	0	0	0	0	0	0	0	0	0	0	0	0	0		Z(1209)	0	0	0	0	0	0	0	0	0	0	0	0	0	0			Y(1209)	0	0	0	0	1	0	4	0	0	0	0	0	0	0		Z(1209)
Y(1210)	0	0	0	0	0	0	0	0	0	0	0	0	0	0		Z(1210)	0	0	0	0	0	0	0	0	0	0	0	0	0	0			Y(1210)	0	0	0	0	1	0	1	0	0	0	0	0	0	0		Z(1210)
Y(1211)	0	0	0	0	0	0	0	0	0	0	0	0	0	0		Z(1211)	0	0	0	0	0	0	0	0	0	0	0	0	0	0			Y(1211)	0	0	0	0	4	0	1	0	0	0	0	0	0	0		Z(1211)
Y(1212)	0	0	0	0	0	0	0	0	0	0	0	0	0	0		Z(1212)	0	0	0	0	0	0	0	0	0	0	0	0	0	0			Y(1212)	0	0	0	0	1	0	1	0	0	0	0	0	0	0		Z(1212)
Y(1213)	0	0	0	0	0	0	0	0	0	0	0	0	0	0		Z(1213)	0	0	0	0	0	0	0	0	0	0	0	0	0	0			Y(1213)	0	0	0	0	1	0	1	0	0	0	0	0	0	0		Z(1213)
Y(1214)	0	0	0	0	0	0	0	0	0	0	0	0	0	0		Z(1214)	0	0	0	0	0	0	0	0	0	0	0	0	0	0			Y(1214)	0	0	0	0	1	0	4	0	0	0	0	0	0	0		Z(1214)
Y(1215)	0	0	0	0	0	0	0	0	0	0	0	0	0	0		Z(1215)	0	0	0	0	0	0	0	0	0	0	0	0	0	0			Y(1215)	0	0	0	0	1	0	1	0	0	0	0	0	0	0		Z(1215)
Y(1216)	0	0	0	0	0	0	0	0	0	0	0	0	0	0		Z(1216)	0	0	0	0	0	0	0	0	0	0	0	0	0	0			Y(1216)	0	0	0	0	1	0	1	0	0	0	0	0	0	0		Z(1216)
Y(1217)	0	0	0	0	0	0	0	0	0	0	0	0	0	0		Z(1217)	0	0	0	0	0	0	0	0	0	0	0	0	0	0			Y(1217)	0	0	0	0	1	0	1	0	0	0	0	0	0	0		Z(1217)
Y(1218)	0	0	0	0	0	0	0	0	0	0	0	0	0	0		Z(1218)	0	0	0	0	0	0	0	0	0	0	0	0	0	0			Y(1218)	0	0	0	0	1	0	1	0	0	0	0	0	0	0		Z(1218)
Y(1219)	0	0	0	0	0	0	0	0	0	0	0	0	0	0		Z(1219)	0	0	0	0	0	0	0	0	0	0	0	0	0	0			Y(1219)	0	0	0	0	4	0	1	0	0	0	0	0	0	0		Z(1219)
Y(1220)	0	0	0	0	0	0	0	0	0	0	0	0	0	0		Z(1220)	0	0	0	0	0	0	0	0	0	0	0	0	0	0			Y(1220)	0	0	0	0	1	0	1	0	0	0	0	0	0	0		Z(1220)
Y(1221)	0	0	0	0	0	0	0	0	0	0	0	0	0	0		Z(1221)	0	0	0	0	0	0	0	0	0	0	0	0	0	0			Y(1221)	0	0	0	0	1	0	1	0	0	0	0	0	0	0		Z(1221)
Y(1222)	0	0	0	0	0	0	0	0	0	0	0	0	0	0		Z(1222)	0	0	0	0	0	0	0	0	0	0	0	0	0	0			Y(1222)	0	0	0	0	4	0	1	0	0	0	0	0	0	0		Z(1222)
Y(1223)	0	0	0	0	0	0	0	0	0	0	0	0	0	0		Z(1223)	0	0	0	0	0	0	0	0	0	0	0	0	0	0			Y(1223)	0	0	0	0	4	0	1	0	0	0	0	0	0	0		Z(1223)
Y(1224)	0	0	0	0	0	0	0	0	0	0	0	0	0	0		Z(1224)	0	0	0	0	0	0	0	0	0	0	0	0	0	0			Y(1224)	0	0	0	0	1	0	3	0	0	0	0	0	0	0		Z(1224)
Y(1225)	0	0	0	0	0	0	0	0	0	0	0	0	0	0		Z(1225)	0	0	0	0	0	0	0	0	0	0	0	0	0	0			Y(1225)	0	0	0	0	1	0	4	0	0	0	0	0	0	0		Z(1225)
Y(1226)	0	0	0	0	0	0	0	0	0	0	0	0	0	0		Z(1226)	0	0	0	0	0	0	0	0	0	0	0	0	0	0			Y(1226)	0	0	0	0	1	0	4	0	0	0	0	0	0	0		Z(1226)
Y(1227)	0	0	0	0	0	0	0	0	0	0	0	0	0	0		Z(1227)	0	0	0	0	0	0	0	0	0	0	0	0	0	0			Y(1227)	0	0	0	0	1	0	1	0	0	0	0	0	0	0		Z(1227)
Y(1228)	0	0	0	0	0	0	0	0	0	0	0	0	0	0		Z(1228)	0	0	0	0	0	0	0	0	0	0	0	0	0	0			Y(1228)	0	0	0	0	1	0	1	0	0	0	0	0	0	0		Z(1228)
Y(1229)	0	0	0	0	0	0	0	0	0	0	0	0	0	0		Z(1229)	0	0	0	0	0	0	0	0	0	0	0	0	0	0			Y(1229)	0	0	0	0	1	0	1	0	0	0	0	0	0	0		Z(1229)
Y(1230)	0	0	0	0	0	0	0	0	0	0	0	0	0	0		Z(1230)	0	0	0	0	0	0	0	0	0	0	0	0	0	0			Y(1230)	0	0	0	0	4	0	1	0	0	0	0	0	0	0		Z(1230)
Y(1231)	0	0	0	0	0	0	0	0	0	0	0	0	0	0		Z(1231)	0	0	0	0	0	0	0	0	0	0	0	0	0	0			Y(1231)	0	0	0	0	1	0	1	0	0	0	0	0	0	0		Z(1231)
Y(1232)	0	0	0	0	0	0	0	0	0	0	0	0	0	0		Z(1232)	0	0	0	0	0	0	0	0	0	0	0	0	0	0			Y(1232)	0	0	0	0	1	0	4	0	0	0	0	0	0	0		Z(1232)
Y(1233)	0	0	0	0	0	0	0	0	0	0	0	0	0	0		Z(1233)	0	0	0	0	0	0	0	0	0	0	0	0	0	0			Y(1233)	0	0	0	0	4	0	1	0	0	0	0	0	0	0		Z(1233)
Y(1234)	0	0	0	0	0	0	0	0	0	0	0	0	0	0		Z(1234)	0	0	0	0	0	0	0	0	0	0	0	0	0	0			Y(1234)	0	0	0	0	1	0	1	0	0	0	0	0	0	0		Z(1234)
Y(1235)	0	0	0	0	0	0	0	0	0	0	0	0	0	0		Z(1235)	0	0	0	0	0	0	0	0	0	0	0	0	0	0			Y(1235)	0	0	0	0	1	0	1	0	0	0	0	0	0	0		Z(1235)
Y(1236)	0	0	0	0	0	0	0	0	0	0	0	0	0	0		Z(1236)	0	0	0	0	0	0	0	0	0	0	0	0	0	0			Y(1236)	0	0	0	0	1	0	4	0	0	0	0	0	0	0		Z(1236)
Y(1237)	0	0	0	0	0	0	0	0	0	0	0	0	0	0		Z(1237)	0	0	0	0	0	0	0	0	0	0	0	0	0	0			Y(1237)	0	0	0	0	1	0	1	0	0	0	0	0	0	0		Z(1237)
Y(1238)	0	0	0	0	0	0	0	0	0	0	0	0	0	0		Z(1238)	0	0	0	0	0	0	0	0	0	0	0	0	0	0			Y(1238)	0	0	0	0	1	0	1	0	0	0	0	0	0	0		Z(1238)
Y(1239)	0	0	0	0	0	0	0	0	0	0	0	0	0	0		Z(1239)	0	0	0	0	0	0	0	0	0	0	0	0	0	0			Y(1239)	0	0	0	0	1	0	1	0	0	0	0	0	0	0		Z(1239)
Y(1240)	0	0	0	0	0	0	0	0	0	0	0	0	0	0		Z(1240)	0	0	0	0	0	0	0	0	0	0	0	0	0	0			Y(1240)	0	0	0	0	4	0	4	0	0	0	0	0	0	0		Z(1240)
Y(1241)	0	0	0	0	0	0	0	0	0	0	0	0	0	0		Z(1241)	0	0	0	0	0	0	0	0	0	0	0	0	0	0			Y(1241)	0	0	0	0	1	0	1	0	0	0	0	0	0	0		Z(1241)
Y(1242)	0	0	0	0	0	0	0	0	0	0	0	0	0	0		Z(1242)	0	0	0	0	0	0	0	0	0	0	0	0	0	0			Y(1242)	0	0	0	0	1	0	1	0	0	0	0	0	0	0		Z(1242)
Y(1243)	0	0	0	0	0	0	0	0	0	0	0	0	0	0		Z(1243)	0	0	0	0	0	0	0	0	0	0	0	0	0	0			Y(1243)	0	0	0	0	1	0	1	0	0	0	0	0	0	0		Z(1243)
Y(1244)	0	0	0	0	0	0	0	0	0	0	0	0	0	0		Z(1244)	0	0	0	0	0	0	0	0	0	0	0	0	0	0			Y(1244)	0	0	0	0	1	0	1	0	0	0	0	0	0	0		Z(1244)
Y(1245)	0	0	0	0	0	0	0	0	0	0	0	0	0	0		Z(1245)	0	0	0	0	0	0	0	0	0	0	0	0	0	0			Y(1245)	0	0	0	0	1	0	1	0	0	0	0	0	0	0		Z(1245)
Y(1246)	0	0	0	0	0	0	0	0	0	0	0	0	0	0		Z(1246)	0	0	0	0	0	0	0	0	0	0	0	0	0	0			Y(1246)	0	0	0	0	1	0	1	0	0	0	0	0	0	0		Z(1246)
Y(1247)	0	0	0	0	0	0	0	0	0	0	0	0	0	0		Z(1247)	0	0	0	0	0	0	0	0	0	0	0	0	0	0			Y(1247)	0	0	0	0	1	0	4	0	0	0	0	0	0	0		Z(1247)
Y(1248)	0	0	0	0	0	0	0	0	0	0	0	0	0	0		Z(1248)	0	0	0	0	0	0	0	0	0	0	0	0	0	0			Y(1248)	0	0	0	0	1	0	1	0	0	0	0	0	0	0		Z(1248)
Y(1249)	0	0	0	0	0	0	0	0	0	0	0	0	0	0		Z(1249)	0	0	0	0	0	0	0	0	0	0	0	0	0	0			Y(1249)	0	0	0	0	4	0	1	0	0	0	0	0	0	0		Z(1249)
Y(1250)	0	0	0	0	0	0	0	0	0	0	0	0	0	0		Z(1250)	0	0	0	0	0	0	0	0	0	0	0	0	0	0			Y(1250)	0	0	0	0	4	0	1	0	0	0	0	0	0	0		Z(1250)
Y(1251)	0	0	0	0	0	0	0	0	0	0	0	0	0	0		Z(1251)	0	0	0	0	0	0	0	0	0	0	0	0	0	0			Y(1251)	0	0	0	0	1	0	1	0	0	0	0	0	0	0		Z(1251)
Y(1252)	0	0	0	0	0	0	0	0	0	0	0	0	0	0		Z(1252)	0	0	0	0	0	0	0	0	0	0	0	0	0	0			Y(1252)	0	0	0	0	1	0	1	0	0	0	0	0	0	0		Z(1252)
Y(1253)	0	0	0	0	0	0	0	0	0	0	0	0	0	0		Z(1253)	0	0	0	0	0	0	0	0	0	0	0	0	0	0			Y(1253)	0	0	0	0	1	0	1	0	0	0	0	0	0	0		Z(1253)
Y(1254)	0	0	0	0	0	0	0	0	0	0	0	0	0	0		Z(1254)	0	0	0	0	0	0	0	0	0	0	0	0	0	0			Y(1254)	0	0	0	0	4	0	4	0	0	0	0	0	0	0		Z(1254)
Y(1255)	0	0	0	0	0	0	0	0	0	0	0	0	0	0		Z(1255)	0	0	0	0	0	0	0	0	0	0	0	0	0	0			Y(1255)	0	0	0	0	1	0	4	0	0	0	0	0	0	0		Z(1255)
Y(1256)	0	0	0	0	0	0	0	0	0	0	0	0	0	0		Z(1256)	0	0	0	0	0	0	0	0	0	0	0	0	0	0			Y(1256)	0	0	0	0	1	0	1	0	0	0	0	0	0	0		Z(1256)
Y(1257)	0	0	0	0	0	0	0	0	0	0	0	0	0	0		Z(1257)	0	0	0	0	0	0	0	0	0	0	0	0	0	0			Y(1257)	0	0	0	0	1	0	1	0	0	0	0	0	0	0		Z(1257)
Y(1258)	0	0	0	0	0	0	0	0	0	0	0	0	0	0		Z(1258)	0	0	0	0	0	0	0	0	0	0	0	0	0	0			Y(1258)	0	0	0	0	1	0	1	0	0	0	0	0	0	0		Z(1258)
Y(1259)	0	0	0	0	0	0	0	0	0	0	0	0	0	0		Z(1259)	0	0	0	0	0	0	0	0	0	0	0	0	0	0			Y(1259)	0	0	0	0	1	0	1	0	0	0	0	0	0	0		Z(1259)
Y(1260)	0	0	0	0	0	0	0	0	0	0	0	0	0	0		Z(1260)	0	0	0	0	0	0	0	0	0	0	0	0	0	0			Y(1260)	0	0	0	0	4	0	1	0	0	0	0	0	0	0		Z(1260)
Y(1261)	0	0	0	0	0	0	0	0	0	0	0	0	0	0		Z(1261)	0	0	0	0	0	0	0	0	0	0	0	0	0	0			Y(1261)	0	0	0	0	1	0	1	0	0	0	0	0	0	0		Z(1261)
Y(1262)	0	0	0	0	0	0	0	0	0	0	0	0	0	0		Z(1262)	0	0	0	0	0	0	0	0	0	0	0	0	0	0			Y(1262)	0	0	0	0	1	0	1	0	0	0	0	0	0	0		Z(1262)
Y(1263)	0	0	0	0	0	0	0	0	0	0	0	0	0	0		Z(1263)	0	0	0	0	0	0	0	0	0	0	0	0	0	0			Y(1263)	0	0	0	0	1	0	1	0	0	0	0	0	0	0		Z(1263)
Y(1264)	0	0	0	0	0	0	0	0	0	0	0	0	0	0		Z(1264)	0	0	0	0	0	0	0	0	0	0	0	0	0	0			Y(1264)	0	0	0	0	1	0	1	0	0	0	0	0	0	0		Z(1264)
Y(1265)	0	0	0	0	0	0	0	0	0	0	0	0	0	0		Z(1265)	0	0	0	0	0	0	0	0	0	0	0	0	0	0			Y(1265)	0	0	0	0	4	0	1	0	0	0	0	0	0	0		Z(1265)
Y(1266)	0	0	0	0	0	0	0	0	0	0	0	0	0	0		Z(1266)	0	0	0	0	0	0	0	0	0	0	0	0	0	0			Y(1266)	0	0	0	0	1	0	1	0	0	0	0	0	0	0		Z(1266)
Y(1267)	0	0	0	0	0	0	0	0	0	0	0	0	0	0		Z(1267)	0	0	0	0	0	0	0	0	0	0	0	0	0	0			Y(1267)	0	0	0	0	1	0	1	0	0	0	0	0	0	0		Z(1267)
Y(1268)	0	0	0	0	0	0	0	0	0	0	0	0	0	0		Z(1268)	0	0	0	0	0	0	0	0	0	0	0	0	0	0			Y(1268)	0	0	0	0	1	0	1	0	0	0	0	0	0	0		Z(1268)
Y(1269)	0	0	0	0	0	0	0	0	0	0	0	0	0	0		Z(1269)	0	0	0	0	0	0	0	0	0	0	0	0	0	0			Y(1269)	0	0	0	0	1	0	3	0	0	0	0	0	0	0		Z(1269)
Y(1270)	0	0	0	0	0	0	0	0	0	0	0	0	0	0		Z(1270)	0	0	0	0	0	0	0	0	0	0	0	0	0	0			Y(1270)	0	0	0	0	4	0	0	0	0	0	0	0	0	0		Z(1270)
Y(1271)	0	0	0	0	0	0	0	0	0	0	0	0	0	0		Z(1271)	0	0	0	0	0	0	0	0	0	0	0	0	0	0			Y(1271)	0	0	0	0	1	0	0	0	0	0	0	0	0	0		Z(1271)
Y(1272)	0	0	0	0	0	0	0	0	0	0	0	0	0	0		Z(1272)	0	0	0	0	0	0	0	0	0	0	0	0	0	0			Y(1272)	0	0	0	0	1	0	0	0	0	0	0	0	0	0		Z(1272)
Y(1273)	0	0	0	0	0	0	0	0	0	0	0	0	0	0		Z(1273)	0	0	0	0	0	0	0	0	0	0	0	0	0	0			Y(1273)	0	0	0	0	1	0	0	0	0	0	0	0	0	0		Z(1273)
Y(1274)	0	0	0	0	0	0	0	0	0	0	0	0	0	0		Z(1274)	0	0	0	0	0	0	0	0	0	0	0	0	0	0			Y(1274)	0	0	0	0	1	0	0	0	0	0	0	0	0	0		Z(1274)
Y(1275)	0	0	0	0	0	0	0	0	0	0	0	0	0	0		Z(1275)	0	0	0	0	0	0	0	0	0	0	0	0	0	0			Y(1275)	0	0	0	0	4	0	0	0	0	0	0	0	0	0		Z(1275)
Y(1276)	0	0	0	0	0	0	0	0	0	0	0	0	0	0		Z(1276)	0	0	0	0	0	0	0	0	0	0	0	0	0	0			Y(1276)	0	0	0	0	1	0	0	0	0	0	0	0	0	0		Z(1276)
Y(1277)	0	0	0	0	0	0	0	0	0	0	0	0	0	0		Z(1277)	0	0	0	0	0	0	0	0	0	0	0	0	0	0			Y(1277)	0	0	0	0	1	0	0	0	0	0	0	0	0	0		Z(1277)
Y(1278)	0	0	0	0	0	0	0	0	0	0	0	0	0	0		Z(1278)	0	0	0	0	0	0	0	0	0	0	0	0	0	0			Y(1278)	0	0	0	0	1	0	0	0	0	0	0	0	0	0		Z(1278)
Y(1279)	0	0	0	0	0	0	0	0	0	0	0	0	0	0		Z(1279)	0	0	0	0	0	0	0	0	0	0	0	0	0	0			Y(1279)	0	0	0	0	1	0	0	0	0	0	0	0	0	0		Z(1279)
Y(1280)	0	0	0	0	0	0	0	0	0	0	0	0	0	0		Z(1280)	0	0	0	0	0	0	0	0	0	0	0	0	0	0			Y(1280)	0	0	0	0	1	0	0	0	0	0	0	0	0	0		Z(1280)
Y(1281)	0	0	0	0	0	0	0	0	0	0	0	0	0	0		Z(1281)	0	0	0	0	0	0	0	0	0	0	0	0	0	0			Y(1281)	0	0	0	0	1	0	0	0	0	0	0	0	0	0		Z(1281)
Y(1282)	0	0	0	0	0	0	0	0	0	0	0	0	0	0		Z(1282)	0	0	0	0	0	0	0	0	0	0	0	0	0	0			Y(1282)	0	0	0	0	1	0	0	0	0	0	0	0	0	0		Z(1282)
Y(1283)	0	0	0	0	0	0	0	0	0	0	0	0	0	0		Z(1283)	0	0	0	0	0	0	0	0	0	0	0	0	0	0			Y(1283)	0	0	0	0	4	0	0	0	0	0	0	0	0	0		Z(1283)
Y(1284)	0	0	0	0	0	0	0	0	0	0	0	0	0	0		Z(1284)	0	0	0	0	0	0	0	0	0	0	0	0	0	0			Y(1284)	0	0	0	0	1	0	0	0	0	0	0	0	0	0		Z(1284)
Y(1285)	0	0	0	0	0	0	0	0	0	0	0	0	0	0		Z(1285)	0	0	0	0	0	0	0	0	0	0	0	0	0	0			Y(1285)	0	0	0	0	1	0	0	0	0	0	0	0	0	0		Z(1285)
Y(1286)	0	0	0	0	0	0	0	0	0	0	0	0	0	0		Z(1286)	0	0	0	0	0	0	0	0	0	0	0	0	0	0			Y(1286)	0	0	0	0	1	0	0	0	0	0	0	0	0	0		Z(1286)
Y(1287)	0	0	0	0	0	0	0	0	0	0	0	0	0	0		Z(1287)	0	0	0	0	0	0	0	0	0	0	0	0	0	0			Y(1287)	0	0	0	0	1	0	0	0	0	0	0	0	0	0		Z(1287)
Y(1288)	0	0	0	0	0	0	0	0	0	0	0	0	0	0		Z(1288)	0	0	0	0	0	0	0	0	0	0	0	0	0	0			Y(1288)	0	0	0	0	1	0	0	0	0	0	0	0	0	0		Z(1288)
Y(1289)	0	0	0	0	0	0	0	0	0	0	0	0	0	0		Z(1289)	0	0	0	0	0	0	0	0	0	0	0	0	0	0			Y(1289)	0	0	0	0	1	0	0	0	0	0	0	0	0	0		Z(1289)
Y(1290)	0	0	0	0	0	0	0	0	0	0	0	0	0	0		Z(1290)	0	0	0	0	0	0	0	0	0	0	0	0	0	0			Y(1290)	0	0	0	0	1	0	0	0	0	0	0	0	0	0		Z(1290)
Y(1291)	0	0	0	0	0	0	0	0	0	0	0	0	0	0		Z(1291)	0	0	0	0	0	0	0	0	0	0	0	0	0	0			Y(1291)	0	0	0	0	1	0	0	0	0	0	0	0	0	0		Z(1291)
Y(1292)	0	0	0	0	0	0	0	0	0	0	0	0	0	0		Z(1292)	0	0	0	0	0	0	0	0	0	0	0	0	0	0			Y(1292)	0	0	0	0	1	0	0	0	0	0	0	0	0	0		Z(1292)
Y(1293)	0	0	0	0	0	0	0	0	0	0	0	0	0	0		Z(1293)	0	0	0	0	0	0	0	0	0	0	0	0	0	0			Y(1293)	0	0	0	0	4	0	0	0	0	0	0	0	0	0		Z(1293)
Y(1294)	0	0	0	0	0	0	0	0	0	0	0	0	0	0		Z(1294)	0	0	0	0	0	0	0	0	0	0	0	0	0	0			Y(1294)	0	0	0	0	1	0	0	0	0	0	0	0	0	0		Z(1294)
Y(1295)	0	0	0	0	0	0	0	0	0	0	0	0	0	0		Z(1295)	0	0	0	0	0	0	0	0	0	0	0	0	0	0			Y(1295)	0	0	0	0	1	0	0	0	0	0	0	0	0	0		Z(1295)
Y(1296)	0	0	0	0	0	0	0	0	0	0	0	0	0	0		Z(1296)	0	0	0	0	0	0	0	0	0	0	0	0	0	0			Y(1296)	0	0	0	0	1	0	0	0	0	0	0	0	0	0		Z(1296)
Y(1297)	0	0	0	0	0	0	0	0	0	0	0	0	0	0		Z(1297)	0	0	0	0	0	0	0	0	0	0	0	0	0	0			Y(1297)	0	0	0	0	1	0	0	0	0	0	0	0	0	0		Z(1297)
Y(1298)	0	0	0	0	0	0	0	0	0	0	0	0	0	0		Z(1298)	0	0	0	0	0	0	0	0	0	0	0	0	0	0			Y(1298)	0	0	0	0	1	0	0	0	0	0	0	0	0	0		Z(1298)
Y(1299)	0	0	0	0	0	0	0	0	0	0	0	0	0	0		Z(1299)	0	0	0	0	0	0	0	0	0	0	0	0	0	0			Y(1299)	0	0	0	0	1	0	0	0	0	0	0	0	0	0		Z(1299)
Y(1300)	0	0	0	0	0	0	0	0	0	0	0	0	0	0		Z(1300)	0	0	0	0	0	0	0	0	0	0	0	0	0	0			Y(1300)	0	0	0	0	1	0	0	0	0	0	0	0	0	0		Z(1300)
Y(1301)	0	0	0	0	0	0	0	0	0	0	0	0	0	0		Z(1301)	0	0	0	0	0	0	0	0	0	0	0	0	0	0			Y(1301)	0	0	0	0	4	0	0	0	0	0	0	0	0	0		Z(1301)
Y(1302)	0	0	0	0	0	0	0	0	0	0	0	0	0	0		Z(1302)	0	0	0	0	0	0	0	0	0	0	0	0	0	0			Y(1302)	0	0	0	0	1	0	0	0	0	0	0	0	0	0		Z(1302)
Y(1303)	0	0	0	0	0	0	0	0	0	0	0	0	0	0		Z(1303)	0	0	0	0	0	0	0	0	0	0	0	0	0	0			Y(1303)	0	0	0	0	1	0	0	0	0	0	0	0	0	0		Z(1303)
Y(1304)	0	0	0	0	0	0	0	0	0	0	0	0	0	0		Z(1304)	0	0	0	0	0	0	0	0	0	0	0	0	0	0			Y(1304)	0	0	0	0	1	0	0	0	0	0	0	0	0	0		Z(1304)
Y(1305)	0	0	0	0	0	0	0	0	0	0	0	0	0	0		Z(1305)	0	0	0	0	0	0	0	0	0	0	0	0	0	0			Y(1305)	0	0	0	0	4	0	0	0	0	0	0	0	0	0		Z(1305)
Y(1306)	0	0	0	0	0	0	0	0	0	0	0	0	0	0		Z(1306)	0	0	0	0	0	0	0	0	0	0	0	0	0	0			Y(1306)	0	0	0	0	1	0	0	0	0	0	0	0	0	0		Z(1306)
Y(1307)	0	0	0	0	0	0	0	0	0	0	0	0	0	0		Z(1307)	0	0	0	0	0	0	0	0	0	0	0	0	0	0			Y(1307)	0	0	0	0	1	0	0	0	0	0	0	0	0	0		Z(1307)
Y(1308)	0	0	0	0	0	0	0	0	0	0	0	0	0	0		Z(1308)	0	0	0	0	0	0	0	0	0	0	0	0	0	0			Y(1308)	0	0	0	0	1	0	0	0	0	0	0	0	0	0		Z(1308)
Y(1309)	0	0	0	0	0	0	0	0	0	0	0	0	0	0		Z(1309)	0	0	0	0	0	0	0	0	0	0	0	0	0	0			Y(1309)	0	0	0	0	1	0	0	0	0	0	0	0	0	0		Z(1309)
Y(1310)	0	0	0	0	0	0	0	0	0	0	0	0	0	0		Z(1310)	0	0	0	0	0	0	0	0	0	0	0	0	0	0			Y(1310)	0	0	0	0	1	0	0	0	0	0	0	0	0	0		Z(1310)
Y(1311)	0	0	0	0	0	0	0	0	0	0	0	0	0	0		Z(1311)	0	0	0	0	0	0	0	0	0	0	0	0	0	0			Y(1311)	0	0	0	0	4	0	0	0	0	0	0	0	0	0		Z(1311)
Y(1312)	0	0	0	0	0	0	0	0	0	0	0	0	0	0		Z(1312)	0	0	0	0	0	0	0	0	0	0	0	0	0	0			Y(1312)	0	0	0	0	1	0	0	0	0	0	0	0	0	0		Z(1312)
Y(1313)	0	0	0	0	0	0	0	0	0	0	0	0	0	0		Z(1313)	0	0	0	0	0	0	0	0	0	0	0	0	0	0			Y(1313)	0	0	0	0	1	0	0	0	0	0	0	0	0	0		Z(1313)
Y(1314)	0	0	0	0	0	0	0	0	0	0	0	0	0	0		Z(1314)	0	0	0	0	0	0	0	0	0	0	0	0	0	0			Y(1314)	0	0	0	0	1	0	0	0	0	0	0	0	0	0		Z(1314)
Y(1315)	0	0	0	0	0	0	0	0	0	0	0	0	0	0		Z(1315)	0	0	0	0	0	0	0	0	0	0	0	0	0	0			Y(1315)	0	0	0	0	1	0	0	0	0	0	0	0	0	0		Z(1315)
Y(1316)	0	0	0	0	0	0	0	0	0	0	0	0	0	0		Z(1316)	0	0	0	0	0	0	0	0	0	0	0	0	0	0			Y(1316)	0	0	0	0	1	0	0	0	0	0	0	0	0	0		Z(1316)
Y(1317)	0	0	0	0	0	0	0	0	0	0	0	0	0	0		Z(1317)	0	0	0	0	0	0	0	0	0	0	0	0	0	0			Y(1317)	0	0	0	0	1	0	0	0	0	0	0	0	0	0		Z(1317)
Y(1318)	0	0	0	0	0	0	0	0	0	0	0	0	0	0		Z(1318)	0	0	0	0	0	0	0	0	0	0	0	0	0	0			Y(1318)	0	0	0	0	1	0	0	0	0	0	0	0	0	0		Z(1318)
Y(1319)	0	0	0	0	0	0	0	0	0	0	0	0	0	0		Z(1319)	0	0	0	0	0	0	0	0	0	0	0	0	0	0			Y(1319)	0	0	0	0	3	0	0	0	0	0	0	0	0	0		Z(1319)
Y(1320)	0	0	0	0	0	0	0	0	0	0	0	0	0	0		Z(1320)	0	0	0	0	0	0	0	0	0	0	0	0	0	0
Y(1321)	0	0	0	0	0	0	0	0	0	0	0	0	0	0		Z(1321)	0	0	0	0	0	0	0	0	0	0	0	0	0	0
Y(1322)	0	0	0	0	0	0	0	0	0	0	0	0	0	0		Z(1322)	0	0	0	0	0	0	0	0	0	0	0	0	0	0
Y(1323)	0	0	0	0	0	0	0	0	0	0	0	0	0	0		Z(1323)	0	0	0	0	0	0	0	0	0	0	0	0	0	0
Y(1324)	0	0	0	0	0	0	0	0	0	0	0	0	0	0		Z(1324)	0	0	0	0	0	0	0	0	0	0	0	0	0	0
Y(1325)	0	0	0	0	0	0	0	0	0	0	0	0	0	0		Z(1325)	0	0	0	0	0	0	0	0	0	0	0	0	0	0
Y(1326)	0	0	0	0	0	0	0	0	0	0	0	0	0	0		Z(1326)	0	0	0	0	0	0	0	0	0	0	0	0	0	0
Y(1327)	0	0	0	0	0	0	0	0	0	0	0	0	0	0		Z(1327)	0	0	0	0	0	0	0	0	0	0	0	0	0	0
Y(1328)	0	0	0	0	0	0	0	0	0	0	0	0	0	0		Z(1328)	0	0	0	0	0	0	0	0	0	0	0	0	0	0
Y(1329)	0	0	0	0	0	0	0	0	0	0	0	0	0	0		Z(1329)	0	0	0	0	0	0	0	0	0	0	0	0	0	0
Y(1330)	0	0	0	0	0	0	0	0	0	0	0	0	0	0		Z(1330)	0	0	0	0	0	0	0	0	0	0	0	0	0	0
Y(1331)	0	0	0	0	0	0	0	0	0	0	0	0	0	0		Z(1331)	0	0	0	0	0	0	0	0	0	0	0	0	0	0
Y(1332)	0	0	0	0	0	0	0	0	0	0	0	0	0	0		Z(1332)	0	0	0	0	0	0	0	0	0	0	0	0	0	0
Y(1333)	0	0	0	0	0	0	0	0	0	0	0	0	0	0		Z(1333)	0	0	0	0	0	0	0	0	0	0	0	0	0	0
Y(1334)	0	0	0	0	0	0	0	0	0	0	0	0	0	0		Z(1334)	0	0	0	0	0	0	0	0	0	0	0	0	0	0
Y(1335)	0	0	0	0	0	0	0	0	0	0	0	0	0	0		Z(1335)	0	0	0	0	0	0	0	0	0	0	0	0	0	0
Y(1336)	0	0	0	0	0	0	0	0	0	0	0	0	0	0		Z(1336)	0	0	0	0	0	0	0	0	0	0	0	0	0	0
Y(1337)	0	0	0	0	0	0	0	0	0	0	0	0	0	0		Z(1337)	0	0	0	0	0	0	0	0	0	0	0	0	0	0
Y(1338)	0	0	0	0	0	0	0	0	0	0	0	0	0	0		Z(1338)	0	0	0	0	0	0	0	0	0	0	0	0	0	0
Y(1339)	0	0	0	0	0	0	0	0	0	0	0	0	0	0		Z(1339)	0	0	0	0	0	0	0	0	0	0	0	0	0	0
Y(1340)	0	0	0	0	0	0	0	0	0	0	0	0	0	0		Z(1340)	0	0	0	0	0	0	0	0	0	0	0	0	0	0
Y(1341)	0	0	0	0	0	0	0	0	0	0	0	0	0	0		Z(1341)	0	0	0	0	0	0	0	0	0	0	0	0	0	0
Y(1342)	0	0	0	0	0	0	0	0	0	0	0	0	0	0		Z(1342)	0	0	0	0	0	0	0	0	0	0	0	0	0	0
Y(1343)	0	0	0	0	0	0	0	0	0	0	0	0	0	0		Z(1343)	0	0	0	0	0	0	0	0	0	0	0	0	0	0
Y(1344)	0	0	0	0	0	0	0	0	0	0	0	0	0	0		Z(1344)	0	0	0	0	0	0	0	0	0	0	0	0	0	0
Y(1345)	0	0	0	0	0	0	0	0	0	0	0	0	0	0		Z(1345)	0	0	0	0	0	0	0	0	0	0	0	0	0	0
Y(1346)	0	0	0	0	0	0	0	0	0	0	0	0	0	0		Z(1346)	0	0	0	0	0	0	0	0	0	0	0	0	0	0
Y(1347)	0	0	0	0	0	0	0	0	0	0	0	0	0	0		Z(1347)	0	0	0	0	0	0	0	0	0	0	0	0	0	0
Y(1348)	0	0	0	0	0	0	0	0	0	0	0	0	0	0		Z(1348)	0	0	0	0	0	0	0	0	0	0	0	0	0	0
Y(1349)	0	0	0	0	0	0	0	0	0	0	0	0	0	0		Z(1349)	0	0	0	0	0	0	0	0	0	0	0	0	0	0
Y(1350)	0	0	0	0	0	0	0	0	0	0	0	0	0	0		Z(1350)	0	0	0	0	0	0	0	0	0	0	0	0	0	0
Y(1351)	0	0	0	0	0	0	0	0	0	0	0	0	0	0		Z(1351)	0	0	0	0	0	0	0	0	0	0	0	0	0	0
Y(1352)	0	0	0	0	0	0	0	0	0	0	0	0	0	0		Z(1352)	0	0	0	0	0	0	0	0	0	0	0	0	0	0
Y(1353)	0	0	0	0	0	0	0	0	0	0	0	0	0	0		Z(1353)	0	0	0	0	0	0	0	0	0	0	0	0	0	0
Y(1354)	0	0	0	0	0	0	0	0	0	0	0	0	0	0		Z(1354)	0	0	0	0	0	0	0	0	0	0	0	0	0	0
Y(1355)	0	0	0	0	0	0	0	0	0	0	0	0	0	0		Z(1355)	0	0	0	0	0	0	0	0	0	0	0	0	0	0
Y(1356)	0	0	0	0	0	0	0	0	0	0	0	0	0	0		Z(1356)	0	0	0	0	0	0	0	0	0	0	0	0	0	0
Y(1357)	0	0	0	0	0	0	0	0	0	0	0	0	0	0		Z(1357)	0	0	0	0	0	0	0	0	0	0	0	0	0	0
Y(1358)	0	0	0	0	0	0	0	0	0	0	0	0	0	0		Z(1358)	0	0	0	0	0	0	0	0	0	0	0	0	0	0
Y(1359)	0	0	0	0	0	0	0	0	0	0	0	0	0	0		Z(1359)	0	0	0	0	0	0	0	0	0	0	0	0	0	0
Y(1360)	0	0	0	0	0	0	0	0	0	0	0	0	0	0		Z(1360)	0	0	0	0	0	0	0	0	0	0	0	0	0	0
Y(1361)	0	0	0	0	0	0	0	0	0	0	0	0	0	0		Z(1361)	0	0	0	0	0	0	0	0	0	0	0	0	0	0
Y(1362)	0	0	0	0	0	0	0	0	0	0	0	0	0	0		Z(1362)	0	0	0	0	0	0	0	0	0	0	0	0	0	0
Y(1363)	0	0	0	0	0	0	0	0	0	0	0	0	0	0		Z(1363)	0	0	0	0	0	0	0	0	0	0	0	0	0	0
Y(1364)	0	0	0	0	0	0	0	0	0	0	0	0	0	0		Z(1364)	0	0	0	0	0	0	0	0	0	0	0	0	0	0
Y(1365)	0	0	0	0	0	0	0	0	0	0	0	0	0	0		Z(1365)	0	0	0	0	0	0	0	0	0	0	0	0	0	0
Y(1366)	0	0	0	0	0	0	0	0	0	0	0	0	0	0		Z(1366)	0	0	0	0	0	0	0	0	0	0	0	0	0	0
Y(1367)	0	0	0	0	0	0	0	0	0	0	0	0	0	0		Z(1367)	0	0	0	0	0	0	0	0	0	0	0	0	0	0
Y(1368)	0	0	0	0	0	0	0	0	0	0	0	0	0	0		Z(1368)	0	0	0	0	0	0	0	0	0	0	0	0	0	0
Y(1369)	0	0	0	0	0	0	0	0	0	0	0	0	0	0		Z(1369)	0	0	0	0	0	0	0	0	0	0	0	0	0	0
Y(1370)	0	0	0	0	0	0	0	0	0	0	0	0	0	0		Z(1370)	0	0	0	0	0	0	0	0	0	0	0	0	0	0
Y(1371)	0	0	0	0	0	0	0	0	0	0	0	0	0	0		Z(1371)	0	0	0	0	0	0	0	0	0	0	0	0	0	0
Y(1372)	0	0	0	0	0	0	0	0	0	0	0	0	0	0		Z(1372)	0	0	0	0	0	0	0	0	0	0	0	0	0	0
Y(1373)	0	0	0	0	0	0	0	0	0	0	0	0	0	0		Z(1373)	0	0	0	0	0	0	0	0	0	0	0	0	0	0
Y(1374)	0	0	0	0	0	0	0	0	0	0	0	0	0	0		Z(1374)	0	0	0	0	0	0	0	0	0	0	0	0	0	0
Y(1375)	0	0	0	0	0	0	0	0	0	0	0	0	0	0		Z(1375)	0	0	0	0	0	0	0	0	0	0	0	0	0	0
Y(1376)	0	0	0	0	0	0	0	0	0	0	0	0	0	0		Z(1376)	0	0	0	0	0	0	0	0	0	0	0	0	0	0
Y(1377)	0	0	0	0	0	0	0	0	0	0	0	0	0	0		Z(1377)	0	0	0	0	0	0	0	0	0	0	0	0	0	0
Y(1378)	0	0	0	0	0	0	0	0	0	0	0	0	0	0		Z(1378)	0	0	0	0	0	0	0	0	0	0	0	0	0	0
Y(1379)	0	0	0	0	0	0	0	0	0	0	0	0	0	0		Z(1379)	0	0	0	0	0	0	0	0	0	0	0	0	0	0
Y(1380)	0	0	0	0	0	0	0	0	0	0	0	0	0	0		Z(1380)	0	0	0	0	0	0	0	0	0	0	0	0	0	0
Y(1381)	0	0	0	0	0	0	0	0	0	0	0	0	0	0		Z(1381)	0	0	0	0	0	0	0	0	0	0	0	0	0	0
Y(1382)	0	0	0	0	0	0	0	0	0	0	0	0	0	0		Z(1382)	0	0	0	0	0	0	0	0	0	0	0	0	0	0
Y(1383)	0	0	0	0	0	0	0	0	0	0	0	0	0	0		Z(1383)	0	0	0	0	0	0	0	0	0	0	0	0	0	0
Y(1384)	0	0	0	0	0	0	0	0	0	0	0	0	0	0		Z(1384)	0	0	0	0	0	0	0	0	0	0	0	0	0	0
Y(1385)	0	0	0	0	0	0	0	0	0	0	0	0	0	0		Z(1385)	0	0	0	0	0	0	0	0	0	0	0	0	0	0
Y(1386)	0	0	0	0	0	0	0	0	0	0	0	0	0	0		Z(1386)	0	0	0	0	0	0	0	0	0	0	0	0	0	0
Y(1387)	0	0	0	0	0	0	0	0	0	0	0	0	0	0		Z(1387)	0	0	0	0	0	0	0	0	0	0	0	0	0	0
Y(1388)	0	0	0	0	0	0	0	0	0	0	0	0	0	0		Z(1388)	0	0	0	0	0	0	0	0	0	0	0	0	0	0
Y(1389)	0	0	0	0	0	0	0	0	0	0	0	0	0	0		Z(1389)	0	0	0	0	0	0	0	0	0	0	0	0	0	0
Y(1390)	0	0	0	0	0	0	0	0	0	0	0	0	0	0		Z(1390)	0	0	0	0	0	0	0	0	0	0	0	0	0	0
Y(1391)	0	0	0	0	0	0	0	0	0	0	0	0	0	0		Z(1391)	0	0	0	0	0	0	0	0	0	0	0	0	0	0
Y(1392)	0	0	0	0	0	0	0	0	0	0	0	0	0	0		Z(1392)	0	0	0	0	0	0	0	0	0	0	0	0	0	0
Y(1393)	0	0	0	0	0	0	0	0	0	0	0	0	0	0		Z(1393)	0	0	0	0	0	0	0	0	0	0	0	0	0	0
Y(1394)	0	0	0	0	0	0	0	0	0	0	0	0	0	0		Z(1394)	0	0	0	0	0	0	0	0	0	0	0	0	0	0
Y(1395)	0	0	0	0	0	0	0	0	0	0	0	0	0	0		Z(1395)	0	0	0	0	0	0	0	0	0	0	0	0	0	0
Y(1396)	0	0	0	0	0	0	0	0	0	0	0	0	0	0		Z(1396)	0	0	0	0	0	0	0	0	0	0	0	0	0	0
Y(1397)	0	0	0	0	0	0	0	0	0	0	0	0	0	0		Z(1397)	0	0	0	0	0	0	0	0	0	0	0	0	0	0
Y(1398)	0	0	0	0	0	0	0	0	0	0	0	0	0	0		Z(1398)	0	0	0	0	0	0	0	0	0	0	0	0	0	0
Y(1399)	0	0	0	0	0	0	0	0	0	0	0	0	0	0		Z(1399)	0	0	0	0	0	0	0	0	0	0	0	0	0	0
Y(1400)	0	0	0	0	0	0	0	0	0	0	0	0	0	0		Z(1400)	0	0	0	0	0	0	0	0	0	0	0	0	0	0
Y(1401)	0	0	0	0	0	0	0	0	0	0	0	0	0	0		Z(1401)	0	0	0	0	0	0	0	0	0	0	0	0	0	0
Y(1402)	0	0	0	0	0	0	0	0	0	0	0	0	0	0		Z(1402)	0	0	0	0	0	0	0	0	0	0	0	0	0	0
Y(1403)	0	0	0	0	0	0	0	0	0	0	0	0	0	0		Z(1403)	0	0	0	0	0	0	0	0	0	0	0	0	0	0
Y(1404)	0	0	0	0	0	0	0	0	0	0	0	0	0	0		Z(1404)	0	0	0	0	0	0	0	0	0	0	0	0	0	0
Y(1405)	0	0	0	0	0	0	0	0	0	0	0	0	0	0		Z(1405)	0	0	0	0	0	0	0	0	0	0	0	0	0	0
Y(1406)	0	0	0	0	0	0	0	0	0	0	0	0	0	0		Z(1406)	0	0	0	0	0	0	0	0	0	0	0	0	0	0
Y(1407)	0	0	0	0	0	0	0	0	0	0	0	0	0	0		Z(1407)	0	0	0	0	0	0	0	0	0	0	0	0	0	0
Y(1408)	0	0	0	0	0	0	0	0	0	0	0	0	0	0		Z(1408)	0	0	0	0	0	0	0	0	0	0	0	0	0	0
Y(1409)	0	0	0	0	0	0	0	0	0	0	0	0	0	0		Z(1409)	0	0	0	0	0	0	0	0	0	0	0	0	0	0
Y(1410)	0	0	0	0	0	0	0	0	0	0	0	0	0	0		Z(1410)	0	0	0	0	0	0	0	0	0	0	0	0	0	0
Y(1411)	0	0	0	0	0	0	0	0	0	0	0	0	0	0		Z(1411)	0	0	0	0	0	0	0	0	0	0	0	0	0	0
Y(1412)	0	0	0	0	0	0	0	0	0	0	0	0	0	0		Z(1412)	0	0	0	0	0	0	0	0	0	0	0	0	0	0
Y(1413)	0	0	0	0	0	0	0	0	0	0	0	0	0	0		Z(1413)	0	0	0	0	0	0	0	0	0	0	0	0	0	0
Y(1414)	0	0	0	0	0	0	0	0	0	0	0	0	0	0		Z(1414)	0	0	0	0	0	0	0	0	0	0	0	0	0	0
Y(1415)	0	0	0	0	0	0	0	0	0	0	0	0	0	0		Z(1415)	0	0	0	0	0	0	0	0	0	0	0	0	0	0
Y(1416)	0	0	0	0	0	0	0	0	0	0	0	0	0	0		Z(1416)	0	0	0	0	0	0	0	0	0	0	0	0	0	0
Y(1417)	0	0	0	0	0	0	0	0	0	0	0	0	0	0		Z(1417)	0	0	0	0	0	0	0	0	0	0	0	0	0	0
Y(1418)	0	0	0	0	0	0	0	0	0	0	0	0	0	0		Z(1418)	0	0	0	0	0	0	0	0	0	0	0	0	0	0
Y(1419)	0	0	0	0	0	0	0	0	0	0	0	0	0	0		Z(1419)	0	0	0	0	0	0	0	0	0	0	0	0	0	0
Y(1420)	0	0	0	0	0	0	0	0	0	0	0	0	0	0		Z(1420)	0	0	0	0	0	0	0	0	0	0	0	0	0	0
Y(1421)	0	0	0	0	0	0	0	0	0	0	0	0	0	0		Z(1421)	0	0	0	0	0	0	0	0	0	0	0	0	0	0
Y(1422)	0	0	0	0	0	0	0	0	0	0	0	0	0	0		Z(1422)	0	0	0	0	0	0	0	0	0	0	0	0	0	0
Y(1423)	0	0	0	0	0	0	0	0	0	0	0	0	0	0		Z(1423)	0	0	0	0	0	0	0	0	0	0	0	0	0	0
Y(1424)	0	0	0	0	0	0	0	0	0	0	0	0	0	0		Z(1424)	0	0	0	0	0	0	0	0	0	0	0	0	0	0
Y(1425)	0	0	0	0	0	0	0	0	0	0	0	0	0	0		Z(1425)	0	0	0	0	0	0	0	0	0	0	0	0	0	0
Y(1426)	0	0	0	0	0	0	0	0	0	0	0	0	0	0		Z(1426)	0	0	0	0	0	0	0	0	0	0	0	0	0	0
Y(1427)	0	0	0	0	0	0	0	0	0	0	0	0	0	0		Z(1427)	0	0	0	0	0	0	0	0	0	0	0	0	0	0
Y(1428)	0	0	0	0	0	0	0	0	0	0	0	0	0	0		Z(1428)	0	0	0	0	0	0	0	0	0	0	0	0	0	0
Y(1429)	0	0	0	0	0	0	0	0	0	0	0	0	0	0		Z(1429)	0	0	0	0	0	0	0	0	0	0	0	0	0	0
Y(1430)	0	0	0	0	0	0	0	0	0	0	0	0	0	0		Z(1430)	0	0	0	0	0	0	0	0	0	0	0	0	0	0
Y(1431)	0	0	0	0	0	0	0	0	0	0	0	0	0	0		Z(1431)	0	0	0	0	0	0	0	0	0	0	0	0	0	0
Y(1432)	0	0	0	0	0	0	0	0	0	0	0	0	0	0		Z(1432)	0	0	0	0	0	0	0	0	0	0	0	0	0	0
Y(1433)	0	0	0	0	0	0	0	0	0	0	0	0	0	0		Z(1433)	0	0	0	0	0	0	0	0	0	0	0	0	0	0
Y(1434)	0	0	0	0	0	0	0	0	0	0	0	0	0	0		Z(1434)	0	0	0	0	0	0	0	0	0	0	0	0	0	0
Y(1435)	0	0	0	0	0	0	0	0	0	0	0	0	0	0		Z(1435)	0	0	0	0	0	0	0	0	0	0	0	0	0	0
Y(1436)	0	0	0	0	0	0	0	0	0	0	0	0	0	0		Z(1436)	0	0	0	0	0	0	0	0	0	0	0	0	0	0
Y(1437)	0	0	0	0	0	0	0	0	0	0	0	0	0	0		Z(1437)	0	0	0	0	0	0	0	0	0	0	0	0	0	0
Y(1438)	0	0	0	0	0	0	0	0	0	0	0	0	0	0		Z(1438)	0	0	0	0	0	0	0	0	0	0	0	0	0	0
Y(1439)	0	0	0	0	0	0	0	0	0	0	0	0	0	0		Z(1439)	0	0	0	0	0	0	0	0	0	0	0	0	0	0
Y(1440)	0	0	0	0	0	0	0	0	0	0	0	0	0	0		Z(1440)	0	0	0	0	0	0	0	0	0	0	0	0	0	0
Y(1441)	0	0	0	0	0	0	0	0	0	0	0	0	0	0		Z(1441)	0	0	0	0	0	0	0	0	0	0	0	0	0	0
Y(1442)	0	0	0	0	0	0	0	0	0	0	0	0	0	0		Z(1442)	0	0	0	0	0	0	0	0	0	0	0	0	0	0
Y(1443)	0	0	0	0	0	0	0	0	0	0	0	0	0	0		Z(1443)	0	0	0	0	0	0	0	0	0	0	0	0	0	0
Y(1444)	0	0	0	0	0	0	0	0	0	0	0	0	0	0		Z(1444)	0	0	0	0	0	0	0	0	0	0	0	0	0	0
Y(1445)	0	0	0	0	0	0	0	0	0	0	0	0	0	0		Z(1445)	0	0	0	0	0	0	0	0	0	0	0	0	0	0
Y(1446)	0	0	0	0	0	0	0	0	0	0	0	0	0	0		Z(1446)	0	0	0	0	0	0	0	0	0	0	0	0	0	0
Y(1447)	0	0	0	0	0	0	0	0	0	0	0	0	0	0		Z(1447)	0	0	0	0	0	0	0	0	0	0	0	0	0	0
Y(1448)	0	0	0	0	0	0	0	0	0	0	0	0	0	0		Z(1448)	0	0	0	0	0	0	0	0	0	0	0	0	0	0
Y(1449)	0	0	0	0	0	0	0	0	0	0	0	0	0	0		Z(1449)	0	0	0	0	0	0	0	0	0	0	0	0	0	0
Y(1450)	0	0	0	0	0	0	0	0	0	0	0	0	0	0		Z(1450)	0	0	0	0	0	0	0	0	0	0	0	0	0	0
Y(1451)	0	0	0	0	0	0	0	0	0	0	0	0	0	0		Z(1451)	0	0	0	0	0	0	0	0	0	0	0	0	0	0
Y(1452)	0	0	0	0	0	0	0	0	0	0	0	0	0	0		Z(1452)	0	0	0	0	0	0	0	0	0	0	0	0	0	0
Y(1453)	0	0	0	0	0	0	0	0	0	0	0	0	0	0		Z(1453)	0	0	0	0	0	0	0	0	0	0	0	0	0	0
Y(1454)	0	0	0	0	0	0	0	0	0	0	0	0	0	0		Z(1454)	0	0	0	0	0	0	0	0	0	0	0	0	0	0
Y(1455)	0	0	0	0	0	0	0	0	0	0	0	0	0	0		Z(1455)	0	0	0	0	0	0	0	0	0	0	0	0	0	0
Y(1456)	0	0	0	0	0	0	0	0	0	0	0	0	0	0		Z(1456)	0	0	0	0	0	0	0	0	0	0	0	0	0	0
Y(1457)	0	0	0	0	0	0	0	0	0	0	0	0	0	0		Z(1457)	0	0	0	0	0	0	0	0	0	0	0	0	0	0
Y(1458)	0	0	0	0	0	0	0	0	0	0	0	0	0	0		Z(1458)	0	0	0	0	0	0	0	0	0	0	0	0	0	0
Y(1459)	0	0	0	0	0	0	0	0	0	0	0	0	0	0		Z(1459)	0	0	0	0	0	0	0	0	0	0	0	0	0	0
Y(1460)	0	0	0	0	0	0	0	0	0	0	0	0	0	0		Z(1460)	0	0	0	0	0	0	0	0	0	0	0	0	0	0
Y(1461)	0	0	0	0	0	0	0	0	0	0	0	0	0	0		Z(1461)	0	0	0	0	0	0	0	0	0	0	0	0	0	0
Y(1462)	0	0	0	0	0	0	0	0	0	0	0	0	0	0		Z(1462)	0	0	0	0	0	0	0	0	0	0	0	0	0	0
Y(1463)	0	0	0	0	0	0	0	0	0	0	0	0	0	0		Z(1463)	0	0	0	0	0	0	0	0	0	0	0	0	0	0
Y(1464)	0	0	0	0	0	0	0	0	0	0	0	0	0	0		Z(1464)	0	0	0	0	0	0	0	0	0	0	0	0	0	0
Y(1465)	0	0	0	0	0	0	0	0	0	0	0	0	0	0		Z(1465)	0	0	0	0	0	0	0	0	0	0	0	0	0	0
Y(1466)	0	0	0	0	0	0	0	0	0	0	0	0	0	0		Z(1466)	0	0	0	0	0	0	0	0	0	0	0	0	0	0
Y(1467)	0	0	0	0	0	0	0	0	0	0	0	0	0	0		Z(1467)	0	0	0	0	0	0	0	0	0	0	0	0	0	0
Y(1468)	0	0	0	0	0	0	0	0	0	0	0	0	0	0		Z(1468)	0	0	0	0	0	0	0	0	0	0	0	0	0	0
Y(1469)	0	0	0	0	0	0	0	0	0	0	0	0	0	0		Z(1469)	0	0	0	0	0	0	0	0	0	0	0	0	0	0
Y(1470)	0	0	0	0	0	0	0	0	0	0	0	0	0	0		Z(1470)	0	0	0	0	0	0	0	0	0	0	0	0	0	0
Y(1471)	0	0	0	0	0	0	0	0	0	0	0	0	0	0		Z(1471)	0	0	0	0	0	0	0	0	0	0	0	0	0	0
Y(1472)	0	0	0	0	0	0	0	0	0	0	0	0	0	0		Z(1472)	0	0	0	0	0	0	0	0	0	0	0	0	0	0
Y(1473)	0	0	0	0	0	0	0	0	0	0	0	0	0	0		Z(1473)	0	0	0	0	0	0	0	0	0	0	0	0	0	0
Y(1474)	0	0	0	0	0	0	0	0	0	0	0	0	0	0		Z(1474)	0	0	0	0	0	0	0	0	0	0	0	0	0	0
Y(1475)	0	0	0	0	0	0	0	0	0	0	0	0	0	0		Z(1475)	0	0	0	0	0	0	0	0	0	0	0	0	0	0
Y(1476)	0	0	0	0	0	0	0	0	0	0	0	0	0	0		Z(1476)	0	0	0	0	0	0	0	0	0	0	0	0	0	0
Y(1477)	0	0	0	0	0	0	0	0	0	0	0	0	0	0		Z(1477)	0	0	0	0	0	0	0	0	0	0	0	0	0	0
Y(1478)	0	0	0	0	0	0	0	0	0	0	0	0	0	0		Z(1478)	0	0	0	0	0	0	0	0	0	0	0	0	0	0
Y(1479)	0	0	0	0	0	0	0	0	0	0	0	0	0	0		Z(1479)	0	0	0	0	0	0	0	0	0	0	0	0	0	0
Y(1480)	0	0	0	0	0	0	0	0	0	0	0	0	0	0		Z(1480)	0	0	0	0	0	0	0	0	0	0	0	0	0	0
Y(1481)	0	0	0	0	0	0	0	0	0	0	0	0	0	0		Z(1481)	0	0	0	0	0	0	0	0	0	0	0	0	0	0
Y(1482)	0	0	0	0	0	0	0	0	0	0	0	0	0	0		Z(1482)	0	0	0	0	0	0	0	0	0	0	0	0	0	0
Y(1483)	0	0	0	0	0	0	0	0	0	0	0	0	0	0		Z(1483)	0	0	0	0	0	0	0	0	0	0	0	0	0	0
Y(1484)	0	0	0	0	0	0	0	0	0	0	0	0	0	0		Z(1484)	0	0	0	0	0	0	0	0	0	0	0	0	0	0
Y(1485)	0	0	0	0	0	0	0	0	0	0	0	0	0	0		Z(1485)	0	0	0	0	0	0	0	0	0	0	0	0	0	0
Y(1486)	0	0	0	0	0	0	0	0	0	0	0	0	0	0		Z(1486)	0	0	0	0	0	0	0	0	0	0	0	0	0	0
Y(1487)	0	0	0	0	0	0	0	0	0	0	0	0	0	0		Z(1487)	0	0	0	0	0	0	0	0	0	0	0	0	0	0
Y(1488)	0	0	0	0	0	0	0	0	0	0	0	0	0	0		Z(1488)	0	0	0	0	0	0	0	0	0	0	0	0	0	0
Y(1489)	0	0	0	0	0	0	0	0	0	0	0	0	0	0		Z(1489)	0	0	0	0	0	0	0	0	0	0	0	0	0	0
Y(1490)	0	0	0	0	0	0	0	0	0	0	0	0	0	0		Z(1490)	0	0	0	0	0	0	0	0	0	0	0	0	0	0
Y(1491)	0	0	0	0	0	0	0	0	0	0	0	0	0	0		Z(1491)	0	0	0	0	0	0	0	0	0	0	0	0	0	0
Y(1492)	0	0	0	0	0	0	0	0	0	0	0	0	0	0		Z(1492)	0	0	0	0	0	0	0	0	0	0	0	0	0	0
Y(1493)	0	0	0	0	0	0	0	0	0	0	0	0	0	0		Z(1493)	0	0	0	0	0	0	0	0	0	0	0	0	0	0
Y(1494)	0	0	0	0	0	0	0	0	0	0	0	0	0	0		Z(1494)	0	0	0	0	0	0	0	0	0	0	0	0	0	0
Y(1495)	0	0	0	0	0	0	0	0	0	0	0	0	0	0		Z(1495)	0	0	0	0	0	0	0	0	0	0	0	0	0	0
Y(1496)	0	0	0	0	0	0	0	0	0	0	0	0	0	0		Z(1496)	0	0	0	0	0	0	0	0	0	0	0	0	0	0
Y(1497)	0	0	0	0	0	0	0	0	0	0	0	0	0	0		Z(1497)	0	0	0	0	0	0	0	0	0	0	0	0	0	0
Y(1498)	0	0	0	0	0	0	0	0	0	0	0	0	0	0		Z(1498)	0	0	0	0	0	0	0	0	0	0	0	0	0	0
Y(1499)	0	0	0	0	0	0	0	0	0	0	0	0	0	0		Z(1499)	0	0	0	0	0	0	0	0	0	0	0	0	0	0
Y(1500)	0	0	0	0	0	0	0	0	0	0	0	0	0	0		Z(1500)	0	0	0	0	0	0	0	0	0	0	0	0	0	0
Y(1501)	0	0	0	0	0	0	0	0	0	0	0	0	0	0		Z(1501)	0	0	0	0	0	0	0	0	0	0	0	0	0	0
Y(1502)	0	0	0	0	0	0	0	0	0	0	0	0	0	0		Z(1502)	0	0	0	0	0	0	0	0	0	0	0	0	0	0
Y(1503)	0	0	0	0	0	0	0	0	0	0	0	0	0	0		Z(1503)	0	0	0	0	0	0	0	0	0	0	0	0	0	0
Y(1504)	0	0	0	0	0	0	0	0	0	0	0	0	0	0		Z(1504)	0	0	0	0	0	0	0	0	0	0	0	0	0	0
Y(1505)	0	0	0	0	0	0	0	0	0	0	0	0	0	0		Z(1505)	0	0	0	0	0	0	0	0	0	0	0	0	0	0
Y(1506)	0	0	0	0	0	0	0	0	0	0	0	0	0	0		Z(1506)	0	0	0	0	0	0	0	0	0	0	0	0	0	0
Y(1507)	0	0	0	0	0	0	0	0	0	0	0	0	0	0		Z(1507)	0	0	0	0	0	0	0	0	0	0	0	0	0	0
Y(1508)	0	0	0	0	0	0	0	0	0	0	0	0	0	0		Z(1508)	0	0	0	0	0	0	0	0	0	0	0	0	0	0
Y(1509)	0	0	0	0	0	0	0	0	0	0	0	0	0	0		Z(1509)	0	0	0	0	0	0	0	0	0	0	0	0	0	0
Y(1510)	0	0	0	0	0	0	0	0	0	0	0	0	0	0		Z(1510)	0	0	0	0	0	0	0	0	0	0	0	0	0	0
Y(1511)	0	0	0	0	0	0	0	0	0	0	0	0	0	0		Z(1511)	0	0	0	0	0	0	0	0	0	0	0	0	0	0
Y(1512)	0	0	0	0	0	0	0	0	0	0	0	0	0	0		Z(1512)	0	0	0	0	0	0	0	0	0	0	0	0	0	0
Y(1513)	0	0	0	0	0	0	0	0	0	0	0	0	0	0		Z(1513)	0	0	0	0	0	0	0	0	0	0	0	0	0	0
Y(1514)	0	0	0	0	0	0	0	0	0	0	0	0	0	0		Z(1514)	0	0	0	0	0	0	0	0	0	0	0	0	0	0
Y(1515)	0	0	0	0	0	0	0	0	0	0	0	0	0	0		Z(1515)	0	0	0	0	0	0	0	0	0	0	0	0	0	0
Y(1516)	0	0	0	0	0	0	0	0	0	0	0	0	0	0		Z(1516)	0	0	0	0	0	0	0	0	0	0	0	0	0	0
Y(1517)	0	0	0	0	0	0	0	0	0	0	0	0	0	0		Z(1517)	0	0	0	0	0	0	0	0	0	0	0	0	0	0
Y(1518)	0	0	0	0	0	0	0	0	0	0	0	0	0	0		Z(1518)	0	0	0	0	0	0	0	0	0	0	0	0	0	0
Y(1519)	0	0	0	0	0	0	0	0	0	0	0	0	0	0		Z(1519)	0	0	0	0	0	0	0	0	0	0	0	0	0	0
Y(1520)	0	0	0	0	0	0	0	0	0	0	0	0	0	0		Z(1520)	0	0	0	0	0	0	0	0	0	0	0	0	0	0
Y(1521)	0	0	0	0	0	0	0	0	0	0	0	0	0	0		Z(1521)	0	0	0	0	0	0	0	0	0	0	0	0	0	0
Y(1522)	0	0	0	0	0	0	0	0	0	0	0	0	0	0		Z(1522)	0	0	0	0	0	0	0	0	0	0	0	0	0	0
Y(1523)	0	0	0	0	0	0	0	0	0	0	0	0	0	0		Z(1523)	0	0	0	0	0	0	0	0	0	0	0	0	0	0
Y(1524)	0	0	0	0	0	0	0	0	0	0	0	0	0	0		Z(1524)	0	0	0	0	0	0	0	0	0	0	0	0	0	0
Y(1525)	0	0	0	0	0	0	0	0	0	0	0	0	0	0		Z(1525)	0	0	0	0	0	0	0	0	0	0	0	0	0	0
Y(1526)	0	0	0	0	0	0	0	0	0	0	0	0	0	0		Z(1526)	0	0	0	0	0	0	0	0	0	0	0	0	0	0
Y(1527)	0	0	0	0	0	0	0	0	0	0	0	0	0	0		Z(1527)	0	0	0	0	0	0	0	0	0	0	0	0	0	0
Y(1528)	0	0	0	0	0	0	0	0	0	0	0	0	0	0		Z(1528)	0	0	0	0	0	0	0	0	0	0	0	0	0	0
Y(1529)	0	0	0	0	0	0	0	0	0	0	0	0	0	0		Z(1529)	0	0	0	0	0	0	0	0	0	0	0	0	0	0
Y(1530)	0	0	0	0	0	0	0	0	0	0	0	0	0	0		Z(1530)	0	0	0	0	0	0	0	0	0	0	0	0	0	0
Y(1531)	0	0	0	0	0	0	0	0	0	0	0	0	0	0		Z(1531)	0	0	0	0	0	0	0	0	0	0	0	0	0	0
Y(1532)	0	0	0	0	0	0	0	0	0	0	0	0	0	0		Z(1532)	0	0	0	0	0	0	0	0	0	0	0	0	0	0
Y(1533)	0	0	0	0	0	0	0	0	0	0	0	0	0	0		Z(1533)	0	0	0	0	0	0	0	0	0	0	0	0	0	0
Y(1534)	0	0	0	0	0	0	0	0	0	0	0	0	0	0		Z(1534)	0	0	0	0	0	0	0	0	0	0	0	0	0	0
Y(1535)	0	0	0	0	0	0	0	0	0	0	0	0	0	0		Z(1535)	0	0	0	0	0	0	0	0	0	0	0	0	0	0
Y(1536)	0	0	0	0	0	0	0	0	0	0	0	0	0	0		Z(1536)	0	0	0	0	0	0	0	0	0	0	0	0	0	0
Y(1537)	0	0	0	0	0	0	0	0	0	0	0	0	0	0		Z(1537)	0	0	0	0	0	0	0	0	0	0	0	0	0	0
Y(1538)	0	0	0	0	0	0	0	0	0	0	0	0	0	0		Z(1538)	0	0	0	0	0	0	0	0	0	0	0	0	0	0
Y(1539)	0	0	0	0	0	0	0	0	0	0	0	0	0	0		Z(1539)	0	0	0	0	0	0	0	0	0	0	0	0	0	0
Y(1540)	0	0	0	0	0	0	0	0	0	0	0	0	0	0		Z(1540)	0	0	0	0	0	0	0	0	0	0	0	0	0	0
Y(1541)	0	0	0	0	0	0	0	0	0	0	0	0	0	0		Z(1541)	0	0	0	0	0	0	0	0	0	0	0	0	0	0
Y(1542)	0	0	0	0	0	0	0	0	0	0	0	0	0	0		Z(1542)	0	0	0	0	0	0	0	0	0	0	0	0	0	0
Y(1543)	0	0	0	0	0	0	0	0	0	0	0	0	0	0		Z(1543)	0	0	0	0	0	0	0	0	0	0	0	0	0	0
Y(1544)	0	0	0	0	0	0	0	0	0	0	0	0	0	0		Z(1544)	0	0	0	0	0	0	0	0	0	0	0	0	0	0
Y(1545)	0	0	0	0	0	0	0	0	0	0	0	0	0	0		Z(1545)	0	0	0	0	0	0	0	0	0	0	0	0	0	0
Y(1546)	0	0	0	0	0	0	0	0	0	0	0	0	0	0		Z(1546)	0	0	0	0	0	0	0	0	0	0	0	0	0	0
Y(1547)	0	0	0	0	0	0	0	0	0	0	0	0	0	0		Z(1547)	0	0	0	0	0	0	0	0	0	0	0	0	0	0
Y(1548)	0	0	0	0	0	0	0	0	0	0	0	0	0	0		Z(1548)	0	0	0	0	0	0	0	0	0	0	0	0	0	0
Y(1549)	0	0	0	0	0	0	0	0	0	0	0	0	0	0		Z(1549)	0	0	0	0	0	0	0	0	0	0	0	0	0	0
Y(1550)	0	0	0	0	0	0	0	0	0	0	0	0	0	0		Z(1550)	0	0	0	0	0	0	0	0	0	0	0	0	0	0
Y(1551)	0	0	0	0	0	0	0	0	0	0	0	0	0	0		Z(1551)	0	0	0	0	0	0	0	0	0	0	0	0	0	0
Y(1552)	0	0	0	0	0	0	0	0	0	0	0	0	0	0		Z(1552)	0	0	0	0	0	0	0	0	0	0	0	0	0	0
Y(1553)	0	0	0	0	0	0	0	0	0	0	0	0	0	0		Z(1553)	0	0	0	0	0	0	0	0	0	0	0	0	0	0
Y(1554)	0	0	0	0	0	0	0	0	0	0	0	0	0	0		Z(1554)	0	0	0	0	0	0	0	0	0	0	0	0	0	0
Y(1555)	0	0	0	0	0	0	0	0	0	0	0	0	0	0		Z(1555)	0	0	0	0	0	0	0	0	0	0	0	0	0	0
Y(1556)	0	0	0	0	0	0	0	0	0	0	0	0	0	0		Z(1556)	0	0	0	0	0	0	0	0	0	0	0	0	0	0
Y(1557)	0	0	0	0	0	0	0	0	0	0	0	0	0	0		Z(1557)	0	0	0	0	0	0	0	0	0	0	0	0	0	0
[truncated: 164 more columns]
