# Supplementary figures and images for: A corticostriatal deficit promotes temporal distortion of automatic action in ageing
Source: eLife journal article supplement (doi:10.7554/elife.29908), 2017-10-23

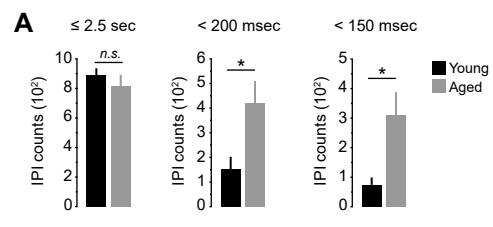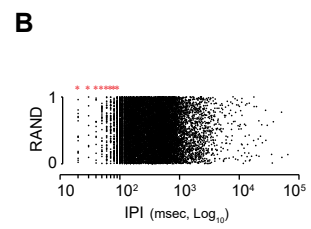

Supplement: supp [file elife-29908-supp-v1.zip › elife_poa_e29908_Figure_3_figure_supplement_1.pdf]

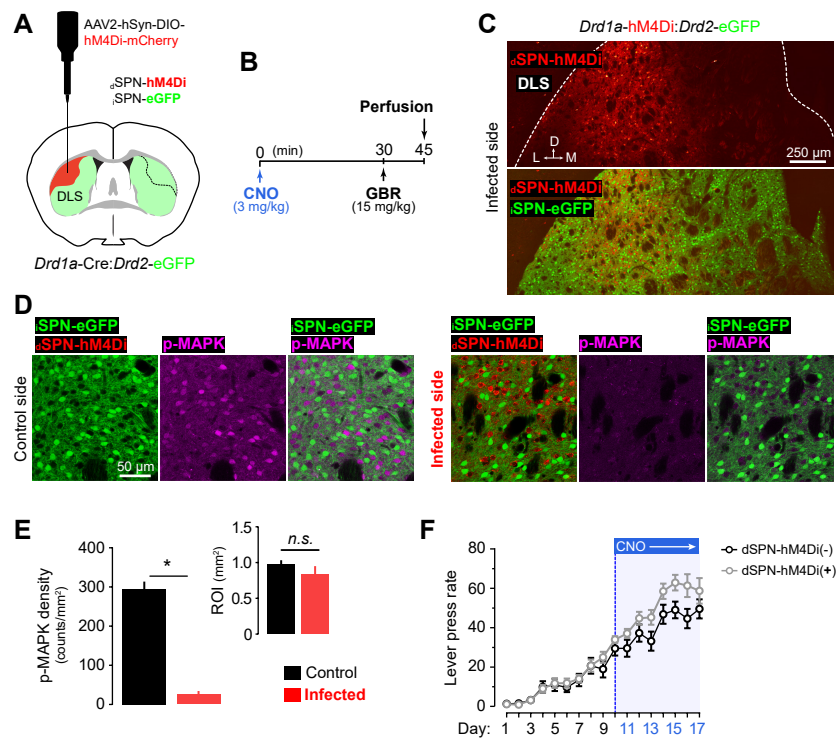

Supplement: supp [file elife-29908-supp-v1.zip › elife_poa_e29908_Figure_5_figure_supplement_1.pdf]

## Young (LH5)

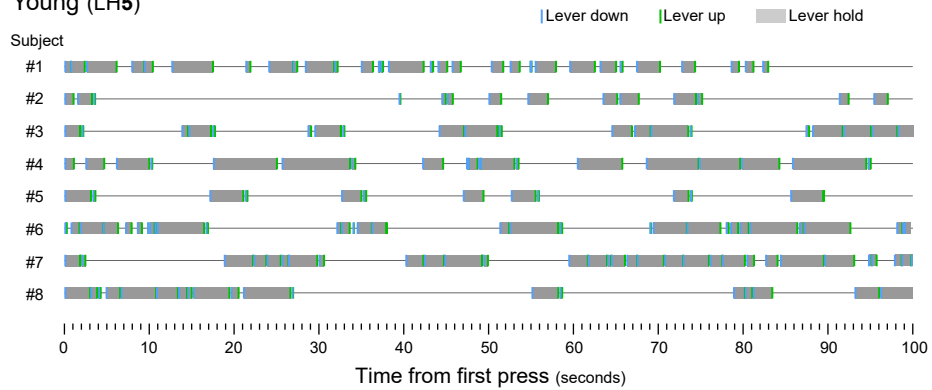

## Aged (LH5)

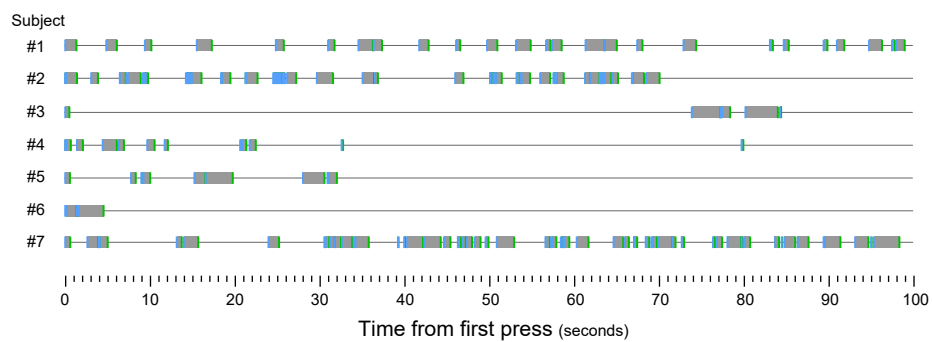

Supplement: supp [file elife-29908-supp-v1.zip › elife_poa_e29908_Figure_2_figure_supplement_1.pdf]

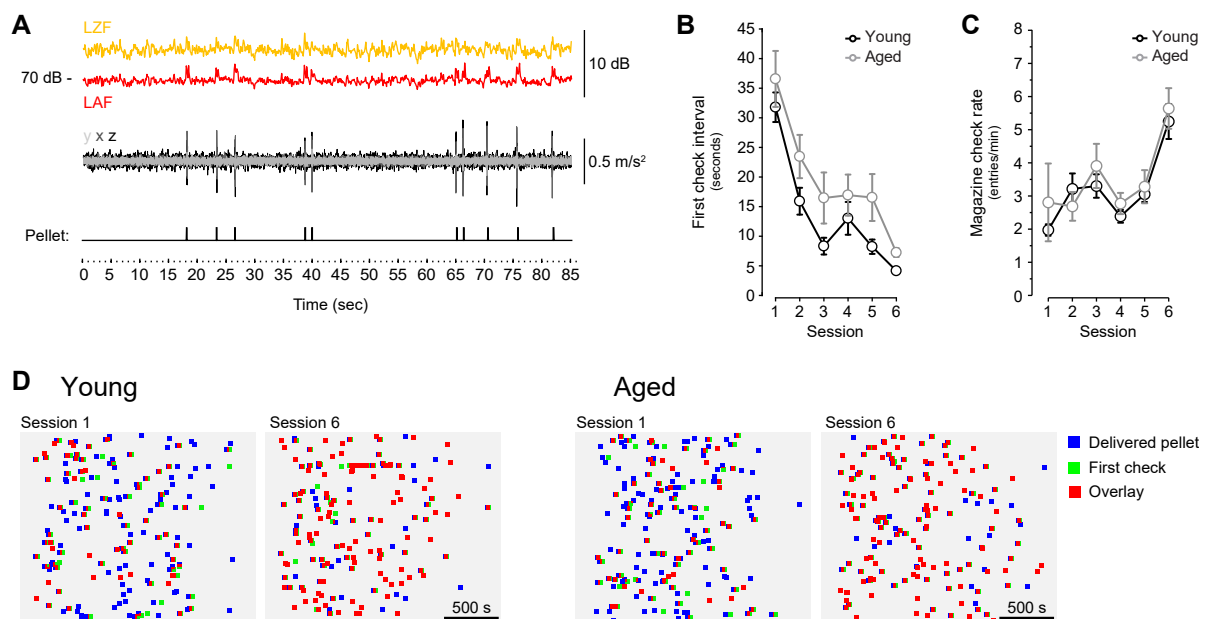

Supplement: supp [file elife-29908-supp-v1.zip › elife_poa_e29908_Figure_1_figure_supplement_2.pdf]

## A Young (day 10)

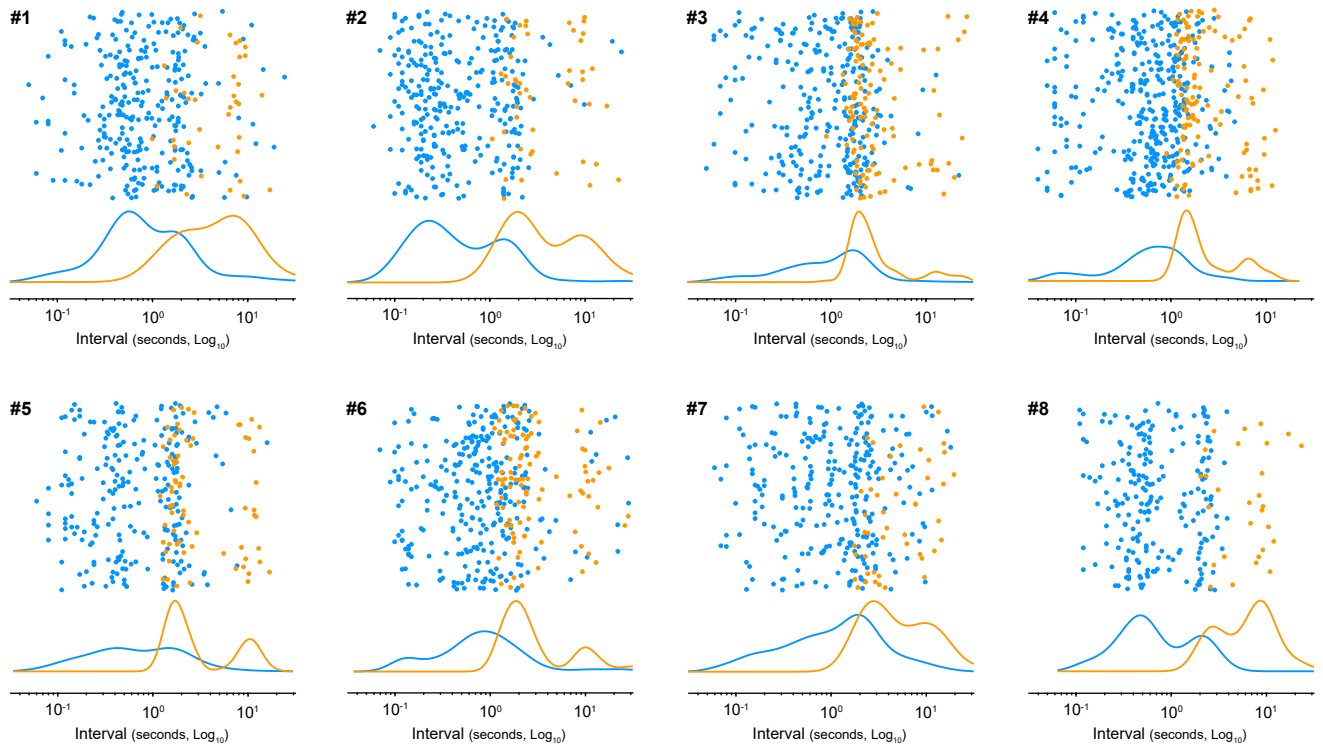

## B Aged (day 10)

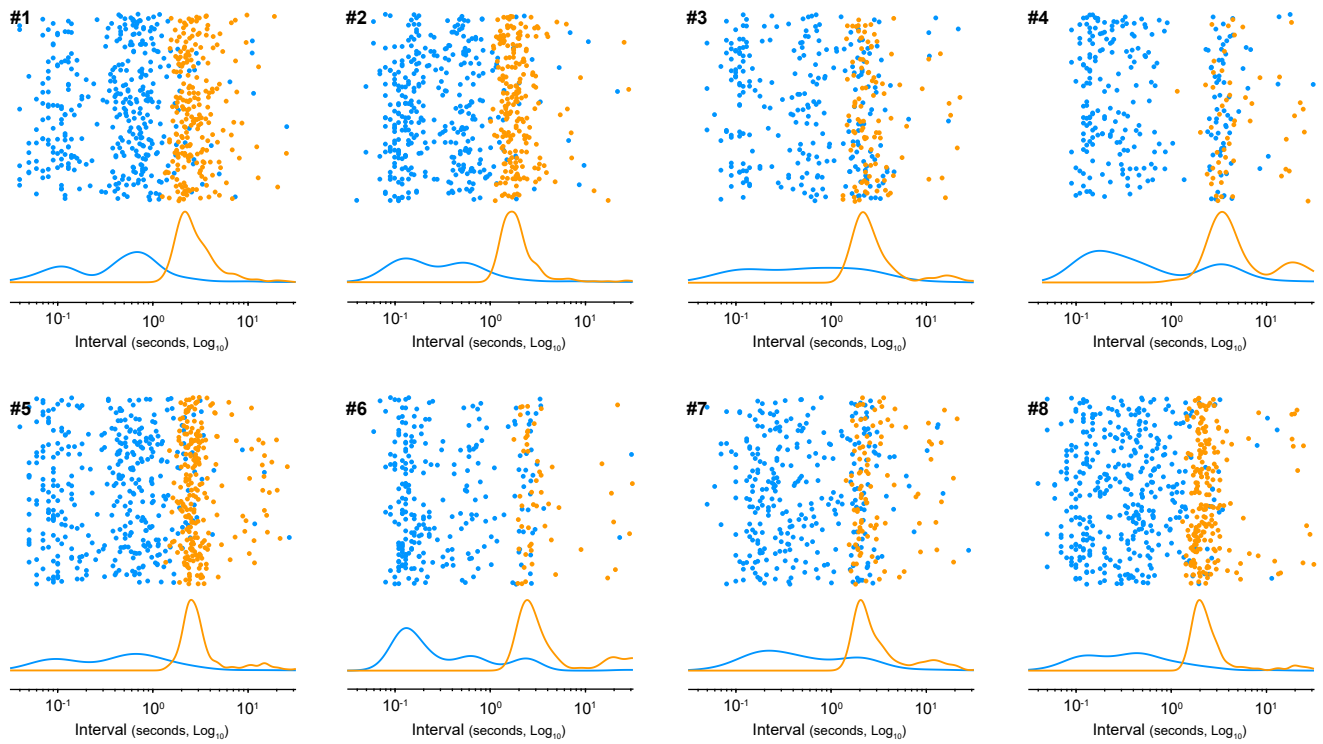

Supplement: supp [file elife-29908-supp-v1.zip › elife_poa_e29908_Figure_3_figure_supplement_2.pdf]

## A Cue Maintained

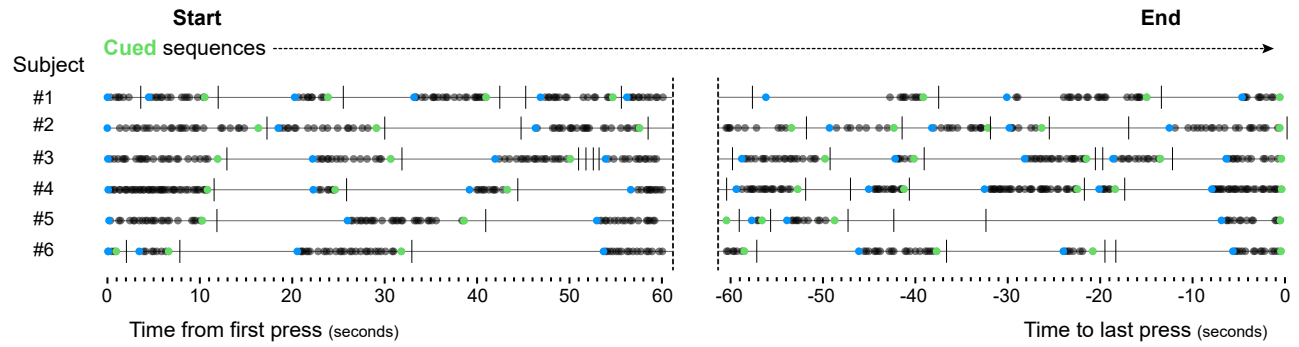

## B Cue Lost

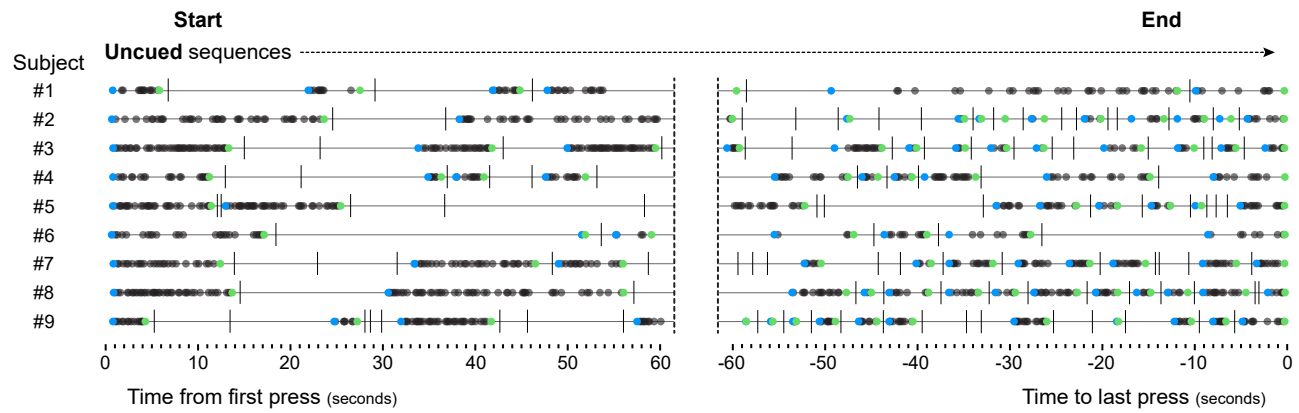

Supplement: supp [file elife-29908-supp-v1.zip › elife_poa_e29908_Figure_6_figure_supplement_1.pdf]

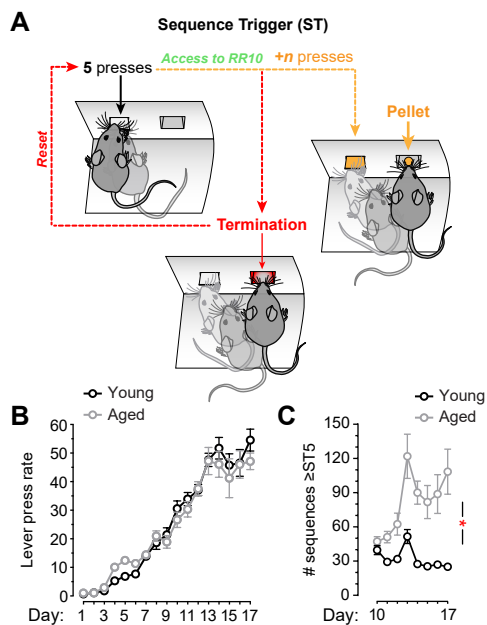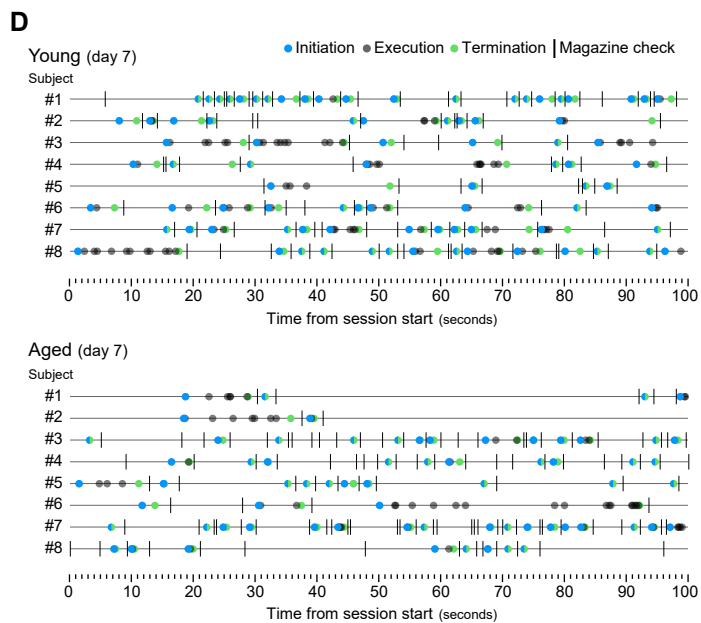

Supplement: supp [file elife-29908-supp-v1.zip › elife_poa_e29908_Figure_1_figure_supplement_1.pdf]

**A** dSPN-hM4Di(-) (day 17)

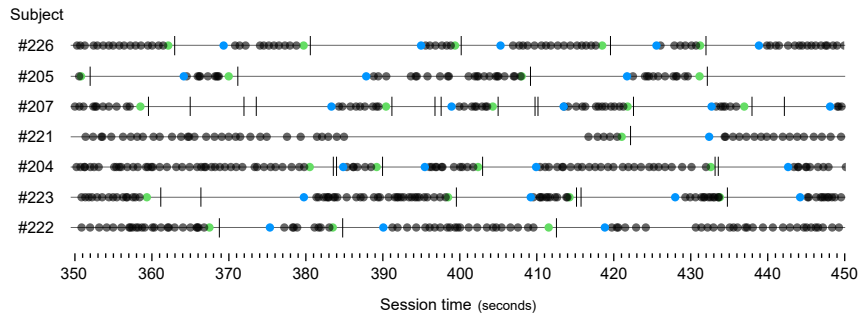

**B** dSPN-hM4Di(+) (day 17)

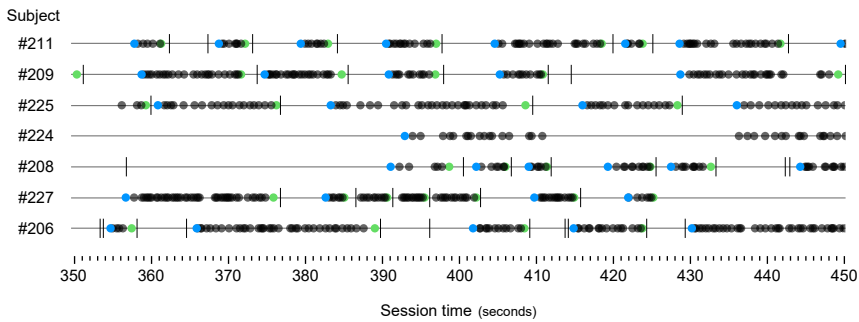

Supplement: supp [file elife-29908-supp-v1.zip › elife_poa_e29908_Figure_5_figure_supplement_2.pdf]
